# Supplementary material for: Microbial Profiling of Amniotic Fluid, Umbilical Blood and Placenta of the Foaling Mare
Source: MDPI journal article supplement (doi:10.3390/ani13122029), 2023-06-18
Supplement: s1 [file s1]

[illegible]







[illegible]

|                     |                       |                       |
|---------------------|-----------------------|-----------------------|
| Bacteroidetes       | Flavobacteriia        | Flavobacteriales      |
| Bacteroidetes       | Sphingobacteriia      | Sphingobacteriales    |
| Chlamydiae          | Chlamydiia            | Chlamydiales          |
| Chloroflexi         | Anaerolineae          | Ardenscatenales       |
| Chloroflexi         | Ktedonobacteria       | Thermogemmatisporales |
| Chloroflexi         | Thermomicrobia        | Sphaerobacterales     |
| Cyanobacteria       | Gloeobacterophycideae | Gloeobacterales       |
| Cyanobacteria       | Nostocophycideae      | Nostocales            |
| Deinococcus-Thermus | Deinococci            | Deinococcales         |
| Firmicutes          | Bacilli               | Bacillales            |

[illegible]

[illegible]



[illegible]

[illegible]

[illegible]

[illegible]

[illegible]

[illegible]

[illegible]

[illegible]





|                |                          |                     |
|----------------|--------------------------|---------------------|
| Actinobacteria | Actinobacteria           | Actinomycetales     |
| Actinobacteria | Actinobacteria           | Bifidobacteriales   |
| Actinobacteria | Actinobacteria           | Solirubrobacterales |
| Bacteroidetes  | Bacteroidia              | Bacteroidales       |
| Bacteroidetes  | Cytophagia               | Cytophagales        |
| Bacteroidetes  | Cytophagia               | Cytophagales        |
| Bacteroidetes  | Flavobacteriia           | Flavobacteriales    |
| Bacteroidetes  | Sphingobacteriia         | Sphingobacteriales  |
| Chlamydiae     | Chlamydiia               | Chlamydiales        |
| Cyanobacteria  | Nostocophycideae         | Nostocales          |
| Cyanobacteria  | Oscillatoriohaptophyceae | Oscillatoriales     |

[illegible]

[illegible]

[illegible]

|                |                       |                     |
|----------------|-----------------------|---------------------|
| Proteobacteria | Betaproteobacteria    | Burkholderiales     |
| Proteobacteria | Betaproteobacteria    | Hydrogenophilaes    |
| Proteobacteria | Betaproteobacteria    | Neisseriales        |
| Proteobacteria | Betaproteobacteria    | Neisseriales        |
| Proteobacteria | Betaproteobacteria    | Rhodocyclales       |
| Proteobacteria | Betaproteobacteria    | Rhodocyclales       |
| Proteobacteria | Betaproteobacteria    | Rhodocyclales       |
| Proteobacteria | Deltaproteobacteria   | Desulfobacterales   |
| Proteobacteria | Deltaproteobacteria   | Desulfovibrionales  |
| Proteobacteria | Deltaproteobacteria   | Desulfuromonadales  |
| Proteobacteria | Deltaproteobacteria   | Desulfuromonadales  |
| Proteobacteria | Deltaproteobacteria   | Syntrophobacterales |
| Proteobacteria | Deltaproteobacteria   | Syntrophobacterales |
| Proteobacteria | Epsilonproteobacteria | Campylobacterales   |
| Proteobacteria | Gammaproteobacteria   | Aeromonadales       |
| Proteobacteria | Gammaproteobacteria   | Aeromonadales       |
| Proteobacteria | Gammaproteobacteria   | Alteromonadales     |
| Proteobacteria | Gammaproteobacteria   | Chromatiales        |
| Proteobacteria | Gammaproteobacteria   | Chromatiales        |
| Proteobacteria | Gammaproteobacteria   | Enterobacterales    |

[illegible]

|                |                     |                   |
|----------------|---------------------|-------------------|
| Proteobacteria | Gammaproteobacteria | Pseudomonadales   |
| Proteobacteria | Gammaproteobacteria | Thiotrichales     |
| Proteobacteria | Gammaproteobacteria | Thiotrichales     |
| Proteobacteria | Gammaproteobacteria | Thiotrichales     |
| Proteobacteria | Gammaproteobacteria | Vibrionales       |
| Proteobacteria | Gammaproteobacteria | Vibrionales       |
| Proteobacteria | Gammaproteobacteria | Xanthomonadales   |
| Proteobacteria | Gammaproteobacteria | Xanthomonadales   |
| Spirochaetes   | Spirochaetia        | Spirochaetales    |
| Tenericutes    | Mollicutes          | Acholeplasmatales |
| Actinobacteria | Actinobacteria      | Actinomycetales   |
| Firmicutes     | Bacilli             | Bacillales        |
| Firmicutes     | Bacilli             | Bacillales        |
| Firmicutes     | Bacilli             | Bacillales        |
| Firmicutes     | Bacilli             | Lactobacillales   |
| Firmicutes     | Bacilli             | Lactobacillales   |
| Firmicutes     | Clostridia          | Clostridiales     |
| Firmicutes     | Clostridia          | Clostridiales     |
| Firmicutes     | Clostridia          | Clostridiales     |
| Proteobacteria | Alphaproteobacteria | Rhodobacterales   |
| Proteobacteria | Alphaproteobacteria | Sphingomonadales  |
| Proteobacteria | Betaproteobacteria  | Burkholderiales   |



[illegible]

[illegible]

[illegible]

|                |                       |                   |
|----------------|-----------------------|-------------------|
| Firmicutes     | Bacilli               | Lactobacillales   |
| Firmicutes     | Bacilli               | Lactobacillales   |
| Firmicutes     | Bacilli               | Lactobacillales   |
| Firmicutes     | Clostridia            | Clostridiales     |
| Firmicutes     | Negativicutes         | Selenomonadales   |
| Proteobacteria | Alphaproteobacteria   | Caulobacterales   |
| Proteobacteria | Alphaproteobacteria   | Caulobacterales   |
| Proteobacteria | Alphaproteobacteria   | Caulobacterales   |
| Proteobacteria | Alphaproteobacteria   | Rhizobiales       |
| Proteobacteria | Alphaproteobacteria   | Rhizobiales       |
| Proteobacteria | Alphaproteobacteria   | Rhodobacterales   |
| Proteobacteria | Betaproteobacteria    | Burkholderiales   |
| Proteobacteria | Betaproteobacteria    | Hydrogenophilales |
| Proteobacteria | Betaproteobacteria    | Neisseriales      |
| Proteobacteria | Betaproteobacteria    | Neisseriales      |
| Proteobacteria | Epsilonproteobacteria | Campylobacterales |
| Proteobacteria | Gammaproteobacteria   | Pasteurellales    |
| Proteobacteria | Gammaproteobacteria   | Pseudomonadales   |
| Proteobacteria | Gammaproteobacteria   | Pseudomonadales   |
| Proteobacteria | Gammaproteobacteria   | Pseudomonadales   |
| Proteobacteria | Gammaproteobacteria   | Vibrionales       |
| Proteobacteria | Gammaproteobacteria   | Xanthomonadales   |
| Acidobacteria  | Holophagae            | Holophagales      |
| Actinobacteria | Actinobacteria        | Actinomycetales   |
| Actinobacteria | Actinobacteria        | Actinomycetales   |

[illegible]

[illegible]

|                |                     |                   |
|----------------|---------------------|-------------------|
| Fusobacteria   | Fusobacteriia       | Fusobacteriales   |
| Proteobacteria | Alphaproteobacteria | Rhizobiales       |
| Proteobacteria | Alphaproteobacteria | Rhodobacterales   |
| Proteobacteria | Alphaproteobacteria | Rhodobacterales   |
| Proteobacteria | Alphaproteobacteria | Sphingomonadales  |
| Proteobacteria | Betaproteobacteria  | Burkholderiales   |
| Proteobacteria | Betaproteobacteria  | Neisseriales      |
| Proteobacteria | Betaproteobacteria  | Nitrosomonadales  |
| Proteobacteria | Deltaproteobacteria | Myxococcales      |
| Proteobacteria | Gammaproteobacteria | Aeromonadales     |
| Proteobacteria | Gammaproteobacteria | Alteromonadales   |
| Proteobacteria | Gammaproteobacteria | Arenicellales     |
| Proteobacteria | Gammaproteobacteria | Chromatiales      |
| Proteobacteria | Gammaproteobacteria | Enterobacteriales |
| Proteobacteria | Gammaproteobacteria | Enterobacteriales |
| Proteobacteria | Gammaproteobacteria | Legionellales     |
| Proteobacteria | Gammaproteobacteria | Oceanospirillales |
| Proteobacteria | Gammaproteobacteria | Oceanospirillales |
| Proteobacteria | Gammaproteobacteria | Oceanospirillales |
| Proteobacteria | Gammaproteobacteria | Pseudomonadales   |





[illegible]

|                |                     |                                 |
|----------------|---------------------|---------------------------------|
| Proteobacteria | Alphaproteobacteria | Rhodobacterales                 |
| Proteobacteria | Alphaproteobacteria | Rhodospirillales                |
| Proteobacteria | Alphaproteobacteria | Rickettsiales                   |
| Proteobacteria | Alphaproteobacteria | unclassifiedAlphaproteobacteria |
| Proteobacteria | Betaproteobacteria  | Hydrogenophilales               |
| Proteobacteria | Betaproteobacteria  | Neisseriales                    |
| Proteobacteria | Deltaproteobacteria | Desulfovibrionales              |
| Proteobacteria | Deltaproteobacteria | Myxococcales                    |
| Proteobacteria | Gammaproteobacteria | Enterobacteriales               |
| Proteobacteria | Gammaproteobacteria | Enterobacteriales               |
| Proteobacteria | Gammaproteobacteria | Enterobacteriales               |
| Proteobacteria | Gammaproteobacteria | Xanthomonadales                 |
| Actinobacteria | Actinobacteria      | Actinomycetales                 |
| Bacteroidetes  | Sphingobacteriia    | Sphingobacteriales              |
| Firmicutes     | Bacilli             | Lactobacillales                 |
| Proteobacteria | Deltaproteobacteria | Myxococcales                    |
| Proteobacteria | Gammaproteobacteria | Enterobacteriales               |
| Proteobacteria | Gammaproteobacteria | Enterobacteriales               |
| Proteobacteria | Gammaproteobacteria | Pseudomonadales                 |
| Proteobacteria | Gammaproteobacteria | Xanthomonadales                 |
| Actinobacteria | Actinobacteria      | Coriobacteriales                |
| Bacteroidetes  | Cytophagia          | Cytophagales                    |
| Bacteroidetes  | Flavobacteriia      | Flavobacteriales                |
| Chloroflexi    | Ardenticatenia      | Ardenticatenales                |
| Firmicutes     | Bacilli             | Bacillales                      |
| Firmicutes     | Bacilli             | Bacillales                      |
| Proteobacteria | Alphaproteobacteria | Rhizobiales                     |
| Proteobacteria | Alphaproteobacteria | Rhizobiales                     |
| Proteobacteria | Alphaproteobacteria | Rhodobacterales                 |
| Proteobacteria | Alphaproteobacteria | Sphingomonadales                |
| Proteobacteria | Alphaproteobacteria | Sphingomonadales                |
| Proteobacteria | Alphaproteobacteria | Sphingomonadales                |
| Proteobacteria | Betaproteobacteria  | Burkholderiales                 |
| Proteobacteria | Betaproteobacteria  | Burkholderiales                 |
| Proteobacteria | Betaproteobacteria  | Hydrogenophilales               |

|                 |                     |                     |
|-----------------|---------------------|---------------------|
| Proteobacteria  | Deltaproteobacteria | Myxococcales        |
| Proteobacteria  | Gammaproteobacteria | Chromatiales        |
| Proteobacteria  | Gammaproteobacteria | Enterobacteriales   |
| Proteobacteria  | Gammaproteobacteria | Oceanospirillales   |
| Proteobacteria  | Gammaproteobacteria | Pseudomonadales     |
| Proteobacteria  | Gammaproteobacteria | Pseudomonadales     |
| Proteobacteria  | Gammaproteobacteria | Thiotrichales       |
| Proteobacteria  | Gammaproteobacteria | Xanthomonadales     |
| Proteobacteria  | Gammaproteobacteria | Xanthomonadales     |
| Verrucomicrobia | Opitutae            | Opitutales          |
| Actinobacteria  | Actinobacteria      | Actinomycetales     |
| Actinobacteria  | Actinobacteria      | Solirubrobacterales |
| Bacteroidetes   | Cytophagia          | Cytophagales        |
| Bacteroidetes   | Flavobacteriia      | Flavobacteriales    |
| Chlamydiae      | Chlamydiia          | Chlamydiales        |
| Firmicutes      | Bacilli             | Bacillales          |
| Firmicutes      | Bacilli             | Bacillales          |
| Firmicutes      | Bacilli             | Bacillales          |
| Firmicutes      | Bacilli             | Lactobacillales     |
| Proteobacteria  | Alphaproteobacteria | Rhizobiales         |
| Proteobacteria  | Alphaproteobacteria | Sphingomonadales    |
| Proteobacteria  | Alphaproteobacteria | Sphingomonadales    |
| Proteobacteria  | Alphaproteobacteria | Sphingomonadales    |
| Proteobacteria  | Betaproteobacteria  | Burkholderiales     |
| Proteobacteria  | Betaproteobacteria  | Burkholderiales     |
| Proteobacteria  | Betaproteobacteria  | Burkholderiales     |



[illegible]

|                 |                       |                    |
|-----------------|-----------------------|--------------------|
| Proteobacteria  | Betaproteobacteria    | Hydrogenophilales  |
| Proteobacteria  | Betaproteobacteria    | Methylophilales    |
| Proteobacteria  | Betaproteobacteria    | Methylophilales    |
| Proteobacteria  | Betaproteobacteria    | Rhodocyclales      |
| Proteobacteria  | Betaproteobacteria    | Rhodocyclales      |
| Proteobacteria  | Deltaproteobacteria   | Desulfuromonadales |
| Proteobacteria  | Deltaproteobacteria   | Desulfuromonadales |
| Proteobacteria  | Deltaproteobacteria   | Myxococcales       |
| Proteobacteria  | Deltaproteobacteria   | Myxococcales       |
| Proteobacteria  | Deltaproteobacteria   | Myxococcales       |
| Proteobacteria  | Gammaproteobacteria   | Alteromonadales    |
| Proteobacteria  | Gammaproteobacteria   | Alteromonadales    |
| Proteobacteria  | Gammaproteobacteria   | Enterobacteriales  |
| Proteobacteria  | Gammaproteobacteria   | Enterobacteriales  |
| Proteobacteria  | Gammaproteobacteria   | Enterobacteriales  |
| Proteobacteria  | Gammaproteobacteria   | Xanthomonadales    |
| Proteobacteria  | Gammaproteobacteria   | Xanthomonadales    |
| Verrucomicrobia | Spartobacteria        | Spartobacteria     |
| Actinobacteria  | Actinobacteria        | Actinomycetales    |
| Actinobacteria  | Actinobacteria        | Actinomycetales    |
| Bacteroidetes   | Bacteroidia           | Bacteroidales      |
| Bacteroidetes   | Flavobacteriia        | Flavobacteriales   |
| Bacteroidetes   | Flavobacteriia        | Flavobacteriales   |
| Bacteroidetes   | Flavobacteriia        | Flavobacteriales   |
| Firmicutes      | Clostridia            | Clostridiales      |
| Firmicutes      | Clostridia            | Clostridiales      |
| Lentisphaerae   | Oligosphaeria         | Oligosphaerales    |
| Proteobacteria  | Betaproteobacteria    | Burkholderiales    |
| Proteobacteria  | Betaproteobacteria    | Burkholderiales    |
| Proteobacteria  | Betaproteobacteria    | Rhodocyclales      |
| Proteobacteria  | Epsilonproteobacteria | Campylobacterales  |
| Proteobacteria  | Gammaproteobacteria   | Oceanospirillales  |
| Proteobacteria  | Gammaproteobacteria   | Thiotrichales      |
| Proteobacteria  | Gammaproteobacteria   | Xanthomonadales    |
| Proteobacteria  | Gammaproteobacteria   | Xanthomonadales    |
| Actinobacteria  | Actinobacteria        | Actinomycetales    |
| Proteobacteria  | Alphaproteobacteria   | Rhizobiales        |
| Proteobacteria  | Alphaproteobacteria   | Rhodobacterales    |
| Proteobacteria  | Betaproteobacteria    | Methylophilales    |
| Proteobacteria  | Deltaproteobacteria   | Desulfovibrionales |
| Proteobacteria  | Gammaproteobacteria   | Cardiobacteriales  |
| Proteobacteria  | Gammaproteobacteria   | Xanthomonadales    |
| Proteobacteria  | Gammaproteobacteria   | Xanthomonadales    |

[illegible]

[illegible]



|                |                       |                    |
|----------------|-----------------------|--------------------|
| Actinobacteria | Actinobacteria        | Actinomycetales    |
| Aquificae      | Aquificae             | Aquificales        |
| Bacteroidetes  | Cytophagia            | Cytophagales       |
| Bacteroidetes  | Flavobacteriia        | Flavobacteriales   |
| Bacteroidetes  | Sphingobacteriia      | Sphingobacteriales |
| Cyanobacteria  | Synechococcophycideae | Pseudanabaenales   |
| Firmicutes     | Bacilli               | Bacillales         |
| Firmicutes     | Bacilli               | Lactobacillales    |
| Firmicutes     | Clostridia            | Clostridiales      |
| Firmicutes     | Clostridia            | Clostridiales      |
| Firmicutes     | Erysipelotrichia      | Erysipelotrichales |
| Proteobacteria | Alphaproteobacteria   | Caulobacterales    |
| Proteobacteria | Alphaproteobacteria   | Rhizobiales        |
| Proteobacteria | Alphaproteobacteria   | Rhizobiales        |
| Proteobacteria | Alphaproteobacteria   | Rhodobacterales    |

|                |                       |                   |
|----------------|-----------------------|-------------------|
| Proteobacteria | Betaproteobacteria    | Burkholderiales   |
| Proteobacteria | Betaproteobacteria    | Burkholderiales   |
| Proteobacteria | Betaproteobacteria    | Methylophilales   |
| Proteobacteria | Betaproteobacteria    | Methylophilales   |
| Proteobacteria | Betaproteobacteria    | Neisseriales      |
| Proteobacteria | Betaproteobacteria    | Rhodocyclales     |
| Proteobacteria | Betaproteobacteria    | Rhodocyclales     |
| Proteobacteria | Deltaproteobacteria   | Bdellovibrionales |
| Proteobacteria | Epsilonproteobacteria | Campylobacterales |
| Proteobacteria | Gammaproteobacteria   | Cardiobacteriales |
| Proteobacteria | Gammaproteobacteria   | Enterobacteriales |
| Proteobacteria | Gammaproteobacteria   | Enterobacteriales |
| Proteobacteria | Gammaproteobacteria   | Enterobacteriales |
| Proteobacteria | Gammaproteobacteria   | Legionellales     |
| Proteobacteria | Gammaproteobacteria   | Oceanospirillales |
| Proteobacteria | Gammaproteobacteria   | Pasteurellales    |
| Proteobacteria | Gammaproteobacteria   | Pseudomonadales   |
| Proteobacteria | Gammaproteobacteria   | Pseudomonadales   |
| Proteobacteria | Gammaproteobacteria   | Xanthomonadales   |
| Spirochaetes   | Spirochaetia          | Spirochaetales    |
| Spirochaetes   | Spirochaetia          | Spirochaetales    |
| Tenericutes    | Mollicutes            | Acholeplasmatales |
| Tenericutes    | Mollicutes            | Acholeplasmatales |
| Tenericutes    | Mollicutes            | Entomoplasmatales |
| Actinobacteria | Actinobacteria        | Actinomycetales   |

|                |                     |                    |
|----------------|---------------------|--------------------|
| Actinobacteria | Actinobacteria      | Actinomycetales    |
| Actinobacteria | Actinobacteria      | Coriobacteriales   |
| Bacteroidetes  | Bacteroidia         | Bacteroidales      |
| Bacteroidetes  | Flavobacteriia      | Flavobacteriales   |
| Bacteroidetes  | Sphingobacteriia    | Sphingobacteriales |
| Firmicutes     | Bacilli             | Bacillales         |
| Firmicutes     | Clostridia          | Clostridiales      |
| Firmicutes     | Clostridia          | Clostridiales      |
| Firmicutes     | Clostridia          | Clostridiales      |
| Proteobacteria | Alphaproteobacteria | Rhizobiales        |
| Proteobacteria | Alphaproteobacteria | Rhodobacterales    |
| Proteobacteria | Alphaproteobacteria | Rhodobacterales    |
| Proteobacteria | Alphaproteobacteria | Rhodospirillales   |
| Proteobacteria | Alphaproteobacteria | Rickettsiales      |
| Proteobacteria | Betaproteobacteria  | Burkholderiales    |
| Proteobacteria | Betaproteobacteria  | Burkholderiales    |
| Proteobacteria | Betaproteobacteria  | Burkholderiales    |
| Proteobacteria | Betaproteobacteria  | Methylophilales    |
| Proteobacteria | Betaproteobacteria  | Nitrosomonadales   |
| Proteobacteria | Betaproteobacteria  | Rhodocyclales      |
| Proteobacteria | Betaproteobacteria  | Rhodocyclales      |
| Proteobacteria | Betaproteobacteria  | Rhodocyclales      |
| Proteobacteria | Deltaproteobacteria | Myxococcales       |
| Proteobacteria | Gammaproteobacteria | Chromatiales       |
| Proteobacteria | Gammaproteobacteria | Enterobacteriales  |
| Proteobacteria | Gammaproteobacteria | Enterobacteriales  |
| Proteobacteria | Gammaproteobacteria | Enterobacteriales  |

[illegible]

[illegible]

|                |                     |                   |
|----------------|---------------------|-------------------|
| Proteobacteria | Betaproteobacteria  | Burkholderiales   |
| Proteobacteria | Betaproteobacteria  | Gallionellales    |
| Proteobacteria | Deltaproteobacteria | Myxococcales      |
| Proteobacteria | Gammaproteobacteria | Enterobacteriales |
| Proteobacteria | Gammaproteobacteria | Legionellales     |
| Proteobacteria | Gammaproteobacteria | Oceanospirillales |
| Proteobacteria | Gammaproteobacteria | Pseudomonadales   |
| Proteobacteria | Gammaproteobacteria | Pseudomonadales   |
| Proteobacteria | Gammaproteobacteria | Xanthomonadales   |
| Proteobacteria | Gammaproteobacteria | Xanthomonadales   |
| Actinobacteria | Actinobacteria      | Actinomycetales   |
| Proteobacteria | Alphaproteobacteria | Rhizobiales       |
| Proteobacteria | Alphaproteobacteria | Rhizobiales       |
| Proteobacteria | Alphaproteobacteria | Rhizobiales       |
| Proteobacteria | Alphaproteobacteria | Sphingomonadales  |
| Proteobacteria | Betaproteobacteria  | Burkholderiales   |
| Proteobacteria | Gammaproteobacteria | Enterobacteriales |
| Proteobacteria | Gammaproteobacteria | Pseudomonadales   |
| Actinobacteria | Actinobacteria      | Actinomycetales   |
| Actinobacteria | Actinobacteria      | Actinomycetales   |
| Actinobacteria | Actinobacteria      | Actinomycetales   |
| Bacteroidetes  | Flavobacteriia      | Flavobacteriales  |
| Firmicutes     | Bacilli             | Bacillales        |
| Firmicutes     | Bacilli             | Bacillales        |
| Proteobacteria | Alphaproteobacteria | Rhizobiales       |
| Proteobacteria | Alphaproteobacteria | Rhodobacterales   |
| Proteobacteria | Betaproteobacteria  | Burkholderiales   |
| Actinobacteria | Actinobacteria      | Actinomycetales   |
| Actinobacteria | Actinobacteria      | Actinomycetales   |
| Firmicutes     | Bacilli             | Bacillales        |
| Proteobacteria | Gammaproteobacteria | Enterobacteriales |
| Actinobacteria | Actinobacteria      | Actinomycetales   |
| Actinobacteria | Actinobacteria      | Actinomycetales   |
| Actinobacteria | Actinobacteria      | Actinomycetales   |
| Cyanobacteria  | Prochlorales        | Prochlorales      |
| Proteobacteria | Alphaproteobacteria | Rhodobacterales   |

|                 |                     |                    |
|-----------------|---------------------|--------------------|
| Proteobacteria  | Alphaproteobacteria | Rhodobacterales    |
| Proteobacteria  | Betaproteobacteria  | Burkholderiales    |
| Proteobacteria  | Deltaproteobacteria | Desulfurellales    |
| Proteobacteria  | Deltaproteobacteria | Myxococcales       |
| Proteobacteria  | Deltaproteobacteria | Myxococcales       |
| Proteobacteria  | Gammaproteobacteria | Xanthomonadales    |
| Actinobacteria  | Actinobacteria      | Actinomycetales    |
| Bacteroidetes   | Flavobacteriia      | Flavobacteriales   |
| Bacteroidetes   | Flavobacteriia      | Flavobacteriales   |
| Chlamydiae      | Chlamydiia          | Chlamydiales       |
| Chlorobi        | Chlorobia           | Chlorobiales       |
| Firmicutes      | Clostridia          | Clostridiales      |
| Fusobacteria    | Fusobacteriia       | Fusobacteriales    |
| Proteobacteria  | Alphaproteobacteria | Caulobacterales    |
| Proteobacteria  | Alphaproteobacteria | Rhizobiales        |
| Proteobacteria  | Alphaproteobacteria | Sphingomonadales   |
| Proteobacteria  | Alphaproteobacteria | Sphingomonadales   |
| Proteobacteria  | Deltaproteobacteria | Desulfovibrionales |
| Proteobacteria  | Deltaproteobacteria | Myxococcales       |
| Proteobacteria  | Gammaproteobacteria | Pseudomonadales    |
| Proteobacteria  | Gammaproteobacteria | Xanthomonadales    |
| Verrucomicrobia | Verrucomicrobiae    | Verrucomicrobiales |
| Actinobacteria  | Actinobacteria      | Actinomycetales    |
| Bacteroidetes   | Sphingobacteriia    | Sphingobacteriales |
| Bacteroidetes   | Sphingobacteriia    | Sphingobacteriales |
| Proteobacteria  | Alphaproteobacteria | Sphingomonadales   |
| Proteobacteria  | Betaproteobacteria  | Hydrogenophilales  |
| Proteobacteria  | Gammaproteobacteria | Alteromonadales    |
| Proteobacteria  | Gammaproteobacteria | Alteromonadales    |
| Proteobacteria  | Gammaproteobacteria | Oceanospirillales  |
| Firmicutes      | Clostridia          | Clostridiales      |

[illegible]



[illegible]

|                 |                     |                    |
|-----------------|---------------------|--------------------|
| Proteobacteria  | Alphaproteobacteria | Rhodobacterales    |
| Proteobacteria  | Alphaproteobacteria | Sneathiellales     |
| Proteobacteria  | Alphaproteobacteria | Sphingomonadales   |
| Proteobacteria  | Betaproteobacteria  | Burkholderiales    |
| Proteobacteria  | Betaproteobacteria  | Methylophilales    |
| Proteobacteria  | Deltaproteobacteria | Bdellovibrionales  |
| Proteobacteria  | Deltaproteobacteria | Bdellovibrionales  |
| Proteobacteria  | Deltaproteobacteria | Desulfovibrionales |
| Proteobacteria  | Deltaproteobacteria | Myxococcales       |
| Proteobacteria  | Deltaproteobacteria | Myxococcales       |
| Proteobacteria  | Deltaproteobacteria | Myxococcales       |
| Proteobacteria  | Gammaproteobacteria | Chromatiales       |
| Proteobacteria  | Gammaproteobacteria | Chromatiales       |
| Proteobacteria  | Gammaproteobacteria | Legionellales      |
| Proteobacteria  | Gammaproteobacteria | Oceanospirillales  |
| Proteobacteria  | Gammaproteobacteria | Pseudomonadales    |
| Proteobacteria  | Gammaproteobacteria | Salinisphaerales   |
| Proteobacteria  | Gammaproteobacteria | Xanthomonadales    |
| Tenericutes     | Mollicutes          | Acholeplasmatales  |
| Tenericutes     | Mollicutes          | Acholeplasmatales  |
| Tenericutes     | Mollicutes          | Acholeplasmatales  |
| Verrucomicrobia | Opitutae            | Opitutales         |
| Actinobacteria  | Actinobacteria      | Actinomycetales    |
| Actinobacteria  | Actinobacteria      | Actinomycetales    |
| Bacteroidetes   | Flavobacteriia      | Flavobacteriales   |
| Proteobacteria  | Betaproteobacteria  | Burkholderiales    |
| Proteobacteria  | Deltaproteobacteria | Bdellovibrionales  |
| Proteobacteria  | Deltaproteobacteria | Bdellovibrionales  |
| Proteobacteria  | Gammaproteobacteria | Pseudomonadales    |
| Actinobacteria  | Actinobacteria      | Actinomycetales    |
| Actinobacteria  | Actinobacteria      | Actinomycetales    |
| Bacteroidetes   | Flavobacteriia      | Flavobacteriales   |
| Firmicutes      | Bacilli             | Bacillales         |
| Firmicutes      | Bacilli             | Lactobacillales    |
| Proteobacteria  | Alphaproteobacteria | Rhizobiales        |
| Proteobacteria  | Alphaproteobacteria | Rhizobiales        |
| Proteobacteria  | Alphaproteobacteria | Rhizobiales        |
| Proteobacteria  | Alphaproteobacteria | Rhodobacterales    |
| Proteobacteria  | Betaproteobacteria  | Burkholderiales    |
| Proteobacteria  | Betaproteobacteria  | Burkholderiales    |
| Proteobacteria  | Betaproteobacteria  | Burkholderiales    |
| Proteobacteria  | Gammaproteobacteria | Aeromonadales      |
| Proteobacteria  | Gammaproteobacteria | Aeromonadales      |

|                |                       |                    |
|----------------|-----------------------|--------------------|
| Proteobacteria | Gammaproteobacteria   | Enterobacteriales  |
| Proteobacteria | Gammaproteobacteria   | Thiotrichales      |
| Proteobacteria | Gammaproteobacteria   | Xanthomonadales    |
| Proteobacteria | Gammaproteobacteria   | Xanthomonadales    |
| Actinobacteria | Actinobacteria        | Actinomycetales    |
| Actinobacteria | Actinobacteria        | Actinomycetales    |
| Firmicutes     | Clostridia            | Clostridiales      |
| Firmicutes     | Clostridia            | Clostridiales      |
| Proteobacteria | Alphaproteobacteria   | Rhizobiales        |
| Proteobacteria | Alphaproteobacteria   | Rhodospirillales   |
| Proteobacteria | Epsilonproteobacteria | Campylobacterales  |
| Proteobacteria | Gammaproteobacteria   | Enterobacteriales  |
| Acidobacteria  | Acidobacteriia        | Acidobacteriales   |
| Acidobacteria  | Acidobacteriia        | Acidobacteriales   |
| Acidobacteria  | Acidobacteriia        | Acidobacteriales   |
| Actinobacteria | Actinobacteria        | Actinomycetales    |
| Actinobacteria | Actinobacteria        | Actinomycetales    |
| Bacteroidetes  | Sphingobacteriia      | Sphingobacteriales |
| Proteobacteria | Betaproteobacteria    | Burkholderiales    |
| Proteobacteria | Betaproteobacteria    | Nitrosomonadales   |
| Bacteroidetes  | Flavobacteriia        | Flavobacteriales   |
| Proteobacteria | Alphaproteobacteria   | Caulobacterales    |
| Actinobacteria | Actinobacteria        | Actinomycetales    |
| Actinobacteria | Actinobacteria        | Actinomycetales    |
| Bacteroidetes  | Flavobacteriia        | Flavobacteriales   |
| Bacteroidetes  | Sphingobacteriia      | Sphingobacteriales |
| Cyanobacteria  | Oscillatoriophyceae   | Oscillatoriales    |
| Firmicutes     | Bacilli               | Lactobacillales    |
| Proteobacteria | Alphaproteobacteria   | Rhizobiales        |
| Proteobacteria | Alphaproteobacteria   | Rhodobacterales    |
| Proteobacteria | Alphaproteobacteria   | Rickettsiales      |
| Proteobacteria | Betaproteobacteria    | Burkholderiales    |
| Actinobacteria | Actinobacteria        | Actinomycetales    |
| Actinobacteria | Actinobacteria        | Actinomycetales    |
| Actinobacteria | Actinobacteria        | Actinomycetales    |
| Bacteroidetes  | Cytophagia            | Cytophagales       |
| Bacteroidetes  | Sphingobacteriia      | Sphingobacteriales |
| Firmicutes     | Bacilli               | Bacillales         |
| Firmicutes     | Bacilli               | Bacillales         |
| Firmicutes     | Bacilli               | Bacillales         |
| Proteobacteria | Alphaproteobacteria   | Rhodobacterales    |
| Proteobacteria | Alphaproteobacteria   | Rhodospirillales   |
| Proteobacteria | Alphaproteobacteria   | Sphingomonadales   |
| Proteobacteria | Betaproteobacteria    | Rhodocyclales      |
| Proteobacteria | Gammaproteobacteria   | Enterobacteriales  |
| Bacteroidetes  | Sphingobacteriia      | Sphingobacteriales |

|                |                       |                                 |
|----------------|-----------------------|---------------------------------|
| Proteobacteria | Betaproteobacteria    | Burkholderiales                 |
| Proteobacteria | Gammaproteobacteria   | Enterobacteriales               |
| Actinobacteria | Actinobacteria        | Actinomycetales                 |
| Bacteroidetes  | Bacteroidia           | Bacteroidales                   |
| Proteobacteria | Alphaproteobacteria   | Rhizobiales                     |
| Proteobacteria | Alphaproteobacteria   | Rhizobiales                     |
| Proteobacteria | Alphaproteobacteria   | Rhizobiales                     |
| Proteobacteria | Alphaproteobacteria   | Rhodobacterales                 |
| Proteobacteria | Alphaproteobacteria   | Rhodospirillales                |
| Proteobacteria | Betaproteobacteria    | Burkholderiales                 |
| Proteobacteria | Betaproteobacteria    | Nitrosomonadales                |
| Proteobacteria | Gammaproteobacteria   | Xanthomonadales                 |
| Actinobacteria | Actinobacteria        | Actinomycetales                 |
| Bacteroidetes  | Cytophagia            | Cytophagales                    |
| Bacteroidetes  | Cytophagia            | Cytophagales                    |
| Bacteroidetes  | Flavobacteriia        | Flavobacteriales                |
| Firmicutes     | Bacilli               | Bacillales                      |
| Proteobacteria | Alphaproteobacteria   | Rhizobiales                     |
| Proteobacteria | Alphaproteobacteria   | Rhizobiales                     |
| Proteobacteria | Epsilonproteobacteria | Campylobacterales               |
| Proteobacteria | Gammaproteobacteria   | Enterobacteriales               |
| Proteobacteria | Gammaproteobacteria   | Legionellales                   |
| Proteobacteria | Gammaproteobacteria   | Pseudomonadales                 |
| Proteobacteria | Gammaproteobacteria   | Xanthomonadales                 |
| Proteobacteria | Gammaproteobacteria   | unclassifiedGammaproteobacteria |
| Actinobacteria | Actinobacteria        | Actinomycetales                 |
| Bacteroidetes  | Flavobacteriia        | Flavobacteriales                |
| Bacteroidetes  | Flavobacteriia        | Flavobacteriales                |
| Firmicutes     | Bacilli               | Bacillales                      |
| Proteobacteria | Alphaproteobacteria   | Rhizobiales                     |
| Proteobacteria | Alphaproteobacteria   | Rhizobiales                     |
| Proteobacteria | Alphaproteobacteria   | Rhizobiales                     |

|                |                     |                   |
|----------------|---------------------|-------------------|
| Proteobacteria | Alphaproteobacteria | Rhodobacterales   |
| Proteobacteria | Betaproteobacteria  | Methylophilales   |
| Proteobacteria | Betaproteobacteria  | Sulfuricellales   |
| Proteobacteria | Gammaproteobacteria | Aeromonadales     |
| Proteobacteria | Gammaproteobacteria | Enterobacteriales |
| Proteobacteria | Gammaproteobacteria | Legionellales     |
| Proteobacteria | Gammaproteobacteria | Methylococcales   |
| Proteobacteria | Gammaproteobacteria | Pasteurellales    |
| Actinobacteria | Actinobacteria      | Actinomycetales   |
| Bacteroidetes  | Bacteroidia         | Bacteroidales     |
| Firmicutes     | Bacilli             | Bacillales        |
| Proteobacteria | Alphaproteobacteria | Rhodospirillales  |
| Proteobacteria | Betaproteobacteria  | Burkholderiales   |
| Proteobacteria | Gammaproteobacteria | Aeromonadales     |
| Proteobacteria | Gammaproteobacteria | Aeromonadales     |
| Actinobacteria | Actinobacteria      | Actinomycetales   |
| Actinobacteria | Actinobacteria      | Actinomycetales   |
| Proteobacteria | Gammaproteobacteria | Xanthomonadales   |

## Taxonomy

### Family

Acidobacteriaceae  
Microthrixaceae  
Acidimicrobiaceae  
Acidimicrobiaceae  
Acidimicrobiaceae  
Acidimicrobiaceae  
Iamiaceae  
Actinomycetaceae  
Beutenbergiaceae  
Beutenbergiaceae  
Beutenbergiaceae  
Beutenbergiaceae  
Bogoriellaceae  
Bogoriellaceae  
Bogoriellaceae  
Bogoriellaceae  
Brevibacteriaceae  
Brevibacteriaceae  
Brevibacteriaceae  
Cellulomonadaceae  
Cellulomonadaceae  
Cellulomonadaceae  
Cellulomonadaceae  
Cellulomonadaceae  
Corynebacteriaceae  
Demequinaceae  
Demequinaceae  
Demequinaceae  
Dermabacteraceae  
Dermabacteraceae  
Dermabacteraceae  
Dermabacteraceae  
Dermabacteraceae

[illegible]

Intrasporangiaceae  
Kineosporiaceae  
Microbacteriaceae  
Micrococcaceae  
Micrococcaceae  
Micrococcaceae  
Micrococcaceae



[illegible]

[illegible]

Flavobacteriaceae  
Chitinophagaceae  
Sphingobacteriaceae  
Waddliaceae  
Ardenscatenaceae  
Thermogemmatissporaceae  
Sphaerobacteraceae  
Gloeobacteraceae  
Nostocaceae  
Deinococcaceae  
Bacillaceae

Bacillaceae  
Bacillaceae  
Bacillaceae  
Bacillaceae  
Bacillaceae  
Bacillaceae  
Bacillaceae  
Bacillaceae  
Bacillaceae  
Bacillales incertae sedis  
Planococcaceae  
Staphylococcaceae  
Aerococcaceae  
Aerococcaceae  
Aerococcaceae  
Aerococcaceae  
Aerococcaceae  
Carnobacteriaceae  
Carnobacteriaceae  
Carnobacteriaceae  
Leuconostocaceae  
Streptococcaceae  
Streptococcaceae



[illegible]

[illegible]

[illegible]



Sphingomonadaceae  
Alcaligenaceae  
Alcaligenaceae  
Alcaligenaceae  
Alcaligenaceae  
Alcaligenaceae  
Alcaligenaceae  
Alcaligenaceae  
Alcaligenaceae  
Alcaligenaceae  
Burkholderiaceae  
Burkholderiaceae  
Comamonadaceae  
Comamonadaceae  
Comamonadaceae

Comamonadaceae  
Comamonadaceae  
Comamonadaceae  
Comamonadaceae  
Comamonadaceae  
Comamonadaceae  
Comamonadaceae  
Comamonadaceae  
Comamonadaceae  
Comamonadaceae  
Comamonadaceae  
Comamonadaceae  
Comamonadaceae  
Comamonadaceae  
Comamonadaceae  
Comamonadaceae  
Comamonadaceae  
Comamonadaceae  
Comamonadaceae  
Oxalobacteraceae  
unclassifiedBurkholderiales  
unclassifiedBurkholderiales  
unclassifiedBurkholderiales  
Neisseriaceae  
Neisseriaceae  
Rhodocyclaceae  
Bacteriovoracaceae  
Bacteriovoracaceae  
Bdellovibrionaceae  
Bdellovibrionaceae  
Bdellovibrionaceae  
Desulfobulbaceae  
Polyangiaceae  
Campylobacteraceae  
Alteromonadaceae  
Alteromonadaceae  
Alteromonadaceae  
Alteromonadalesgeneraincertaedis

[illegible]

[illegible]

Xanthomonadaceae  
unclassifiedGammaproteobacteria  
Brachyspiraceae  
Spirochaetaceae  
Acholeplasmataceae  
Acholeplasmataceae  
Acholeplasmataceae  
Mycoplasmataceae  
Puniceicoccaceae  
Verrucomicrobiaceae  
Solibacteraceae  
Beutenbergiaceae  
Brevibacteriaceae  
Brevibacteriaceae  
Brevibacteriaceae  
Brevibacteriaceae  
Brevibacteriaceae  
Brevibacteriaceae  
Cellulomonadaceae  
Cellulomonadaceae  
Corynebacteriaceae  
Corynebacteriaceae  
Corynebacteriaceae  
Corynebacteriaceae  
Corynebacteriaceae  
Corynebacteriaceae  
Corynebacteriaceae  
Corynebacteriaceae  
Corynebacteriaceae  
Demequinaceae  
Demequinaceae  
Dermacoccaceae  
Dietziaceae  
Dietziaceae  
Frankiaceae  
Geodermatophilaceae  
Gordoniaceae  
Gordoniaceae  
Gordoniaceae  
Gordoniaceae  
Gordoniaceae  
Gordoniaceae  
Gordoniaceae  
Intrasporangiaceae  
Intrasporangiaceae  
Jonesiaceae

Pseudonocardiaceae

Pseudonocardiaceae  
Pseudonocardiaceae  
Pseudonocardiaceae  
Pseudonocardiaceae  
Pseudonocardiaceae  
Pseudonocardiaceae  
Sanguibacteraceae  
Streptomycetaceae  
Streptomycetaceae  
Streptomycetaceae  
Bifidobacteriaceae  
Patulibacteraceae  
Bacteroidaceae  
Bacteroidaceae  
Bacteroidaceae  
Porphyromonadaceae  
Porphyromonadaceae  
Porphyromonadaceae  
Prevotellaceae  
Prevotellaceae  
Prevotellaceae  
Prevotellaceae  
Prevotellaceae  
Cytophagaceae  
Cytophagaceae  
Cryomorphaceae  
Flavobacteriaceae  
Flavobacteriaceae  
Flavobacteriaceae  
Flavobacteriaceae  
Flavobacteriaceae  
Flavobacteriaceae  
Flavobacteriaceae  
Flavobacteriaceae  
Flavobacteriaceae  
Sphingobacteriaceae  
Sphingobacteriaceae  
Sphingobacteriaceae  
Sphingobacteriaceae  
Sphingobacteriaceae  
Sphingobacteriaceae  
Sphingobacteriaceae  
Sphingobacteriaceae  
Sphingobacteriaceae  
Criblamydiaceae  
Nostocaceae  
Phormidiaceae

[illegible]



Staphylococcaceae  
Staphylococcaceae  
Staphylococcaceae  
Staphylococcaceae  
Thermoactinomyetaceae  
Aerococcaceae  
Aerococcaceae  
Aerococcaceae  
Aerococcaceae  
Carnobacteriaceae  
Carnobacteriaceae  
Carnobacteriaceae  
Carnobacteriaceae  
Carnobacteriaceae  
Carnobacteriaceae  
Enterococcaceae  
Enterococcaceae  
Enterococcaceae  
Lactobacillaceae  
Lactobacillaceae  
Leuconostocaceae  
Streptococcaceae  
Streptococcaceae  
Streptococcaceae  
Streptococcaceae  
Clostridiaceae  
Clostridiaceae  
ClostridialesFamilyXI.IncertaeSedis  
Lachnospiraceae  
Lachnospiraceae  
Lachnospiraceae  
Lachnospiraceae  
Lachnospiraceae  
Peptoniphilaceae  
Peptoniphilaceae  
Peptoniphilaceae  
Peptoniphilaceae  
Peptoniphilaceae

Peptostreptococcaceae  
Ruminococcaceae  
Ruminococcaceae  
unclassifiedClostridiales  
Erysipelotrichaceae  
Veillonellaceae  
Nitrospiraceae  
Magnetococcaceae  
Aurantimonadaceae  
Bartonellaceae  
Hyphomicrobiaceae  
Hyphomicrobiaceae  
Phyllobacteriaceae  
Phyllobacteriaceae  
Phyllobacteriaceae  
Rhizobiaceae  
Rhizobiaceae  
Rhizobiaceae  
Xanthobacteraceae  
Xanthobacteraceae  
unclassifiedRhizobiales  
unclassifiedRhizobiales  
Rhodobacteraceae  
Rhodobacteraceae  
Rhodobacteraceae  
Rhodobacteraceae  
Rhodobacteraceae  
Rhodobacteraceae  
Sphingomonadaceae  
Sphingomonadaceae  
Sphingomonadaceae  
Sphingomonadaceae  
Sphingomonadaceae  
Sphingomonadaceae  
Alcaligenaceae  
Alcaligenaceae  
Alcaligenaceae  
Alcaligenaceae  
Alcaligenaceae  
Alcaligenaceae  
Alcaligenaceae  
Alcaligenaceae  
Burkholderiaceae  
Burkholderiaceae  
Comamonadaceae  
Comamonadaceae

Comamonadaceae  
Comamonadaceae  
Comamonadaceae  
Comamonadaceae  
Comamonadaceae  
Comamonadaceae  
Comamonadaceae  
Comamonadaceae  
Oxalobacteraceae  
Oxalobacteraceae  
Oxalobacteraceae  
Oxalobacteraceae  
Oxalobacteraceae  
Oxalobacteraceae  
Oxalobacteraceae  
Oxalobacteraceae  
Oxalobacteraceae  
Hydrogenophilaceae  
Neisseriaceae  
Neisseriaceae  
Rhodocyclaceae  
Rhodocyclaceae  
Rhodocyclaceae  
Desulfobacteraceae  
Desulfovibrionaceae  
Geobacteraceae  
Pelobacteraceae  
Syntrophaceae  
Syntrophobacteraceae  
Campylobacteraceae  
Campylobacteraceae  
Campylobacteraceae  
Campylobacteraceae  
Campylobacteraceae  
Helicobacteraceae  
Aeromonadaceae  
Aeromonadaceae  
Alteromonadaceae  
Alteromonadaceae  
Alteromonadaceae  
Alteromonadaceae  
Alteromonadalesgeneraincertaedis  
Idiomarinaceae  
Ectothiorhodospiraceae  
Halothiobacillaceae  
Enterobacteriaceae

[illegible]

[illegible]

Alcaligenaceae  
Comamonadaceae  
Acidithiobacillaceae  
Aeromonadaceae  
Alteromonadaceae  
Alteromonadaceae  
Idiomarinaceae  
Shewanellaceae  
Ectothiorhodospiraceae  
Enterobacteriaceae  
Halomonadaceae  
Pseudomonadaceae  
unclassifiedGammaproteobacteria  
Bogoriellaceae  
Corynebacteriaceae  
Dermabacteraceae  
Dietziaceae  
Dietziaceae  
Glycomycetaceae  
Intrasporangiaceae  
Intrasporangiaceae  
Intrasporangiaceae  
Microbacteriaceae  
Microbacteriaceae  
Microbacteriaceae  
Micrococcaceae  
Micrococcaceae  
Micrococcaceae  
Micrococcaceae  
Mycobacteriaceae  
Nakamurellaceae  
Nocardiaceae  
Nocardioidaceae  
Nocardiopsaceae  
Nocardiopsaceae  
Promicromonosporaceae  
Promicromonosporaceae  
Propionibacteriaceae  
Propionibacteriaceae  
Propionibacteriaceae  
Pseudonocardiaceae  
Ruaniaceae  
Ruaniaceae  
Streptomycetaceae  
Streptomycetaceae  
Cytophagaceae

Flavobacteriaceae  
Flavobacteriaceae  
Flavobacteriaceae  
Flavobacteriaceae  
Flavobacteriaceae  
Sphingobacteriaceae  
Bacillaceae  
Bacillaceae  
Bacillaceae  
Planococcaceae  
Aerococcaceae  
Carnobacteriaceae  
Carnobacteriaceae  
Enterococcaceae  
Enterococcaceae  
Enterococcaceae  
Leuconostocaceae  
Catabacteriaceae  
Eubacteriaceae  
Ruminococcaceae  
Leptotrichiaceae  
Rhodobacteraceae  
Rhodobacteraceae  
Rhodobacteraceae  
Sphingomonadaceae  
Sphingomonadaceae  
Campylobacteraceae  
Moraxellaceae  
Pseudomonadaceae  
Piscirickettsiaceae  
Piscirickettsiaceae  
Piscirickettsiaceae  
Xanthomonadaceae  
unclassifiedGammaproteobacteria  
Dethiosulfovibrionaceae  
Synergistaceae  
Synergistaceae  
Actinomycetaceae  
Actinomycetaceae  
Actinomycetaceae  
Actinomycetaceae  
Actinomycetaceae  
Corynebacteriaceae  
Corynebacteriaceae  
Corynebacteriaceae  
Corynebacteriaceae

Dermacoccaceae  
Dietziaceae  
Dietziaceae  
Microbacteriaceae  
Microbacteriaceae  
Microbacteriaceae  
Micrococcaceae  
Micrococcaceae  
Micrococcaceae  
Micrococcaceae  
Nocardiodaceae  
Nocardiopsaceae  
Propionibacteriaceae  
Pseudonocardiaceae  
Pseudonocardiaceae  
Patulibacteraceae  
Solirubrobacteraceae  
Porphyromonadaceae  
Prevotellaceae  
Sphingobacteriaceae  
Bacillaceae  
Bacillaceae  
Bacillalesincertaesedis  
Bacillalesincertaesedis  
Bacillalesincertaesedis  
Bacillalesincertaesedis  
Listeriaceae  
Paenibacillaceae  
Planococcaceae  
Planococcaceae  
Staphylococcaceae  
Staphylococcaceae  
Staphylococcaceae  
Staphylococcaceae  
Staphylococcaceae  
Thermoactinomycetaceae  
Aerococcaceae  
Carnobacteriaceae  
Lactobacillaceae  
Lactobacillaceae  
Lactobacillaceae  
Streptococcaceae  
Streptococcaceae  
Streptococcaceae  
Streptococcaceae  
Streptococcaceae



Streptococcaceae  
Streptococcaceae  
Streptococcaceae  
ClostridialesFamilyXI.IncertaeSedis  
ClostridialesFamilyXI.IncertaeSedis  
ClostridialesFamilyXI.IncertaeSedis  
ClostridialesFamilyXIII.IncertaeSedis  
ClostridialesFamilyXIII.IncertaeSedis  
Lachnospiraceae  
Lachnospiraceae  
Peptoniphilaceae  
Peptostreptococcaceae  
Peptostreptococcaceae  
Ruminococcaceae  
Ruminococcaceae  
Veillonellaceae  
Acidaminococcaceae  
Veillonellaceae  
Veillonellaceae  
Veillonellaceae  
Veillonellaceae  
Veillonellaceae  
Veillonellaceae  
Caulobacteraceae  
Caulobacteraceae  
Caulobacteraceae  
Hyphomicrobiaceae  
Methylobacteriaceae  
Rhodobacteraceae  
Alcaligenaceae  
Burkholderiaceae  
Oxalobacteraceae  
unclassifiedBurkholderiales  
Hydrogenophilaceae  
Neisseriaceae  
Neisseriaceae  
Campylobacteraceae  
Pasteurellaceae  
Moraxellaceae  
Moraxellaceae  
Moraxellaceae  
Vibrionaceae  
Xanthomonadaceae  
Holophagaceae  
Actinomycetaceae  
Actinomycetaceae

Actinomycetaceae  
Actinomycetaceae  
Bogoriellaceae  
Brevibacteriaceae  
Corynebacteriaceae  
Corynebacteriaceae  
Corynebacteriaceae  
Dermabacteraceae  
Geodermatophilaceae  
Intrasporangiaceae  
Kineosporiaceae  
Kineosporiaceae  
Kineosporiaceae  
Kineosporiaceae  
Kineosporiaceae  
Microbacteriaceae  
Microbacteriaceae  
Microbacteriaceae  
Microbacteriaceae  
Microbacteriaceae  
Microbacteriaceae  
Micrococcaceae  
Micrococcaceae  
Micrococcaceae  
Nocardiaceae  
Nocardiaceae  
Nocardiodaceae  
Nocardiodaceae  
Nocardiodaceae  
Nocardiodaceae  
Promicromonosporaceae  
Propionibacteriaceae  
Propionibacteriaceae  
Pseudonocardiaceae  
Pseudonocardiaceae  
Streptomyetaceae  
Gaiellaceae  
Bacteroidaceae  
Prevotellaceae  
Cytophagaceae  
Cytophagaceae  
Cytophagaceae  
Flavobacteriaceae  
Flavobacteriaceae  
Flavobacteriaceae  
Flavobacteriaceae

Flavobacteriaceae  
Saprospiraceae  
Sphingobacteriaceae  
Dehalococcoidaceae  
unclassifiedDehalococcoidia  
Fibrobacteraceae  
Fibrobacteraceae  
Fibrobacteraceae  
Bacillaceae  
Bacillaceae  
Bacillaceae  
Bacillaceae  
Bacillaceae  
Bacillaceae  
Paenibacillaceae  
Paenibacillaceae  
Planococcaceae  
Planococcaceae  
Planococcaceae  
Planococcaceae  
Staphylococcaceae  
Staphylococcaceae  
Thermoactinomycetaceae  
Thermoactinomycetaceae  
Aerococcaceae  
Aerococcaceae  
Aerococcaceae  
Carnobacteriaceae  
Enterococcaceae  
Enterococcaceae  
Leuconostocaceae  
Leuconostocaceae  
Streptococcaceae  
Christensenellaceae  
Eubacteriaceae  
Gracilibacteraceae  
Lachnospiraceae  
Lachnospiraceae  
Lachnospiraceae  
Lachnospiraceae  
Oscillospiraceae  
Peptoniphilaceae  
Proteinivoraceae  
Ruminococcaceae  
Ruminococcaceae  
Ruminococcaceae

Fusobacteriaceae  
Beijerinckiaceae  
Brucellaceae  
Brucellaceae  
Methylobacteriaceae  
Methylobacteriaceae  
Methylobacteriaceae  
Methylobacteriaceae  
Methylobacteriaceae  
Rhodobacteraceae  
Rhodobacteraceae  
Sphingomonadaceae  
Sphingomonadaceae  
Sphingomonadaceae  
Sphingomonadaceae  
Sphingomonadaceae  
Alcaligenaceae  
Alcaligenaceae  
Alcaligenaceae  
Alcaligenaceae  
Comamonadaceae  
Oxalobacteraceae  
Sutterellaceae  
Neisseriaceae  
Nitrosomonadaceae  
Myxococcaceae  
Succinivibrionaceae  
Idiomarinaceae  
Idiomarinaceae  
Pseudoalteromonadaceae  
Psychromonadaceae  
Shewanellaceae  
Arenicellaceae  
Chromatiaceae  
Chromatiaceae  
Chromatiaceae  
Chromatiaceae  
Chromatiaceae  
Thioalkalspiraceae  
Enterobacteriaceae  
Enterobacteriaceae  
Coxiellaceae  
Halomonadaceae  
Halomonadaceae  
Halomonadaceae  
Pseudomonadaceae

Thiotrichaceae  
Xanthomonadaceae  
Spirochaetaceae  
Acidimicrobiaceae  
Iamiaceae  
Acidothermaceae  
Actinomycetaceae  
Actinopolysporaceae  
Catenulisporaceae  
Geodermatophilaceae  
Intrasporangiaceae  
Intrasporangiaceae  
Jiangellaceae  
Microbacteriaceae  
Microbacteriaceae  
Microbacteriaceae  
Micromonosporaceae  
Mycobacteriaceae  
Nocardioideae  
Nocardioideae  
Nocardioideae  
Nocardioideae  
Nocardioideae  
Nocardiopsaceae  
Nocardiopsaceae  
Nocardiopsaceae  
Nocardiopsaceae  
Nocardiopsaceae  
Nocardiopsaceae  
Nocardiopsaceae  
Promicromonosporaceae  
Promicromonosporaceae  
Pseudonocardiaceae  
Pseudonocardiaceae  
Pseudonocardiaceae  
Pseudonocardiaceae  
Pseudonocardiaceae  
Pseudonocardiaceae  
Pseudonocardiaceae  
Pseudonocardiaceae  
Streptomycetaceae  
Streptomycetaceae  
Streptomycetaceae  
Streptomycetaceae  
Streptomycetaceae

Thermomonosporaceae  
Gaiellaceae  
Rubrobacteraceae  
Solirubrobacteraceae  
Marinilabiliaceae  
Rikenellaceae  
Flavobacteriaceae  
Flavobacteriaceae  
Rhabdochlamydiaceae  
Herpetosiphonaceae  
Bacillaceae  
Paenibacillaceae  
Paenibacillaceae  
Planococcaceae  
Thermoactinomycesaceae  
Thermoactinomycesaceae  
Thermoactinomycesaceae  
Thermoactinomycesaceae  
Thermoactinomycesaceae  
Enterococcaceae  
Leuconostocaceae  
Clostridiaceae  
ClostridialesFamilyXII.IncertaeSedis  
Eubacteriaceae  
Lachnospiraceae  
Ruminococcaceae  
Ruminococcaceae  
Ruminococcaceae  
Nitrospiraceae  
Bradyrhizobiaceae  
Bradyrhizobiaceae  
Bradyrhizobiaceae  
Hyphomicrobiaceae  
Phyllobacteriaceae  
Rhizobiaceae  
unclassifiedRhizobiales

Rhodobacteraceae  
Rhodospirillaceae  
Holosporaceae  
Geminicoccus  
Hydrogenophilaceae  
Chromobacteriaceae  
Desulfonatronumaceae  
Phaselicystidaceae  
Enterobacteriaceae  
Enterobacteriaceae  
Enterobacteriaceae  
Xanthomonadaceae  
Frankiaceae  
Glycomycetaceae  
Propionibacteriaceae  
Pseudonocardiaceae  
Sanguibacteraceae  
Streptomycetaceae  
Sphingobacteriaceae  
Lactobacillaceae  
Polyangiaceae  
Enterobacteriaceae  
Enterobacteriaceae  
Pseudomonadaceae  
Xanthomonadaceae  
Coriobacteriaceae  
Cytophagaceae  
Flavobacteriaceae  
Flavobacteriaceae  
Flavobacteriaceae  
Flavobacteriaceae  
Flavobacteriaceae  
Flavobacteriaceae  
Flavobacteriaceae  
Ardenticatenaceae  
Bacillaceae  
Paenibacillaceae  
Aurantimonadaceae  
Phyllobacteriaceae  
Rhodobacteraceae  
Sphingomonadaceae  
Sphingomonadaceae  
Sphingomonadaceae  
Oxalobacteraceae  
unclassifiedBurkholderiales  
Hydrogenophilaceae

Sandaracinaceae  
Chromatiaceae  
Enterobacteriaceae  
Enterobacteriaceae  
Enterobacteriaceae  
Enterobacteriaceae  
Oceanospirillaceae  
Pseudomonadaceae  
Pseudomonadaceae  
Piscirickettsiaceae  
Sinobacteraceae  
Xanthomonadaceae  
Opitutaceae  
Geodermatophilaceae  
Kineosporiaceae  
Microbacteriaceae  
Microbacteriaceae  
Micrococcaceae  
Micrococcaceae  
Promicromonosporaceae  
Sporichthyaceae  
Patulibacteraceae  
Cytophagaceae  
Cryomorphaceae  
Flavobacteriaceae  
Flavobacteriaceae  
Flavobacteriaceae  
Flavobacteriaceae  
Flavobacteriaceae  
Flavobacteriaceae  
Rhabdochlamydiaceae  
Paenibacillaceae  
Staphylococcaceae  
Thermoactinomycetaceae  
Carnobacteriaceae  
Aurantimonadaceae  
Bradyrhizobiaceae  
Brucellaceae  
Brucellaceae  
Phyllobacteriaceae  
Sphingomonadaceae  
Sphingomonadaceae  
Sphingomonadaceae  
Alcaligenaceae  
Alcaligenaceae  
Alcaligenaceae



Comamonadaceae  
Comamonadaceae  
Comamonadaceae  
Comamonadaceae  
Oxalobacteraceae  
Oxalobacteraceae  
Bacteriovoracaceae  
Cystobacteraceae  
Alteromonadaceae  
Alteromonadalesgeneraincertaedis  
Enterobacteriaceae  
Legionellaceae  
Halomonadaceae  
Halomonadaceae  
Halomonadaceae  
Pseudomonadaceae  
Pseudomonadaceae  
Pseudomonadaceae  
Pseudomonadaceae  
Pseudomonadaceae  
Vibrionaceae  
Xanthomonadaceae  
Xanthomonadaceae  
Bryobacter  
lamiaceae  
Catenulisporaceae  
Cryptosporangiaceae  
Geodermatophilaceae  
Geodermatophilaceae  
Intrasporangiaceae  
Intrasporangiaceae  
Jiangellaceae  
Kineosporiaceae  
Microbacteriaceae  
Micrococcaceae  
Micromonosporaceae  
Nakamurellaceae  
Nocardiaceae  
Nocardioidaceae  
Nocardiopsaceae  
Nocardiopsaceae  
Pseudonocardiaceae  
Pseudonocardiaceae  
Pseudonocardiaceae  
Pseudonocardiaceae  
Streptomycetaceae

Streptomycetaceae  
unclassifiedPseudonocardineae  
Coriobacteriaceae  
Armatimonadaceae  
Flavobacteriaceae  
Sphingobacteriaceae  
Roseiflexaceae  
Spirulinaceae  
unclassifiedOscillatoriales  
unclassifiedOscillatoriales  
Bacillaceae  
Bacillaceae  
Bacillaceae  
Bacillaceae  
Bacillaceae  
Paenibacillaceae  
Paenibacillaceae  
Paenibacillaceae  
Paenibacillaceae  
Planococcaceae  
Leuconostocaceae  
Clostridiaceae  
Clostridiaceae  
Clostridiaceae  
ClostridialesFamilyXII.IncertaeSedis  
Eubacteriaceae  
Lachnospiraceae  
Lachnospiraceae  
Lachnospiraceae  
Peptoniphilaceae  
Parvularculaceae  
Beijerinckiaceae  
Hyphomicrobiaceae  
Methylobacteriaceae  
Methylobacteriaceae  
Rhodobacteraceae  
Rhodospirillaceae  
Rhodospirillaceae  
Sphingomonadaceae  
Sphingomonadaceae  
Burkholderiaceae  
Comamonadaceae  
Comamonadaceae  
Comamonadaceae  
Comamonadaceae  
Oxalobacteraceae

Hydrogenophilaceae  
Methylophilaceae  
Methylophilaceae  
Rhodocyclaceae  
Rhodocyclaceae  
Desulfuromonadaceae  
Geobacteraceae  
Anaeromyxobacteraceae  
Kofleriaceae  
Myxococcaceae  
Alteromonadaceae  
Alteromonadaceae  
Enterobacteriaceae  
Enterobacteriaceae  
Enterobacteriaceae  
Sinobacteraceae  
Xanthomonadaceae  
Chthoniobacter  
Micrococcaceae  
Pseudonocardiaceae  
Marinilabiliaceae  
Flavobacteriaceae  
Flavobacteriaceae  
Flavobacteriaceae  
Lachnospiraceae  
Oscillospiraceae  
Oligosphaeraceae  
Alcaligenaceae  
Comamonadaceae  
Rhodocyclaceae  
Campylobacteraceae  
Alcanivoracaceae  
Thiotrichaceae  
Xanthomonadaceae  
Xanthomonadaceae  
Actinomycetaceae  
Corynebacteriaceae  
Intrasporangiaceae  
Propionibacteriaceae  
Rhizobiaceae  
Rhodobacteraceae  
Methylophilaceae  
Desulfovibrionaceae  
Cardiobacteriaceae  
Xanthomonadaceae  
Xanthomonadaceae

Mariprofundaceae  
Spirochaetaceae  
Beutenbergiaceae  
Microbacteriaceae  
Microbacteriaceae  
Micrococcaceae  
Cytophagaceae  
Caldilineaceae  
Carnobacteriaceae  
Carnobacteriaceae  
Carnobacteriaceae  
Enterococcaceae  
Enterococcaceae  
Hyphomicrobiaceae  
Hyphomicrobiaceae  
Hyphomicrobiaceae  
Rhodobacteraceae  
Rhodobacteraceae  
Sphingomonadaceae  
Alcaligenaceae  
Alcaligenaceae  
Comamonadaceae  
Comamonadaceae  
Comamonadaceae  
Neisseriaceae  
Thermithiobacillaceae  
Ectothiorhodospiraceae  
Enterobacteriaceae  
Enterobacteriaceae  
Enterobacteriaceae  
Legionellaceae  
Methylothermaceae  
Oceanospirillaceae  
Moraxellaceae  
Pseudomonadaceae  
Acholeplasmataceae  
Geodermatophilaceae  
Jonesiaceae  
Microbacteriaceae  
Nocardiaceae  
Nocardiodaceae  
Pseudonocardiaceae  
Ruaniaceae  
Sanguibacteraceae  
Streptomycetaceae  
Streptomycetaceae

Nitriliruptoraceae  
Bacteroidaceae  
Flavobacteriaceae  
Planococcaceae  
Victivallaceae  
Caulobacteraceae  
Caulobacteraceae  
Caulobacteraceae  
Bartonellaceae  
Hyphomicrobiaceae  
Methylobacteriaceae  
Phyllobacteriaceae  
Rhizobiaceae  
Xanthobacteraceae  
unclassifiedRhizobiales  
Rhodobacteraceae  
Rhodobacteraceae  
Acetobacteraceae  
Sphingomonadaceae  
Sphingomonadaceae  
Alcaligenaceae  
Oxalobacteraceae  
Chromobacteriaceae  
Neisseriaceae  
Alteromonadaceae  
Alteromonadaceae  
Alteromonadaceae  
Pseudoalteromonadaceae  
Halomonadaceae  
Pasteurellaceae  
unclassifiedPseudomonadales  
Xanthomonadaceae  
Xanthomonadaceae  
OMGgroup  
Opitutaceae  
Brevibacteriaceae  
Corynebacteriaceae  
Demequinaceae  
Dermabacteraceae  
Geodermatophilaceae  
Intrasporangiaceae  
Microbacteriaceae  
Microbacteriaceae  
Microbacteriaceae  
Microbacteriaceae  
Microbacteriaceae

Microbacteriaceae  
Micrococcaceae  
Micrococcaceae  
Micrococcaceae  
Micrococcaceae  
Micrococcaceae  
Streptosporangiaceae  
Hydrogenothermaceae  
Cytophagaceae  
Flavobacteriaceae  
Flavobacteriaceae  
Flavobacteriaceae  
Flavobacteriaceae  
Flavobacteriaceae  
Sphingobacteriaceae  
Pseudanabaenaceae  
Bacillaceae  
Bacillaceae  
Bacillaceae  
Planococcaceae  
Staphylococcaceae  
Staphylococcaceae  
Staphylococcaceae  
Staphylococcaceae  
Aerococcaceae  
Aerococcaceae  
Carnobacteriaceae  
Enterococcaceae  
Streptococcaceae  
Clostridiaceae  
Peptostreptococcaceae  
Erysipelotrichaceae  
Caulobacteraceae  
Phyllobacteriaceae  
Rhodobiaceae  
Rhodobacteraceae

Burkholderiaceae  
Burkholderiaceae  
Methylophilaceae  
Methylophilaceae  
Chromobacteriaceae  
Neisseriaceae  
Neisseriaceae  
Neisseriaceae  
Neisseriaceae  
Neisseriaceae  
Neisseriaceae  
Neisseriaceae  
Neisseriaceae  
Neisseriaceae  
Rhodocyclaceae  
Rhodocyclaceae  
Bacteriovoracaceae  
Campylobacteraceae  
Cardiobacteriaceae  
Enterobacteriaceae  
Enterobacteriaceae  
Enterobacteriaceae  
Legionellaceae  
Oceanospirillaceae  
Pasteurellaceae  
Pasteurellaceae  
Pasteurellaceae  
Pasteurellaceae  
Pasteurellaceae  
Pasteurellaceae  
Pasteurellaceae  
Pasteurellaceae  
Moraxellaceae  
Moraxellaceae  
Xanthomonadaceae  
Spirochaetaceae  
Spirochaetaceae  
Acholeplasmataceae  
Acholeplasmataceae  
Spiroplasmataceae  
Corynebacteriaceae  
Geodermatophilaceae  
Geodermatophilaceae  
Jonesiaceae  
Jonesiaceae

Nocardoidaceae  
Pseudonocardiaceae  
Sanguibacteraceae  
Sanguibacteraceae  
Coriobacteriaceae  
Prolixibacteraceae  
Cryomorphaceae  
Flavobacteriaceae  
Flavobacteriaceae  
Flavobacteriaceae  
Flavobacteriaceae  
Flavobacteriaceae  
Flavobacteriaceae  
Flavobacteriaceae  
Sphingobacteriaceae  
Bacillaceae  
Paenibacillaceae  
Paenibacillaceae  
Planococcaceae  
Clostridiaceae  
ClostridialesFamilyXIII.IncertaeSedis  
Eubacteriaceae  
Cohaesibacteraceae  
Hyphomicrobiaceae  
Phyllobacteriaceae  
Phyllobacteriaceae  
Rhizobiaceae  
Rhodobiaceae  
Xanthobacteraceae  
Hyphomonadaceae  
Rhodobacteraceae  
Acetobacteraceae  
Rickettsiaceae  
Alcaligenaceae  
Burkholderiaceae  
unclassifiedBurkholderiales  
Methylophilaceae  
Nitrosomonadaceae  
Rhodocyclaceae  
Rhodocyclaceae  
Rhodocyclaceae  
Nannocystaceae  
Chromatiaceae  
Enterobacteriaceae  
Enterobacteriaceae  
Enterobacteriaceae



Enterobacteriaceae  
Methylococcaceae  
Methylococcaceae  
Moraxellaceae  
Pseudomonadaceae  
Pseudomonadaceae  
Vibrionaceae  
Alkalimonas  
Dethiosulfovibrionaceae  
Intrasporangiaceae  
Microbacteriaceae  
Nocardiopsaceae  
Nocardiopsaceae  
Promicromonosporaceae  
Promicromonosporaceae  
Streptomycetaceae  
Cytophagaceae  
Clostridiaceae  
Rhizobiaceae  
Erythrobacteraceae  
Comamonadaceae  
Alteromonadalesgeneraincertaesedis  
Methylococcaceae  
Methylococcaceae  
Oxalobacteraceae  
Oxalobacteraceae  
Oxalobacteraceae  
Oxalobacteraceae  
Pseudomonadaceae  
Beutenbergiaceae  
Brevibacteriaceae  
Microbacteriaceae  
Micromonosporaceae  
Mycobacteriaceae  
Mycobacteriaceae

Mycobacteriaceae  
Nocardoidaceae  
Pseudonocardiaceae  
Pseudonocardiaceae  
Pseudonocardiaceae  
Pseudonocardiaceae  
Pseudonocardiaceae  
Streptomycetaceae  
Cytophagaceae  
Flavobacteriaceae  
Flavobacteriaceae  
Flavobacteriaceae  
Flavobacteriaceae  
Sphingobacteriaceae  
Bacillaceae  
Bacillaceae  
Bacillaceae  
Bacillaceae  
Planococcaceae  
Leuconostocaceae  
Planctomycetaceae  
Methylocystaceae  
Phyllobacteriaceae  
Rhizobiaceae  
Rhizobiaceae  
Rhizobiaceae  
Rhizobiaceae  
Acetobacteraceae  
Sphingomonadaceae  
Sphingomonadaceae  
Alcaligenaceae  
Alcaligenaceae  
Alcaligenaceae  
Comamonadaceae  
Comamonadaceae  
Oxalobacteraceae

Oxalobacteraceae  
Gallionellaceae  
Nannocystaceae  
Enterobacteriaceae  
Enterobacteriaceae  
Enterobacteriaceae  
Enterobacteriaceae  
Legionellaceae  
Oceanospirillaceae  
Moraxellaceae  
Pseudomonadaceae  
Xanthomonadaceae  
Xanthomonadaceae  
Microbacteriaceae  
Aurantimonadaceae  
Methylobacteriaceae  
Rhizobiaceae  
Sphingomonadaceae  
Sphingomonadaceae  
Sphingomonadaceae  
Sphingomonadaceae  
Burkholderiaceae  
Comamonadaceae  
Comamonadaceae  
Comamonadaceae  
Oxalobacteraceae  
Enterobacteriaceae  
Moraxellaceae  
Microbacteriaceae  
Microbacteriaceae  
Micrococcaceae  
Flavobacteriaceae  
Planococcaceae  
Planococcaceae  
Hyphomicrobiaceae  
Rhodobacteraceae  
Oxalobacteraceae  
Micrococcaceae  
Promicromonosporaceae  
Bacillaceae  
Enterobacteriaceae  
Cryptosporangiaceae  
Microbacteriaceae  
Pseudonocardiaceae  
Prochlorococcaceae  
Rhodobacteraceae

Rhodobacteraceae  
Comamonadaceae  
Desulfurellaceae  
Cystobacteraceae  
Polyangiaceae  
Xanthomonadaceae  
Intrasporangiaceae  
Microbacteriaceae  
Propionibacteriaceae  
Sanguibacteraceae  
Sanguibacteraceae  
Sporichthyaceae  
Sporichthyaceae  
Flavobacteriaceae  
Flavobacteriaceae  
Parachlamydiaceae  
Chlorobiaceae  
ClostridialesFamilyXIX.IncertaeSedis  
Fusobacteriaceae  
Caulobacteraceae  
Bartonellaceae  
Beijerinckiaceae  
Bradyrhizobiaceae  
Phyllobacteriaceae  
Phyllobacteriaceae  
Rhizobiaceae  
unclassifiedRhizobiales  
Erythrobacteraceae  
Sphingomonadaceae  
Desulfovibrionaceae  
Cystobacteraceae  
Pseudomonadaceae  
Xanthomonadaceae  
Verrucomicrobiaceae  
Brevibacteriaceae  
Microbacteriaceae  
Microbacteriaceae  
Promicromonosporaceae  
Sphingobacteriaceae  
Sphingobacteriaceae  
Sphingomonadaceae  
Hydrogenophilaceae  
Pseudoalteromonadaceae  
Pseudoalteromonadaceae  
Oceanospirillaceae  
Clostridiaceae

Jiangellaceae  
Jiangellaceae  
Kineosporiaceae  
Nocardiopsaceae  
Pseudonocardiaceae  
Pseudonocardiaceae  
Streptomycetaceae  
Porphyromonadaceae  
Cytophagaceae  
Alicyclobacillaceae  
Bacillalesincertaesedis  
Thermoactinomycetaceae  
Thermoactinomycetaceae  
Thermoactinomycetaceae  
Thermoactinomycetaceae  
Thermoactinomycetaceae  
Streptococcaceae  
Planctomycetaceae  
Brucellaceae  
Cohaesibacteraceae  
Rhizobiaceae  
Acetobacteraceae  
Erythrobacteraceae  
Erythrobacteraceae  
Erythrobacteraceae  
Sphingomonadaceae  
Sphingomonadaceae  
Alcaligenaceae  
Comamonadaceae  
Comamonadaceae  
Comamonadaceae  
Comamonadaceae  
Oxalobacteraceae  
Oxalobacteraceae  
Hydrogenophilaceae  
Rhodocyclaceae  
Cystobacteraceae  
Cystobacteraceae  
Methylococcaceae  
Bogoriellaceae  
Dermacoccaceae  
Microbacteriaceae  
Microbacteriaceae  
Micrococcaceae  
Micrococcaceae  
Micrococcaceae

Micrococcaceae  
Micrococcaceae  
Streptomycetaceae  
Flavobacteriaceae  
Flavobacteriaceae  
Sphingobacteriaceae  
Planococcaceae  
Enterococcaceae  
Clostridiaceae  
Bradyrhizobiaceae  
Brucellaceae  
Rhodobacteraceae  
Rhodobacteraceae  
Rhodobacteraceae  
Sphingomonadaceae  
Comamonadaceae  
Comamonadaceae  
Rhodocyclaceae  
Enterobacteriaceae  
Cellulomonadaceae  
Cellulomonadaceae  
Microbacteriaceae  
Ruaniaceae  
Flavobacteriaceae  
Anaerolineaceae  
Thermosporotrichaceae  
Trueperaceae  
Pasteuriaceae  
ClostridialesFamilyXVII.IncertaeSedis  
Heliobacteriaceae  
Thermoanaerobacteraceae  
Phycisphaeraceae  
Caulobacteraceae  
Bartonellaceae  
Brucellaceae  
Hyphomicrobiaceae  
Hyphomicrobiaceae  
Phyllobacteriaceae  
Phyllobacteriaceae  
Rhizobiaceae  
Rhizobiaceae  
Rhizobiaceae  
Rhizobiaceae  
Rhodobiaceae  
unclassifiedRhizobiales  
Rhodobacteraceae

Rhodobacteraceae  
Sneathiellaceae  
Erythrobacteraceae  
Alcaligenaceae  
Alcaligenaceae  
Comamonadaceae  
Comamonadaceae  
Methylophilaceae  
Bacteriovoracaceae  
Bacteriovoracaceae  
Desulfohalobiaceae  
Cystobacteraceae  
Cystobacteraceae  
Nannocystaceae  
Granulosicoccaceae  
Halothiobacillaceae  
Legionellaceae  
Alcanivoracaceae  
Pseudomonadaceae  
Salinisphaeraceae  
Xanthomonadaceae  
Acholeplasmataceae  
Acholeplasmataceae  
Acholeplasmataceae  
Opitutaceae  
Micrococcaceae  
Streptomycetaceae  
Flavobacteriaceae  
Comamonadaceae  
Bdellovibrionaceae  
Bdellovibrionaceae  
Moraxellaceae  
Streptomycetaceae  
Williamsiaceae  
Flavobacteriaceae  
Thermoactinomycetaceae  
Aerococcaceae  
Brucellaceae  
Brucellaceae  
Brucellaceae  
Rhodobacteraceae  
Alcaligenaceae  
Alcaligenaceae  
Alcaligenaceae  
Aeromonadaceae  
Aeromonadaceae

Enterobacteriaceae  
Piscirickettsiaceae  
Xanthomonadaceae  
Xanthomonadaceae  
Microbacteriaceae  
Nocardiodaceae  
Clostridiaceae  
Peptostreptococcaceae  
Methylobacteriaceae  
Rhodospirillaceae  
Helicobacteraceae  
Enterobacteriaceae  
Acidobacteriaceae  
Acidobacteriaceae  
Acidobacteriaceae  
Nocardiaceae  
Streptomycetaceae  
Sphingobacteriaceae  
Comamonadaceae  
Nitrosomonadaceae  
Flavobacteriaceae  
Caulobacteraceae  
Corynebacteriaceae  
Kineosporiaceae  
Flavobacteriaceae  
Chitinophagaceae  
Phormidiaceae  
Carnobacteriaceae  
Methylobacteriaceae  
Rhodobacteraceae  
Anaplasmataceae  
unclassifiedBurkholderiales  
Nocardiodaceae  
Pseudonocardiaceae  
Pseudonocardiaceae  
Cytophagaceae  
Sphingobacteriaceae  
Paenibacillaceae  
Thermoactinomycetaceae  
Thermoactinomycetaceae  
Rhodobacteraceae  
Acetobacteraceae  
Sphingomonadaceae  
Rhodocyclaceae  
Enterobacteriaceae  
Sphingobacteriaceae



Oxalobacteraceae  
Enterobacteriaceae  
Corynebacteriaceae  
Prevotellaceae  
Methylocystaceae  
Phyllobacteriaceae  
Rhizobiaceae  
Rhodobacteraceae  
Rhodospirillaceae  
Alcaligenaceae  
Nitrosomonadaceae  
Sinobacteraceae  
Microbacteriaceae  
Microbacteriaceae  
Micrococcaceae  
Micrococcaceae  
Micromonosporaceae  
Micromonosporaceae  
Pseudonocardiaceae  
Streptomycetaceae  
Streptomycetaceae  
Cyclobacteriaceae  
Cyclobacteriaceae  
Flavobacteriaceae  
Planococcaceae  
Aurantimonadaceae  
Bartonellaceae  
Campylobacteraceae  
Enterobacteriaceae  
Coxiellaceae  
Pseudomonadaceae  
Xanthomonadaceae  
Alkalimonas  
Corynebacteriaceae  
Micrococcaceae  
Nocardiodaceae  
Pseudonocardiaceae  
Flavobacteriaceae  
Flavobacteriaceae  
Bacillalesincertaesedis  
Bacillalesincertaesedis  
Paenibacillaceae  
Staphylococcaceae  
Bradyrhizobiaceae  
Brucellaceae  
Methylobacteriaceae

Rhodobacteraceae  
Methylophilaceae  
Sulfuricellaceae  
Aeromonadaceae  
Enterobacteriaceae  
Coxiellaceae  
Methylococcaceae  
Pasteurellaceae  
Actinomycetaceae  
Corynebacteriaceae  
Geodermatophilaceae  
Geodermatophilaceae  
Nocardiopsaceae  
Nocardiopsaceae  
Prevotellaceae  
Paenibacillaceae  
Acetobacteraceae  
Burkholderiaceae  
Aeromonadaceae  
Aeromonadaceae  
Micrococcaceae  
Streptomycetaceae  
Xanthomonadaceae

**Table S1. Raw Counts of Taxonomic OTUs across all samples.**

**Genus**

unknown\_Genus\_of\_Acidobacteriaceae  
unknown\_Genus\_of\_Microthrixaceae  
unknown\_Genus\_of\_Acidimicrobiaceae  
Aciditerrimonas  
Aciditerrimonas  
Ilumatobacter  
unknown\_Genus\_of\_Lamiaceae  
unknown\_Genus\_of\_Actinomycetaceae  
unknown\_Genus\_of\_Beutenbergiaceae  
ambiguous\_Genus\_of\_Beutenbergiaceae  
Beutenbergia  
Salana  
unknown\_Genus\_of\_Bogoriellaceae  
Georgenia  
Georgenia  
Georgenia  
Brevibacterium  
Brevibacterium  
Brevibacterium  
ambiguous\_Genus\_of\_Cellulomonadaceae  
Cellulomonas  
Cellulomonas  
Cellulomonas  
Cellulomonas  
Corynebacterium  
Corynebacterium  
Corynebacterium  
Corynebacterium  
Corynebacterium  
Corynebacterium  
Corynebacterium  
Corynebacterium  
Corynebacterium  
ambiguous\_Genus\_of\_Demequinaceae  
Demequina  
Demequina  
unknown\_Genus\_of\_Dermabacteraceae  
ambiguous\_Genus\_of\_Dermabacteraceae  
Brachybacterium  
Brachybacterium  
Brachybacterium

Brachybacterium  
Brachybacterium  
Brachybacterium  
Brachybacterium  
Brachybacterium  
unknown\_Genus\_of\_Dermacoccaceae  
ambiguous\_Genus\_of\_Dermacoccaceae  
unknown\_Genus\_of\_Dermatophilaceae  
Austwickia  
Dermatophilus  
Kineosphaera  
Mobilicoccus  
Mobilicoccus  
Piscicoccus  
Piscicoccus  
Tonsilliphilus  
ambiguous\_Genus\_of\_Dietziaceae  
Dietzia  
Dietzia  
Dietzia  
Dietzia  
Dietzia  
unknown\_Genus\_of\_Frankiaceae  
ambiguous\_Genus\_of\_Geodermatophilaceae  
Blastococcus  
Blastococcus  
Blastococcus  
Blastococcus  
Blastococcus  
Geodermatophilus  
unknown\_Genus\_of\_Intrasporangiaceae  
ambiguous\_Genus\_of\_Intrasporangiaceae  
Aquipuribacter  
Janibacter  
Janibacter  
Janibacter  
Janibacter  
Knoellia  
Knoellia  
Kribbia  
Kribbia  
Ornithinibacter  
Ornithinicoccus  
Ornithinicoccus  
Ornithinimicrobium  
Ornithinimicrobium

Ornithinimicrobium  
Ornithinimicrobium  
Serinicoccus  
Serinicoccus  
Serinicoccus  
Terrabacter  
Terrabacter  
Tetrasphaera  
Tetrasphaera  
Tetrasphaera  
Tetrasphaera  
ambiguous\_Genus\_of\_Kineosporiaceae  
ambiguous\_Genus\_of\_Microbacteriaceae  
Agrococcus  
Clavibacter  
Curtobacterium  
Frigoribacterium  
Frigoribacterium  
Leucobacter  
Microbacterium  
Microbacterium  
Microbacterium  
Microbacterium  
Microbacterium  
Microbacterium  
Microbacterium  
Microbacterium  
Microbacterium  
Okibacterium  
Plantibacter  
Pseudoclavibacter  
Rathayibacter  
Rathayibacter  
Rathayibacter  
unknown\_Genus\_of\_Micrococcaceae  
ambiguous\_Genus\_of\_Micrococcaceae  
Arthrobacter  
Arthrobacter

Arthrobacter  
Enteractinococcus  
Enteractinococcus  
Kocuria  
Kocuria  
Kocuria  
Kocuria  
Kocuria  
Kocuria  
Microbispora  
Micrococcus  
Micrococcus  
Micrococcus  
Yaniella  
Yaniella  
unknown\_Genus\_of\_Micromonosporaceae  
ambiguous\_Genus\_of\_Micromonosporaceae  
Motilibacter  
Motilibacter  
unknown\_Genus\_of\_Nocardiaceae  
ambiguous\_Genus\_of\_Nocardiaceae  
Rhodococcus  
Rhodococcus  
Rhodococcus  
Rhodococcus  
unknown\_Genus\_of\_Nocardioidaceae  
ambiguous\_Genus\_of\_Nocardioidaceae  
Aeromicrobium  
Aeromicrobium  
Aeromicrobium  
Marmoricola  
Nocardioides  
Nocardioides  
Nocardioides  
Nocardioides  
unknown\_Genus\_of\_Propionibacteriaceae  
ambiguous\_Genus\_of\_Propionibacteriaceae  
Aestuariimicrobium  
Luteococcus  
Luteococcus  
Propionibacterium  
Tessaracoccus  
Tessaracoccus  
Tessaracoccus  
unknown\_Genus\_of\_Pseudonocardiaceae  
Prauserella

Prauserella  
Saccharopolyspora  
Saccharopolyspora  
Saccharopolyspora  
Haloactinobacterium  
ambiguous\_Genus\_of\_Sanguibacteraceae  
Sanguibacter  
Sanguibacter  
Sanguibacter  
unknown\_Genus\_of\_Segniliparaceae  
unknown\_Genus\_of\_Sporichthyaceae  
Sporichthya  
unknown\_Genus\_of\_Streptomycetaceae  
ambiguous\_Genus\_of\_Streptomycetaceae  
Streptomyces  
Streptomyces  
unknown\_Genus\_of\_Streptosporangiaceae  
unknown\_Genus\_of\_Coriobacteriaceae  
unknown\_Genus\_of\_Conexibacteraceae  
unknown\_Genus\_of\_Thermoleophilaceae  
unknown\_Genus\_of\_Rhodothermaceae  
unknown\_Genus\_of\_Porphyrimonadaceae  
unknown\_Genus\_of\_Cyclobacteriaceae  
ambiguous\_Genus\_of\_Cyclobacteriaceae  
Algoriphagus  
Echinicola  
unknown\_Genus\_of\_Cytophagaceae  
ambiguous\_Genus\_of\_Cytophagaceae  
Adhaeribacter  
Adhaeribacter  
Adhaeribacter  
Adhaeribacter  
Pontibacter  
Rufibacter  
unknown\_Genus\_of\_Flammeovirgaceae  
Fluviicola  
unknown\_Genus\_of\_Flavobacteriaceae  
ambiguous\_Genus\_of\_Flavobacteriaceae  
Aequorivita  
Aequorivita  
Bergeyella  
Chryseobacterium  
Chryseobacterium  
Chryseobacterium  
Chryseobacterium  
Chryseobacterium

Chryseobacterium  
Chryseobacterium  
Empedobacter  
Empedobacter  
Epilithonimonas  
Flavobacterium  
Flavobacterium  
Flavobacterium  
Flavobacterium  
Flavobacterium  
Flavobacterium  
Flavobacterium  
Flavobacterium  
Flavobacterium  
Gillisia  
Gillisia  
Gillisia  
Myroides  
Salinimicrobium  
Ulvibacter  
Vitellibacter  
Wautersiella  
unknown\_Genus\_of\_Chitinophagaceae  
unknown\_Genus\_of\_Sphingobacteriaceae  
ambiguous\_Genus\_of\_Sphingobacteriaceae  
Mucilaginibacter  
Pedobacter  
Pedobacter  
Pedobacter  
Pedobacter  
Pedobacter  
Pedobacter  
Pedobacter  
Sphingobacterium  
Sphingobacterium  
Sphingobacterium  
Sphingobacterium  
unknown\_Genus\_of\_Waddliaceae  
unknown\_Genus\_of\_Ardenscatenaceae  
unknown\_Genus\_of\_Thermogemmatissporaceae  
unknown\_Genus\_of\_Sphaerobacteraceae  
unknown\_Genus\_of\_Gloeobacteraceae  
unknown\_Genus\_of\_Nostocaceae  
Deinococcus  
unknown\_Genus\_of\_Bacillaceae



Streptococcus

unknown\_Genus\_of\_Clostridiaceae  
ambiguous\_Genus\_of\_Clostridiaceae  
Clostridium  
Clostridium  
Sarcina  
unknown\_Genus\_of\_ClostridialesFamilyXII.IncertaeSedis  
unknown\_Genus\_of\_ClostridialesFamilyXIII.IncertaeSedis  
Anaerostipes  
unknown\_Genus\_of\_Peptococcaceae  
unknown\_Genus\_of\_Peptostreptococcaceae  
Peptostreptococcus  
unknown\_Genus\_of\_Ruminococcaceae  
unknown\_Genus\_of\_Syntrophomonadaceae  
unknown\_Genus\_of\_Natranaerobiaceae  
unknown\_Genus\_of\_Gemmatimonadaceae  
unknown\_Genus\_of\_Ignavibacteriaceae  
unknown\_Genus\_of\_Nitrospinaceae  
unknown\_Genus\_of\_Caulobacteraceae  
ambiguous\_Genus\_of\_Caulobacteraceae  
Asticcacaulis  
Asticcacaulis  
Asticcacaulis  
Asticcacaulis  
Brevundimonas  
Caulobacter  
Caulobacter  
Phenylobacterium  
ambiguous\_Genus\_of\_Aurantimonadaceae  
Aurantimonas  
Aurantimonas  
Aureimonas  
Aureimonas  
unknown\_Genus\_of\_Beijerinckiaceae  
ambiguous\_Genus\_of\_Beijerinckiaceae

Chelatococcus  
Methylocapsa  
unknown\_Genus\_of\_Bradyrhizobiaceae  
ambiguous\_Genus\_of\_Bradyrhizobiaceae  
Bosea  
Bosea  
ambiguous\_Genus\_of\_Brucellaceae  
Daeguia  
Ochrobactrum  
Pseudochrobactrum  
unknown\_Genus\_of\_Hyphomicrobiaceae  
ambiguous\_Genus\_of\_Hyphomicrobiaceae  
Devosia  
Pelagibacterium  
Pelagibacterium  
Methylobacterium  
Methylobacterium  
Methylobacterium  
Methylobacterium  
Methylobacterium  
ambiguous\_Genus\_of\_Methylocystaceae  
Methylocystis  
Methylosinus  
unknown\_Genus\_of\_Phyllobacteriaceae  
ambiguous\_Genus\_of\_Phyllobacteriaceae  
Aminobacter  
Aquamicrobium  
Aquamicrobium  
Hoeflea  
Mesorhizobium  
Mesorhizobium  
Mesorhizobium  
Mesorhizobium

[illegible]

Paracoccus  
Paracoccus  
Paracoccus  
Paracoccus  
Pseudorhodobacter  
Pseudorhodobacter  
Pseudorhodobacter  
Rhodobacter  
Rhodobacter  
Rhodobacter  
Rhodobacter  
Rhodobacter  
Rhodobacter  
Rubellimicrobium  
Rubellimicrobium  
unknown\_Genus\_of\_Acetobacteraceae  
ambiguous\_Genus\_of\_Acetobacteraceae  
Roseomonas  
Roseomonas  
Roseomonas  
Roseomonas  
unknown\_Genus\_of\_Rhodospirillaceae  
unknown\_Genus\_of\_Rickettsiaceae  
unknown\_Genus\_of\_Erythrobacteraceae  
ambiguous\_Genus\_of\_Erythrobacteraceae  
Altererythrobacter  
Altererythrobacter  
Altererythrobacter  
Altererythrobacter  
Erythrobacter  
Erythrobacter  
Erythrobacter  
Erythrobacter  
Erythrobacter  
Erythrobacter  
Erythromicrobium  
Erythromicrobium  
Porphyrobacter  
Porphyrobacter  
unknown\_Genus\_of\_Sphingomonadaceae  
ambiguous\_Genus\_of\_Sphingomonadaceae  
Altererythrobacter  
Blastomonas  
Lutibacterium  
Novosphingobium  
Novosphingobium  
Novosphingobium  
Novosphingobium

Novosphingobium  
Novosphingobium  
Novosphingobium  
Novosphingobium  
Sandaracinobacter  
Sphingobium  
Sphingobium  
Sphingobium  
Sphingobium  
Sphingobium  
Sphingomonas  
Sphingopyxis  
Sphingopyxis  
Sphingopyxis  
Sphingosinicella  
unknown\_Genus\_of\_Alcaligenaceae  
Achromobacter  
Achromobacter  
Derrxia  
Oligella  
Oligella  
Paenicaligenes  
Pellicularia  
Pseudomonas  
ambiguous\_Genus\_of\_Burkholderiaceae  
Burkholderia  
ambiguous\_Genus\_of\_Comamonadaceae  
Acidovorax  
Acidovorax

Acidovorax  
Acidovorax  
Acidovorax  
Acidovorax  
Comamonas  
Comamonas  
Comamonas  
Comamonas  
Comamonas  
Diaphorobacter  
Limnohabitans  
Pseudorhodoferax  
Pseudorhodoferax  
Rhodoferax  
Rhodoferax  
Rubrivivax  
Rubrivivax  
Variovorax  
Xenophilus  
unknown\_Genus\_of\_Oxalobacteraceae  
ambiguous\_Genus\_of\_Oxalobacteraceae  
Janthinobacterium  
Massilia  
Massilia  
Massilia  
Massilia  
Massilia  
Massilia  
ambiguous\_Genus\_of\_unclassifiedBurkholderiales  
Aquabacterium  
Piscinibacter  
unknown\_Genus\_of\_Neisseriaceae  
Neisseria  
unknown\_Genus\_of\_Rhodocyclaceae  
unknown\_Genus\_of\_Bacteriovoracaceae  
Peredibacter  
unknown\_Genus\_of\_Bdellovibrionaceae  
Bdellovibrio  
Bdellovibrio  
unknown\_Genus\_of\_Desulfobulbaceae  
unknown\_Genus\_of\_Polyangiaceae  
Campylobacter  
unknown\_Genus\_of\_Alteromonadaceae  
Marinimicrobium  
Marinobacter  
Teredinibacter





Pseudomonas  
Pseudomonas  
Pseudomonas  
Pseudomonas  
Pseudomonas  
Pseudomonas  
Pseudomonas  
Pseudomonas  
Rhizobacter  
unknown\_Genus\_of\_Piscirickettsiaceae  
Methylophaga  
Thiomicrospira  
ambiguous\_Genus\_of\_Sinobacteraceae  
Steroidobacter  
unknown\_Genus\_of\_Xanthomonadaceae  
ambiguous\_Genus\_of\_Xanthomonadaceae  
Luteimonas  
Luteimonas  
Luteimonas  
Luteimonas  
Luteimonas  
Luteimonas  
Luteimonas  
Lysobacter  
Lysobacter  
Lysobacter  
Lysobacter  
Lysobacter  
Lysobacter  
Pseudoxanthomonas  
Pseudoxanthomonas  
Pseudoxanthomonas  
Pseudoxanthomonas  
Stenotrophomonas  
Stenotrophomonas  
Stenotrophomonas  
Stenotrophomonas  
Stenotrophomonas  
Stenotrophomonas  
Stenotrophomonas  
Stenotrophomonas  
Thermomonas  
Thermomonas  
Thermomonas  
Thermomonas  
Thermomonas



Jonesia  
unknown\_Genus\_of\_Kineosporiaceae  
Angustibacter  
unknown\_Genus\_of\_Microbacteriaceae  
Agrococcus  
Agromyces  
Curtobacterium  
Curtobacterium  
Herbiconiux  
Microbacterium  
Microbacterium  
Microbacterium  
Microbacterium  
Microbacterium  
Microbacterium  
Plantibacter  
Rathayibacter  
Rathayibacter  
Arthrobacter  
Arthrobacter  
Arthrobacter  
Micrococcus  
Nesterenkonia  
Yaniella  
Yaniella  
Nakamurella  
Aeromicrobium  
Aeromicrobium  
Marmoricola  
Nocardioides  
Nocardioides  
Nocardioides  
Nocardioides  
Nocardioides  
ambiguous\_Genus\_of\_Nocardiopsaceae  
Murinocardiopsis  
Nocardiopsis  
Nocardiopsis  
Thermobifida  
Thermobifida  
Promicromonospora  
Promicromonospora  
Promicromonospora  
Brooklawnia  
ambiguous\_Genus\_of\_Pseudonocardiaceae  
Actinomyces

Pseudonocardia  
Pseudonocardia  
Saccharomonospora  
Saccharopolyspora  
Saccharopolyspora  
Saccharopolyspora  
Sanguibacter  
Streptomyces  
Streptomyces  
Streptomyces  
unknown\_Genus\_of\_Bifidobacteriaceae  
Patulibacter  
unknown\_Genus\_of\_Bacteroidaceae  
Bacteroides  
Bacteroides  
Porphyromonas  
Porphyromonas  
Proteiniphilum  
unknown\_Genus\_of\_Prevotellaceae  
Alloprevotella  
Prevotella  
Prevotella  
Prevotella  
Hymenobacter  
Hymenobacter  
unknown\_Genus\_of\_Cryomorphaceae  
Chryseobacterium  
Chryseobacterium  
Empedobacter  
Flavobacterium  
Flavobacterium  
Myroides  
Myroides  
Wautersiella  
Mucilaginibacter  
Pedobacter  
Pedobacter  
Pedobacter  
Pedobacter  
Sphingobacterium  
Sphingobacterium  
Sphingobacterium  
Sphingobacterium  
unknown\_Genus\_of\_Cribrlamydiaceae  
ambiguous\_Genus\_of\_Nostocaceae  
unknown\_Genus\_of\_Phormidiaceae

unknown\_Genus\_of\_Deinococcaceae  
Fibrobacter  
unknown\_Genus\_of\_Alicyclobacillaceae  
Amphibacillus  
Bacillus  
Bacillus  
Bacillus  
Bacillus  
Bacillus  
Bacillus  
Gracilibacillus  
Lysinibacillus  
Lysinibacillus  
Lysinibacillus  
Lysinibacillus  
Oceanobacillus  
Oceanobacillus  
Oceanobacillus  
Virgibacillus  
Gemella  
Gemella  
Paenibacillus  
Paenibacillus  
Paenibacillus  
Caryophanon  
Caryophanon  
Kurthia  
Kurthia  
Kurthia  
Lysinibacillus  
Planococcus  
Planococcus  
Planococcus  
Planococcus  
Planococcus  
Planomicrobium  
Planomicrobium  
Solibacillus  
Viridibacillus  
unknown\_Genus\_of\_Staphylococcaceae  
Jeotgalicoccus  
Jeotgalicoccus  
Macrococcus  
Macrococcus  
Salinicoccus  
Salinicoccus

Staphylococcus  
Staphylococcus  
Staphylococcus  
Staphylococcus  
unknown\_Genus\_of\_Thermoactinomycetaceae  
Facklamia  
Globicatella  
Globicatella  
Globicatella  
ambiguous\_Genus\_of\_Carnobacteriaceae  
Atopostipes  
Carnobacterium  
Granulicatella  
Granulicatella  
Granulicatella  
unknown\_Genus\_of\_Enterococcaceae  
ambiguous\_Genus\_of\_Enterococcaceae  
Enterococcus  
unknown\_Genus\_of\_Lactobacillaceae  
Lactobacillus  
Weissella  
Streptococcus  
Streptococcus  
Streptococcus  
Streptococcus  
Clostridium  
Proteiniclasticum  
unknown\_Genus\_of\_ClostridialesFamilyXI.IncertaeSedis  
Anaerococcus  
Anaerococcus  
Anaerococcus  
Finegoldia  
Peptoniphilus  
Peptoniphilus  
Tissierella  
Tissierella  
unknown\_Genus\_of\_Lachnospiraceae  
ambiguous\_Genus\_of\_Lachnospiraceae  
Blautia  
Coprococcus  
Coprococcus  
unknown\_Genus\_of\_Peptoniphilaceae  
ambiguous\_Genus\_of\_Peptoniphilaceae  
Anaerococcus  
Finegoldia  
Helcococcus

Peptoclostridium  
Ruminococcus  
Ruminococcus  
unknown\_Genus\_of\_unclassifiedClostridiales  
unknown\_Genus\_of\_Erysipelotrichaceae  
unknown\_Genus\_of\_Veillonellaceae  
unknown\_Genus\_of\_Nitrospiraceae  
unknown\_Genus\_of\_Magnetococcaceae  
unknown\_Genus\_of\_Aurantimonadaceae  
ambiguous\_Genus\_of\_Bartonellaceae  
Cucumibacter  
Pelagibacterium  
Chelativorans  
Nitratreductor  
Thermovum  
Rhizobium  
Rhizobium  
Shinella  
unknown\_Genus\_of\_Xanthobacteraceae  
Xanthobacter  
ambiguous\_Genus\_of\_unclassifiedRhizobiales  
Vasilyevaea  
Rhodobacter  
Rhodobacter  
Roseivivax  
Thioclava  
Tranquillimonas  
Yangia  
Novosphingobium  
Sphingomonas  
Sphingomonas  
Sphingomonas  
Sphingomonas  
Sphingomonas  
ambiguous\_Genus\_of\_Alcaligenaceae  
Advenella  
Alcaligenes  
Bordetella  
Paenalcaligenes  
Pigmentiphaga  
Pigmentiphaga  
Pusillimonas  
unknown\_Genus\_of\_Burkholderiaceae  
Burkholderia  
Comamonas  
Hydrogenophaga

Hydrogenophaga  
Malikia  
Pelomonas  
Pelomonas  
Pseudacidovorax  
Ramlibacter  
Variovorax  
Variovorax  
Duganella  
Duganella  
Duganella  
Janthinobacterium  
Janthinobacterium  
Janthinobacterium  
Massilia  
Massilia  
Massilia  
Tepidiphilus  
Neisseria  
Neisseria  
Azoarcus  
Denitratisoma  
Petrobacter  
unknown\_Genus\_of\_Desulfobacteraceae  
unknown\_Genus\_of\_Desulfovibrionaceae  
unknown\_Genus\_of\_Geobacteraceae  
unknown\_Genus\_of\_Pelobacteraceae  
unknown\_Genus\_of\_Syntrophaceae  
unknown\_Genus\_of\_Syntrophobacteraceae  
Arcobacter  
Arcobacter  
Arcobacter  
Arcobacter  
Campylobacter  
unknown\_Genus\_of\_Helicobacteraceae  
unknown\_Genus\_of\_Aeromonadaceae  
Aeromonas  
Alishewanella  
Alishewanella  
Marinimicrobium  
Microbulbifer  
Teredinibacter  
unknown\_Genus\_of\_Idiomarinaceae  
unknown\_Genus\_of\_Ectothiorhodospiraceae  
Halothiobacillus  
Citrobacter



Enterobacter  
Erwinia  
Erwinia  
Erwinia  
Erwinia  
Erwinia  
Leclercia  
Pantoea  
Pantoea  
Pantoea  
Serratia  
Serratia  
ambiguous\_Genus\_of\_Legionellaceae  
Legionella  
unknown\_Genus\_of\_Methylothermaceae  
unknown\_Genus\_of\_Alcanivoracaceae  
unknown\_Genus\_of\_Hahellaceae  
unknown\_Genus\_of\_Halomonadaceae  
Halomonas  
Thalassolituus  
Thalassolituus  
unknown\_Genus\_of\_Orbaceae  
unknown\_Genus\_of\_Pasteurellaceae  
Actinobacillus  
Actinobacillus  
Actinobacillus  
Actinobacillus  
Acinetobacter  
Acinetobacter  
Acinetobacter  
Acinetobacter  
Acinetobacter  
Alkanindiges  
Moraxella  
Moraxella  
Moraxella  
Moraxella  
Azomonas  
Cellvibrio  
Pseudomonas  
Pseudomonas  
Pseudomonas  
Pseudomonas  
Pseudomonas  
Pseudomonas  
Pseudomonas

Pseudomonas  
Pseudomonas  
Pseudomonas  
Pseudomonas  
Pseudomonas  
Pseudomonas  
Pseudomonas  
Pseudomonas  
Pseudomonas  
Methylophaga  
unknown\_Genus\_of\_Thiotrichaceae  
Achromatium  
Pseudoalteromonas  
ambiguous\_Genus\_of\_Vibrionaceae  
Dokdonella  
Pseudoxanthomonas  
Sphaerochaeta  
Acholeplasma  
Corynebacterium  
Corynebacterium  
Brachybacterium  
Leucobacter  
Leucobacter  
Micrococcus  
Nesterenkonia  
Zhihengliuella  
Aeromicrobium  
Nocardioides  
Nocardioides  
Nocardioides  
Lysinibacillus  
Sporosarcina  
Staphylococcus  
Atopococcus  
Enterococcus  
ambiguous\_Genus\_of\_Eubacteriaceae  
Eubacterium  
ambiguous\_Genus\_of\_Peptostreptococcaceae  
Citricella  
Natronohydrobacter  
Paenirhodobacter  
Pseudorhodobacter  
Roseibaca  
Tabrizicola  
Sphingopyxis  
Bordetella

Castellaniella  
Curvibacter  
unknown\_Genus\_of\_Acidithiobacillaceae  
Zobellella  
ambiguous\_Genus\_of\_Alteromonadaceae  
Marinimicrobium  
Aliidiomarina  
ambiguous\_Genus\_of\_Shewanellaceae  
ambiguous\_Genus\_of\_Ectothiorhodospiraceae  
Erwinia  
ambiguous\_Genus\_of\_Halomonadaceae  
Pseudomonas  
Spongiibacter  
Georgenia  
ambiguous\_Genus\_of\_Corynebacteriaceae  
Brachybacterium  
unknown\_Genus\_of\_Dietziaceae  
Dietzia  
Stackebrandtia  
Janibacter  
Knoellia  
Knoellia  
Microbacterium  
Microbacterium  
Microbacterium  
Arthrobacter  
Arthrobacter  
Citricoccus  
Citricoccus  
Mycobacterium  
unknown\_Genus\_of\_Nakamurellaceae  
Rhodococcus  
Nocardioides  
Nocardiopsis  
Nocardiopsis  
ambiguous\_Genus\_of\_Promicromonosporaceae  
Myceligenans  
Microlunatus  
Propionibacterium  
Propionibacterium  
Saccharopolyspora  
Haloactinobacterium  
Ruania  
Streptomyces  
Streptomyces  
Cytophaga

Flavobacterium  
Galbibacter  
Leeuwenhoekiella  
Subsaximicrobium  
Winogradskyella  
Parapedobacter  
Alkalibacillus  
Bacillus  
Ornithinibacillus  
Sporosarcina  
Aerococcus  
Desemzia  
Isobaculum  
Enterococcus  
Enterococcus  
Enterococcus  
Weissella  
unknown\_Genus\_of\_Catabacteriaceae  
unknown\_Genus\_of\_Eubacteriaceae  
Saccharofermentans  
unknown\_Genus\_of\_Leptotrichiaceae  
Ketogulonicigenium  
Paracoccus  
Paracoccus  
Sphingopyxis  
Sphingopyxis  
unknown\_Genus\_of\_Campylobacteraceae  
Acinetobacter  
Pseudomonas  
Methylophaga  
Methylophaga  
Methylophaga  
Luteimonas  
Simiduia  
unknown\_Genus\_of\_Dethiosulfovibrionaceae  
unknown\_Genus\_of\_Synergistaceae  
Synergistes  
Actinomyces  
Actinomyces  
Actinomyces  
Actinomyces  
Actinomyces  
Corynebacterium  
Corynebacterium  
Corynebacterium  
Corynebacterium

Dermacoccus  
Dietzia  
Dietzia  
Cryobacterium  
Microbacterium  
Mycetocola  
Kocuria  
Micrococcus  
Rothia  
Rothia  
Aeromicrobium  
Nocardiopsis  
Propionibacterium  
Saccharopolyspora  
Saccharopolyspora  
unknown\_Genus\_of\_Patulibacteraceae  
unknown\_Genus\_of\_Solirubrobacteraceae  
Porphyromonas  
Prevotella  
Olivibacter  
Bacillus  
Bacillus  
Exiguobacterium  
Gemella  
Gemella  
Gemella  
Brochothrix  
Paenibacillus  
Ureibacillus  
Ureibacillus  
Staphylococcus  
Staphylococcus  
Staphylococcus  
Staphylococcus  
Staphylococcus  
Laceyella  
Abiotrophia  
Granulicatella  
ambiguous\_Genus\_of\_Lactobacillaceae  
Lactobacillus  
Lactobacillus  
Lactococcus  
Lactococcus  
Streptococcus  
Streptococcus  
Streptococcus

Streptococcus  
Streptococcus  
Streptococcus  
Anaerococcus  
Anaerococcus  
Peptoniphilus  
Eubacterium  
Mogibacterium  
Eubacterium  
Roseburia  
Peptoniphilus  
Filifactor  
Peptostreptococcus  
Faecalibacterium  
Ruminococcus  
Veillonella  
unknown\_Genus\_of\_Acidaminococcaceae  
Negativicoccus  
Selenomonas  
Veillonella  
Veillonella  
Veillonella  
Veillonella  
Brevundimonas  
Caulobacter  
Caulobacter  
Gemmiger  
Methylobacterium  
Paracoccus  
Bordetella  
Ralstonia  
Oxalobacter  
Tepidimonas  
ambiguous\_Genus\_of\_Hydrogenophilaceae  
Neisseria  
Neisseria  
Campylobacter  
Haemophilus  
Acinetobacter  
Enhydrobacter  
Moraxella  
Photobacterium  
Thermomonas  
unknown\_Genus\_of\_Holophagaceae  
Flaviflexus  
Mobiluncus

Mobiluncus  
Mobiluncus  
ambiguous\_Genus\_of\_Bogoriellaceae  
Brevibacterium  
Corynebacterium  
Corynebacterium  
Corynebacterium  
Dermabacter  
Geodermatophilus  
Knoellia  
Kineococcus  
Kineococcus  
Kineococcus  
Kineococcus  
Pseudokineococcus  
Agrococcus  
Curtobacterium  
Curtobacterium  
Gulosibacter  
Leucobacter  
Microbacterium  
Arthrobacter  
Kocuria  
Nesterenkonia  
Nocardia  
Rhodococcus  
Nocardioides  
Nocardioides  
Nocardioides  
Nocardioides  
Promicromonospora  
Luteococcus  
Tessaracoccus  
Actinoalloteichus  
Pseudonocardia  
Streptomyces  
Gaiella  
Bacteroides  
Prevotella  
Cytophaga  
Hymenobacter  
Hymenobacter  
Chryseobacterium  
Epilithonimonas  
Myroides  
Myroides

Myroides  
unknown\_Genus\_of\_Saprospiraceae  
Sphingobacterium  
unknown\_Genus\_of\_Dehalococcoidaceae  
unknown\_Genus\_of\_unclassifiedDehalococcoidia  
unknown\_Genus\_of\_Fibrobacteraceae  
Fibrobacter  
Fibrobacter  
Bacillus  
Bacillus  
Bacillus  
Gracilibacillus  
Oceanobacillus  
Streptohalobacillus  
Paenibacillus  
Paenibacillus  
Caryophanon  
Planococcus  
Rummeliibacillus  
Rummeliibacillus  
Jeotgalicoccus  
Staphylococcus  
Thermoactinomyces  
Thermoactinomyces  
Aerococcus  
Alkalibacterium  
Alkalibacterium  
Atopococcus  
Enterococcus  
Enterococcus  
Leuconostoc  
Weissella  
Lactococcus  
unknown\_Genus\_of\_Christensenellaceae  
Eubacterium  
unknown\_Genus\_of\_Gracilibacteraceae  
Dorea  
Roseburia  
[Ruminococcus]  
[Ruminococcus]  
unknown\_Genus\_of\_Oscillospiraceae  
Peptoniphilus  
unknown\_Genus\_of\_Proteinivoraceae  
ambiguous\_Genus\_of\_Ruminococcaceae  
Faecalibacterium  
Ruminococcus



unknown\_Genus\_of\_Fusobacteriaceae  
Camelimonas  
Ochrobactrum  
Pseudochrobactrum  
ambiguous\_Genus\_of\_Methylobacteriaceae  
Methylobacterium  
Methylobacterium  
Microvirga  
Microvirga  
Donghicola  
Paracoccus  
Sphingomicrobium  
Sphingomonas  
Sphingomonas  
Sphingomonas  
Sphingomonas  
Alcaligenes  
Eoetvoesia  
Parapusillimonas  
Pusillimonas  
unknown\_Genus\_of\_Comamonadaceae  
Massilia  
unknown\_Genus\_of\_Sutterellaceae  
Iodobacter  
unknown\_Genus\_of\_Nitrosomonadaceae  
unknown\_Genus\_of\_Myxococcaceae  
unknown\_Genus\_of\_Succinivibrionaceae  
Aliidiomarina  
Idiomarina  
ambiguous\_Genus\_of\_Pseudoalteromonadaceae  
ambiguous\_Genus\_of\_Psychromonadaceae  
Shewanella  
unknown\_Genus\_of\_Arenicellaceae  
Rheinheimera  
Rheinheimera  
Rheinheimera  
Rheinheimera  
Rheinheimera  
unknown\_Genus\_of\_Thioalkalspiraceae  
Enterobacter  
Erwinia  
unknown\_Genus\_of\_Coxiellaceae  
Halomonas  
Halomonas  
Halomonas  
Pseudomonas

ambiguous\_Genus\_of\_Thiotrichaceae  
Lysobacter  
Treponema  
Illumatobacter  
Iamia  
unknown\_Genus\_of\_Acidothermaceae  
Actinomyces  
unknown\_Genus\_of\_Actinopolysporaceae  
Catenulispora  
unknown\_Genus\_of\_Geodermatophilaceae  
Arsenicicoccus  
Tetrasphaera  
Jiangella  
Agromyces  
Leucobacter  
Mycetocola  
Longispora  
unknown\_Genus\_of\_Mycobacteriaceae  
Kribbella  
Nocardioides  
Nocardioides  
Nocardioides  
Nocardioides  
Nocardiopsis  
Nocardiopsis  
Nocardiopsis  
Nocardiopsis  
Nocardiopsis  
Nocardiopsis  
Nocardiopsis  
Nocardiopsis  
unknown\_Genus\_of\_Promicromonosporaceae  
Isoptericola  
Actinomycetospora  
Prauserella  
Pseudonocardia  
Saccharomonospora  
Saccharopolyspora  
Saccharopolyspora  
Saccharopolyspora  
Saccharopolyspora  
Saccharopolyspora  
Streptomyces  
Streptomyces  
Streptomyces  
Streptomyces  
Streptomyces

unknown\_Genus\_of\_Thermomonosporaceae  
unknown\_Genus\_of\_Gaiellaceae  
unknown\_Genus\_of\_Rubrobacteraceae  
Solirubrobacter  
unknown\_Genus\_of\_Marinilabiliaceae  
unknown\_Genus\_of\_Rikenellaceae  
Chryseobacterium  
Flavobacterium  
unknown\_Genus\_of\_Rhabdochlamydiaceae  
unknown\_Genus\_of\_Herpetosiphonaceae  
Bacillus  
Bacillus  
Bacillus  
Bacillus  
Bacillus  
Gracilibacillus  
Marinococcus  
Ornithinibacillus  
Psychrobacillus  
Terribacillus  
Virgibacillus  
unknown\_Genus\_of\_Paenibacillaceae  
ambiguous\_Genus\_of\_Paenibacillaceae  
Planococcus  
Melghirimyces  
Melghirimyces  
Thermoactinomyces  
Thermoactinomyces  
Thermoflavimicrobium  
Enterococcus  
unknown\_Genus\_of\_Leuconostocaceae  
Clostridium  
Acidaminobacter  
Eubacterium  
Roseburia  
Acetivibrio  
Ruminococcus  
Ruminococcus  
Nitrospira  
Bradyrhizobium  
Rhodoblastus  
Salinarimonas  
Rhodoplanes  
Thermovum  
Ensifer(Sinorhizobium)  
Bauldia

Rhodovulum  
Skermanella  
unknown\_Genus\_of\_Holosporaceae  
unknown\_Genus\_of\_Geminicoccus  
Thiobacillus  
unknown\_Genus\_of\_Chromobacteriaceae  
unknown\_Genus\_of\_Desulfonatronumaceae  
unknown\_Genus\_of\_Phaseolicystidaceae  
Hafnia  
Rosenbergiella  
Serratia  
Luteimonas  
Frankia  
unknown\_Genus\_of\_Glycomycetaceae  
Propionibacterium  
Saccharomonospora  
Sanguibacter  
Streptomyces  
Olivibacter  
Lactobacillus  
Jahnella  
Cronobacter  
Serratia  
Pseudomonas  
Pseudoxanthomonas  
Eggerthella  
Rufibacter  
Aequorivita  
Gelidibacter  
Gelidibacter  
Salegentibacter  
Salegentibacter  
Salinimicrobium  
Vitellibacter  
unknown\_Genus\_of\_Ardenticatenaceae  
Lysinibacillus  
Saccharibacillus  
Aureimonas  
Phyllobacterium  
Paracoccus  
Sphingomonas  
Sphingomonas  
Sphingomonas  
Oxalicibacterium  
Aquabacterium  
Tepidiphilus

unknown\_Genus\_of\_Sandaracinaceae  
Rheinheimera  
Citrobacter  
Escherichia  
Pantoea  
Yokenella  
Amphritea  
Pseudomonas  
Pseudomonas  
Thioalkalimicrobium  
unknown\_Genus\_of\_Sinobacteraceae  
Stenotrophomonas  
Opitutus  
Modestobacter  
Kineococcus  
Leifsonia  
Microbacterium  
Arthrobacter  
Yaniella  
Promicromonospora  
ambiguous\_Genus\_of\_Sporichthyaceae  
Patulibacter  
Dyadobacter  
Lishizhenia  
Aquimarina  
Empedobacter  
Flavobacterium  
Flavobacterium  
Galbibacter  
Ulvibacter  
CandidatusRhabdochlamydia  
Paenibacillus  
Salinicoccus  
Shimazuella  
Carnobacterium  
Aureimonas  
Afipia  
Pseudochrobactrum  
Pseudochrobactrum  
Aminobacter  
Sphingobium  
Sphingobium  
Sphingobium  
Advenella  
Bordetella  
Pusillimonas

Comamonas  
Pseudorhodoferax  
Simplicispira  
Variovorax  
Herbaspirillum  
Herbaspirillum  
ambiguous\_Genus\_of\_Bacteriovoracaceae  
unknown\_Genus\_of\_Cystobacteraceae  
Saccharophagus  
unknown\_Genus\_of\_Alteromonadalesgeneraincertaesedis  
Serratia  
unknown\_Genus\_of\_Legionellaceae  
Halomonas  
Halomonas  
Halotalea  
Azotobacter  
Pseudomonas  
Pseudomonas  
Pseudomonas  
Pseudomonas  
unknown\_Genus\_of\_Vibrionaceae  
Luteimonas  
Lysobacter  
unknown\_Genus\_of\_Bryobacter  
Iamia  
ambiguous\_Genus\_of\_Catenulisporaceae  
Cryptosporangium  
Geodermatophilus  
Modestobacter  
Humibacillus  
Tetrasphaera  
ambiguous\_Genus\_of\_Jiangellaceae  
Angustibacter  
Frondihabitans  
Arthrobacter  
Virgisporangium  
ambiguous\_Genus\_of\_Nakamurellaceae  
Rhodococcus  
Nocardioides  
unknown\_Genus\_of\_Nocardiopsaceae  
Nocardiopsis  
Actinoalloteichus  
Actinoalloteichus  
Actinomyces  
Saccharopolyspora  
Streptacidiphilus

Streptomyces  
unknown\_Genus\_of\_unclassifiedPseudonocardineae  
Denitrobacterium  
unknown\_Genus\_of\_Armatimonadaceae  
Cloacibacterium  
Pseudosphingobacterium  
unknown\_Genus\_of\_Roseiflexaceae  
unknown\_Genus\_of\_Spirulinaceae  
Crinalium  
Crinalium  
Bacillus  
Bacillus  
Lysinibacillus  
Oceanobacillus  
Virgibacillus  
Ammoniphilus  
Ammoniphilus  
Paenibacillus  
Paenibacillus  
Sporosarcina  
Leuconostoc  
Clostridium  
Clostridium  
Salimesophilobacter  
Fusibacter  
Eubacterium  
Butyrivibrio  
Lachnobacterium  
Ruminococcus  
Anaerococcus  
Parvularcula  
Methylocella  
Hyphomicrobium  
Methylobacterium  
Microvirga  
Methylarcula  
Pelagibius  
Skermanella  
Sphingomonas  
Sphingomonas  
Polynucleobacter  
Delftia  
Methylibium  
Polaromonas  
Variovorax  
Herminiimonas

Thiobacillus  
Methylobacillus  
Methylobacillus  
CandidatusDactylopiibacterium  
Thauera  
unknown\_Genus\_of\_Desulfuromonadaceae  
Geobacter  
unknown\_Genus\_of\_Anaeromyxobacteraceae  
unknown\_Genus\_of\_Kofleriaceae  
ambiguous\_Genus\_of\_Myxococcaceae  
Microbulbifer  
Microbulbifer  
Trabulsiella  
Yersinia  
Yersinia  
Steroidobacter  
Ignatzschineria  
unknown\_Genus\_of\_Chthoniobacter  
Nesterenkonia  
Prauserella  
Geofilum  
Mariniflexile  
Sediminibacter  
Zobellia  
[Ruminococcus]  
Oscillibacter  
unknown\_Genus\_of\_Oligosphaeraceae  
Pelistega  
Hydrogenophaga  
Thauera  
Arcobacter  
Alcanivorax  
Beggiatoa  
Luteibacter  
Luteimonas  
Arcanobacterium  
Corynebacterium  
Oryzihumus  
Propioniferax  
Rhizobium  
Ketogulonicigenium  
ambiguous\_Genus\_of\_Methylophilaceae  
Desulfovibrio  
unknown\_Genus\_of\_Cardiobacteriaceae  
Dyella  
Fulvimonas



unknown\_Genus\_of\_Mariprofundaceae

Treponema

Beutenbergia

Leifsonia

Microbacterium

Yaniella

Leadbetterella

unknown\_Genus\_of\_Caldilineaceae

Atopostipes

Jeotgalibaca

Trichococcus

Enterococcus

Enterococcus

Devosia

Devosia

Devosia

Loktanella

Rhodovulum

Sphingopyxis

Bordetella

Parapusillimonas

Giesbergeria

Hydrogenophaga

Simplicispira

Vitreoscilla

unknown\_Genus\_of\_Thermithiobacillaceae

Ectothiorhodosinus

Buttiauxella

Enterobacter

Plesiomonas

Legionella

Methylohalobius

Thalassolituus

Perlucidibaca

Pseudomonas

Acholeplasma

Modestobacter

unknown\_Genus\_of\_Jonesiaceae

Labeledella

Rhodococcus

Aeromicrobium

Actinomycetospora

unknown\_Genus\_of\_Ruaniaceae

Sanguibacter

Streptacidiphilus

Streptomyces

unknown\_Genus\_of\_Nitriliruptoraceae  
Bacteroides  
Gilvibacter  
Paenisporosarcina  
unknown\_Genus\_of\_Victivallaceae  
Brevundimonas  
Brevundimonas  
Phenylobacterium  
Bartonella  
Rhodoplanes  
Methylobacterium  
Aliihoeflea  
Rhizobium  
ambiguous\_Genus\_of\_Xanthobacteraceae  
unknown\_Genus\_of\_unclassifiedRhizobiales  
Paracoccus  
Rhodobacter  
Roseococcus  
Sphingomonas  
Stakelama  
Achromobacter  
Oxalicibacterium  
ambiguous\_Genus\_of\_Chromobacteriaceae  
ambiguous\_Genus\_of\_Neisseriaceae  
Marinobacter  
Marinobacter  
Saccharophagus  
unknown\_Genus\_of\_Pseudoalteromonadaceae  
Halomonas  
Haemophilus  
Dasania  
Arenimonas  
Xanthomonas  
unknown\_Genus\_of\_OMGgroup  
unknown\_Genus\_of\_Opitutaceae  
ambiguous\_Genus\_of\_Brevibacteriaceae  
Corynebacterium  
Demequina  
Helcobacillus  
Modestobacter  
Janibacter  
Leifsonia  
Leucobacter  
Microbacterium  
Microbacterium  
Pseudoclavibacter

Pseudoclavibacter  
Arthrobacter  
Arthrobacter  
Micrococcus  
Rothia  
Rothia  
ambiguous\_Genus\_of\_Streptosporangiaceae  
unknown\_Genus\_of\_Hydrogenothermaceae  
Hymenobacter  
Aequorivita  
Chryseobacterium  
Mesonia  
Salegentibacter  
Salinimicrobium  
Sphingobacterium  
unknown\_Genus\_of\_Pseudanabaenaceae  
Bacillus  
Bacillus  
Marinococcus  
Kurthia  
ambiguous\_Genus\_of\_Staphylococcaceae  
Macrococcus  
Salinicoccus  
Salinicoccus  
Facklamia  
Ignavigranum  
Marinilactibacillus  
Bavariicoccus  
unknown\_Genus\_of\_Streptococcaceae  
Lactococcus  
Streptococcus  
Clostridium  
Peptostreptococcus  
Erysipelothrix  
Brevundimonas  
Nitratreductor  
Parvibaculum  
Loktanella

Lautropia  
Lautropia  
Methylophilus  
Methylovorus  
Aquaspirillum  
Alysiella  
Alysiella  
Alysiella  
Bergeriella  
Kingella  
Neisseria  
Neisseria  
Neisseria  
Neisseria  
Uruburuella  
Denitromonas  
Thauera  
Bacteriovorax  
Arcobacter  
Suttonella  
Mangrovibacter  
Photorhabdus  
Xenorhabdus  
Legionella  
Pseudospirillum  
Actinobacillus  
Actinobacillus  
Actinobacillus  
Aggregatibacter  
Avibacterium  
Lonpinella  
Mannheimia  
Pasteurella  
Moraxella  
Moraxella  
Pseudofulvimonas  
Sphaerochaeta  
Sphaerochaeta  
Acholeplasma  
Acholeplasma  
unknown\_Genus\_of\_Spiroplasmataceae  
Corynebacterium  
Blastococcus  
Geodermatophilus  
Jonesia  
Jonesia

Nocardioides  
Pseudonocardia  
Sanguibacter  
Sanguibacter  
Adlercreutzia  
unknown\_Genus\_of\_Prolixibacteraceae  
Cryomorpha  
Flavobacterium  
Flavobacterium  
Flavobacterium  
Mariniflexile  
Mesonia  
Muricauda  
Sediminibacter  
Sphingobacterium  
Psychrobacillus  
Paenibacillus  
Paenibacillus  
Crocino bacterium  
Clostridium  
Mogibacterium  
Alkalibacter  
unknown\_Genus\_of\_Cohaesibacteraceae  
Devosia  
Nitratireductor  
Phyllobacterium  
Neorhizobium  
Rhodoligotrophos  
Xanthobacter  
Hyphomonas  
Amaricoccus  
Roseomonas  
Rickettsia  
Candidimonas  
Pandoraea  
Inhella  
Methylophilus  
Nitrosomonas  
Denitratisoma  
Thauera  
Uliginosibacterium  
Nannocystis  
Rheinheimera  
Enterobacter  
Erwinia  
Salmonella

Serratia  
Methylobacter  
Methylomicrobium  
Perlucidibaca  
Pseudomonas  
Pseudomonas  
Vibrio  
Alkalimonas  
Pyramidobacter  
Tetrasphaera  
Microbacterium  
Murinocardiopsis  
Nocardiopsis  
Promicromonospora  
Promicromonospora  
Streptomyces  
Dyadobacter  
Sarcina  
Rhizobium  
Porphyrobacter  
Hydrogenophaga  
Eionea  
Methylobacter  
Methylosarcina  
Duganella  
Duganella  
Massilia  
Massilia  
Rugamonas  
Serinibacter  
Brevibacterium  
Curtobacterium  
Herbiconiux  
Labedella  
Labedella  
Leifsonia  
Microbacterium  
Microbacterium  
Microbacterium  
Microbacterium  
Mycetocola  
Plantibacter  
Salinibacterium  
Catelliglobospora  
Mycobacterium  
Mycobacterium

Mycobacterium  
Nocardioides  
Amycolatopsis  
Amycolatopsis  
Pseudonocardia  
Pseudonocardia  
Pseudonocardia  
Streptomyces  
Dyadobacter  
Elizabethkingia  
Epilithonimonas  
Flavobacterium  
Flavobacterium  
Mucilaginibacter  
Mucilaginibacter  
Olivibacter  
Parapedobacter  
Pedobacter  
Pedobacter  
Pedobacter  
Pedobacter  
Pedobacter  
Pedobacter  
Pedobacter  
Bacillus  
Bacillus  
Lysinibacillus  
Oceanobacillus  
Ureibacillus  
Weissella  
unknown\_Genus\_of\_Planctomycetaceae  
Methylopila  
Phyllobacterium  
Agrobacterium  
Neorhizobium  
Neorhizobium  
Rhizobium  
Roseomonas  
Novosphingobium  
Sphingomonas  
Achromobacter  
Azohydromonas  
Pigmentiphaga  
Acidovorax  
Caldimonas  
Massilia

Oxalicibacterium  
CandidatusNitrotoga  
unknown\_Genus\_of\_Nannocystaceae  
Arsenophonus  
Enterobacter  
Gibbsiella  
Plesiomonas  
Legionella  
Amphritea  
Enhydrobacter  
Pseudomonas  
Dyella  
Pseudoxanthomonas  
Microbacterium  
Aureimonas  
Methylobacterium  
Rhizobium  
Sphingomonas  
Sphingomonas  
Sphingomonas  
Sphingomonas  
Lautropia  
Acidovorax  
Polaromonas  
Polaromonas  
Oxalicibacterium  
Pantoea  
Acinetobacter  
Leucobacter  
Microbacterium  
Arthrobacter  
Gelidibacter  
Planococcus  
Sporosarcina  
Cucumibacter  
Palleronia  
Herminiimonas  
Arthrobacter  
Promicromonospora  
Bacillus  
Enterobacter  
unknown\_Genus\_of\_Cryptosporangiaceae  
Agreia  
Saccharomonospora  
unknown\_Genus\_of\_Prochlorococcaceae  
Amaricoccus



Rubellimicrobium  
Acidovorax  
unknown\_Genus\_of\_Desulfurellaceae  
Cystobacter  
ambiguous\_Genus\_of\_Polyangiaceae  
Xanthomonas  
Janibacter  
Microbacterium  
Tessaracoccus  
unknown\_Genus\_of\_Sanguibacteraceae  
Sanguibacter  
Sporichthya  
Sporichthya  
Flavobacterium  
Haloanella  
unknown\_Genus\_of\_Parachlamydiaceae  
unknown\_Genus\_of\_Chlorobiaceae  
ambiguous\_Genus\_of\_ClostridialesFamilyXIX.IncertaeSedis  
Fusobacterium  
Phenylobacterium  
Bartonella  
Beijerinckia  
Bosea  
Aminobacter  
Phyllobacterium  
Agrobacterium  
Vasilyevaea  
Erythrobacter  
Novosphingobium  
Bilophila  
Cystobacter  
Pseudomonas  
Lysobacter  
Luteolibacter  
unknown\_Genus\_of\_Brevibacteriaceae  
Microbacterium  
Microbacterium  
Isoptericola  
Parapedobacter  
Parapedobacter  
Sphingopyxis  
Thiobacillus  
Pseudoalteromonas  
Pseudoalteromonas  
Marinomonas  
Clostridium

unknown\_Genus\_of\_Jiangellaceae

Jiangella

Pseudokineococcus

Nocardiopsis

Lentzea

Pseudonocardia

Streptomyces

Petrimonas

Hymenobacter

Tumebacillus

ambiguous\_Genus\_of\_Bacillalesincertaesedis

Planifilum

Planifilum

Planifilum

Planifilum

Planifilum

Streptococcus

Pirellula

Mycoplana

ambiguous\_Genus\_of\_Cohaesibacteraceae

Rhizobium

Roseomonas

Altererythrobacter

Croceicoccus

Erythrobacter

Sandaracinobacter

Sphingomonas

Eoetvoesia

Brachymonas

Comamonas

Hydrogenophaga

Pelomonas

Massilia

Massilia

Thiobacillus

Azovibrio

ambiguous\_Genus\_of\_Cystobacteraceae

Archangium

Methylobacter

Georgenia

Demetria

Frondihabitans

Salinibacterium

Arthrobacter

Citricoccus

Citricoccus

Kocuria  
Kocuria  
Streptomyces  
Flavobacterium  
Gelidibacter  
Arcticibacter  
Planomicrobium  
Enterococcus  
Clostridium  
Bosea  
Mycoplana  
Jannaschia  
Jannaschia  
Roseovarius  
Sphingobium  
Simplicispira  
Variovorax  
Thauera  
Escherichia  
Cellulomonas  
Oerskovia  
Leifsonia  
Ruania  
Algibacter  
unknown\_Genus\_of\_Anaerolineaceae  
unknown\_Genus\_of\_Thermosporotrichaceae  
unknown\_Genus\_of\_Trueperaceae  
unknown\_Genus\_of\_Pasteuriaceae  
unknown\_Genus\_of\_ClostridialesFamilyXVII.IncertaeSedis  
unknown\_Genus\_of\_Heliobacteriaceae  
unknown\_Genus\_of\_Thermoanaerobacteraceae  
unknown\_Genus\_of\_Phycisphaeraceae  
Brevundimonas  
unknown\_Genus\_of\_Bartonellaceae  
unknown\_Genus\_of\_Brucellaceae  
Devosia  
Hyphomicrobium  
Mesorhizobium  
Nitratireductor  
Kaistia  
Rhizobium  
Shinella  
Sinorhizobium  
Parvibaculum  
Rhizobium  
Ketogulonicigenium

Paracoccus  
unknown\_Genus\_of\_Sneathiellaceae  
Altererythrobacter  
Castellaniella  
Castellaniella  
Brachymonas  
Comamonas  
unknown\_Genus\_of\_Methylophilaceae  
Bacteriovorax  
Bacteriovorax  
unknown\_Genus\_of\_Desulfohalobiaceae  
Cystobacter  
Melittangium  
Nannocystis  
unknown\_Genus\_of\_Granulosicoccaceae  
ambiguous\_Genus\_of\_Halothiobacillaceae  
Legionella  
Kangiella  
Pseudomonas  
unknown\_Genus\_of\_Salinisphaeraceae  
Dokdonella  
Acholeplasma  
Acholeplasma  
Acholeplasma  
Opitutus  
Arthrobacter  
Streptomyces  
Formosa  
Kinneretia  
Bdellovibrio  
Bdellovibrio  
Psychrobacter  
Streptomyces  
Williamsia  
Wautersiella  
Shimazuella  
Abiotrophia  
Ochrobactrum  
Paenochrobactrum  
Pseudochrobactrum  
Donghicola  
Alcaligenes  
Bordetella  
Paenalcaligenes  
ambiguous\_Genus\_of\_Aeromonadaceae  
Zobellella

Raoultella  
Methylophaga  
Ignatzschineria  
Ignatzschineria  
Salinibacterium  
Micropruina  
Clostridium  
Clostridium  
Microvirga  
ambiguous\_Genus\_of\_Rhodospirillaceae  
Sulfurimonas  
Escherichia  
Edaphobacter  
Edaphobacter  
Edaphobacter  
Nocardia  
Streptomyces  
Pedobacter  
Hydrogenophaga  
ambiguous\_Genus\_of\_Nitrosomonadaceae  
Flavobacterium  
Caulobacter  
Corynebacterium  
Kineococcus  
Flavobacterium  
Flavisolibacter  
Phormidium  
Carnobacterium  
Methylobacterium  
Rubellimicrobium  
unknown\_Genus\_of\_Anaplasmataceae  
Tepidimonas  
Aeromicrobium  
Amycolatopsis  
Thermocrispum  
Hymenobacter  
Sphingobacterium  
Brevibacillus  
Polycladomyces  
Polycladomyces  
Agaricola  
Roseomonas  
Kaistobacter  
Uliginosibacterium  
Kluyvera  
Olivibacter

Oxalobacter  
Enterobacter  
Corynebacterium  
Prevotella  
Pleomorphomonas  
Phyllobacterium  
Kaistia  
Pseudorhodobacter  
Phaeospirillum  
Pusillimonas  
Nitrosomonas  
Solimonas  
Leucobacter  
Pseudoclavibacter  
Arthrobacter  
Arthrobacter  
Micromonospora  
Micromonospora  
Pseudonocardia  
Streptomyces  
Streptomyces  
Algoriphagus  
Algoriphagus  
Bergeyella  
Planomicrobium  
Martelella  
Bartonella  
Campylobacter  
Eschericia/Shigella  
Rickettsiella  
Pseudomonas  
Luteimonas  
unknown\_Genus\_of\_Alkalimonas  
Corynebacterium  
Citricoccus  
Marmoricola  
Saccharomonospora  
Bizionia  
Flavobacterium  
Bhargavaea  
Bhargavaea  
Brevibacillus  
Salinicoccus  
Bradyrhizobium  
Mycoplana  
Methylobacterium

Thioclava  
Methylothera  
ambiguous\_Genus\_of\_Sulfuricellaceae  
Aeromonas  
Enterobacter  
Rickettsiella  
Methylotherium  
Nicoletella  
Varibaculum  
Corynebacterium  
Blastococcus  
Modestobacter  
Marinactinospora  
Spinactinospora  
Prevotella  
Paenibacillus  
Belnapia  
Ralstonia  
Aeromonas  
Aeromonas  
Arthrobacter  
Streptomyces  
Luteibacter

| Species                              | CS_242 | CS_249 |
|--------------------------------------|--------|--------|
| unknown_Genus_of_Acidobacteriaceae   | 196    | 0      |
| unknown_Genus_of_Microthrixaceae     | 51     | 0      |
| unknown_Genus_of_Acidimicrobiaceae   | 283    | 21     |
| unknown_Species_of_Aciditerrimonas   | 139    | 0      |
| Aciditerrimonas sp.                  | 189    | 0      |
| unknown_Species_of_Illumatobacter    | 318    | 0      |
| unknown_Genus_of_Iamiaceae           | 279    | 0      |
| unknown_Genus_of_Actinomycetaceae    | 0      | 0      |
| unknown_Genus_of_Beutenbergiaceae    | 27     | 49     |
| ambiguous_Genus_of_Beutenbergiaceae  | 106    | 75     |
| unknown_Species_of_Beutenbergia      | 11     | 17     |
| unknown_Species_of_Salana            | 0      | 0      |
| unknown_Genus_of_Bogoriellaceae      | 22     | 0      |
| unknown_Species_of_Georgenia         | 0      | 0      |
| Georgenia deserti                    | 0      | 0      |
| Georgenia sp.                        | 59     | 0      |
| ambiguous_Species_of_Brevibacterium  | 1223   | 36     |
| Brevibacterium jeotgali              | 121    | 0      |
| Brevibacterium linens                | 11     | 0      |
| ambiguous_Genus_of_Cellulomonadaceae | 260    | 0      |
| unknown_Species_of_Cellulomonas      | 0      | 12     |
| ambiguous_Species_of_Cellulomonas    | 0      | 0      |
| Cellulomonas cellasea                | 0      | 0      |
| Cellulomonas flavigena               | 0      | 0      |
| unknown_Species_of_Corynebacterium   | 1402   | 60     |
| ambiguous_Species_of_Corynebacterium | 458    | 11     |
| Corynebacterium casei                | 262    | 10     |
| Corynebacterium deserti              | 132    | 28     |
| Corynebacterium glutamicum           | 340    | 12     |
| Corynebacterium halotolerans         | 26     | 12     |
| Corynebacterium marinum              | 26     | 13     |
| Corynebacterium maris                | 61     | 0      |
| Corynebacterium stationis            | 1191   | 403    |
| ambiguous_Genus_of_Demequinaceae     | 32     | 0      |
| unknown_Species_of_Demequina         | 24     | 0      |
| Demequina aestuarii                  | 0      | 0      |
| unknown_Genus_of_Dermabacteraceae    | 0      | 0      |
| ambiguous_Genus_of_Dermabacteraceae  | 347    | 23     |
| unknown_Species_of_Brachybacterium   | 121    | 0      |
| ambiguous_Species_of_Brachybacterium | 2234   | 275    |
| Brachybacterium conglomeratum        | 36     | 11     |



|                                         |      |     |
|-----------------------------------------|------|-----|
| Brachybacterium paraconglomeratum       | 43   | 20  |
| Brachybacterium saurashtrense           | 73   | 12  |
| Brachybacterium sp.                     | 83   | 14  |
| Brachybacterium squillarum              | 3178 | 68  |
| Brachybacterium tyrofermentans          | 221  | 0   |
| unknown_Genus_of_Dermacoccaceae         | 0    | 0   |
| ambiguous_Genus_of_Dermacoccaceae       | 283  | 0   |
| unknown_Genus_of_Dermatophilaceae       | 48   | 26  |
| unknown_Species_of_Austwickia           | 28   | 0   |
| unknown_Species_of_Dermatophilus        | 0    | 31  |
| unknown_Species_of_Kineosphaera         | 0    | 0   |
| unknown_Species_of_Mobilicoccus         | 38   | 11  |
| Mobilicoccus pelagius                   | 304  | 30  |
| unknown_Species_of_Piscicoccus          | 0    | 0   |
| Piscicoccus intestinalis                | 0    | 0   |
| unknown_Species_of_Tonsilliphilus       | 11   | 29  |
| ambiguous_Genus_of_Dietziaceae          | 12   | 0   |
| ambiguous_Species_of_Dietzia            | 657  | 141 |
| Dietzia alimentaria                     | 171  | 20  |
| Dietzia cinnamea                        | 31   | 10  |
| Dietzia maris                           | 10   | 0   |
| Dietzia sp.                             | 0    | 0   |
| unknown_Genus_of_Frankiaceae            | 35   | 0   |
| ambiguous_Genus_of_Geodermatophilaceae  | 73   | 0   |
| unknown_Species_of_Blastococcus         | 0    | 0   |
| ambiguous_Species_of_Blastococcus       | 61   | 10  |
| Blastococcus aggregatus                 | 0    | 0   |
| Blastococcus endophyticus               | 11   | 0   |
| Blastococcus saxosidens                 | 0    | 0   |
| Geodermatophilus terrae                 | 42   | 0   |
| unknown_Genus_of_Intrasporangiaceae     | 222  | 137 |
| ambiguous_Genus_of_Intrasporangiaceae   | 3740 | 190 |
| Aquipuribacter hungaricus               | 44   | 37  |
| Janibacter limosus                      | 20   | 0   |
| Janibacter melonis                      | 0    | 14  |
| Janibacter sp.                          | 33   | 0   |
| Janibacter terrae                       | 55   | 0   |
| Knoellia aerolata                       | 102  | 0   |
| Knoellia subterranea                    | 40   | 0   |
| unknown_Species_of_Kribbia              | 0    | 0   |
| Kribbia sp.                             | 87   | 106 |
| Ornithinibacter aureus                  | 111  | 0   |
| unknown_Species_of_Ornithinicoccus      | 63   | 0   |
| Ornithinicoccus hortensis               | 23   | 0   |
| unknown_Species_of_Ornithinimicrobium   | 70   | 112 |
| ambiguous_Species_of_Ornithinimicrobium | 1175 | 387 |

|                                      |      |      |
|--------------------------------------|------|------|
| Ornithinimicrobium murale            | 59   | 0    |
| Ornithinimicrobium sp.               | 414  | 0    |
| unknown_Species_of_Serinicoccus      | 93   | 0    |
| Serinicoccus profundus               | 0    | 0    |
| Serinicoccus sp.                     | 1035 | 247  |
| unknown_Species_of_Terrabacter       | 131  | 190  |
| Terrabacter sp.                      | 0    | 0    |
| unknown_Species_of_Tetrasphaera      | 27   | 0    |
| ambiguous_Species_of_Tetrasphaera    | 0    | 0    |
| Tetrasphaera australiensis           | 106  | 0    |
| Tetrasphaera remsis                  | 312  | 0    |
| ambiguous_Genus_of_Kineosporiaceae   | 66   | 0    |
| ambiguous_Genus_of_Microbacteriaceae | 6411 | 1655 |
| unknown_Species_of_Agrococcus        | 0    | 0    |
| ambiguous_Species_of_Agrococcus      | 644  | 658  |
| Agrococcus baldri                    | 88   | 0    |
| Agrococcus casei                     | 0    | 0    |
| Agrococcus citreus                   | 21   | 80   |
| Agrococcus jejuensis                 | 97   | 10   |
| Agrococcus lahaulensis               | 42   | 14   |
| Agrococcus sp.                       | 0    | 0    |
| Agrococcus terreus                   | 0    | 0    |
| Agrococcus versicolor                | 36   | 0    |
| Clavibacter michiganensis            | 115  | 124  |
| ambiguous_Species_of_Curtobacterium  | 156  | 253  |
| Frigoribacterium faeni               | 421  | 130  |
| Frigoribacterium sp.                 | 230  | 69   |
| ambiguous_Species_of_Leucobacter     | 0    | 0    |
| unknown_Species_of_Microbacterium    | 103  | 0    |
| ambiguous_Species_of_Microbacterium  | 532  | 870  |
| Microbacterium ginsengisoli          | 320  | 0    |
| Microbacterium hatanonis             | 0    | 13   |
| Microbacterium murale                | 45   | 0    |
| Microbacterium profundus             | 112  | 0    |
| Microbacterium pygmaeum              | 0    | 0    |
| Microbacterium testaceum             | 13   | 35   |
| Okibacterium fritillariae            | 0    | 108  |
| unknown_Species_of_Plantibacter      | 125  | 375  |
| Pseudoclavibacter helvolus           | 25   | 0    |
| ambiguous_Species_of_Rathayibacter   | 702  | 386  |
| Rathayibacter festucae               | 66   | 27   |
| Rathayibacter iranicus               | 60   | 10   |
| unknown_Genus_of_Micrococcaceae      | 80   | 10   |
| ambiguous_Genus_of_Micrococcaceae    | 5297 | 256  |
| unknown_Species_of_Arthrobacter      | 76   | 0    |
| ambiguous_Species_of_Arthrobacter    | 884  | 51   |

|                                         |      |     |
|-----------------------------------------|------|-----|
| Arthrobacter roseus                     | 36   | 0   |
| unknown_Species_of_Enteractinococcus    | 684  | 0   |
| Enteractinococcus coprophilus           | 685  | 0   |
| ambiguous_Species_of_Kocuria            | 1938 | 149 |
| Kocuria carniphila                      | 62   | 0   |
| Kocuria flava                           | 354  | 0   |
| Kocuria marina                          | 0    | 0   |
| Kocuria palustris                       | 33   | 0   |
| Kocuria rosea                           | 0    | 0   |
| Microbispora rosea                      | 0    | 0   |
| ambiguous_Species_of_Micrococcus        | 166  | 0   |
| Micrococcus lactis                      | 43   | 0   |
| Micrococcus terreus                     | 33   | 0   |
| Yaniella fodinae                        | 88   | 0   |
| Yaniella sp.                            | 365  | 0   |
| unknown_Genus_of_Micromonosporaceae     | 34   | 0   |
| ambiguous_Genus_of_Micromonosporaceae   | 77   | 0   |
| Motilibacter peucedani                  | 0    | 0   |
| Motilibacter rhizosphaerae              | 0    | 0   |
| unknown_Genus_of_Nocardiaceae           | 0    | 0   |
| ambiguous_Genus_of_Nocardiaceae         | 42   | 333 |
| unknown_Species_of_Rhodococcus          | 0    | 0   |
| ambiguous_Species_of_Rhodococcus        | 456  | 154 |
| Rhodococcus corynebacterioides          | 94   | 0   |
| Rhodococcus fascians                    | 86   | 71  |
| unknown_Genus_of_Nocardioidaceae        | 461  | 32  |
| ambiguous_Genus_of_Nocardioidaceae      | 490  | 0   |
| ambiguous_Species_of_Aeromicrobium      | 336  | 0   |
| Aeromicrobium erythreum                 | 96   | 0   |
| Aeromicrobium ponti                     | 53   | 0   |
| ambiguous_Species_of_Marmoricola        | 84   | 0   |
| unknown_Species_of_Nocardioides         | 167  | 0   |
| ambiguous_Species_of_Nocardioides       | 669  | 10  |
| Nocardioides alkalitolerans             | 54   | 0   |
| Nocardioides daphniae                   | 129  | 0   |
| unknown_Genus_of_Propionibacteriaceae   | 139  | 35  |
| ambiguous_Genus_of_Propionibacteriaceae | 86   | 62  |
| unknown_Species_of_Aestuariimicrobium   | 0    | 0   |
| unknown_Species_of_Luteococcus          | 0    | 0   |
| Luteococcus peritonei                   | 0    | 0   |
| Propionibacterium acnes                 | 1143 | 0   |
| Tessaracoccus lubricantis               | 0    | 0   |
| Tessaracoccus oleiagri                  | 10   | 17  |
| Tessaracoccus sp.                       | 0    | 0   |
| unknown_Genus_of_Pseudonocardiaceae     | 304  | 44  |
| ambiguous_Species_of_Prauserella        | 226  | 52  |

|                                        |       |      |
|----------------------------------------|-------|------|
| Prauserella rugosa                     | 198   | 82   |
| unknown_Species_of_Saccharopolyspora   | 1729  | 149  |
| ambiguous_Species_of_Saccharopolyspora | 6686  | 693  |
| Saccharopolyspora tripterygii          | 10715 | 0    |
| Haloactinobacterium album              | 43    | 0    |
| ambiguous_Genus_of_Sanguibacteraceae   | 323   | 282  |
| ambiguous_Species_of_Sanguibacter      | 463   | 576  |
| Sanguibacter inulinus                  | 0     | 62   |
| Sanguibacter sp.                       | 0     | 0    |
| unknown_Genus_of_Segniliparaceae       | 10    | 0    |
| unknown_Genus_of_Sporichthyaceae       | 41    | 0    |
| Sporichthya sp.                        | 0     | 0    |
| unknown_Genus_of_Streptomycetaceae     | 10    | 0    |
| ambiguous_Genus_of_Streptomycetaceae   | 1233  | 0    |
| unknown_Species_of_Streptomyces        | 95    | 0    |
| Streptomyces avicenniae                | 218   | 64   |
| unknown_Genus_of_Streptosporangiaceae  | 76    | 0    |
| unknown_Genus_of_Coriobacteriaceae     | 85    | 0    |
| unknown_Genus_of_Conexibacteraceae     | 0     | 0    |
| unknown_Genus_of_Thermoleophilaceae    | 12    | 0    |
| unknown_Genus_of_Rhodothermaceae       | 22    | 0    |
| unknown_Genus_of_Porphyrimonadaceae    | 448   | 10   |
| unknown_Genus_of_Cyclobacteriaceae     | 0     | 60   |
| ambiguous_Genus_of_Cyclobacteriaceae   | 0     | 0    |
| unknown_Species_of_Algoriphagus        | 0     | 32   |
| unknown_Species_of_Echinicola          | 0     | 0    |
| unknown_Genus_of_Cytophagaceae         | 53    | 78   |
| ambiguous_Genus_of_Cytophagaceae       | 0     | 0    |
| unknown_Species_of_Adhaeribacter       | 65    | 11   |
| Adhaeribacter aerophilus               | 0     | 0    |
| Adhaeribacter aquaticus                | 13    | 0    |
| Adhaeribacter terreus                  | 0     | 74   |
| unknown_Species_of_Pontibacter         | 0     | 13   |
| Rufibacter tibetensis                  | 0     | 0    |
| unknown_Genus_of_Flammeovirgaceae      | 0     | 0    |
| unknown_Species_of_Fluviicola          | 254   | 0    |
| unknown_Genus_of_Flavobacteriaceae     | 5469  | 855  |
| ambiguous_Genus_of_Flavobacteriaceae   | 2404  | 1634 |
| unknown_Species_of_Aequorivita         | 15    | 10   |
| Aequorivita antarctica                 | 0     | 0    |
| Bergeyella sp.                         | 0     | 0    |
| unknown_Species_of_Chryseobacterium    | 650   | 1072 |
| ambiguous_Species_of_Chryseobacterium  | 51    | 290  |
| Chryseobacterium antarcticum           | 0     | 46   |
| Chryseobacterium anthropi              | 0     | 29   |
| Chryseobacterium haifense              | 439   | 187  |

|                                          |      |      |
|------------------------------------------|------|------|
| Chryseobacterium koreense                | 220  | 85   |
| Chryseobacterium sp.                     | 254  | 687  |
| unknown_Species_of_Empedobacter          | 0    | 0    |
| Empedobacter sp.                         | 0    | 0    |
| ambiguous_Species_of_Epilithonimonas     | 0    | 122  |
| unknown_Species_of_Flavobacterium        | 1822 | 599  |
| ambiguous_Species_of_Flavobacterium      | 96   | 154  |
| Flavobacterium anatoliense               | 550  | 0    |
| Flavobacterium araucananum               | 111  | 0    |
| Flavobacterium cheniae                   | 0    | 0    |
| Flavobacterium cheonanense               | 24   | 37   |
| Flavobacterium hercynium                 | 86   | 0    |
| Flavobacterium pectinovorum              | 15   | 0    |
| Flavobacterium sp.                       | 89   | 704  |
| Flavobacterium succinicans               | 272  | 0    |
| unknown_Species_of_Gillisia              | 0    | 0    |
| Gillisia limnaea                         | 0    | 11   |
| Gillisia sp.                             | 67   | 64   |
| unknown_Species_of_Myroides              | 249  | 16   |
| unknown_Species_of_Salinimicrobium       | 17   | 0    |
| unknown_Species_of_Ulvibacter            | 0    | 0    |
| unknown_Species_of_Vitellibacter         | 16   | 11   |
| Wautersiella sp.                         | 99   | 273  |
| unknown_Genus_of_Chitinophagaceae        | 13   | 0    |
| unknown_Genus_of_Sphingobacteriaceae     | 1806 | 671  |
| ambiguous_Genus_of_Sphingobacteriaceae   | 27   | 155  |
| Mucilaginibacter sp.                     | 10   | 0    |
| unknown_Species_of_Pedobacter            | 402  | 928  |
| ambiguous_Species_of_Pedobacter          | 63   | 631  |
| Pedobacter agri                          | 0    | 333  |
| Pedobacter bauzanensis                   | 11   | 170  |
| Pedobacter metabolipauper                | 39   | 68   |
| Pedobacter oryzae                        | 0    | 0    |
| Pedobacter sp.                           | 51   | 64   |
| unknown_Species_of_Sphingobacterium      | 433  | 116  |
| Sphingobacterium alimentarium            | 54   | 183  |
| Sphingobacterium sp.                     | 58   | 118  |
| Sphingobacterium wenxiniae               | 0    | 0    |
| unknown_Genus_of_Waddliaceae             | 0    | 27   |
| unknown_Genus_of_Ardenscatenaceae        | 204  | 0    |
| unknown_Genus_of_Thermogemmatissporaceae | 20   | 131  |
| unknown_Genus_of_Sphaerobacteraceae      | 152  | 46   |
| unknown_Genus_of_Gloeobacteraceae        | 178  | 137  |
| unknown_Genus_of_Nostocaceae             | 1312 | 2321 |
| Deinococcus geothermalis                 | 0    | 0    |
| unknown_Genus_of_Bacillaceae             | 4368 | 315  |

|                                      |       |     |
|--------------------------------------|-------|-----|
| ambiguous_Genus_of_Bacillaceae       | 10586 | 424 |
| Amphibacillus indicireducens         | 366   | 0   |
| Amphibacillus xylanus                | 10    | 0   |
| unknown_Species_of_Bacillus          | 1447  | 0   |
| ambiguous_Species_of_Bacillus        | 16880 | 68  |
| Bacillus sp.                         | 276   | 0   |
| Bacillus weihenstephanensis          | 80    | 41  |
| unknown_Species_of_Oceanobacillus    | 1045  | 0   |
| unknown_Species_of_Ornithinibacillus | 235   | 0   |
| Virgibacillus soli                   | 52    | 0   |
| Gemella palaticanis                  | 0     | 0   |
| unknown_Genus_of_Planococcaceae      | 1909  | 17  |
| ambiguous_Genus_of_Planococcaceae    | 5365  | 927 |
| Caryophanon latum                    | 274   | 118 |
| ambiguous_Species_of_Kurthia         | 170   | 0   |
| Kurthia massiliensis                 | 451   | 0   |
| Kurthia zopfii                       | 1985  | 42  |
| ambiguous_Species_of_Planomicrobium  | 95    | 0   |
| Planomicrobium flavidum              | 105   | 0   |
| Planomicrobium okeanokoites          | 274   | 0   |
| Planomicrobium sp.                   | 113   | 0   |
| ambiguous_Species_of_Jeotgalicoccus  | 131   | 0   |
| Jeotgalicoccus coquinae              | 497   | 0   |
| Jeotgalicoccus halotolerans          | 111   | 0   |
| Jeotgalicoccus psychrophilus         | 43    | 0   |
| Jeotgalicoccus sp.                   | 52    | 48  |
| ambiguous_Species_of_Staphylococcus  | 4715  | 81  |
| Staphylococcus equorum               | 321   | 0   |
| Staphylococcus fleurettii            | 145   | 0   |
| Staphylococcus saprophyticus         | 194   | 0   |
| Staphylococcus sciuri                | 1380  | 224 |
| Staphylococcus succinus              | 996   | 11  |
| Staphylococcus vitulinus             | 202   | 0   |
| Staphylococcus warneri               | 77    | 0   |
| Staphylococcus xylosus               | 291   | 55  |
| unknown_Genus_of_Aerococcaceae       | 286   | 0   |
| ambiguous_Genus_of_Aerococcaceae     | 383   | 0   |
| Aerococcus urinaeequi                | 1028  | 14  |
| unknown_Species_of_Facklamia         | 348   | 24  |
| Facklamia tabacinasalis              | 363   | 96  |
| unknown_Genus_of_Carnobacteriaceae   | 2823  | 0   |
| unknown_Species_of_Atopostipes       | 6517  | 0   |
| ambiguous_Species_of_Trichococcus    | 80    | 0   |
| Weissella confusa                    | 830   | 28  |
| ambiguous_Species_of_Streptococcus   | 413   | 44  |
| Streptococcus equinus                | 49    | 11  |

|                                                        |      |     |
|--------------------------------------------------------|------|-----|
| unknown_Genus_of_Clostridiaceae                        | 1193 | 471 |
| ambiguous_Genus_of_Clostridiaceae                      | 1526 | 36  |
| unknown_Species_of_Clostridium                         | 155  | 29  |
| ambiguous_Species_of_Clostridium                       | 1355 | 0   |
| ambiguous_Species_of_Sarcina                           | 0    | 0   |
| unknown_Genus_of_ClostridialesFamilyXII.IncertaeSedis  | 0    | 36  |
| unknown_Genus_of_ClostridialesFamilyXIII.IncertaeSedis | 260  | 0   |
| unknown_Species_of_Anaerostipes                        | 169  | 0   |
| unknown_Genus_of_Peptococcaceae                        | 10   | 0   |
| unknown_Genus_of_Peptostreptococcaceae                 | 80   | 0   |
| unknown_Species_of_Peptostreptococcus                  | 0    | 0   |
| unknown_Genus_of_Ruminococcaceae                       | 1236 | 50  |
| unknown_Genus_of_Syntrophomonadaceae                   | 0    | 0   |
| unknown_Genus_of_Natranaerobiaceae                     | 51   | 0   |
| unknown_Genus_of_Gemmatimonadaceae                     | 53   | 0   |
| unknown_Genus_of_Ignavibacteriaceae                    | 0    | 0   |
| unknown_Genus_of_Nitrospinaceae                        | 0    | 0   |
| unknown_Genus_of_Caulobacteraceae                      | 37   | 0   |
| ambiguous_Genus_of_Caulobacteraceae                    | 1228 | 596 |
| unknown_Species_of_Asticcacaulis                       | 0    | 0   |
| Asticcacaulis biprosthecium                            | 0    | 0   |
| Asticcacaulis excentricus                              | 0    | 0   |
| Asticcacaulis sp.                                      | 11   | 0   |
| ambiguous_Species_of_Brevundimonas                     | 605  | 558 |
| Brevundimonas alba                                     | 0    | 0   |
| Brevundimonas bullata                                  | 0    | 61  |
| Brevundimonas diminuta                                 | 193  | 0   |
| Brevundimonas faecalis                                 | 242  | 10  |
| Brevundimonas halotolerans                             | 0    | 23  |
| Brevundimonas lenta                                    | 52   | 0   |
| Brevundimonas poindexterae                             | 0    | 0   |
| Brevundimonas sp.                                      | 0    | 0   |
| Brevundimonas staley                                   | 12   | 0   |
| Brevundimonas subvibrioides                            | 42   | 30  |
| Brevundimonas terrae                                   | 242  | 72  |
| Brevundimonas variabilis                               | 0    | 0   |
| unknown_Species_of_Caulobacter                         | 0    | 0   |
| Caulobacter daechungensis                              | 0    | 0   |
| ambiguous_Species_of_Phenylobacterium                  | 12   | 0   |
| ambiguous_Genus_of_Aurantimonadaceae                   | 48   | 0   |
| unknown_Species_of_Aurantimonas                        | 0    | 78  |
| Aurantimonas sp.                                       | 63   | 117 |
| Aureimonas ferruginea                                  | 57   | 58  |
| Aureimonas jatrophae                                   | 123  | 73  |
| unknown_Genus_of_Beijerinckiaceae                      | 15   | 0   |
| ambiguous_Genus_of_Beijerinckiaceae                    | 0    | 0   |

|                                        |     |      |
|----------------------------------------|-----|------|
| unknown_Species_of_Chelatococcus       | 0   | 28   |
| unknown_Species_of_Methylocapsa        | 0   | 0    |
| unknown_Genus_of_Bradyrhizobiaceae     | 0   | 0    |
| ambiguous_Genus_of_Bradyrhizobiaceae   | 572 | 767  |
| ambiguous_Species_of_Bosea             | 27  | 12   |
| Bosea lathyri                          | 25  | 14   |
| ambiguous_Genus_of_Brucellaceae        | 0   | 10   |
| unknown_Species_of_Daeguia             | 0   | 20   |
| unknown_Species_of_Ochrobactrum        | 21  | 0    |
| ambiguous_Species_of_Pseudochrobactrum | 10  | 37   |
| unknown_Genus_of_Hyphomicrobiaceae     | 132 | 30   |
| ambiguous_Genus_of_Hyphomicrobiaceae   | 302 | 80   |
| unknown_Species_of_Devosia             | 10  | 257  |
| ambiguous_Species_of_Devosia           | 242 | 250  |
| Devosia chinhatensis                   | 0   | 20   |
| Devosia crocina                        | 0   | 0    |
| Devosia geojensis                      | 0   | 0    |
| Devosia glacialis                      | 0   | 55   |
| Devosia limi                           | 0   | 0    |
| Devosia neptuniae                      | 0   | 0    |
| Devosia psychrophila                   | 41  | 72   |
| Devosia riboflavina                    | 0   | 0    |
| Devosia soli                           | 0   | 37   |
| Devosia sp.                            | 67  | 411  |
| Devosia subaequoris                    | 0   | 0    |
| Devosia submarina                      | 0   | 0    |
| Pelagibacterium halotolerans           | 12  | 11   |
| Pelagibacterium luteolum               | 0   | 0    |
| ambiguous_Species_of_Methylobacterium  | 811 | 1288 |
| Methylobacterium adhaesivum            | 0   | 183  |
| Methylobacterium bullatum              | 0   | 52   |
| Methylobacterium goesingense           | 41  | 291  |
| Methylobacterium marchantiae           | 25  | 115  |
| ambiguous_Genus_of_Methylocystaceae    | 13  | 0    |
| unknown_Species_of_Methylocystis       | 0   | 0    |
| unknown_Species_of_Methylosinus        | 0   | 0    |
| unknown_Genus_of_Phylobacteriaceae     | 0   | 0    |
| ambiguous_Genus_of_Phylobacteriaceae   | 150 | 104  |
| ambiguous_Species_of_Aminobacter       | 0   | 0    |
| ambiguous_Species_of_Aquamicrobium     | 0   | 11   |
| Aquamicrobium aerolatum                | 0   | 0    |
| Hoeflea alexandrii                     | 0   | 0    |
| unknown_Species_of_Mesorhizobium       | 0   | 0    |
| ambiguous_Species_of_Mesorhizobium     | 0   | 0    |
| Mesorhizobium camelthorni              | 0   | 0    |
| Mesorhizobium chacoense                | 0   | 0    |



|                                       |      |      |
|---------------------------------------|------|------|
| Mesorhizobium plurifarum              | 67   | 34   |
| Mesorhizobium sp.                     | 0    | 0    |
| ambiguous_Species_of_Nitratireductor  | 0    | 0    |
| Nitratireductor pacificus             | 0    | 0    |
| Phyllobacterium leguminum             | 0    | 24   |
| Phyllobacterium sp.                   | 0    | 42   |
| Pseudaminobacter salicylatoxidans     | 0    | 0    |
| unknown_Genus_of_Rhizobiaceae         | 0    | 0    |
| ambiguous_Genus_of_Rhizobiaceae       | 1128 | 1163 |
| ambiguous_Species_of_Kaistia          | 11   | 46   |
| unknown_Species_of_Rhizobium          | 29   | 0    |
| ambiguous_Species_of_Rhizobium        | 473  | 1619 |
| Rhizobium giardinii                   | 0    | 0    |
| Rhizobium selenitireducens            | 0    | 0    |
| Rhizobium skierniewicense             | 35   | 155  |
| Rhizobium soli                        | 202  | 1697 |
| Rhizobium sp.                         | 0    | 211  |
| Rhizobium sphaerophysae               | 22   | 0    |
| Shinella sp.                          | 0    | 0    |
| unknown_Genus_of_Rhodobiaceae         | 53   | 0    |
| ambiguous_Genus_of_Rhodobiaceae       | 0    | 0    |
| Labrys wisconsinensis                 | 0    | 0    |
| Vasilyevaea enhydra                   | 10   | 0    |
| unknown_Genus_of_Hyphomonadaceae      | 207  | 92   |
| unknown_Genus_of_Rhodobacteraceae     | 810  | 830  |
| ambiguous_Genus_of_Rhodobacteraceae   | 1373 | 671  |
| unknown_Species_of_Citreicella        | 219  | 25   |
| unknown_Species_of_Gemmobacter        | 71   | 28   |
| Gemmobacter sp.                       | 206  | 104  |
| Gemmobacter tilapiae                  | 0    | 0    |
| unknown_Species_of_Jannaschia         | 0    | 0    |
| Jannaschia rubra                      | 0    | 0    |
| Ketogulonicigenium robustum           | 96   | 43   |
| ambiguous_Species_of_Loktanella       | 148  | 0    |
| unknown_Species_of_Natronohydrobacter | 208  | 0    |
| unknown_Species_of_Oceaniovalibus     | 0    | 0    |
| unknown_Species_of_Paracoccus         | 99   | 365  |
| ambiguous_Species_of_Paracoccus       | 3553 | 3814 |
| Paracoccus alcaliphilus               | 50   | 63   |
| Paracoccus alkenifer                  | 0    | 0    |
| Paracoccus aminovorans                | 327  | 1103 |
| Paracoccus halophilus                 | 0    | 0    |
| Paracoccus kocurii                    | 22   | 12   |
| Paracoccus marcusii                   | 0    | 116  |
| Paracoccus solventivorans             | 0    | 0    |
| Paracoccus sp.                        | 95   | 184  |

|                                        |       |      |
|----------------------------------------|-------|------|
| Paracoccus sphaerophysae               | 0     | 95   |
| Paracoccus stylophorae                 | 0     | 41   |
| Paracoccus thiocyanatus                | 0     | 0    |
| Paracoccus tibetensis                  | 106   | 983  |
| ambiguous_Species_of_Pseudorhodobacter | 81    | 0    |
| Pseudorhodobacter sp.                  | 62    | 13   |
| Pseudorhodobacter wandonensis          | 111   | 73   |
| unknown_Species_of_Rhodobacter         | 240   | 0    |
| ambiguous_Species_of_Rhodobacter       | 0     | 0    |
| Rhodobacter aestuarii                  | 61    | 0    |
| Rhodobacter sp.                        | 855   | 73   |
| Rhodobacter veldkampii                 | 12    | 59   |
| unknown_Species_of_Rubellimicrobium    | 0     | 0    |
| ambiguous_Species_of_Rubellimicrobium  | 79    | 10   |
| unknown_Genus_of_Acetobacteraceae      | 71    | 0    |
| ambiguous_Genus_of_Acetobacteraceae    | 0     | 0    |
| unknown_Species_of_Roseomonas          | 0     | 0    |
| ambiguous_Species_of_Roseomonas        | 10    | 0    |
| Roseomonas aerophila                   | 47    | 246  |
| Roseomonas aquatica                    | 0     | 0    |
| unknown_Genus_of_Rhodospirillaceae     | 63    | 95   |
| unknown_Genus_of_Rickettsiaceae        | 0     | 0    |
| unknown_Genus_of_Erythrobacteraceae    | 64    | 130  |
| ambiguous_Genus_of_Erythrobacteraceae  | 57    | 322  |
| unknown_Species_of_Altererythrobacter  | 80    | 273  |
| Altererythrobacter epoxidivorans       | 0     | 47   |
| Altererythrobacter namhicola           | 10    | 0    |
| Altererythrobacter sp.                 | 57    | 53   |
| unknown_Species_of_Erythrobacter       | 38    | 68   |
| ambiguous_Species_of_Erythrobacter     | 0     | 23   |
| Erythrobacter gangjinensis             | 0     | 77   |
| Erythrobacter pelagi                   | 0     | 10   |
| Erythrobacter sp.                      | 0     | 28   |
| unknown_Species_of_Erythromicrobium    | 0     | 20   |
| Erythromicrobium ramosum               | 0     | 0    |
| unknown_Species_of_Porphyrrobacter     | 0     | 28   |
| Porphyrrobacter sanguineus             | 140   | 62   |
| unknown_Genus_of_Sphingomonadaceae     | 236   | 46   |
| ambiguous_Genus_of_Sphingomonadaceae   | 11519 | 6769 |
| Altererythrobacter troitsensis         | 35    | 176  |
| Blastomonas sp.                        | 0     | 0    |
| Lutibacterium sp.                      | 0     | 21   |
| unknown_Species_of_Novosphingobium     | 437   | 67   |
| ambiguous_Species_of_Novosphingobium   | 51    | 24   |
| Novosphingobium lentum                 | 0     | 12   |
| Novosphingobium nitrogenifigens        | 0     | 0    |

|                                     |      |       |
|-------------------------------------|------|-------|
| Novosphingobium rosa                | 0    | 0     |
| Novosphingobium soli                | 384  | 218   |
| Novosphingobium sp.                 | 0    | 13    |
| Novosphingobium tardaugens          | 0    | 0     |
| Sandaracinobacter sibiricus         | 66   | 0     |
| ambiguous_Species_of_Sphingobium    | 64   | 0     |
| Sphingobium faniae                  | 0    | 0     |
| Sphingobium fontiphilum             | 0    | 0     |
| Sphingobium jiangsuense             | 0    | 0     |
| Sphingobium sp.                     | 0    | 0     |
| Sphingobium vulgare                 | 0    | 0     |
| unknown_Species_of_Sphingomonas     | 37   | 108   |
| ambiguous_Species_of_Sphingomonas   | 3896 | 17580 |
| Sphingomonas aerolata               | 318  | 960   |
| Sphingomonas aestuarii              | 13   | 297   |
| Sphingomonas alpina                 | 0    | 0     |
| Sphingomonas asaccharolytica        | 0    | 14    |
| Sphingomonas astaxanthinifaciens    | 33   | 22    |
| Sphingomonas cynarae                | 45   | 518   |
| Sphingomonas faeni                  | 1084 | 1741  |
| Sphingomonas glacialis              | 265  | 724   |
| Sphingomonas hankookensis           | 136  | 169   |
| Sphingomonas koreensis              | 305  | 62    |
| Sphingomonas kwangyangensis         | 0    | 0     |
| Sphingomonas molluscorum            | 0    | 14    |
| Sphingomonas mucosissima            | 0    | 0     |
| Sphingomonas pseudosanguinis        | 10   | 53    |
| Sphingomonas sp.                    | 462  | 1104  |
| unknown_Species_of_Sphingopyxis     | 0    | 0     |
| ambiguous_Species_of_Sphingopyxis   | 0    | 0     |
| Sphingopyxis bauzanensis            | 0    | 12    |
| unknown_Species_of_Sphingosinicella | 0    | 0     |
| unknown_Genus_of_Alcaligenaceae     | 1846 | 148   |
| unknown_Species_of_Achromobacter    | 40   | 22    |
| ambiguous_Species_of_Achromobacter  | 20   | 23    |
| unknown_Species_of_Derxia           | 0    | 0     |
| unknown_Species_of_Oligella         | 375  | 64    |
| Oligella ureolytica                 | 39   | 83    |
| unknown_Species_of_Paenicaligenes   | 304  | 137   |
| unknown_Species_of_Pelistega        | 276  | 207   |
| Pusillimonas noertemannii           | 0    | 10    |
| ambiguous_Genus_of_Burkholderiaceae | 133  | 0     |
| unknown_Species_of_Burkholderia     | 0    | 13    |
| ambiguous_Genus_of_Comamonadaceae   | 1140 | 847   |
| unknown_Species_of_Acidovorax       | 24   | 23    |
| ambiguous_Species_of_Acidovorax     | 0    | 0     |

|                                                |      |      |
|------------------------------------------------|------|------|
| Acidovorax defluvi                             | 11   | 0    |
| Acidovorax facilis                             | 0    | 34   |
| Acidovorax soli                                | 0    | 0    |
| Acidovorax sp.                                 | 95   | 261  |
| unknown_Species_of_Comamonas                   | 997  | 88   |
| ambiguous_Species_of_Comamonas                 | 413  | 232  |
| Comamonas aquatica                             | 348  | 105  |
| Comamonas jiangduensis                         | 84   | 0    |
| Comamonas kerstersii                           | 723  | 0    |
| Diaphorobacter oryzae                          | 69   | 0    |
| Limnohabitans parvus                           | 0    | 44   |
| ambiguous_Species_of_Pseudorhodoferax          | 11   | 39   |
| Pseudorhodoferax soli                          | 0    | 0    |
| unknown_Species_of_Rhodoferax                  | 0    | 0    |
| Rhodoferax ferrireducens                       | 0    | 0    |
| unknown_Species_of_Rubrivivax                  | 0    | 0    |
| Rubrivivax gelatinosus                         | 0    | 0    |
| ambiguous_Species_of_Variovorax                | 20   | 63   |
| Xenophilus aerolatus                           | 0    | 30   |
| unknown_Genus_of_Oxalobacteraceae              | 26   | 10   |
| ambiguous_Genus_of_Oxalobacteraceae            | 119  | 868  |
| Janthinobacterium sp.                          | 0    | 11   |
| ambiguous_Species_of_Massilia                  | 555  | 4210 |
| Massilia aerilata                              | 0    | 20   |
| Massilia aurea                                 | 1300 | 1214 |
| Massilia brevitalea                            | 0    | 0    |
| Massilia namucuoensis                          | 0    | 1188 |
| Massilia sp.                                   | 567  | 375  |
| ambiguous_Genus_of_unclassifiedBurkholderiales | 10   | 0    |
| Aquabacterium commune                          | 0    | 0    |
| Piscinibacter aquaticus                        | 0    | 0    |
| unknown_Genus_of_Neisseriaceae                 | 165  | 0    |
| Neisseria flavescens                           | 52   | 0    |
| unknown_Genus_of_Rhodocyclaceae                | 0    | 25   |
| unknown_Genus_of_Bacteriovoracaceae            | 59   | 0    |
| Peredibacter starrii                           | 0    | 0    |
| unknown_Genus_of_Bdellovibrionaceae            | 0    | 16   |
| unknown_Species_of_Bdellovibrio                | 0    | 0    |
| Bdellovibrio bacteriovorus                     | 0    | 29   |
| unknown_Genus_of_Desulfobulbaceae              | 0    | 12   |
| unknown_Genus_of_Polyangiaceae                 | 10   | 0    |
| unknown_Species_of_Campylobacter               | 59   | 0    |
| unknown_Genus_of_Alteromonadaceae              | 136  | 61   |
| unknown_Species_of_Marinimicrobium             | 40   | 104  |
| ambiguous_Species_of_Marinobacter              | 16   | 64   |
| Teredinibacter turnerae                        | 0    | 0    |

|                                       |       |       |
|---------------------------------------|-------|-------|
| unknown_Species_of_Idiomarina         | 0     | 0     |
| ambiguous_Species_of_Idiomarina       | 169   | 245   |
| Idiomarina indica                     | 0     | 0     |
| unknown_Species_of_Shewanella         | 0     | 24    |
| unknown_Genus_of_Chromatiaceae        | 22    | 0     |
| ambiguous_Genus_of_Chromatiaceae      | 0     | 0     |
| ambiguous_Species_of_Rheinheimera     | 0     | 0     |
| unknown_Genus_of_Enterobacteriaceae   | 0     | 0     |
| ambiguous_Genus_of_Enterobacteriaceae | 3788  | 6600  |
| ambiguous_Species_of_Pantoea          | 3034  | 3455  |
| Pantoea agglomerans                   | 1271  | 1164  |
| ambiguous_Species_of_Legionella       | 49    | 0     |
| Legionella fallonii                   | 0     | 0     |
| unknown_Genus_of_Methylococcaceae     | 0     | 0     |
| ambiguous_Genus_of_Methylococcaceae   | 0     | 0     |
| unknown_Species_of_Methylococcus      | 0     | 0     |
| unknown_Species_of_Alcanivorax        | 0     | 0     |
| unknown_Species_of_Hahella            | 0     | 0     |
| Zooshikella ganghwensis               | 0     | 0     |
| Halomonas sp.                         | 10    | 11    |
| unknown_Genus_of_Oceanospirillaceae   | 56    | 33    |
| ambiguous_Genus_of_Oceanospirillaceae | 59    | 30    |
| unknown_Genus_of_Saccharospirillaceae | 0     | 0     |
| ambiguous_Genus_of_Pasteurellaceae    | 0     | 0     |
| Avibacterium sp.                      | 0     | 0     |
| unknown_Genus_of_Moraxellaceae        | 271   | 151   |
| ambiguous_Genus_of_Moraxellaceae      | 2613  | 11895 |
| unknown_Species_of_Acinetobacter      | 2101  | 441   |
| ambiguous_Species_of_Acinetobacter    | 17139 | 11869 |
| Acinetobacter calcoaceticus           | 174   | 82    |
| Acinetobacter johnsonii               | 151   | 89    |
| Acinetobacter junii                   | 190   | 33    |
| Acinetobacter lwoffii                 | 4002  | 2161  |
| Acinetobacter sp.                     | 1683  | 1148  |
| Acinetobacter ursingii                | 71    | 94    |
| ambiguous_Species_of_Psychrobacter    | 36    | 0     |
| unknown_Genus_of_Pseudomonadaceae     | 906   | 96    |
| ambiguous_Genus_of_Pseudomonadaceae   | 413   | 367   |
| unknown_Species_of_Cellvibrio         | 59    | 10    |
| ambiguous_Species_of_Cellvibrio       | 311   | 137   |
| Cellvibrio fibrivorans                | 54    | 0     |
| Cellvibrio fulvus                     | 0     | 0     |
| Cellvibrio gandavensis                | 509   | 261   |
| Cellvibrio mixtus                     | 0     | 0     |
| Cellvibrio ostraviensis               | 22    | 0     |
| Cellvibrio sp.                        | 415   | 231   |

|                                        |      |      |
|----------------------------------------|------|------|
| unknown_Species_of_Pseudomonas         | 625  | 65   |
| ambiguous_Species_of_Pseudomonas       | 4818 | 9980 |
| Pseudomonas argentinensis              | 19   | 0    |
| Pseudomonas formosensis                | 200  | 412  |
| Pseudomonas pertucinogena              | 43   | 0    |
| Pseudomonas rhizosphaerae              | 0    | 0    |
| Pseudomonas sp.                        | 590  | 967  |
| Pseudomonas vranovensis                | 84   | 114  |
| Rhizobacter fulvus                     | 26   | 13   |
| unknown_Genus_of_Piscirickettsiaceae   | 15   | 0    |
| unknown_Species_of_Methylophaga        | 71   | 11   |
| unknown_Species_of_Thiomicrospira      | 0    | 38   |
| ambiguous_Genus_of_Sinobacteraceae     | 0    | 0    |
| unknown_Species_of_Steroidobacter      | 13   | 0    |
| unknown_Genus_of_Xanthomonadaceae      | 281  | 14   |
| ambiguous_Genus_of_Xanthomonadaceae    | 435  | 4361 |
| unknown_Species_of_Luteimonas          | 202  | 86   |
| ambiguous_Species_of_Luteimonas        | 24   | 476  |
| Luteimonas composti                    | 0    | 60   |
| Luteimonas mephitis                    | 0    | 0    |
| Luteimonas sp.                         | 37   | 56   |
| Luteimonas terricola                   | 0    | 15   |
| Luteimonas vadosa                      | 0    | 0    |
| unknown_Species_of_Lysobacter          | 116  | 61   |
| ambiguous_Species_of_Lysobacter        | 68   | 64   |
| Lysobacter antibioticus                | 0    | 0    |
| Lysobacter arseniciresistens           | 0    | 0    |
| Lysobacter bugurensis                  | 0    | 0    |
| Lysobacter sp.                         | 0    | 15   |
| unknown_Species_of_Pseudoxanthomonas   | 46   | 0    |
| ambiguous_Species_of_Pseudoxanthomonas | 0    | 0    |
| Pseudoxanthomonas sp.                  | 0    | 0    |
| Pseudoxanthomonas suwonensis           | 26   | 0    |
| unknown_Species_of_Stenotrophomonas    | 363  | 93   |
| ambiguous_Species_of_Stenotrophomonas  | 10   | 629  |
| Stenotrophomonas chelatiphaga          | 0    | 657  |
| Stenotrophomonas ginsengisoli          | 274  | 0    |
| Stenotrophomonas humi                  | 177  | 0    |
| Stenotrophomonas koreensis             | 441  | 185  |
| Stenotrophomonas rhizophila            | 84   | 2999 |
| Stenotrophomonas sp.                   | 148  | 33   |
| unknown_Species_of_Thermomonas         | 96   | 684  |
| ambiguous_Species_of_Thermomonas       | 0    | 0    |
| Thermomonas brevis                     | 93   | 1118 |
| Thermomonas fusca                      | 11   | 0    |
| Thermomonas koreensis                  | 39   | 1377 |

|                                                  |     |     |
|--------------------------------------------------|-----|-----|
| Xanthomonas sp.                                  | 0   | 0   |
| unknown_Genus_of_unclassifiedGammaproteobacteria | 20  | 0   |
| unknown_Genus_of_Brachyspiraceae                 | 58  | 135 |
| unknown_Genus_of_Spirochaetaceae                 | 21  | 0   |
| unknown_Genus_of_Acholeplasmataceae              | 18  | 11  |
| unknown_Species_of_CandidatusPhytoplasma         | 0   | 0   |
| CandidatusPhytoplasma sp.                        | 0   | 0   |
| unknown_Genus_of_Mycoplasmataceae                | 26  | 0   |
| unknown_Genus_of_Puniceicoccaceae                | 0   | 0   |
| unknown_Genus_of_Verrucomicrobiaceae             | 0   | 110 |
| unknown_Genus_of_Solibacteraceae                 | 194 | 0   |
| Serinibacter salmoneus                           | 98  | 0   |
| unknown_Species_of_Brevibacterium                | 149 | 0   |
| Brevibacterium antiquum                          | 46  | 0   |
| Brevibacterium aurantiacum                       | 92  | 0   |
| Brevibacterium senegalense                       | 72  | 0   |
| Brevibacterium sp.                               | 0   | 0   |
| Brevibacterium yomogidense                       | 39  | 0   |
| unknown_Genus_of_Cellulomonadaceae               | 33  | 0   |
| Cellulomonas sp.                                 | 0   | 0   |
| unknown_Genus_of_Corynebacteriaceae              | 44  | 0   |
| Corynebacterium ammoniagenes                     | 35  | 0   |
| Corynebacterium efficiens                        | 0   | 0   |
| Corynebacterium glucuronolyticum                 | 10  | 0   |
| Corynebacterium humireducens                     | 38  | 0   |
| Corynebacterium sp.                              | 0   | 0   |
| Corynebacterium tuscaniense                      | 0   | 0   |
| Corynebacterium urealyticum                      | 17  | 0   |
| Corynebacterium variabile                        | 79  | 0   |
| unknown_Genus_of_Demequinaceae                   | 0   | 0   |
| Demequina aurantiaca                             | 0   | 0   |
| Demetria terrigena                               | 0   | 0   |
| unknown_Species_of_Dietzia                       | 0   | 0   |
| Dietzia aerolata                                 | 0   | 0   |
| ambiguous_Genus_of_Frankiaceae                   | 43  | 0   |
| unknown_Species_of_Geodermatophilus              | 0   | 0   |
| unknown_Genus_of_Gordoniaceae                    | 0   | 0   |
| ambiguous_Genus_of_Gordoniaceae                  | 0   | 0   |
| unknown_Species_of_Gordonia                      | 0   | 0   |
| ambiguous_Species_of_Gordonia                    | 0   | 0   |
| Gordonia humi                                    | 0   | 0   |
| Gordonia paraffinivorans                         | 0   | 0   |
| Gordonia shandongensis                           | 0   | 0   |
| ambiguous_Species_of_Janibacter                  | 0   | 0   |
| Knoellia locipacati                              | 104 | 0   |
| unknown_Species_of_Jonesia                       | 15  | 0   |

|                                        |     |    |
|----------------------------------------|-----|----|
| Jonesia denitrificans                  | 0   | 0  |
| unknown_Genus_of_Kineosporiaceae       | 25  | 0  |
| ambiguous_Species_of_Angustibacter     | 0   | 0  |
| unknown_Genus_of_Microbacteriaceae     | 49  | 0  |
| Agrococcus carbonis                    | 10  | 0  |
| Agromyces cerinus                      | 0   | 0  |
| Curtobacterium herbarum                | 12  | 0  |
| Curtobacterium luteum                  | 0   | 0  |
| Herbiconiux moechotypicola             | 0   | 0  |
| Microbacterium amylolyticum            | 63  | 0  |
| Microbacterium arabinogalactanolyticum | 0   | 0  |
| Microbacterium flavum                  | 0   | 32 |
| Microbacterium gubbeenense             | 27  | 0  |
| Microbacterium indicum                 | 0   | 0  |
| Microbacterium saperdae                | 10  | 0  |
| Plantibacter flavus                    | 0   | 0  |
| Rathayibacter caricis                  | 11  | 0  |
| Rathayibacter tritici                  | 48  | 0  |
| Arthrobacter arilaitensis              | 207 | 0  |
| Arthrobacter mysorens                  | 0   | 11 |
| Arthrobacter protophormiae             | 24  | 0  |
| unknown_Species_of_Micrococcus         | 0   | 0  |
| Nesterenkonia aethiopica               | 0   | 0  |
| unknown_Species_of_Yaniella            | 207 | 0  |
| Yaniella soli                          | 65  | 0  |
| unknown_Species_of_Nakamurella         | 33  | 0  |
| unknown_Species_of_Aeromicrobium       | 0   | 0  |
| Aeromicrobium sp.                      | 0   | 0  |
| Marmoricola korecus                    | 0   | 0  |
| Nocardioides iriomotensis              | 0   | 0  |
| Nocardioides jensenii                  | 0   | 0  |
| Nocardioides lianchengensis            | 0   | 0  |
| Nocardioides plantarum                 | 34  | 0  |
| Nocardioides sp.                       | 325 | 0  |
| ambiguous_Genus_of_Nocardiopsaceae     | 0   | 0  |
| unknown_Species_of_Murinocardiopsis    | 0   | 0  |
| Nocardiopsis composta                  | 0   | 0  |
| Nocardiopsis sp.                       | 141 | 0  |
| ambiguous_Species_of_Thermobifida      | 0   | 0  |
| Thermobifida alba                      | 0   | 0  |
| ambiguous_Species_of_Promicromonospora | 65  | 0  |
| Promicromonospora endophytica          | 0   | 0  |
| Promicromonospora thailandica          | 0   | 0  |
| unknown_Species_of_Brooklawnia         | 0   | 0  |
| ambiguous_Genus_of_Pseudonocardiaceae  | 371 | 0  |
| unknown_Species_of_Actinomycetospora   | 11  | 0  |



|                                       |     |      |
|---------------------------------------|-----|------|
| unknown_Species_of_Pseudonocardia     | 38  | 0    |
| Pseudonocardia ammonioxydans          | 0   | 0    |
| Saccharomonospora viridis             | 0   | 0    |
| Saccharopolyspora dendranthemae       | 0   | 0    |
| Saccharopolyspora flava               | 0   | 10   |
| Saccharopolyspora gloriosa            | 483 | 63   |
| Sanguibacter soli                     | 0   | 0    |
| ambiguous_Species_of_Streptomyces     | 209 | 0    |
| Streptomyces alanosinicus             | 0   | 0    |
| Streptomyces sp.                      | 164 | 0    |
| unknown_Genus_of_Bifidobacteriaceae   | 0   | 0    |
| Patulibacter minatonensis             | 0   | 0    |
| unknown_Genus_of_Bacteroidaceae       | 392 | 0    |
| unknown_Species_of_Bacteroides        | 0   | 0    |
| Bacteroides graminisolvens            | 0   | 0    |
| unknown_Species_of_Porphyromonas      | 0   | 0    |
| Porphyromonas bennonis                | 0   | 0    |
| unknown_Species_of_Proteiniphilum     | 0   | 0    |
| unknown_Genus_of_Prevotellaceae       | 546 | 0    |
| Alloprevotella rava                   | 0   | 0    |
| Prevotella buccalis                   | 0   | 0    |
| Prevotella sp.                        | 0   | 0    |
| Prevotella timonensis                 | 0   | 0    |
| unknown_Species_of_Hymenobacter       | 83  | 554  |
| Hymenobacter sp.                      | 96  | 68   |
| unknown_Genus_of_Cryomorphaceae       | 345 | 0    |
| Chryseobacterium hagamense            | 0   | 0    |
| Chryseobacterium piscicola            | 0   | 72   |
| ambiguous_Species_of_Empedobacter     | 67  | 100  |
| Flavobacterium cauense                | 10  | 0    |
| Flavobacterium rivuli                 | 0   | 12   |
| Myroides marinus                      | 45  | 0    |
| Myroides odoratus                     | 0   | 0    |
| unknown_Species_of_Wautersiella       | 71  | 0    |
| unknown_Species_of_Mucilaginibacter   | 0   | 36   |
| Pedobacter aquatilis                  | 0   | 0    |
| Pedobacter daejeonensis               | 0   | 0    |
| Pedobacter ginsengisoli               | 0   | 0    |
| Pedobacter panaciterrae               | 0   | 29   |
| ambiguous_Species_of_Sphingobacterium | 38  | 27   |
| Sphingobacterium composti             | 11  | 0    |
| Sphingobacterium shayense             | 0   | 0    |
| Sphingobacterium thermophilum         | 10  | 0    |
| unknown_Genus_of_Criblamydiaceae      | 0   | 0    |
| ambiguous_Genus_of_Nostocaceae        | 0   | 0    |
| unknown_Genus_of_Phormidiaceae        | 137 | 1284 |

|                                      |     |     |
|--------------------------------------|-----|-----|
| unknown_Genus_of_Deinococcaceae      | 31  | 10  |
| Fibrobacter succinogenes             | 76  | 0   |
| unknown_Genus_of_Alicyclobacillaceae | 0   | 0   |
| unknown_Species_of_Amphibacillus     | 173 | 0   |
| Bacillus anthracis                   | 149 | 0   |
| Bacillus cecembensis                 | 179 | 13  |
| Bacillus composti                    | 0   | 0   |
| Bacillus eiseniae                    | 33  | 71  |
| Bacillus gibsonii                    | 0   | 0   |
| Bacillus longiquaesitum              | 0   | 0   |
| Gracilibacillus halotolerans         | 127 | 0   |
| unknown_Species_of_Lysinibacillus    | 129 | 22  |
| ambiguous_Species_of_Lysinibacillus  | 352 | 193 |
| Lysinibacillus odysseyi              | 0   | 0   |
| Lysinibacillus sinduriensis          | 271 | 10  |
| Oceanobacillus chironomi             | 67  | 0   |
| Oceanobacillus indicireducens        | 20  | 0   |
| Oceanobacillus profundus             | 149 | 0   |
| unknown_Species_of_Virgibacillus     | 736 | 0   |
| unknown_Species_of_Gemella           | 0   | 0   |
| ambiguous_Species_of_Gemella         | 0   | 0   |
| unknown_Species_of_Paenibacillus     | 517 | 50  |
| Paenibacillus hordei                 | 148 | 86  |
| Paenibacillus sp.                    | 246 | 120 |
| unknown_Species_of_Caryophanon       | 224 | 18  |
| ambiguous_Species_of_Caryophanon     | 16  | 58  |
| unknown_Species_of_Kurthia           | 320 | 0   |
| Kurthia gibsonii                     | 55  | 0   |
| Kurthia sibirica                     | 174 | 0   |
| Lysinibacillus boronitolerans        | 0   | 0   |
| ambiguous_Species_of_Planococcus     | 0   | 0   |
| Planococcus donghaensis              | 39  | 0   |
| Planococcus psychrotoleratus         | 0   | 0   |
| Planococcus salinarum                | 70  | 0   |
| Planococcus sp.                      | 0   | 0   |
| Planomicrobium glaciei               | 35  | 0   |
| Planomicrobium stackebrandtii        | 0   | 0   |
| Solibacillus silvestris              | 102 | 35  |
| Viridibacillus arvi                  | 141 | 15  |
| unknown_Genus_of_Staphylococcaceae   | 0   | 0   |
| unknown_Species_of_Jeotgalicoccus    | 203 | 0   |
| Jeotgalicoccus pinnipedialis         | 30  | 0   |
| ambiguous_Species_of_Macroccoccus    | 43  | 0   |
| Macroccoccus caseolyticus            | 0   | 0   |
| Salinicoccus alkaliphilus            | 0   | 0   |
| Salinicoccus kunmingensis            | 0   | 0   |

|                                                      |      |    |
|------------------------------------------------------|------|----|
| unknown_Species_of_Staphylococcus                    | 0    | 0  |
| Staphylococcus arlettae                              | 157  | 0  |
| Staphylococcus cohnii                                | 0    | 0  |
| Staphylococcus lentus                                | 18   | 0  |
| unknown_Genus_of_Thermoactinomycetaceae              | 52   | 0  |
| Facklamia hominis                                    | 0    | 10 |
| unknown_Species_of_Globicatella                      | 26   | 0  |
| Globicatella sanguinis                               | 0    | 0  |
| Globicatella sulfidifaciens                          | 96   | 75 |
| ambiguous_Genus_of_Carnobacteriaceae                 | 283  | 0  |
| Atopostipes suicloacalis                             | 329  | 0  |
| ambiguous_Species_of_Carnobacterium                  | 485  | 0  |
| unknown_Species_of_Granulicatella                    | 0    | 0  |
| ambiguous_Species_of_Granulicatella                  | 0    | 0  |
| Granulicatella elegans                               | 0    | 0  |
| unknown_Genus_of_Enterococcaceae                     | 0    | 0  |
| ambiguous_Genus_of_Enterococcaceae                   | 80   | 0  |
| ambiguous_Species_of_Enterococcus                    | 39   | 0  |
| unknown_Genus_of_Lactobacillaceae                    | 112  | 10 |
| Lactobacillus equi                                   | 0    | 0  |
| ambiguous_Species_of_Weissella                       | 176  | 11 |
| unknown_Species_of_Streptococcus                     | 0    | 0  |
| Streptococcus parauberis                             | 0    | 0  |
| Streptococcus salivarius                             | 131  | 0  |
| Streptococcus sp.                                    | 0    | 0  |
| Clostridium hathewayi                                | 352  | 0  |
| Proteiniclasticum ruminis                            | 0    | 0  |
| unknown_Genus_of_ClostridialesFamilyXI.IncertaeSedis | 276  | 0  |
| ambiguous_Species_of_Anaerococcus                    | 0    | 0  |
| Anaerococcus hydrogenalis                            | 0    | 0  |
| Anaerococcus octavius                                | 258  | 0  |
| Finegoldia magna                                     | 48   | 0  |
| Peptoniphilus coxii                                  | 0    | 0  |
| Peptoniphilus harei                                  | 0    | 0  |
| unknown_Species_of_Tissierella                       | 16   | 0  |
| Tissierella creatinini                               | 10   | 0  |
| unknown_Genus_of_Lachnospiraceae                     | 1135 | 0  |
| ambiguous_Genus_of_Lachnospiraceae                   | 2021 | 17 |
| ambiguous_Species_of_Blautia                         | 38   | 0  |
| unknown_Species_of_Coproccoccus                      | 228  | 0  |
| Coproccoccus eutactus                                | 185  | 0  |
| unknown_Genus_of_Peptoniphilaceae                    | 119  | 0  |
| ambiguous_Genus_of_Peptoniphilaceae                  | 12   | 0  |
| unknown_Species_of_Anaerococcus                      | 44   | 0  |
| unknown_Species_of_Finegoldia                        | 27   | 0  |
| unknown_Species_of_Helcococcus                       | 11   | 0  |

|                                            |     |     |
|--------------------------------------------|-----|-----|
| unknown_Species_of_Peptoclostridium        | 0   | 0   |
| unknown_Species_of_Ruminococcus            | 16  | 0   |
| Ruminococcus gauvreauii                    | 141 | 0   |
| unknown_Genus_of_unclassifiedClostridiales | 101 | 0   |
| unknown_Genus_of_Erysipelotrichaceae       | 135 | 0   |
| unknown_Genus_of_Veillonellaceae           | 32  | 0   |
| unknown_Genus_of_Nitrospiraceae            | 14  | 0   |
| unknown_Genus_of_Magnetococcaceae          | 44  | 0   |
| unknown_Genus_of_Aurantimonadaceae         | 0   | 10  |
| ambiguous_Genus_of_Bartonellaceae          | 12  | 10  |
| Cucumibacter marinus                       | 0   | 0   |
| unknown_Species_of_Pelagibacterium         | 0   | 13  |
| ambiguous_Species_of_Chelativorans         | 0   | 0   |
| Nitratireductor lucknowense                | 0   | 0   |
| Thermovum composti                         | 0   | 0   |
| Rhizobium radiobacter                      | 0   | 107 |
| Rhizobium tibeticum                        | 0   | 12  |
| Shinella daejeonensis                      | 0   | 0   |
| unknown_Genus_of_Xanthobacteraceae         | 21  | 0   |
| ambiguous_Species_of_Xanthobacter          | 28  | 0   |
| ambiguous_Genus_of_unclassifiedRhizobiales | 11  | 0   |
| Vasilyevaea mishustinii                    | 0   | 0   |
| Rhodobacter capsulatus                     | 0   | 0   |
| Rhodobacter sphaeroides                    | 0   | 0   |
| unknown_Species_of_Roseivivax              | 0   | 0   |
| Thioclava sp.                              | 0   | 0   |
| unknown_Species_of_Tranquillimonas         | 0   | 0   |
| Yangia pacifica                            | 72  | 0   |
| Novosphingobium barchaimii                 | 0   | 63  |
| Sphingomonas echinoides                    | 33  | 0   |
| Sphingomonas insulae                       | 0   | 98  |
| Sphingomonas melonis                       | 39  | 48  |
| Sphingomonas panni                         | 0   | 41  |
| Sphingomonas yunnanensis                   | 0   | 0   |
| ambiguous_Genus_of_Alcaligenaceae          | 27  | 91  |
| Advenella incenata                         | 0   | 0   |
| Alcaligenes faecalis                       | 0   | 0   |
| Bordetella petrii                          | 0   | 0   |
| Paenalcaligenes hominis                    | 42  | 144 |
| unknown_Species_of_Pigmentiphaga           | 0   | 12  |
| ambiguous_Species_of_Pigmentiphaga         | 0   | 13  |
| unknown_Species_of_Pusillimonas            | 25  | 0   |
| unknown_Genus_of_Burkholderiaceae          | 0   | 0   |
| Burkholderia sp.                           | 0   | 0   |
| Comamonas sp.                              | 262 | 0   |
| Hydrogenophaga bisanensis                  | 0   | 0   |

|                                         |     |     |
|-----------------------------------------|-----|-----|
| Hydrogenophaga sp.                      | 0   | 0   |
| Malikia spinosa                         | 0   | 0   |
| Pelomonas aquatica                      | 0   | 0   |
| Pelomonas puraquae                      | 10  | 0   |
| unknown_Species_of_Pseudacidovorax      | 0   | 110 |
| Ramlibacter henchirensis                | 13  | 117 |
| Variovorax boronicumulans               | 0   | 0   |
| Variovorax paradoxus                    | 98  | 36  |
| ambiguous_Species_of_Duganella          | 0   | 322 |
| Duganella phyllosphaerae                | 0   | 76  |
| Duganella zoogloeoides                  | 0   | 253 |
| unknown_Species_of_Janthinobacterium    | 0   | 41  |
| ambiguous_Species_of_Janthinobacterium  | 41  | 30  |
| Janthinobacterium lividum               | 59  | 0   |
| unknown_Species_of_Massilia             | 0   | 196 |
| Massilia niabensis                      | 0   | 123 |
| Massilia timonae                        | 0   | 180 |
| Tepidiphilus thermophilus               | 0   | 0   |
| unknown_Species_of_Neisseria            | 0   | 0   |
| ambiguous_Species_of_Neisseria          | 0   | 0   |
| unknown_Species_of_Azoarcus             | 0   | 0   |
| Denitratisoma sp.                       | 0   | 0   |
| Petrobacter succinatimandens            | 0   | 0   |
| unknown_Genus_of_Desulfobacteraceae     | 0   | 0   |
| unknown_Genus_of_Desulfovibrionaceae    | 369 | 0   |
| unknown_Genus_of_Geobacteraceae         | 73  | 0   |
| unknown_Genus_of_Pelobacteraceae        | 23  | 0   |
| unknown_Genus_of_Syntrophaceae          | 0   | 17  |
| unknown_Genus_of_Syntrophobacteraceae   | 0   | 0   |
| ambiguous_Species_of_Arcobacter         | 0   | 0   |
| Arcobacter butzleri                     | 0   | 0   |
| Arcobacter cryaerophilus                | 25  | 0   |
| Arcobacter skirrowii                    | 0   | 0   |
| Campylobacter ureolyticus               | 0   | 0   |
| unknown_Genus_of_Helicobacteraceae      | 11  | 0   |
| unknown_Genus_of_Aeromonadaceae         | 14  | 0   |
| ambiguous_Species_of_Aeromonas          | 0   | 0   |
| ambiguous_Species_of_Alishewanella      | 0   | 0   |
| Alishewanella sp.                       | 0   | 0   |
| Marinimicrobium sp.                     | 0   | 0   |
| unknown_Species_of_Microbulbifer        | 236 | 35  |
| unknown_Species_of_Teredinibacter       | 0   | 12  |
| unknown_Genus_of_Idiomarinaceae         | 41  | 0   |
| unknown_Genus_of_Ectothiorhodospiraceae | 0   | 0   |
| ambiguous_Species_of_Halothiobacillus   | 0   | 0   |
| Citrobacter murlinae                    | 0   | 0   |

|                                     |     |     |
|-------------------------------------|-----|-----|
| Enterobacter sp.                    | 0   | 0   |
| unknown_Species_of_Erwinia          | 26  | 0   |
| ambiguous_Species_of_Erwinia        | 270 | 16  |
| Erwinia billingiae                  | 0   | 0   |
| Erwinia persicina                   | 57  | 0   |
| Erwinia rhapontici                  | 188 | 0   |
| Leclercia adecarboxylata            | 0   | 0   |
| unknown_Species_of_Pantoea          | 0   | 0   |
| Pantoea brenneri                    | 202 | 50  |
| Pantoea sp.                         | 42  | 0   |
| ambiguous_Species_of_Serratia       | 77  | 27  |
| Serratia rubidaea                   | 0   | 0   |
| ambiguous_Genus_of_Legionellaceae   | 0   | 0   |
| unknown_Species_of_Legionella       | 0   | 0   |
| unknown_Genus_of_Methylothermaceae  | 69  | 13  |
| unknown_Genus_of_Alcanivoracaceae   | 36  | 0   |
| unknown_Genus_of_Hahellaceae        | 63  | 0   |
| unknown_Genus_of_Halomonadaceae     | 0   | 0   |
| Halomonas anticariensis             | 0   | 0   |
| unknown_Species_of_Thalassolituus   | 0   | 0   |
| Thalassolituus marinus              | 0   | 0   |
| unknown_Genus_of_Orbaceae           | 38  | 0   |
| unknown_Genus_of_Pasteurellaceae    | 0   | 0   |
| unknown_Species_of_Actinobacillus   | 0   | 0   |
| ambiguous_Species_of_Actinobacillus | 0   | 0   |
| Actinobacillus equuli               | 0   | 0   |
| Actinobacillus indolicus            | 0   | 0   |
| Acinetobacter baumannii             | 229 | 0   |
| Acinetobacter beijerinckii          | 13  | 0   |
| Acinetobacter haemolyticus          | 0   | 0   |
| Acinetobacter schindleri            | 182 | 106 |
| Acinetobacter towneri               | 48  | 658 |
| Alkanindiges illinoisensis          | 87  | 11  |
| unknown_Species_of_Moraxella        | 0   | 0   |
| ambiguous_Species_of_Moraxella      | 0   | 0   |
| Moraxella equi                      | 0   | 0   |
| Moraxella sp.                       | 0   | 0   |
| Azomonas agilis                     | 79  | 0   |
| Cellvibrio japonicus                | 0   | 0   |
| Pseudomonas agarici                 | 0   | 0   |
| Pseudomonas bauzanensis             | 47  | 0   |
| Pseudomonas caricapapayae           | 58  | 146 |
| Pseudomonas chlororaphis            | 11  | 15  |
| Pseudomonas cichorii                | 0   | 11  |
| Pseudomonas cremoricolorata         | 44  | 0   |
| Pseudomonas fuscovaginae            | 0   | 0   |

|                                          |     |     |
|------------------------------------------|-----|-----|
| <i>Pseudomonas graminis</i>              | 98  | 11  |
| <i>Pseudomonas libanensis</i>            | 31  | 13  |
| <i>Pseudomonas lutea</i>                 | 127 | 0   |
| <i>Pseudomonas orientalis</i>            | 0   | 0   |
| <i>Pseudomonas punonensis</i>            | 0   | 543 |
| <i>Pseudomonas savastanoi</i>            | 13  | 196 |
| <i>Pseudomonas stutzeri</i>              | 0   | 0   |
| <i>Pseudomonas viridiflava</i>           | 77  | 0   |
| <i>Pseudomonas xiamenensis</i>           | 0   | 0   |
| <i>Methylophaga lonarensis</i>           | 0   | 0   |
| unknown_Genus_of_Thiotrichaceae          | 13  | 0   |
| unknown_Species_of_Achromatium           | 0   | 0   |
| unknown_Species_of_Pseudoalteromonas     | 0   | 0   |
| ambiguous_Genus_of_Vibrionaceae          | 10  | 0   |
| unknown_Species_of_Dokdonella            | 10  | 0   |
| <i>Pseudoxanthomonas taiwanensis</i>     | 0   | 0   |
| <i>Sphaerochaeta globosa</i>             | 0   | 0   |
| <i>Acholeplasma pleciae</i>              | 0   | 0   |
| <i>Corynebacterium callunae</i>          | 18  | 0   |
| <i>Corynebacterium terpenotabidum</i>    | 29  | 0   |
| <i>Brachybacterium muris</i>             | 20  | 0   |
| unknown_Species_of_Leucobacter           | 0   | 0   |
| <i>Leucobacter exalbidus</i>             | 17  | 0   |
| <i>Micrococcus lylae</i>                 | 59  | 0   |
| <i>Nesterenkonia lacusekhoensis</i>      | 25  | 0   |
| unknown_Species_of_Zhihengliuella        | 0   | 0   |
| <i>Aeromicrobium tamlense</i>            | 0   | 0   |
| <i>Nocardioides dokdonensis</i>          | 0   | 0   |
| <i>Nocardioides dubius</i>               | 44  | 0   |
| <i>Nocardioides exalbidus</i>            | 62  | 0   |
| <i>Lysinibacillus sphaericus</i>         | 0   | 0   |
| unknown_Species_of_Sporosarcina          | 150 | 0   |
| <i>Staphylococcus gallinarum</i>         | 0   | 0   |
| <i>Atopococcus tabaci</i>                | 15  | 0   |
| <i>Enterococcus malodoratus</i>          | 21  | 0   |
| ambiguous_Genus_of_Eubacteriaceae        | 158 | 0   |
| <i>Eubacterium hallii</i>                | 40  | 0   |
| ambiguous_Genus_of_Peptostreptococcaceae | 41  | 0   |
| ambiguous_Species_of_Citreicella         | 0   | 0   |
| <i>Natronohydrobacter thiooxidans</i>    | 0   | 0   |
| unknown_Species_of_Paenirhodobacter      | 0   | 0   |
| unknown_Species_of_Pseudorhodobacter     | 0   | 0   |
| unknown_Species_of_Roseibaca             | 0   | 0   |
| unknown_Species_of_Tabrizicola           | 17  | 0   |
| <i>Sphingopyxis italica</i>              | 0   | 0   |
| unknown_Species_of_Bordetella            | 0   | 0   |

|                                           |      |    |
|-------------------------------------------|------|----|
| unknown_Species_of_Castellaniella         | 0    | 0  |
| Curvibacter delicatus                     | 0    | 0  |
| unknown_Genus_of_Acidithiobacillaceae     | 0    | 0  |
| Zobellella taiwanensis                    | 136  | 28 |
| ambiguous_Genus_of_Alteromonadaceae       | 0    | 0  |
| ambiguous_Species_of_Marinimicrobium      | 0    | 0  |
| Aliidiomarina taiwanensis                 | 38   | 0  |
| ambiguous_Genus_of_Shewanellaceae         | 0    | 0  |
| ambiguous_Genus_of_Ectothiorhodospiraceae | 0    | 0  |
| Erwinia aphidicola                        | 0    | 0  |
| ambiguous_Genus_of_Halomonadaceae         | 0    | 0  |
| Pseudomonas seleniipraecipitans           | 0    | 0  |
| unknown_Species_of_Spongiibacter          | 11   | 0  |
| Georgenia satyanarayanai                  | 0    | 0  |
| ambiguous_Genus_of_Corynebacteriaceae     | 0    | 0  |
| Brachybacterium sacelli                   | 0    | 0  |
| unknown_Genus_of_Dietziaceae              | 0    | 0  |
| Dietzia lutea                             | 0    | 0  |
| unknown_Species_of_Stackebrandtia         | 0    | 0  |
| unknown_Species_of_Janibacter             | 15   | 0  |
| ambiguous_Species_of_Knoellia             | 0    | 0  |
| Knoellia flava                            | 48   | 0  |
| Microbacterium aquimaris                  | 0    | 0  |
| Microbacterium sp.                        | 0    | 0  |
| Microbacterium suwonense                  | 0    | 0  |
| Arthrobacter bergerei                     | 70   | 0  |
| Arthrobacter sp.                          | 62   | 0  |
| unknown_Species_of_Citricoccus            | 0    | 0  |
| Citricoccus nitrophenolicus               | 0    | 0  |
| ambiguous_Species_of_Mycobacterium        | 14   | 0  |
| unknown_Genus_of_Nakamurellaceae          | 15   | 0  |
| Rhodococcus coprophilus                   | 0    | 0  |
| Nocardioides daejeonensis                 | 0    | 0  |
| ambiguous_Species_of_Nocardiopsis         | 168  | 0  |
| Nocardiopsis listeri                      | 0    | 0  |
| ambiguous_Genus_of_Promicromonosporaceae  | 0    | 0  |
| unknown_Species_of_Myceligenans           | 0    | 0  |
| unknown_Species_of_Microlunatus           | 0    | 0  |
| unknown_Species_of_Propionibacterium      | 18   | 0  |
| Propionibacterium propionicum             | 0    | 0  |
| Saccharopolyspora sp.                     | 1895 | 0  |
| unknown_Species_of_Haloactinobacterium    | 0    | 0  |
| Ruania albidiflava                        | 0    | 0  |
| Streptomyces daliensis                    | 0    | 0  |
| Streptomyces ramulosus                    | 0    | 0  |
| unknown_Species_of_Cytophaga              | 34   | 0  |



|                                          |     |     |
|------------------------------------------|-----|-----|
| Flavobacterium myungsuense               | 0   | 0   |
| Galbibacter marinus                      | 0   | 0   |
| Leeuwenhoekiella palythoae               | 0   | 0   |
| ambiguous_Species_of_Subtaximicrobium    | 0   | 0   |
| unknown_Species_of_Winogradskyella       | 0   | 0   |
| unknown_Species_of_Parapedobacter        | 0   | 0   |
| unknown_Species_of_Alkalibacillus        | 0   | 0   |
| Bacillus thermolactis                    | 14  | 0   |
| Ornithinibacillus sp.                    | 0   | 0   |
| ambiguous_Species_of_Sporosarcina        | 102 | 0   |
| ambiguous_Species_of_Aerococcus          | 0   | 0   |
| Desemzia incerta                         | 32  | 0   |
| Isobaculum melis                         | 33  | 0   |
| unknown_Species_of_Enterococcus          | 43  | 0   |
| Enterococcus asini                       | 0   | 0   |
| Enterococcus phoeniculicola              | 0   | 0   |
| Weissella cibaria                        | 67  | 0   |
| unknown_Genus_of_Catabacteriaceae        | 0   | 0   |
| unknown_Genus_of_Eubacteriaceae          | 387 | 0   |
| unknown_Species_of_Saccharofermentans    | 0   | 0   |
| unknown_Genus_of_Leptotrichiaceae        | 0   | 0   |
| unknown_Species_of_Ketogulonicigenium    | 0   | 0   |
| Paracoccus fistulariae                   | 0   | 0   |
| Paracoccus zeaxanthinifaciens            | 0   | 0   |
| Sphingopyxis litoris                     | 0   | 0   |
| Sphingopyxis sp.                         | 0   | 0   |
| unknown_Genus_of_Campylobacteraceae      | 0   | 0   |
| Acinetobacter radioresistens             | 64  | 102 |
| Pseudomonas litoralis                    | 0   | 0   |
| ambiguous_Species_of_Methylophaga        | 0   | 0   |
| Methylophaga muralis                     | 0   | 0   |
| Methylophaga thiooxydans                 | 0   | 0   |
| Luteimonas lutimaris                     | 0   | 0   |
| Simiduia areninigrae                     | 0   | 0   |
| unknown_Genus_of_Dethiosulfovibrionaceae | 0   | 0   |
| unknown_Genus_of_Synergistaceae          | 27  | 0   |
| unknown_Species_of_Synergistes           | 0   | 0   |
| unknown_Species_of_Actinomyces           | 0   | 0   |
| Actinomyces dentalis                     | 0   | 0   |
| Actinomyces massiliensis                 | 0   | 0   |
| Actinomyces naeslundii                   | 0   | 0   |
| Actinomyces viscosus                     | 0   | 0   |
| Corynebacterium doosanense               | 0   | 0   |
| Corynebacterium kroppenstedtii           | 0   | 0   |
| Corynebacterium suicordis                | 0   | 0   |
| Corynebacterium tuberculostearicum       | 209 | 0   |

|                                       |     |    |
|---------------------------------------|-----|----|
| ambiguous_Species_of_Dermacoccus      | 0   | 0  |
| Dietzia cercidiphylli                 | 0   | 0  |
| Dietzia papillomatosis                | 0   | 0  |
| Cryobacterium arcticum                | 0   | 0  |
| Microbacterium lacticum               | 0   | 0  |
| unknown_Species_of_Mycetocola         | 0   | 0  |
| Kocuria salsicia                      | 0   | 0  |
| Micrococcus cohnii                    | 0   | 0  |
| Rothia dentocariosa                   | 0   | 0  |
| Rothia mucilaginosa                   | 0   | 0  |
| Aeromicrobium halocynthiae            | 0   | 0  |
| Nocardiopsis salina                   | 212 | 0  |
| Propionibacterium granulosum          | 89  | 0  |
| Saccharopolyspora gregorii            | 429 | 34 |
| Saccharopolyspora halophila           | 55  | 97 |
| unknown_Genus_of_Patulibacteraceae    | 0   | 0  |
| unknown_Genus_of_Solirubrobacteraceae | 10  | 0  |
| Porphyromonas catoniae                | 0   | 0  |
| ambiguous_Species_of_Prevotella       | 0   | 0  |
| Olivibacter jilunii                   | 0   | 0  |
| Bacillus circulans                    | 0   | 0  |
| Bacillus simplex                      | 42  | 0  |
| ambiguous_Species_of_Exiguobacterium  | 0   | 0  |
| Gemella haemolysans                   | 0   | 0  |
| Gemella morbillorum                   | 0   | 0  |
| Gemella sanguinis                     | 0   | 0  |
| Brochothrix thermosphacta             | 0   | 0  |
| Paenibacillus camelliae               | 0   | 0  |
| ambiguous_Species_of_Ureibacillus     | 0   | 0  |
| Ureibacillus thermosphaericus         | 0   | 0  |
| Staphylococcus capitis                | 0   | 0  |
| Staphylococcus epidermidis            | 0   | 0  |
| Staphylococcus hominis                | 46  | 0  |
| Staphylococcus jettensis              | 0   | 0  |
| Staphylococcus pasteurii              | 0   | 0  |
| ambiguous_Species_of_Laceyella        | 0   | 0  |
| Abiotrophia defectiva                 | 0   | 0  |
| Granulicatella adiacens               | 33  | 0  |
| ambiguous_Genus_of_Lactobacillaceae   | 0   | 0  |
| ambiguous_Species_of_Lactobacillus    | 26  | 0  |
| Lactobacillus iners                   | 0   | 0  |
| ambiguous_Species_of_Lactococcus      | 61  | 0  |
| Lactococcus lactis                    | 133 | 0  |
| Streptococcus constellatus            | 0   | 0  |
| Streptococcus gordonii                | 0   | 0  |
| Streptococcus infantis                | 0   | 0  |

|                                       |     |    |
|---------------------------------------|-----|----|
| Streptococcus pseudopneumoniae        | 18  | 0  |
| Streptococcus sanguinis               | 0   | 0  |
| Streptococcus thermophilus            | 0   | 0  |
| Anaerococcus murdochii                | 0   | 0  |
| Anaerococcus prevotii                 | 0   | 0  |
| Peptoniphilus gorbachii               | 0   | 0  |
| Eubacterium nodatum                   | 0   | 0  |
| ambiguous_Species_of_Mogibacterium    | 0   | 0  |
| Eubacterium hadrum                    | 13  | 0  |
| ambiguous_Species_of_Roseburia        | 0   | 0  |
| ambiguous_Species_of_Peptoniphilus    | 21  | 0  |
| Filifactor alocis                     | 0   | 0  |
| Peptostreptococcus stomatis           | 0   | 0  |
| Faecalibacterium prausnitzii          | 0   | 0  |
| Ruminococcus bromii                   | 0   | 0  |
| ambiguous_Species_of_Veillonella      | 0   | 0  |
| unknown_Genus_of_Acidaminococcaceae   | 125 | 10 |
| Negativicoccus succinicivorans        | 0   | 0  |
| Selenomonas noxia                     | 0   | 0  |
| Veillonella alcalescens               | 0   | 0  |
| Veillonella parvula                   | 0   | 0  |
| Veillonella rogosae                   | 0   | 0  |
| Veillonella tobetsuensis              | 0   | 0  |
| Brevundimonas vancouveriensis         | 0   | 0  |
| ambiguous_Species_of_Caulobacter      | 0   | 0  |
| Caulobacter segnis                    | 0   | 0  |
| Gemmiger formicilis                   | 0   | 0  |
| Methylobacterium radiotolerans        | 0   | 0  |
| Paracoccus caeni                      | 0   | 0  |
| Bordetella sp.                        | 18  | 0  |
| Ralstonia pickettii                   | 0   | 0  |
| Oxalobacter sp.                       | 0   | 0  |
| Tepidimonas taiwanensis               | 0   | 0  |
| ambiguous_Genus_of_Hydrogenophilaceae | 10  | 0  |
| Neisseria perflava                    | 0   | 0  |
| Neisseria subflava                    | 0   | 0  |
| ambiguous_Species_of_Campylobacter    | 0   | 0  |
| ambiguous_Species_of_Haemophilus      | 0   | 0  |
| Acinetobacter soli                    | 0   | 0  |
| Enhydrobacter aerosaccus              | 48  | 0  |
| Moraxella osloensis                   | 0   | 0  |
| Photobacterium phosphoreum            | 0   | 0  |
| Thermomonas hydrothermalis            | 0   | 0  |
| unknown_Genus_of_Holophagaceae        | 14  | 0  |
| unknown_Species_of_Flaviflexus        | 0   | 0  |
| unknown_Species_of_Mobiluncus         | 0   | 0  |

|                                        |     |    |
|----------------------------------------|-----|----|
| Mobiluncus curtisii                    | 0   | 0  |
| Mobiluncus mulieris                    | 0   | 0  |
| ambiguous_Genus_of_Bogoriellaceae      | 0   | 0  |
| Brevibacterium pityocampae             | 0   | 0  |
| Corynebacterium epidermidicis          | 0   | 0  |
| Corynebacterium freneyi                | 0   | 0  |
| Corynebacterium propinquum             | 0   | 0  |
| Dermabacter hominis                    | 0   | 0  |
| ambiguous_Species_of_Geodermatophilus  | 17  | 0  |
| unknown_Species_of_Knoellia            | 0   | 0  |
| unknown_Species_of_Kineococcus         | 0   | 0  |
| ambiguous_Species_of_Kineococcus       | 0   | 0  |
| Kineococcus radiotolerans              | 0   | 0  |
| Kineococcus sp.                        | 0   | 0  |
| ambiguous_Species_of_Pseudokineococcus | 0   | 0  |
| Agrococcus jenensis                    | 0   | 0  |
| Curtobacterium citreum                 | 0   | 0  |
| Curtobacterium pusillum                | 0   | 0  |
| Gulosibacter molinivorax               | 0   | 0  |
| Leucobacter sp.                        | 0   | 0  |
| Microbacterium phyllosphaerae          | 0   | 0  |
| Arthrobacter gandavensis               | 14  | 0  |
| Kocuria gwangalliensis                 | 0   | 0  |
| ambiguous_Species_of_Nesterenkonia     | 0   | 0  |
| ambiguous_Species_of_Nocardia          | 0   | 0  |
| Rhodococcus cerastii                   | 0   | 10 |
| Nocardioides alpinus                   | 17  | 0  |
| Nocardioides daedukensis               | 29  | 0  |
| Nocardioides islandensis               | 111 | 0  |
| Nocardioides oleivorans                | 101 | 0  |
| Promicromonospora kroppenstedtii       | 0   | 0  |
| Luteococcus japonicus                  | 0   | 0  |
| unknown_Species_of_Tessaracoccus       | 0   | 0  |
| ambiguous_Species_of_Actinoalloteichus | 302 | 0  |
| Pseudonocardia sp.                     | 120 | 0  |
| Streptomyces macrosporus               | 63  | 0  |
| unknown_Species_of_Gaiella             | 468 | 0  |
| Bacteroides massiliensis               | 0   | 0  |
| unknown_Species_of_Prevotella          | 73  | 0  |
| Cytophaga sp.                          | 0   | 0  |
| Hymenobacter metalli                   | 0   | 0  |
| Hymenobacter soli                      | 0   | 0  |
| Chryseobacterium yonginense            | 95  | 0  |
| Epilithonimonas lactis                 | 0   | 0  |
| ambiguous_Species_of_Myroides          | 0   | 0  |
| Myroides odoratimimus                  | 0   | 0  |

|                                              |     |     |
|----------------------------------------------|-----|-----|
| Myroides profundus                           | 0   | 0   |
| unknown_Genus_of_Saprospiraceae              | 0   | 0   |
| Sphingobacterium nematocida                  | 19  | 0   |
| unknown_Genus_of_Dehalococcoidaceae          | 0   | 0   |
| unknown_Genus_of_unclassifiedDehalococcoidia | 105 | 0   |
| unknown_Genus_of_Fibrobacteraceae            | 57  | 0   |
| unknown_Species_of_Fibrobacter               | 88  | 0   |
| Fibrobacter succinogenes subsp. succinogenes | 59  | 0   |
| Bacillus benzoovorans                        | 0   | 0   |
| Bacillus soli                                | 0   | 0   |
| Bacillus thermocloaceae                      | 0   | 0   |
| unknown_Species_of_Gracilibacillus           | 0   | 0   |
| Oceanobacillus caeni                         | 0   | 0   |
| Streptohalobacillus salinus                  | 0   | 0   |
| ambiguous_Species_of_Paenibacillus           | 54  | 45  |
| Paenibacillus illinoisensis                  | 0   | 10  |
| Caryophanon tenue                            | 0   | 0   |
| Planococcus kocurii                          | 0   | 0   |
| unknown_Species_of_Rummeliibacillus          | 18  | 0   |
| Rummeliibacillus pycnus                      | 47  | 0   |
| Jeotgalicoccus halophilus                    | 0   | 0   |
| Staphylococcus simulans                      | 0   | 0   |
| ambiguous_Species_of_Thermoactinomyces       | 643 | 222 |
| Thermoactinomyces vulgaris                   | 702 | 536 |
| unknown_Species_of_Aerococcus                | 0   | 0   |
| unknown_Species_of_Alkalibacterium           | 0   | 0   |
| Alkalibacterium iburiense                    | 0   | 0   |
| unknown_Species_of_Atopococcus               | 0   | 0   |
| Enterococcus cecorum                         | 0   | 0   |
| Enterococcus gallinarum                      | 0   | 0   |
| Leuconostoc carnosum                         | 42  | 0   |
| Weissella paramesenteroides                  | 0   | 0   |
| Lactococcus taiwanensis                      | 127 | 0   |
| unknown_Genus_of_Christensenellaceae         | 120 | 0   |
| Eubacterium ramulus                          | 48  | 0   |
| unknown_Genus_of_Gracilibacteraceae          | 33  | 0   |
| Dorea formicigenerans                        | 36  | 0   |
| unknown_Species_of_Roseburia                 | 233 | 0   |
| [Ruminococcus] gnavus                        | 33  | 0   |
| [Ruminococcus] torques                       | 0   | 0   |
| unknown_Genus_of_Oscillospiraceae            | 0   | 0   |
| unknown_Species_of_Peptoniphilus             | 0   | 0   |
| unknown_Genus_of_Proteinivoraceae            | 46  | 0   |
| ambiguous_Genus_of_Ruminococcaceae           | 31  | 0   |
| unknown_Species_of_Faecalibacterium          | 0   | 0   |
| Ruminococcus flavefaciens                    | 183 | 0   |

|                                           |     |    |
|-------------------------------------------|-----|----|
| unknown_Genus_of_Fusobacteriaceae         | 0   | 0  |
| unknown_Species_of_Camelimonas            | 0   | 0  |
| ambiguous_Species_of_Ochrobactrum         | 0   | 0  |
| Pseudochrobactrum saccharolyticum         | 0   | 25 |
| ambiguous_Genus_of_Methylobacteriaceae    | 0   | 0  |
| Methylobacterium cerastii                 | 0   | 0  |
| Methylobacterium gossypiicola             | 0   | 78 |
| Microvirga aerilata                       | 157 | 0  |
| Microvirga aerophila                      | 0   | 0  |
| Donghicola eburneus                       | 0   | 0  |
| Paracoccus marinus                        | 0   | 0  |
| unknown_Species_of_Sphingomicrobium       | 0   | 0  |
| Sphingomonas abaci                        | 0   | 56 |
| Sphingomonas ginsengisoli                 | 34  | 0  |
| Sphingomonas kaistensis                   | 0   | 0  |
| Sphingomonas sediminicola                 | 179 | 0  |
| Alcaligenes sp.                           | 46  | 0  |
| unknown_Species_of_Eoetvoesia             | 0   | 0  |
| Parapusillimonas granuli                  | 0   | 0  |
| ambiguous_Species_of_Pusillimonas         | 0   | 0  |
| unknown_Genus_of_Comamonadaceae           | 320 | 10 |
| Massilia jejuensis                        | 11  | 0  |
| unknown_Genus_of_Sutterellaceae           | 76  | 0  |
| Iodobacter arcticus                       | 0   | 0  |
| unknown_Genus_of_Nitrosomonadaceae        | 40  | 0  |
| unknown_Genus_of_Myxococcaceae            | 17  | 0  |
| unknown_Genus_of_Succinivibrionaceae      | 0   | 0  |
| unknown_Species_of_Aliidiomarina          | 0   | 0  |
| Idiomarina sp.                            | 0   | 0  |
| ambiguous_Genus_of_Pseudoalteromonadaceae | 0   | 0  |
| ambiguous_Genus_of_Psychromonadaceae      | 0   | 0  |
| ambiguous_Species_of_Shewanella           | 0   | 0  |
| unknown_Genus_of_Arenicellaceae           | 84  | 0  |
| unknown_Species_of_Rheinheimera           | 0   | 0  |
| Rheinheimera aquimaris                    | 0   | 0  |
| Rheinheimera pacifica                     | 0   | 0  |
| Rheinheimera perlucida                    | 0   | 0  |
| Rheinheimera sp.                          | 0   | 0  |
| unknown_Genus_of_Thioalkalispiraceae      | 0   | 0  |
| ambiguous_Species_of_Enterobacter         | 0   | 0  |
| Erwinia tasmaniensis                      | 0   | 39 |
| unknown_Genus_of_Coxiellaceae             | 0   | 0  |
| unknown_Species_of_Halomonas              | 0   | 0  |
| Halomonas beimenensis                     | 0   | 0  |
| Halomonas pantelleriensis                 | 0   | 0  |
| Pseudomonas xanthomarina                  | 0   | 0  |

|                                        |     |    |
|----------------------------------------|-----|----|
| ambiguous_Genus_of_Thiotrichaceae      | 0   | 0  |
| Lysobacter xinjiangensis               | 81  | 0  |
| Treponema calligyrum                   | 0   | 0  |
| Illumatobacter nonamiense              | 0   | 0  |
| unknown_Species_of_Iamia               | 34  | 0  |
| unknown_Genus_of_Acidothermaceae       | 35  | 0  |
| ambiguous_Species_of_Actinomyces       | 0   | 0  |
| unknown_Genus_of_Actinopolysporaceae   | 0   | 27 |
| Catenulispora graminis                 | 0   | 0  |
| unknown_Genus_of_Geodermatophilaceae   | 36  | 0  |
| Arsenicicoccus bolidensis              | 37  | 0  |
| Tetrasphaera duodecadis                | 15  | 0  |
| unknown_Species_of_Jiangella           | 0   | 0  |
| ambiguous_Species_of_Agromyces         | 0   | 0  |
| Leucobacter tardus                     | 10  | 0  |
| Mycetocola reblochoni                  | 0   | 0  |
| Longispora fulva                       | 14  | 0  |
| unknown_Genus_of_Mycobacteriaceae      | 10  | 38 |
| ambiguous_Species_of_Kribbella         | 10  | 0  |
| Nocardioides aestuarii                 | 14  | 0  |
| Nocardioides agariphilus               | 0   | 0  |
| Nocardioides dilutus                   | 21  | 0  |
| Nocardioides halotolerans              | 0   | 0  |
| unknown_Species_of_Nocardiopsis        | 62  | 0  |
| Nocardiopsis alba                      | 59  | 0  |
| Nocardiopsis chromatogenes             | 0   | 0  |
| Nocardiopsis dassonvillei              | 20  | 0  |
| Nocardiopsis halotolerans              | 0   | 0  |
| Nocardiopsis lucentensis               | 0   | 0  |
| Nocardiopsis nikkonensis               | 80  | 0  |
| unknown_Genus_of_Promicromonosporaceae | 0   | 0  |
| ambiguous_Species_of_Isoptericola      | 0   | 0  |
| Actinomycetospora sp.                  | 0   | 0  |
| unknown_Species_of_Prauserella         | 0   | 0  |
| ambiguous_Species_of_Pseudonocardia    | 13  | 10 |
| Saccharomonospora azurea               | 103 | 0  |
| Saccharopolyspora cebuensis            | 0   | 0  |
| Saccharopolyspora hordei               | 34  | 0  |
| Saccharopolyspora pogona               | 0   | 0  |
| Saccharopolyspora reactivirgula        | 115 | 39 |
| Saccharopolyspora spinosa              | 0   | 0  |
| Streptomyces acidiscabies              | 11  | 0  |
| Streptomyces carpaticus                | 76  | 0  |
| Streptomyces cheonanensis              | 41  | 0  |
| Streptomyces guanduensis               | 14  | 0  |
| Streptomyces xiamenensis               | 62  | 0  |

|                                         |      |   |
|-----------------------------------------|------|---|
| unknown_Genus_of_Thermomonosporaceae    | 28   | 0 |
| unknown_Genus_of_Gaiellaceae            | 484  | 0 |
| unknown_Genus_of_Rubrobacteraceae       | 135  | 0 |
| unknown_Species_of_Solirubrobacter      | 29   | 0 |
| unknown_Genus_of_Marinilabiliaceae      | 0    | 0 |
| unknown_Genus_of_Rikenellaceae          | 147  | 0 |
| Chryseobacterium chaponense             | 0    | 0 |
| Flavobacterium sinopsychrotolerans      | 0    | 0 |
| unknown_Genus_of_Rhabdochlamydiaceae    | 0    | 0 |
| unknown_Genus_of_Herpetosiphonaceae     | 0    | 0 |
| Bacillus clausii                        | 1244 | 0 |
| Bacillus idriensis                      | 65   | 0 |
| Bacillus kribbensis                     | 15   | 0 |
| Bacillus licheniformis                  | 4896 | 0 |
| Bacillus rhizosphaerae                  | 3373 | 0 |
| ambiguous_Species_of_Gracilibacillus    | 0    | 0 |
| ambiguous_Species_of_Marinococcus       | 0    | 0 |
| Ornithinibacillus halophilus            | 158  | 0 |
| ambiguous_Species_of_Psychrobacillus    | 0    | 0 |
| ambiguous_Species_of_Terribacillus      | 47   | 0 |
| Virgibacillus pantothenicus             | 0    | 0 |
| unknown_Genus_of_Paenibacillaceae       | 144  | 0 |
| ambiguous_Genus_of_Paenibacillaceae     | 36   | 0 |
| Planococcus antarcticus                 | 0    | 0 |
| unknown_Species_of_Melghirimyces        | 0    | 0 |
| Melghirimyces thermohalophilus          | 66   | 0 |
| unknown_Species_of_Thermoactinomyces    | 65   | 0 |
| Thermoactinomyces intermedius           | 0    | 0 |
| unknown_Species_of_Thermoflavimicrobium | 0    | 0 |
| Enterococcus sp.                        | 0    | 0 |
| unknown_Genus_of_Leuconostocaceae       | 0    | 0 |
| Clostridium sp.                         | 29   | 0 |
| unknown_Species_of_Acidaminobacter      | 0    | 0 |
| unknown_Species_of_Eubacterium          | 0    | 0 |
| Roseburia faecis                        | 60   | 0 |
| unknown_Species_of_Acetivibrio          | 95   | 0 |
| Ruminococcus faecis                     | 38   | 0 |
| Ruminococcus sp.                        | 0    | 0 |
| unknown_Species_of_Nitrospira           | 20   | 0 |
| Bradyrhizobium canariense               | 0    | 0 |
| Rhodoblastus sphagnicola                | 0    | 0 |
| ambiguous_Species_of_Salinarimonas      | 0    | 0 |
| Rhodoplanes sp.                         | 0    | 0 |
| unknown_Species_of_Thermovum            | 30   | 0 |
| Ensifer(Sinorhizobium) adhaerens        | 0    | 0 |
| Bauldia litoralis                       | 0    | 0 |



|                                       |     |     |
|---------------------------------------|-----|-----|
| unknown_Species_of_Rhodovulum         | 0   | 0   |
| Skermanella aerolata                  | 120 | 0   |
| unknown_Genus_of_Holosporaceae        | 13  | 0   |
| unknown_Genus_of_Geminicoccus         | 67  | 0   |
| Thiobacillus denitrificans            | 0   | 0   |
| unknown_Genus_of_Chromobacteriaceae   | 0   | 0   |
| unknown_Genus_of_Desulfonatronumaceae | 0   | 0   |
| unknown_Genus_of_Phaselicystidaceae   | 0   | 0   |
| Hafnia paralvei                       | 0   | 0   |
| Rosenbergiella nectarea               | 171 | 0   |
| Serratia quinivorans                  | 20  | 0   |
| Luteimonas abyssi                     | 37  | 0   |
| Frankia sp.                           | 35  | 0   |
| unknown_Genus_of_Glycomycetaceae      | 0   | 0   |
| Propionibacterium sp.                 | 0   | 0   |
| unknown_Species_of_Saccharomonospora  | 0   | 0   |
| Sanguibacter keddiei                  | 10  | 103 |
| Streptomyces sedi                     | 0   | 0   |
| Olivibacter terrae                    | 0   | 0   |
| Lactobacillus hayakitensis            | 84  | 0   |
| unknown_Species_of_Jahnella           | 0   | 0   |
| Cronobacter turicensis                | 0   | 10  |
| unknown_Species_of_Serratia           | 0   | 0   |
| Pseudomonas thermotolerans            | 0   | 0   |
| Pseudoxanthomonas spadix              | 0   | 0   |
| unknown_Species_of_Eggerthella        | 0   | 0   |
| unknown_Species_of_Rufibacter         | 0   | 0   |
| Aequorivita capsosiphonis             | 0   | 0   |
| unknown_Species_of_Gelidibacter       | 0   | 0   |
| Gelidibacter mesophilus               | 0   | 0   |
| unknown_Species_of_Salegentibacter    | 0   | 0   |
| Salegentibacter salarius              | 0   | 0   |
| Salinimicrobium marinum               | 0   | 0   |
| Vitellibacter aestuarii               | 0   | 0   |
| unknown_Genus_of_Ardenticatenaceae    | 0   | 10  |
| Lysinibacillus meyeri                 | 157 | 0   |
| unknown_Species_of_Saccharibacillus   | 0   | 0   |
| Aureimonas phyllosphaerae             | 0   | 32  |
| ambiguous_Species_of_Phyllobacterium  | 0   | 0   |
| Paracoccus limosus                    | 0   | 0   |
| Sphingomonas endophytica              | 0   | 46  |
| Sphingomonas paucimobilis             | 0   | 99  |
| Sphingomonas yabuuchiae               | 0   | 0   |
| Oxalicibacterium flavum               | 0   | 0   |
| Aquabacterium citratiphilum           | 0   | 0   |
| Tepidiphilus margaritifer             | 0   | 0   |

|                                              |     |     |
|----------------------------------------------|-----|-----|
| unknown_Genus_of_Sandaracinaceae             | 0   | 0   |
| Rheinheimera chironomi                       | 0   | 0   |
| Citrobacter gillenii                         | 0   | 0   |
| Escherichia vulneris                         | 0   | 0   |
| Pantoea cyripedii                            | 0   | 0   |
| Yokenella regensburgei                       | 0   | 0   |
| unknown_Species_of_Amphritea                 | 0   | 0   |
| Pseudomonas abietaniphila                    | 0   | 0   |
| Pseudomonas psychrotolerans                  | 0   | 135 |
| Thioalkalimicrobium cyclicum                 | 0   | 0   |
| unknown_Genus_of_Sinobacteraceae             | 10  | 0   |
| Stenotrophomonas terrae                      | 0   | 0   |
| unknown_Species_of_Opitutus                  | 0   | 0   |
| ambiguous_Species_of_Modestobacter           | 35  | 0   |
| Kineococcus glutinatus                       | 0   | 0   |
| unknown_Species_of_Leifsonia                 | 0   | 0   |
| Microbacterium mitrae                        | 0   | 0   |
| Arthrobacter viscosus                        | 0   | 0   |
| Yaniella halotolerans                        | 0   | 0   |
| unknown_Species_of_Promicromonospora         | 0   | 0   |
| ambiguous_Genus_of_Sporichthyaceae           | 0   | 0   |
| Patulibacter ginsengiterrae                  | 0   | 0   |
| unknown_Species_of_Dyadobacter               | 0   | 0   |
| unknown_Species_of_Lishizhenia               | 0   | 0   |
| unknown_Species_of_Aquimarina                | 0   | 0   |
| Empedobacter brevis                          | 0   | 0   |
| Flavobacterium flevense                      | 0   | 0   |
| Flavobacterium subsaxonicum                  | 0   | 0   |
| unknown_Species_of_Galbibacter               | 0   | 0   |
| Ulvibacter antarcticus                       | 0   | 0   |
| unknown_Species_of_CandidatusRhabdochlamydia | 0   | 0   |
| Paenibacillus xinjiangensis                  | 0   | 0   |
| unknown_Species_of_Salinicoccus              | 0   | 0   |
| Shimazuella kribbensis                       | 0   | 0   |
| Carnobacterium jeotgali                      | 125 | 0   |
| unknown_Species_of_Aureimonas                | 0   | 0   |
| ambiguous_Species_of_Afipia                  | 0   | 0   |
| unknown_Species_of_Pseudochrobactrum         | 0   | 0   |
| Pseudochrobactrum lubricantis                | 0   | 0   |
| unknown_Species_of_Aminobacter               | 0   | 0   |
| unknown_Species_of_Sphingobium               | 0   | 0   |
| Sphingobium chungbukense                     | 0   | 0   |
| Sphingobium rhizovicinum                     | 0   | 0   |
| Advenella sp.                                | 0   | 0   |
| Bordetella ansorpii                          | 0   | 0   |
| Pusillimonas harenae                         | 0   | 0   |

|                                                   |    |    |
|---------------------------------------------------|----|----|
| Comamonas terrigena                               | 0  | 0  |
| unknown_Species_of_Pseudorhodoferax               | 0  | 0  |
| unknown_Species_of_Simplicispira                  | 0  | 0  |
| unknown_Species_of_Variovorax                     | 0  | 19 |
| ambiguous_Species_of_Herbaspirillum               | 0  | 49 |
| Herbaspirillum frisingense                        | 0  | 0  |
| ambiguous_Genus_of_Bacteriovoracaceae             | 0  | 0  |
| unknown_Genus_of_Cystobacteraceae                 | 0  | 0  |
| unknown_Species_of_Saccharophagus                 | 0  | 0  |
| unknown_Genus_of_Alteromonadalesgeneraincertaedis | 0  | 0  |
| Serratia proteamaculans                           | 0  | 0  |
| unknown_Genus_of_Legionellaceae                   | 0  | 0  |
| ambiguous_Species_of_Halomonas                    | 0  | 24 |
| Halomonas muralis                                 | 0  | 0  |
| unknown_Species_of_Halotalea                      | 0  | 0  |
| unknown_Species_of_Azotobacter                    | 0  | 0  |
| Pseudomonas aeruginosa                            | 0  | 0  |
| Pseudomonas borbori                               | 0  | 0  |
| Pseudomonas caeni                                 | 0  | 0  |
| Pseudomonas pseudoalcaligenes                     | 0  | 0  |
| unknown_Genus_of_Vibrionaceae                     | 0  | 0  |
| Luteimonas aestuarii                              | 0  | 0  |
| Lysobacter concretionis                           | 0  | 0  |
| unknown_Genus_of_Bryobacter                       | 13 | 0  |
| Iamia sp.                                         | 10 | 0  |
| ambiguous_Genus_of_Catenulisporaceae              | 14 | 0  |
| ambiguous_Species_of_Cryptosporangium             | 10 | 0  |
| Geodermatophilus siccatus                         | 24 | 0  |
| unknown_Species_of_Modestobacter                  | 11 | 0  |
| Humibacillus xanthopallidus                       | 11 | 0  |
| Tetrasphaera elongata                             | 10 | 0  |
| ambiguous_Genus_of_Jiangellaceae                  | 10 | 0  |
| Angustibacter peucedani                           | 17 | 0  |
| Frondihabitans sp.                                | 30 | 0  |
| Arthrobacter ruscicus                             | 11 | 0  |
| Virgisporangium ochraceum                         | 37 | 0  |
| ambiguous_Genus_of_Nakamurellaceae                | 11 | 0  |
| Rhodococcus artemisiae                            | 13 | 0  |
| Nocardioides hwasunensis                          | 61 | 0  |
| unknown_Genus_of_Nocardiopsaceae                  | 46 | 0  |
| Nocardiopsis exhalans                             | 10 | 0  |
| Actinoalloteichus cyanogriseus                    | 23 | 0  |
| Actinoalloteichus hymeniacidonis                  | 52 | 0  |
| ambiguous_Species_of_Actinomycetospora            | 15 | 0  |
| Saccharopolyspora shandongensis                   | 32 | 0  |
| ambiguous_Species_of_Streptacidiphilus            | 36 | 0  |

|                                                |     |   |
|------------------------------------------------|-----|---|
| Streptomyces sodiiphilus                       | 24  | 0 |
| unknown_Genus_of_unclassifiedPseudonocardineae | 12  | 0 |
| unknown_Species_of_Denitrobacterium            | 12  | 0 |
| unknown_Genus_of_Armatimonadaceae              | 15  | 0 |
| Cloacibacterium normanense                     | 17  | 0 |
| Pseudosphingobacterium domesticum              | 10  | 0 |
| unknown_Genus_of_Roseiflexaceae                | 10  | 0 |
| unknown_Genus_of_Spirulinaceae                 | 35  | 0 |
| unknown_Species_of_Crinalium                   | 103 | 0 |
| Crinalium epipsammum                           | 147 | 0 |
| Bacillus litoralis                             | 36  | 0 |
| Bacillus sonorensis                            | 10  | 0 |
| Lysinibacillus contaminans                     | 31  | 0 |
| Oceanobacillus kimchii                         | 37  | 0 |
| Virgibacillus byunsanensis                     | 30  | 0 |
| ambiguous_Species_of_Ammoniphilus              | 12  | 0 |
| Ammoniphilus oxalaticus                        | 59  | 0 |
| Paenibacillus alvei                            | 20  | 0 |
| Paenibacillus ginsengisoli                     | 26  | 0 |
| Sporosarcina sp.                               | 12  | 0 |
| ambiguous_Species_of_Leuconostoc               | 72  | 0 |
| Clostridium butyricum                          | 17  | 0 |
| Clostridium saccharoperbutylacetonicum         | 10  | 0 |
| unknown_Species_of_Salimesophilobacter         | 12  | 0 |
| unknown_Species_of_Fusibacter                  | 10  | 0 |
| Eubacterium ventriosum                         | 31  | 0 |
| Butyrivibrio crossotus                         | 12  | 0 |
| unknown_Species_of_Lachnobacterium             | 11  | 0 |
| Ruminococcus gnavus                            | 136 | 0 |
| Anaerococcus sp.                               | 12  | 0 |
| unknown_Species_of_Parvularcula                | 11  | 0 |
| Methylocella sp.                               | 16  | 0 |
| unknown_Species_of_Hyphomicrobium              | 12  | 0 |
| Methylobacterium jeotgali                      | 12  | 0 |
| Microvirga sp.                                 | 11  | 0 |
| unknown_Species_of_Methylarcula                | 12  | 0 |
| Pelagibius litoralis                           | 41  | 0 |
| unknown_Species_of_Skermanella                 | 11  | 0 |
| Sphingomonas japonica                          | 12  | 0 |
| Sphingomonas sanxanigenens                     | 27  | 0 |
| Polynucleobacter necessarius                   | 10  | 0 |
| Delftia litopenaei                             | 43  | 0 |
| unknown_Species_of_Methylibium                 | 23  | 0 |
| Polaromonas sp.                                | 23  | 0 |
| Variovorax sp.                                 | 10  | 0 |
| Herminiimonas fonticola                        | 129 | 0 |

|                                                  |    |   |
|--------------------------------------------------|----|---|
| unknown_Species_of_Thiobacillus                  | 14 | 0 |
| ambiguous_Species_of_Methylobacillus             | 10 | 0 |
| Methylobacillus sp.                              | 53 | 0 |
| unknown_Species_of_CandidatusDactylopiibacterium | 32 | 0 |
| Thauera sp.                                      | 10 | 0 |
| unknown_Genus_of_Desulfuromonadaceae             | 25 | 0 |
| Geobacter psychrophilus                          | 10 | 0 |
| unknown_Genus_of_Anaeromyxobacteraceae           | 10 | 0 |
| unknown_Genus_of_Kofleriaceae                    | 11 | 0 |
| ambiguous_Genus_of_Myxococcaceae                 | 10 | 0 |
| ambiguous_Species_of_Microbulbifer               | 10 | 0 |
| Microbulbifer marinus                            | 45 | 0 |
| Trabulsiella odontotermitis                      | 10 | 0 |
| ambiguous_Species_of_Yersinia                    | 19 | 0 |
| Yersinia intermedia                              | 26 | 0 |
| Steroidobacter denitrificans                     | 11 | 0 |
| unknown_Species_of_Ignatzschineria               | 11 | 0 |
| unknown_Genus_of_Chthoniobacter                  | 12 | 0 |
| Nesterenkonia alba                               | 0  | 0 |
| Prauserella sp.                                  | 0  | 0 |
| unknown_Species_of_Geofilum                      | 0  | 0 |
| Mariniflexile sp.                                | 0  | 0 |
| unknown_Species_of_Sediminibacter                | 0  | 0 |
| unknown_Species_of_Zobellia                      | 0  | 0 |
| unknown_Species_of_[Ruminococcus]                | 0  | 0 |
| unknown_Species_of_Oscillibacter                 | 0  | 0 |
| unknown_Genus_of_Oligosphaeraceae                | 0  | 0 |
| Pelistega sp.                                    | 0  | 0 |
| Hydrogenophaga flava                             | 0  | 0 |
| ambiguous_Species_of_Thauera                     | 0  | 0 |
| Arcobacter trophiarum                            | 0  | 0 |
| Alcanivorax indicus                              | 0  | 0 |
| unknown_Species_of_Beggiatoa                     | 0  | 0 |
| Luteibacter rhizovicius                          | 0  | 0 |
| Luteimonas marina                                | 0  | 0 |
| Arcanobacterium hippocoleae                      | 0  | 0 |
| Corynebacterium uterequi                         | 0  | 0 |
| unknown_Species_of_Oryzihumus                    | 0  | 0 |
| unknown_Species_of_Propioniferax                 | 0  | 0 |
| Rhizobium daejeonense                            | 0  | 0 |
| ambiguous_Species_of_Ketogulonicigenium          | 0  | 0 |
| ambiguous_Genus_of_Methylophilaceae              | 0  | 0 |
| unknown_Species_of_Desulfovibrio                 | 0  | 0 |
| unknown_Genus_of_Cardiobacteriaceae              | 0  | 0 |
| Dyella sp.                                       | 0  | 0 |
| Fulvimonas soli                                  | 0  | 0 |

|                                        |   |    |
|----------------------------------------|---|----|
| unknown_Genus_of_Mariprofundaceae      | 0 | 0  |
| unknown_Species_of_Treponema           | 0 | 0  |
| Beutenbergia cavernae                  | 0 | 0  |
| Leifsonia kribbensis                   | 0 | 0  |
| Microbacterium foliorum                | 0 | 14 |
| Yaniella flava                         | 0 | 0  |
| Leadbetterella byssophila              | 0 | 0  |
| unknown_Genus_of_Caldilineaceae        | 0 | 0  |
| Atopostipes sp.                        | 0 | 0  |
| unknown_Species_of_Jeotgalibaca        | 0 | 0  |
| Trichococcus flocculiformis            | 0 | 0  |
| Enterococcus casseliflavus             | 0 | 0  |
| Enterococcus saccharolyticus           | 0 | 0  |
| Devosia albogilva                      | 0 | 0  |
| Devosia terrae                         | 0 | 0  |
| Devosia yakushimensis                  | 0 | 0  |
| Loktanella hongkongensis               | 0 | 0  |
| ambiguous_Species_of_Rhodovulum        | 0 | 0  |
| Sphingopyxis alaskensis                | 0 | 0  |
| Bordetella trematum                    | 0 | 0  |
| unknown_Species_of_Parapusillimonas    | 0 | 0  |
| ambiguous_Species_of_Giesbergeria      | 0 | 0  |
| unknown_Species_of_Hydrogenophaga      | 0 | 0  |
| Simplicispira metamorpha               | 0 | 0  |
| Vitreoscilla stercoraria               | 0 | 0  |
| unknown_Genus_of_Thermithiobacillaceae | 0 | 0  |
| unknown_Species_of_Ectothiorhodosinus  | 0 | 0  |
| ambiguous_Species_of_Buttiauxella      | 0 | 0  |
| Enterobacter amnigenus                 | 0 | 0  |
| Plesiomonas shigelloides               | 0 | 47 |
| Legionella lytica                      | 0 | 0  |
| unknown_Species_of_Methylohalobius     | 0 | 0  |
| Thalassolituus oleivorans              | 0 | 0  |
| unknown_Species_of_Perlucidibaca       | 0 | 0  |
| Pseudomonas otitidis                   | 0 | 0  |
| Acholeplasma cavagenitalium            | 0 | 0  |
| Modestobacter multiseptatus            | 0 | 0  |
| unknown_Genus_of_Jonesiaceae           | 0 | 0  |
| Labeledella gwakjiensis                | 0 | 0  |
| Rhodococcus sp.                        | 0 | 0  |
| Aeromicrobium fastidiosum              | 0 | 0  |
| Actinomycetospora chiangmaiensis       | 0 | 0  |
| unknown_Genus_of_Ruaniaceae            | 0 | 0  |
| unknown_Species_of_Sanguibacter        | 0 | 0  |
| Streptacidiphilus sp.                  | 0 | 0  |
| Streptomyces rapamycinicus             | 0 | 0  |

|                                          |   |    |
|------------------------------------------|---|----|
| unknown_Genus_of_Nitriliruptoraceae      | 0 | 0  |
| Bacteroides vulgatus                     | 0 | 0  |
| unknown_Species_of_Gilvibacter           | 0 | 0  |
| Paenisporosarcina quisquiliarum          | 0 | 0  |
| unknown_Genus_of_Victivallaceae          | 0 | 13 |
| Brevundimonas aurantiaca                 | 0 | 0  |
| Brevundimonas basaltis                   | 0 | 0  |
| Phenylobacterium immobile                | 0 | 0  |
| Bartonella rattaaustraliani              | 0 | 0  |
| unknown_Species_of_Rhodoplanes           | 0 | 0  |
| Methylobacterium mesophilicum            | 0 | 39 |
| Aliihoeflea aestuarii                    | 0 | 0  |
| Rhizobium rosettiformans                 | 0 | 0  |
| ambiguous_Genus_of_Xanthobacteraceae     | 0 | 0  |
| unknown_Genus_of_unclassifiedRhizobiales | 0 | 0  |
| Paracoccus yeei                          | 0 | 0  |
| Rhodobacter blasticus                    | 0 | 0  |
| Roseococcus suduntuyensis                | 0 | 0  |
| Sphingomonas pituitosa                   | 0 | 0  |
| unknown_Species_of_Stakelama             | 0 | 0  |
| Achromobacter sp.                        | 0 | 28 |
| Oxalicibacterium horti                   | 0 | 0  |
| ambiguous_Genus_of_Chromobacteriaceae    | 0 | 0  |
| ambiguous_Genus_of_Neisseriaceae         | 0 | 0  |
| unknown_Species_of_Marinobacter          | 0 | 0  |
| Marinobacter sp.                         | 0 | 0  |
| ambiguous_Species_of_Saccharophagus      | 0 | 0  |
| unknown_Genus_of_Pseudoalteromonadaceae  | 0 | 0  |
| Halomonas koreensis                      | 0 | 0  |
| Haemophilus haemolyticus                 | 0 | 0  |
| unknown_Species_of_Dasania               | 0 | 0  |
| unknown_Species_of_Arenimonas            | 0 | 0  |
| unknown_Species_of_Xanthomonas           | 0 | 0  |
| unknown_Genus_of_OMGgroup                | 0 | 0  |
| unknown_Genus_of_Opitutaceae             | 0 | 0  |
| ambiguous_Genus_of_Brevibacteriaceae     | 0 | 0  |
| Corynebacterium hansenii                 | 0 | 0  |
| Demequina lutea                          | 0 | 0  |
| unknown_Species_of_Helcobacillus         | 0 | 0  |
| Modestobacter sp.                        | 0 | 0  |
| Janibacter corallicola                   | 0 | 0  |
| Leifsonia sp.                            | 0 | 0  |
| Leucobacter denitrificans                | 0 | 0  |
| Microbacterium halophilum                | 0 | 0  |
| Microbacterium sediminis                 | 0 | 0  |
| Pseudoclavibacter bifida                 | 0 | 0  |

|                                         |   |    |
|-----------------------------------------|---|----|
| Pseudoclavibacter sp.                   | 0 | 0  |
| Arthrobacter monumenti                  | 0 | 0  |
| Arthrobacter pigmenti                   | 0 | 0  |
| Micrococcus luteus                      | 0 | 0  |
| Rothia nasimurium                       | 0 | 0  |
| Rothia terrae                           | 0 | 0  |
| ambiguous_Genus_of_Streptosporangiaceae | 0 | 0  |
| unknown_Genus_of_Hydrogenothermaceae    | 0 | 0  |
| Hymenobacter perfusus                   | 0 | 0  |
| Aequorivita sp.                         | 0 | 0  |
| Chryseobacterium gregarium              | 0 | 0  |
| ambiguous_Species_of_Mesonina           | 0 | 0  |
| Salegentibacter sp.                     | 0 | 0  |
| Salinimicrobium sp.                     | 0 | 0  |
| Sphingobacterium kitahiroshimense       | 0 | 0  |
| unknown_Genus_of_Pseudanabaenaceae      | 0 | 0  |
| Bacillus graminis                       | 0 | 10 |
| Bacillus herbersteinensis               | 0 | 0  |
| Marinococcus halotolerans               | 0 | 0  |
| Kurthia sp.                             | 0 | 0  |
| ambiguous_Genus_of_Staphylococcaceae    | 0 | 0  |
| unknown_Species_of_Macrococcus          | 0 | 0  |
| Salinicoccus halitifaciens              | 0 | 0  |
| Salinicoccus roseus                     | 0 | 0  |
| Facklamia languida                      | 0 | 0  |
| Ignavigranum ruoffiae                   | 0 | 0  |
| Marinilactibacillus psychrotolerans     | 0 | 0  |
| unknown_Species_of_Bavariicoccus        | 0 | 0  |
| unknown_Genus_of_Streptococcaceae       | 0 | 0  |
| Lactococcus plantarum                   | 0 | 0  |
| Streptococcus dentasini                 | 0 | 0  |
| Streptococcus hyovaginalis              | 0 | 0  |
| Streptococcus merionis                  | 0 | 0  |
| Streptococcus ovis                      | 0 | 0  |
| Streptococcus plurextorum               | 0 | 0  |
| Streptococcus porci                     | 0 | 0  |
| Streptococcus pyogenes                  | 0 | 0  |
| Streptococcus rupicaprae                | 0 | 0  |
| Streptococcus suis                      | 0 | 0  |
| Clostridium chromiireducens             | 0 | 0  |
| Peptostreptococcus anaerobius           | 0 | 0  |
| unknown_Species_of_Erysipelothrix       | 0 | 0  |
| unknown_Species_of_Brevundimonas        | 0 | 0  |
| Nitratireductor sp.                     | 0 | 0  |
| unknown_Species_of_Parvibaculum         | 0 | 0  |
| unknown_Species_of_Loktanella           | 0 | 0  |



|                                     |   |   |
|-------------------------------------|---|---|
| ambiguous_Species_of_Lautropia      | 0 | 0 |
| Lautropia sp.                       | 0 | 0 |
| unknown_Species_of_Methylophilus    | 0 | 0 |
| unknown_Species_of_Methylovorus     | 0 | 0 |
| unknown_Species_of_Aquaspirillum    | 0 | 0 |
| unknown_Species_of_Alysiella        | 0 | 0 |
| ambiguous_Species_of_Alysiella      | 0 | 0 |
| Alysiella crassa                    | 0 | 0 |
| unknown_Species_of_Bergeriella      | 0 | 0 |
| Kingella denitrificans              | 0 | 0 |
| Neisseria bacilliformis             | 0 | 0 |
| Neisseria canis                     | 0 | 0 |
| Neisseria shayeganii                | 0 | 0 |
| Neisseria wadsworthii               | 0 | 0 |
| Uruburuella suis                    | 0 | 0 |
| unknown_Species_of_Denitromonas     | 0 | 0 |
| Thauera phenylacetica               | 0 | 0 |
| Bacteriovorax sp.                   | 0 | 0 |
| Arcobacter sp.                      | 0 | 0 |
| Suttonella ornithocola              | 0 | 0 |
| Mangrovibacter plantisponsor        | 0 | 0 |
| unknown_Species_of_Photorhabdus     | 0 | 0 |
| Xenorhabdus bovienii                | 0 | 0 |
| Legionella oakridgensis             | 0 | 0 |
| unknown_Species_of_Pseudospirillum  | 0 | 0 |
| Actinobacillus hominis              | 0 | 0 |
| Actinobacillus lignieresii          | 0 | 0 |
| Actinobacillus suis                 | 0 | 0 |
| unknown_Species_of_Aggregatibacter  | 0 | 0 |
| unknown_Species_of_Avibacterium     | 0 | 0 |
| unknown_Species_of_Lonepinella      | 0 | 0 |
| Mannheimia varigena                 | 0 | 0 |
| Pasteurella caballi                 | 0 | 0 |
| Moraxella canis                     | 0 | 0 |
| Moraxella oblonga                   | 0 | 0 |
| unknown_Species_of_Pseudofulvimonas | 0 | 0 |
| unknown_Species_of_Sphaerochaeta    | 0 | 0 |
| Sphaerochaeta sp.                   | 0 | 0 |
| ambiguous_Species_of_Acholeplasma   | 0 | 0 |
| Acholeplasma hippikon               | 0 | 0 |
| unknown_Genus_of_Spiroplasmataceae  | 0 | 0 |
| Corynebacterium nuruki              | 0 | 0 |
| Blastococcus sp.                    | 0 | 0 |
| Geodermatophilus soli               | 0 | 0 |
| ambiguous_Species_of_Jonesia        | 0 | 0 |
| Jonesia quinghaiensis               | 0 | 0 |

|                                     |   |   |
|-------------------------------------|---|---|
| Nocardioides kongjuensis            | 0 | 0 |
| Pseudonocardia antitumoralis        | 0 | 0 |
| Sanguibacter marinus                | 0 | 0 |
| Sanguibacter suarezii               | 0 | 0 |
| unknown_Species_of_Adlercreutzia    | 0 | 0 |
| unknown_Genus_of_Prolixibacteraceae | 0 | 0 |
| unknown_Species_of_Cryomorpha       | 0 | 0 |
| Flavobacterium aquatile             | 0 | 0 |
| Flavobacterium macrobrachii         | 0 | 0 |
| Flavobacterium oncorhynchi          | 0 | 0 |
| unknown_Species_of_Mariniflexile    | 0 | 0 |
| Mesonina ostreae                    | 0 | 0 |
| unknown_Species_of_Muricauda        | 0 | 0 |
| Sediminibacter sp.                  | 0 | 0 |
| Sphingobacterium bambusae           | 0 | 0 |
| Psychrobacillus psychrodurans       | 0 | 0 |
| Paenibacillus daejeonensis          | 0 | 0 |
| Paenibacillus montaniterrae         | 0 | 0 |
| Crocino bacterium jeju              | 0 | 0 |
| Clostridium aminobutyricum          | 0 | 0 |
| unknown_Species_of_Mogibacterium    | 0 | 0 |
| unknown_Species_of_Alkalibacter     | 0 | 0 |
| unknown_Genus_of_Cohaesibacteraceae | 0 | 0 |
| Devosia insulae                     | 0 | 0 |
| Nitratireductor basaltis            | 0 | 0 |
| Phyllobacterium brassicacearum      | 0 | 0 |
| Neorhizobium galegae                | 0 | 0 |
| Rhodoligotrophos appendicifer       | 0 | 0 |
| Xanthobacter tagetidis              | 0 | 0 |
| ambiguous_Species_of_Hyphomonas     | 0 | 0 |
| unknown_Species_of_Amaricoccus      | 0 | 0 |
| Roseomonas sp.                      | 0 | 0 |
| ambiguous_Species_of_Rickettsia     | 0 | 0 |
| Candidimonas nitroreducens          | 0 | 0 |
| unknown_Species_of_Pandora          | 0 | 0 |
| Inhella inkyongensis                | 0 | 0 |
| Methylophilus flavus                | 0 | 0 |
| unknown_Species_of_Nitrosomonas     | 0 | 0 |
| unknown_Species_of_Denitratisoma    | 0 | 0 |
| Thauera aminoaromatica              | 0 | 0 |
| Uliginosibacterium gangwonense      | 0 | 0 |
| unknown_Species_of_Nannocystis      | 0 | 0 |
| Rheinheimera soli                   | 0 | 0 |
| Enterobacter nimipressuralis        | 0 | 0 |
| Erwinia toletana                    | 0 | 0 |
| Salmonella enterica                 | 0 | 0 |

|                                         |   |    |
|-----------------------------------------|---|----|
| <i>Serratia marcescens</i>              | 0 | 0  |
| <i>Methylobacter marinus</i>            | 0 | 0  |
| unknown_Species_of_Methylomicrobium     | 0 | 0  |
| <i>Perlucidibaca piscinae</i>           | 0 | 0  |
| <i>Pseudomonas composti</i>             | 0 | 0  |
| <i>Pseudomonas cuatrocieneegasensis</i> | 0 | 0  |
| ambiguous_Species_of_Vibrio             | 0 | 0  |
| unknown_Species_of_Alkalimonas          | 0 | 0  |
| unknown_Species_of_Pyramidobacter       | 0 | 0  |
| <i>Tetrasphaera</i> sp.                 | 0 | 0  |
| <i>Microbacterium terricola</i>         | 0 | 11 |
| <i>Murinocardiopsis flavida</i>         | 0 | 0  |
| <i>Nocardiopsis metallicus</i>          | 0 | 0  |
| <i>Promicromonospora citrea</i>         | 0 | 0  |
| <i>Promicromonospora</i> sp.            | 0 | 0  |
| <i>Streptomyces sannurensis</i>         | 0 | 0  |
| <i>Dyadobacter hamtensis</i>            | 0 | 0  |
| <i>Sarcina maxima</i>                   | 0 | 0  |
| <i>Rhizobium pusense</i>                | 0 | 0  |
| ambiguous_Species_of_Porphyrabacter     | 0 | 0  |
| <i>Hydrogenophaga taeniospiralis</i>    | 0 | 0  |
| unknown_Species_of_Eionea               | 0 | 0  |
| unknown_Species_of_Methylobacter        | 0 | 0  |
| unknown_Species_of_Methylosarcina       | 0 | 0  |
| <i>Duganella radialis</i>               | 0 | 0  |
| <i>Duganella</i> sp.                    | 0 | 0  |
| <i>Massilia plicata</i>                 | 0 | 0  |
| <i>Massilia varians</i>                 | 0 | 0  |
| <i>Rugamonas rubra</i>                  | 0 | 0  |
| unknown_Species_of_Serinibacter         | 0 | 0  |
| <i>Brevibacterium iodinum</i>           | 0 | 0  |
| unknown_Species_of_Curtobacterium       | 0 | 0  |
| ambiguous_Species_of_Herbiconiux        | 0 | 0  |
| unknown_Species_of_Labedella            | 0 | 0  |
| <i>Labedella</i> sp.                    | 0 | 0  |
| ambiguous_Species_of_Leifsonia          | 0 | 0  |
| <i>Microbacterium imperiale</i>         | 0 | 0  |
| <i>Microbacterium luticocti</i>         | 0 | 0  |
| <i>Microbacterium oleivorans</i>        | 0 | 0  |
| <i>Microbacterium radiodurans</i>       | 0 | 0  |
| ambiguous_Species_of_Mycetocola         | 0 | 0  |
| ambiguous_Species_of_Plantibacter       | 0 | 0  |
| <i>Salinibacterium xinjiangense</i>     | 0 | 0  |
| unknown_Species_of_Catelliglobospora    | 0 | 0  |
| <i>Mycobacterium smegmatis</i>          | 0 | 0  |
| <i>Mycobacterium</i> sp.                | 0 | 0  |

|                                      |   |    |
|--------------------------------------|---|----|
| Mycobacterium vaccae                 | 0 | 0  |
| Nocardioides albertanoniae           | 0 | 0  |
| unknown_Species_of_Amycolatopsis     | 0 | 0  |
| ambiguous_Species_of_Amycolatopsis   | 0 | 0  |
| Pseudonocardia adelaidensis          | 0 | 0  |
| Pseudonocardia eucalypti             | 0 | 0  |
| Pseudonocardia parietis              | 0 | 0  |
| Streptomyces aurantiacus             | 0 | 0  |
| Dyadobacter alkalitolerans           | 0 | 0  |
| ambiguous_Species_of_Elizabethkingia | 0 | 0  |
| Epilithonimonas sp.                  | 0 | 0  |
| Flavobacterium caeni                 | 0 | 0  |
| Flavobacterium hauense               | 0 | 0  |
| Mucilaginibacter litoreus            | 0 | 0  |
| Mucilaginibacter rigui               | 0 | 0  |
| unknown_Species_of_Olivibacter       | 0 | 0  |
| ambiguous_Species_of_Parapedobacter  | 0 | 0  |
| Pedobacter cryoconitis               | 0 | 0  |
| Pedobacter heparinus                 | 0 | 0  |
| Pedobacter himalayensis              | 0 | 0  |
| Pedobacter koreensis                 | 0 | 0  |
| Pedobacter kwangyangensis            | 0 | 0  |
| Pedobacter piscium                   | 0 | 0  |
| Pedobacter westerhofensis            | 0 | 0  |
| Bacillus murimartini                 | 0 | 0  |
| Bacillus plakortidis                 | 0 | 0  |
| Lysinibacillus massiliensis          | 0 | 0  |
| Oceanobacillus pacificus             | 0 | 0  |
| unknown_Species_of_Ureibacillus      | 0 | 0  |
| Weissella viridescens                | 0 | 0  |
| unknown_Genus_of_Planctomycetaceae   | 0 | 0  |
| Methylopila henanense                | 0 | 0  |
| Phyllobacterium catacumbae           | 0 | 0  |
| unknown_Species_of_Agrobacterium     | 0 | 0  |
| unknown_Species_of_Neorhizobium      | 0 | 0  |
| Neorhizobium huautlense              | 0 | 0  |
| Rhizobium cellulosilyticum           | 0 | 0  |
| Roseomonas cervicalis                | 0 | 0  |
| Novosphingobium resinovorum          | 0 | 0  |
| Sphingomonas wittichii               | 0 | 11 |
| Achromobacter xylosoxidans           | 0 | 0  |
| Azohydromonas lata                   | 0 | 0  |
| Pigmentiphaga litoralis              | 0 | 0  |
| Acidovorax wohlfahrtii               | 0 | 16 |
| ambiguous_Species_of_Caldimonas      | 0 | 0  |
| Massilia yuzhufengensis              | 0 | 0  |

|                                        |   |     |
|----------------------------------------|---|-----|
| unknown_Species_of_Oxalicibacterium    | 0 | 0   |
| unknown_Species_of_CandidatusNitrotoga | 0 | 0   |
| unknown_Genus_of_Nannocystaceae        | 0 | 0   |
| Arsenophonus endosymbiont              | 0 | 0   |
| Enterobacter pulveris                  | 0 | 0   |
| ambiguous_Species_of_Gibbsiella        | 0 | 0   |
| unknown_Species_of_Plesiomonas         | 0 | 0   |
| Legionella massiliensis                | 0 | 0   |
| Amphritea sp.                          | 0 | 0   |
| unknown_Species_of_Enhydrobacter       | 0 | 0   |
| Pseudomonas extremorientalis           | 0 | 0   |
| unknown_Species_of_Dyella              | 0 | 0   |
| Pseudoxanthomonas mexicana             | 0 | 0   |
| Microbacterium arborescens             | 0 | 17  |
| Aureimonas ureilytica                  | 0 | 27  |
| Methylobacterium haplocladii           | 0 | 12  |
| Rhizobium larrymoorei                  | 0 | 17  |
| Sphingomonas fennica                   | 0 | 10  |
| Sphingomonas parapaucimobilis          | 0 | 221 |
| Sphingomonas phyllosphaerae            | 0 | 12  |
| Sphingomonas sanguinis                 | 0 | 34  |
| unknown_Species_of_Lautropia           | 0 | 10  |
| Acidovorax delafieldii                 | 0 | 12  |
| ambiguous_Species_of_Polaromonas       | 0 | 49  |
| Polaromonas aquatica                   | 0 | 20  |
| Oxalicibacterium solurbis              | 0 | 32  |
| Pantoea septica                        | 0 | 11  |
| Acinetobacter baylyi                   | 0 | 10  |
| Leucobacter aerolatus                  | 0 | 0   |
| Microbacterium binotii                 | 0 | 0   |
| Arthrobacter psychrolactophilus        | 0 | 0   |
| Gelidibacter gilvus                    | 0 | 0   |
| unknown_Species_of_Planococcus         | 0 | 0   |
| Sporosarcina soli                      | 0 | 0   |
| unknown_Species_of_Cucumibacter        | 0 | 0   |
| unknown_Species_of_Palleronia          | 0 | 0   |
| Herminiimonas arsenicoxydans           | 0 | 0   |
| Arthrobacter citreus                   | 0 | 0   |
| Promicromonospora aerolata             | 0 | 0   |
| Bacillus psychrosaccharolyticus        | 0 | 0   |
| Enterobacter asburiae                  | 0 | 0   |
| unknown_Genus_of_Cryptosporangiaceae   | 0 | 0   |
| ambiguous_Species_of_Agreia            | 0 | 0   |
| Saccharomonospora sp.                  | 0 | 0   |
| unknown_Genus_of_Prochlorococcaceae    | 0 | 0   |
| Amaricoccus macauensis                 | 0 | 0   |

|                                                         |   |   |
|---------------------------------------------------------|---|---|
| Rubellimicrobium aerolatum                              | 0 | 0 |
| Acidovorax radialis                                     | 0 | 0 |
| unknown_Genus_of_Desulfurellaceae                       | 0 | 0 |
| Cystobacter ferrugineus                                 | 0 | 0 |
| ambiguous_Genus_of_Polyangiaceae                        | 0 | 0 |
| ambiguous_Species_of_Xanthomonas                        | 0 | 0 |
| Janibacter anophelis                                    | 0 | 0 |
| Microbacterium lacus                                    | 0 | 0 |
| Tessaracoccus flavescens                                | 0 | 0 |
| unknown_Genus_of_Sanguibacteraceae                      | 0 | 0 |
| Sanguibacter antarcticus                                | 0 | 0 |
| unknown_Species_of_Sporichthya                          | 0 | 0 |
| ambiguous_Species_of_Sporichthya                        | 0 | 0 |
| Flavobacterium noncentrifugens                          | 0 | 0 |
| unknown_Species_of_Haloanella                           | 0 | 0 |
| unknown_Genus_of_Parachlamydiaceae                      | 0 | 0 |
| unknown_Genus_of_Chlorobiaceae                          | 0 | 0 |
| ambiguous_Genus_of_ClostridialesFamilyXIX.IncertaeSedis | 0 | 0 |
| unknown_Species_of_Fusobacterium                        | 0 | 0 |
| Phenylobacterium haematophilum                          | 0 | 0 |
| ambiguous_Species_of_Bartonella                         | 0 | 0 |
| ambiguous_Species_of_Beijerinckia                       | 0 | 0 |
| unknown_Species_of_Bosea                                | 0 | 0 |
| Aminobacter sp.                                         | 0 | 0 |
| unknown_Species_of_Phylobacterium                       | 0 | 0 |
| Agrobacterium vitis                                     | 0 | 0 |
| ambiguous_Species_of_Vasilyevaea                        | 0 | 0 |
| Erythrobacter litoralis                                 | 0 | 0 |
| Novosphingobium hassiacum                               | 0 | 0 |
| Bilophila wadsworthia                                   | 0 | 0 |
| unknown_Species_of_Cystobacter                          | 0 | 0 |
| Pseudomonas tuomuerensis                                | 0 | 0 |
| Lysobacter spongiicola                                  | 0 | 0 |
| unknown_Species_of_Luteolibacter                        | 0 | 0 |
| unknown_Genus_of_Brevibacteriaceae                      | 0 | 0 |
| Microbacterium arthrosphaerae                           | 0 | 0 |
| Microbacterium halotolerans                             | 0 | 0 |
| Isoptericola sp.                                        | 0 | 0 |
| Parapedobacter luteus                                   | 0 | 0 |
| Parapedobacter soli                                     | 0 | 0 |
| Sphingopyxis marina                                     | 0 | 0 |
| ambiguous_Species_of_Thiobacillus                       | 0 | 0 |
| ambiguous_Species_of_Pseudoalteromonas                  | 0 | 0 |
| Pseudoalteromonas agarivorans                           | 0 | 0 |
| Marinomonas arctica                                     | 0 | 0 |
| Clostridium chartatabidum                               | 0 | 0 |

|                                            |   |   |
|--------------------------------------------|---|---|
| unknown_Genus_of_Jiangellaceae             | 0 | 0 |
| Jiangella alba                             | 0 | 0 |
| Pseudokineococcus lusitanus                | 0 | 0 |
| Nocardiopsis alkaliphila                   | 0 | 0 |
| Lentzea albida                             | 0 | 0 |
| Pseudonocardia rhizophila                  | 0 | 0 |
| Streptomyces yanglinensis                  | 0 | 0 |
| Petrimonas sulfuriphila                    | 0 | 0 |
| Hymenobacter norwichensis                  | 0 | 0 |
| Tumebacillus flagellatus                   | 0 | 0 |
| ambiguous_Genus_of_Bacillalesincertaesedis | 0 | 0 |
| unknown_Species_of_Planifilum              | 0 | 0 |
| ambiguous_Species_of_Planifilum            | 0 | 0 |
| Planifilum fimeticola                      | 0 | 0 |
| Planifilum sp.                             | 0 | 0 |
| Planifilum yunnanense                      | 0 | 0 |
| Streptococcus intermedius                  | 0 | 0 |
| unknown_Species_of_Pirellula               | 0 | 0 |
| Mycoplana ramosa                           | 0 | 0 |
| ambiguous_Genus_of_Cohaesibacteraceae      | 0 | 0 |
| Rhizobium subbaraonis                      | 0 | 0 |
| Roseomonas ludipueritiae                   | 0 | 0 |
| Altererythrobacter xinjiangensis           | 0 | 0 |
| Croceicoccus marinus                       | 0 | 0 |
| Erythrobacter seohaensis                   | 0 | 0 |
| unknown_Species_of_Sandaracinobacter       | 0 | 0 |
| Sphingomonas mali                          | 0 | 0 |
| Eoetvoesia caeni                           | 0 | 0 |
| unknown_Species_of_Brachymonas             | 0 | 0 |
| Comamonas odontotermis                     | 0 | 0 |
| Hydrogenophaga palleronii                  | 0 | 0 |
| ambiguous_Species_of_Pelomonas             | 0 | 0 |
| Massilia alkalitolerans                    | 0 | 0 |
| Massilia niastensis                        | 0 | 0 |
| Thiobacillus thioparus                     | 0 | 0 |
| Azovibrio restrictus                       | 0 | 0 |
| ambiguous_Genus_of_Cystobacteraceae        | 0 | 0 |
| Archangium gephyra                         | 0 | 0 |
| Methylobacter luteus                       | 0 | 0 |
| Georgenia daeguensis                       | 0 | 0 |
| unknown_Species_of_Demetria                | 0 | 0 |
| Frondihabitans cladoniiphilus              | 0 | 0 |
| unknown_Species_of_Salinibacterium         | 0 | 0 |
| Arthrobacter psychrochitiniphilus          | 0 | 0 |
| Citricoccus sp.                            | 0 | 0 |
| Citricoccus zhacaiensis                    | 0 | 0 |

|                                                        |   |   |
|--------------------------------------------------------|---|---|
| unknown_Species_of_Kocuria                             | 0 | 0 |
| Kocuria atrinae                                        | 0 | 0 |
| Streptomyces thermoatroviridis                         | 0 | 0 |
| Flavobacterium antarcticum                             | 0 | 0 |
| Gelidibacter algens                                    | 0 | 0 |
| Arcticibacter svalbardensis                            | 0 | 0 |
| unknown_Species_of_Planomicrobium                      | 0 | 0 |
| Enterococcus alcedinis                                 | 0 | 0 |
| Clostridium sardiniense                                | 0 | 0 |
| Bosea genosp.                                          | 0 | 0 |
| Mycoplana dimorpha                                     | 0 | 0 |
| Jannaschia donghaensis                                 | 0 | 0 |
| Jannaschia pohangensis                                 | 0 | 0 |
| Roseovarius nanhaiticus                                | 0 | 0 |
| Sphingobium subterraneum                               | 0 | 0 |
| Simplicispira psychrophila                             | 0 | 0 |
| Variovorax ginsengisoli                                | 0 | 0 |
| Thauera chlorobenzoica                                 | 0 | 0 |
| unknown_Species_of_Escherichia                         | 0 | 0 |
| Cellulomonas oligotrophica                             | 0 | 0 |
| unknown_Species_of_Oerskovia                           | 0 | 0 |
| Leifsonia lichenia                                     | 0 | 0 |
| unknown_Species_of_Ruania                              | 0 | 0 |
| unknown_Species_of_Algebacter                          | 0 | 0 |
| unknown_Genus_of_Anaerolineaceae                       | 0 | 0 |
| unknown_Genus_of_Thermosporotrichaceae                 | 0 | 0 |
| unknown_Genus_of_Trueperaceae                          | 0 | 0 |
| unknown_Genus_of_Pasteuriaceae                         | 0 | 0 |
| unknown_Genus_of_ClostridialesFamilyXVII.IncertaeSedis | 0 | 0 |
| unknown_Genus_of_Heliobacteriaceae                     | 0 | 0 |
| unknown_Genus_of_Thermoanaerobacteraceae               | 0 | 0 |
| unknown_Genus_of_Phycisphaeraceae                      | 0 | 0 |
| Brevundimonas abyssalis                                | 0 | 0 |
| unknown_Genus_of_Bartonellaceae                        | 0 | 0 |
| unknown_Genus_of_Brucellaceae                          | 0 | 0 |
| Devosia ginsengisoli                                   | 0 | 0 |
| Hyphomicrobium zavarzinii                              | 0 | 0 |
| Mesorhizobium ciceri                                   | 0 | 0 |
| unknown_Species_of_Nitratireductor                     | 0 | 0 |
| Kaistia granuli                                        | 0 | 0 |
| Rhizobium etli                                         | 0 | 0 |
| ambiguous_Species_of_Shinella                          | 0 | 0 |
| ambiguous_Species_of_Sinorhizobium                     | 0 | 0 |
| Parvibaculum lavamentivorans                           | 0 | 0 |
| Rhizobium halophytocola                                | 0 | 0 |
| Ketogulonicigenium vulgare                             | 0 | 0 |



|                                         |   |   |
|-----------------------------------------|---|---|
| Paracoccus denitrificans                | 0 | 0 |
| unknown_Genus_of_Sneathiellaceae        | 0 | 0 |
| ambiguous_Species_of_Altererythrobacter | 0 | 0 |
| ambiguous_Species_of_Castellaniella     | 0 | 0 |
| Castellaniella caeni                    | 0 | 0 |
| Brachymonas denitrificans               | 0 | 0 |
| Comamonas denitrificans                 | 0 | 0 |
| unknown_Genus_of_Methylophilaceae       | 0 | 0 |
| unknown_Species_of_Bacteriovorax        | 0 | 0 |
| Bacteriovorax stolpii                   | 0 | 0 |
| unknown_Genus_of_Desulfohalobiaceae     | 0 | 0 |
| ambiguous_Species_of_Cystobacter        | 0 | 0 |
| Melittangium lichenicola                | 0 | 0 |
| Nannocystis exedens                     | 0 | 0 |
| unknown_Genus_of_Granulosicoccaceae     | 0 | 0 |
| ambiguous_Genus_of_Halothiobacillaceae  | 0 | 0 |
| Legionella sp.                          | 0 | 0 |
| unknown_Species_of_Kangiella            | 0 | 0 |
| Pseudomonas alcaligenes                 | 0 | 0 |
| unknown_Genus_of_Salinisphaeraceae      | 0 | 0 |
| Dokdonella sp.                          | 0 | 0 |
| unknown_Species_of_Acholeplasma         | 0 | 0 |
| Acholeplasma granularum                 | 0 | 0 |
| Acholeplasma sp.                        | 0 | 0 |
| Opitutus sp.                            | 0 | 0 |
| Arthrobacter sulfureus                  | 0 | 0 |
| Streptomyces nanshensis                 | 0 | 0 |
| Formosa sp.                             | 0 | 0 |
| Kinneretia asaccharophila               | 0 | 0 |
| ambiguous_Species_of_Bdellovibrio       | 0 | 0 |
| Bdellovibrio sp.                        | 0 | 0 |
| unknown_Species_of_Psychrobacter        | 0 | 0 |
| Streptomyces ipomoeae                   | 0 | 0 |
| ambiguous_Species_of_Williamsia         | 0 | 0 |
| Wautersiella falsenii                   | 0 | 0 |
| Shimazuella sp.                         | 0 | 0 |
| unknown_Species_of_Abiotrophia          | 0 | 0 |
| Ochrobactrum gallinifacis               | 0 | 0 |
| ambiguous_Species_of_Paenochrobactrum   | 0 | 0 |
| Pseudochrobactrum kiredjaniae           | 0 | 0 |
| unknown_Species_of_Donghicola           | 0 | 0 |
| unknown_Species_of_Alcaligenes          | 0 | 0 |
| ambiguous_Species_of_Bordetella         | 0 | 0 |
| Paenalcaligenes sp.                     | 0 | 0 |
| ambiguous_Genus_of_Aeromonadaceae       | 0 | 0 |
| unknown_Species_of_Zobellella           | 0 | 0 |

|                                       |   |   |
|---------------------------------------|---|---|
| Raoultella terrigena                  | 0 | 0 |
| Methylophaga frappieri                | 0 | 0 |
| ambiguous_Species_of_Ignatzschineria  | 0 | 0 |
| Ignatzschineria sp.                   | 0 | 0 |
| Salinibacterium sp.                   | 0 | 0 |
| unknown_Species_of_Micropruina        | 0 | 0 |
| Clostridium sartagoforme              | 0 | 0 |
| Clostridium litorale                  | 0 | 0 |
| Microvirga guangxiensis               | 0 | 0 |
| ambiguous_Genus_of_Rhodospirillaceae  | 0 | 0 |
| Sulfurimonas denitrificans            | 0 | 0 |
| Escherichia coli                      | 0 | 0 |
| unknown_Species_of_Edaphobacter       | 0 | 0 |
| Edaphobacter modestum                 | 0 | 0 |
| Edaphobacter modestus                 | 0 | 0 |
| Nocardia sp.                          | 0 | 0 |
| Streptomyces albiflaviniger           | 0 | 0 |
| Pedobacter borealis                   | 0 | 0 |
| ambiguous_Species_of_Hydrogenophaga   | 0 | 0 |
| ambiguous_Genus_of_Nitrosomonadaceae  | 0 | 0 |
| Flavobacterium johnsoniae             | 0 | 0 |
| Caulobacter mirabilis                 | 0 | 0 |
| Corynebacterium accolens              | 0 | 0 |
| Kineococcus aurantiacus               | 0 | 0 |
| Flavobacterium aquidurens             | 0 | 0 |
| unknown_Species_of_Flavisolibacter    | 0 | 0 |
| unknown_Species_of_Phormidium         | 0 | 0 |
| Carnobacterium inhibens               | 0 | 0 |
| Methylobacterium variabile            | 0 | 0 |
| Rubellimicrobium roseum               | 0 | 0 |
| unknown_Genus_of_Anaplasmataceae      | 0 | 0 |
| Tepidimonas fonticaldi                | 0 | 0 |
| Aeromicrobium flavum                  | 0 | 0 |
| Amycolatopsis sp.                     | 0 | 0 |
| Thermocrisum municipale               | 0 | 0 |
| Hymenobacter xinjiangensis            | 0 | 0 |
| Sphingobacterium faecium              | 0 | 0 |
| ambiguous_Species_of_Brevibacillus    | 0 | 0 |
| unknown_Species_of_Polycladomyces     | 0 | 0 |
| Polycladomyces abyssicola             | 0 | 0 |
| Agaricola taiwanensis                 | 0 | 0 |
| Roseomonas riguiloci                  | 0 | 0 |
| unknown_Species_of_Kaistobacter       | 0 | 0 |
| unknown_Species_of_Uliginosibacterium | 0 | 0 |
| ambiguous_Species_of_Kluyvera         | 0 | 0 |
| Olivibacter oleidegradans             | 0 | 0 |

|                                        |   |   |
|----------------------------------------|---|---|
| unknown_Species_of_Oxalobacter         | 0 | 0 |
| Enterobacter ludwigii                  | 0 | 0 |
| Corynebacterium xerosis                | 0 | 0 |
| Prevotella melaninogenica              | 0 | 0 |
| unknown_Species_of_Pleomorphomonas     | 0 | 0 |
| Phyllobacterium myrsinacearum          | 0 | 0 |
| unknown_Species_of_Kaistia             | 0 | 0 |
| Pseudorhodobacter aquimaris            | 0 | 0 |
| ambiguous_Species_of_Phaeospirillum    | 0 | 0 |
| Pusillimonas ginsengisoli              | 0 | 0 |
| Nitrosomonas sp.                       | 0 | 0 |
| unknown_Species_of_Solimonas           | 0 | 0 |
| Leucobacter komagatae                  | 0 | 0 |
| unknown_Species_of_Pseudoclavibacter   | 0 | 0 |
| Arthrobacter gangotriensis             | 0 | 0 |
| Arthrobacter rhombi                    | 0 | 0 |
| unknown_Species_of_Micromonospora      | 0 | 0 |
| Micromonospora sp.                     | 0 | 0 |
| Pseudonocardia tropica                 | 0 | 0 |
| Streptomyces haliclona                 | 0 | 0 |
| Streptomyces marinus                   | 0 | 0 |
| ambiguous_Species_of_Algoriphagus      | 0 | 0 |
| Algoriphagus hitonicola                | 0 | 0 |
| unknown_Species_of_Bergeyella          | 0 | 0 |
| Planomicrobium alkanoclasticum         | 0 | 0 |
| unknown_Species_of_Martelella          | 0 | 0 |
| unknown_Species_of_Bartonella          | 0 | 0 |
| Campylobacter gracilis                 | 0 | 0 |
| Escherichia/Shigella coli/dysenteriae  | 0 | 0 |
| ambiguous_Species_of_Rickettsiella     | 0 | 0 |
| Pseudomonas denitrificans              | 0 | 0 |
| Luteimonas huabeiensis                 | 0 | 0 |
| unknown_Genus_of_Alkalimonas           | 0 | 0 |
| Corynebacterium ulceribovis            | 0 | 0 |
| ambiguous_Species_of_Citricoccus       | 0 | 0 |
| unknown_Species_of_Marmoricola         | 0 | 0 |
| ambiguous_Species_of_Saccharomonospora | 0 | 0 |
| Bizionia sp.                           | 0 | 0 |
| Flavobacterium frigidum                | 0 | 0 |
| ambiguous_Species_of_Bhargavaea        | 0 | 0 |
| Bhargavaea beijingensis                | 0 | 0 |
| unknown_Species_of_Brevibacillus       | 0 | 0 |
| ambiguous_Species_of_Salinicoccus      | 0 | 0 |
| ambiguous_Species_of_Bradyrhizobium    | 0 | 0 |
| unknown_Species_of_Mycoplana           | 0 | 0 |
| Methylobacterium hispanicum            | 0 | 0 |

|                                     |   |   |
|-------------------------------------|---|---|
| unknown_Species_of_Thioclava        | 0 | 0 |
| unknown_Species_of_Methylothera     | 0 | 0 |
| ambiguous_Genus_of_Sulfuricellaceae | 0 | 0 |
| Aeromonas sharmata                  | 0 | 0 |
| Enterobacter oryzae                 | 0 | 0 |
| Rickettsiella symbiont              | 0 | 0 |
| Methylobacterium buryatense         | 0 | 0 |
| Nicoletella semolina                | 0 | 0 |
| Varibaculum cambriense              | 0 | 0 |
| Corynebacterium lipophiloflavum     | 0 | 0 |
| Blastococcus jejuensis              | 0 | 0 |
| Modestobacter marinus               | 0 | 0 |
| Marinactinospora thermotolerans     | 0 | 0 |
| unknown_Species_of_Spinactinospora  | 0 | 0 |
| Prevotella intermedia               | 0 | 0 |
| Paenibacillus barengoltzii          | 0 | 0 |
| Belnapia moabensis                  | 0 | 0 |
| ambiguous_Species_of_Ralstonia      | 0 | 0 |
| Aeromonas hydrophila                | 0 | 0 |
| Aeromonas media                     | 0 | 0 |
| Arthrobacter agilis                 | 0 | 0 |
| Streptomyces anulatus               | 0 | 0 |
| Luteibacter anthropi                | 0 | 0 |

| Cervical Star |        |        |        |        |        |        |
|---------------|--------|--------|--------|--------|--------|--------|
| CS_273        | CS_280 | CS_282 | CS_283 | CS_288 | CS_302 | CS_307 |
| 0             | 339    | 53     | 0      | 0      | 0      | 13     |
| 0             | 37     | 54     | 68     | 0      | 0      | 0      |
| 0             | 106    | 446    | 362    | 35     | 0      | 175    |
| 0             | 136    | 216    | 333    | 67     | 24     | 22     |
| 0             | 15     | 44     | 288    | 46     | 0      | 34     |
| 0             | 0      | 0      | 11     | 119    | 26     | 14     |
| 0             | 41     | 83     | 84     | 13     | 0      | 12     |
| 0             | 16     | 54     | 72     | 0      | 0      | 13     |
| 24            | 0      | 122    | 215    | 0      | 54     | 129    |
| 53            | 30     | 252    | 679    | 45     | 70     | 585    |
| 32            | 0      | 227    | 119    | 0      | 0      | 346    |
| 0             | 0      | 40     | 41     | 0      | 0      | 0      |
| 0             | 49     | 12     | 247    | 0      | 0      | 46     |
| 0             | 0      | 0      | 10     | 0      | 0      | 25     |
| 0             | 0      | 76     | 60     | 0      | 0      | 107    |
| 0             | 15     | 20     | 50     | 0      | 0      | 139    |
| 47            | 466    | 297    | 1793   | 70     | 685    | 609    |
| 0             | 0      | 0      | 0      | 0      | 0      | 503    |
| 0             | 75     | 17     | 107    | 0      | 41     | 0      |
| 0             | 437    | 117    | 76     | 0      | 12     | 52     |
| 0             | 458    | 0      | 417    | 0      | 0      | 0      |
| 0             | 100    | 29     | 22     | 0      | 0      | 14     |
| 0             | 130    | 11     | 37     | 23     | 0      | 16     |
| 0             | 0      | 0      | 0      | 0      | 0      | 0      |
| 390           | 141    | 508    | 1192   | 87     | 90     | 1952   |
| 92            | 50     | 213    | 195    | 0      | 103    | 643    |
| 25            | 127    | 158    | 242    | 0      | 61     | 200    |
| 61            | 26     | 80     | 156    | 0      | 41     | 175    |
| 140           | 91     | 211    | 265    | 0      | 108    | 509    |
| 16            | 21     | 47     | 108    | 0      | 0      | 146    |
| 25            | 14     | 11     | 90     | 0      | 0      | 336    |
| 17            | 0      | 0      | 89     | 0      | 0      | 48     |
| 418           | 579    | 648    | 1682   | 0      | 423    | 762    |
| 0             | 40     | 13     | 0      | 13     | 0      | 0      |
| 0             | 531    | 0      | 377    | 0      | 0      | 0      |
| 0             | 442    | 0      | 152    | 0      | 0      | 0      |
| 0             | 444    | 373    | 57     | 0      | 0      | 0      |
| 57            | 107    | 60     | 457    | 68     | 137    | 455    |
| 12            | 0      | 444    | 55     | 0      | 48     | 2203   |
| 701           | 1088   | 2231   | 4203   | 135    | 763    | 33318  |
| 0             | 166    | 28     | 177    | 0      | 77     | 131    |

|     |     |      |      |     |     |       |
|-----|-----|------|------|-----|-----|-------|
| 0   | 149 | 12   | 197  | 0   | 58  | 147   |
| 0   | 188 | 0    | 66   | 0   | 32  | 227   |
| 0   | 85  | 12   | 120  | 0   | 85  | 63    |
| 759 | 0   | 1317 | 3205 | 78  | 404 | 22702 |
| 0   | 17  | 0    | 27   | 11  | 0   | 219   |
| 15  | 21  | 217  | 422  | 0   | 0   | 464   |
| 11  | 0   | 132  | 261  | 0   | 0   | 401   |
| 51  | 0   | 821  | 812  | 0   | 0   | 275   |
| 11  | 0   | 175  | 43   | 0   | 0   | 293   |
| 50  | 0   | 475  | 289  | 0   | 0   | 58    |
| 0   | 0   | 0    | 0    | 0   | 0   | 0     |
| 0   | 0   | 160  | 93   | 0   | 0   | 372   |
| 98  | 0   | 1169 | 681  | 0   | 30  | 953   |
| 0   | 0   | 268  | 132  | 0   | 0   | 19    |
| 0   | 0   | 214  | 72   | 0   | 0   | 50    |
| 42  | 0   | 893  | 1100 | 0   | 12  | 74    |
| 0   | 0   | 89   | 39   | 0   | 0   | 675   |
| 185 | 451 | 1785 | 1515 | 25  | 281 | 5876  |
| 23  | 0   | 352  | 193  | 0   | 12  | 2875  |
| 0   | 37  | 143  | 154  | 0   | 32  | 10    |
| 0   | 0   | 99   | 40   | 0   | 0   | 759   |
| 0   | 0   | 57   | 44   | 0   | 0   | 28    |
| 0   | 0   | 0    | 0    | 0   | 0   | 0     |
| 0   | 0   | 68   | 40   | 0   | 0   | 57    |
| 0   | 0   | 0    | 0    | 0   | 0   | 112   |
| 11  | 0   | 139  | 124  | 0   | 0   | 341   |
| 0   | 0   | 154  | 70   | 0   | 0   | 470   |
| 10  | 0   | 67   | 48   | 0   | 0   | 20    |
| 0   | 0   | 10   | 12   | 0   | 0   | 106   |
| 0   | 0   | 33   | 116  | 0   | 10  | 38    |
| 136 | 0   | 1911 | 2659 | 0   | 52  | 3146  |
| 292 | 134 | 3054 | 5174 | 377 | 332 | 4063  |
| 13  | 0   | 31   | 76   | 16  | 28  | 32    |
| 0   | 0   | 23   | 77   | 0   | 0   | 163   |
| 0   | 0   | 201  | 274  | 0   | 0   | 53    |
| 0   | 0   | 280  | 403  | 0   | 0   | 153   |
| 0   | 0   | 78   | 126  | 0   | 0   | 167   |
| 0   | 0   | 220  | 146  | 0   | 10  | 174   |
| 0   | 0   | 21   | 25   | 0   | 0   | 67    |
| 14  | 0   | 103  | 78   | 0   | 0   | 437   |
| 89  | 0   | 1088 | 811  | 0   | 0   | 4477  |
| 0   | 0   | 53   | 83   | 75  | 24  | 0     |
| 0   | 0   | 24   | 59   | 0   | 0   | 71    |
| 0   | 0   | 10   | 25   | 0   | 0   | 74    |
| 96  | 0   | 1285 | 1228 | 0   | 92  | 1143  |
| 586 | 39  | 5461 | 7179 | 119 | 286 | 11688 |

|      |      |      |      |     |      |      |
|------|------|------|------|-----|------|------|
| 0    | 0    | 83   | 77   | 0   | 0    | 454  |
| 28   | 0    | 174  | 110  | 280 | 130  | 659  |
| 12   | 0    | 611  | 992  | 0   | 0    | 197  |
| 0    | 0    | 172  | 131  | 0   | 0    | 791  |
| 492  | 10   | 4265 | 9091 | 65  | 155  | 3221 |
| 59   | 0    | 35   | 166  | 20  | 10   | 0    |
| 0    | 10   | 24   | 0    | 0   | 0    | 0    |
| 0    | 18   | 101  | 95   | 0   | 0    | 0    |
| 0    | 0    | 33   | 64   | 0   | 0    | 0    |
| 0    | 28   | 52   | 10   | 0   | 12   | 0    |
| 0    | 0    | 52   | 98   | 38  | 0    | 21   |
| 0    | 0    | 65   | 59   | 0   | 32   | 49   |
| 1296 | 1656 | 2359 | 6913 | 731 | 1874 | 3009 |
| 0    | 0    | 0    | 13   | 0   | 10   | 0    |
| 307  | 63   | 851  | 2064 | 172 | 395  | 527  |
| 0    | 0    | 93   | 161  | 0   | 0    | 247  |
| 0    | 0    | 0    | 38   | 0   | 0    | 0    |
| 52   | 0    | 565  | 460  | 0   | 29   | 262  |
| 22   | 0    | 10   | 214  | 0   | 24   | 0    |
| 0    | 0    | 57   | 105  | 0   | 0    | 129  |
| 0    | 0    | 0    | 23   | 0   | 0    | 11   |
| 0    | 0    | 26   | 30   | 0   | 0    | 39   |
| 0    | 0    | 0    | 30   | 0   | 0    | 0    |
| 45   | 129  | 86   | 240  | 0   | 146  | 43   |
| 159  | 290  | 417  | 567  | 0   | 257  | 105  |
| 92   | 106  | 160  | 400  | 10  | 208  | 113  |
| 33   | 64   | 48   | 224  | 0   | 50   | 53   |
| 0    | 12   | 0    | 0    | 0   | 0    | 121  |
| 20   | 165  | 223  | 248  | 0   | 0    | 156  |
| 390  | 217  | 1111 | 1975 | 61  | 446  | 653  |
| 0    | 104  | 0    | 42   | 0   | 0    | 78   |
| 12   | 0    | 32   | 26   | 0   | 30   | 0    |
| 0    | 0    | 0    | 47   | 0   | 0    | 27   |
| 0    | 0    | 40   | 117  | 0   | 37   | 43   |
| 0    | 0    | 83   | 65   | 0   | 0    | 35   |
| 0    | 0    | 0    | 61   | 0   | 0    | 0    |
| 60   | 26   | 79   | 176  | 0   | 29   | 0    |
| 74   | 41   | 42   | 297  | 0   | 118  | 12   |
| 0    | 0    | 53   | 132  | 0   | 21   | 102  |
| 155  | 178  | 152  | 917  | 21  | 321  | 272  |
| 11   | 0    | 10   | 89   | 0   | 31   | 26   |
| 0    | 0    | 12   | 80   | 0   | 10   | 0    |
| 34   | 0    | 338  | 368  | 0   | 116  | 486  |
| 695  | 336  | 1866 | 3408 | 412 | 640  | 5780 |
| 12   | 0    | 23   | 22   | 0   | 27   | 219  |
| 242  | 211  | 90   | 244  | 0   | 472  | 1359 |

|     |     |      |      |     |     |      |
|-----|-----|------|------|-----|-----|------|
| 0   | 23  | 0    | 256  | 0   | 0   | 0    |
| 44  | 12  | 0    | 310  | 14  | 0   | 32   |
| 267 | 21  | 29   | 477  | 38  | 62  | 151  |
| 638 | 13  | 1572 | 1662 | 35  | 743 | 9011 |
| 13  | 0   | 77   | 51   | 0   | 29  | 601  |
| 62  | 0   | 63   | 135  | 18  | 395 | 1029 |
| 0   | 0   | 0    | 0    | 0   | 0   | 0    |
| 0   | 0   | 62   | 28   | 0   | 240 | 509  |
| 0   | 0   | 56   | 44   | 0   | 0   | 68   |
| 0   | 0   | 0    | 0    | 0   | 0   | 0    |
| 26  | 0   | 275  | 129  | 0   | 58  | 237  |
| 10  | 456 | 28   | 298  | 43  | 0   | 24   |
| 0   | 0   | 205  | 99   | 0   | 0   | 320  |
| 82  | 25  | 0    | 87   | 0   | 11  | 25   |
| 214 | 122 | 0    | 358  | 0   | 30  | 121  |
| 0   | 0   | 183  | 81   | 0   | 0   | 163  |
| 0   | 0   | 52   | 127  | 0   | 0   | 333  |
| 0   | 0   | 35   | 76   | 0   | 0   | 0    |
| 0   | 0   | 0    | 0    | 0   | 0   | 0    |
| 15  | 46  | 148  | 25   | 0   | 338 | 10   |
| 69  | 179 | 101  | 313  | 0   | 142 | 64   |
| 0   | 25  | 28   | 28   | 0   | 140 | 0    |
| 75  | 10  | 275  | 792  | 53  | 83  | 55   |
| 0   | 0   | 0    | 53   | 11  | 0   | 11   |
| 0   | 0   | 55   | 338  | 0   | 12  | 12   |
| 46  | 138 | 1057 | 1084 | 0   | 30  | 392  |
| 0   | 12  | 72   | 74   | 52  | 44  | 61   |
| 63  | 304 | 175  | 575  | 112 | 212 | 317  |
| 16  | 0   | 23   | 182  | 0   | 0   | 45   |
| 0   | 18  | 79   | 155  | 0   | 23  | 148  |
| 0   | 0   | 14   | 20   | 40  | 0   | 27   |
| 0   | 47  | 255  | 226  | 0   | 0   | 53   |
| 23  | 46  | 224  | 401  | 90  | 98  | 183  |
| 0   | 0   | 10   | 211  | 0   | 0   | 0    |
| 0   | 44  | 60   | 84   | 13  | 69  | 89   |
| 64  | 312 | 1470 | 1620 | 0   | 14  | 640  |
| 41  | 0   | 645  | 539  | 13  | 30  | 595  |
| 0   | 0   | 87   | 84   | 0   | 0   | 0    |
| 0   | 0   | 254  | 227  | 0   | 0   | 0    |
| 0   | 0   | 11   | 23   | 0   | 0   | 0    |
| 263 | 31  | 12   | 63   | 0   | 870 | 0    |
| 0   | 0   | 47   | 29   | 0   | 0   | 27   |
| 0   | 0   | 615  | 379  | 0   | 0   | 69   |
| 0   | 0   | 37   | 28   | 0   | 0   | 28   |
| 83  | 440 | 1967 | 1529 | 177 | 803 | 13   |
| 76  | 95  | 2793 | 68   | 132 | 74  | 15   |



|      |       |       |      |      |      |      |
|------|-------|-------|------|------|------|------|
| 135  | 118   | 5024  | 54   | 0    | 97   | 14   |
| 805  | 20    | 366   | 205  | 0    | 704  | 46   |
| 1389 | 195   | 15557 | 362  | 335  | 1546 | 365  |
| 389  | 896   | 733   | 268  | 1146 | 3166 | 106  |
| 0    | 0     | 43    | 104  | 0    | 0    | 51   |
| 77   | 81    | 985   | 422  | 34   | 73   | 268  |
| 161  | 109   | 422   | 751  | 132  | 121  | 302  |
| 0    | 22    | 0     | 47   | 0    | 0    | 0    |
| 0    | 0     | 0     | 36   | 0    | 0    | 91   |
| 0    | 0     | 40    | 29   | 0    | 0    | 0    |
| 0    | 0     | 63    | 81   | 0    | 0    | 141  |
| 0    | 0     | 54    | 32   | 0    | 0    | 10   |
| 0    | 0     | 252   | 120  | 0    | 0    | 0    |
| 131  | 145   | 613   | 431  | 283  | 207  | 544  |
| 0    | 0     | 0     | 22   | 0    | 0    | 21   |
| 273  | 0     | 2067  | 3096 | 23   | 42   | 309  |
| 0    | 0     | 0     | 12   | 0    | 0    | 12   |
| 0    | 0     | 0     | 11   | 0    | 0    | 0    |
| 0    | 0     | 0     | 12   | 0    | 0    | 0    |
| 0    | 177   | 26    | 11   | 0    | 0    | 0    |
| 0    | 20    | 50    | 245  | 0    | 0    | 0    |
| 381  | 922   | 0     | 317  | 0    | 221  | 364  |
| 0    | 256   | 586   | 77   | 0    | 0    | 1808 |
| 0    | 0     | 73    | 0    | 0    | 0    | 0    |
| 0    | 15    | 126   | 163  | 0    | 0    | 0    |
| 0    | 94    | 237   | 40   | 0    | 0    | 1309 |
| 34   | 2120  | 415   | 226  | 0    | 42   | 557  |
| 0    | 0     | 42    | 105  | 0    | 0    | 0    |
| 0    | 0     | 115   | 105  | 0    | 10   | 23   |
| 0    | 0     | 0     | 0    | 0    | 0    | 0    |
| 0    | 0     | 0     | 56   | 0    | 0    | 0    |
| 0    | 0     | 218   | 623  | 0    | 0    | 0    |
| 0    | 0     | 73    | 43   | 0    | 0    | 195  |
| 0    | 0     | 0     | 0    | 0    | 0    | 0    |
| 0    | 418   | 0     | 0    | 0    | 0    | 0    |
| 10   | 73    | 0     | 77   | 0    | 68   | 12   |
| 2016 | 11415 | 1840  | 7064 | 43   | 1999 | 3115 |
| 1198 | 2065  | 1225  | 2965 | 0    | 2051 | 2183 |
| 11   | 254   | 0     | 485  | 0    | 94   | 231  |
| 0    | 43    | 0     | 76   | 0    | 0    | 0    |
| 0    | 0     | 0     | 0    | 0    | 0    | 13   |
| 91   | 23    | 3977  | 3508 | 0    | 133  | 9558 |
| 58   | 66    | 443   | 394  | 12   | 252  | 438  |
| 23   | 37    | 0     | 223  | 0    | 45   | 14   |
| 0    | 0     | 149   | 132  | 0    | 0    | 135  |
| 110  | 0     | 1054  | 2142 | 0    | 55   | 1279 |

|      |      |      |      |    |      |      |
|------|------|------|------|----|------|------|
| 16   | 0    | 592  | 722  | 0  | 25   | 1540 |
| 267  | 0    | 2495 | 2359 | 0  | 0    | 2744 |
| 0    | 443  | 21   | 401  | 0  | 27   | 113  |
| 0    | 87   | 30   | 133  | 0  | 0    | 0    |
| 26   | 52   | 139  | 204  | 0  | 116  | 33   |
| 1054 | 846  | 1137 | 2589 | 0  | 1186 | 1258 |
| 41   | 0    | 184  | 1368 | 0  | 299  | 851  |
| 104  | 28   | 0    | 30   | 0  | 106  | 97   |
| 0    | 0    | 0    | 18   | 0  | 0    | 0    |
| 0    | 0    | 0    | 0    | 0  | 0    | 0    |
| 10   | 0    | 89   | 528  | 0  | 0    | 724  |
| 0    | 0    | 0    | 0    | 0  | 0    | 0    |
| 0    | 0    | 0    | 36   | 0  | 0    | 15   |
| 204  | 313  | 1151 | 891  | 0  | 381  | 456  |
| 0    | 0    | 0    | 39   | 0  | 35   | 0    |
| 0    | 0    | 0    | 112  | 0  | 0    | 0    |
| 0    | 0    | 29   | 212  | 0  | 0    | 0    |
| 0    | 0    | 139  | 393  | 0  | 0    | 434  |
| 96   | 104  | 72   | 217  | 0  | 171  | 469  |
| 0    | 82   | 0    | 78   | 0  | 0    | 0    |
| 0    | 23   | 41   | 215  | 0  | 0    | 0    |
| 0    | 173  | 0    | 351  | 0  | 0    | 0    |
| 95   | 167  | 43   | 66   | 0  | 207  | 15   |
| 0    | 1427 | 0    | 331  | 0  | 0    | 0    |
| 455  | 3678 | 344  | 1342 | 0  | 760  | 198  |
| 37   | 102  | 435  | 440  | 0  | 103  | 1082 |
| 0    | 0    | 42   | 30   | 0  | 0    | 67   |
| 188  | 24   | 2248 | 3240 | 0  | 213  | 3074 |
| 109  | 125  | 241  | 479  | 0  | 607  | 114  |
| 10   | 10   | 127  | 124  | 0  | 133  | 14   |
| 11   | 0    | 402  | 529  | 0  | 0    | 1288 |
| 49   | 11   | 20   | 368  | 0  | 68   | 17   |
| 0    | 0    | 35   | 27   | 0  | 0    | 16   |
| 11   | 11   | 175  | 101  | 0  | 24   | 35   |
| 66   | 144  | 665  | 420  | 0  | 282  | 661  |
| 0    | 0    | 192  | 106  | 0  | 60   | 85   |
| 36   | 0    | 294  | 97   | 0  | 115  | 153  |
| 0    | 0    | 60   | 39   | 0  | 35   | 0    |
| 0    | 0    | 58   | 0    | 0  | 0    | 0    |
| 29   | 63   | 507  | 768  | 0  | 94   | 215  |
| 55   | 221  | 1635 | 1039 | 0  | 32   | 105  |
| 14   | 14   | 578  | 369  | 30 | 29   | 513  |
| 0    | 0    | 59   | 42   | 0  | 0    | 107  |
| 720  | 129  | 1908 | 214  | 26 | 415  | 960  |
| 0    | 0    | 0    | 0    | 0  | 0    | 0    |
| 460  | 2611 | 1155 | 699  | 14 | 73   | 630  |

|      |     |      |      |     |      |      |
|------|-----|------|------|-----|------|------|
| 1567 | 173 | 385  | 1464 | 0   | 848  | 1788 |
| 0    | 0   | 11   | 66   | 0   | 0    | 12   |
| 53   | 30  | 13   | 172  | 0   | 38   | 0    |
| 129  | 0   | 0    | 154  | 0   | 42   | 1236 |
| 246  | 10  | 359  | 110  | 0   | 54   | 42   |
| 68   | 0   | 0    | 90   | 0   | 48   | 21   |
| 109  | 46  | 29   | 67   | 0   | 164  | 0    |
| 0    | 24  | 0    | 92   | 0   | 24   | 95   |
| 0    | 0   | 0    | 73   | 0   | 0    | 0    |
| 0    | 0   | 0    | 10   | 0   | 0    | 0    |
| 0    | 0   | 0    | 34   | 0   | 0    | 0    |
| 10   | 197 | 0    | 93   | 0   | 68   | 47   |
| 2349 | 404 | 545  | 1461 | 142 | 1845 | 8660 |
| 55   | 0   | 36   | 144  | 0   | 386  | 77   |
| 12   | 91  | 0    | 77   | 0   | 165  | 23   |
| 93   | 132 | 11   | 102  | 15  | 245  | 188  |
| 517  | 402 | 93   | 667  | 68  | 877  | 337  |
| 0    | 0   | 49   | 17   | 0   | 44   | 2104 |
| 0    | 0   | 0    | 12   | 0   | 46   | 701  |
| 0    | 0   | 67   | 103  | 0   | 113  | 2411 |
| 0    | 0   | 26   | 0    | 0   | 0    | 1753 |
| 16   | 46  | 0    | 75   | 0   | 10   | 220  |
| 82   | 30  | 31   | 282  | 0   | 55   | 947  |
| 11   | 11  | 0    | 56   | 0   | 0    | 412  |
| 0    | 12  | 0    | 20   | 0   | 28   | 410  |
| 107  | 0   | 31   | 261  | 0   | 33   | 102  |
| 438  | 661 | 478  | 3015 | 113 | 2028 | 3668 |
| 13   | 25  | 50   | 129  | 23  | 92   | 439  |
| 10   | 11  | 29   | 84   | 0   | 50   | 103  |
| 13   | 0   | 11   | 161  | 0   | 138  | 20   |
| 414  | 268 | 1602 | 2406 | 45  | 1711 | 1016 |
| 53   | 28  | 37   | 274  | 0   | 38   | 369  |
| 29   | 62  | 13   | 83   | 0   | 34   | 743  |
| 0    | 0   | 0    | 10   | 0   | 89   | 0    |
| 33   | 44  | 114  | 274  | 0   | 142  | 140  |
| 146  | 0   | 59   | 282  | 0   | 217  | 734  |
| 0    | 0   | 0    | 47   | 0   | 0    | 129  |
| 145  | 203 | 60   | 221  | 10  | 206  | 466  |
| 142  | 12  | 109  | 295  | 0   | 193  | 1132 |
| 142  | 138 | 129  | 400  | 0   | 46   | 558  |
| 137  | 99  | 43   | 824  | 0   | 70   | 305  |
| 134  | 87  | 0    | 876  | 0   | 75   | 499  |
| 0    | 0   | 0    | 0    | 0   | 0    | 200  |
| 379  | 100 | 13   | 96   | 0   | 441  | 224  |
| 221  | 0   | 177  | 132  | 0   | 158  | 664  |
| 40   | 17  | 47   | 47   | 0   | 40   | 119  |

|      |      |      |      |    |     |      |
|------|------|------|------|----|-----|------|
| 256  | 2152 | 1248 | 819  | 14 | 207 | 375  |
| 277  | 11   | 194  | 376  | 11 | 29  | 399  |
| 1107 | 46   | 0    | 303  | 0  | 119 | 44   |
| 497  | 0    | 193  | 371  | 14 | 48  | 344  |
| 0    | 0    | 57   | 25   | 11 | 14  | 48   |
| 0    | 0    | 61   | 43   | 0  | 0   | 13   |
| 55   | 48   | 48   | 254  | 0  | 0   | 194  |
| 62   | 0    | 0    | 49   | 11 | 26  | 37   |
| 0    | 99   | 10   | 14   | 0  | 0   | 0    |
| 0    | 69   | 17   | 42   | 0  | 0   | 14   |
| 0    | 0    | 0    | 14   | 0  | 0   | 0    |
| 504  | 184  | 198  | 336  | 0  | 0   | 317  |
| 0    | 36   | 0    | 38   | 0  | 0   | 0    |
| 55   | 28   | 0    | 251  | 0  | 0   | 0    |
| 0    | 89   | 47   | 11   | 0  | 0   | 0    |
| 0    | 0    | 28   | 28   | 0  | 0   | 0    |
| 0    | 49   | 0    | 17   | 0  | 0   | 0    |
| 0    | 132  | 142  | 330  | 0  | 0   | 0    |
| 441  | 172  | 1519 | 2698 | 45 | 482 | 1478 |
| 0    | 343  | 33   | 147  | 0  | 0   | 0    |
| 0    | 0    | 31   | 22   | 0  | 0   | 0    |
| 0    | 295  | 70   | 195  | 0  | 0   | 0    |
| 0    | 0    | 16   | 0    | 0  | 0   | 0    |
| 293  | 216  | 1316 | 2510 | 0  | 677 | 1114 |
| 0    | 0    | 0    | 12   | 0  | 0   | 0    |
| 0    | 0    | 102  | 247  | 0  | 0   | 47   |
| 0    | 24   | 37   | 123  | 0  | 0   | 243  |
| 41   | 13   | 59   | 25   | 0  | 42  | 257  |
| 0    | 0    | 41   | 33   | 0  | 0   | 0    |
| 10   | 0    | 50   | 152  | 0  | 24  | 56   |
| 0    | 0    | 24   | 58   | 0  | 0   | 0    |
| 0    | 79   | 43   | 55   | 0  | 0   | 0    |
| 0    | 0    | 0    | 42   | 0  | 0   | 36   |
| 12   | 0    | 66   | 167  | 0  | 0   | 40   |
| 25   | 24   | 118  | 1051 | 0  | 14  | 624  |
| 0    | 0    | 32   | 46   | 0  | 0   | 27   |
| 0    | 0    | 36   | 0    | 0  | 0   | 16   |
| 0    | 0    | 0    | 18   | 0  | 0   | 0    |
| 0    | 0    | 35   | 49   | 0  | 0   | 10   |
| 10   | 0    | 57   | 62   | 0  | 30  | 17   |
| 0    | 0    | 22   | 0    | 0  | 0   | 0    |
| 0    | 0    | 158  | 179  | 0  | 0   | 128  |
| 38   | 0    | 42   | 126  | 32 | 19  | 84   |
| 36   | 0    | 147  | 125  | 0  | 15  | 63   |
| 0    | 0    | 26   | 10   | 0  | 0   | 0    |
| 0    | 0    | 0    | 0    | 0  | 0   | 0    |

|     |     |      |      |     |      |     |
|-----|-----|------|------|-----|------|-----|
| 16  | 230 | 177  | 229  | 0   | 0    | 101 |
| 0   | 0   | 11   | 27   | 0   | 0    | 0   |
| 11  | 20  | 0    | 0    | 0   | 0    | 12  |
| 721 | 183 | 3223 | 1991 | 197 | 1007 | 546 |
| 0   | 0   | 188  | 195  | 0   | 0    | 25  |
| 0   | 0   | 222  | 274  | 0   | 0    | 14  |
| 0   | 266 | 189  | 108  | 0   | 0    | 44  |
| 0   | 262 | 295  | 273  | 0   | 0    | 89  |
| 0   | 0   | 13   | 21   | 0   | 0    | 15  |
| 13  | 130 | 80   | 45   | 0   | 65   | 107 |
| 66  | 473 | 63   | 471  | 0   | 150  | 222 |
| 186 | 114 | 693  | 1125 | 148 | 150  | 310 |
| 65  | 932 | 1305 | 1273 | 0   | 155  | 363 |
| 267 | 55  | 2362 | 1587 | 42  | 554  | 367 |
| 0   | 32  | 188  | 199  | 0   | 0    | 85  |
| 0   | 0   | 24   | 26   | 0   | 0    | 0   |
| 0   | 0   | 0    | 10   | 0   | 0    | 0   |
| 0   | 16  | 553  | 219  | 0   | 22   | 0   |
| 0   | 0   | 0    | 10   | 0   | 0    | 0   |
| 0   | 16  | 41   | 24   | 0   | 11   | 0   |
| 52  | 29  | 190  | 268  | 0   | 212  | 203 |
| 0   | 0   | 0    | 11   | 0   | 0    | 0   |
| 12  | 165 | 202  | 289  | 0   | 46   | 101 |
| 232 | 340 | 1754 | 1833 | 0   | 1023 | 282 |
| 0   | 0   | 24   | 22   | 0   | 10   | 0   |
| 0   | 0   | 41   | 22   | 0   | 22   | 0   |
| 22  | 348 | 31   | 259  | 0   | 27   | 0   |
| 0   | 0   | 0    | 0    | 0   | 0    | 0   |
| 208 | 20  | 1645 | 1360 | 24  | 146  | 441 |
| 0   | 0   | 150  | 79   | 0   | 0    | 13  |
| 0   | 0   | 27   | 21   | 0   | 0    | 12  |
| 0   | 12  | 301  | 139  | 0   | 0    | 61  |
| 29  | 0   | 86   | 196  | 0   | 18   | 50  |
| 0   | 0   | 36   | 37   | 0   | 0    | 0   |
| 0   | 0   | 13   | 0    | 0   | 0    | 0   |
| 0   | 0   | 0    | 0    | 0   | 0    | 0   |
| 14  | 10  | 11   | 57   | 0   | 22   | 0   |
| 277 | 971 | 514  | 612  | 40  | 131  | 316 |
| 0   | 0   | 0    | 25   | 0   | 0    | 0   |
| 0   | 537 | 62   | 76   | 0   | 0    | 21  |
| 11  | 722 | 34   | 25   | 0   | 0    | 106 |
| 74  | 24  | 41   | 36   | 0   | 0    | 13  |
| 0   | 39  | 100  | 26   | 0   | 0    | 0   |
| 0   | 49  | 12   | 0    | 0   | 0    | 0   |
| 0   | 0   | 14   | 14   | 0   | 0    | 0   |
| 0   | 27  | 50   | 14   | 0   | 0    | 0   |

|      |     |       |       |     |      |       |
|------|-----|-------|-------|-----|------|-------|
| 462  | 82  | 57    | 113   | 0   | 88   | 30    |
| 0    | 218 | 10    | 12    | 0   | 0    | 30    |
| 0    | 35  | 0     | 0     | 0   | 0    | 0     |
| 0    | 100 | 0     | 10    | 0   | 0    | 10    |
| 0    | 0   | 53    | 44    | 0   | 0    | 0     |
| 0    | 0   | 192   | 80    | 0   | 0    | 28    |
| 0    | 103 | 52    | 27    | 0   | 0    | 13    |
| 10   | 89  | 13    | 47    | 0   | 42   | 23    |
| 1267 | 772 | 4721  | 3491  | 176 | 1536 | 1203  |
| 130  | 16  | 104   | 82    | 25  | 68   | 41    |
| 10   | 14  | 100   | 74    | 0   | 67   | 120   |
| 399  | 428 | 5658  | 1543  | 25  | 665  | 442   |
| 0    | 0   | 12    | 262   | 0   | 0    | 0     |
| 0    | 0   | 0     | 124   | 0   | 0    | 0     |
| 0    | 17  | 872   | 78    | 0   | 38   | 21    |
| 582  | 847 | 3537  | 1382  | 0   | 1136 | 519   |
| 48   | 37  | 208   | 222   | 0   | 222  | 76    |
| 0    | 0   | 28    | 21    | 0   | 0    | 0     |
| 0    | 25  | 60    | 65    | 0   | 0    | 25    |
| 0    | 36  | 21    | 20    | 0   | 0    | 0     |
| 0    | 48  | 10    | 11    | 0   | 0    | 12    |
| 0    | 0   | 0     | 14    | 0   | 0    | 12    |
| 0    | 0   | 47    | 33    | 0   | 0    | 0     |
| 67   | 97  | 149   | 407   | 0   | 123  | 105   |
| 139  | 488 | 2752  | 2303  | 39  | 403  | 4237  |
| 652  | 385 | 1490  | 1856  | 52  | 1110 | 1546  |
| 68   | 16  | 95    | 127   | 10  | 41   | 156   |
| 47   | 139 | 44    | 38    | 0   | 108  | 47    |
| 125  | 333 | 165   | 133   | 0   | 160  | 651   |
| 0    | 51  | 0     | 0     | 0   | 0    | 0     |
| 0    | 0   | 0     | 0     | 0   | 0    | 0     |
| 0    | 0   | 64    | 75    | 0   | 0    | 57    |
| 61   | 0   | 11    | 49    | 0   | 14   | 95    |
| 63   | 0   | 0     | 36    | 0   | 54   | 67    |
| 89   | 0   | 72    | 135   | 0   | 150  | 147   |
| 0    | 749 | 0     | 55    | 0   | 0    | 29    |
| 65   | 26  | 2468  | 1489  | 0   | 0    | 4451  |
| 2664 | 496 | 16832 | 19031 | 203 | 733  | 39529 |
| 55   | 159 | 434   | 613   | 0   | 0    | 826   |
| 0    | 0   | 48    | 49    | 0   | 0    | 58    |
| 486  | 0   | 6528  | 4969  | 0   | 66   | 4356  |
| 10   | 0   | 54    | 41    | 0   | 0    | 464   |
| 16   | 0   | 263   | 157   | 10  | 0    | 159   |
| 55   | 0   | 622   | 426   | 0   | 0    | 258   |
| 0    | 0   | 33    | 0     | 0   | 0    | 34    |
| 43   | 97  | 1291  | 1071  | 0   | 15   | 490   |

|      |      |       |       |      |      |      |
|------|------|-------|-------|------|------|------|
| 26   | 0    | 901   | 379   | 0    | 0    | 46   |
| 23   | 0    | 276   | 371   | 0    | 0    | 165  |
| 0    | 0    | 15    | 0     | 0    | 0    | 40   |
| 379  | 20   | 3689  | 2904  | 0    | 176  | 2346 |
| 21   | 0    | 12    | 96    | 0    | 28   | 0    |
| 44   | 48   | 23    | 108   | 0    | 92   | 142  |
| 77   | 55   | 95    | 264   | 0    | 168  | 182  |
| 66   | 20   | 12    | 51    | 0    | 35   | 291  |
| 14   | 45   | 58    | 106   | 0    | 68   | 18   |
| 0    | 0    | 25    | 30    | 0    | 0    | 56   |
| 309  | 151  | 533   | 485   | 0    | 265  | 1660 |
| 46   | 0    | 560   | 631   | 0    | 0    | 271  |
| 0    | 0    | 220   | 232   | 0    | 0    | 15   |
| 0    | 0    | 131   | 86    | 42   | 32   | 56   |
| 0    | 1366 | 15    | 22    | 13   | 53   | 11   |
| 0    | 0    | 0     | 0     | 0    | 0    | 0    |
| 0    | 0    | 54    | 0     | 0    | 0    | 0    |
| 0    | 0    | 84    | 25    | 12   | 0    | 15   |
| 119  | 70   | 429   | 524   | 23   | 155  | 169  |
| 0    | 0    | 36    | 102   | 0    | 0    | 0    |
| 23   | 1703 | 1030  | 584   | 0    | 32   | 40   |
| 0    | 0    | 0     | 0     | 0    | 0    | 10   |
| 54   | 179  | 1163  | 989   | 0    | 80   | 1486 |
| 27   | 52   | 1934  | 1980  | 0    | 0    | 61   |
| 198  | 520  | 2025  | 2393  | 0    | 45   | 3475 |
| 0    | 0    | 272   | 308   | 0    | 0    | 0    |
| 0    | 0    | 24    | 0     | 0    | 0    | 10   |
| 22   | 48   | 247   | 996   | 0    | 16   | 82   |
| 0    | 0    | 301   | 302   | 0    | 0    | 0    |
| 0    | 0    | 166   | 110   | 0    | 0    | 0    |
| 47   | 0    | 535   | 611   | 0    | 0    | 0    |
| 0    | 0    | 83    | 59    | 0    | 0    | 0    |
| 0    | 50   | 232   | 139   | 0    | 0    | 0    |
| 14   | 0    | 15    | 92    | 0    | 126  | 22   |
| 0    | 0    | 14    | 0     | 0    | 0    | 0    |
| 0    | 0    | 99    | 80    | 0    | 0    | 60   |
| 25   | 0    | 632   | 753   | 0    | 0    | 142  |
| 10   | 394  | 543   | 380   | 0    | 56   | 365  |
| 2711 | 1109 | 13776 | 15083 | 1609 | 3908 | 7149 |
| 0    | 0    | 939   | 681   | 0    | 0    | 12   |
| 0    | 0    | 0     | 11    | 0    | 0    | 0    |
| 0    | 0    | 173   | 75    | 0    | 0    | 0    |
| 50   | 245  | 256   | 249   | 0    | 62   | 1227 |
| 0    | 0    | 53    | 10    | 0    | 0    | 120  |
| 0    | 0    | 98    | 142   | 0    | 0    | 0    |
| 0    | 0    | 10    | 23    | 0    | 0    | 0    |

|      |      |      |      |     |      |      |
|------|------|------|------|-----|------|------|
| 0    | 0    | 28   | 73   | 0   | 0    | 0    |
| 36   | 29   | 309  | 399  | 0   | 88   | 756  |
| 0    | 0    | 146  | 196  | 0   | 0    | 60   |
| 0    | 0    | 41   | 43   | 0   | 0    | 0    |
| 0    | 0    | 41   | 87   | 0   | 0    | 41   |
| 0    | 11   | 66   | 146  | 0   | 81   | 34   |
| 0    | 0    | 68   | 61   | 0   | 0    | 24   |
| 0    | 0    | 13   | 23   | 0   | 19   | 0    |
| 0    | 0    | 0    | 0    | 0   | 0    | 0    |
| 0    | 0    | 78   | 55   | 0   | 0    | 37   |
| 0    | 55   | 30   | 70   | 0   | 0    | 0    |
| 10   | 13   | 669  | 536  | 0   | 0    | 1052 |
| 1853 | 2999 | 6235 | 5590 | 104 | 3991 | 3669 |
| 272  | 598  | 454  | 1005 | 0   | 458  | 413  |
| 35   | 0    | 1266 | 1192 | 0   | 0    | 254  |
| 0    | 0    | 72   | 41   | 0   | 0    | 0    |
| 0    | 0    | 73   | 40   | 0   | 52   | 0    |
| 0    | 0    | 36   | 0    | 0   | 30   | 20   |
| 46   | 77   | 317  | 152  | 0   | 99   | 56   |
| 378  | 478  | 855  | 1867 | 0   | 777  | 615  |
| 264  | 244  | 1265 | 1043 | 0   | 331  | 520  |
| 68   | 11   | 326  | 296  | 0   | 91   | 122  |
| 19   | 0    | 384  | 314  | 0   | 24   | 253  |
| 0    | 0    | 35   | 54   | 0   | 0    | 0    |
| 18   | 14   | 45   | 0    | 0   | 86   | 0    |
| 0    | 0    | 0    | 13   | 0   | 0    | 0    |
| 0    | 0    | 180  | 242  | 0   | 0    | 39   |
| 122  | 179  | 710  | 790  | 0   | 338  | 516  |
| 0    | 0    | 27   | 77   | 0   | 0    | 70   |
| 0    | 0    | 38   | 107  | 0   | 0    | 0    |
| 0    | 0    | 71   | 274  | 0   | 0    | 22   |
| 0    | 0    | 0    | 0    | 0   | 0    | 0    |
| 604  | 366  | 193  | 1567 | 0   | 136  | 161  |
| 10   | 0    | 47   | 71   | 0   | 0    | 0    |
| 0    | 10   | 43   | 120  | 0   | 96   | 0    |
| 0    | 18   | 36   | 0    | 0   | 0    | 14   |
| 252  | 155  | 22   | 453  | 0   | 30   | 72   |
| 264  | 38   | 25   | 166  | 0   | 41   | 21   |
| 460  | 210  | 28   | 2795 | 0   | 51   | 193  |
| 583  | 504  | 71   | 950  | 0   | 123  | 164  |
| 17   | 21   | 10   | 42   | 0   | 12   | 0    |
| 0    | 189  | 100  | 90   | 0   | 0    | 0    |
| 0    | 79   | 126  | 93   | 0   | 0    | 10   |
| 620  | 1289 | 1050 | 1410 | 0   | 1144 | 2384 |
| 0    | 0    | 11   | 67   | 0   | 0    | 37   |
| 37   | 92   | 94   | 158  | 0   | 0    | 0    |



|      |       |      |      |    |      |      |
|------|-------|------|------|----|------|------|
| 0    | 0     | 24   | 15   | 0  | 0    | 14   |
| 0    | 0     | 119  | 461  | 0  | 0    | 0    |
| 0    | 0     | 24   | 12   | 0  | 0    | 0    |
| 66   | 0     | 2648 | 465  | 0  | 110  | 10   |
| 119  | 50    | 12   | 154  | 29 | 379  | 219  |
| 231  | 89    | 148  | 98   | 0  | 353  | 1012 |
| 126  | 128   | 39   | 148  | 0  | 345  | 146  |
| 0    | 0     | 28   | 10   | 0  | 0    | 204  |
| 124  | 0     | 10   | 82   | 0  | 162  | 615  |
| 12   | 0     | 35   | 379  | 0  | 0    | 23   |
| 0    | 0     | 429  | 267  | 0  | 0    | 14   |
| 16   | 0     | 177  | 179  | 0  | 20   | 231  |
| 0    | 0     | 17   | 38   | 0  | 10   | 95   |
| 0    | 0     | 0    | 0    | 0  | 0    | 0    |
| 0    | 0     | 77   | 21   | 0  | 0    | 0    |
| 0    | 0     | 11   | 25   | 0  | 0    | 0    |
| 0    | 0     | 0    | 0    | 0  | 0    | 0    |
| 0    | 0     | 183  | 213  | 0  | 0    | 212  |
| 0    | 0     | 20   | 48   | 0  | 0    | 30   |
| 57   | 0     | 16   | 0    | 0  | 0    | 30   |
| 375  | 810   | 870  | 170  | 0  | 230  | 219  |
| 0    | 0     | 41   | 0    | 0  | 0    | 0    |
| 1711 | 1020  | 3776 | 1377 | 0  | 1184 | 1312 |
| 0    | 0     | 26   | 0    | 0  | 0    | 0    |
| 851  | 186   | 2771 | 1333 | 75 | 553  | 706  |
| 0    | 0     | 0    | 17   | 0  | 0    | 0    |
| 635  | 47    | 554  | 110  | 0  | 119  | 210  |
| 383  | 169   | 1086 | 398  | 10 | 236  | 207  |
| 0    | 0     | 30   | 18   | 0  | 0    | 0    |
| 0    | 0     | 0    | 42   | 0  | 0    | 0    |
| 0    | 0     | 17   | 0    | 0  | 0    | 0    |
| 0    | 13    | 0    | 64   | 0  | 14   | 0    |
| 0    | 0     | 0    | 39   | 0  | 14   | 0    |
| 0    | 72    | 112  | 71   | 0  | 0    | 10   |
| 0    | 413   | 0    | 135  | 0  | 28   | 11   |
| 0    | 100   | 0    | 16   | 0  | 11   | 0    |
| 0    | 235   | 0    | 207  | 0  | 49   | 0    |
| 0    | 27    | 0    | 100  | 0  | 0    | 0    |
| 0    | 10    | 109  | 246  | 0  | 10   | 13   |
| 0    | 345   | 79   | 0    | 0  | 0    | 0    |
| 0    | 6629  | 36   | 0    | 0  | 0    | 0    |
| 0    | 0     | 0    | 63   | 0  | 0    | 0    |
| 12   | 14623 | 536  | 2162 | 51 | 103  | 166  |
| 34   | 254   | 0    | 3007 | 0  | 15   | 10   |
| 0    | 2928  | 0    | 573  | 0  | 0    | 17   |
| 0    | 14    | 0    | 28   | 0  | 0    | 0    |

|       |       |      |       |     |       |       |
|-------|-------|------|-------|-----|-------|-------|
| 35    | 0     | 0    | 83    | 0   | 0     | 0     |
| 1044  | 251   | 78   | 1216  | 23  | 283   | 115   |
| 144   | 109   | 0    | 236   | 0   | 59    | 0     |
| 0     | 102   | 11   | 110   | 0   | 0     | 178   |
| 25    | 171   | 0    | 75    | 0   | 22    | 32    |
| 12    | 26    | 423  | 67    | 0   | 29    | 39    |
| 0     | 0     | 12   | 53    | 0   | 26    | 137   |
| 0     | 250   | 0    | 39    | 0   | 25    | 245   |
| 3780  | 474   | 2607 | 7703  | 12  | 3928  | 2167  |
| 562   | 401   | 432  | 1259  | 0   | 6436  | 681   |
| 290   | 100   | 183  | 606   | 0   | 3294  | 238   |
| 23    | 209   | 471  | 278   | 0   | 0     | 117   |
| 0     | 0     | 23   | 0     | 0   | 0     | 15    |
| 0     | 162   | 0    | 16    | 0   | 0     | 36    |
| 0     | 126   | 0    | 0     | 0   | 0     | 0     |
| 0     | 162   | 0    | 119   | 0   | 25    | 149   |
| 13    | 14    | 0    | 22    | 0   | 16    | 0     |
| 0     | 57    | 0    | 63    | 0   | 25    | 13    |
| 0     | 27    | 10   | 0     | 0   | 0     | 0     |
| 63    | 0     | 0    | 175   | 0   | 0     | 0     |
| 52    | 320   | 233  | 388   | 14  | 151   | 194   |
| 273   | 276   | 34   | 348   | 0   | 53    | 390   |
| 0     | 32    | 13   | 0     | 0   | 0     | 18    |
| 0     | 0     | 0    | 27    | 0   | 0     | 0     |
| 0     | 0     | 0    | 0     | 0   | 0     | 0     |
| 374   | 174   | 560  | 701   | 0   | 713   | 77    |
| 3243  | 893   | 5042 | 7100  | 87  | 4818  | 4192  |
| 1232  | 572   | 376  | 790   | 10  | 2578  | 3465  |
| 13293 | 4216  | 7431 | 11079 | 236 | 14191 | 61172 |
| 408   | 341   | 59   | 73    | 0   | 438   | 208   |
| 371   | 212   | 164  | 49    | 0   | 452   | 785   |
| 213   | 23    | 73   | 89    | 0   | 172   | 1389  |
| 2973  | 1372  | 2920 | 1650  | 53  | 2910  | 5938  |
| 903   | 73    | 558  | 663   | 36  | 1965  | 1708  |
| 163   | 88    | 38   | 88    | 0   | 335   | 51    |
| 0     | 0     | 58   | 72    | 0   | 0     | 6974  |
| 153   | 17449 | 609  | 2280  | 148 | 549   | 1223  |
| 138   | 8925  | 665  | 957   | 86  | 550   | 1316  |
| 16    | 13311 | 204  | 692   | 0   | 264   | 850   |
| 268   | 2636  | 757  | 3854  | 0   | 387   | 1715  |
| 0     | 0     | 16   | 133   | 0   | 0     | 0     |
| 0     | 385   | 0    | 30    | 0   | 0     | 22    |
| 193   | 17248 | 1063 | 2656  | 109 | 396   | 3147  |
| 0     | 3044  | 109  | 84    | 0   | 43    | 63    |
| 0     | 0     | 11   | 140   | 0   | 0     | 0     |
| 191   | 32436 | 296  | 2129  | 116 | 413   | 713   |

|      |      |      |      |    |      |      |
|------|------|------|------|----|------|------|
| 266  | 1194 | 38   | 1413 | 0  | 384  | 184  |
| 3094 | 2876 | 4597 | 8155 | 59 | 2272 | 2523 |
| 0    | 0    | 56   | 84   | 0  | 33   | 10   |
| 1650 | 336  | 123  | 976  | 10 | 824  | 38   |
| 89   | 189  | 0    | 234  | 0  | 31   | 134  |
| 0    | 0    | 24   | 25   | 0  | 0    | 10   |
| 1148 | 2782 | 74   | 2666 | 10 | 581  | 355  |
| 48   | 28   | 73   | 79   | 0  | 25   | 62   |
| 0    | 0    | 69   | 42   | 0  | 0    | 14   |
| 0    | 436  | 0    | 228  | 0  | 0    | 0    |
| 50   | 1156 | 0    | 237  | 0  | 15   | 93   |
| 33   | 84   | 0    | 363  | 0  | 0    | 58   |
| 0    | 10   | 14   | 65   | 0  | 0    | 0    |
| 0    | 0    | 25   | 63   | 0  | 0    | 0    |
| 173  | 3760 | 1715 | 1492 | 14 | 27   | 123  |
| 615  | 5669 | 2301 | 5867 | 55 | 1332 | 657  |
| 24   | 135  | 471  | 954  | 38 | 10   | 162  |
| 123  | 305  | 876  | 1239 | 0  | 243  | 380  |
| 0    | 1280 | 297  | 350  | 0  | 20   | 174  |
| 0    | 10   | 0    | 16   | 0  | 0    | 27   |
| 30   | 4278 | 468  | 970  | 0  | 0    | 150  |
| 0    | 0    | 164  | 90   | 0  | 0    | 73   |
| 0    | 0    | 96   | 56   | 0  | 0    | 212  |
| 10   | 0    | 691  | 2205 | 0  | 10   | 22   |
| 66   | 338  | 153  | 144  | 0  | 763  | 35   |
| 0    | 0    | 11   | 69   | 0  | 0    | 0    |
| 0    | 0    | 0    | 30   | 0  | 0    | 0    |
| 0    | 0    | 34   | 197  | 0  | 0    | 0    |
| 0    | 0    | 152  | 1543 | 0  | 0    | 0    |
| 0    | 364  | 106  | 114  | 0  | 0    | 56   |
| 0    | 109  | 35   | 474  | 0  | 26   | 0    |
| 0    | 114  | 0    | 31   | 0  | 0    | 0    |
| 0    | 272  | 56   | 239  | 0  | 278  | 0    |
| 116  | 258  | 388  | 391  | 34 | 1207 | 150  |
| 115  | 355  | 499  | 200  | 0  | 66   | 40   |
| 64   | 16   | 274  | 105  | 0  | 68   | 24   |
| 50   | 25   | 271  | 230  | 0  | 81   | 529  |
| 0    | 0    | 86   | 11   | 0  | 0    | 108  |
| 126  | 30   | 379  | 175  | 51 | 958  | 353  |
| 47   | 82   | 362  | 1402 | 0  | 0    | 22   |
| 21   | 0    | 339  | 134  | 0  | 22   | 76   |
| 165  | 0    | 8378 | 5945 | 10 | 72   | 104  |
| 0    | 0    | 166  | 1756 | 0  | 0    | 0    |
| 172  | 0    | 8393 | 3751 | 0  | 87   | 216  |
| 0    | 0    | 24   | 582  | 0  | 36   | 15   |
| 144  | 10   | 4530 | 4688 | 0  | 60   | 74   |

|    |      |      |     |   |     |     |
|----|------|------|-----|---|-----|-----|
| 0  | 0    | 254  | 137 | 0 | 0   | 0   |
| 13 | 113  | 171  | 153 | 0 | 0   | 0   |
| 24 | 84   | 1301 | 645 | 0 | 19  | 112 |
| 0  | 254  | 35   | 43  | 0 | 0   | 0   |
| 0  | 367  | 0    | 59  | 0 | 10  | 0   |
| 0  | 0    | 20   | 131 | 0 | 0   | 0   |
| 0  | 0    | 0    | 13  | 0 | 0   | 0   |
| 0  | 0    | 0    | 0   | 0 | 0   | 0   |
| 0  | 499  | 0    | 51  | 0 | 0   | 0   |
| 0  | 654  | 357  | 501 | 0 | 0   | 73  |
| 0  | 10   | 96   | 0   | 0 | 10  | 37  |
| 10 | 0    | 53   | 116 | 0 | 47  | 0   |
| 0  | 56   | 0    | 83  | 0 | 78  | 239 |
| 0  | 0    | 0    | 12  | 0 | 58  | 14  |
| 0  | 86   | 10   | 44  | 0 | 251 | 131 |
| 0  | 0    | 0    | 67  | 0 | 18  | 19  |
| 0  | 0    | 0    | 0   | 0 | 62  | 13  |
| 0  | 99   | 0    | 100 | 0 | 40  | 353 |
| 0  | 1381 | 47   | 184 | 0 | 0   | 0   |
| 0  | 95   | 11   | 10  | 0 | 0   | 0   |
| 0  | 11   | 0    | 257 | 0 | 13  | 223 |
| 0  | 20   | 0    | 0   | 0 | 0   | 37  |
| 0  | 0    | 11   | 0   | 0 | 0   | 14  |
| 0  | 0    | 0    | 0   | 0 | 0   | 0   |
| 29 | 54   | 84   | 82  | 0 | 0   | 72  |
| 0  | 0    | 0    | 0   | 0 | 0   | 0   |
| 0  | 0    | 0    | 0   | 0 | 0   | 0   |
| 0  | 0    | 0    | 61  | 0 | 0   | 44  |
| 0  | 0    | 10   | 0   | 0 | 0   | 0   |
| 0  | 360  | 0    | 17  | 0 | 0   | 0   |
| 0  | 30   | 0    | 38  | 0 | 0   | 0   |
| 0  | 0    | 0    | 0   | 0 | 0   | 0   |
| 0  | 0    | 10   | 0   | 0 | 0   | 0   |
| 0  | 17   | 0    | 0   | 0 | 0   | 23  |
| 0  | 0    | 10   | 0   | 0 | 11  | 56  |
| 0  | 0    | 0    | 0   | 0 | 0   | 0   |
| 0  | 0    | 0    | 0   | 0 | 0   | 0   |
| 0  | 0    | 0    | 0   | 0 | 0   | 0   |
| 0  | 0    | 0    | 0   | 0 | 0   | 0   |
| 0  | 0    | 0    | 0   | 0 | 0   | 0   |
| 0  | 0    | 10   | 10  | 0 | 0   | 0   |
| 0  | 0    | 0    | 0   | 0 | 0   | 0   |
| 0  | 0    | 0    | 0   | 0 | 0   | 0   |
| 0  | 0    | 0    | 0   | 0 | 0   | 0   |
| 0  | 0    | 0    | 0   | 0 | 0   | 0   |
| 0  | 0    | 0    | 90  | 0 | 0   | 17  |
| 0  | 0    | 0    | 0   | 0 | 40  | 79  |
| 0  | 46   | 33   | 0   | 0 | 16  | 0   |

|    |     |     |     |    |     |     |
|----|-----|-----|-----|----|-----|-----|
| 0  | 28  | 0   | 0   | 0  | 0   | 0   |
| 0  | 0   | 0   | 10  | 0  | 0   | 0   |
| 0  | 0   | 0   | 0   | 0  | 0   | 0   |
| 0  | 77  | 0   | 66  | 0  | 0   | 18  |
| 0  | 0   | 11  | 11  | 0  | 0   | 38  |
| 0  | 0   | 0   | 0   | 0  | 0   | 0   |
| 0  | 0   | 14  | 38  | 0  | 61  | 14  |
| 0  | 0   | 0   | 10  | 0  | 0   | 0   |
| 0  | 0   | 0   | 0   | 0  | 0   | 0   |
| 0  | 0   | 0   | 0   | 0  | 15  | 33  |
| 0  | 92  | 0   | 0   | 0  | 0   | 0   |
| 15 | 0   | 33  | 23  | 0  | 18  | 0   |
| 0  | 0   | 0   | 0   | 0  | 0   | 15  |
| 0  | 0   | 0   | 0   | 0  | 0   | 0   |
| 0  | 0   | 0   | 10  | 0  | 0   | 0   |
| 0  | 0   | 0   | 17  | 0  | 0   | 0   |
| 0  | 0   | 0   | 34  | 0  | 0   | 0   |
| 0  | 0   | 0   | 34  | 0  | 0   | 0   |
| 25 | 23  | 0   | 22  | 0  | 11  | 188 |
| 28 | 0   | 0   | 52  | 0  | 51  | 0   |
| 0  | 0   | 11  | 11  | 0  | 0   | 207 |
| 0  | 0   | 39  | 0   | 0  | 10  | 50  |
| 0  | 14  | 0   | 112 | 0  | 0   | 0   |
| 29 | 0   | 0   | 104 | 0  | 11  | 15  |
| 0  | 0   | 0   | 0   | 0  | 0   | 0   |
| 0  | 40  | 0   | 27  | 0  | 0   | 0   |
| 0  | 58  | 0   | 0   | 0  | 11  | 0   |
| 0  | 11  | 0   | 0   | 0  | 0   | 0   |
| 0  | 0   | 0   | 0   | 0  | 0   | 0   |
| 0  | 0   | 0   | 0   | 0  | 0   | 0   |
| 0  | 19  | 0   | 0   | 0  | 0   | 10  |
| 0  | 0   | 0   | 0   | 0  | 0   | 0   |
| 0  | 0   | 0   | 69  | 0  | 12  | 0   |
| 0  | 51  | 50  | 16  | 19 | 0   | 28  |
| 0  | 0   | 158 | 0   | 0  | 0   | 0   |
| 0  | 93  | 36  | 20  | 0  | 15  | 0   |
| 0  | 0   | 91  | 0   | 0  | 0   | 0   |
| 61 | 0   | 0   | 84  | 41 | 685 | 0   |
| 0  | 0   | 13  | 0   | 0  | 0   | 0   |
| 0  | 0   | 0   | 0   | 0  | 0   | 91  |
| 10 | 666 | 94  | 51  | 46 | 0   | 15  |
| 0  | 179 | 0   | 12  | 48 | 0   | 0   |
| 15 | 476 | 50  | 29  | 0  | 11  | 0   |
| 0  | 11  | 0   | 46  | 0  | 0   | 0   |
| 24 | 0   | 481 | 0   | 0  | 0   | 28  |
| 0  | 0   | 0   | 18  | 0  | 0   | 0   |

|     |      |      |     |    |     |     |
|-----|------|------|-----|----|-----|-----|
| 0   | 86   | 113  | 0   | 0  | 49  | 21  |
| 0   | 0    | 78   | 0   | 0  | 0   | 0   |
| 0   | 0    | 0    | 15  | 0  | 0   | 137 |
| 0   | 22   | 0    | 0   | 0  | 0   | 0   |
| 142 | 0    | 2200 | 41  | 10 | 0   | 267 |
| 249 | 134  | 78   | 82  | 0  | 350 | 237 |
| 0   | 0    | 13   | 0   | 0  | 0   | 0   |
| 15  | 99   | 24   | 0   | 0  | 0   | 27  |
| 0   | 86   | 0    | 0   | 0  | 0   | 0   |
| 0   | 67   | 0    | 0   | 0  | 0   | 0   |
| 0   | 25   | 0    | 0   | 0  | 0   | 0   |
| 0   | 0    | 0    | 36  | 0  | 0   | 0   |
| 224 | 163  | 0    | 431 | 0  | 28  | 38  |
| 0   | 0    | 0    | 0   | 0  | 0   | 0   |
| 0   | 0    | 0    | 0   | 0  | 0   | 0   |
| 0   | 0    | 0    | 0   | 0  | 0   | 0   |
| 0   | 0    | 0    | 0   | 0  | 0   | 0   |
| 0   | 0    | 0    | 24  | 0  | 0   | 0   |
| 748 | 0    | 29   | 265 | 0  | 0   | 57  |
| 0   | 0    | 0    | 0   | 0  | 0   | 0   |
| 0   | 0    | 0    | 0   | 0  | 0   | 0   |
| 0   | 0    | 0    | 0   | 0  | 0   | 0   |
| 0   | 0    | 0    | 0   | 0  | 0   | 0   |
| 0   | 28   | 133  | 44  | 0  | 12  | 99  |
| 0   | 22   | 120  | 37  | 0  | 34  | 52  |
| 0   | 1712 | 0    | 114 | 0  | 150 | 53  |
| 0   | 0    | 0    | 41  | 0  | 0   | 0   |
| 0   | 0    | 0    | 83  | 0  | 40  | 0   |
| 51  | 29   | 0    | 29  | 0  | 89  | 125 |
| 0   | 0    | 0    | 0   | 0  | 0   | 0   |
| 0   | 0    | 0    | 76  | 0  | 15  | 0   |
| 12  | 40   | 0    | 38  | 0  | 91  | 0   |
| 0   | 0    | 0    | 0   | 0  | 0   | 0   |
| 53  | 133  | 15   | 82  | 0  | 127 | 596 |
| 0   | 0    | 141  | 14  | 0  | 0   | 17  |
| 0   | 0    | 0    | 0   | 0  | 0   | 0   |
| 0   | 0    | 0    | 0   | 0  | 0   | 0   |
| 0   | 0    | 10   | 11  | 0  | 18  | 0   |
| 0   | 30   | 0    | 52  | 0  | 13  | 11  |
| 0   | 0    | 85   | 13  | 0  | 209 | 0   |
| 0   | 0    | 0    | 0   | 0  | 12  | 0   |
| 0   | 0    | 0    | 0   | 0  | 0   | 58  |
| 0   | 0    | 0    | 10  | 0  | 447 | 0   |
| 0   | 11   | 10   | 23  | 0  | 0   | 0   |
| 0   | 0    | 0    | 0   | 0  | 0   | 0   |
| 146 | 0    | 401  | 25  | 0  | 38  | 234 |

|     |      |     |     |   |     |      |
|-----|------|-----|-----|---|-----|------|
| 0   | 2957 | 57  | 537 | 0 | 0   | 92   |
| 0   | 0    | 0   | 0   | 0 | 0   | 11   |
| 0   | 16   | 0   | 0   | 0 | 0   | 0    |
| 0   | 0    | 0   | 11  | 0 | 0   | 0    |
| 43  | 13   | 0   | 21  | 0 | 81  | 14   |
| 51  | 0    | 0   | 0   | 0 | 0   | 0    |
| 0   | 0    | 0   | 0   | 0 | 0   | 27   |
| 144 | 17   | 0   | 0   | 0 | 73  | 0    |
| 0   | 0    | 13  | 0   | 0 | 0   | 0    |
| 0   | 0    | 0   | 0   | 0 | 0   | 0    |
| 0   | 0    | 34  | 124 | 0 | 34  | 46   |
| 22  | 0    | 13  | 0   | 0 | 26  | 11   |
| 404 | 72   | 90  | 138 | 0 | 278 | 84   |
| 0   | 0    | 0   | 0   | 0 | 29  | 0    |
| 168 | 0    | 42  | 87  | 0 | 86  | 36   |
| 0   | 0    | 65  | 38  | 0 | 0   | 0    |
| 10  | 0    | 0   | 0   | 0 | 12  | 20   |
| 29  | 0    | 0   | 21  | 0 | 0   | 0    |
| 21  | 0    | 0   | 38  | 0 | 0   | 89   |
| 0   | 0    | 0   | 0   | 0 | 0   | 0    |
| 0   | 0    | 0   | 0   | 0 | 0   | 0    |
| 0   | 0    | 0   | 19  | 0 | 21  | 0    |
| 0   | 0    | 47  | 26  | 0 | 0   | 11   |
| 0   | 0    | 101 | 104 | 0 | 29  | 20   |
| 0   | 0    | 0   | 11  | 0 | 204 | 0    |
| 0   | 0    | 0   | 0   | 0 | 114 | 0    |
| 22  | 137  | 11  | 56  | 0 | 223 | 50   |
| 0   | 45   | 0   | 11  | 0 | 63  | 23   |
| 55  | 157  | 27  | 46  | 0 | 153 | 87   |
| 0   | 0    | 0   | 0   | 0 | 0   | 0    |
| 0   | 0    | 0   | 0   | 0 | 0   | 410  |
| 0   | 0    | 11  | 0   | 0 | 37  | 1031 |
| 0   | 0    | 0   | 0   | 0 | 0   | 106  |
| 0   | 0    | 0   | 15  | 0 | 34  | 1053 |
| 0   | 0    | 0   | 0   | 0 | 0   | 72   |
| 0   | 0    | 0   | 0   | 0 | 0   | 26   |
| 0   | 0    | 0   | 0   | 0 | 0   | 98   |
| 26  | 17   | 24  | 46  | 0 | 52  | 39   |
| 71  | 0    | 44  | 21  | 0 | 74  | 29   |
| 0   | 0    | 0   | 0   | 0 | 0   | 0    |
| 0   | 0    | 0   | 168 | 0 | 30  | 513  |
| 38  | 0    | 0   | 70  | 0 | 0   | 0    |
| 0   | 0    | 0   | 0   | 0 | 0   | 0    |
| 0   | 0    | 0   | 0   | 0 | 0   | 0    |
| 0   | 0    | 30  | 55  | 0 | 0   | 0    |
| 0   | 0    | 0   | 20  | 0 | 0   | 0    |

|     |     |     |     |    |     |     |
|-----|-----|-----|-----|----|-----|-----|
| 0   | 0   | 0   | 0   | 0  | 0   | 0   |
| 11  | 78  | 0   | 252 | 0  | 245 | 82  |
| 0   | 0   | 0   | 0   | 0  | 0   | 0   |
| 0   | 17  | 0   | 26  | 0  | 23  | 0   |
| 0   | 32  | 73  | 10  | 0  | 0   | 0   |
| 28  | 10  | 0   | 10  | 0  | 23  | 37  |
| 0   | 0   | 0   | 0   | 0  | 12  | 24  |
| 0   | 0   | 0   | 0   | 0  | 26  | 0   |
| 46  | 10  | 75  | 0   | 0  | 195 | 10  |
| 0   | 92  | 0   | 0   | 0  | 0   | 152 |
| 0   | 0   | 0   | 48  | 0  | 10  | 37  |
| 0   | 0   | 124 | 0   | 0  | 0   | 264 |
| 0   | 0   | 0   | 0   | 0  | 0   | 0   |
| 0   | 0   | 0   | 0   | 0  | 0   | 0   |
| 0   | 0   | 0   | 0   | 0  | 0   | 0   |
| 0   | 0   | 0   | 0   | 0  | 0   | 0   |
| 46  | 0   | 26  | 45  | 0  | 47  | 74  |
| 0   | 0   | 0   | 90  | 0  | 0   | 0   |
| 0   | 191 | 38  | 204 | 0  | 0   | 17  |
| 0   | 0   | 10  | 0   | 0  | 15  | 0   |
| 124 | 64  | 14  | 16  | 0  | 176 | 142 |
| 0   | 0   | 0   | 0   | 0  | 0   | 0   |
| 0   | 0   | 0   | 0   | 0  | 0   | 0   |
| 10  | 0   | 0   | 0   | 0  | 0   | 0   |
| 0   | 0   | 0   | 0   | 0  | 0   | 0   |
| 144 | 0   | 0   | 49  | 0  | 0   | 34  |
| 0   | 0   | 0   | 0   | 0  | 0   | 26  |
| 24  | 13  | 14  | 54  | 0  | 0   | 0   |
| 0   | 0   | 0   | 0   | 0  | 0   | 0   |
| 0   | 0   | 0   | 0   | 0  | 0   | 0   |
| 12  | 0   | 0   | 0   | 0  | 17  | 0   |
| 27  | 0   | 15  | 0   | 0  | 10  | 0   |
| 0   | 0   | 0   | 0   | 0  | 0   | 0   |
| 0   | 0   | 0   | 0   | 0  | 0   | 0   |
| 0   | 0   | 0   | 0   | 10 | 0   | 10  |
| 0   | 0   | 0   | 0   | 0  | 0   | 13  |
| 382 | 0   | 0   | 185 | 0  | 0   | 235 |
| 760 | 0   | 0   | 315 | 0  | 40  | 190 |
| 0   | 0   | 0   | 0   | 0  | 0   | 0   |
| 127 | 0   | 11  | 56  | 0  | 0   | 95  |
| 0   | 0   | 0   | 47  | 0  | 0   | 11  |
| 0   | 0   | 38  | 0   | 0  | 0   | 152 |
| 0   | 0   | 0   | 0   | 0  | 0   | 0   |
| 0   | 0   | 0   | 0   | 0  | 0   | 0   |
| 0   | 0   | 0   | 0   | 0  | 0   | 0   |
| 0   | 0   | 0   | 0   | 0  | 39  | 0   |



|     |      |     |     |    |    |     |
|-----|------|-----|-----|----|----|-----|
| 0   | 0    | 0   | 0   | 0  | 0  | 0   |
| 0   | 0    | 0   | 0   | 0  | 0  | 0   |
| 49  | 0    | 41  | 44  | 0  | 0  | 29  |
| 0   | 711  | 0   | 0   | 0  | 0  | 0   |
| 36  | 25   | 0   | 22  | 0  | 0  | 14  |
| 32  | 0    | 0   | 0   | 0  | 0  | 0   |
| 0   | 18   | 0   | 0   | 0  | 0  | 0   |
| 0   | 0    | 0   | 159 | 35 | 10 | 10  |
| 0   | 0    | 10  | 0   | 0  | 0  | 0   |
| 36  | 241  | 65  | 62  | 0  | 32 | 0   |
| 10  | 59   | 11  | 115 | 33 | 0  | 27  |
| 0   | 365  | 0   | 84  | 0  | 0  | 0   |
| 0   | 0    | 0   | 10  | 0  | 0  | 0   |
| 0   | 92   | 0   | 37  | 0  | 0  | 0   |
| 0   | 0    | 0   | 10  | 0  | 11 | 0   |
| 0   | 0    | 169 | 25  | 0  | 0  | 0   |
| 12  | 0    | 26  | 0   | 0  | 89 | 0   |
| 0   | 0    | 0   | 0   | 0  | 0  | 0   |
| 0   | 264  | 12  | 27  | 0  | 0  | 0   |
| 0   | 0    | 64  | 10  | 0  | 10 | 10  |
| 0   | 0    | 0   | 0   | 0  | 0  | 0   |
| 0   | 0    | 10  | 0   | 0  | 0  | 10  |
| 0   | 0    | 13  | 0   | 0  | 0  | 0   |
| 0   | 0    | 0   | 0   | 0  | 0  | 0   |
| 0   | 0    | 0   | 0   | 0  | 0  | 0   |
| 0   | 0    | 0   | 0   | 0  | 0  | 0   |
| 0   | 0    | 0   | 0   | 0  | 0  | 0   |
| 0   | 40   | 0   | 43  | 0  | 0  | 0   |
| 0   | 0    | 0   | 0   | 0  | 10 | 12  |
| 0   | 0    | 0   | 62  | 0  | 12 | 0   |
| 0   | 0    | 0   | 0   | 0  | 0  | 0   |
| 0   | 0    | 58  | 12  | 0  | 10 | 21  |
| 0   | 0    | 13  | 46  | 0  | 20 | 56  |
| 0   | 0    | 61  | 0   | 0  | 0  | 0   |
| 0   | 0    | 0   | 0   | 0  | 0  | 0   |
| 85  | 1475 | 89  | 343 | 0  | 85 | 30  |
| 0   | 31   | 0   | 0   | 0  | 0  | 13  |
| 0   | 0    | 0   | 10  | 0  | 0  | 0   |
| 0   | 52   | 0   | 16  | 0  | 0  | 0   |
| 272 | 33   | 0   | 133 | 0  | 31 | 45  |
| 0   | 0    | 15  | 14  | 0  | 0  | 0   |
| 0   | 0    | 68  | 33  | 0  | 0  | 0   |
| 0   | 12   | 0   | 224 | 0  | 0  | 0   |
| 0   | 93   | 22  | 0   | 0  | 0  | 0   |
| 0   | 0    | 0   | 17  | 0  | 0  | 0   |
| 38  | 0    | 0   | 10  | 26 | 55 | 154 |
| 0   | 0    | 0   | 0   | 0  | 10 | 10  |

|    |      |     |     |    |     |     |
|----|------|-----|-----|----|-----|-----|
| 0  | 956  | 10  | 0   | 0  | 20  | 0   |
| 0  | 810  | 0   | 0   | 0  | 0   | 0   |
| 0  | 0    | 0   | 0   | 0  | 0   | 0   |
| 0  | 0    | 0   | 0   | 0  | 22  | 0   |
| 15 | 0    | 28  | 35  | 0  | 0   | 25  |
| 21 | 0    | 35  | 59  | 0  | 35  | 26  |
| 0  | 0    | 0   | 0   | 0  | 0   | 0   |
| 0  | 0    | 64  | 78  | 0  | 0   | 11  |
| 0  | 0    | 23  | 0   | 0  | 0   | 0   |
| 0  | 0    | 0   | 0   | 0  | 0   | 0   |
| 0  | 0    | 0   | 0   | 0  | 0   | 0   |
| 0  | 10   | 0   | 0   | 0  | 0   | 0   |
| 0  | 425  | 171 | 21  | 0  | 82  | 16  |
| 15 | 0    | 112 | 0   | 0  | 29  | 0   |
| 0  | 75   | 47  | 10  | 0  | 0   | 46  |
| 11 | 42   | 113 | 46  | 0  | 13  | 0   |
| 0  | 0    | 123 | 10  | 0  | 10  | 0   |
| 0  | 0    | 0   | 0   | 0  | 0   | 0   |
| 0  | 0    | 0   | 26  | 0  | 0   | 0   |
| 0  | 0    | 0   | 0   | 0  | 0   | 0   |
| 0  | 0    | 0   | 0   | 0  | 0   | 0   |
| 0  | 0    | 0   | 0   | 0  | 0   | 0   |
| 13 | 0    | 0   | 0   | 0  | 13  | 0   |
| 0  | 747  | 0   | 140 | 0  | 0   | 10  |
| 0  | 219  | 27  | 33  | 0  | 0   | 0   |
| 0  | 492  | 20  | 55  | 13 | 37  | 72  |
| 0  | 32   | 0   | 0   | 0  | 0   | 0   |
| 12 | 182  | 0   | 63  | 0  | 0   | 0   |
| 0  | 454  | 0   | 40  | 0  | 0   | 0   |
| 0  | 0    | 0   | 0   | 0  | 0   | 0   |
| 0  | 0    | 0   | 0   | 0  | 0   | 0   |
| 0  | 0    | 0   | 0   | 0  | 0   | 72  |
| 0  | 0    | 0   | 0   | 0  | 0   | 0   |
| 0  | 0    | 0   | 0   | 0  | 0   | 0   |
| 0  | 100  | 0   | 0   | 0  | 0   | 0   |
| 0  | 105  | 0   | 24  | 0  | 0   | 14  |
| 0  | 0    | 25  | 27  | 0  | 80  | 0   |
| 0  | 0    | 91  | 0   | 0  | 0   | 0   |
| 0  | 0    | 51  | 0   | 0  | 0   | 0   |
| 0  | 0    | 0   | 0   | 0  | 0   | 0   |
| 25 | 229  | 52  | 138 | 0  | 141 | 321 |
| 0  | 653  | 0   | 75  | 0  | 42  | 0   |
| 10 | 0    | 0   | 83  | 0  | 0   | 0   |
| 0  | 1071 | 10  | 57  | 0  | 0   | 16  |
| 0  | 141  | 0   | 46  | 0  | 0   | 0   |
| 0  | 0    | 0   | 0   | 0  | 0   | 0   |

|     |      |     |     |    |     |     |
|-----|------|-----|-----|----|-----|-----|
| 0   | 0    | 0   | 0   | 0  | 0   | 0   |
| 0   | 0    | 0   | 0   | 0  | 0   | 0   |
| 0   | 43   | 0   | 13  | 0  | 0   | 0   |
| 0   | 0    | 0   | 0   | 0  | 0   | 0   |
| 0   | 0    | 0   | 10  | 0  | 0   | 0   |
| 0   | 0    | 0   | 0   | 0  | 0   | 0   |
| 0   | 0    | 0   | 0   | 0  | 0   | 0   |
| 0   | 14   | 0   | 0   | 0  | 27  | 0   |
| 26  | 14   | 11  | 62  | 0  | 26  | 0   |
| 0   | 0    | 0   | 0   | 0  | 0   | 0   |
| 21  | 0    | 0   | 0   | 0  | 0   | 10  |
| 0   | 0    | 0   | 0   | 0  | 0   | 0   |
| 0   | 39   | 24  | 141 | 0  | 0   | 19  |
| 22  | 549  | 14  | 10  | 0  | 0   | 0   |
| 0   | 214  | 0   | 114 | 0  | 96  | 116 |
| 210 | 57   | 0   | 52  | 0  | 43  | 0   |
| 0   | 10   | 0   | 0   | 0  | 0   | 54  |
| 0   | 403  | 0   | 10  | 0  | 52  | 0   |
| 0   | 0    | 0   | 0   | 0  | 0   | 0   |
| 14  | 31   | 0   | 0   | 0  | 0   | 10  |
| 11  | 36   | 0   | 0   | 0  | 0   | 0   |
| 41  | 90   | 0   | 67  | 26 | 84  | 151 |
| 0   | 10   | 11  | 40  | 0  | 0   | 0   |
| 0   | 0    | 0   | 0   | 0  | 0   | 0   |
| 0   | 0    | 0   | 0   | 0  | 0   | 0   |
| 0   | 0    | 0   | 0   | 0  | 0   | 0   |
| 0   | 0    | 0   | 0   | 0  | 0   | 0   |
| 44  | 47   | 0   | 32  | 0  | 119 | 953 |
| 12  | 0    | 0   | 13  | 0  | 0   | 0   |
| 10  | 0    | 0   | 0   | 0  | 10  | 0   |
| 81  | 52   | 23  | 101 | 0  | 536 | 68  |
| 94  | 59   | 79  | 42  | 0  | 142 | 474 |
| 50  | 100  | 0   | 45  | 0  | 278 | 95  |
| 0   | 0    | 0   | 0   | 0  | 0   | 0   |
| 0   | 10   | 0   | 25  | 0  | 0   | 0   |
| 0   | 0    | 0   | 0   | 0  | 0   | 0   |
| 0   | 0    | 0   | 0   | 0  | 0   | 0   |
| 0   | 10   | 0   | 0   | 0  | 21  | 32  |
| 0   | 1205 | 0   | 0   | 0  | 0   | 0   |
| 0   | 0    | 0   | 0   | 0  | 0   | 0   |
| 0   | 16   | 0   | 0   | 0  | 0   | 0   |
| 0   | 0    | 114 | 166 | 0  | 0   | 23  |
| 0   | 0    | 0   | 0   | 0  | 0   | 0   |
| 0   | 0    | 21  | 43  | 0  | 0   | 0   |
| 0   | 0    | 0   | 0   | 0  | 0   | 0   |
| 0   | 0    | 0   | 0   | 0  | 0   | 0   |

|     |      |     |     |   |    |     |
|-----|------|-----|-----|---|----|-----|
| 0   | 0    | 0   | 47  | 0 | 0  | 0   |
| 0   | 0    | 0   | 12  | 0 | 0  | 0   |
| 0   | 0    | 15  | 0   | 0 | 0  | 0   |
| 0   | 0    | 0   | 0   | 0 | 0  | 0   |
| 0   | 10   | 198 | 14  | 0 | 25 | 0   |
| 0   | 0    | 0   | 25  | 0 | 0  | 0   |
| 0   | 143  | 0   | 0   | 0 | 0  | 0   |
| 0   | 0    | 0   | 0   | 0 | 0  | 0   |
| 0   | 89   | 0   | 62  | 0 | 11 | 21  |
| 104 | 262  | 0   | 10  | 0 | 0  | 0   |
| 0   | 392  | 10  | 22  | 0 | 0  | 20  |
| 25  | 74   | 0   | 270 | 0 | 57 | 17  |
| 0   | 0    | 0   | 0   | 0 | 0  | 0   |
| 0   | 0    | 0   | 0   | 0 | 0  | 0   |
| 0   | 1265 | 24  | 81  | 0 | 10 | 34  |
| 0   | 0    | 0   | 0   | 0 | 60 | 0   |
| 0   | 0    | 0   | 0   | 0 | 0  | 0   |
| 0   | 197  | 0   | 0   | 0 | 0  | 0   |
| 0   | 0    | 0   | 0   | 0 | 0  | 391 |
| 0   | 0    | 11  | 15  | 0 | 0  | 0   |
| 0   | 0    | 39  | 0   | 0 | 26 | 439 |
| 0   | 114  | 0   | 20  | 0 | 0  | 0   |
| 0   | 0    | 0   | 0   | 0 | 0  | 32  |
| 0   | 0    | 0   | 0   | 0 | 0  | 0   |
| 0   | 0    | 21  | 13  | 0 | 23 | 0   |
| 0   | 10   | 0   | 0   | 0 | 13 | 0   |
| 0   | 0    | 0   | 0   | 0 | 0  | 0   |
| 0   | 35   | 0   | 0   | 0 | 0  | 0   |
| 0   | 21   | 0   | 0   | 0 | 0  | 0   |
| 0   | 0    | 12  | 0   | 0 | 0  | 12  |
| 0   | 0    | 0   | 0   | 0 | 0  | 0   |
| 0   | 0    | 0   | 30  | 0 | 0  | 0   |
| 0   | 0    | 182 | 12  | 0 | 30 | 42  |
| 0   | 0    | 0   | 0   | 0 | 0  | 14  |
| 0   | 0    | 0   | 24  | 0 | 0  | 0   |
| 38  | 11   | 64  | 32  | 0 | 0  | 75  |
| 25  | 0    | 0   | 40  | 0 | 0  | 11  |
| 0   | 0    | 12  | 53  | 0 | 0  | 94  |
| 0   | 0    | 0   | 0   | 0 | 0  | 0   |
| 0   | 0    | 0   | 0   | 0 | 10 | 0   |
| 0   | 0    | 0   | 0   | 0 | 12 | 0   |
| 0   | 0    | 0   | 0   | 0 | 10 | 0   |
| 0   | 0    | 0   | 0   | 0 | 34 | 0   |
| 0   | 0    | 0   | 0   | 0 | 0  | 0   |
| 0   | 0    | 0   | 0   | 0 | 0  | 17  |
| 0   | 44   | 0   | 10  | 0 | 0  | 0   |

|     |     |     |     |    |     |     |
|-----|-----|-----|-----|----|-----|-----|
| 0   | 0   | 0   | 0   | 0  | 0   | 0   |
| 0   | 11  | 0   | 0   | 0  | 0   | 33  |
| 0   | 72  | 12  | 15  | 0  | 0   | 0   |
| 251 | 24  | 50  | 26  | 0  | 24  | 40  |
| 0   | 56  | 0   | 0   | 0  | 0   | 0   |
| 0   | 12  | 0   | 27  | 0  | 0   | 0   |
| 0   | 0   | 0   | 0   | 0  | 0   | 0   |
| 0   | 0   | 0   | 54  | 0  | 11  | 0   |
| 0   | 0   | 0   | 45  | 13 | 0   | 0   |
| 0   | 0   | 0   | 0   | 0  | 0   | 0   |
| 0   | 0   | 0   | 21  | 0  | 0   | 0   |
| 0   | 0   | 0   | 52  | 0  | 0   | 0   |
| 0   | 13  | 0   | 23  | 0  | 0   | 0   |
| 0   | 45  | 49  | 43  | 0  | 0   | 374 |
| 0   | 0   | 0   | 17  | 0  | 0   | 0   |
| 0   | 0   | 0   | 0   | 0  | 0   | 0   |
| 0   | 0   | 0   | 0   | 0  | 0   | 13  |
| 0   | 0   | 44  | 0   | 0  | 0   | 180 |
| 0   | 0   | 0   | 0   | 0  | 0   | 0   |
| 0   | 0   | 11  | 110 | 0  | 0   | 15  |
| 0   | 0   | 0   | 0   | 0  | 35  | 49  |
| 0   | 0   | 0   | 31  | 0  | 0   | 14  |
| 0   | 31  | 0   | 0   | 0  | 0   | 10  |
| 0   | 12  | 0   | 0   | 0  | 0   | 0   |
| 0   | 0   | 0   | 0   | 0  | 0   | 0   |
| 0   | 0   | 0   | 0   | 0  | 0   | 176 |
| 0   | 0   | 0   | 0   | 0  | 11  | 37  |
| 0   | 0   | 0   | 0   | 0  | 0   | 37  |
| 0   | 0   | 0   | 0   | 0  | 0   | 71  |
| 0   | 10  | 21  | 0   | 0  | 0   | 0   |
| 0   | 97  | 0   | 10  | 0  | 0   | 0   |
| 0   | 0   | 0   | 0   | 0  | 0   | 0   |
| 0   | 0   | 0   | 0   | 0  | 0   | 0   |
| 0   | 39  | 24  | 0   | 0  | 170 | 0   |
| 0   | 0   | 0   | 0   | 0  | 0   | 0   |
| 0   | 112 | 0   | 0   | 0  | 0   | 0   |
| 0   | 0   | 0   | 0   | 0  | 0   | 0   |
| 0   | 0   | 0   | 0   | 0  | 0   | 0   |
| 0   | 0   | 14  | 15  | 0  | 13  | 10  |
| 0   | 12  | 0   | 24  | 0  | 0   | 0   |
| 74  | 0   | 844 | 0   | 0  | 0   | 25  |
| 0   | 0   | 0   | 0   | 0  | 0   | 0   |
| 0   | 0   | 0   | 0   | 0  | 0   | 0   |
| 0   | 0   | 0   | 0   | 0  | 0   | 0   |
| 0   | 0   | 0   | 0   | 0  | 0   | 0   |
| 0   | 0   | 0   | 0   | 0  | 0   | 42  |

|     |     |    |    |   |     |     |
|-----|-----|----|----|---|-----|-----|
| 0   | 0   | 0  | 0  | 0 | 0   | 627 |
| 0   | 0   | 0  | 0  | 0 | 0   | 0   |
| 0   | 0   | 0  | 0  | 0 | 0   | 0   |
| 0   | 103 | 0  | 0  | 0 | 0   | 0   |
| 0   | 759 | 0  | 0  | 0 | 0   | 107 |
| 0   | 51  | 0  | 0  | 0 | 0   | 0   |
| 0   | 0   | 0  | 0  | 0 | 0   | 0   |
| 0   | 0   | 86 | 0  | 0 | 0   | 0   |
| 0   | 0   | 0  | 0  | 0 | 0   | 0   |
| 0   | 0   | 0  | 40 | 0 | 10  | 26  |
| 0   | 0   | 0  | 0  | 0 | 0   | 0   |
| 0   | 0   | 0  | 0  | 0 | 0   | 42  |
| 0   | 0   | 0  | 0  | 0 | 0   | 0   |
| 0   | 0   | 0  | 0  | 0 | 0   | 0   |
| 0   | 0   | 0  | 0  | 0 | 0   | 0   |
| 0   | 0   | 0  | 0  | 0 | 0   | 0   |
| 11  | 0   | 0  | 10 | 0 | 14  | 0   |
| 0   | 0   | 0  | 0  | 0 | 0   | 0   |
| 167 | 0   | 0  | 75 | 0 | 0   | 0   |
| 0   | 0   | 15 | 0  | 0 | 0   | 0   |
| 0   | 0   | 0  | 0  | 0 | 10  | 0   |
| 0   | 0   | 0  | 0  | 0 | 0   | 0   |
| 0   | 0   | 0  | 0  | 0 | 0   | 0   |
| 0   | 0   | 21 | 0  | 0 | 0   | 0   |
| 0   | 0   | 0  | 0  | 0 | 0   | 0   |
| 0   | 0   | 0  | 0  | 0 | 0   | 0   |
| 0   | 0   | 0  | 0  | 0 | 0   | 0   |
| 0   | 0   | 0  | 0  | 0 | 0   | 170 |
| 0   | 0   | 0  | 0  | 0 | 0   | 0   |
| 0   | 0   | 0  | 0  | 0 | 0   | 118 |
| 0   | 0   | 0  | 0  | 0 | 0   | 0   |
| 0   | 0   | 0  | 0  | 0 | 0   | 0   |
| 0   | 145 | 0  | 21 | 0 | 0   | 0   |
| 0   | 26  | 10 | 28 | 0 | 0   | 0   |
| 0   | 0   | 14 | 0  | 0 | 0   | 0   |
| 33  | 0   | 0  | 26 | 0 | 10  | 39  |
| 0   | 0   | 0  | 0  | 0 | 0   | 0   |
| 0   | 0   | 0  | 0  | 0 | 0   | 0   |
| 0   | 0   | 0  | 0  | 0 | 0   | 0   |
| 0   | 0   | 0  | 0  | 0 | 0   | 0   |
| 0   | 0   | 0  | 0  | 0 | 0   | 0   |
| 0   | 0   | 0  | 0  | 0 | 0   | 0   |
| 0   | 0   | 0  | 0  | 0 | 0   | 0   |
| 0   | 0   | 0  | 0  | 0 | 0   | 0   |
| 0   | 0   | 0  | 0  | 0 | 0   | 0   |
| 15  | 0   | 0  | 0  | 0 | 138 | 0   |

[illegible]

|     |     |    |     |   |    |    |
|-----|-----|----|-----|---|----|----|
| 0   | 0   | 0  | 0   | 0 | 0  | 0  |
| 0   | 0   | 0  | 0   | 0 | 0  | 0  |
| 0   | 0   | 0  | 0   | 0 | 0  | 0  |
| 0   | 0   | 0  | 0   | 0 | 0  | 0  |
| 0   | 0   | 0  | 0   | 0 | 0  | 0  |
| 0   | 0   | 0  | 0   | 0 | 0  | 0  |
| 0   | 0   | 0  | 0   | 0 | 0  | 0  |
| 0   | 0   | 0  | 0   | 0 | 0  | 0  |
| 37  | 0   | 0  | 47  | 0 | 0  | 12 |
| 0   | 0   | 0  | 0   | 0 | 0  | 0  |
| 0   | 0   | 0  | 0   | 0 | 0  | 0  |
| 0   | 0   | 0  | 0   | 0 | 0  | 0  |
| 0   | 0   | 0  | 0   | 0 | 0  | 0  |
| 10  | 0   | 0  | 0   | 0 | 0  | 0  |
| 0   | 0   | 0  | 0   | 0 | 0  | 0  |
| 0   | 0   | 0  | 0   | 0 | 0  | 0  |
| 317 | 0   | 0  | 105 | 0 | 0  | 23 |
| 0   | 0   | 0  | 0   | 0 | 0  | 0  |
| 0   | 0   | 0  | 0   | 0 | 0  | 0  |
| 0   | 0   | 0  | 0   | 0 | 0  | 0  |
| 0   | 0   | 0  | 0   | 0 | 0  | 0  |
| 0   | 0   | 0  | 0   | 0 | 0  | 0  |
| 0   | 0   | 0  | 0   | 0 | 0  | 0  |
| 0   | 0   | 0  | 0   | 0 | 0  | 0  |
| 0   | 0   | 0  | 0   | 0 | 0  | 0  |
| 0   | 0   | 0  | 0   | 0 | 0  | 28 |
| 0   | 0   | 0  | 0   | 0 | 0  | 0  |
| 0   | 0   | 0  | 0   | 0 | 0  | 0  |
| 0   | 0   | 0  | 0   | 0 | 0  | 0  |
| 0   | 0   | 0  | 0   | 0 | 0  | 0  |
| 60  | 190 | 0  | 0   | 0 | 0  | 0  |
| 0   | 0   | 0  | 0   | 0 | 0  | 0  |
| 0   | 0   | 71 | 0   | 0 | 11 | 0  |
| 0   | 0   | 0  | 0   | 0 | 0  | 0  |
| 0   | 0   | 0  | 0   | 0 | 0  | 0  |
| 0   | 0   | 0  | 0   | 0 | 0  | 0  |
| 0   | 0   | 0  | 0   | 0 | 0  | 0  |
| 0   | 0   | 0  | 0   | 0 | 0  | 0  |
| 0   | 0   | 0  | 0   | 0 | 0  | 0  |
| 0   | 0   | 0  | 0   | 0 | 0  | 0  |
| 0   | 11  | 27 | 0   | 0 | 0  | 0  |
| 0   | 0   | 0  | 0   | 0 | 0  | 0  |
| 0   | 0   | 0  | 0   | 0 | 0  | 0  |
| 0   | 0   | 0  | 0   | 0 | 0  | 0  |
| 0   | 0   | 0  | 0   | 0 | 0  | 0  |
| 0   | 27  | 0  | 0   | 0 | 0  | 22 |
| 0   | 0   | 0  | 0   | 0 | 0  | 0  |



|     |     |     |    |    |    |     |
|-----|-----|-----|----|----|----|-----|
| 0   | 0   | 0   | 0  | 0  | 0  | 0   |
| 0   | 0   | 0   | 0  | 0  | 0  | 0   |
| 0   | 66  | 0   | 83 | 0  | 0  | 194 |
| 0   | 16  | 11  | 10 | 0  | 0  | 117 |
| 0   | 0   | 0   | 0  | 0  | 0  | 0   |
| 0   | 0   | 0   | 0  | 0  | 0  | 0   |
| 0   | 0   | 0   | 0  | 0  | 0  | 0   |
| 0   | 0   | 0   | 0  | 0  | 0  | 0   |
| 0   | 0   | 10  | 0  | 0  | 0  | 0   |
| 0   | 0   | 0   | 0  | 0  | 0  | 0   |
| 0   | 0   | 0   | 0  | 0  | 0  | 0   |
| 0   | 0   | 0   | 0  | 0  | 0  | 0   |
| 0   | 0   | 0   | 0  | 0  | 0  | 0   |
| 0   | 0   | 0   | 0  | 0  | 0  | 0   |
| 0   | 0   | 0   | 10 | 0  | 0  | 0   |
| 0   | 0   | 0   | 0  | 0  | 0  | 0   |
| 0   | 0   | 10  | 0  | 0  | 0  | 15  |
| 0   | 0   | 0   | 0  | 0  | 0  | 0   |
| 0   | 0   | 0   | 0  | 0  | 0  | 14  |
| 0   | 0   | 0   | 0  | 0  | 0  | 0   |
| 0   | 39  | 0   | 0  | 0  | 0  | 0   |
| 0   | 0   | 0   | 0  | 0  | 0  | 0   |
| 0   | 0   | 0   | 0  | 0  | 0  | 0   |
| 0   | 0   | 0   | 0  | 0  | 0  | 64  |
| 0   | 0   | 0   | 0  | 0  | 0  | 387 |
| 0   | 0   | 0   | 0  | 0  | 0  | 0   |
| 0   | 0   | 0   | 33 | 0  | 0  | 0   |
| 0   | 0   | 28  | 11 | 0  | 0  | 0   |
| 0   | 0   | 0   | 0  | 0  | 0  | 0   |
| 0   | 0   | 0   | 0  | 0  | 0  | 0   |
| 0   | 0   | 27  | 12 | 0  | 0  | 0   |
| 0   | 25  | 0   | 17 | 23 | 0  | 0   |
| 0   | 0   | 0   | 0  | 0  | 0  | 0   |
| 16  | 108 | 10  | 62 | 0  | 0  | 23  |
| 0   | 0   | 0   | 0  | 0  | 0  | 0   |
| 0   | 0   | 145 | 0  | 0  | 0  | 0   |
| 0   | 0   | 0   | 0  | 0  | 0  | 0   |
| 0   | 0   | 11  | 0  | 0  | 0  | 0   |
| 0   | 0   | 0   | 0  | 0  | 0  | 0   |
| 135 | 0   | 0   | 10 | 0  | 0  | 31  |
| 0   | 0   | 0   | 70 | 0  | 98 | 0   |
| 0   | 0   | 0   | 0  | 0  | 0  | 0   |
| 0   | 0   | 0   | 0  | 0  | 0  | 0   |
| 0   | 0   | 0   | 11 | 0  | 0  | 939 |
| 0   | 0   | 26  | 0  | 0  | 0  | 0   |
| 0   | 0   | 0   | 0  | 0  | 0  | 0   |
| 0   | 0   | 0   | 0  | 0  | 0  | 0   |

|     |      |       |    |    |    |    |
|-----|------|-------|----|----|----|----|
| 0   | 0    | 0     | 0  | 0  | 0  | 0  |
| 0   | 981  | 19    | 15 | 0  | 0  | 14 |
| 0   | 20   | 0     | 0  | 0  | 33 | 0  |
| 0   | 1873 | 33    | 0  | 21 | 0  | 0  |
| 0   | 0    | 0     | 0  | 12 | 0  | 0  |
| 25  | 1210 | 0     | 0  | 0  | 0  | 0  |
| 32  | 0    | 0     | 0  | 0  | 0  | 10 |
| 0   | 0    | 0     | 0  | 0  | 0  | 0  |
| 0   | 0    | 0     | 0  | 0  | 0  | 0  |
| 0   | 0    | 0     | 0  | 0  | 0  | 0  |
| 0   | 0    | 0     | 0  | 0  | 0  | 0  |
| 0   | 0    | 0     | 0  | 0  | 0  | 0  |
| 0   | 0    | 0     | 0  | 0  | 0  | 0  |
| 0   | 0    | 0     | 0  | 0  | 0  | 0  |
| 0   | 0    | 0     | 0  | 0  | 0  | 0  |
| 0   | 0    | 0     | 11 | 0  | 0  | 0  |
| 0   | 0    | 0     | 0  | 0  | 0  | 0  |
| 0   | 0    | 0     | 0  | 0  | 0  | 0  |
| 43  | 0    | 0     | 10 | 0  | 0  | 0  |
| 120 | 0    | 0     | 0  | 0  | 0  | 0  |
| 0   | 0    | 0     | 0  | 0  | 0  | 0  |
| 0   | 0    | 0     | 0  | 0  | 0  | 0  |
| 0   | 0    | 9664  | 0  | 0  | 0  | 0  |
| 0   | 0    | 18764 | 0  | 0  | 0  | 16 |
| 0   | 0    | 0     | 0  | 0  | 0  | 0  |
| 0   | 0    | 0     | 0  | 0  | 0  | 12 |
| 0   | 0    | 0     | 0  | 0  | 0  | 0  |
| 0   | 0    | 0     | 0  | 0  | 0  | 0  |
| 0   | 0    | 0     | 0  | 0  | 0  | 0  |
| 0   | 0    | 0     | 16 | 0  | 0  | 0  |
| 0   | 0    | 0     | 0  | 0  | 22 | 0  |
| 0   | 0    | 0     | 0  | 0  | 0  | 0  |
| 0   | 0    | 0     | 0  | 0  | 0  | 13 |
| 13  | 0    | 0     | 49 | 0  | 0  | 13 |
| 10  | 0    | 0     | 10 | 0  | 0  | 0  |
| 15  | 0    | 0     | 0  | 0  | 0  | 0  |
| 28  | 0    | 0     | 0  | 0  | 0  | 0  |
| 32  | 0    | 0     | 35 | 0  | 0  | 38 |
| 0   | 0    | 0     | 44 | 0  | 0  | 0  |
| 11  | 0    | 0     | 0  | 0  | 0  | 10 |
| 0   | 0    | 0     | 0  | 0  | 0  | 0  |
| 0   | 0    | 0     | 0  | 0  | 0  | 0  |
| 0   | 0    | 0     | 0  | 0  | 0  | 0  |
| 0   | 0    | 0     | 0  | 0  | 0  | 0  |
| 13  | 0    | 0     | 0  | 0  | 0  | 0  |
| 38  | 0    | 0     | 17 | 0  | 0  | 10 |

|   |     |     |     |   |    |    |
|---|-----|-----|-----|---|----|----|
| 0 | 0   | 0   | 0   | 0 | 0  | 0  |
| 0 | 0   | 0   | 0   | 0 | 0  | 0  |
| 0 | 27  | 21  | 0   | 0 | 0  | 12 |
| 0 | 33  | 21  | 24  | 0 | 0  | 40 |
| 0 | 0   | 0   | 0   | 0 | 0  | 0  |
| 0 | 0   | 0   | 0   | 0 | 0  | 0  |
| 0 | 0   | 25  | 24  | 0 | 0  | 19 |
| 0 | 0   | 23  | 0   | 0 | 0  | 0  |
| 0 | 0   | 29  | 0   | 0 | 0  | 0  |
| 0 | 0   | 0   | 0   | 0 | 0  | 0  |
| 0 | 0   | 10  | 0   | 0 | 0  | 24 |
| 0 | 0   | 0   | 0   | 0 | 0  | 0  |
| 0 | 0   | 128 | 0   | 0 | 0  | 0  |
| 0 | 0   | 0   | 0   | 0 | 0  | 0  |
| 0 | 0   | 31  | 0   | 0 | 0  | 0  |
| 0 | 0   | 11  | 0   | 0 | 0  | 0  |
| 0 | 0   | 0   | 0   | 0 | 0  | 0  |
| 0 | 0   | 0   | 0   | 0 | 0  | 0  |
| 0 | 78  | 0   | 0   | 0 | 0  | 0  |
| 0 | 50  | 0   | 0   | 0 | 0  | 0  |
| 0 | 0   | 25  | 0   | 0 | 0  | 0  |
| 0 | 0   | 0   | 0   | 0 | 0  | 0  |
| 0 | 0   | 0   | 0   | 0 | 0  | 0  |
| 0 | 0   | 0   | 0   | 0 | 0  | 0  |
| 0 | 312 | 27  | 0   | 0 | 0  | 0  |
| 0 | 0   | 0   | 0   | 0 | 0  | 0  |
| 0 | 0   | 0   | 0   | 0 | 0  | 0  |
| 0 | 0   | 0   | 0   | 0 | 0  | 0  |
| 0 | 14  | 0   | 0   | 0 | 0  | 0  |
| 0 | 0   | 0   | 18  | 0 | 0  | 0  |
| 0 | 11  | 0   | 37  | 0 | 0  | 0  |
| 0 | 0   | 0   | 11  | 0 | 11 | 0  |
| 0 | 0   | 0   | 0   | 0 | 0  | 0  |
| 0 | 0   | 19  | 0   | 0 | 0  | 0  |
| 0 | 12  | 0   | 0   | 0 | 0  | 0  |
| 0 | 0   | 0   | 0   | 0 | 0  | 0  |
| 0 | 0   | 66  | 0   | 0 | 0  | 0  |
| 0 | 0   | 12  | 10  | 0 | 0  | 24 |
| 0 | 35  | 0   | 0   | 0 | 0  | 0  |
| 0 | 0   | 0   | 0   | 0 | 0  | 16 |
| 0 | 0   | 0   | 0   | 0 | 0  | 0  |
| 0 | 119 | 0   | 0   | 0 | 0  | 0  |
| 0 | 0   | 0   | 117 | 0 | 0  | 0  |
| 0 | 0   | 0   | 57  | 0 | 0  | 0  |
| 0 | 0   | 0   | 14  | 0 | 0  | 0  |
| 0 | 40  | 0   | 0   | 0 | 0  | 0  |

|   |     |      |    |    |      |    |
|---|-----|------|----|----|------|----|
| 0 | 0   | 0    | 0  | 0  | 0    | 0  |
| 0 | 0   | 27   | 0  | 0  | 0    | 24 |
| 0 | 0   | 0    | 0  | 0  | 0    | 0  |
| 0 | 0   | 0    | 0  | 0  | 0    | 0  |
| 0 | 0   | 0    | 0  | 0  | 0    | 0  |
| 0 | 0   | 27   | 0  | 0  | 0    | 0  |
| 0 | 0   | 0    | 0  | 0  | 0    | 0  |
| 0 | 0   | 232  | 0  | 0  | 0    | 0  |
| 0 | 0   | 0    | 0  | 0  | 0    | 0  |
| 0 | 0   | 10   | 10 | 0  | 16   | 41 |
| 0 | 0   | 0    | 0  | 0  | 0    | 0  |
| 0 | 0   | 0    | 0  | 0  | 0    | 0  |
| 0 | 0   | 0    | 0  | 0  | 0    | 0  |
| 0 | 0   | 0    | 0  | 0  | 0    | 0  |
| 0 | 0   | 0    | 0  | 0  | 0    | 0  |
| 0 | 0   | 0    | 0  | 0  | 0    | 0  |
| 0 | 0   | 0    | 0  | 0  | 0    | 10 |
| 0 | 224 | 407  | 10 | 0  | 0    | 0  |
| 0 | 0   | 0    | 0  | 0  | 0    | 0  |
| 0 | 0   | 0    | 0  | 0  | 0    | 0  |
| 0 | 0   | 0    | 0  | 0  | 0    | 0  |
| 0 | 40  | 0    | 0  | 0  | 0    | 0  |
| 0 | 0   | 0    | 0  | 0  | 0    | 0  |
| 0 | 0   | 0    | 11 | 0  | 687  | 0  |
| 0 | 0   | 0    | 0  | 0  | 0    | 0  |
| 0 | 0   | 0    | 0  | 0  | 0    | 0  |
| 0 | 0   | 0    | 0  | 0  | 0    | 0  |
| 0 | 0   | 0    | 0  | 0  | 386  | 0  |
| 0 | 0   | 0    | 29 | 0  | 113  | 0  |
| 0 | 29  | 0    | 56 | 0  | 1758 | 0  |
| 0 | 0   | 23   | 0  | 0  | 0    | 0  |
| 0 | 0   | 0    | 0  | 0  | 0    | 0  |
| 0 | 0   | 0    | 0  | 0  | 0    | 0  |
| 0 | 211 | 21   | 10 | 0  | 38   | 0  |
| 0 | 45  | 0    | 0  | 0  | 0    | 0  |
| 0 | 0   | 0    | 0  | 0  | 0    | 0  |
| 0 | 0   | 0    | 0  | 0  | 0    | 0  |
| 0 | 0   | 1074 | 0  | 0  | 0    | 0  |
| 0 | 0   | 0    | 0  | 0  | 0    | 0  |
| 0 | 0   | 605  | 0  | 0  | 0    | 0  |
| 0 | 0   | 0    | 0  | 0  | 0    | 0  |
| 0 | 0   | 0    | 0  | 0  | 0    | 0  |
| 0 | 0   | 0    | 0  | 0  | 0    | 0  |
| 0 | 0   | 0    | 0  | 0  | 0    | 0  |
| 0 | 0   | 0    | 0  | 16 | 0    | 0  |
| 0 | 0   | 0    | 0  | 0  | 0    | 0  |

|     |     |     |     |   |    |     |
|-----|-----|-----|-----|---|----|-----|
| 0   | 0   | 13  | 0   | 0 | 0  | 0   |
| 0   | 0   | 0   | 0   | 0 | 0  | 0   |
| 0   | 0   | 0   | 0   | 0 | 0  | 0   |
| 0   | 0   | 0   | 0   | 0 | 0  | 0   |
| 195 | 35  | 0   | 0   | 0 | 0  | 0   |
| 268 | 0   | 0   | 148 | 0 | 14 | 0   |
| 0   | 0   | 0   | 0   | 0 | 0  | 0   |
| 0   | 0   | 0   | 0   | 0 | 0  | 0   |
| 0   | 0   | 0   | 0   | 0 | 0  | 0   |
| 0   | 0   | 0   | 0   | 0 | 0  | 0   |
| 0   | 0   | 0   | 0   | 0 | 0  | 0   |
| 0   | 0   | 0   | 0   | 0 | 0  | 0   |
| 0   | 0   | 0   | 0   | 0 | 0  | 0   |
| 11  | 0   | 14  | 0   | 0 | 0  | 0   |
| 0   | 0   | 0   | 0   | 0 | 0  | 0   |
| 0   | 0   | 0   | 0   | 0 | 0  | 0   |
| 0   | 0   | 0   | 0   | 0 | 0  | 0   |
| 0   | 0   | 0   | 0   | 0 | 0  | 0   |
| 0   | 0   | 0   | 0   | 0 | 0  | 0   |
| 0   | 0   | 0   | 51  | 0 | 0  | 0   |
| 0   | 0   | 0   | 0   | 0 | 0  | 0   |
| 0   | 0   | 0   | 0   | 0 | 0  | 0   |
| 0   | 167 | 0   | 0   | 0 | 0  | 0   |
| 16  | 0   | 0   | 0   | 0 | 0  | 0   |
| 0   | 0   | 0   | 0   | 0 | 0  | 278 |
| 0   | 0   | 0   | 0   | 0 | 0  | 0   |
| 0   | 0   | 0   | 0   | 0 | 0  | 0   |
| 0   | 0   | 101 | 0   | 0 | 0  | 0   |
| 0   | 0   | 969 | 0   | 0 | 0  | 0   |
| 0   | 0   | 0   | 0   | 0 | 0  | 0   |
| 0   | 0   | 0   | 0   | 0 | 0  | 0   |
| 0   | 0   | 13  | 0   | 0 | 0  | 13  |
| 0   | 0   | 0   | 0   | 0 | 0  | 17  |
| 0   | 0   | 0   | 0   | 0 | 0  | 0   |
| 0   | 0   | 0   | 0   | 0 | 0  | 0   |
| 0   | 0   | 0   | 0   | 0 | 0  | 0   |
| 0   | 0   | 0   | 0   | 0 | 0  | 0   |
| 0   | 0   | 0   | 0   | 0 | 0  | 0   |
| 0   | 0   | 0   | 20  | 0 | 0  | 0   |
| 12  | 0   | 0   | 0   | 0 | 0  | 0   |
| 0   | 0   | 11  | 0   | 0 | 0  | 0   |
| 0   | 0   | 0   | 0   | 0 | 0  | 0   |
| 0   | 0   | 0   | 0   | 0 | 0  | 0   |
| 0   | 0   | 0   | 0   | 0 | 0  | 0   |
| 0   | 0   | 0   | 0   | 0 | 0  | 0   |
| 0   | 0   | 0   | 0   | 0 | 0  | 0   |
| 0   | 0   | 0   | 0   | 0 | 0  | 0   |
| 0   | 0   | 12  | 0   | 0 | 0  | 0   |

|    |     |    |    |    |    |    |
|----|-----|----|----|----|----|----|
| 0  | 0   | 25 | 0  | 0  | 0  | 0  |
| 0  | 0   | 35 | 0  | 0  | 0  | 0  |
| 16 | 0   | 0  | 11 | 0  | 0  | 0  |
| 0  | 0   | 10 | 0  | 0  | 0  | 0  |
| 0  | 0   | 0  | 0  | 0  | 0  | 0  |
| 0  | 16  | 10 | 0  | 0  | 0  | 0  |
| 0  | 0   | 0  | 0  | 0  | 0  | 0  |
| 0  | 417 | 0  | 0  | 0  | 0  | 23 |
| 0  | 0   | 0  | 0  | 0  | 0  | 0  |
| 0  | 0   | 0  | 0  | 0  | 0  | 0  |
| 0  | 0   | 0  | 0  | 0  | 0  | 0  |
| 0  | 0   | 0  | 0  | 0  | 0  | 0  |
| 0  | 0   | 0  | 0  | 0  | 0  | 0  |
| 0  | 0   | 0  | 0  | 0  | 0  | 0  |
| 0  | 0   | 0  | 0  | 0  | 0  | 0  |
| 0  | 0   | 0  | 0  | 0  | 23 | 0  |
| 0  | 48  | 0  | 0  | 0  | 20 | 11 |
| 0  | 0   | 0  | 10 | 0  | 0  | 0  |
| 0  | 0   | 0  | 0  | 0  | 0  | 0  |
| 0  | 200 | 0  | 0  | 0  | 0  | 0  |
| 26 | 0   | 0  | 23 | 0  | 0  | 0  |
| 0  | 0   | 0  | 0  | 0  | 0  | 0  |
| 13 | 0   | 0  | 60 | 0  | 0  | 0  |
| 0  | 0   | 0  | 0  | 12 | 0  | 0  |
| 0  | 0   | 0  | 0  | 11 | 22 | 0  |
| 0  | 85  | 0  | 0  | 0  | 0  | 26 |
| 0  | 0   | 0  | 0  | 0  | 0  | 0  |
| 0  | 0   | 0  | 0  | 0  | 0  | 0  |
| 0  | 0   | 0  | 0  | 0  | 0  | 0  |
| 0  | 12  | 0  | 0  | 0  | 0  | 0  |
| 0  | 0   | 0  | 0  | 0  | 0  | 0  |
| 0  | 172 | 0  | 27 | 0  | 0  | 0  |
| 0  | 0   | 0  | 0  | 0  | 0  | 0  |
| 0  | 0   | 0  | 0  | 0  | 0  | 0  |
| 0  | 0   | 0  | 0  | 0  | 0  | 0  |
| 0  | 0   | 21 | 12 | 0  | 0  | 0  |
| 10 | 0   | 0  | 0  | 0  | 0  | 0  |
| 0  | 0   | 0  | 0  | 0  | 0  | 0  |
| 0  | 0   | 45 | 10 | 0  | 0  | 0  |
| 0  | 104 | 0  | 0  | 0  | 0  | 0  |
| 0  | 0   | 0  | 0  | 0  | 0  | 0  |
| 0  | 0   | 10 | 0  | 0  | 0  | 0  |
| 0  | 0   | 0  | 0  | 0  | 0  | 0  |
| 0  | 0   | 0  | 0  | 0  | 11 | 0  |
| 0  | 0   | 0  | 0  | 0  | 0  | 0  |
| 0  | 0   | 0  | 0  | 0  | 0  | 0  |
| 0  | 0   | 0  | 0  | 0  | 0  | 0  |

|    |      |    |    |   |    |     |
|----|------|----|----|---|----|-----|
| 0  | 255  | 0  | 0  | 0 | 0  | 0   |
| 0  | 28   | 0  | 0  | 0 | 0  | 0   |
| 0  | 0    | 0  | 0  | 0 | 0  | 0   |
| 0  | 0    | 0  | 0  | 0 | 0  | 0   |
| 0  | 54   | 0  | 0  | 0 | 0  | 0   |
| 0  | 0    | 0  | 0  | 0 | 0  | 0   |
| 0  | 0    | 0  | 0  | 0 | 0  | 0   |
| 0  | 0    | 0  | 0  | 0 | 0  | 0   |
| 0  | 0    | 61 | 0  | 0 | 0  | 0   |
| 0  | 61   | 0  | 69 | 0 | 16 | 0   |
| 0  | 23   | 0  | 0  | 0 | 0  | 0   |
| 0  | 0    | 0  | 0  | 0 | 0  | 0   |
| 0  | 82   | 0  | 0  | 0 | 0  | 0   |
| 0  | 0    | 0  | 0  | 0 | 0  | 39  |
| 0  | 0    | 0  | 0  | 0 | 0  | 0   |
| 0  | 0    | 0  | 0  | 0 | 0  | 11  |
| 0  | 0    | 0  | 0  | 0 | 0  | 0   |
| 0  | 77   | 0  | 0  | 0 | 0  | 0   |
| 0  | 0    | 0  | 0  | 0 | 0  | 0   |
| 0  | 31   | 0  | 0  | 0 | 0  | 0   |
| 0  | 0    | 0  | 0  | 0 | 0  | 0   |
| 0  | 0    | 0  | 0  | 0 | 0  | 0   |
| 0  | 0    | 0  | 0  | 0 | 0  | 0   |
| 0  | 0    | 0  | 0  | 0 | 0  | 0   |
| 0  | 1993 | 0  | 13 | 0 | 0  | 0   |
| 0  | 0    | 0  | 0  | 0 | 0  | 11  |
| 0  | 0    | 0  | 0  | 0 | 0  | 172 |
| 31 | 0    | 0  | 12 | 0 | 44 | 0   |
| 0  | 0    | 0  | 0  | 0 | 0  | 0   |
| 0  | 0    | 0  | 0  | 0 | 0  | 0   |
| 0  | 0    | 0  | 0  | 0 | 0  | 0   |
| 0  | 0    | 0  | 0  | 0 | 0  | 0   |
| 0  | 0    | 0  | 0  | 0 | 0  | 0   |
| 0  | 0    | 0  | 0  | 0 | 0  | 0   |
| 0  | 0    | 0  | 0  | 0 | 0  | 0   |
| 0  | 0    | 0  | 0  | 0 | 0  | 0   |
| 0  | 0    | 0  | 0  | 0 | 0  | 0   |
| 0  | 0    | 0  | 0  | 0 | 0  | 0   |
| 0  | 0    | 13 | 10 | 0 | 0  | 0   |
| 0  | 0    | 0  | 0  | 0 | 0  | 38  |
| 0  | 0    | 0  | 0  | 0 | 0  | 0   |
| 0  | 12   | 0  | 24 | 0 | 0  | 0   |
| 0  | 0    | 0  | 0  | 0 | 0  | 10  |
| 0  | 0    | 0  | 0  | 0 | 0  | 40  |
| 0  | 0    | 0  | 0  | 0 | 0  | 0   |
| 0  | 0    | 0  | 0  | 0 | 0  | 0   |
| 0  | 0    | 0  | 0  | 0 | 0  | 0   |

[illegible]



|   |    |    |     |   |    |    |
|---|----|----|-----|---|----|----|
| 0 | 0  | 0  | 0   | 0 | 0  | 0  |
| 0 | 0  | 0  | 0   | 0 | 0  | 0  |
| 0 | 0  | 0  | 0   | 0 | 0  | 0  |
| 0 | 0  | 0  | 0   | 0 | 0  | 0  |
| 0 | 0  | 0  | 0   | 0 | 0  | 0  |
| 0 | 23 | 0  | 0   | 0 | 0  | 0  |
| 0 | 0  | 0  | 0   | 0 | 0  | 0  |
| 0 | 0  | 0  | 0   | 0 | 0  | 0  |
| 0 | 0  | 0  | 0   | 0 | 0  | 0  |
| 0 | 0  | 0  | 0   | 0 | 0  | 0  |
| 0 | 0  | 0  | 0   | 0 | 0  | 0  |
| 0 | 0  | 0  | 0   | 0 | 0  | 0  |
| 0 | 0  | 0  | 0   | 0 | 0  | 0  |
| 0 | 0  | 0  | 0   | 0 | 0  | 0  |
| 0 | 0  | 0  | 0   | 0 | 0  | 0  |
| 0 | 0  | 0  | 0   | 0 | 0  | 0  |
| 0 | 0  | 0  | 0   | 0 | 0  | 0  |
| 0 | 0  | 0  | 0   | 0 | 0  | 0  |
| 0 | 0  | 0  | 0   | 0 | 0  | 0  |
| 0 | 0  | 0  | 0   | 0 | 0  | 0  |
| 0 | 0  | 0  | 0   | 0 | 0  | 0  |
| 0 | 0  | 0  | 0   | 0 | 0  | 0  |
| 0 | 0  | 0  | 0   | 0 | 0  | 0  |
| 0 | 0  | 20 | 0   | 0 | 0  | 0  |
| 0 | 0  | 47 | 0   | 0 | 14 | 48 |
| 0 | 0  | 0  | 0   | 0 | 0  | 0  |
| 0 | 0  | 0  | 0   | 0 | 0  | 0  |
| 0 | 0  | 0  | 0   | 0 | 0  | 0  |
| 0 | 0  | 0  | 0   | 0 | 0  | 0  |
| 0 | 0  | 0  | 0   | 0 | 0  | 0  |
| 0 | 0  | 0  | 0   | 0 | 0  | 0  |
| 0 | 0  | 0  | 0   | 0 | 0  | 0  |
| 0 | 0  | 0  | 0   | 0 | 0  | 0  |
| 0 | 0  | 0  | 122 | 0 | 0  | 0  |
| 0 | 0  | 0  | 0   | 0 | 0  | 0  |
| 0 | 0  | 0  | 0   | 0 | 0  | 0  |
| 0 | 0  | 0  | 0   | 0 | 0  | 0  |
| 0 | 63 | 21 | 0   | 0 | 0  | 0  |
| 0 | 0  | 0  | 0   | 0 | 0  | 0  |
| 0 | 0  | 0  | 0   | 0 | 0  | 0  |
| 0 | 0  | 0  | 0   | 0 | 0  | 28 |
| 0 | 0  | 0  | 0   | 0 | 0  | 0  |
| 0 | 0  | 0  | 0   | 0 | 0  | 0  |
| 0 | 0  | 0  | 0   | 0 | 0  | 0  |
| 0 | 0  | 0  | 0   | 0 | 0  | 0  |
| 0 | 0  | 0  | 0   | 0 | 16 | 0  |
| 0 | 0  | 0  | 0   | 0 | 0  | 0  |
| 0 | 0  | 0  | 0   | 0 | 0  | 0  |
| 0 | 0  | 0  | 0   | 0 | 0  | 0  |
| 0 | 0  | 0  | 0   | 0 | 0  | 0  |

|    |     |    |    |   |   |    |
|----|-----|----|----|---|---|----|
| 0  | 0   | 25 | 0  | 0 | 0 | 0  |
| 0  | 0   | 0  | 0  | 0 | 0 | 0  |
| 0  | 0   | 0  | 0  | 0 | 0 | 0  |
| 0  | 0   | 0  | 0  | 0 | 0 | 0  |
| 0  | 0   | 0  | 0  | 0 | 0 | 0  |
| 27 | 147 | 0  | 0  | 0 | 0 | 13 |
| 0  | 0   | 0  | 0  | 0 | 0 | 0  |
| 0  | 44  | 0  | 0  | 0 | 0 | 0  |
| 0  | 42  | 0  | 0  | 0 | 0 | 0  |
| 0  | 0   | 0  | 0  | 0 | 0 | 0  |
| 0  | 0   | 0  | 0  | 0 | 0 | 0  |
| 0  | 0   | 0  | 0  | 0 | 0 | 0  |
| 10 | 0   | 0  | 0  | 0 | 0 | 0  |
| 0  | 0   | 0  | 0  | 0 | 0 | 0  |
| 0  | 0   | 0  | 0  | 0 | 0 | 0  |
| 0  | 0   | 0  | 10 | 0 | 0 | 0  |
| 0  | 0   | 0  | 0  | 0 | 0 | 0  |
| 0  | 0   | 0  | 0  | 0 | 0 | 0  |
| 0  | 23  | 0  | 23 | 0 | 0 | 0  |
| 0  | 0   | 51 | 0  | 0 | 0 | 0  |
| 0  | 65  | 0  | 0  | 0 | 0 | 0  |
| 0  | 0   | 21 | 0  | 0 | 0 | 0  |
| 0  | 16  | 0  | 0  | 0 | 0 | 0  |
| 0  | 0   | 10 | 0  | 0 | 0 | 0  |
| 0  | 0   | 0  | 0  | 0 | 0 | 0  |
| 12 | 0   | 0  | 0  | 0 | 0 | 0  |
| 0  | 0   | 0  | 0  | 0 | 0 | 0  |
| 0  | 0   | 0  | 0  | 0 | 0 | 0  |
| 0  | 885 | 15 | 0  | 0 | 0 | 0  |
| 0  | 0   | 0  | 0  | 0 | 0 | 0  |
| 0  | 0   | 0  | 0  | 0 | 0 | 0  |
| 0  | 29  | 0  | 0  | 0 | 0 | 0  |
| 0  | 0   | 81 | 0  | 0 | 0 | 0  |
| 0  | 0   | 0  | 0  | 0 | 0 | 0  |
| 0  | 967 | 92 | 0  | 0 | 0 | 35 |
| 0  | 0   | 0  | 0  | 0 | 0 | 0  |
| 0  | 0   | 0  | 0  | 0 | 0 | 0  |
| 0  | 0   | 0  | 0  | 0 | 0 | 0  |
| 0  | 0   | 0  | 0  | 0 | 0 | 0  |
| 0  | 0   | 0  | 0  | 0 | 0 | 0  |
| 0  | 0   | 0  | 0  | 0 | 0 | 0  |
| 0  | 156 | 0  | 0  | 0 | 0 | 0  |
| 0  | 0   | 0  | 0  | 0 | 0 | 0  |
| 0  | 402 | 0  | 0  | 0 | 0 | 0  |
| 0  | 0   | 0  | 0  | 0 | 0 | 0  |
| 0  | 0   | 0  | 0  | 0 | 0 | 0  |

|    |     |     |     |   |    |     |
|----|-----|-----|-----|---|----|-----|
| 0  | 0   | 0   | 0   | 0 | 0  | 0   |
| 0  | 0   | 0   | 0   | 0 | 0  | 0   |
| 0  | 0   | 0   | 0   | 0 | 0  | 0   |
| 0  | 0   | 0   | 0   | 0 | 0  | 0   |
| 0  | 0   | 0   | 0   | 0 | 0  | 0   |
| 0  | 0   | 0   | 0   | 0 | 0  | 0   |
| 0  | 0   | 0   | 0   | 0 | 0  | 0   |
| 0  | 123 | 24  | 0   | 0 | 0  | 0   |
| 0  | 0   | 0   | 0   | 0 | 0  | 0   |
| 0  | 0   | 0   | 0   | 0 | 0  | 0   |
| 0  | 0   | 0   | 0   | 0 | 0  | 0   |
| 0  | 0   | 0   | 0   | 0 | 0  | 0   |
| 0  | 0   | 0   | 0   | 0 | 0  | 0   |
| 0  | 0   | 0   | 0   | 0 | 0  | 0   |
| 0  | 0   | 0   | 0   | 0 | 0  | 0   |
| 0  | 68  | 184 | 0   | 0 | 0  | 13  |
| 0  | 0   | 10  | 0   | 0 | 10 | 10  |
| 0  | 0   | 0   | 0   | 0 | 0  | 0   |
| 0  | 0   | 0   | 0   | 0 | 0  | 0   |
| 0  | 0   | 0   | 0   | 0 | 0  | 0   |
| 0  | 0   | 0   | 0   | 0 | 0  | 0   |
| 0  | 63  | 0   | 0   | 0 | 0  | 0   |
| 0  | 0   | 0   | 0   | 0 | 0  | 126 |
| 0  | 200 | 0   | 0   | 0 | 0  | 0   |
| 0  | 71  | 0   | 0   | 0 | 0  | 0   |
| 0  | 0   | 0   | 0   | 0 | 0  | 0   |
| 0  | 0   | 0   | 0   | 0 | 0  | 0   |
| 0  | 0   | 0   | 0   | 0 | 11 | 0   |
| 0  | 0   | 0   | 0   | 0 | 0  | 0   |
| 0  | 0   | 0   | 0   | 0 | 0  | 0   |
| 12 | 0   | 0   | 0   | 0 | 0  | 39  |
| 0  | 0   | 0   | 0   | 0 | 0  | 0   |
| 0  | 0   | 0   | 0   | 0 | 0  | 0   |
| 11 | 0   | 0   | 0   | 0 | 0  | 0   |
| 0  | 58  | 0   | 0   | 0 | 0  | 0   |
| 0  | 0   | 0   | 0   | 0 | 34 | 0   |
| 0  | 0   | 0   | 0   | 0 | 0  | 0   |
| 0  | 0   | 0   | 11  | 0 | 0  | 0   |
| 0  | 10  | 0   | 186 | 0 | 0  | 0   |
| 0  | 0   | 0   | 13  | 0 | 0  | 0   |
| 0  | 0   | 34  | 21  | 0 | 0  | 0   |
| 0  | 0   | 11  | 11  | 0 | 0  | 11  |
| 0  | 0   | 0   | 33  | 0 | 0  | 0   |
| 0  | 0   | 0   | 21  | 0 | 0  | 0   |
| 0  | 0   | 0   | 18  | 0 | 0  | 15  |
| 0  | 0   | 0   | 40  | 0 | 0  | 0   |
| 0  | 0   | 0   | 34  | 0 | 0  | 0   |

|    |      |    |     |   |    |    |
|----|------|----|-----|---|----|----|
| 0  | 0    | 0  | 10  | 0 | 0  | 0  |
| 0  | 0    | 0  | 29  | 0 | 0  | 0  |
| 0  | 104  | 0  | 16  | 0 | 0  | 0  |
| 0  | 0    | 0  | 11  | 0 | 0  | 0  |
| 0  | 0    | 69 | 27  | 0 | 0  | 0  |
| 0  | 0    | 0  | 10  | 0 | 0  | 79 |
| 0  | 0    | 0  | 29  | 0 | 0  | 0  |
| 0  | 0    | 0  | 13  | 0 | 0  | 0  |
| 0  | 0    | 10 | 11  | 0 | 0  | 0  |
| 0  | 0    | 0  | 31  | 0 | 0  | 0  |
| 0  | 0    | 10 | 12  | 0 | 0  | 0  |
| 0  | 0    | 25 | 15  | 0 | 0  | 0  |
| 0  | 0    | 0  | 135 | 0 | 0  | 0  |
| 0  | 0    | 10 | 15  | 0 | 0  | 10 |
| 0  | 10   | 0  | 11  | 0 | 0  | 0  |
| 0  | 0    | 0  | 10  | 0 | 0  | 0  |
| 0  | 0    | 60 | 10  | 0 | 0  | 10 |
| 0  | 0    | 0  | 11  | 0 | 0  | 0  |
| 0  | 0    | 0  | 12  | 0 | 0  | 0  |
| 0  | 0    | 12 | 11  | 0 | 0  | 13 |
| 0  | 0    | 0  | 11  | 0 | 12 | 0  |
| 72 | 0    | 63 | 11  | 0 | 0  | 0  |
| 0  | 0    | 10 | 14  | 0 | 0  | 0  |
| 0  | 0    | 0  | 21  | 0 | 0  | 0  |
| 0  | 397  | 0  | 78  | 0 | 0  | 0  |
| 0  | 30   | 0  | 47  | 0 | 0  | 0  |
| 0  | 0    | 0  | 26  | 0 | 0  | 0  |
| 0  | 0    | 0  | 54  | 0 | 0  | 0  |
| 0  | 0    | 0  | 32  | 0 | 0  | 0  |
| 0  | 0    | 0  | 12  | 0 | 0  | 0  |
| 0  | 0    | 0  | 12  | 0 | 0  | 0  |
| 0  | 0    | 0  | 43  | 0 | 0  | 0  |
| 0  | 94   | 0  | 55  | 0 | 0  | 0  |
| 0  | 47   | 0  | 10  | 0 | 0  | 0  |
| 0  | 1908 | 0  | 34  | 0 | 0  | 0  |
| 0  | 0    | 0  | 0   | 0 | 0  | 0  |
| 0  | 0    | 0  | 0   | 0 | 0  | 0  |
| 0  | 43   | 0  | 0   | 0 | 0  | 0  |
| 0  | 0    | 0  | 0   | 0 | 0  | 0  |
| 0  | 0    | 0  | 0   | 0 | 0  | 0  |
| 0  | 0    | 0  | 0   | 0 | 0  | 0  |
| 0  | 65   | 0  | 0   | 0 | 0  | 0  |
| 0  | 0    | 0  | 0   | 0 | 0  | 0  |
| 0  | 0    | 37 | 0   | 0 | 0  | 0  |
| 0  | 0    | 0  | 0   | 0 | 0  | 0  |
| 0  | 0    | 0  | 0   | 0 | 0  | 0  |

[illegible]

|   |     |    |   |   |   |   |
|---|-----|----|---|---|---|---|
| 0 | 0   | 0  | 0 | 0 | 0 | 0 |
| 0 | 0   | 0  | 0 | 0 | 0 | 0 |
| 0 | 38  | 0  | 0 | 0 | 0 | 0 |
| 0 | 223 | 0  | 0 | 0 | 0 | 0 |
| 0 | 0   | 0  | 0 | 0 | 0 | 0 |
| 0 | 0   | 0  | 0 | 0 | 0 | 0 |
| 0 | 0   | 0  | 0 | 0 | 0 | 0 |
| 0 | 0   | 0  | 0 | 0 | 0 | 0 |
| 0 | 0   | 0  | 0 | 0 | 0 | 0 |
| 0 | 0   | 0  | 0 | 0 | 0 | 0 |
| 0 | 0   | 0  | 0 | 0 | 0 | 0 |
| 0 | 0   | 0  | 0 | 0 | 0 | 0 |
| 0 | 0   | 0  | 0 | 0 | 0 | 0 |
| 0 | 0   | 0  | 0 | 0 | 0 | 0 |
| 0 | 0   | 0  | 0 | 0 | 0 | 0 |
| 0 | 0   | 0  | 0 | 0 | 0 | 0 |
| 0 | 0   | 0  | 0 | 0 | 0 | 0 |
| 0 | 0   | 0  | 0 | 0 | 0 | 0 |
| 0 | 0   | 0  | 0 | 0 | 0 | 0 |
| 0 | 0   | 0  | 0 | 0 | 0 | 0 |
| 0 | 0   | 0  | 0 | 0 | 0 | 0 |
| 0 | 0   | 0  | 0 | 0 | 0 | 0 |
| 0 | 16  | 0  | 0 | 0 | 0 | 0 |
| 0 | 0   | 0  | 0 | 0 | 0 | 0 |
| 0 | 0   | 0  | 0 | 0 | 0 | 0 |
| 0 | 0   | 0  | 0 | 0 | 0 | 0 |
| 0 | 30  | 0  | 0 | 0 | 0 | 0 |
| 0 | 103 | 0  | 0 | 0 | 0 | 0 |
| 0 | 0   | 0  | 0 | 0 | 0 | 0 |
| 0 | 0   | 0  | 0 | 0 | 0 | 0 |
| 0 | 0   | 0  | 0 | 0 | 0 | 0 |
| 0 | 0   | 0  | 0 | 0 | 0 | 0 |
| 0 | 0   | 0  | 0 | 0 | 0 | 0 |
| 0 | 0   | 0  | 0 | 0 | 0 | 0 |
| 0 | 0   | 0  | 0 | 0 | 0 | 0 |
| 0 | 0   | 0  | 0 | 0 | 0 | 0 |
| 0 | 0   | 0  | 0 | 0 | 0 | 0 |
| 0 | 0   | 0  | 0 | 0 | 0 | 0 |
| 0 | 0   | 0  | 0 | 0 | 0 | 0 |
| 0 | 0   | 0  | 0 | 0 | 0 | 0 |
| 0 | 0   | 0  | 0 | 0 | 0 | 0 |
| 0 | 0   | 0  | 0 | 0 | 0 | 0 |
| 0 | 0   | 0  | 0 | 0 | 0 | 0 |
| 0 | 790 | 0  | 0 | 0 | 0 | 0 |
| 0 | 0   | 0  | 0 | 0 | 0 | 0 |
| 0 | 0   | 0  | 0 | 0 | 0 | 0 |
| 0 | 98  | 0  | 0 | 0 | 0 | 0 |
| 0 | 0   | 0  | 0 | 0 | 0 | 0 |
| 0 | 0   | 0  | 0 | 0 | 0 | 0 |
| 0 | 0   | 0  | 0 | 0 | 0 | 0 |
| 0 | 0   | 0  | 0 | 0 | 0 | 0 |
| 0 | 0   | 0  | 0 | 0 | 0 | 0 |
| 0 | 0   | 25 | 0 | 0 | 0 | 0 |
| 0 | 0   | 13 | 0 | 0 | 0 | 0 |

|   |      |    |   |   |    |    |
|---|------|----|---|---|----|----|
| 0 | 0    | 0  | 0 | 0 | 0  | 0  |
| 0 | 0    | 54 | 0 | 0 | 0  | 0  |
| 0 | 0    | 0  | 0 | 0 | 0  | 0  |
| 0 | 0    | 0  | 0 | 0 | 0  | 0  |
| 0 | 0    | 0  | 0 | 0 | 0  | 0  |
| 0 | 15   | 0  | 0 | 0 | 0  | 0  |
| 0 | 1037 | 0  | 0 | 0 | 0  | 0  |
| 0 | 0    | 0  | 0 | 0 | 0  | 0  |
| 0 | 0    | 0  | 0 | 0 | 0  | 0  |
| 0 | 0    | 0  | 0 | 0 | 0  | 0  |
| 0 | 769  | 0  | 0 | 0 | 0  | 0  |
| 0 | 199  | 0  | 0 | 0 | 0  | 0  |
| 0 | 56   | 0  | 0 | 0 | 0  | 0  |
| 0 | 73   | 0  | 0 | 0 | 0  | 0  |
| 0 | 0    | 13 | 0 | 0 | 0  | 0  |
| 0 | 0    | 0  | 0 | 0 | 0  | 0  |
| 0 | 0    | 0  | 0 | 0 | 0  | 0  |
| 0 | 0    | 0  | 0 | 0 | 0  | 0  |
| 0 | 0    | 0  | 0 | 0 | 0  | 0  |
| 0 | 0    | 0  | 0 | 0 | 0  | 0  |
| 0 | 0    | 0  | 0 | 0 | 0  | 0  |
| 0 | 0    | 0  | 0 | 0 | 0  | 0  |
| 0 | 0    | 0  | 0 | 0 | 0  | 0  |
| 0 | 0    | 13 | 0 | 0 | 10 | 14 |
| 0 | 43   | 0  | 0 | 0 | 0  | 0  |
| 0 | 0    | 0  | 0 | 0 | 0  | 0  |
| 0 | 0    | 0  | 0 | 0 | 0  | 0  |
| 0 | 0    | 0  | 0 | 0 | 0  | 0  |
| 0 | 0    | 0  | 0 | 0 | 0  | 0  |
| 0 | 0    | 0  | 0 | 0 | 0  | 0  |
| 0 | 15   | 0  | 0 | 0 | 0  | 0  |
| 0 | 0    | 0  | 0 | 0 | 0  | 0  |
| 0 | 0    | 0  | 0 | 0 | 0  | 0  |
| 0 | 0    | 0  | 0 | 0 | 0  | 0  |
| 0 | 11   | 0  | 0 | 0 | 0  | 0  |
| 0 | 0    | 0  | 0 | 0 | 0  | 0  |
| 0 | 0    | 0  | 0 | 0 | 0  | 0  |
| 0 | 0    | 0  | 0 | 0 | 0  | 0  |
| 0 | 0    | 0  | 0 | 0 | 0  | 11 |
| 0 | 0    | 0  | 0 | 0 | 0  | 0  |
| 0 | 0    | 0  | 0 | 0 | 0  | 0  |
| 0 | 105  | 0  | 0 | 0 | 0  | 0  |
| 0 | 0    | 0  | 0 | 0 | 0  | 0  |
| 0 | 0    | 0  | 0 | 0 | 0  | 0  |
| 0 | 0    | 0  | 0 | 0 | 0  | 0  |
| 0 | 0    | 0  | 0 | 0 | 0  | 0  |

[illegible]



[illegible]

|    |    |    |   |   |   |     |
|----|----|----|---|---|---|-----|
| 0  | 0  | 0  | 0 | 0 | 0 | 0   |
| 0  | 0  | 0  | 0 | 0 | 0 | 0   |
| 0  | 0  | 0  | 0 | 0 | 0 | 0   |
| 0  | 0  | 0  | 0 | 0 | 0 | 0   |
| 0  | 0  | 0  | 0 | 0 | 0 | 0   |
| 0  | 0  | 0  | 0 | 0 | 0 | 0   |
| 0  | 28 | 0  | 0 | 0 | 0 | 0   |
| 0  | 11 | 0  | 0 | 0 | 0 | 36  |
| 0  | 0  | 0  | 0 | 0 | 0 | 0   |
| 0  | 0  | 0  | 0 | 0 | 0 | 0   |
| 0  | 0  | 19 | 0 | 0 | 0 | 10  |
| 0  | 0  | 0  | 0 | 0 | 0 | 0   |
| 0  | 15 | 0  | 0 | 0 | 0 | 0   |
| 0  | 0  | 28 | 0 | 0 | 0 | 0   |
| 0  | 0  | 32 | 0 | 0 | 0 | 11  |
| 0  | 0  | 0  | 0 | 0 | 0 | 0   |
| 0  | 0  | 0  | 0 | 0 | 0 | 0   |
| 0  | 0  | 0  | 0 | 0 | 0 | 0   |
| 0  | 0  | 0  | 0 | 0 | 0 | 0   |
| 0  | 0  | 0  | 0 | 0 | 0 | 0   |
| 0  | 0  | 0  | 0 | 0 | 0 | 0   |
| 0  | 0  | 35 | 0 | 0 | 0 | 36  |
| 0  | 0  | 0  | 0 | 0 | 0 | 0   |
| 0  | 0  | 0  | 0 | 0 | 0 | 0   |
| 0  | 0  | 0  | 0 | 0 | 0 | 0   |
| 0  | 0  | 10 | 0 | 0 | 0 | 0   |
| 0  | 0  | 0  | 0 | 0 | 0 | 0   |
| 0  | 0  | 0  | 0 | 0 | 0 | 0   |
| 0  | 0  | 0  | 0 | 0 | 0 | 12  |
| 0  | 0  | 0  | 0 | 0 | 0 | 0   |
| 0  | 0  | 0  | 0 | 0 | 0 | 0   |
| 0  | 0  | 0  | 0 | 0 | 0 | 0   |
| 0  | 0  | 0  | 0 | 0 | 0 | 0   |
| 0  | 0  | 0  | 0 | 0 | 0 | 345 |
| 0  | 0  | 0  | 0 | 0 | 0 | 0   |
| 0  | 0  | 0  | 0 | 0 | 0 | 0   |
| 0  | 0  | 0  | 0 | 0 | 0 | 0   |
| 0  | 0  | 0  | 0 | 0 | 0 | 0   |
| 0  | 0  | 0  | 0 | 0 | 0 | 0   |
| 0  | 0  | 0  | 0 | 0 | 0 | 0   |
| 0  | 0  | 0  | 0 | 0 | 0 | 0   |
| 24 | 0  | 0  | 0 | 0 | 0 | 0   |
| 0  | 0  | 0  | 0 | 0 | 0 | 0   |
| 0  | 0  | 0  | 0 | 0 | 0 | 0   |
| 0  | 0  | 0  | 0 | 0 | 0 | 10  |
| 0  | 0  | 0  | 0 | 0 | 0 | 0   |
| 0  | 0  | 27 | 0 | 0 | 0 | 0   |

[illegible]

|   |    |     |   |   |   |     |
|---|----|-----|---|---|---|-----|
| 0 | 0  | 97  | 0 | 0 | 0 | 0   |
| 0 | 0  | 0   | 0 | 0 | 0 | 0   |
| 0 | 0  | 0   | 0 | 0 | 0 | 0   |
| 0 | 0  | 0   | 0 | 0 | 0 | 0   |
| 0 | 0  | 0   | 0 | 0 | 0 | 0   |
| 0 | 0  | 0   | 0 | 0 | 0 | 0   |
| 0 | 0  | 36  | 0 | 0 | 0 | 0   |
| 0 | 0  | 0   | 0 | 0 | 0 | 10  |
| 0 | 0  | 0   | 0 | 0 | 0 | 0   |
| 0 | 0  | 0   | 0 | 0 | 0 | 0   |
| 0 | 0  | 0   | 0 | 0 | 0 | 0   |
| 0 | 0  | 64  | 0 | 0 | 0 | 0   |
| 0 | 0  | 60  | 0 | 0 | 0 | 0   |
| 0 | 0  | 27  | 0 | 0 | 0 | 0   |
| 0 | 0  | 284 | 0 | 0 | 0 | 0   |
| 0 | 0  | 13  | 0 | 0 | 0 | 0   |
| 0 | 0  | 0   | 0 | 0 | 0 | 0   |
| 0 | 13 | 0   | 0 | 0 | 0 | 0   |
| 0 | 33 | 10  | 0 | 0 | 0 | 0   |
| 0 | 0  | 0   | 0 | 0 | 0 | 0   |
| 0 | 14 | 0   | 0 | 0 | 0 | 0   |
| 0 | 0  | 0   | 0 | 0 | 0 | 0   |
| 0 | 48 | 0   | 0 | 0 | 0 | 0   |
| 0 | 0  | 10  | 0 | 0 | 0 | 0   |
| 0 | 0  | 10  | 0 | 0 | 0 | 0   |
| 0 | 0  | 0   | 0 | 0 | 0 | 0   |
| 0 | 0  | 0   | 0 | 0 | 0 | 123 |
| 0 | 0  | 0   | 0 | 0 | 0 | 0   |
| 0 | 0  | 0   | 0 | 0 | 0 | 0   |
| 0 | 0  | 0   | 0 | 0 | 0 | 0   |
| 0 | 0  | 0   | 0 | 0 | 0 | 0   |
| 0 | 0  | 0   | 0 | 0 | 0 | 0   |
| 0 | 0  | 0   | 0 | 0 | 0 | 0   |
| 0 | 0  | 0   | 0 | 0 | 0 | 0   |
| 0 | 0  | 0   | 0 | 0 | 0 | 0   |
| 0 | 0  | 0   | 0 | 0 | 0 | 0   |
| 0 | 0  | 0   | 0 | 0 | 0 | 0   |
| 0 | 0  | 0   | 0 | 0 | 0 | 0   |
| 0 | 32 | 0   | 0 | 0 | 0 | 0   |
| 0 | 0  | 0   | 0 | 0 | 0 | 0   |
| 0 | 0  | 0   | 0 | 0 | 0 | 0   |
| 0 | 0  | 0   | 0 | 0 | 0 | 11  |
| 0 | 0  | 0   | 0 | 0 | 0 | 45  |
| 0 | 0  | 0   | 0 | 0 | 0 | 120 |
| 0 | 0  | 0   | 0 | 0 | 0 | 10  |
| 0 | 0  | 0   | 0 | 0 | 0 | 12  |
| 0 | 0  | 0   | 0 | 0 | 0 | 48  |
| 0 | 0  | 0   | 0 | 0 | 0 | 42  |

|   |     |    |   |   |   |     |
|---|-----|----|---|---|---|-----|
| 0 | 0   | 0  | 0 | 0 | 0 | 11  |
| 0 | 0   | 0  | 0 | 0 | 0 | 97  |
| 0 | 0   | 0  | 0 | 0 | 0 | 110 |
| 0 | 0   | 0  | 0 | 0 | 0 | 11  |
| 0 | 0   | 0  | 0 | 0 | 0 | 10  |
| 0 | 0   | 0  | 0 | 0 | 0 | 87  |
| 0 | 0   | 0  | 0 | 0 | 0 | 72  |
| 0 | 0   | 0  | 0 | 0 | 0 | 11  |
| 0 | 0   | 0  | 0 | 0 | 0 | 11  |
| 0 | 0   | 0  | 0 | 0 | 0 | 58  |
| 0 | 51  | 0  | 0 | 0 | 0 | 11  |
| 0 | 0   | 0  | 0 | 0 | 0 | 85  |
| 0 | 0   | 0  | 0 | 0 | 0 | 12  |
| 0 | 0   | 0  | 0 | 0 | 0 | 62  |
| 0 | 0   | 0  | 0 | 0 | 0 | 170 |
| 0 | 0   | 0  | 0 | 0 | 0 | 15  |
| 0 | 0   | 0  | 0 | 0 | 0 | 10  |
| 0 | 0   | 0  | 0 | 0 | 0 | 12  |
| 0 | 0   | 0  | 0 | 0 | 0 | 10  |
| 0 | 14  | 0  | 0 | 0 | 0 | 0   |
| 0 | 18  | 0  | 0 | 0 | 0 | 0   |
| 0 | 51  | 0  | 0 | 0 | 0 | 0   |
| 0 | 10  | 0  | 0 | 0 | 0 | 0   |
| 0 | 52  | 0  | 0 | 0 | 0 | 0   |
| 0 | 354 | 0  | 0 | 0 | 0 | 0   |
| 0 | 14  | 0  | 0 | 0 | 0 | 0   |
| 0 | 202 | 0  | 0 | 0 | 0 | 0   |
| 0 | 28  | 0  | 0 | 0 | 0 | 0   |
| 0 | 29  | 0  | 0 | 0 | 0 | 0   |
| 0 | 11  | 0  | 0 | 0 | 0 | 0   |
| 0 | 11  | 0  | 0 | 0 | 0 | 0   |
| 0 | 141 | 0  | 0 | 0 | 0 | 0   |
| 0 | 40  | 0  | 0 | 0 | 0 | 0   |
| 0 | 113 | 0  | 0 | 0 | 0 | 0   |
| 0 | 55  | 0  | 0 | 0 | 0 | 0   |
| 0 | 10  | 0  | 0 | 0 | 0 | 0   |
| 0 | 14  | 0  | 0 | 0 | 0 | 0   |
| 0 | 11  | 0  | 0 | 0 | 0 | 0   |
| 0 | 16  | 13 | 0 | 0 | 0 | 0   |
| 0 | 12  | 0  | 0 | 0 | 0 | 0   |
| 0 | 22  | 0  | 0 | 0 | 0 | 0   |
| 0 | 45  | 0  | 0 | 0 | 0 | 0   |
| 0 | 14  | 0  | 0 | 0 | 0 | 0   |
| 0 | 65  | 0  | 0 | 0 | 0 | 0   |
| 0 | 31  | 0  | 0 | 0 | 0 | 0   |
| 0 | 48  | 0  | 0 | 0 | 0 | 0   |

|   |     |    |   |   |   |   |
|---|-----|----|---|---|---|---|
| 0 | 10  | 0  | 0 | 0 | 0 | 0 |
| 0 | 10  | 0  | 0 | 0 | 0 | 0 |
| 0 | 47  | 0  | 0 | 0 | 0 | 0 |
| 0 | 32  | 0  | 0 | 0 | 0 | 0 |
| 0 | 12  | 0  | 0 | 0 | 0 | 0 |
| 0 | 34  | 0  | 0 | 0 | 0 | 0 |
| 0 | 12  | 0  | 0 | 0 | 0 | 0 |
| 0 | 68  | 0  | 0 | 0 | 0 | 0 |
| 0 | 27  | 0  | 0 | 0 | 0 | 0 |
| 0 | 27  | 0  | 0 | 0 | 0 | 0 |
| 0 | 37  | 0  | 0 | 0 | 0 | 0 |
| 0 | 25  | 0  | 0 | 0 | 0 | 0 |
| 0 | 13  | 0  | 0 | 0 | 0 | 0 |
| 0 | 59  | 0  | 0 | 0 | 0 | 0 |
| 0 | 212 | 0  | 0 | 0 | 0 | 0 |
| 0 | 25  | 0  | 0 | 0 | 0 | 0 |
| 0 | 12  | 0  | 0 | 0 | 0 | 0 |
| 0 | 46  | 0  | 0 | 0 | 0 | 0 |
| 0 | 11  | 0  | 0 | 0 | 0 | 0 |
| 0 | 45  | 0  | 0 | 0 | 0 | 0 |
| 0 | 11  | 0  | 0 | 0 | 0 | 0 |
| 0 | 207 | 0  | 0 | 0 | 0 | 0 |
| 0 | 41  | 0  | 0 | 0 | 0 | 0 |
| 0 | 71  | 0  | 0 | 0 | 0 | 0 |
| 0 | 43  | 0  | 0 | 0 | 0 | 0 |
| 0 | 0   | 0  | 0 | 0 | 0 | 0 |
| 0 | 0   | 0  | 0 | 0 | 0 | 0 |
| 0 | 0   | 0  | 0 | 0 | 0 | 0 |
| 0 | 0   | 0  | 0 | 0 | 0 | 0 |
| 0 | 0   | 0  | 0 | 0 | 0 | 0 |
| 0 | 0   | 0  | 0 | 0 | 0 | 0 |
| 0 | 0   | 0  | 0 | 0 | 0 | 0 |
| 0 | 0   | 0  | 0 | 0 | 0 | 0 |
| 0 | 0   | 0  | 0 | 0 | 0 | 0 |
| 0 | 0   | 0  | 0 | 0 | 0 | 0 |
| 0 | 0   | 0  | 0 | 0 | 0 | 0 |
| 0 | 0   | 0  | 0 | 0 | 0 | 0 |
| 0 | 0   | 0  | 0 | 0 | 0 | 0 |
| 0 | 0   | 10 | 0 | 0 | 0 | 0 |
| 0 | 0   | 0  | 0 | 0 | 0 | 0 |
| 0 | 0   | 0  | 0 | 0 | 0 | 0 |
| 0 | 0   | 0  | 0 | 0 | 0 | 0 |
| 0 | 0   | 0  | 0 | 0 | 0 | 0 |
| 0 | 0   | 14 | 0 | 0 | 0 | 0 |
| 0 | 0   | 0  | 0 | 0 | 0 | 0 |
| 0 | 0   | 0  | 0 | 0 | 0 | 0 |
| 0 | 0   | 0  | 0 | 0 | 0 | 0 |
| 0 | 0   | 0  | 0 | 0 | 0 | 0 |



[illegible]



[illegible]

| CS_324 | CS_329 | CS_332 | CS_333 | CS_340 | CS_341 | CS_348 |
|--------|--------|--------|--------|--------|--------|--------|
| 0      | 0      | 0      | 61     | 0      | 0      | 0      |
| 0      | 0      | 0      | 11     | 0      | 0      | 0      |
| 0      | 12     | 38     | 12     | 64     | 12     | 93     |
| 0      | 0      | 0      | 13     | 40     | 28     | 338    |
| 0      | 0      | 0      | 31     | 0      | 12     | 240    |
| 0      | 0      | 0      | 17     | 0      | 0      | 48     |
| 0      | 0      | 0      | 12     | 0      | 13     | 33     |
| 0      | 0      | 0      | 0      | 28     | 0      | 0      |
| 0      | 0      | 0      | 36     | 74     | 10     | 0      |
| 10     | 0      | 16     | 82     | 90     | 106    | 173    |
| 0      | 0      | 0      | 0      | 79     | 0      | 0      |
| 0      | 0      | 0      | 0      | 0      | 0      | 0      |
| 0      | 0      | 0      | 24     | 0      | 0      | 0      |
| 0      | 21     | 0      | 0      | 0      | 0      | 0      |
| 0      | 14     | 0      | 0      | 0      | 53     | 0      |
| 0      | 0      | 0      | 0      | 10     | 0      | 16     |
| 478    | 158    | 14     | 973    | 353    | 2639   | 953    |
| 0      | 14     | 28     | 0      | 13     | 167    | 247    |
| 0      | 0      | 0      | 36     | 27     | 21     | 0      |
| 0      | 130    | 0      | 108    | 145    | 41     | 202    |
| 0      | 0      | 0      | 58     | 0      | 0      | 12     |
| 0      | 0      | 0      | 58     | 11     | 0      | 54     |
| 0      | 0      | 0      | 57     | 0      | 0      | 270    |
| 0      | 0      | 0      | 0      | 0      | 0      | 0      |
| 702    | 571    | 345    | 1101   | 2468   | 432    | 10130  |
| 98     | 20     | 66     | 274    | 1160   | 70     | 498    |
| 117    | 35     | 0      | 299    | 1583   | 248    | 377    |
| 13     | 13     | 0      | 71     | 882    | 57     | 271    |
| 41     | 66     | 12     | 336    | 2625   | 186    | 1186   |
| 0      | 0      | 0      | 29     | 30     | 0      | 0      |
| 0      | 0      | 0      | 46     | 32     | 0      | 11     |
| 0      | 0      | 0      | 45     | 672    | 0      | 0      |
| 597    | 0      | 0      | 1022   | 4833   | 1406   | 146    |
| 0      | 0      | 0      | 0      | 0      | 0      | 0      |
| 0      | 0      | 0      | 23     | 0      | 12     | 250    |
| 0      | 0      | 0      | 23     | 0      | 0      | 0      |
| 0      | 0      | 0      | 44     | 0      | 0      | 23     |
| 179    | 57     | 38     | 775    | 152    | 199    | 169    |
| 0      | 13     | 81     | 24     | 51     | 181    | 86     |
| 2095   | 129    | 211    | 2177   | 3740   | 1889   | 697    |
| 43     | 0      | 0      | 123    | 223    | 87     | 0      |

|     |      |     |      |      |      |      |
|-----|------|-----|------|------|------|------|
| 77  | 0    | 0   | 87   | 232  | 149  | 0    |
| 20  | 0    | 0   | 220  | 345  | 141  | 96   |
| 0   | 0    | 0   | 355  | 203  | 243  | 131  |
| 795 | 1379 | 948 | 448  | 1294 | 1184 | 2209 |
| 100 | 577  | 96  | 440  | 93   | 857  | 790  |
| 0   | 0    | 0   | 0    | 108  | 0    | 0    |
| 0   | 59   | 73  | 115  | 13   | 0    | 43   |
| 0   | 0    | 0   | 0    | 186  | 0    | 0    |
| 0   | 0    | 0   | 14   | 63   | 0    | 0    |
| 0   | 0    | 0   | 0    | 90   | 0    | 0    |
| 0   | 0    | 0   | 0    | 0    | 0    | 0    |
| 0   | 0    | 0   | 0    | 54   | 0    | 0    |
| 94  | 24   | 55  | 68   | 162  | 38   | 0    |
| 0   | 0    | 0   | 0    | 41   | 0    | 0    |
| 0   | 0    | 0   | 0    | 20   | 0    | 0    |
| 0   | 0    | 0   | 0    | 259  | 0    | 0    |
| 0   | 0    | 0   | 0    | 18   | 0    | 0    |
| 229 | 86   | 58  | 1264 | 1089 | 165  | 1501 |
| 56  | 99   | 79  | 364  | 147  | 54   | 826  |
| 0   | 0    | 0   | 81   | 10   | 0    | 0    |
| 0   | 0    | 0   | 29   | 88   | 0    | 0    |
| 0   | 0    | 0   | 0    | 0    | 0    | 0    |
| 0   | 0    | 0   | 0    | 0    | 0    | 0    |
| 0   | 0    | 33  | 10   | 0    | 26   | 10   |
| 0   | 0    | 0   | 0    | 28   | 0    | 0    |
| 0   | 0    | 0   | 0    | 0    | 0    | 0    |
| 0   | 0    | 0   | 0    | 28   | 0    | 0    |
| 0   | 0    | 0   | 0    | 0    | 0    | 0    |
| 0   | 0    | 0   | 0    | 0    | 0    | 0    |
| 0   | 0    | 45  | 30   | 26   | 12   | 80   |
| 0   | 0    | 0   | 13   | 592  | 25   | 0    |
| 285 | 260  | 348 | 589  | 866  | 624  | 404  |
| 10  | 0    | 12  | 114  | 13   | 27   | 37   |
| 0   | 0    | 0   | 0    | 47   | 0    | 0    |
| 0   | 0    | 0   | 0    | 39   | 0    | 0    |
| 0   | 0    | 0   | 0    | 40   | 0    | 0    |
| 0   | 0    | 0   | 0    | 55   | 0    | 0    |
| 0   | 0    | 0   | 0    | 70   | 0    | 0    |
| 0   | 0    | 0   | 0    | 0    | 0    | 0    |
| 0   | 0    | 0   | 0    | 38   | 0    | 0    |
| 0   | 0    | 0   | 0    | 388  | 10   | 0    |
| 0   | 0    | 0   | 31   | 10   | 24   | 0    |
| 0   | 0    | 0   | 0    | 0    | 0    | 0    |
| 0   | 0    | 0   | 0    | 0    | 0    | 0    |
| 0   | 0    | 0   | 27   | 371  | 19   | 0    |
| 93  | 265  | 174 | 308  | 1595 | 242  | 150  |

|      |      |      |      |      |      |       |
|------|------|------|------|------|------|-------|
| 0    | 0    | 0    | 11   | 22   | 0    | 0     |
| 19   | 48   | 84   | 142  | 55   | 128  | 250   |
| 0    | 0    | 0    | 10   | 21   | 14   | 0     |
| 0    | 0    | 0    | 0    | 49   | 0    | 0     |
| 124  | 249  | 123  | 108  | 1003 | 290  | 135   |
| 0    | 0    | 0    | 55   | 0    | 57   | 10    |
| 0    | 0    | 0    | 11   | 0    | 0    | 0     |
| 0    | 0    | 0    | 10   | 0    | 0    | 0     |
| 0    | 0    | 0    | 0    | 0    | 0    | 0     |
| 0    | 0    | 0    | 0    | 0    | 0    | 0     |
| 37   | 0    | 10   | 118  | 0    | 65   | 78    |
| 0    | 0    | 0    | 51   | 38   | 0    | 0     |
| 753  | 635  | 590  | 7985 | 2571 | 1976 | 6643  |
| 0    | 0    | 0    | 0    | 0    | 0    | 0     |
| 42   | 82   | 59   | 947  | 366  | 225  | 504   |
| 0    | 0    | 0    | 0    | 74   | 13   | 24    |
| 0    | 0    | 0    | 113  | 51   | 38   | 49    |
| 0    | 0    | 0    | 0    | 302  | 12   | 0     |
| 0    | 0    | 0    | 43   | 13   | 0    | 55    |
| 0    | 0    | 0    | 0    | 96   | 0    | 0     |
| 0    | 0    | 0    | 0    | 14   | 0    | 0     |
| 0    | 0    | 0    | 0    | 10   | 0    | 0     |
| 0    | 27   | 0    | 0    | 0    | 15   | 73    |
| 0    | 0    | 0    | 333  | 108  | 27   | 0     |
| 0    | 0    | 0    | 283  | 360  | 135  | 82    |
| 0    | 0    | 0    | 529  | 178  | 64   | 74    |
| 0    | 0    | 0    | 311  | 100  | 27   | 59    |
| 0    | 0    | 0    | 16   | 74   | 0    | 32    |
| 10   | 0    | 0    | 41   | 98   | 19   | 66    |
| 40   | 167  | 0    | 1203 | 517  | 367  | 970   |
| 0    | 0    | 0    | 71   | 24   | 12   | 191   |
| 0    | 0    | 0    | 86   | 0    | 0    | 0     |
| 0    | 80   | 0    | 11   | 0    | 116  | 97    |
| 0    | 72   | 41   | 120  | 13   | 202  | 608   |
| 0    | 0    | 0    | 0    | 26   | 0    | 0     |
| 0    | 0    | 0    | 42   | 10   | 0    | 0     |
| 0    | 0    | 0    | 119  | 31   | 14   | 11    |
| 0    | 0    | 0    | 154  | 48   | 21   | 33    |
| 0    | 0    | 0    | 0    | 73   | 0    | 0     |
| 21   | 0    | 0    | 1148 | 450  | 139  | 217   |
| 0    | 0    | 0    | 54   | 40   | 0    | 10    |
| 12   | 0    | 0    | 114  | 0    | 0    | 25    |
| 0    | 0    | 0    | 34   | 93   | 0    | 16    |
| 1804 | 1912 | 1338 | 3429 | 2215 | 1377 | 28772 |
| 0    | 0    | 0    | 56   | 171  | 0    | 329   |
| 124  | 0    | 62   | 448  | 1500 | 135  | 1583  |

|     |     |     |     |     |     |      |
|-----|-----|-----|-----|-----|-----|------|
| 0   | 0   | 0   | 26  | 0   | 0   | 10   |
| 32  | 0   | 0   | 518 | 204 | 10  | 55   |
| 93  | 10  | 0   | 451 | 311 | 60  | 160  |
| 997 | 134 | 370 | 650 | 982 | 459 | 159  |
| 0   | 0   | 0   | 11  | 66  | 0   | 0    |
| 271 | 35  | 104 | 130 | 68  | 54  | 38   |
| 0   | 0   | 0   | 0   | 0   | 0   | 0    |
| 0   | 0   | 0   | 0   | 26  | 13  | 0    |
| 0   | 0   | 0   | 0   | 24  | 0   | 0    |
| 0   | 0   | 0   | 0   | 0   | 0   | 0    |
| 53  | 0   | 0   | 40  | 63  | 27  | 79   |
| 0   | 46  | 10  | 194 | 11  | 0   | 271  |
| 0   | 0   | 0   | 0   | 76  | 0   | 0    |
| 0   | 0   | 0   | 55  | 519 | 0   | 0    |
| 0   | 0   | 0   | 321 | 719 | 0   | 0    |
| 0   | 0   | 0   | 0   | 0   | 0   | 0    |
| 0   | 0   | 0   | 30  | 31  | 0   | 11   |
| 0   | 0   | 0   | 0   | 0   | 0   | 0    |
| 0   | 0   | 0   | 0   | 0   | 0   | 0    |
| 0   | 0   | 0   | 0   | 0   | 0   | 0    |
| 53  | 0   | 0   | 146 | 37  | 91  | 64   |
| 0   | 0   | 0   | 0   | 0   | 0   | 0    |
| 32  | 0   | 0   | 365 | 162 | 75  | 326  |
| 0   | 0   | 0   | 0   | 0   | 0   | 0    |
| 0   | 0   | 0   | 62  | 36  | 10  | 0    |
| 0   | 0   | 0   | 71  | 412 | 33  | 54   |
| 51  | 0   | 29  | 349 | 45  | 85  | 159  |
| 160 | 69  | 64  | 745 | 343 | 449 | 906  |
| 0   | 41  | 15  | 42  | 0   | 27  | 98   |
| 0   | 0   | 0   | 24  | 119 | 15  | 29   |
| 12  | 0   | 0   | 0   | 0   | 0   | 14   |
| 80  | 23  | 11  | 190 | 14  | 25  | 387  |
| 20  | 0   | 51  | 127 | 359 | 0   | 183  |
| 0   | 0   | 0   | 33  | 0   | 16  | 60   |
| 54  | 25  | 0   | 228 | 522 | 11  | 287  |
| 0   | 0   | 0   | 122 | 213 | 12  | 38   |
| 0   | 0   | 0   | 0   | 214 | 14  | 0    |
| 0   | 0   | 0   | 0   | 0   | 0   | 0    |
| 0   | 0   | 0   | 20  | 0   | 0   | 0    |
| 0   | 0   | 0   | 0   | 21  | 0   | 0    |
| 0   | 0   | 0   | 238 | 0   | 54  | 0    |
| 0   | 0   | 0   | 0   | 13  | 0   | 0    |
| 0   | 0   | 0   | 0   | 75  | 0   | 0    |
| 0   | 0   | 0   | 0   | 0   | 0   | 0    |
| 0   | 34  | 0   | 57  | 11  | 22  | 180  |
| 12  | 0   | 0   | 54  | 0   | 258 | 2116 |

|     |     |     |      |      |      |       |
|-----|-----|-----|------|------|------|-------|
| 0   | 0   | 0   | 47   | 0    | 70   | 812   |
| 0   | 0   | 10  | 71   | 0    | 76   | 1274  |
| 107 | 113 | 768 | 582  | 200  | 976  | 33269 |
| 23  | 0   | 142 | 797  | 14   | 1962 | 6270  |
| 0   | 0   | 12  | 0    | 71   | 0    | 0     |
| 50  | 320 | 0   | 125  | 184  | 20   | 603   |
| 21  | 78  | 102 | 238  | 125  | 151  | 178   |
| 0   | 0   | 0   | 0    | 0    | 0    | 0     |
| 0   | 0   | 0   | 0    | 0    | 0    | 0     |
| 0   | 0   | 0   | 0    | 0    | 0    | 0     |
| 0   | 0   | 0   | 0    | 0    | 0    | 0     |
| 0   | 0   | 0   | 0    | 0    | 0    | 0     |
| 0   | 72  | 0   | 0    | 0    | 0    | 228   |
| 135 | 393 | 181 | 630  | 119  | 871  | 2319  |
| 0   | 0   | 0   | 0    | 0    | 45   | 315   |
| 47  | 103 | 26  | 26   | 341  | 201  | 11    |
| 0   | 0   | 0   | 0    | 0    | 0    | 10    |
| 0   | 0   | 0   | 10   | 0    | 0    | 180   |
| 0   | 0   | 0   | 0    | 0    | 0    | 0     |
| 0   | 0   | 0   | 0    | 0    | 0    | 0     |
| 0   | 0   | 0   | 0    | 0    | 0    | 0     |
| 96  | 0   | 0   | 621  | 134  | 0    | 466   |
| 0   | 0   | 0   | 0    | 125  | 0    | 12    |
| 0   | 0   | 0   | 0    | 0    | 0    | 0     |
| 0   | 0   | 0   | 0    | 53   | 0    | 26    |
| 0   | 0   | 0   | 69   | 52   | 10   | 69    |
| 0   | 0   | 0   | 58   | 823  | 0    | 38    |
| 0   | 0   | 0   | 0    | 0    | 0    | 0     |
| 0   | 0   | 0   | 0    | 0    | 0    | 0     |
| 0   | 0   | 0   | 0    | 0    | 0    | 0     |
| 0   | 0   | 0   | 0    | 0    | 0    | 0     |
| 0   | 0   | 0   | 0    | 11   | 0    | 0     |
| 0   | 0   | 0   | 0    | 11   | 0    | 0     |
| 0   | 0   | 0   | 0    | 0    | 0    | 0     |
| 0   | 0   | 0   | 0    | 0    | 0    | 0     |
| 88  | 16  | 0   | 72   | 619  | 10   | 46    |
| 789 | 380 | 85  | 4132 | 8476 | 368  | 1268  |
| 241 | 238 | 14  | 2104 | 5585 | 221  | 1204  |
| 0   | 0   | 0   | 131  | 166  | 0    | 43    |
| 0   | 0   | 0   | 0    | 0    | 0    | 0     |
| 0   | 0   | 0   | 30   | 0    | 0    | 34    |
| 60  | 172 | 234 | 168  | 1084 | 74   | 102   |
| 21  | 0   | 0   | 464  | 682  | 63   | 68    |
| 0   | 0   | 0   | 65   | 43   | 14   | 0     |
| 0   | 0   | 0   | 0    | 137  | 0    | 0     |
| 43  | 199 | 128 | 31   | 489  | 69   | 25    |

|     |      |      |      |      |     |      |
|-----|------|------|------|------|-----|------|
| 12  | 75   | 41   | 0    | 269  | 22  | 0    |
| 0   | 98   | 110  | 29   | 1776 | 24  | 13   |
| 0   | 40   | 11   | 37   | 486  | 10  | 628  |
| 0   | 0    | 0    | 32   | 0    | 0   | 0    |
| 0   | 0    | 0    | 246  | 47   | 33  | 0    |
| 315 | 60   | 36   | 2676 | 3890 | 210 | 223  |
| 0   | 0    | 29   | 260  | 232  | 51  | 106  |
| 0   | 0    | 0    | 62   | 96   | 0   | 0    |
| 0   | 0    | 0    | 0    | 0    | 27  | 0    |
| 0   | 0    | 0    | 0    | 0    | 0   | 0    |
| 0   | 0    | 0    | 0    | 819  | 0   | 0    |
| 0   | 0    | 0    | 0    | 0    | 0   | 0    |
| 0   | 0    | 22   | 0    | 0    | 0   | 0    |
| 0   | 0    | 0    | 478  | 365  | 116 | 158  |
| 0   | 0    | 0    | 0    | 0    | 47  | 10   |
| 0   | 0    | 0    | 0    | 0    | 0   | 0    |
| 0   | 0    | 0    | 0    | 44   | 0   | 0    |
| 0   | 0    | 10   | 0    | 70   | 0   | 0    |
| 359 | 290  | 68   | 1442 | 1268 | 105 | 263  |
| 0   | 0    | 0    | 0    | 0    | 0   | 76   |
| 0   | 0    | 0    | 121  | 0    | 0   | 0    |
| 0   | 0    | 0    | 97   | 0    | 0   | 28   |
| 0   | 0    | 0    | 175  | 1405 | 0   | 0    |
| 0   | 0    | 0    | 71   | 100  | 14  | 0    |
| 464 | 704  | 22   | 1298 | 2730 | 696 | 1003 |
| 0   | 0    | 0    | 82   | 326  | 45  | 35   |
| 0   | 0    | 0    | 0    | 0    | 0   | 0    |
| 0   | 118  | 161  | 502  | 808  | 262 | 113  |
| 0   | 0    | 40   | 527  | 134  | 108 | 92   |
| 11  | 0    | 0    | 252  | 42   | 27  | 45   |
| 0   | 54   | 0    | 32   | 218  | 0   | 128  |
| 0   | 0    | 0    | 188  | 39   | 39  | 36   |
| 0   | 0    | 0    | 0    | 26   | 0   | 0    |
| 0   | 0    | 0    | 72   | 48   | 32  | 35   |
| 146 | 1339 | 90   | 1144 | 2088 | 163 | 1491 |
| 0   | 0    | 0    | 120  | 305  | 0   | 23   |
| 0   | 0    | 0    | 145  | 238  | 0   | 34   |
| 0   | 0    | 0    | 36   | 15   | 0   | 0    |
| 0   | 0    | 0    | 0    | 39   | 0   | 0    |
| 0   | 0    | 27   | 337  | 126  | 59  | 89   |
| 0   | 0    | 0    | 226  | 115  | 17  | 64   |
| 0   | 0    | 0    | 76   | 114  | 0   | 93   |
| 0   | 0    | 46   | 0    | 53   | 0   | 0    |
| 236 | 259  | 1243 | 790  | 242  | 322 | 458  |
| 0   | 0    | 0    | 0    | 0    | 0   | 0    |
| 0   | 40   | 19   | 775  | 3529 | 0   | 187  |

|      |      |     |      |      |       |      |
|------|------|-----|------|------|-------|------|
| 157  | 37   | 61  | 3447 | 3333 | 71    | 92   |
| 0    | 0    | 0   | 55   | 32   | 0     | 0    |
| 0    | 0    | 0   | 290  | 209  | 0     | 0    |
| 603  | 1044 | 197 | 569  | 1711 | 0     | 697  |
| 0    | 0    | 0   | 228  | 152  | 0     | 0    |
| 0    | 0    | 0   | 87   | 60   | 0     | 40   |
| 41   | 15   | 0   | 142  | 196  | 0     | 0    |
| 85   | 0    | 0   | 454  | 642  | 0     | 79   |
| 0    | 0    | 0   | 52   | 24   | 0     | 0    |
| 0    | 0    | 0   | 14   | 0    | 0     | 0    |
| 0    | 0    | 0   | 229  | 0    | 0     | 0    |
| 0    | 0    | 0   | 181  | 126  | 0     | 0    |
| 230  | 160  | 276 | 3161 | 1687 | 384   | 502  |
| 27   | 0    | 0   | 570  | 437  | 47    | 12   |
| 0    | 0    | 0   | 219  | 46   | 45    | 0    |
| 57   | 12   | 49  | 355  | 79   | 103   | 166  |
| 66   | 0    | 66  | 1340 | 291  | 314   | 163  |
| 0    | 0    | 0   | 34   | 42   | 0     | 0    |
| 0    | 0    | 0   | 59   | 13   | 28    | 64   |
| 0    | 0    | 22  | 68   | 90   | 32    | 151  |
| 0    | 0    | 23  | 0    | 12   | 0     | 33   |
| 11   | 0    | 0   | 59   | 441  | 66    | 40   |
| 267  | 55   | 37  | 253  | 1068 | 385   | 387  |
| 69   | 34   | 36  | 77   | 302  | 65    | 1791 |
| 18   | 0    | 27  | 55   | 412  | 18    | 519  |
| 0    | 0    | 0   | 76   | 125  | 33    | 11   |
| 3689 | 496  | 393 | 1622 | 3910 | 10642 | 9926 |
| 375  | 77   | 45  | 110  | 645  | 1983  | 689  |
| 67   | 0    | 0   | 30   | 198  | 344   | 321  |
| 27   | 0    | 0   | 183  | 93   | 662   | 38   |
| 269  | 0    | 38  | 2137 | 673  | 2087  | 399  |
| 614  | 59   | 25  | 248  | 344  | 2533  | 262  |
| 232  | 0    | 12  | 29   | 1060 | 842   | 438  |
| 0    | 0    | 0   | 97   | 0    | 0     | 36   |
| 243  | 0    | 0   | 82   | 362  | 1489  | 59   |
| 14   | 0    | 0   | 222  | 961  | 10    | 218  |
| 0    | 0    | 0   | 47   | 111  | 0     | 0    |
| 336  | 43   | 42  | 248  | 4221 | 629   | 1252 |
| 112  | 36   | 41  | 360  | 1141 | 40    | 1531 |
| 132  | 0    | 0   | 347  | 2729 | 178   | 293  |
| 44   | 0    | 52  | 898  | 2267 | 65    | 38   |
| 61   | 0    | 51  | 865  | 2035 | 21    | 15   |
| 0    | 0    | 13  | 0    | 387  | 27    | 0    |
| 36   | 0    | 10  | 118  | 239  | 53    | 33   |
| 32   | 0    | 34  | 218  | 202  | 14    | 89   |
| 0    | 0    | 0   | 25   | 43   | 0     | 0    |



|     |     |     |     |      |     |     |
|-----|-----|-----|-----|------|-----|-----|
| 13  | 0   | 0   | 450 | 827  | 12  | 267 |
| 450 | 93  | 130 | 80  | 13   | 30  | 79  |
| 13  | 0   | 0   | 131 | 294  | 0   | 0   |
| 179 | 66  | 216 | 98  | 147  | 22  | 174 |
| 33  | 0   | 0   | 35  | 0    | 0   | 21  |
| 0   | 0   | 0   | 0   | 0    | 0   | 0   |
| 12  | 10  | 15  | 48  | 55   | 31  | 164 |
| 28  | 0   | 28  | 58  | 49   | 0   | 43  |
| 0   | 0   | 0   | 82  | 11   | 0   | 0   |
| 0   | 0   | 0   | 36  | 0    | 0   | 59  |
| 0   | 0   | 0   | 0   | 0    | 0   | 0   |
| 278 | 12  | 88  | 445 | 40   | 0   | 175 |
| 0   | 61  | 41  | 0   | 0    | 0   | 688 |
| 36  | 0   | 0   | 72  | 0    | 0   | 15  |
| 0   | 0   | 0   | 0   | 0    | 0   | 0   |
| 0   | 0   | 0   | 0   | 22   | 0   | 0   |
| 0   | 0   | 122 | 24  | 0    | 0   | 241 |
| 0   | 0   | 0   | 21  | 0    | 0   | 85  |
| 249 | 302 | 339 | 825 | 1039 | 442 | 299 |
| 0   | 0   | 0   | 0   | 0    | 0   | 0   |
| 0   | 0   | 0   | 0   | 0    | 0   | 0   |
| 0   | 0   | 0   | 0   | 0    | 0   | 0   |
| 0   | 0   | 0   | 0   | 0    | 0   | 0   |
| 11  | 0   | 116 | 409 | 1251 | 146 | 61  |
| 0   | 0   | 0   | 0   | 0    | 0   | 0   |
| 0   | 0   | 0   | 0   | 45   | 0   | 0   |
| 15  | 0   | 0   | 48  | 146  | 0   | 0   |
| 12  | 0   | 0   | 69  | 131  | 0   | 0   |
| 0   | 0   | 0   | 0   | 26   | 0   | 0   |
| 0   | 0   | 0   | 0   | 37   | 0   | 0   |
| 0   | 0   | 0   | 0   | 0    | 0   | 0   |
| 0   | 0   | 0   | 0   | 0    | 0   | 0   |
| 0   | 0   | 0   | 0   | 0    | 0   | 0   |
| 0   | 0   | 0   | 0   | 15   | 0   | 0   |
| 0   | 61  | 0   | 170 | 288  | 15  | 125 |
| 0   | 0   | 0   | 0   | 10   | 0   | 0   |
| 0   | 0   | 0   | 0   | 0    | 13  | 0   |
| 0   | 0   | 0   | 0   | 0    | 0   | 0   |
| 0   | 0   | 0   | 0   | 0    | 0   | 0   |
| 0   | 0   | 0   | 0   | 0    | 33  | 19  |
| 0   | 0   | 0   | 97  | 0    | 0   | 0   |
| 0   | 0   | 0   | 38  | 10   | 0   | 0   |
| 22  | 0   | 33  | 72  | 24   | 62  | 69  |
| 42  | 0   | 29  | 239 | 33   | 52  | 53  |
| 0   | 0   | 0   | 0   | 0    | 0   | 0   |
| 0   | 0   | 0   | 0   | 0    | 0   | 0   |

|     |     |     |      |     |      |      |
|-----|-----|-----|------|-----|------|------|
| 0   | 11  | 0   | 100  | 58  | 16   | 124  |
| 0   | 0   | 0   | 0    | 0   | 0    | 0    |
| 0   | 0   | 0   | 30   | 0   | 0    | 89   |
| 343 | 184 | 270 | 3813 | 264 | 1230 | 1526 |
| 0   | 0   | 0   | 12   | 18  | 17   | 0    |
| 0   | 38  | 0   | 33   | 38  | 0    | 17   |
| 0   | 0   | 0   | 66   | 30  | 0    | 45   |
| 0   | 0   | 0   | 90   | 57  | 39   | 93   |
| 0   | 21  | 0   | 11   | 10  | 136  | 169  |
| 0   | 0   | 0   | 71   | 449 | 0    | 0    |
| 0   | 73  | 0   | 107  | 139 | 23   | 170  |
| 95  | 979 | 87  | 463  | 224 | 227  | 1717 |
| 0   | 51  | 0   | 75   | 527 | 22   | 472  |
| 79  | 360 | 157 | 267  | 383 | 376  | 728  |
| 0   | 0   | 0   | 30   | 104 | 0    | 101  |
| 0   | 0   | 0   | 0    | 0   | 0    | 0    |
| 0   | 0   | 0   | 0    | 0   | 0    | 0    |
| 0   | 0   | 0   | 0    | 97  | 13   | 11   |
| 0   | 0   | 0   | 0    | 0   | 0    | 0    |
| 0   | 0   | 0   | 0    | 0   | 0    | 0    |
| 0   | 0   | 0   | 41   | 58  | 90   | 23   |
| 0   | 0   | 0   | 0    | 0   | 0    | 0    |
| 0   | 0   | 0   | 68   | 71  | 0    | 86   |
| 0   | 0   | 0   | 70   | 459 | 125  | 218  |
| 0   | 0   | 0   | 0    | 0   | 0    | 0    |
| 0   | 0   | 0   | 0    | 11  | 0    | 0    |
| 0   | 0   | 0   | 41   | 15  | 13   | 14   |
| 0   | 0   | 0   | 0    | 0   | 0    | 0    |
| 183 | 173 | 240 | 1020 | 232 | 471  | 639  |
| 0   | 0   | 0   | 39   | 0   | 0    | 0    |
| 0   | 0   | 0   | 11   | 37  | 0    | 0    |
| 0   | 0   | 0   | 155  | 46  | 0    | 0    |
| 0   | 0   | 0   | 62   | 27  | 12   | 0    |
| 0   | 0   | 0   | 0    | 0   | 0    | 0    |
| 0   | 0   | 0   | 0    | 0   | 0    | 0    |
| 0   | 0   | 0   | 0    | 0   | 0    | 0    |
| 0   | 0   | 0   | 0    | 0   | 0    | 0    |
| 41  | 439 | 61  | 358  | 333 | 383  | 1838 |
| 0   | 0   | 0   | 0    | 0   | 0    | 0    |
| 0   | 0   | 0   | 17   | 100 | 0    | 14   |
| 0   | 31  | 0   | 23   | 101 | 31   | 344  |
| 0   | 0   | 0   | 12   | 22  | 0    | 39   |
| 0   | 0   | 0   | 0    | 24  | 0    | 0    |
| 0   | 0   | 0   | 0    | 0   | 0    | 0    |
| 0   | 0   | 0   | 0    | 0   | 0    | 0    |
| 0   | 0   | 0   | 0    | 0   | 0    | 0    |

|     |      |      |      |       |      |      |
|-----|------|------|------|-------|------|------|
| 13  | 0    | 0    | 144  | 94    | 10   | 0    |
| 0   | 0    | 0    | 0    | 0     | 0    | 41   |
| 0   | 0    | 0    | 0    | 0     | 0    | 0    |
| 0   | 0    | 0    | 0    | 0     | 0    | 0    |
| 0   | 0    | 0    | 0    | 26    | 0    | 0    |
| 0   | 0    | 0    | 0    | 42    | 0    | 0    |
| 0   | 0    | 0    | 0    | 0     | 0    | 0    |
| 0   | 0    | 0    | 31   | 209   | 125  | 10   |
| 357 | 764  | 213  | 2889 | 1558  | 932  | 2795 |
| 79  | 95   | 25   | 214  | 27    | 79   | 181  |
| 0   | 0    | 0    | 71   | 207   | 0    | 0    |
| 46  | 381  | 239  | 849  | 442   | 311  | 828  |
| 0   | 0    | 0    | 0    | 0     | 0    | 0    |
| 0   | 0    | 0    | 0    | 0     | 14   | 0    |
| 0   | 0    | 0    | 69   | 0     | 0    | 0    |
| 0   | 0    | 17   | 2291 | 526   | 420  | 260  |
| 0   | 0    | 0    | 76   | 0     | 0    | 0    |
| 0   | 0    | 0    | 0    | 25    | 0    | 0    |
| 0   | 0    | 0    | 12   | 22    | 0    | 11   |
| 0   | 0    | 0    | 26   | 25    | 0    | 0    |
| 0   | 0    | 0    | 0    | 0     | 0    | 0    |
| 0   | 25   | 0    | 0    | 0     | 11   | 88   |
| 0   | 13   | 0    | 0    | 0     | 37   | 78   |
| 18  | 0    | 0    | 386  | 51    | 59   | 166  |
| 60  | 38   | 494  | 166  | 1474  | 180  | 245  |
| 363 | 288  | 114  | 1476 | 2318  | 264  | 900  |
| 73  | 130  | 26   | 119  | 234   | 40   | 436  |
| 11  | 0    | 0    | 57   | 440   | 0    | 0    |
| 56  | 0    | 30   | 155  | 810   | 0    | 140  |
| 0   | 0    | 0    | 12   | 23    | 0    | 0    |
| 0   | 0    | 0    | 0    | 10    | 0    | 0    |
| 0   | 0    | 0    | 0    | 12    | 0    | 0    |
| 0   | 0    | 0    | 46   | 198   | 0    | 0    |
| 73  | 54   | 0    | 58   | 62    | 0    | 62   |
| 134 | 48   | 0    | 292  | 494   | 48   | 102  |
| 0   | 0    | 0    | 52   | 0     | 0    | 11   |
| 0   | 27   | 23   | 0    | 894   | 40   | 56   |
| 874 | 2009 | 1565 | 957  | 11929 | 1153 | 1765 |
| 29  | 58   | 21   | 141  | 330   | 121  | 246  |
| 0   | 0    | 0    | 0    | 15    | 0    | 0    |
| 35  | 123  | 184  | 24   | 2290  | 99   | 31   |
| 0   | 0    | 0    | 0    | 19    | 0    | 0    |
| 0   | 11   | 0    | 0    | 45    | 0    | 0    |
| 0   | 0    | 0    | 0    | 271   | 0    | 0    |
| 0   | 0    | 0    | 0    | 0     | 0    | 0    |
| 0   | 0    | 0    | 15   | 269   | 109  | 12   |

|      |      |      |       |      |      |      |
|------|------|------|-------|------|------|------|
| 0    | 0    | 0    | 0     | 294  | 0    | 0    |
| 0    | 0    | 0    | 0     | 157  | 0    | 0    |
| 0    | 0    | 0    | 0     | 0    | 0    | 0    |
| 42   | 15   | 59   | 10    | 1852 | 45   | 0    |
| 0    | 14   | 0    | 54    | 0    | 21   | 37   |
| 0    | 0    | 0    | 114   | 1057 | 0    | 14   |
| 0    | 0    | 0    | 222   | 214  | 43   | 34   |
| 54   | 126  | 10   | 39    | 665  | 0    | 52   |
| 0    | 0    | 0    | 92    | 124  | 37   | 0    |
| 0    | 0    | 0    | 0     | 55   | 0    | 10   |
| 134  | 203  | 69   | 248   | 1562 | 45   | 570  |
| 18   | 0    | 0    | 0     | 181  | 12   | 0    |
| 0    | 0    | 0    | 0     | 31   | 0    | 0    |
| 18   | 0    | 31   | 12    | 10   | 0    | 10   |
| 0    | 0    | 0    | 0     | 55   | 0    | 11   |
| 0    | 0    | 0    | 0     | 0    | 0    | 0    |
| 0    | 0    | 0    | 0     | 0    | 0    | 0    |
| 0    | 0    | 0    | 0     | 0    | 0    | 0    |
| 40   | 32   | 14   | 451   | 60   | 125  | 244  |
| 0    | 0    | 0    | 0     | 0    | 0    | 14   |
| 0    | 0    | 0    | 124   | 37   | 0    | 16   |
| 0    | 0    | 0    | 0     | 0    | 0    | 0    |
| 0    | 0    | 0    | 41    | 742  | 0    | 0    |
| 0    | 0    | 0    | 0     | 397  | 0    | 0    |
| 14   | 0    | 38   | 39    | 1479 | 0    | 0    |
| 0    | 0    | 0    | 0     | 57   | 0    | 0    |
| 0    | 0    | 0    | 0     | 0    | 0    | 0    |
| 0    | 0    | 0    | 0     | 103  | 0    | 0    |
| 0    | 0    | 0    | 12    | 15   | 0    | 0    |
| 0    | 0    | 0    | 0     | 42   | 0    | 0    |
| 0    | 0    | 0    | 0     | 93   | 0    | 0    |
| 0    | 0    | 0    | 0     | 32   | 0    | 0    |
| 0    | 0    | 0    | 0     | 22   | 0    | 0    |
| 0    | 0    | 0    | 21    | 0    | 0    | 0    |
| 0    | 0    | 0    | 0     | 0    | 0    | 0    |
| 0    | 0    | 0    | 0     | 90   | 0    | 0    |
| 0    | 20   | 38   | 13    | 182  | 14   | 0    |
| 0    | 27   | 0    | 88    | 444  | 0    | 71   |
| 1884 | 1378 | 1988 | 15145 | 4419 | 4095 | 6679 |
| 0    | 0    | 0    | 0     | 128  | 0    | 0    |
| 0    | 0    | 0    | 0     | 0    | 0    | 0    |
| 0    | 0    | 0    | 0     | 32   | 0    | 0    |
| 38   | 31   | 0    | 153   | 101  | 15   | 123  |
| 0    | 55   | 10   | 12    | 110  | 65   | 300  |
| 0    | 0    | 0    | 0     | 36   | 0    | 0    |
| 0    | 0    | 0    | 0     | 0    | 0    | 0    |

|     |     |     |      |      |      |     |
|-----|-----|-----|------|------|------|-----|
| 0   | 0   | 0   | 0    | 0    | 0    | 0   |
| 21  | 0   | 0   | 90   | 657  | 25   | 0   |
| 0   | 0   | 0   | 14   | 53   | 0    | 0   |
| 0   | 0   | 0   | 0    | 0    | 0    | 0   |
| 0   | 0   | 0   | 0    | 139  | 0    | 0   |
| 0   | 0   | 0   | 11   | 13   | 53   | 53  |
| 0   | 0   | 0   | 0    | 0    | 0    | 0   |
| 0   | 27  | 0   | 0    | 0    | 0    | 12  |
| 0   | 0   | 0   | 0    | 0    | 0    | 0   |
| 0   | 59  | 0   | 33   | 0    | 0    | 108 |
| 0   | 0   | 0   | 0    | 11   | 33   | 0   |
| 0   | 0   | 0   | 102  | 444  | 0    | 0   |
| 187 | 0   | 187 | 8206 | 3148 | 1150 | 799 |
| 10  | 0   | 12  | 694  | 318  | 104  | 195 |
| 0   | 0   | 0   | 0    | 316  | 0    | 0   |
| 0   | 0   | 0   | 0    | 0    | 0    | 0   |
| 0   | 0   | 0   | 0    | 34   | 0    | 0   |
| 0   | 0   | 0   | 0    | 17   | 0    | 0   |
| 0   | 0   | 16  | 254  | 123  | 10   | 0   |
| 35  | 22  | 70  | 2161 | 824  | 494  | 309 |
| 15  | 0   | 29  | 1271 | 453  | 128  | 288 |
| 51  | 22  | 31  | 438  | 47   | 109  | 104 |
| 56  | 292 | 38  | 23   | 105  | 12   | 361 |
| 0   | 0   | 0   | 0    | 11   | 0    | 0   |
| 0   | 0   | 0   | 15   | 0    | 0    | 0   |
| 0   | 0   | 0   | 0    | 0    | 0    | 0   |
| 0   | 0   | 0   | 0    | 77   | 0    | 0   |
| 0   | 0   | 10  | 1187 | 285  | 89   | 122 |
| 0   | 0   | 0   | 21   | 257  | 0    | 38  |
| 0   | 0   | 0   | 0    | 94   | 62   | 28  |
| 0   | 0   | 0   | 0    | 34   | 0    | 0   |
| 0   | 0   | 0   | 0    | 0    | 0    | 0   |
| 258 | 41  | 27  | 1656 | 1040 | 71   | 141 |
| 0   | 0   | 0   | 17   | 0    | 150  | 22  |
| 0   | 0   | 0   | 57   | 0    | 42   | 16  |
| 0   | 0   | 0   | 0    | 0    | 0    | 0   |
| 16  | 0   | 0   | 651  | 710  | 0    | 29  |
| 0   | 0   | 0   | 128  | 238  | 0    | 0   |
| 0   | 0   | 10  | 310  | 887  | 40   | 205 |
| 74  | 0   | 0   | 1019 | 1477 | 25   | 13  |
| 0   | 0   | 0   | 89   | 345  | 0    | 0   |
| 0   | 0   | 0   | 0    | 0    | 0    | 31  |
| 0   | 0   | 37  | 13   | 34   | 0    | 11  |
| 118 | 137 | 20  | 1075 | 3783 | 47   | 147 |
| 0   | 0   | 0   | 139  | 0    | 0    | 0   |
| 0   | 0   | 0   | 0    | 0    | 0    | 0   |

|     |      |      |      |      |     |      |
|-----|------|------|------|------|-----|------|
| 0   | 0    | 0    | 0    | 0    | 0   | 0    |
| 0   | 0    | 0    | 33   | 0    | 0   | 0    |
| 0   | 0    | 0    | 0    | 0    | 0   | 0    |
| 0   | 0    | 14   | 171  | 89   | 0   | 10   |
| 170 | 105  | 0    | 784  | 712  | 21  | 205  |
| 36  | 69   | 11   | 414  | 1187 | 10  | 87   |
| 10  | 0    | 0    | 586  | 745  | 14  | 0    |
| 0   | 0    | 0    | 17   | 252  | 0   | 0    |
| 258 | 1251 | 58   | 284  | 299  | 0   | 352  |
| 0   | 0    | 20   | 0    | 29   | 10  | 12   |
| 0   | 0    | 0    | 0    | 32   | 0   | 0    |
| 0   | 0    | 0    | 59   | 296  | 0   | 0    |
| 0   | 0    | 0    | 89   | 94   | 0   | 0    |
| 0   | 0    | 0    | 26   | 0    | 0   | 0    |
| 0   | 0    | 0    | 0    | 0    | 0   | 0    |
| 0   | 0    | 0    | 0    | 0    | 0   | 0    |
| 0   | 0    | 0    | 0    | 0    | 0   | 0    |
| 0   | 22   | 0    | 66   | 215  | 0   | 10   |
| 0   | 0    | 0    | 14   | 36   | 0   | 0    |
| 0   | 0    | 0    | 139  | 0    | 0   | 0    |
| 0   | 0    | 1282 | 1235 | 164  | 95  | 0    |
| 0   | 0    | 57   | 0    | 16   | 0   | 0    |
| 45  | 0    | 515  | 2923 | 1117 | 532 | 62   |
| 0   | 0    | 0    | 33   | 0    | 0   | 0    |
| 78  | 0    | 190  | 3185 | 583  | 701 | 320  |
| 0   | 0    | 12   | 12   | 0    | 0   | 0    |
| 0   | 0    | 175  | 158  | 116  | 0   | 0    |
| 61  | 0    | 274  | 1813 | 133  | 475 | 142  |
| 0   | 0    | 0    | 30   | 0    | 0   | 0    |
| 0   | 0    | 0    | 0    | 0    | 0   | 0    |
| 0   | 0    | 0    | 0    | 0    | 0   | 0    |
| 12  | 0    | 0    | 64   | 0    | 0   | 423  |
| 0   | 0    | 0    | 0    | 0    | 0   | 79   |
| 0   | 0    | 0    | 48   | 16   | 0   | 0    |
| 0   | 0    | 0    | 74   | 130  | 0   | 41   |
| 0   | 0    | 0    | 0    | 44   | 0   | 0    |
| 0   | 0    | 0    | 110  | 12   | 0   | 92   |
| 0   | 0    | 0    | 0    | 0    | 0   | 11   |
| 0   | 0    | 0    | 27   | 10   | 0   | 16   |
| 0   | 0    | 0    | 0    | 840  | 0   | 0    |
| 0   | 0    | 0    | 0    | 0    | 13  | 1179 |
| 156 | 0    | 0    | 70   | 0    | 0   | 59   |
| 0   | 11   | 12   | 722  | 578  | 126 | 1905 |
| 0   | 0    | 12   | 50   | 26   | 14  | 0    |
| 0   | 54   | 0    | 129  | 22   | 14  | 111  |
| 0   | 0    | 0    | 0    | 59   | 28  | 0    |

|      |       |      |       |       |      |       |
|------|-------|------|-------|-------|------|-------|
| 0    | 0     | 0    | 16    | 44    | 0    | 0     |
| 112  | 11    | 0    | 282   | 3019  | 40   | 87    |
| 27   | 0     | 0    | 198   | 1344  | 0    | 0     |
| 0    | 0     | 0    | 75    | 113   | 27   | 167   |
| 0    | 0     | 0    | 0     | 51    | 0    | 28    |
| 0    | 0     | 0    | 59    | 424   | 54   | 22    |
| 0    | 0     | 0    | 12    | 242   | 56   | 180   |
| 0    | 0     | 0    | 101   | 207   | 40   | 90    |
| 515  | 817   | 214  | 16314 | 3155  | 1240 | 3069  |
| 68   | 53    | 469  | 4772  | 2070  | 575  | 211   |
| 0    | 27    | 177  | 2140  | 692   | 367  | 69    |
| 0    | 0     | 0    | 26    | 0     | 47   | 111   |
| 0    | 0     | 0    | 0     | 0     | 0    | 0     |
| 0    | 63    | 0    | 25    | 182   | 65   | 165   |
| 0    | 0     | 0    | 0     | 0     | 0    | 0     |
| 0    | 66    | 11   | 30    | 42    | 234  | 98    |
| 0    | 0     | 0    | 27    | 81    | 0    | 0     |
| 0    | 0     | 0    | 67    | 38    | 0    | 0     |
| 0    | 0     | 0    | 13    | 34    | 0    | 0     |
| 0    | 0     | 0    | 0     | 0     | 0    | 0     |
| 0    | 14    | 0    | 185   | 132   | 13   | 168   |
| 85   | 39    | 11   | 214   | 348   | 41   | 272   |
| 0    | 0     | 0    | 45    | 157   | 0    | 124   |
| 0    | 0     | 0    | 69    | 0     | 0    | 0     |
| 0    | 0     | 0    | 0     | 0     | 0    | 0     |
| 108  | 0     | 0    | 522   | 1895  | 40   | 26    |
| 877  | 2214  | 272  | 2279  | 9652  | 1003 | 544   |
| 520  | 254   | 158  | 2106  | 2044  | 158  | 617   |
| 4842 | 10633 | 4176 | 9712  | 25809 | 2504 | 12527 |
| 40   | 0     | 0    | 132   | 687   | 33   | 0     |
| 47   | 0     | 0    | 139   | 706   | 0    | 0     |
| 0    | 0     | 0    | 170   | 217   | 0    | 0     |
| 660  | 1615  | 309  | 2681  | 7013  | 412  | 598   |
| 799  | 216   | 108  | 1610  | 2615  | 381  | 373   |
| 25   | 0     | 0    | 184   | 472   | 0    | 0     |
| 0    | 0     | 0    | 0     | 123   | 0    | 0     |
| 314  | 2674  | 86   | 2608  | 6643  | 695  | 5872  |
| 61   | 247   | 119  | 1445  | 3706  | 271  | 4736  |
| 26   | 345   | 12   | 1215  | 729   | 348  | 2251  |
| 0    | 124   | 101  | 457   | 422   | 667  | 1586  |
| 0    | 0     | 0    | 0     | 0     | 0    | 47    |
| 0    | 0     | 0    | 0     | 0     | 0    | 0     |
| 150  | 3363  | 255  | 1092  | 2679  | 1123 | 7290  |
| 0    | 33    | 0    | 140   | 14    | 0    | 175   |
| 0    | 0     | 0    | 0     | 0     | 48   | 0     |
| 87   | 166   | 100  | 840   | 4226  | 388  | 2837  |

|     |     |     |       |       |      |      |
|-----|-----|-----|-------|-------|------|------|
| 91  | 90  | 34  | 785   | 1477  | 33   | 638  |
| 351 | 287 | 870 | 28920 | 46669 | 3036 | 3434 |
| 0   | 0   | 0   | 23    | 0     | 30   | 0    |
| 50  | 0   | 0   | 1253  | 31948 | 110  | 21   |
| 27  | 44  | 38  | 154   | 277   | 29   | 344  |
| 0   | 0   | 0   | 70    | 61    | 0    | 0    |
| 249 | 131 | 14  | 1868  | 2421  | 88   | 777  |
| 0   | 0   | 33  | 553   | 235   | 13   | 0    |
| 0   | 0   | 0   | 0     | 0     | 0    | 0    |
| 165 | 0   | 0   | 75    | 46    | 34   | 89   |
| 451 | 38  | 12  | 215   | 602   | 82   | 473  |
| 0   | 24  | 0   | 92    | 1057  | 25   | 97   |
| 0   | 0   | 0   | 0     | 0     | 0    | 0    |
| 0   | 0   | 0   | 0     | 30    | 0    | 0    |
| 0   | 32  | 26  | 152   | 81    | 0    | 299  |
| 138 | 127 | 23  | 583   | 3361  | 266  | 149  |
| 189 | 242 | 32  | 274   | 318   | 266  | 1841 |
| 10  | 0   | 0   | 56    | 397   | 72   | 68   |
| 0   | 0   | 0   | 83    | 81    | 0    | 78   |
| 0   | 0   | 0   | 60    | 25    | 28   | 153  |
| 28  | 11  | 0   | 195   | 291   | 94   | 248  |
| 0   | 0   | 0   | 0     | 115   | 0    | 0    |
| 0   | 0   | 0   | 0     | 34    | 0    | 0    |
| 0   | 0   | 0   | 11    | 21    | 0    | 0    |
| 24  | 0   | 0   | 337   | 3765  | 0    | 0    |
| 0   | 0   | 0   | 0     | 0     | 0    | 0    |
| 0   | 0   | 0   | 0     | 0     | 0    | 0    |
| 0   | 0   | 0   | 0     | 26    | 0    | 0    |
| 0   | 0   | 0   | 0     | 0     | 0    | 0    |
| 0   | 0   | 0   | 64    | 0     | 0    | 464  |
| 0   | 0   | 0   | 28    | 325   | 0    | 0    |
| 0   | 0   | 0   | 0     | 0     | 0    | 0    |
| 0   | 0   | 0   | 463   | 697   | 0    | 11   |
| 23  | 0   | 0   | 573   | 4606  | 31   | 36   |
| 0   | 181 | 0   | 119   | 40    | 105  | 103  |
| 0   | 0   | 0   | 89    | 27    | 44   | 66   |
| 24  | 12  | 0   | 124   | 144   | 0    | 31   |
| 156 | 134 | 0   | 16    | 0     | 0    | 102  |
| 215 | 218 | 44  | 685   | 3995  | 58   | 178  |
| 0   | 0   | 0   | 99    | 59    | 35   | 0    |
| 0   | 0   | 63  | 83    | 33    | 22   | 11   |
| 0   | 11  | 17  | 10    | 343   | 86   | 0    |
| 0   | 0   | 0   | 0     | 0     | 0    | 0    |
| 0   | 0   | 0   | 0     | 463   | 29   | 0    |
| 0   | 0   | 0   | 0     | 255   | 0    | 0    |
| 0   | 0   | 0   | 12    | 517   | 17   | 0    |



|     |    |    |     |     |     |     |
|-----|----|----|-----|-----|-----|-----|
| 0   | 0  | 0  | 0   | 0   | 0   | 0   |
| 30  | 0  | 0  | 0   | 297 | 0   | 53  |
| 0   | 0  | 11 | 54  | 230 | 13  | 49  |
| 0   | 0  | 0  | 0   | 61  | 0   | 0   |
| 0   | 0  | 0  | 362 | 119 | 0   | 10  |
| 0   | 0  | 0  | 0   | 0   | 0   | 0   |
| 0   | 0  | 0  | 0   | 0   | 0   | 0   |
| 0   | 0  | 0  | 0   | 0   | 0   | 0   |
| 0   | 0  | 0  | 43  | 0   | 0   | 0   |
| 0   | 0  | 0  | 0   | 421 | 0   | 58  |
| 0   | 0  | 0  | 16  | 0   | 0   | 0   |
| 0   | 0  | 0  | 143 | 0   | 0   | 0   |
| 11  | 0  | 0  | 95  | 52  | 492 | 35  |
| 0   | 26 | 11 | 239 | 0   | 541 | 80  |
| 0   | 0  | 0  | 207 | 94  | 932 | 64  |
| 65  | 0  | 0  | 93  | 18  | 46  | 0   |
| 0   | 12 | 0  | 40  | 0   | 178 | 42  |
| 0   | 0  | 0  | 63  | 154 | 14  | 0   |
| 0   | 0  | 0  | 65  | 0   | 0   | 0   |
| 0   | 0  | 0  | 16  | 0   | 0   | 0   |
| 0   | 0  | 0  | 10  | 68  | 12  | 527 |
| 14  | 0  | 0  | 47  | 308 | 34  | 29  |
| 0   | 0  | 0  | 11  | 53  | 0   | 19  |
| 0   | 0  | 0  | 162 | 0   | 0   | 0   |
| 0   | 0  | 0  | 60  | 93  | 0   | 0   |
| 0   | 0  | 0  | 54  | 0   | 0   | 11  |
| 0   | 0  | 0  | 13  | 0   | 0   | 0   |
| 0   | 0  | 0  | 29  | 0   | 20  | 0   |
| 242 | 0  | 0  | 11  | 58  | 0   | 0   |
| 0   | 0  | 0  | 67  | 0   | 0   | 0   |
| 0   | 0  | 0  | 10  | 0   | 0   | 11  |
| 0   | 0  | 0  | 19  | 0   | 0   | 0   |
| 0   | 0  | 0  | 41  | 23  | 0   | 0   |
| 0   | 0  | 0  | 22  | 16  | 0   | 51  |
| 10  | 0  | 33 | 22  | 0   | 0   | 35  |
| 0   | 0  | 0  | 10  | 0   | 0   | 0   |
| 0   | 0  | 0  | 22  | 0   | 0   | 0   |
| 0   | 0  | 0  | 36  | 0   | 0   | 0   |
| 0   | 0  | 0  | 45  | 0   | 0   | 0   |
| 0   | 0  | 0  | 58  | 0   | 0   | 0   |
| 0   | 0  | 0  | 27  | 0   | 0   | 0   |
| 0   | 0  | 0  | 26  | 0   | 0   | 0   |
| 0   | 0  | 0  | 28  | 0   | 0   | 0   |
| 0   | 0  | 0  | 11  | 0   | 0   | 0   |
| 0   | 0  | 0  | 10  | 0   | 0   | 0   |
| 0   | 0  | 0  | 53  | 0   | 0   | 0   |

|    |     |    |     |     |      |     |
|----|-----|----|-----|-----|------|-----|
| 0  | 0   | 0  | 12  | 0   | 0    | 0   |
| 0  | 0   | 0  | 24  | 0   | 0    | 0   |
| 0  | 0   | 0  | 33  | 0   | 0    | 0   |
| 0  | 0   | 0  | 21  | 219 | 0    | 71  |
| 0  | 0   | 0  | 10  | 0   | 0    | 0   |
| 0  | 0   | 0  | 10  | 0   | 0    | 0   |
| 0  | 0   | 0  | 129 | 24  | 10   | 102 |
| 0  | 0   | 0  | 12  | 0   | 22   | 13  |
| 0  | 0   | 0  | 13  | 0   | 0    | 0   |
| 0  | 0   | 0  | 29  | 58  | 0    | 28  |
| 0  | 0   | 0  | 12  | 0   | 0    | 0   |
| 0  | 0   | 0  | 11  | 0   | 0    | 0   |
| 0  | 31  | 0  | 62  | 0   | 87   | 204 |
| 0  | 0   | 0  | 22  | 0   | 11   | 0   |
| 23 | 0   | 0  | 25  | 0   | 0    | 0   |
| 0  | 0   | 0  | 22  | 0   | 0    | 0   |
| 0  | 0   | 0  | 27  | 0   | 0    | 14  |
| 0  | 0   | 0  | 41  | 0   | 0    | 0   |
| 12 | 0   | 0  | 85  | 233 | 30   | 662 |
| 0  | 0   | 0  | 41  | 0   | 0    | 0   |
| 0  | 0   | 0  | 10  | 0   | 0    | 0   |
| 0  | 0   | 0  | 12  | 11  | 0    | 0   |
| 0  | 0   | 0  | 90  | 0   | 0    | 0   |
| 0  | 0   | 0  | 100 | 27  | 0    | 0   |
| 0  | 0   | 0  | 12  | 0   | 0    | 0   |
| 0  | 0   | 0  | 10  | 0   | 0    | 26  |
| 0  | 0   | 0  | 98  | 0   | 10   | 23  |
| 0  | 0   | 0  | 71  | 0   | 0    | 0   |
| 0  | 0   | 0  | 34  | 0   | 0    | 0   |
| 0  | 0   | 0  | 26  | 0   | 0    | 0   |
| 0  | 0   | 0  | 10  | 209 | 0    | 0   |
| 0  | 0   | 0  | 23  | 0   | 0    | 64  |
| 0  | 0   | 0  | 39  | 0   | 0    | 38  |
| 0  | 0   | 24 | 125 | 10  | 0    | 84  |
| 0  | 0   | 0  | 11  | 0   | 0    | 0   |
| 0  | 0   | 0  | 10  | 0   | 162  | 42  |
| 0  | 0   | 0  | 12  | 0   | 0    | 0   |
| 0  | 0   | 0  | 16  | 0   | 27   | 37  |
| 0  | 0   | 0  | 13  | 0   | 0    | 0   |
| 0  | 0   | 0  | 27  | 0   | 0    | 0   |
| 0  | 438 | 11 | 84  | 45  | 3084 | 48  |
| 0  | 0   | 0  | 10  | 0   | 905  | 0   |
| 0  | 0   | 0  | 11  | 10  | 498  | 0   |
| 0  | 0   | 0  | 18  | 0   | 0    | 0   |
| 0  | 0   | 0  | 18  | 0   | 0    | 249 |
| 0  | 0   | 0  | 22  | 0   | 0    | 0   |

|     |     |     |     |     |     |       |
|-----|-----|-----|-----|-----|-----|-------|
| 0   | 0   | 0   | 10  | 0   | 28  | 13    |
| 0   | 0   | 0   | 14  | 0   | 63  | 170   |
| 0   | 0   | 0   | 25  | 0   | 0   | 0     |
| 0   | 0   | 0   | 16  | 0   | 22  | 0     |
| 11  | 0   | 178 | 49  | 0   | 33  | 3688  |
| 0   | 0   | 113 | 280 | 247 | 397 | 10031 |
| 0   | 0   | 0   | 10  | 63  | 0   | 0     |
| 0   | 0   | 0   | 26  | 0   | 216 | 126   |
| 0   | 0   | 0   | 36  | 0   | 37  | 0     |
| 0   | 0   | 0   | 35  | 0   | 10  | 52    |
| 0   | 0   | 0   | 38  | 0   | 0   | 0     |
| 0   | 0   | 0   | 12  | 10  | 0   | 0     |
| 0   | 0   | 0   | 91  | 55  | 0   | 45    |
| 0   | 0   | 0   | 11  | 0   | 0   | 0     |
| 0   | 0   | 0   | 11  | 0   | 0   | 0     |
| 0   | 0   | 0   | 88  | 0   | 0   | 0     |
| 0   | 0   | 0   | 101 | 0   | 0   | 0     |
| 0   | 0   | 0   | 95  | 0   | 0   | 0     |
| 14  | 0   | 0   | 14  | 114 | 0   | 166   |
| 0   | 0   | 0   | 11  | 0   | 0   | 0     |
| 0   | 0   | 0   | 12  | 0   | 0   | 0     |
| 0   | 0   | 0   | 41  | 0   | 0   | 0     |
| 0   | 0   | 0   | 98  | 0   | 0   | 0     |
| 0   | 0   | 0   | 155 | 72  | 0   | 0     |
| 0   | 0   | 0   | 67  | 14  | 0   | 0     |
| 20  | 0   | 0   | 10  | 998 | 0   | 15    |
| 0   | 0   | 0   | 51  | 0   | 0   | 0     |
| 0   | 0   | 0   | 54  | 0   | 0   | 0     |
| 15  | 0   | 0   | 46  | 187 | 0   | 10    |
| 0   | 0   | 0   | 54  | 0   | 0   | 0     |
| 0   | 0   | 0   | 43  | 0   | 0   | 0     |
| 0   | 0   | 0   | 63  | 465 | 0   | 0     |
| 0   | 0   | 0   | 10  | 0   | 0   | 0     |
| 110 | 117 | 0   | 177 | 420 | 0   | 120   |
| 0   | 0   | 0   | 98  | 0   | 0   | 24    |
| 0   | 0   | 0   | 44  | 0   | 0   | 0     |
| 0   | 0   | 0   | 10  | 0   | 0   | 0     |
| 0   | 0   | 0   | 50  | 0   | 11  | 0     |
| 0   | 0   | 0   | 24  | 0   | 0   | 0     |
| 0   | 0   | 0   | 82  | 0   | 0   | 0     |
| 0   | 0   | 0   | 10  | 163 | 0   | 0     |
| 0   | 53  | 0   | 122 | 0   | 36  | 24    |
| 0   | 0   | 0   | 41  | 0   | 0   | 0     |
| 0   | 0   | 0   | 38  | 10  | 0   | 0     |
| 0   | 0   | 0   | 10  | 0   | 0   | 0     |
| 11  | 0   | 126 | 111 | 39  | 0   | 0     |

|   |    |    |     |     |    |    |
|---|----|----|-----|-----|----|----|
| 0 | 0  | 0  | 230 | 0   | 0  | 0  |
| 0 | 0  | 0  | 23  | 0   | 0  | 0  |
| 0 | 0  | 0  | 10  | 0   | 0  | 0  |
| 0 | 0  | 0  | 36  | 37  | 0  | 0  |
| 0 | 0  | 0  | 182 | 0   | 0  | 0  |
| 0 | 0  | 0  | 10  | 41  | 0  | 0  |
| 0 | 0  | 0  | 11  | 0   | 0  | 0  |
| 0 | 0  | 0  | 57  | 78  | 0  | 0  |
| 0 | 0  | 0  | 21  | 0   | 0  | 0  |
| 0 | 0  | 0  | 28  | 0   | 0  | 0  |
| 0 | 0  | 0  | 130 | 0   | 0  | 0  |
| 0 | 0  | 0  | 15  | 75  | 0  | 0  |
| 0 | 0  | 0  | 195 | 466 | 0  | 0  |
| 0 | 0  | 0  | 62  | 0   | 0  | 0  |
| 0 | 0  | 0  | 57  | 204 | 0  | 0  |
| 0 | 0  | 0  | 34  | 45  | 0  | 0  |
| 0 | 0  | 0  | 51  | 174 | 0  | 0  |
| 0 | 0  | 0  | 342 | 234 | 0  | 0  |
| 0 | 0  | 0  | 77  | 789 | 0  | 0  |
| 0 | 0  | 0  | 37  | 0   | 0  | 0  |
| 0 | 0  | 0  | 26  | 0   | 0  | 0  |
| 0 | 0  | 0  | 60  | 42  | 0  | 0  |
| 0 | 0  | 0  | 24  | 25  | 0  | 0  |
| 0 | 0  | 0  | 109 | 55  | 11 | 0  |
| 0 | 10 | 0  | 131 | 55  | 0  | 11 |
| 0 | 0  | 0  | 60  | 26  | 0  | 0  |
| 0 | 0  | 0  | 332 | 58  | 49 | 10 |
| 0 | 0  | 0  | 60  | 0   | 13 | 0  |
| 0 | 0  | 0  | 187 | 65  | 24 | 0  |
| 0 | 0  | 0  | 29  | 0   | 0  | 0  |
| 0 | 0  | 0  | 68  | 0   | 0  | 68 |
| 0 | 0  | 0  | 10  | 39  | 0  | 0  |
| 0 | 0  | 10 | 33  | 0   | 0  | 56 |
| 0 | 0  | 0  | 21  | 39  | 0  | 15 |
| 0 | 0  | 0  | 53  | 0   | 0  | 0  |
| 0 | 0  | 0  | 17  | 0   | 0  | 0  |
| 0 | 0  | 0  | 21  | 0   | 0  | 0  |
| 0 | 0  | 0  | 119 | 132 | 13 | 0  |
| 0 | 0  | 0  | 69  | 203 | 0  | 0  |
| 0 | 0  | 0  | 18  | 0   | 0  | 0  |
| 0 | 0  | 0  | 69  | 88  | 41 | 0  |
| 0 | 0  | 0  | 84  | 64  | 0  | 0  |
| 0 | 0  | 0  | 94  | 0   | 0  | 0  |
| 0 | 0  | 0  | 11  | 0   | 0  | 0  |
| 0 | 0  | 0  | 31  | 0   | 0  | 0  |
| 0 | 0  | 0  | 10  | 0   | 0  | 0  |

|     |    |     |     |     |     |     |
|-----|----|-----|-----|-----|-----|-----|
| 10  | 0  | 0   | 11  | 0   | 13  | 0   |
| 0   | 0  | 0   | 35  | 53  | 170 | 0   |
| 0   | 0  | 0   | 43  | 0   | 0   | 0   |
| 0   | 0  | 0   | 11  | 0   | 0   | 0   |
| 0   | 0  | 0   | 28  | 0   | 31  | 0   |
| 0   | 0  | 0   | 15  | 173 | 0   | 0   |
| 0   | 0  | 0   | 56  | 0   | 0   | 0   |
| 0   | 0  | 0   | 13  | 0   | 0   | 0   |
| 0   | 0  | 0   | 247 | 32  | 78  | 10  |
| 0   | 14 | 13  | 60  | 491 | 0   | 164 |
| 0   | 0  | 0   | 50  | 701 | 0   | 0   |
| 0   | 61 | 0   | 40  | 0   | 0   | 96  |
| 0   | 0  | 0   | 27  | 0   | 0   | 0   |
| 0   | 0  | 0   | 89  | 0   | 0   | 0   |
| 0   | 0  | 0   | 14  | 0   | 0   | 0   |
| 0   | 0  | 0   | 73  | 0   | 0   | 0   |
| 17  | 0  | 11  | 72  | 375 | 0   | 105 |
| 0   | 0  | 0   | 18  | 205 | 0   | 0   |
| 0   | 0  | 0   | 76  | 62  | 0   | 0   |
| 0   | 0  | 0   | 32  | 84  | 0   | 0   |
| 0   | 0  | 0   | 12  | 158 | 23  | 0   |
| 0   | 0  | 12  | 20  | 0   | 0   | 0   |
| 0   | 0  | 0   | 46  | 0   | 0   | 0   |
| 0   | 0  | 0   | 12  | 0   | 0   | 0   |
| 0   | 0  | 0   | 11  | 0   | 0   | 0   |
| 101 | 33 | 54  | 10  | 24  | 0   | 13  |
| 0   | 0  | 0   | 14  | 0   | 0   | 0   |
| 0   | 0  | 11  | 30  | 0   | 0   | 12  |
| 0   | 0  | 0   | 85  | 0   | 0   | 0   |
| 0   | 0  | 0   | 43  | 0   | 0   | 0   |
| 0   | 0  | 0   | 28  | 0   | 0   | 0   |
| 0   | 0  | 0   | 353 | 0   | 0   | 0   |
| 0   | 0  | 0   | 109 | 0   | 0   | 0   |
| 0   | 0  | 0   | 16  | 0   | 0   | 0   |
| 0   | 0  | 0   | 85  | 0   | 0   | 0   |
| 0   | 0  | 0   | 14  | 0   | 0   | 0   |
| 70  | 0  | 0   | 10  | 60  | 0   | 32  |
| 611 | 96 | 259 | 35  | 160 | 21  | 139 |
| 0   | 0  | 0   | 12  | 0   | 0   | 0   |
| 94  | 38 | 81  | 12  | 42  | 0   | 23  |
| 0   | 0  | 0   | 12  | 0   | 0   | 0   |
| 0   | 0  | 0   | 13  | 0   | 0   | 63  |
| 0   | 0  | 0   | 36  | 0   | 0   | 0   |
| 0   | 0  | 0   | 11  | 0   | 0   | 0   |
| 0   | 0  | 0   | 40  | 0   | 0   | 0   |
| 0   | 0  | 0   | 31  | 0   | 11  | 13  |

|     |     |     |     |      |     |     |
|-----|-----|-----|-----|------|-----|-----|
| 0   | 0   | 0   | 11  | 0    | 0   | 0   |
| 0   | 0   | 0   | 11  | 0    | 0   | 0   |
| 20  | 0   | 10  | 10  | 64   | 0   | 30  |
| 10  | 0   | 0   | 21  | 0    | 0   | 54  |
| 0   | 0   | 0   | 22  | 31   | 0   | 0   |
| 10  | 0   | 0   | 10  | 13   | 0   | 0   |
| 0   | 0   | 0   | 22  | 0    | 0   | 0   |
| 111 | 235 | 0   | 33  | 1573 | 0   | 320 |
| 0   | 0   | 0   | 14  | 0    | 0   | 0   |
| 0   | 53  | 0   | 30  | 44   | 0   | 89  |
| 0   | 40  | 14  | 54  | 28   | 0   | 510 |
| 0   | 0   | 0   | 32  | 0    | 0   | 0   |
| 0   | 0   | 0   | 44  | 0    | 0   | 0   |
| 0   | 0   | 0   | 23  | 0    | 0   | 0   |
| 0   | 0   | 0   | 45  | 0    | 0   | 0   |
| 0   | 0   | 0   | 15  | 0    | 0   | 0   |
| 0   | 0   | 0   | 11  | 0    | 12  | 0   |
| 0   | 0   | 0   | 10  | 0    | 0   | 0   |
| 0   | 0   | 0   | 41  | 0    | 0   | 0   |
| 16  | 0   | 0   | 43  | 0    | 25  | 28  |
| 0   | 0   | 0   | 13  | 0    | 0   | 0   |
| 0   | 0   | 0   | 23  | 0    | 16  | 74  |
| 0   | 0   | 0   | 13  | 11   | 0   | 0   |
| 0   | 0   | 0   | 14  | 32   | 0   | 0   |
| 0   | 0   | 0   | 21  | 0    | 0   | 0   |
| 0   | 0   | 0   | 14  | 0    | 0   | 0   |
| 0   | 0   | 0   | 44  | 0    | 0   | 41  |
| 0   | 0   | 0   | 43  | 55   | 0   | 15  |
| 0   | 0   | 0   | 32  | 0    | 0   | 0   |
| 0   | 0   | 0   | 10  | 0    | 0   | 0   |
| 0   | 0   | 0   | 75  | 67   | 0   | 0   |
| 0   | 0   | 0   | 88  | 24   | 11  | 24  |
| 0   | 0   | 0   | 11  | 0    | 0   | 0   |
| 0   | 0   | 0   | 15  | 0    | 0   | 0   |
| 0   | 68  | 0   | 233 | 1137 | 225 | 283 |
| 0   | 216 | 0   | 15  | 0    | 252 | 10  |
| 0   | 0   | 0   | 20  | 0    | 0   | 0   |
| 0   | 0   | 0   | 10  | 0    | 36  | 0   |
| 0   | 14  | 0   | 211 | 2068 | 95  | 23  |
| 0   | 0   | 0   | 41  | 23   | 0   | 10  |
| 0   | 0   | 0   | 22  | 10   | 0   | 0   |
| 0   | 0   | 0   | 82  | 104  | 0   | 0   |
| 0   | 0   | 0   | 26  | 0    | 0   | 0   |
| 0   | 0   | 125 | 10  | 0    | 0   | 0   |
| 0   | 0   | 0   | 173 | 285  | 0   | 0   |
| 0   | 0   | 0   | 36  | 169  | 59  | 159 |

|    |    |     |     |      |    |     |
|----|----|-----|-----|------|----|-----|
| 0  | 0  | 0   | 403 | 349  | 0  | 135 |
| 0  | 0  | 0   | 38  | 23   | 0  | 11  |
| 0  | 0  | 0   | 17  | 0    | 0  | 0   |
| 0  | 0  | 0   | 119 | 0    | 0  | 0   |
| 0  | 0  | 0   | 48  | 0    | 0  | 0   |
| 0  | 0  | 0   | 85  | 10   | 15 | 0   |
| 0  | 0  | 0   | 28  | 0    | 0  | 0   |
| 0  | 0  | 0   | 71  | 0    | 0  | 0   |
| 0  | 0  | 0   | 52  | 0    | 0  | 0   |
| 0  | 0  | 23  | 25  | 0    | 0  | 0   |
| 0  | 0  | 139 | 17  | 0    | 0  | 0   |
| 0  | 0  | 0   | 54  | 0    | 0  | 0   |
| 0  | 0  | 347 | 27  | 0    | 0  | 0   |
| 0  | 0  | 273 | 94  | 0    | 0  | 0   |
| 0  | 0  | 239 | 144 | 0    | 15 | 0   |
| 0  | 0  | 0   | 66  | 0    | 0  | 0   |
| 0  | 0  | 0   | 22  | 32   | 0  | 0   |
| 0  | 0  | 0   | 63  | 0    | 0  | 0   |
| 0  | 0  | 0   | 11  | 0    | 0  | 0   |
| 0  | 0  | 0   | 10  | 0    | 0  | 0   |
| 0  | 0  | 0   | 11  | 0    | 0  | 0   |
| 0  | 0  | 0   | 13  | 0    | 0  | 0   |
| 0  | 0  | 0   | 189 | 0    | 0  | 0   |
| 0  | 0  | 0   | 26  | 1386 | 0  | 0   |
| 0  | 0  | 0   | 87  | 104  | 0  | 74  |
| 63 | 39 | 0   | 164 | 498  | 0  | 46  |
| 0  | 0  | 0   | 21  | 36   | 0  | 0   |
| 0  | 0  | 0   | 11  | 219  | 0  | 0   |
| 0  | 0  | 0   | 29  | 0    | 0  | 0   |
| 0  | 0  | 0   | 216 | 0    | 29 | 0   |
| 0  | 0  | 0   | 18  | 0    | 0  | 0   |
| 0  | 0  | 0   | 25  | 108  | 0  | 0   |
| 0  | 0  | 0   | 47  | 0    | 0  | 0   |
| 0  | 0  | 0   | 37  | 0    | 0  | 0   |
| 0  | 0  | 0   | 24  | 0    | 0  | 12  |
| 0  | 0  | 0   | 71  | 13   | 0  | 11  |
| 0  | 0  | 0   | 44  | 0    | 0  | 0   |
| 0  | 0  | 0   | 11  | 112  | 0  | 0   |
| 0  | 0  | 0   | 13  | 65   | 0  | 0   |
| 0  | 0  | 0   | 14  | 0    | 0  | 0   |
| 35 | 77 | 0   | 260 | 1809 | 72 | 234 |
| 0  | 0  | 0   | 138 | 0    | 11 | 13  |
| 44 | 0  | 0   | 21  | 59   | 0  | 0   |
| 0  | 0  | 0   | 39  | 0    | 0  | 97  |
| 0  | 0  | 0   | 89  | 0    | 0  | 0   |
| 0  | 0  | 0   | 201 | 0    | 0  | 0   |

|     |    |    |     |      |    |     |
|-----|----|----|-----|------|----|-----|
| 0   | 0  | 0  | 43  | 0    | 0  | 0   |
| 0   | 0  | 0  | 10  | 0    | 0  | 0   |
| 0   | 0  | 0  | 150 | 187  | 0  | 12  |
| 0   | 0  | 0  | 23  | 12   | 0  | 0   |
| 0   | 0  | 0  | 111 | 21   | 0  | 0   |
| 0   | 0  | 0  | 63  | 285  | 10 | 0   |
| 0   | 0  | 0  | 652 | 0    | 0  | 0   |
| 0   | 0  | 0  | 101 | 10   | 0  | 0   |
| 0   | 0  | 18 | 202 | 68   | 0  | 12  |
| 0   | 0  | 0  | 10  | 0    | 0  | 0   |
| 0   | 10 | 0  | 94  | 0    | 0  | 0   |
| 0   | 0  | 0  | 29  | 0    | 0  | 0   |
| 0   | 55 | 0  | 16  | 0    | 20 | 83  |
| 0   | 0  | 0  | 10  | 0    | 0  | 11  |
| 40  | 0  | 0  | 58  | 5185 | 0  | 38  |
| 0   | 0  | 0  | 44  | 239  | 0  | 0   |
| 29  | 29 | 0  | 14  | 100  | 0  | 90  |
| 0   | 0  | 0  | 61  | 2934 | 0  | 202 |
| 0   | 0  | 0  | 10  | 0    | 0  | 0   |
| 0   | 0  | 0  | 10  | 71   | 0  | 0   |
| 0   | 0  | 0  | 10  | 149  | 0  | 0   |
| 23  | 0  | 0  | 321 | 1219 | 15 | 26  |
| 0   | 0  | 0  | 16  | 0    | 0  | 0   |
| 0   | 0  | 0  | 117 | 0    | 0  | 0   |
| 0   | 0  | 0  | 11  | 0    | 0  | 0   |
| 0   | 0  | 0  | 10  | 0    | 0  | 0   |
| 0   | 0  | 0  | 26  | 0    | 0  | 0   |
| 116 | 27 | 67 | 157 | 391  | 28 | 244 |
| 11  | 0  | 0  | 12  | 20   | 0  | 0   |
| 0   | 0  | 0  | 58  | 26   | 0  | 0   |
| 31  | 0  | 0  | 285 | 208  | 13 | 0   |
| 0   | 0  | 0  | 65  | 188  | 0  | 0   |
| 0   | 0  | 0  | 133 | 163  | 0  | 0   |
| 0   | 0  | 0  | 180 | 0    | 0  | 0   |
| 0   | 0  | 0  | 257 | 0    | 0  | 0   |
| 0   | 0  | 0  | 107 | 0    | 0  | 0   |
| 0   | 0  | 0  | 87  | 0    | 0  | 0   |
| 0   | 0  | 0  | 49  | 63   | 0  | 32  |
| 0   | 0  | 0  | 11  | 0    | 99 | 76  |
| 0   | 0  | 0  | 10  | 0    | 0  | 0   |
| 0   | 0  | 0  | 27  | 210  | 0  | 62  |
| 0   | 0  | 0  | 97  | 47   | 30 | 0   |
| 0   | 0  | 0  | 11  | 48   | 0  | 0   |
| 0   | 0  | 0  | 433 | 111  | 0  | 0   |
| 0   | 0  | 0  | 226 | 0    | 51 | 0   |
| 0   | 0  | 0  | 19  | 10   | 0  | 0   |



|    |    |    |     |     |    |     |
|----|----|----|-----|-----|----|-----|
| 0  | 0  | 0  | 454 | 137 | 25 | 0   |
| 0  | 0  | 0  | 31  | 0   | 0  | 0   |
| 0  | 0  | 0  | 39  | 0   | 11 | 0   |
| 0  | 0  | 0  | 122 | 0   | 0  | 0   |
| 0  | 0  | 0  | 22  | 0   | 34 | 0   |
| 0  | 0  | 0  | 112 | 0   | 12 | 0   |
| 0  | 0  | 0  | 34  | 0   | 0  | 24  |
| 0  | 0  | 0  | 34  | 0   | 0  | 0   |
| 0  | 0  | 0  | 54  | 111 | 0  | 74  |
| 48 | 0  | 0  | 39  | 104 | 0  | 23  |
| 0  | 0  | 0  | 51  | 10  | 0  | 0   |
| 0  | 0  | 0  | 44  | 48  | 0  | 42  |
| 0  | 0  | 0  | 17  | 21  | 0  | 0   |
| 0  | 0  | 0  | 58  | 0   | 0  | 0   |
| 0  | 0  | 0  | 47  | 32  | 0  | 46  |
| 0  | 0  | 0  | 160 | 0   | 0  | 0   |
| 0  | 0  | 0  | 66  | 0   | 0  | 0   |
| 0  | 0  | 0  | 13  | 0   | 0  | 0   |
| 0  | 0  | 0  | 0   | 163 | 0  | 288 |
| 25 | 0  | 0  | 0   | 34  | 0  | 0   |
| 0  | 0  | 0  | 0   | 48  | 0  | 0   |
| 0  | 0  | 0  | 0   | 95  | 0  | 24  |
| 11 | 0  | 0  | 0   | 0   | 0  | 163 |
| 0  | 0  | 0  | 0   | 0   | 0  | 0   |
| 0  | 0  | 0  | 0   | 0   | 28 | 0   |
| 0  | 0  | 0  | 0   | 82  | 0  | 0   |
| 0  | 0  | 0  | 0   | 14  | 0  | 0   |
| 0  | 0  | 0  | 0   | 180 | 0  | 0   |
| 0  | 0  | 0  | 0   | 0   | 0  | 0   |
| 0  | 0  | 0  | 0   | 0   | 0  | 0   |
| 0  | 0  | 0  | 0   | 10  | 0  | 0   |
| 0  | 0  | 0  | 0   | 262 | 0  | 0   |
| 26 | 0  | 0  | 0   | 0   | 50 | 52  |
| 0  | 0  | 0  | 0   | 0   | 0  | 0   |
| 0  | 0  | 0  | 0   | 0   | 0  | 0   |
| 0  | 0  | 27 | 0   | 62  | 0  | 68  |
| 0  | 0  | 0  | 0   | 29  | 0  | 12  |
| 11 | 0  | 0  | 0   | 0   | 15 | 0   |
| 0  | 0  | 0  | 0   | 0   | 0  | 0   |
| 0  | 0  | 0  | 0   | 61  | 0  | 0   |
| 0  | 0  | 0  | 0   | 299 | 0  | 0   |
| 0  | 0  | 0  | 0   | 74  | 0  | 0   |
| 0  | 0  | 0  | 0   | 31  | 0  | 0   |
| 0  | 0  | 0  | 0   | 86  | 0  | 0   |
| 0  | 0  | 0  | 0   | 345 | 11 | 26  |
| 0  | 17 | 0  | 0   | 10  | 31 | 0   |

|    |    |    |   |      |     |      |
|----|----|----|---|------|-----|------|
| 0  | 0  | 0  | 0 | 75   | 0   | 0    |
| 0  | 0  | 0  | 0 | 109  | 0   | 0    |
| 0  | 0  | 0  | 0 | 1292 | 0   | 38   |
| 93 | 17 | 41 | 0 | 375  | 0   | 0    |
| 0  | 66 | 0  | 0 | 283  | 65  | 946  |
| 0  | 0  | 0  | 0 | 963  | 0   | 0    |
| 0  | 0  | 0  | 0 | 0    | 0   | 0    |
| 0  | 0  | 0  | 0 | 137  | 0   | 0    |
| 0  | 0  | 0  | 0 | 0    | 0   | 0    |
| 0  | 0  | 0  | 0 | 0    | 0   | 0    |
| 0  | 0  | 0  | 0 | 329  | 0   | 0    |
| 0  | 0  | 0  | 0 | 88   | 0   | 0    |
| 0  | 0  | 0  | 0 | 61   | 0   | 0    |
| 0  | 0  | 0  | 0 | 0    | 0   | 0    |
| 0  | 0  | 0  | 0 | 22   | 0   | 10   |
| 0  | 0  | 0  | 0 | 0    | 0   | 0    |
| 0  | 0  | 0  | 0 | 0    | 0   | 0    |
| 0  | 0  | 0  | 0 | 13   | 0   | 0    |
| 0  | 0  | 0  | 0 | 0    | 21  | 0    |
| 0  | 0  | 0  | 0 | 0    | 0   | 0    |
| 0  | 0  | 0  | 0 | 10   | 0   | 0    |
| 0  | 0  | 0  | 0 | 0    | 0   | 0    |
| 0  | 0  | 0  | 0 | 25   | 0   | 23   |
| 0  | 0  | 0  | 0 | 0    | 23  | 0    |
| 0  | 0  | 0  | 0 | 0    | 105 | 20   |
| 0  | 0  | 0  | 0 | 14   | 0   | 293  |
| 0  | 29 | 0  | 0 | 42   | 0   | 51   |
| 0  | 0  | 0  | 0 | 0    | 0   | 0    |
| 0  | 0  | 0  | 0 | 0    | 0   | 0    |
| 0  | 0  | 0  | 0 | 0    | 11  | 0    |
| 0  | 0  | 0  | 0 | 0    | 0   | 0    |
| 0  | 0  | 0  | 0 | 10   | 0   | 0    |
| 0  | 0  | 0  | 0 | 0    | 0   | 0    |
| 0  | 0  | 0  | 0 | 0    | 55  | 378  |
| 0  | 55 | 0  | 0 | 0    | 84  | 0    |
| 0  | 0  | 0  | 0 | 0    | 242 | 0    |
| 0  | 0  | 0  | 0 | 0    | 45  | 0    |
| 0  | 0  | 0  | 0 | 0    | 0   | 0    |
| 0  | 0  | 0  | 0 | 0    | 0   | 37   |
| 0  | 0  | 0  | 0 | 0    | 0   | 12   |
| 0  | 0  | 11 | 0 | 0    | 0   | 1473 |
| 0  | 0  | 0  | 0 | 0    | 0   | 0    |
| 0  | 0  | 0  | 0 | 0    | 0   | 0    |
| 0  | 0  | 0  | 0 | 0    | 19  | 0    |
| 0  | 0  | 0  | 0 | 0    | 21  | 0    |
| 0  | 0  | 0  | 0 | 0    | 0   | 0    |

[illegible]

[illegible]

|    |   |   |   |     |   |    |
|----|---|---|---|-----|---|----|
| 0  | 0 | 0 | 0 | 0   | 0 | 0  |
| 0  | 0 | 0 | 0 | 0   | 0 | 0  |
| 0  | 0 | 0 | 0 | 0   | 0 | 0  |
| 0  | 0 | 0 | 0 | 0   | 0 | 0  |
| 0  | 0 | 0 | 0 | 0   | 0 | 0  |
| 0  | 0 | 0 | 0 | 0   | 0 | 0  |
| 0  | 0 | 0 | 0 | 0   | 0 | 0  |
| 0  | 0 | 0 | 0 | 0   | 0 | 0  |
| 30 | 0 | 0 | 0 | 16  | 0 | 0  |
| 0  | 0 | 0 | 0 | 0   | 0 | 0  |
| 0  | 0 | 0 | 0 | 0   | 0 | 0  |
| 0  | 0 | 0 | 0 | 0   | 0 | 0  |
| 0  | 0 | 0 | 0 | 0   | 0 | 0  |
| 0  | 0 | 0 | 0 | 0   | 0 | 0  |
| 0  | 0 | 0 | 0 | 0   | 0 | 0  |
| 0  | 0 | 0 | 0 | 0   | 0 | 0  |
| 0  | 0 | 0 | 0 | 0   | 0 | 0  |
| 0  | 0 | 0 | 0 | 165 | 0 | 0  |
| 0  | 0 | 0 | 0 | 0   | 0 | 0  |
| 0  | 0 | 0 | 0 | 0   | 0 | 0  |
| 0  | 0 | 0 | 0 | 0   | 0 | 0  |
| 0  | 0 | 0 | 0 | 0   | 0 | 0  |
| 0  | 0 | 0 | 0 | 0   | 0 | 0  |
| 0  | 0 | 0 | 0 | 0   | 0 | 0  |
| 0  | 0 | 0 | 0 | 0   | 0 | 0  |
| 0  | 0 | 0 | 0 | 0   | 0 | 0  |
| 0  | 0 | 0 | 0 | 0   | 0 | 0  |
| 0  | 0 | 0 | 0 | 0   | 0 | 0  |
| 0  | 0 | 0 | 0 | 0   | 0 | 0  |
| 0  | 0 | 0 | 0 | 0   | 0 | 0  |
| 0  | 0 | 0 | 0 | 0   | 0 | 0  |
| 0  | 0 | 0 | 0 | 0   | 0 | 0  |
| 0  | 0 | 0 | 0 | 0   | 0 | 0  |
| 0  | 0 | 0 | 0 | 0   | 0 | 0  |
| 0  | 0 | 0 | 0 | 0   | 0 | 0  |
| 0  | 0 | 0 | 0 | 0   | 0 | 10 |
| 0  | 0 | 0 | 0 | 0   | 0 | 0  |
| 0  | 0 | 0 | 0 | 0   | 0 | 0  |
| 0  | 0 | 0 | 0 | 0   | 0 | 0  |
| 0  | 0 | 0 | 0 | 0   | 0 | 0  |
| 0  | 0 | 0 | 0 | 0   | 0 | 0  |
| 0  | 0 | 0 | 0 | 0   | 0 | 0  |
| 0  | 0 | 0 | 0 | 0   | 0 | 0  |
| 0  | 0 | 0 | 0 | 0   | 0 | 0  |
| 0  | 0 | 0 | 0 | 0   | 0 | 0  |
| 0  | 0 | 0 | 0 | 0   | 0 | 0  |
| 0  | 0 | 0 | 0 | 0   | 0 | 0  |
| 0  | 0 | 0 | 0 | 0   | 0 | 0  |
| 0  | 0 | 0 | 0 | 48  | 0 | 0  |
| 0  | 0 | 0 | 0 | 0   | 0 | 0  |

|   |    |    |   |    |     |     |
|---|----|----|---|----|-----|-----|
| 0 | 0  | 0  | 0 | 0  | 0   | 0   |
| 0 | 0  | 0  | 0 | 0  | 0   | 0   |
| 0 | 0  | 0  | 0 | 0  | 11  | 0   |
| 0 | 0  | 0  | 0 | 0  | 0   | 0   |
| 0 | 0  | 0  | 0 | 0  | 0   | 0   |
| 0 | 0  | 0  | 0 | 0  | 0   | 0   |
| 0 | 0  | 0  | 0 | 0  | 0   | 0   |
| 0 | 0  | 0  | 0 | 0  | 0   | 0   |
| 0 | 0  | 0  | 0 | 0  | 0   | 0   |
| 0 | 0  | 0  | 0 | 0  | 0   | 0   |
| 0 | 0  | 0  | 0 | 0  | 0   | 0   |
| 0 | 0  | 0  | 0 | 0  | 0   | 0   |
| 0 | 0  | 0  | 0 | 11 | 0   | 0   |
| 0 | 0  | 0  | 0 | 0  | 0   | 0   |
| 0 | 0  | 0  | 0 | 0  | 0   | 0   |
| 0 | 0  | 0  | 0 | 0  | 0   | 0   |
| 0 | 0  | 0  | 0 | 0  | 0   | 0   |
| 0 | 0  | 0  | 0 | 12 | 0   | 0   |
| 0 | 0  | 0  | 0 | 47 | 0   | 23  |
| 0 | 0  | 0  | 0 | 0  | 0   | 169 |
| 0 | 0  | 0  | 0 | 10 | 0   | 0   |
| 0 | 0  | 0  | 0 | 54 | 0   | 0   |
| 0 | 0  | 0  | 0 | 0  | 0   | 13  |
| 0 | 0  | 0  | 0 | 12 | 0   | 0   |
| 0 | 0  | 0  | 0 | 10 | 0   | 0   |
| 0 | 67 | 0  | 0 | 0  | 0   | 11  |
| 0 | 0  | 0  | 0 | 0  | 150 | 40  |
| 0 | 0  | 0  | 0 | 0  | 0   | 0   |
| 0 | 0  | 0  | 0 | 0  | 0   | 0   |
| 0 | 0  | 0  | 0 | 44 | 0   | 0   |
| 0 | 0  | 0  | 0 | 0  | 0   | 0   |
| 0 | 0  | 0  | 0 | 0  | 0   | 0   |
| 0 | 49 | 0  | 0 | 0  | 716 | 75  |
| 0 | 0  | 0  | 0 | 0  | 0   | 0   |
| 0 | 0  | 0  | 0 | 49 | 0   | 0   |
| 0 | 0  | 0  | 0 | 0  | 0   | 11  |
| 0 | 0  | 14 | 0 | 0  | 0   | 0   |
| 0 | 0  | 0  | 0 | 0  | 0   | 0   |
| 0 | 0  | 0  | 0 | 0  | 0   | 0   |
| 0 | 0  | 0  | 0 | 0  | 0   | 0   |
| 0 | 0  | 0  | 0 | 0  | 0   | 0   |
| 0 | 0  | 0  | 0 | 0  | 0   | 0   |
| 0 | 0  | 0  | 0 | 0  | 0   | 0   |
| 0 | 0  | 0  | 0 | 0  | 0   | 0   |
| 0 | 0  | 0  | 0 | 0  | 0   | 0   |
| 0 | 0  | 0  | 0 | 0  | 0   | 0   |
| 0 | 0  | 90 | 0 | 11 | 0   | 10  |
| 0 | 0  | 0  | 0 | 0  | 0   | 0   |
| 0 | 0  | 0  | 0 | 0  | 0   | 0   |
| 0 | 0  | 0  | 0 | 31 | 0   | 0   |

|    |    |    |   |    |    |    |
|----|----|----|---|----|----|----|
| 0  | 0  | 0  | 0 | 31 | 0  | 0  |
| 0  | 0  | 0  | 0 | 0  | 0  | 0  |
| 0  | 0  | 0  | 0 | 53 | 0  | 0  |
| 0  | 0  | 0  | 0 | 0  | 0  | 0  |
| 0  | 0  | 0  | 0 | 0  | 0  | 0  |
| 0  | 0  | 0  | 0 | 0  | 0  | 0  |
| 0  | 0  | 0  | 0 | 11 | 0  | 0  |
| 0  | 0  | 0  | 0 | 0  | 0  | 0  |
| 0  | 0  | 0  | 0 | 0  | 0  | 0  |
| 0  | 0  | 0  | 0 | 0  | 0  | 0  |
| 0  | 0  | 0  | 0 | 0  | 0  | 0  |
| 0  | 0  | 0  | 0 | 0  | 0  | 0  |
| 0  | 0  | 0  | 0 | 0  | 0  | 0  |
| 0  | 0  | 0  | 0 | 0  | 0  | 0  |
| 0  | 0  | 0  | 0 | 10 | 0  | 0  |
| 0  | 0  | 0  | 0 | 0  | 0  | 0  |
| 0  | 0  | 0  | 0 | 37 | 0  | 0  |
| 0  | 0  | 0  | 0 | 0  | 0  | 0  |
| 0  | 0  | 0  | 0 | 0  | 0  | 0  |
| 0  | 0  | 0  | 0 | 0  | 0  | 0  |
| 0  | 0  | 0  | 0 | 0  | 0  | 0  |
| 0  | 0  | 0  | 0 | 0  | 0  | 0  |
| 0  | 0  | 0  | 0 | 0  | 0  | 0  |
| 0  | 0  | 0  | 0 | 0  | 0  | 0  |
| 0  | 0  | 0  | 0 | 0  | 0  | 0  |
| 0  | 0  | 0  | 0 | 0  | 0  | 0  |
| 0  | 0  | 0  | 0 | 0  | 0  | 0  |
| 0  | 0  | 0  | 0 | 10 | 0  | 0  |
| 0  | 0  | 0  | 0 | 0  | 0  | 0  |
| 0  | 0  | 0  | 0 | 0  | 0  | 0  |
| 0  | 0  | 0  | 0 | 38 | 0  | 0  |
| 0  | 0  | 0  | 0 | 0  | 0  | 0  |
| 0  | 0  | 0  | 0 | 0  | 59 | 0  |
| 0  | 0  | 0  | 0 | 10 | 0  | 0  |
| 0  | 0  | 0  | 0 | 0  | 0  | 0  |
| 10 | 0  | 0  | 0 | 0  | 0  | 85 |
| 0  | 0  | 0  | 0 | 0  | 0  | 0  |
| 0  | 0  | 10 | 0 | 0  | 0  | 0  |
| 0  | 0  | 0  | 0 | 0  | 0  | 0  |
| 48 | 12 | 40 | 0 | 13 | 0  | 18 |
| 0  | 0  | 0  | 0 | 0  | 0  | 0  |
| 12 | 0  | 0  | 0 | 0  | 0  | 0  |
| 0  | 0  | 0  | 0 | 0  | 0  | 0  |
| 0  | 0  | 0  | 0 | 0  | 0  | 87 |
| 0  | 0  | 0  | 0 | 0  | 0  | 0  |
| 0  | 0  | 0  | 0 | 10 | 0  | 0  |
| 0  | 0  | 0  | 0 | 0  | 0  | 0  |
| 24 | 0  | 26 | 0 | 11 | 0  | 10 |

[illegible]



[illegible]

[illegible]

[illegible]

|   |     |   |   |    |    |     |
|---|-----|---|---|----|----|-----|
| 0 | 0   | 0 | 0 | 0  | 0  | 0   |
| 0 | 0   | 0 | 0 | 16 | 0  | 0   |
| 0 | 0   | 0 | 0 | 0  | 0  | 0   |
| 0 | 0   | 0 | 0 | 0  | 0  | 0   |
| 0 | 0   | 0 | 0 | 0  | 0  | 0   |
| 0 | 0   | 0 | 0 | 0  | 0  | 0   |
| 0 | 0   | 0 | 0 | 0  | 0  | 11  |
| 0 | 0   | 0 | 0 | 0  | 0  | 0   |
| 0 | 0   | 0 | 0 | 0  | 0  | 0   |
| 0 | 0   | 0 | 0 | 0  | 0  | 0   |
| 0 | 0   | 0 | 0 | 0  | 0  | 20  |
| 0 | 0   | 0 | 0 | 0  | 0  | 0   |
| 0 | 0   | 0 | 0 | 0  | 0  | 0   |
| 0 | 0   | 0 | 0 | 0  | 0  | 0   |
| 0 | 0   | 0 | 0 | 0  | 0  | 0   |
| 0 | 0   | 0 | 0 | 0  | 0  | 0   |
| 0 | 10  | 0 | 0 | 0  | 0  | 80  |
| 0 | 0   | 0 | 0 | 0  | 36 | 55  |
| 0 | 0   | 0 | 0 | 0  | 0  | 0   |
| 0 | 0   | 0 | 0 | 0  | 10 | 0   |
| 0 | 0   | 0 | 0 | 0  | 0  | 0   |
| 0 | 0   | 0 | 0 | 0  | 0  | 13  |
| 0 | 0   | 0 | 0 | 10 | 0  | 0   |
| 0 | 0   | 0 | 0 | 0  | 0  | 0   |
| 0 | 0   | 0 | 0 | 0  | 0  | 29  |
| 0 | 0   | 0 | 0 | 0  | 0  | 0   |
| 0 | 48  | 0 | 0 | 0  | 0  | 645 |
| 0 | 0   | 0 | 0 | 12 | 0  | 0   |
| 0 | 0   | 0 | 0 | 0  | 11 | 0   |
| 0 | 0   | 0 | 0 | 0  | 0  | 0   |
| 0 | 0   | 0 | 0 | 0  | 0  | 0   |
| 0 | 0   | 0 | 0 | 0  | 0  | 0   |
| 0 | 0   | 0 | 0 | 0  | 0  | 0   |
| 0 | 0   | 0 | 0 | 0  | 0  | 0   |
| 0 | 0   | 0 | 0 | 0  | 0  | 0   |
| 0 | 0   | 0 | 0 | 0  | 0  | 0   |
| 0 | 0   | 0 | 0 | 0  | 0  | 0   |
| 0 | 0   | 0 | 0 | 16 | 0  | 0   |
| 0 | 0   | 0 | 0 | 0  | 0  | 15  |
| 0 | 0   | 0 | 0 | 0  | 10 | 0   |
| 0 | 10  | 0 | 0 | 0  | 0  | 0   |
| 0 | 0   | 0 | 0 | 0  | 0  | 35  |
| 0 | 0   | 0 | 0 | 0  | 0  | 0   |
| 0 | 68  | 0 | 0 | 0  | 0  | 0   |
| 0 | 153 | 0 | 0 | 0  | 24 | 14  |
| 0 | 11  | 0 | 0 | 0  | 0  | 17  |

[illegible]

[illegible]

|     |    |   |   |    |    |    |
|-----|----|---|---|----|----|----|
| 0   | 0  | 0 | 0 | 0  | 0  | 0  |
| 40  | 0  | 0 | 0 | 0  | 0  | 0  |
| 120 | 0  | 0 | 0 | 0  | 0  | 0  |
| 0   | 0  | 0 | 0 | 0  | 0  | 0  |
| 0   | 0  | 0 | 0 | 0  | 0  | 0  |
| 0   | 0  | 0 | 0 | 0  | 0  | 0  |
| 0   | 0  | 0 | 0 | 0  | 0  | 0  |
| 0   | 0  | 0 | 0 | 0  | 0  | 0  |
| 0   | 0  | 0 | 0 | 0  | 0  | 11 |
| 0   | 0  | 0 | 0 | 0  | 0  | 15 |
| 0   | 0  | 0 | 0 | 0  | 0  | 0  |
| 0   | 0  | 0 | 0 | 0  | 0  | 0  |
| 0   | 39 | 0 | 0 | 0  | 0  | 0  |
| 0   | 0  | 0 | 0 | 0  | 0  | 0  |
| 0   | 0  | 0 | 0 | 0  | 0  | 0  |
| 0   | 0  | 0 | 0 | 0  | 0  | 0  |
| 0   | 0  | 0 | 0 | 0  | 0  | 0  |
| 0   | 0  | 0 | 0 | 0  | 0  | 0  |
| 0   | 0  | 0 | 0 | 0  | 0  | 0  |
| 0   | 0  | 0 | 0 | 0  | 0  | 0  |
| 0   | 0  | 0 | 0 | 0  | 0  | 0  |
| 0   | 0  | 0 | 0 | 0  | 0  | 0  |
| 0   | 0  | 0 | 0 | 0  | 0  | 0  |
| 0   | 0  | 0 | 0 | 0  | 0  | 0  |
| 0   | 0  | 0 | 0 | 0  | 0  | 0  |
| 0   | 0  | 0 | 0 | 0  | 0  | 0  |
| 0   | 0  | 0 | 0 | 0  | 0  | 0  |
| 0   | 0  | 0 | 0 | 0  | 0  | 0  |
| 0   | 0  | 0 | 0 | 0  | 0  | 0  |
| 0   | 0  | 0 | 0 | 0  | 0  | 0  |
| 0   | 0  | 0 | 0 | 0  | 0  | 0  |
| 0   | 0  | 0 | 0 | 0  | 0  | 30 |
| 0   | 0  | 0 | 0 | 0  | 0  | 0  |
| 0   | 0  | 0 | 0 | 0  | 0  | 0  |
| 0   | 0  | 0 | 0 | 0  | 0  | 10 |
| 0   | 0  | 0 | 0 | 0  | 0  | 0  |
| 0   | 0  | 0 | 0 | 0  | 14 | 0  |
| 0   | 0  | 0 | 0 | 0  | 0  | 0  |
| 0   | 0  | 0 | 0 | 0  | 0  | 0  |
| 0   | 0  | 0 | 0 | 0  | 0  | 0  |
| 0   | 0  | 0 | 0 | 0  | 0  | 0  |
| 0   | 0  | 0 | 0 | 0  | 0  | 0  |
| 0   | 0  | 0 | 0 | 0  | 0  | 0  |
| 0   | 0  | 0 | 0 | 46 | 0  | 0  |
| 0   | 0  | 0 | 0 | 0  | 0  | 0  |
| 0   | 0  | 0 | 0 | 0  | 0  | 0  |
| 0   | 0  | 0 | 0 | 0  | 0  | 18 |
| 0   | 0  | 0 | 0 | 0  | 0  | 0  |
| 0   | 0  | 0 | 0 | 0  | 0  | 0  |

|   |   |   |   |    |   |    |
|---|---|---|---|----|---|----|
| 0 | 0 | 0 | 0 | 0  | 0 | 0  |
| 0 | 0 | 0 | 0 | 0  | 0 | 0  |
| 0 | 0 | 0 | 0 | 10 | 0 | 0  |
| 0 | 0 | 0 | 0 | 25 | 0 | 0  |
| 0 | 0 | 0 | 0 | 10 | 0 | 0  |
| 0 | 0 | 0 | 0 | 15 | 0 | 0  |
| 0 | 0 | 0 | 0 | 23 | 0 | 0  |
| 0 | 0 | 0 | 0 | 10 | 0 | 0  |
| 0 | 0 | 0 | 0 | 11 | 0 | 0  |
| 0 | 0 | 0 | 0 | 12 | 0 | 0  |
| 0 | 0 | 0 | 0 | 10 | 0 | 0  |
| 0 | 0 | 0 | 0 | 11 | 0 | 0  |
| 0 | 0 | 0 | 0 | 27 | 0 | 0  |
| 0 | 0 | 0 | 0 | 27 | 0 | 0  |
| 0 | 0 | 0 | 0 | 10 | 0 | 0  |
| 0 | 0 | 0 | 0 | 12 | 0 | 0  |
| 0 | 0 | 0 | 0 | 25 | 0 | 0  |
| 0 | 0 | 0 | 0 | 44 | 0 | 0  |
| 0 | 0 | 0 | 0 | 68 | 0 | 0  |
| 0 | 0 | 0 | 0 | 17 | 0 | 0  |
| 0 | 0 | 0 | 0 | 28 | 0 | 0  |
| 0 | 0 | 0 | 0 | 55 | 0 | 0  |
| 0 | 0 | 0 | 0 | 25 | 0 | 0  |
| 0 | 0 | 0 | 0 | 12 | 0 | 0  |
| 0 | 0 | 0 | 0 | 10 | 0 | 0  |
| 0 | 0 | 0 | 0 | 12 | 0 | 0  |
| 0 | 0 | 0 | 0 | 55 | 0 | 0  |
| 0 | 0 | 0 | 0 | 38 | 0 | 0  |
| 0 | 0 | 0 | 0 | 18 | 0 | 0  |
| 0 | 0 | 0 | 0 | 29 | 0 | 0  |
| 0 | 0 | 0 | 0 | 15 | 0 | 0  |
| 0 | 0 | 0 | 0 | 55 | 0 | 0  |
| 0 | 0 | 0 | 0 | 10 | 0 | 0  |
| 0 | 0 | 0 | 0 | 11 | 0 | 0  |
| 0 | 0 | 0 | 0 | 21 | 0 | 0  |
| 0 | 0 | 0 | 0 | 10 | 0 | 0  |
| 0 | 0 | 0 | 0 | 0  | 0 | 0  |
| 0 | 0 | 0 | 0 | 0  | 0 | 0  |
| 0 | 0 | 0 | 0 | 0  | 0 | 0  |
| 0 | 0 | 0 | 0 | 0  | 0 | 0  |
| 0 | 0 | 0 | 0 | 0  | 0 | 12 |
| 0 | 0 | 0 | 0 | 0  | 0 | 0  |
| 0 | 0 | 0 | 0 | 0  | 0 | 0  |
| 0 | 0 | 0 | 0 | 0  | 0 | 0  |
| 0 | 0 | 0 | 0 | 0  | 0 | 0  |
| 0 | 0 | 0 | 0 | 0  | 0 | 0  |



[illegible]

[illegible]

[illegible]

[illegible]

[illegible]

|   |   |   |   |   |    |    |
|---|---|---|---|---|----|----|
| 0 | 0 | 0 | 0 | 0 | 0  | 0  |
| 0 | 0 | 0 | 0 | 0 | 0  | 0  |
| 0 | 0 | 0 | 0 | 0 | 0  | 13 |
| 0 | 0 | 0 | 0 | 0 | 0  | 89 |
| 0 | 0 | 0 | 0 | 0 | 0  | 0  |
| 0 | 0 | 0 | 0 | 0 | 0  | 0  |
| 0 | 0 | 0 | 0 | 0 | 0  | 0  |
| 0 | 0 | 0 | 0 | 0 | 10 | 0  |
| 0 | 0 | 0 | 0 | 0 | 0  | 0  |
| 0 | 0 | 0 | 0 | 0 | 0  | 0  |
| 0 | 0 | 0 | 0 | 0 | 0  | 0  |
| 0 | 0 | 0 | 0 | 0 | 0  | 0  |
| 0 | 0 | 0 | 0 | 0 | 0  | 0  |
| 0 | 0 | 0 | 0 | 0 | 0  | 0  |
| 0 | 0 | 0 | 0 | 0 | 0  | 0  |
| 0 | 0 | 0 | 0 | 0 | 89 | 0  |
| 0 | 0 | 0 | 0 | 0 | 0  | 0  |
| 0 | 0 | 0 | 0 | 0 | 0  | 0  |
| 0 | 0 | 0 | 0 | 0 | 0  | 0  |
| 0 | 0 | 0 | 0 | 0 | 0  | 0  |
| 0 | 0 | 0 | 0 | 0 | 0  | 0  |
| 0 | 0 | 0 | 0 | 0 | 0  | 0  |
| 0 | 0 | 0 | 0 | 0 | 10 | 0  |
| 0 | 0 | 0 | 0 | 0 | 0  | 0  |
| 0 | 0 | 0 | 0 | 0 | 0  | 0  |
| 0 | 0 | 0 | 0 | 0 | 0  | 0  |
| 0 | 0 | 0 | 0 | 0 | 0  | 0  |
| 0 | 0 | 0 | 0 | 0 | 0  | 0  |
| 0 | 0 | 0 | 0 | 0 | 0  | 0  |
| 0 | 0 | 0 | 0 | 0 | 0  | 0  |
| 0 | 0 | 0 | 0 | 0 | 0  | 0  |
| 0 | 0 | 0 | 0 | 0 | 0  | 0  |
| 0 | 0 | 0 | 0 | 0 | 0  | 0  |
| 0 | 0 | 0 | 0 | 0 | 0  | 0  |
| 0 | 0 | 0 | 0 | 0 | 28 | 0  |
| 0 | 0 | 0 | 0 | 0 | 0  | 0  |
| 0 | 0 | 0 | 0 | 0 | 0  | 0  |
| 0 | 0 | 0 | 0 | 0 | 0  | 0  |
| 0 | 0 | 0 | 0 | 0 | 0  | 0  |
| 0 | 0 | 0 | 0 | 0 | 0  | 0  |
| 0 | 0 | 0 | 0 | 0 | 0  | 0  |
| 0 | 0 | 0 | 0 | 0 | 0  | 0  |
| 0 | 0 | 0 | 0 | 0 | 13 | 0  |
| 0 | 0 | 0 | 0 | 0 | 0  | 0  |
| 0 | 0 | 0 | 0 | 0 | 0  | 0  |
| 0 | 0 | 0 | 0 | 0 | 0  | 0  |
| 0 | 0 | 0 | 0 | 0 | 0  | 0  |
| 0 | 0 | 0 | 0 | 0 | 0  | 0  |

[illegible]

[illegible]



[illegible]

[illegible]

[illegible]

[illegible]

[illegible]

[illegible]

|        |        |        |        |        |        |        | Pr   |
|--------|--------|--------|--------|--------|--------|--------|------|
| PH_242 | PH_249 | PH_273 | PH_280 | PH_282 | PH_283 | PH_302 |      |
| 0      | 0      | 0      | 27     | 46     | 11     | 0      | 0    |
| 0      | 0      | 0      | 29     | 65     | 74     | 0      | 0    |
| 116    | 81     | 0      | 133    | 385    | 607    | 10     | 10   |
| 43     | 10     | 0      | 123    | 232    | 271    | 22     | 22   |
| 28     | 0      | 0      | 155    | 96     | 144    | 23     | 23   |
| 195    | 0      | 0      | 0      | 0      | 10     | 28     | 28   |
| 61     | 0      | 0      | 12     | 66     | 168    | 0      | 0    |
| 0      | 0      | 0      | 17     | 58     | 74     | 0      | 0    |
| 0      | 0      | 11     | 16     | 162    | 84     | 0      | 0    |
| 60     | 114    | 71     | 196    | 144    | 265    | 14     | 14   |
| 0      | 38     | 0      | 0      | 137    | 87     | 10     | 10   |
| 0      | 0      | 0      | 0      | 17     | 71     | 0      | 0    |
| 0      | 0      | 0      | 59     | 28     | 35     | 0      | 0    |
| 0      | 0      | 0      | 10     | 29     | 10     | 0      | 0    |
| 0      | 15     | 0      | 0      | 64     | 94     | 0      | 0    |
| 0      | 0      | 0      | 0      | 0      | 41     | 0      | 0    |
| 355    | 183    | 42     | 394    | 354    | 208    | 401    | 401  |
| 43     | 0      | 0      | 0      | 0      | 13     | 0      | 0    |
| 0      | 18     | 0      | 21     | 11     | 12     | 35     | 35   |
| 0      | 0      | 25     | 256    | 13     | 17     | 15     | 15   |
| 0      | 0      | 0      | 172    | 0      | 55     | 10     | 10   |
| 0      | 0      | 0      | 76     | 24     | 11     | 34     | 34   |
| 0      | 0      | 0      | 195    | 0      | 22     | 0      | 0    |
| 0      | 0      | 0      | 0      | 0      | 13     | 0      | 0    |
| 332    | 366    | 278    | 302    | 919    | 272    | 159    | 159  |
| 59     | 174    | 145    | 95     | 372    | 64     | 171    | 171  |
| 14     | 113    | 0      | 53     | 183    | 84     | 62     | 62   |
| 14     | 187    | 11     | 49     | 273    | 42     | 29     | 29   |
| 63     | 388    | 37     | 100    | 616    | 117    | 59     | 59   |
| 0      | 11     | 0      | 33     | 85     | 29     | 19     | 19   |
| 0      | 0      | 0      | 15     | 46     | 11     | 0      | 0    |
| 0      | 0      | 0      | 0      | 0      | 12     | 0      | 0    |
| 152    | 711    | 38     | 694    | 1109   | 394    | 467    | 467  |
| 22     | 0      | 0      | 54     | 17     | 10     | 0      | 0    |
| 0      | 0      | 0      | 430    | 0      | 37     | 0      | 0    |
| 0      | 10     | 0      | 203    | 0      | 24     | 0      | 0    |
| 0      | 0      | 0      | 430    | 39     | 14     | 0      | 0    |
| 106    | 31     | 46     | 262    | 95     | 94     | 165    | 165  |
| 11     | 21     | 11     | 40     | 85     | 142    | 71     | 71   |
| 326    | 891    | 114    | 632    | 2058   | 1703   | 1740   | 1740 |
| 0      | 12     | 0      | 71     | 54     | 12     | 106    | 106  |

|      |      |      |     |      |      |      |
|------|------|------|-----|------|------|------|
| 0    | 61   | 0    | 34  | 44   | 96   | 69   |
| 0    | 25   | 0    | 67  | 18   | 12   | 78   |
| 0    | 20   | 0    | 69  | 31   | 43   | 54   |
| 1148 | 435  | 315  | 70  | 809  | 1929 | 682  |
| 126  | 0    | 0    | 68  | 0    | 10   | 11   |
| 0    | 48   | 0    | 0   | 252  | 225  | 11   |
| 73   | 0    | 0    | 0   | 77   | 281  | 11   |
| 0    | 227  | 0    | 0   | 604  | 796  | 134  |
| 0    | 27   | 0    | 0   | 116  | 32   | 45   |
| 0    | 99   | 0    | 0   | 286  | 259  | 30   |
| 0    | 0    | 0    | 0   | 0    | 11   | 0    |
| 0    | 35   | 0    | 0   | 165  | 81   | 85   |
| 65   | 98   | 51   | 0   | 477  | 729  | 183  |
| 0    | 28   | 0    | 0   | 140  | 144  | 35   |
| 0    | 18   | 0    | 0   | 102  | 70   | 45   |
| 0    | 181  | 0    | 0   | 516  | 853  | 23   |
| 0    | 22   | 0    | 0   | 94   | 53   | 0    |
| 83   | 282  | 1142 | 163 | 1706 | 865  | 224  |
| 57   | 51   | 0    | 0   | 195  | 254  | 0    |
| 0    | 10   | 208  | 0   | 153  | 36   | 28   |
| 0    | 0    | 0    | 0   | 67   | 30   | 13   |
| 0    | 0    | 0    | 0   | 74   | 11   | 0    |
| 0    | 0    | 0    | 0   | 43   | 10   | 0    |
| 38   | 0    | 0    | 0   | 15   | 74   | 28   |
| 0    | 0    | 0    | 0   | 13   | 52   | 0    |
| 85   | 34   | 0    | 0   | 176  | 235  | 26   |
| 0    | 19   | 0    | 0   | 59   | 128  | 0    |
| 25   | 0    | 0    | 0   | 14   | 27   | 0    |
| 0    | 0    | 0    | 0   | 82   | 34   | 0    |
| 0    | 0    | 0    | 0   | 0    | 12   | 0    |
| 40   | 510  | 21   | 0   | 1644 | 1964 | 357  |
| 2105 | 929  | 208  | 191 | 2218 | 3525 | 1007 |
| 116  | 0    | 0    | 11  | 13   | 24   | 0    |
| 0    | 10   | 0    | 0   | 54   | 48   | 0    |
| 0    | 47   | 0    | 0   | 202  | 179  | 46   |
| 0    | 23   | 0    | 0   | 194  | 272  | 28   |
| 0    | 0    | 0    | 0   | 103  | 81   | 18   |
| 0    | 10   | 0    | 0   | 228  | 105  | 115  |
| 0    | 10   | 0    | 0   | 84   | 12   | 36   |
| 0    | 33   | 0    | 0   | 167  | 78   | 10   |
| 10   | 234  | 0    | 0   | 1012 | 777  | 127  |
| 29   | 39   | 0    | 0   | 55   | 170  | 81   |
| 0    | 0    | 0    | 0   | 15   | 47   | 0    |
| 0    | 0    | 0    | 0   | 28   | 10   | 0    |
| 0    | 298  | 37   | 0   | 985  | 833  | 236  |
| 391  | 1076 | 227  | 80  | 3750 | 5193 | 787  |



|      |      |      |      |      |      |      |
|------|------|------|------|------|------|------|
| 0    | 0    | 0    | 0    | 62   | 75   | 11   |
| 245  | 40   | 0    | 37   | 110  | 131  | 308  |
| 14   | 47   | 0    | 0    | 279  | 1549 | 53   |
| 0    | 12   | 0    | 0    | 210  | 131  | 0    |
| 662  | 876  | 418  | 52   | 2452 | 6197 | 381  |
| 0    | 14   | 141  | 23   | 11   | 35   | 0    |
| 0    | 0    | 0    | 0    | 35   | 11   | 0    |
| 0    | 10   | 0    | 0    | 150  | 88   | 12   |
| 0    | 29   | 0    | 0    | 44   | 108  | 0    |
| 0    | 0    | 0    | 0    | 41   | 15   | 35   |
| 54   | 0    | 0    | 50   | 73   | 35   | 37   |
| 10   | 0    | 0    | 0    | 86   | 23   | 91   |
| 2798 | 1191 | 1296 | 1902 | 1645 | 2467 | 742  |
| 0    | 0    | 0    | 0    | 0    | 16   | 0    |
| 242  | 386  | 646  | 315  | 1058 | 1392 | 182  |
| 10   | 54   | 0    | 0    | 133  | 144  | 35   |
| 0    | 0    | 0    | 54   | 0    | 11   | 12   |
| 0    | 200  | 0    | 0    | 961  | 523  | 96   |
| 37   | 0    | 20   | 0    | 80   | 40   | 0    |
| 0    | 18   | 0    | 0    | 206  | 99   | 12   |
| 0    | 0    | 0    | 0    | 26   | 45   | 0    |
| 10   | 0    | 0    | 0    | 29   | 25   | 0    |
| 29   | 0    | 0    | 31   | 0    | 15   | 39   |
| 26   | 36   | 10   | 49   | 68   | 45   | 49   |
| 10   | 125  | 42   | 207  | 235  | 96   | 92   |
| 76   | 30   | 13   | 22   | 102  | 81   | 100  |
| 33   | 0    | 0    | 60   | 47   | 53   | 22   |
| 0    | 0    | 0    | 0    | 10   | 21   | 0    |
| 0    | 112  | 0    | 79   | 101  | 124  | 0    |
| 201  | 644  | 543  | 248  | 847  | 858  | 124  |
| 199  | 13   | 31   | 334  | 0    | 41   | 0    |
| 0    | 11   | 0    | 12   | 15   | 25   | 0    |
| 0    | 0    | 344  | 14   | 0    | 35   | 0    |
| 19   | 0    | 15   | 0    | 10   | 47   | 0    |
| 0    | 0    | 0    | 0    | 68   | 70   | 0    |
| 0    | 58   | 0    | 0    | 14   | 15   | 0    |
| 0    | 23   | 0    | 39   | 69   | 23   | 21   |
| 0    | 81   | 74   | 85   | 30   | 68   | 80   |
| 12   | 41   | 0    | 0    | 60   | 50   | 0    |
| 227  | 112  | 101  | 145  | 219  | 199  | 126  |
| 0    | 12   | 0    | 0    | 10   | 22   | 0    |
| 28   | 16   | 10   | 11   | 10   | 23   | 0    |
| 63   | 80   | 27   | 0    | 215  | 444  | 178  |
| 1520 | 924  | 581  | 620  | 1157 | 1916 | 1063 |
| 0    | 10   | 10   | 0    | 47   | 32   | 46   |
| 22   | 879  | 20   | 28   | 270  | 67   | 1006 |

|     |      |      |      |      |      |      |
|-----|------|------|------|------|------|------|
| 0   | 0    | 0    | 99   | 0    | 12   | 0    |
| 255 | 0    | 0    | 115  | 10   | 47   | 0    |
| 272 | 0    | 0    | 125  | 22   | 30   | 81   |
| 535 | 1155 | 453  | 65   | 1616 | 1234 | 1470 |
| 0   | 10   | 0    | 0    | 130  | 55   | 86   |
| 132 | 85   | 73   | 0    | 50   | 107  | 408  |
| 0   | 0    | 27   | 15   | 0    | 20   | 0    |
| 0   | 0    | 114  | 0    | 51   | 61   | 312  |
| 0   | 24   | 0    | 0    | 58   | 40   | 0    |
| 0   | 0    | 0    | 0    | 0    | 11   | 0    |
| 43  | 47   | 196  | 13   | 167  | 94   | 140  |
| 13  | 14   | 12   | 1544 | 22   | 64   | 32   |
| 0   | 53   | 0    | 0    | 47   | 82   | 75   |
| 15  | 0    | 0    | 0    | 0    | 11   | 0    |
| 32  | 10   | 0    | 76   | 22   | 49   | 21   |
| 0   | 0    | 0    | 0    | 131  | 123  | 22   |
| 20  | 35   | 0    | 34   | 73   | 136  | 0    |
| 0   | 0    | 0    | 0    | 28   | 41   | 0    |
| 0   | 0    | 0    | 0    | 0    | 10   | 0    |
| 0   | 0    | 104  | 0    | 56   | 102  | 57   |
| 0   | 76   | 38   | 251  | 111  | 94   | 49   |
| 0   | 0    | 0    | 12   | 0    | 10   | 40   |
| 151 | 134  | 78   | 65   | 264  | 173  | 12   |
| 43  | 0    | 0    | 0    | 0    | 10   | 0    |
| 24  | 72   | 0    | 26   | 101  | 49   | 0    |
| 140 | 163  | 0    | 284  | 677  | 959  | 13   |
| 81  | 10   | 17   | 11   | 21   | 11   | 67   |
| 122 | 92   | 22   | 384  | 154  | 168  | 92   |
| 48  | 16   | 28   | 0    | 45   | 29   | 0    |
| 12  | 36   | 0    | 67   | 42   | 107  | 0    |
| 31  | 0    | 0    | 0    | 0    | 10   | 22   |
| 10  | 24   | 0    | 85   | 95   | 122  | 0    |
| 173 | 79   | 25   | 115  | 229  | 238  | 99   |
| 15  | 0    | 26   | 26   | 0    | 12   | 10   |
| 22  | 0    | 13   | 56   | 37   | 13   | 107  |
| 0   | 118  | 0    | 142  | 828  | 1221 | 197  |
| 14  | 92   | 13   | 0    | 364  | 359  | 133  |
| 0   | 0    | 0    | 0    | 67   | 74   | 0    |
| 0   | 0    | 0    | 0    | 141  | 223  | 0    |
| 0   | 21   | 0    | 0    | 0    | 28   | 0    |
| 0   | 42   | 4192 | 294  | 38   | 58   | 1349 |
| 0   | 0    | 0    | 0    | 52   | 37   | 12   |
| 0   | 50   | 0    | 0    | 345  | 221  | 46   |
| 0   | 0    | 0    | 0    | 33   | 36   | 0    |
| 151 | 184  | 126  | 177  | 753  | 331  | 258  |
| 195 | 287  | 161  | 368  | 1100 | 12   | 0    |

|      |      |      |      |      |      |      |
|------|------|------|------|------|------|------|
| 44   | 502  | 64   | 143  | 2354 | 15   | 18   |
| 665  | 85   | 740  | 0    | 232  | 60   | 171  |
| 3499 | 1080 | 1519 | 384  | 7542 | 91   | 459  |
| 7374 | 92   | 272  | 1491 | 262  | 15   | 812  |
| 37   | 0    | 0    | 0    | 35   | 64   | 0    |
| 58   | 46   | 53   | 197  | 288  | 205  | 76   |
| 132  | 71   | 228  | 187  | 641  | 348  | 38   |
| 0    | 0    | 0    | 21   | 75   | 20   | 0    |
| 0    | 0    | 0    | 0    | 47   | 32   | 0    |
| 0    | 0    | 0    | 0    | 63   | 33   | 0    |
| 12   | 0    | 0    | 0    | 60   | 89   | 0    |
| 0    | 0    | 0    | 0    | 50   | 28   | 0    |
| 0    | 0    | 0    | 11   | 130  | 160  | 0    |
| 344  | 26   | 96   | 519  | 161  | 349  | 251  |
| 39   | 0    | 0    | 0    | 0    | 42   | 0    |
| 62   | 484  | 94   | 0    | 974  | 2799 | 49   |
| 35   | 0    | 0    | 0    | 10   | 33   | 0    |
| 0    | 0    | 0    | 0    | 0    | 11   | 0    |
| 0    | 0    | 0    | 0    | 0    | 11   | 0    |
| 0    | 0    | 0    | 0    | 37   | 37   | 0    |
| 0    | 0    | 0    | 0    | 72   | 119  | 0    |
| 54   | 29   | 14   | 959  | 176  | 11   | 91   |
| 0    | 555  | 0    | 0    | 252  | 136  | 0    |
| 0    | 0    | 0    | 0    | 10   | 24   | 0    |
| 0    | 65   | 0    | 0    | 283  | 239  | 0    |
| 0    | 36   | 0    | 47   | 51   | 107  | 0    |
| 0    | 45   | 0    | 23   | 452  | 368  | 94   |
| 0    | 0    | 0    | 0    | 50   | 110  | 0    |
| 0    | 0    | 0    | 0    | 141  | 271  | 12   |
| 0    | 0    | 0    | 0    | 0    | 12   | 0    |
| 0    | 0    | 0    | 0    | 10   | 115  | 0    |
| 0    | 67   | 0    | 0    | 361  | 1318 | 39   |
| 0    | 0    | 0    | 0    | 194  | 77   | 0    |
| 0    | 0    | 0    | 0    | 26   | 27   | 0    |
| 0    | 0    | 0    | 0    | 0    | 47   | 0    |
| 0    | 0    | 13   | 10   | 0    | 31   | 90   |
| 445  | 1341 | 795  | 2420 | 1165 | 4042 | 2795 |
| 57   | 984  | 438  | 619  | 1130 | 2552 | 3158 |
| 0    | 21   | 0    | 95   | 70   | 417  | 87   |
| 0    | 0    | 0    | 0    | 12   | 119  | 0    |
| 0    | 0    | 0    | 0    | 0    | 12   | 0    |
| 69   | 1390 | 84   | 67   | 4474 | 5892 | 304  |
| 0    | 125  | 63   | 42   | 704  | 263  | 145  |
| 0    | 0    | 27   | 0    | 40   | 62   | 42   |
| 0    | 62   | 0    | 0    | 281  | 230  | 38   |
| 109  | 419  | 65   | 31   | 1412 | 3522 | 185  |

|     |      |     |     |      |      |      |
|-----|------|-----|-----|------|------|------|
| 38  | 158  | 91  | 0   | 642  | 1227 | 116  |
| 64  | 1087 | 118 | 0   | 3615 | 3856 | 149  |
| 0   | 0    | 0   | 167 | 23   | 66   | 77   |
| 0   | 0    | 0   | 175 | 0    | 14   | 0    |
| 0   | 55   | 51  | 41  | 56   | 58   | 90   |
| 0   | 673  | 325 | 287 | 371  | 934  | 1351 |
| 12  | 26   | 30  | 29  | 376  | 1240 | 111  |
| 0   | 15   | 47  | 0   | 0    | 32   | 143  |
| 27  | 0    | 0   | 15  | 0    | 73   | 157  |
| 0   | 0    | 0   | 0   | 0    | 12   | 0    |
| 0   | 0    | 0   | 0   | 113  | 458  | 78   |
| 0   | 0    | 0   | 0   | 0    | 39   | 90   |
| 0   | 0    | 0   | 0   | 43   | 80   | 0    |
| 0   | 184  | 75  | 173 | 28   | 125  | 167  |
| 127 | 0    | 0   | 50  | 0    | 90   | 266  |
| 0   | 0    | 0   | 0   | 0    | 169  | 0    |
| 0   | 0    | 0   | 0   | 73   | 157  | 0    |
| 0   | 54   | 0   | 0   | 247  | 438  | 13   |
| 0   | 227  | 74  | 93  | 52   | 71   | 305  |
| 0   | 0    | 0   | 0   | 0    | 107  | 0    |
| 0   | 0    | 0   | 144 | 0    | 44   | 0    |
| 0   | 10   | 0   | 156 | 0    | 85   | 11   |
| 0   | 82   | 22  | 66  | 35   | 15   | 489  |
| 0   | 0    | 0   | 47  | 23   | 117  | 0    |
| 25  | 169  | 222 | 950 | 103  | 327  | 998  |
| 0   | 106  | 29  | 40  | 449  | 308  | 73   |
| 0   | 20   | 17  | 0   | 61   | 43   | 0    |
| 58  | 573  | 97  | 33  | 2086 | 4282 | 63   |
| 0   | 144  | 81  | 98  | 118  | 60   | 146  |
| 0   | 81   | 16  | 44  | 105  | 10   | 73   |
| 0   | 164  | 0   | 0   | 562  | 618  | 32   |
| 10  | 16   | 47  | 15  | 49   | 34   | 0    |
| 0   | 0    | 0   | 0   | 29   | 58   | 0    |
| 0   | 0    | 10  | 42  | 0    | 38   | 39   |
| 0   | 286  | 153 | 43  | 206  | 377  | 486  |
| 0   | 84   | 0   | 0   | 50   | 57   | 140  |
| 0   | 133  | 55  | 0   | 109  | 128  | 65   |
| 0   | 0    | 0   | 0   | 0    | 11   | 30   |
| 0   | 0    | 0   | 0   | 39   | 31   | 0    |
| 15  | 21   | 90  | 115 | 81   | 716  | 29   |
| 10  | 206  | 129 | 303 | 879  | 1583 | 83   |
| 11  | 261  | 0   | 108 | 530  | 351  | 43   |
| 0   | 51   | 48  | 36  | 51   | 40   | 0    |
| 110 | 432  | 817 | 462 | 2161 | 377  | 50   |
| 0   | 0    | 0   | 0   | 0    | 42   | 134  |
| 303 | 130  | 69  | 118 | 859  | 520  | 549  |

|      |      |      |      |      |     |      |
|------|------|------|------|------|-----|------|
| 1149 | 252  | 389  | 502  | 374  | 386 | 2354 |
| 39   | 11   | 0    | 70   | 0    | 31  | 11   |
| 0    | 0    | 0    | 155  | 26   | 43  | 82   |
| 156  | 62   | 0    | 94   | 24   | 59  | 187  |
| 2896 | 22   | 438  | 48   | 89   | 53  | 92   |
| 0    | 32   | 11   | 0    | 17   | 25  | 264  |
| 0    | 14   | 34   | 36   | 30   | 38  | 471  |
| 145  | 11   | 0    | 87   | 10   | 57  | 11   |
| 27   | 0    | 0    | 0    | 0    | 31  | 47   |
| 0    | 0    | 0    | 0    | 0    | 10  | 0    |
| 0    | 0    | 0    | 0    | 0    | 36  | 0    |
| 143  | 0    | 0    | 11   | 11   | 40  | 265  |
| 408  | 411  | 751  | 357  | 450  | 217 | 3198 |
| 0    | 0    | 51   | 11   | 0    | 23  | 808  |
| 25   | 49   | 0    | 136  | 0    | 10  | 287  |
| 32   | 60   | 11   | 163  | 0    | 32  | 311  |
| 306  | 280  | 153  | 636  | 55   | 106 | 1256 |
| 28   | 10   | 0    | 25   | 27   | 11  | 265  |
| 60   | 10   | 0    | 0    | 26   | 15  | 109  |
| 80   | 14   | 0    | 0    | 71   | 35  | 385  |
| 12   | 12   | 0    | 0    | 0    | 12  | 92   |
| 0    | 12   | 0    | 0    | 23   | 10  | 30   |
| 49   | 35   | 63   | 27   | 55   | 86  | 47   |
| 0    | 10   | 0    | 43   | 29   | 48  | 13   |
| 0    | 0    | 12   | 0    | 10   | 23  | 26   |
| 0    | 63   | 0    | 0    | 33   | 10  | 55   |
| 802  | 760  | 2897 | 1417 | 2560 | 642 | 1424 |
| 115  | 10   | 10   | 106  | 85   | 58  | 167  |
| 14   | 52   | 0    | 29   | 76   | 30  | 65   |
| 76   | 43   | 10   | 14   | 71   | 12  | 10   |
| 315  | 2072 | 230  | 596  | 1408 | 369 | 1550 |
| 197  | 274  | 28   | 121  | 165  | 46  | 87   |
| 10   | 0    | 0    | 35   | 35   | 23  | 40   |
| 64   | 0    | 500  | 0    | 7246 | 10  | 351  |
| 136  | 266  | 33   | 124  | 173  | 55  | 58   |
| 0    | 26   | 11   | 44   | 54   | 75  | 74   |
| 38   | 0    | 0    | 11   | 10   | 39  | 0    |
| 152  | 330  | 89   | 86   | 223  | 57  | 421  |
| 23   | 45   | 23   | 60   | 149  | 64  | 120  |
| 46   | 53   | 48   | 241  | 171  | 108 | 44   |
| 250  | 63   | 14   | 124  | 12   | 148 | 54   |
| 535  | 28   | 0    | 69   | 11   | 255 | 77   |
| 31   | 0    | 0    | 0    | 0    | 22  | 53   |
| 40   | 64   | 49   | 118  | 128  | 34  | 2073 |
| 41   | 96   | 1501 | 93   | 388  | 104 | 239  |
| 10   | 0    | 0    | 0    | 98   | 39  | 45   |

|     |     |      |     |      |      |     |
|-----|-----|------|-----|------|------|-----|
| 51  | 230 | 102  | 340 | 1136 | 663  | 107 |
| 134 | 14  | 51   | 21  | 158  | 84   | 59  |
| 31  | 18  | 0    | 56  | 0    | 48   | 73  |
| 87  | 0   | 125  | 10  | 136  | 62   | 82  |
| 0   | 0   | 0    | 0   | 59   | 43   | 0   |
| 0   | 0   | 0    | 0   | 52   | 50   | 0   |
| 31  | 84  | 0    | 31  | 45   | 12   | 0   |
| 14  | 0   | 0    | 0   | 0    | 24   | 11  |
| 13  | 0   | 0    | 0   | 0    | 11   | 0   |
| 0   | 0   | 0    | 0   | 51   | 13   | 0   |
| 0   | 0   | 0    | 0   | 0    | 12   | 0   |
| 79  | 43  | 18   | 230 | 242  | 348  | 35  |
| 0   | 0   | 0    | 0   | 0    | 29   | 0   |
| 0   | 0   | 31   | 11  | 0    | 41   | 0   |
| 0   | 0   | 0    | 10  | 86   | 43   | 12  |
| 0   | 13  | 0    | 0   | 80   | 61   | 0   |
| 0   | 0   | 0    | 0   | 0    | 10   | 0   |
| 0   | 0   | 0    | 15  | 110  | 884  | 0   |
| 192 | 364 | 1031 | 220 | 1333 | 2355 | 856 |
| 0   | 0   | 0    | 0   | 36   | 622  | 0   |
| 0   | 0   | 0    | 0   | 10   | 55   | 0   |
| 0   | 0   | 0    | 0   | 53   | 681  | 0   |
| 0   | 0   | 0    | 0   | 17   | 23   | 0   |
| 70  | 220 | 64   | 98  | 1813 | 1892 | 878 |
| 0   | 0   | 0    | 0   | 0    | 12   | 0   |
| 0   | 0   | 0    | 0   | 133  | 210  | 0   |
| 13  | 0   | 0    | 30  | 93   | 51   | 454 |
| 0   | 0   | 0    | 18  | 68   | 13   | 307 |
| 0   | 0   | 0    | 0   | 64   | 39   | 0   |
| 0   | 0   | 0    | 0   | 88   | 149  | 15  |
| 0   | 0   | 0    | 0   | 27   | 48   | 0   |
| 0   | 0   | 0    | 0   | 47   | 75   | 0   |
| 0   | 0   | 0    | 0   | 0    | 23   | 0   |
| 0   | 0   | 0    | 0   | 52   | 130  | 0   |
| 0   | 0   | 0    | 0   | 212  | 399  | 446 |
| 0   | 0   | 0    | 0   | 87   | 37   | 0   |
| 0   | 0   | 0    | 0   | 10   | 32   | 0   |
| 0   | 0   | 0    | 0   | 0    | 10   | 0   |
| 0   | 12  | 0    | 24  | 20   | 68   | 0   |
| 34  | 10  | 0    | 13  | 35   | 35   | 0   |
| 0   | 11  | 0    | 0   | 78   | 21   | 0   |
| 0   | 22  | 0    | 0   | 246  | 10   | 0   |
| 59  | 13  | 0    | 14  | 26   | 41   | 0   |
| 129 | 29  | 0    | 12  | 146  | 51   | 14  |
| 0   | 0   | 0    | 0   | 28   | 23   | 0   |
| 0   | 0   | 0    | 0   | 0    | 10   | 0   |

|     |     |     |     |      |      |     |
|-----|-----|-----|-----|------|------|-----|
| 0   | 20  | 0   | 105 | 237  | 142  | 31  |
| 0   | 0   | 0   | 0   | 39   | 24   | 0   |
| 0   | 0   | 12  | 56  | 0    | 12   | 0   |
| 241 | 443 | 744 | 645 | 723  | 623  | 238 |
| 0   | 0   | 0   | 47  | 208  | 436  | 0   |
| 10  | 11  | 0   | 0   | 123  | 504  | 0   |
| 0   | 15  | 0   | 61  | 238  | 141  | 0   |
| 0   | 34  | 0   | 31  | 257  | 328  | 24  |
| 0   | 0   | 0   | 57  | 14   | 13   | 0   |
| 0   | 14  | 0   | 71  | 97   | 14   | 115 |
| 0   | 22  | 72  | 370 | 24   | 198  | 50  |
| 86  | 110 | 177 | 611 | 557  | 1114 | 70  |
| 0   | 201 | 10  | 321 | 1596 | 1954 | 20  |
| 219 | 303 | 351 | 222 | 1113 | 2086 | 109 |
| 0   | 23  | 0   | 26  | 199  | 262  | 14  |
| 0   | 0   | 0   | 0   | 0    | 21   | 0   |
| 0   | 35  | 0   | 0   | 0    | 23   | 0   |
| 0   | 33  | 0   | 17  | 108  | 192  | 0   |
| 0   | 0   | 0   | 0   | 0    | 10   | 0   |
| 0   | 0   | 0   | 11  | 37   | 30   | 0   |
| 0   | 26  | 44  | 10  | 185  | 250  | 20  |
| 0   | 0   | 0   | 0   | 0    | 35   | 0   |
| 0   | 64  | 0   | 191 | 266  | 470  | 44  |
| 0   | 341 | 126 | 116 | 2058 | 2546 | 102 |
| 0   | 17  | 0   | 0   | 34   | 32   | 0   |
| 0   | 12  | 0   | 0   | 76   | 32   | 0   |
| 0   | 0   | 0   | 278 | 32   | 60   | 24  |
| 0   | 0   | 0   | 0   | 0    | 11   | 0   |
| 312 | 515 | 272 | 145 | 3947 | 463  | 124 |
| 0   | 19  | 0   | 0   | 358  | 14   | 0   |
| 0   | 0   | 0   | 0   | 174  | 10   | 10  |
| 0   | 77  | 0   | 0   | 533  | 54   | 0   |
| 0   | 29  | 0   | 0   | 440  | 56   | 0   |
| 0   | 12  | 0   | 0   | 29   | 107  | 0   |
| 0   | 0   | 0   | 0   | 11   | 21   | 0   |
| 0   | 0   | 0   | 0   | 0    | 15   | 0   |
| 0   | 33  | 15  | 54  | 0    | 12   | 0   |
| 44  | 211 | 16  | 956 | 436  | 582  | 129 |
| 0   | 0   | 0   | 0   | 0    | 16   | 0   |
| 0   | 35  | 0   | 212 | 103  | 49   | 0   |
| 0   | 0   | 0   | 280 | 43   | 10   | 43  |
| 0   | 0   | 0   | 0   | 62   | 44   | 0   |
| 0   | 0   | 0   | 0   | 50   | 76   | 0   |
| 0   | 10  | 0   | 0   | 10   | 40   | 0   |
| 0   | 0   | 0   | 0   | 0    | 11   | 0   |
| 0   | 0   | 0   | 0   | 70   | 15   | 0   |

|      |      |     |      |       |       |      |
|------|------|-----|------|-------|-------|------|
| 0    | 13   | 0   | 85   | 71    | 10    | 57   |
| 0    | 0    | 0   | 156  | 0     | 30    | 0    |
| 0    | 0    | 0   | 0    | 0     | 12    | 0    |
| 0    | 0    | 0   | 0    | 21    | 12    | 0    |
| 0    | 0    | 0   | 0    | 50    | 43    | 0    |
| 0    | 40   | 0   | 0    | 126   | 225   | 0    |
| 0    | 0    | 0   | 51   | 53    | 26    | 0    |
| 0    | 130  | 0   | 127  | 23    | 26    | 43   |
| 312  | 539  | 468 | 1393 | 2484  | 2631  | 597  |
| 41   | 21   | 40  | 74   | 38    | 44    | 0    |
| 0    | 12   | 0   | 74   | 44    | 12    | 94   |
| 1790 | 397  | 257 | 229  | 1124  | 259   | 153  |
| 0    | 0    | 0   | 0    | 29    | 43    | 0    |
| 0    | 0    | 0   | 45   | 0     | 10    | 0    |
| 400  | 18   | 0   | 34   | 100   | 11    | 0    |
| 21   | 520  | 228 | 660  | 1120  | 430   | 463  |
| 0    | 33   | 13  | 18   | 234   | 50    | 13   |
| 0    | 0    | 0   | 0    | 0     | 66    | 0    |
| 0    | 0    | 0   | 0    | 70    | 63    | 0    |
| 12   | 10   | 0   | 30   | 41    | 33    | 0    |
| 0    | 0    | 0   | 11   | 0     | 41    | 0    |
| 0    | 0    | 14  | 0    | 0     | 12    | 0    |
| 0    | 11   | 0   | 23   | 48    | 34    | 0    |
| 31   | 38   | 138 | 77   | 63    | 286   | 28   |
| 39   | 649  | 246 | 162  | 2901  | 2564  | 275  |
| 126  | 470  | 383 | 302  | 1103  | 1750  | 812  |
| 19   | 79   | 18  | 18   | 64    | 130   | 51   |
| 0    | 23   | 10  | 27   | 45    | 20    | 186  |
| 0    | 70   | 68  | 58   | 145   | 62    | 238  |
| 0    | 0    | 0   | 0    | 0     | 11    | 11   |
| 0    | 0    | 0   | 0    | 0     | 34    | 0    |
| 0    | 0    | 0   | 0    | 41    | 189   | 0    |
| 0    | 27   | 0   | 0    | 12    | 37    | 35   |
| 0    | 10   | 38  | 0    | 0     | 12    | 34   |
| 0    | 71   | 88  | 64   | 117   | 93    | 126  |
| 0    | 0    | 0   | 216  | 0     | 13    | 0    |
| 0    | 561  | 0   | 24   | 2744  | 2119  | 92   |
| 1028 | 5397 | 968 | 378  | 16789 | 23985 | 1937 |
| 0    | 232  | 13  | 55   | 649   | 686   | 30   |
| 0    | 13   | 0   | 0    | 134   | 35    | 0    |
| 26   | 1068 | 111 | 0    | 4402  | 7851  | 401  |
| 0    | 0    | 0   | 0    | 29    | 58    | 0    |
| 0    | 36   | 0   | 0    | 144   | 280   | 0    |
| 0    | 128  | 0   | 0    | 721   | 484   | 0    |
| 0    | 0    | 0   | 0    | 44    | 27    | 0    |
| 15   | 240  | 10  | 14   | 1452  | 1526  | 57   |



|      |      |      |      |       |       |      |
|------|------|------|------|-------|-------|------|
| 0    | 135  | 0    | 0    | 637   | 770   | 41   |
| 0    | 103  | 0    | 0    | 436   | 396   | 0    |
| 0    | 0    | 0    | 0    | 52    | 10    | 0    |
| 46   | 1003 | 41   | 0    | 4265  | 3051  | 294  |
| 0    | 0    | 13   | 0    | 0     | 53    | 0    |
| 0    | 0    | 0    | 24   | 87    | 50    | 147  |
| 11   | 61   | 31   | 52   | 60    | 117   | 100  |
| 0    | 0    | 0    | 11   | 71    | 50    | 61   |
| 26   | 12   | 38   | 35   | 106   | 33    | 25   |
| 0    | 0    | 0    | 0    | 27    | 56    | 11   |
| 40   | 419  | 78   | 116  | 573   | 514   | 476  |
| 0    | 169  | 0    | 0    | 657   | 913   | 0    |
| 0    | 0    | 0    | 0    | 121   | 160   | 48   |
| 67   | 15   | 0    | 0    | 72    | 95    | 0    |
| 13   | 86   | 0    | 45   | 15    | 126   | 12   |
| 0    | 0    | 0    | 0    | 0     | 78    | 0    |
| 0    | 0    | 0    | 0    | 0     | 20    | 0    |
| 0    | 0    | 0    | 0    | 10    | 12    | 0    |
| 39   | 11   | 82   | 68   | 207   | 107   | 84   |
| 0    | 0    | 0    | 0    | 82    | 170   | 18   |
| 0    | 119  | 0    | 140  | 643   | 643   | 0    |
| 0    | 0    | 0    | 0    | 0     | 12    | 0    |
| 0    | 289  | 0    | 43   | 1035  | 1317  | 114  |
| 0    | 397  | 0    | 17   | 2706  | 3190  | 50   |
| 12   | 492  | 33   | 10   | 2184  | 3315  | 225  |
| 0    | 109  | 0    | 0    | 611   | 336   | 0    |
| 0    | 0    | 0    | 0    | 22    | 35    | 53   |
| 0    | 91   | 0    | 0    | 421   | 1352  | 79   |
| 0    | 41   | 0    | 0    | 533   | 497   | 10   |
| 0    | 15   | 0    | 0    | 240   | 221   | 0    |
| 0    | 70   | 0    | 0    | 555   | 929   | 0    |
| 0    | 27   | 0    | 0    | 107   | 111   | 0    |
| 0    | 44   | 0    | 0    | 358   | 314   | 0    |
| 0    | 11   | 0    | 13   | 15    | 21    | 25   |
| 0    | 0    | 0    | 0    | 38    | 10    | 0    |
| 0    | 0    | 0    | 0    | 133   | 85    | 0    |
| 13   | 134  | 13   | 0    | 512   | 1197  | 0    |
| 0    | 197  | 11   | 56   | 376   | 527   | 80   |
| 3294 | 3278 | 2358 | 2039 | 11044 | 16337 | 2401 |
| 0    | 208  | 0    | 0    | 1247  | 955   | 15   |
| 0    | 0    | 0    | 0    | 0     | 49    | 0    |
| 0    | 10   | 0    | 0    | 202   | 116   | 0    |
| 11   | 0    | 40   | 93   | 353   | 371   | 109  |
| 0    | 0    | 0    | 0    | 113   | 50    | 0    |
| 0    | 35   | 0    | 0    | 112   | 242   | 0    |
| 0    | 0    | 0    | 0    | 0     | 75    | 0    |

|     |      |     |      |      |      |      |
|-----|------|-----|------|------|------|------|
| 0   | 0    | 0   | 0    | 41   | 121  | 0    |
| 0   | 122  | 15  | 48   | 411  | 345  | 98   |
| 0   | 27   | 0   | 0    | 200  | 181  | 10   |
| 0   | 0    | 0   | 0    | 38   | 51   | 0    |
| 0   | 0    | 0   | 0    | 45   | 149  | 0    |
| 25  | 0    | 0   | 66   | 123  | 209  | 0    |
| 0   | 10   | 0   | 0    | 83   | 145  | 0    |
| 0   | 0    | 0   | 0    | 18   | 32   | 0    |
| 0   | 0    | 0   | 0    | 0    | 10   | 0    |
| 0   | 0    | 0   | 0    | 26   | 62   | 0    |
| 0   | 0    | 0   | 12   | 79   | 105  | 0    |
| 12  | 111  | 0   | 0    | 652  | 668  | 34   |
| 329 | 2092 | 676 | 1427 | 7141 | 2215 | 2270 |
| 112 | 198  | 132 | 247  | 595  | 221  | 169  |
| 0   | 375  | 10  | 0    | 1827 | 1858 | 65   |
| 0   | 0    | 0   | 0    | 34   | 148  | 0    |
| 0   | 0    | 0   | 0    | 84   | 62   | 0    |
| 10  | 60   | 0   | 0    | 58   | 24   | 39   |
| 0   | 70   | 10  | 0    | 379  | 14   | 27   |
| 208 | 176  | 194 | 271  | 971  | 406  | 376  |
| 31  | 203  | 63  | 123  | 749  | 284  | 214  |
| 86  | 118  | 97  | 39   | 255  | 252  | 49   |
| 53  | 45   | 13  | 47   | 367  | 516  | 24   |
| 0   | 0    | 0   | 0    | 60   | 43   | 0    |
| 0   | 0    | 0   | 0    | 42   | 10   | 31   |
| 0   | 0    | 0   | 0    | 43   | 68   | 0    |
| 0   | 40   | 0   | 0    | 273  | 336  | 0    |
| 29  | 299  | 29  | 49   | 715  | 296  | 252  |
| 0   | 0    | 0   | 0    | 26   | 133  | 11   |
| 0   | 0    | 0   | 25   | 154  | 105  | 28   |
| 0   | 43   | 0   | 0    | 182  | 377  | 0    |
| 0   | 0    | 0   | 13   | 0    | 22   | 0    |
| 289 | 112  | 141 | 811  | 53   | 186  | 92   |
| 0   | 0    | 15  | 135  | 0    | 10   | 0    |
| 0   | 0    | 16  | 109  | 0    | 13   | 13   |
| 0   | 0    | 0   | 0    | 131  | 28   | 10   |
| 13  | 37   | 13  | 338  | 0    | 69   | 78   |
| 0   | 25   | 0   | 78   | 20   | 15   | 73   |
| 90  | 11   | 0   | 250  | 25   | 218  | 95   |
| 38  | 63   | 42  | 510  | 78   | 142  | 127  |
| 10  | 0    | 0   | 129  | 0    | 12   | 15   |
| 85  | 45   | 45  | 225  | 127  | 113  | 0    |
| 0   | 22   | 0   | 41   | 170  | 98   | 0    |
| 64  | 590  | 200 | 273  | 1610 | 1014 | 1474 |
| 14  | 0    | 0   | 0    | 175  | 63   | 33   |
| 21  | 0    | 0   | 0    | 82   | 74   | 0    |

|     |     |      |      |      |      |     |
|-----|-----|------|------|------|------|-----|
| 0   | 10  | 0    | 0    | 31   | 35   | 0   |
| 0   | 0   | 0    | 0    | 67   | 92   | 13  |
| 0   | 0   | 0    | 0    | 32   | 28   | 0   |
| 0   | 77  | 53   | 13   | 156  | 150  | 98  |
| 27  | 93  | 70   | 185  | 36   | 55   | 308 |
| 0   | 321 | 64   | 80   | 64   | 10   | 718 |
| 0   | 73  | 80   | 126  | 52   | 18   | 569 |
| 0   | 0   | 0    | 22   | 0    | 28   | 31  |
| 33  | 52  | 158  | 30   | 12   | 22   | 202 |
| 19  | 0   | 0    | 0    | 67   | 186  | 12  |
| 0   | 0   | 0    | 0    | 81   | 53   | 22  |
| 0   | 28  | 0    | 0    | 267  | 190  | 0   |
| 0   | 36  | 0    | 0    | 69   | 74   | 0   |
| 0   | 0   | 0    | 0    | 0    | 29   | 0   |
| 0   | 0   | 0    | 0    | 78   | 40   | 0   |
| 0   | 0   | 0    | 0    | 36   | 48   | 0   |
| 0   | 0   | 0    | 0    | 0    | 18   | 0   |
| 0   | 79  | 0    | 0    | 345  | 274  | 0   |
| 0   | 10  | 0    | 0    | 31   | 29   | 0   |
| 0   | 0   | 0    | 0    | 0    | 24   | 13  |
| 41  | 166 | 78   | 0    | 599  | 17   | 63  |
| 0   | 0   | 0    | 0    | 0    | 10   | 0   |
| 64  | 485 | 1216 | 76   | 5633 | 393  | 731 |
| 0   | 0   | 0    | 0    | 25   | 11   | 0   |
| 116 | 211 | 670  | 153  | 5523 | 444  | 536 |
| 0   | 0   | 0    | 0    | 0    | 73   | 12  |
| 0   | 92  | 187  | 0    | 270  | 45   | 57  |
| 47  | 121 | 572  | 35   | 1536 | 110  | 140 |
| 16  | 16  | 30   | 0    | 18   | 32   | 23  |
| 0   | 53  | 0    | 0    | 35   | 34   | 0   |
| 0   | 0   | 0    | 0    | 0    | 25   | 0   |
| 151 | 0   | 0    | 0    | 12   | 33   | 13  |
| 32  | 0   | 43   | 0    | 0    | 13   | 45  |
| 0   | 20  | 0    | 0    | 89   | 48   | 0   |
| 0   | 0   | 0    | 24   | 0    | 87   | 23  |
| 0   | 0   | 0    | 0    | 0    | 42   | 0   |
| 0   | 0   | 0    | 15   | 158  | 111  | 0   |
| 0   | 0   | 0    | 11   | 26   | 94   | 0   |
| 0   | 0   | 0    | 10   | 108  | 342  | 0   |
| 0   | 0   | 0    | 0    | 167  | 14   | 21  |
| 0   | 10  | 0    | 185  | 125  | 17   | 0   |
| 59  | 0   | 0    | 0    | 10   | 24   | 0   |
| 0   | 265 | 0    | 4911 | 389  | 1112 | 123 |
| 0   | 35  | 0    | 164  | 0    | 476  | 13  |
| 17  | 0   | 0    | 333  | 0    | 90   | 10  |
| 0   | 0   | 0    | 0    | 0    | 47   | 0   |

|      |      |      |      |      |      |       |
|------|------|------|------|------|------|-------|
| 0    | 0    | 0    | 0    | 0    | 14   | 0     |
| 0    | 54   | 37   | 195  | 146  | 154  | 194   |
| 0    | 41   | 0    | 155  | 0    | 11   | 132   |
| 0    | 0    | 0    | 32   | 0    | 68   | 37    |
| 0    | 42   | 0    | 43   | 10   | 24   | 0     |
| 0    | 130  | 0    | 30   | 58   | 29   | 11    |
| 0    | 40   | 27   | 0    | 60   | 46   | 31    |
| 0    | 0    | 0    | 213  | 28   | 95   | 0     |
| 993  | 1361 | 453  | 850  | 2400 | 812  | 4435  |
| 537  | 700  | 156  | 773  | 3531 | 252  | 495   |
| 317  | 369  | 48   | 305  | 1489 | 124  | 169   |
| 0    | 0    | 0    | 140  | 71   | 15   | 0     |
| 0    | 0    | 0    | 0    | 0    | 28   | 0     |
| 0    | 0    | 0    | 146  | 59   | 29   | 22    |
| 0    | 0    | 0    | 0    | 10   | 13   | 0     |
| 0    | 0    | 0    | 63   | 11   | 39   | 0     |
| 0    | 0    | 0    | 0    | 0    | 43   | 0     |
| 0    | 0    | 0    | 0    | 0    | 78   | 13    |
| 0    | 0    | 0    | 0    | 10   | 10   | 0     |
| 0    | 0    | 0    | 0    | 0    | 10   | 0     |
| 0    | 62   | 11   | 68   | 176  | 218  | 87    |
| 15   | 24   | 0    | 153  | 72   | 264  | 15    |
| 0    | 0    | 0    | 15   | 60   | 150  | 10    |
| 0    | 0    | 11   | 0    | 0    | 78   | 0     |
| 0    | 0    | 0    | 0    | 0    | 11   | 0     |
| 10   | 214  | 34   | 57   | 1516 | 640  | 378   |
| 302  | 1484 | 1110 | 531  | 4799 | 4002 | 4778  |
| 201  | 163  | 447  | 573  | 280  | 153  | 3463  |
| 1421 | 8911 | 4547 | 2287 | 4287 | 2930 | 19919 |
| 0    | 124  | 59   | 77   | 98   | 12   | 618   |
| 0    | 2337 | 74   | 34   | 149  | 14   | 812   |
| 0    | 0    | 15   | 87   | 90   | 10   | 198   |
| 280  | 1367 | 2912 | 830  | 2202 | 604  | 5442  |
| 163  | 955  | 452  | 188  | 561  | 229  | 2969  |
| 0    | 15   | 68   | 48   | 35   | 29   | 716   |
| 0    | 0    | 0    | 0    | 93   | 14   | 45    |
| 40   | 523  | 31   | 4296 | 613  | 1460 | 842   |
| 20   | 182  | 29   | 687  | 352  | 218  | 524   |
| 0    | 66   | 0    | 986  | 373  | 557  | 400   |
| 44   | 373  | 158  | 274  | 697  | 7618 | 446   |
| 0    | 0    | 18   | 0    | 22   | 842  | 0     |
| 0    | 0    | 0    | 0    | 11   | 245  | 0     |
| 44   | 266  | 44   | 1013 | 400  | 4185 | 457   |
| 0    | 136  | 0    | 230  | 13   | 54   | 44    |
| 0    | 0    | 77   | 0    | 38   | 624  | 0     |
| 0    | 175  | 0    | 3725 | 141  | 496  | 441   |

|      |      |     |      |      |      |      |
|------|------|-----|------|------|------|------|
| 45   | 133  | 0   | 425  | 41   | 160  | 186  |
| 1341 | 3865 | 821 | 2063 | 4040 | 1702 | 1572 |
| 0    | 0    | 0   | 18   | 0    | 16   | 21   |
| 11   | 258  | 23  | 216  | 157  | 181  | 744  |
| 0    | 17   | 0   | 78   | 0    | 24   | 37   |
| 0    | 0    | 0   | 0    | 0    | 41   | 37   |
| 104  | 365  | 162 | 1162 | 286  | 427  | 534  |
| 14   | 26   | 0   | 20   | 74   | 11   | 21   |
| 0    | 0    | 0   | 0    | 47   | 44   | 0    |
| 0    | 0    | 0   | 203  | 0    | 47   | 0    |
| 0    | 28   | 0   | 368  | 0    | 42   | 0    |
| 0    | 11   | 0   | 77   | 0    | 107  | 48   |
| 0    | 47   | 0   | 0    | 40   | 83   | 0    |
| 0    | 23   | 0   | 0    | 78   | 78   | 0    |
| 74   | 120  | 0   | 589  | 1545 | 1823 | 30   |
| 1412 | 533  | 259 | 571  | 1305 | 1566 | 551  |
| 12   | 224  | 11  | 240  | 800  | 934  | 35   |
| 0    | 179  | 18  | 120  | 768  | 577  | 119  |
| 0    | 46   | 0   | 51   | 341  | 264  | 10   |
| 0    | 0    | 0   | 0    | 20   | 33   | 0    |
| 0    | 97   | 0   | 268  | 457  | 482  | 43   |
| 0    | 30   | 0   | 0    | 159  | 242  | 14   |
| 0    | 0    | 0   | 0    | 92   | 32   | 0    |
| 0    | 54   | 0   | 0    | 535  | 907  | 24   |
| 0    | 75   | 13  | 78   | 143  | 69   | 664  |
| 0    | 0    | 0   | 0    | 72   | 247  | 0    |
| 0    | 0    | 0   | 0    | 0    | 31   | 0    |
| 0    | 0    | 0   | 0    | 52   | 100  | 0    |
| 0    | 25   | 0   | 0    | 176  | 154  | 0    |
| 0    | 0    | 0   | 201  | 234  | 442  | 0    |
| 0    | 0    | 0   | 80   | 94   | 116  | 42   |
| 0    | 0    | 0   | 73   | 0    | 36   | 0    |
| 0    | 0    | 0   | 85   | 155  | 348  | 269  |
| 11   | 131  | 35  | 174  | 229  | 92   | 1041 |
| 0    | 22   | 11  | 115  | 108  | 15   | 26   |
| 0    | 91   | 47  | 74   | 31   | 43   | 39   |
| 0    | 0    | 0   | 0    | 86   | 37   | 138  |
| 0    | 0    | 0   | 24   | 0    | 12   | 40   |
| 71   | 141  | 86  | 199  | 137  | 90   | 671  |
| 0    | 65   | 23  | 196  | 91   | 167  | 10   |
| 14   | 13   | 34  | 60   | 384  | 95   | 50   |
| 26   | 1778 | 101 | 0    | 8001 | 8112 | 209  |
| 0    | 0    | 0   | 0    | 203  | 153  | 0    |
| 0    | 1135 | 44  | 0    | 6834 | 4569 | 257  |
| 0    | 0    | 0   | 0    | 0    | 72   | 0    |
| 0    | 1078 | 19  | 0    | 4446 | 5206 | 169  |

|    |     |     |     |     |     |     |
|----|-----|-----|-----|-----|-----|-----|
| 0  | 12  | 0   | 0   | 211 | 106 | 0   |
| 0  | 67  | 10  | 56  | 89  | 170 | 0   |
| 0  | 115 | 82  | 109 | 931 | 949 | 52  |
| 0  | 16  | 0   | 28  | 67  | 52  | 11  |
| 0  | 20  | 0   | 225 | 0   | 10  | 11  |
| 0  | 0   | 0   | 0   | 30  | 44  | 0   |
| 0  | 0   | 0   | 0   | 0   | 11  | 0   |
| 0  | 0   | 0   | 0   | 0   | 12  | 0   |
| 0  | 11  | 0   | 17  | 0   | 10  | 0   |
| 0  | 77  | 12  | 181 | 554 | 598 | 41  |
| 63 | 0   | 0   | 10  | 36  | 0   | 42  |
| 10 | 0   | 0   | 45  | 37  | 0   | 0   |
| 0  | 15  | 0   | 27  | 14  | 0   | 37  |
| 36 | 0   | 0   | 37  | 19  | 0   | 11  |
| 0  | 54  | 0   | 47  | 166 | 0   | 100 |
| 0  | 0   | 0   | 23  | 10  | 0   | 44  |
| 0  | 11  | 0   | 0   | 53  | 0   | 0   |
| 0  | 13  | 0   | 13  | 17  | 0   | 56  |
| 0  | 0   | 0   | 712 | 0   | 0   | 11  |
| 0  | 0   | 0   | 81  | 0   | 0   | 0   |
| 0  | 0   | 0   | 0   | 18  | 0   | 0   |
| 0  | 0   | 0   | 0   | 43  | 0   | 11  |
| 0  | 23  | 0   | 0   | 40  | 0   | 0   |
| 0  | 12  | 213 | 10  | 0   | 0   | 33  |
| 0  | 10  | 0   | 13  | 108 | 0   | 0   |
| 0  | 0   | 28  | 0   | 56  | 0   | 0   |
| 0  | 0   | 10  | 0   | 0   | 0   | 0   |
| 19 | 0   | 0   | 0   | 22  | 0   | 0   |
| 0  | 0   | 0   | 0   | 43  | 0   | 12  |
| 0  | 0   | 0   | 59  | 29  | 0   | 0   |
| 0  | 0   | 0   | 12  | 0   | 0   | 0   |
| 0  | 0   | 0   | 0   | 0   | 0   | 0   |
| 0  | 0   | 14  | 0   | 0   | 0   | 0   |
| 0  | 0   | 0   | 0   | 10  | 0   | 0   |
| 76 | 10  | 10  | 0   | 0   | 0   | 0   |
| 0  | 0   | 0   | 0   | 0   | 0   | 0   |
| 0  | 0   | 0   | 0   | 0   | 0   | 0   |
| 0  | 0   | 12  | 0   | 0   | 0   | 0   |
| 0  | 0   | 0   | 0   | 0   | 0   | 0   |
| 0  | 0   | 250 | 0   | 20  | 0   | 0   |
| 0  | 0   | 0   | 0   | 0   | 0   | 0   |
| 0  | 0   | 57  | 0   | 15  | 0   | 0   |
| 0  | 0   | 0   | 0   | 0   | 0   | 0   |
| 0  | 0   | 0   | 0   | 15  | 0   | 39  |
| 14 | 0   | 0   | 0   | 0   | 0   | 99  |
| 0  | 0   | 0   | 68  | 0   | 0   | 0   |

|     |    |    |     |     |   |     |
|-----|----|----|-----|-----|---|-----|
| 0   | 0  | 0  | 57  | 0   | 0 | 0   |
| 0   | 0  | 0  | 0   | 0   | 0 | 0   |
| 0   | 0  | 0  | 0   | 0   | 0 | 0   |
| 0   | 18 | 0  | 103 | 0   | 0 | 13  |
| 0   | 0  | 0  | 0   | 67  | 0 | 0   |
| 0   | 0  | 0  | 0   | 0   | 0 | 0   |
| 0   | 0  | 22 | 0   | 11  | 0 | 0   |
| 0   | 0  | 0  | 0   | 0   | 0 | 0   |
| 0   | 0  | 0  | 0   | 0   | 0 | 0   |
| 0   | 64 | 0  | 0   | 25  | 0 | 0   |
| 0   | 0  | 0  | 40  | 0   | 0 | 0   |
| 0   | 11 | 0  | 10  | 11  | 0 | 0   |
| 0   | 0  | 0  | 0   | 0   | 0 | 0   |
| 0   | 0  | 0  | 43  | 0   | 0 | 10  |
| 27  | 57 | 0  | 0   | 0   | 0 | 0   |
| 34  | 0  | 0  | 0   | 0   | 0 | 0   |
| 67  | 0  | 0  | 0   | 0   | 0 | 0   |
| 0   | 0  | 0  | 0   | 0   | 0 | 0   |
| 0   | 40 | 0  | 0   | 31  | 0 | 115 |
| 0   | 35 | 0  | 0   | 28  | 0 | 125 |
| 0   | 0  | 0  | 0   | 0   | 0 | 0   |
| 0   | 0  | 0  | 0   | 0   | 0 | 52  |
| 0   | 0  | 0  | 38  | 28  | 0 | 0   |
| 83  | 0  | 0  | 0   | 0   | 0 | 0   |
| 0   | 0  | 0  | 0   | 0   | 0 | 0   |
| 11  | 0  | 0  | 0   | 0   | 0 | 0   |
| 0   | 0  | 0  | 70  | 0   | 0 | 0   |
| 0   | 0  | 0  | 0   | 0   | 0 | 0   |
| 0   | 0  | 0  | 0   | 0   | 0 | 0   |
| 0   | 0  | 0  | 0   | 0   | 0 | 0   |
| 0   | 0  | 0  | 0   | 0   | 0 | 0   |
| 0   | 0  | 0  | 0   | 23  | 0 | 0   |
| 0   | 0  | 0  | 0   | 0   | 0 | 0   |
| 30  | 0  | 0  | 118 | 66  | 0 | 0   |
| 0   | 0  | 0  | 0   | 383 | 0 | 0   |
| 0   | 0  | 0  | 91  | 0   | 0 | 0   |
| 0   | 10 | 0  | 0   | 131 | 0 | 0   |
| 29  | 29 | 31 | 16  | 31  | 0 | 46  |
| 0   | 0  | 0  | 0   | 93  | 0 | 0   |
| 0   | 0  | 0  | 0   | 0   | 0 | 0   |
| 28  | 0  | 31 | 618 | 0   | 0 | 10  |
| 0   | 0  | 0  | 423 | 0   | 0 | 0   |
| 0   | 0  | 0  | 245 | 0   | 0 | 15  |
| 0   | 0  | 0  | 0   | 0   | 0 | 0   |
| 126 | 0  | 11 | 0   | 133 | 0 | 0   |
| 0   | 0  | 0  | 0   | 0   | 0 | 0   |

|    |     |     |     |     |   |     |
|----|-----|-----|-----|-----|---|-----|
| 0  | 0   | 0   | 118 | 29  | 0 | 0   |
| 0  | 0   | 0   | 11  | 63  | 0 | 0   |
| 0  | 0   | 0   | 0   | 0   | 0 | 0   |
| 0  | 0   | 0   | 22  | 0   | 0 | 0   |
| 0  | 32  | 112 | 28  | 323 | 0 | 0   |
| 83 | 79  | 129 | 207 | 195 | 0 | 75  |
| 0  | 0   | 0   | 0   | 15  | 0 | 0   |
| 0  | 0   | 0   | 61  | 0   | 0 | 0   |
| 0  | 0   | 0   | 43  | 0   | 0 | 0   |
| 53 | 0   | 0   | 13  | 0   | 0 | 0   |
| 0  | 0   | 0   | 25  | 0   | 0 | 0   |
| 0  | 0   | 0   | 0   | 0   | 0 | 0   |
| 10 | 0   | 140 | 138 | 0   | 0 | 0   |
| 0  | 0   | 0   | 0   | 0   | 0 | 0   |
| 0  | 0   | 0   | 0   | 0   | 0 | 0   |
| 0  | 0   | 175 | 0   | 0   | 0 | 0   |
| 0  | 0   | 152 | 0   | 0   | 0 | 0   |
| 0  | 0   | 0   | 0   | 24  | 0 | 0   |
| 84 | 23  | 11  | 10  | 21  | 0 | 101 |
| 0  | 0   | 0   | 0   | 0   | 0 | 0   |
| 0  | 0   | 38  | 0   | 0   | 0 | 0   |
| 0  | 0   | 106 | 0   | 0   | 0 | 0   |
| 0  | 0   | 204 | 29  | 0   | 0 | 0   |
| 0  | 0   | 0   | 0   | 135 | 0 | 10  |
| 0  | 0   | 0   | 0   | 39  | 0 | 30  |
| 0  | 11  | 0   | 86  | 10  | 0 | 127 |
| 0  | 0   | 0   | 0   | 0   | 0 | 0   |
| 0  | 0   | 0   | 0   | 0   | 0 | 24  |
| 0  | 43  | 30  | 0   | 14  | 0 | 176 |
| 0  | 0   | 0   | 0   | 0   | 0 | 44  |
| 0  | 0   | 0   | 0   | 0   | 0 | 0   |
| 0  | 0   | 0   | 10  | 0   | 0 | 154 |
| 0  | 0   | 0   | 0   | 0   | 0 | 0   |
| 0  | 12  | 10  | 64  | 36  | 0 | 176 |
| 0  | 0   | 0   | 0   | 24  | 0 | 0   |
| 0  | 0   | 0   | 0   | 0   | 0 | 0   |
| 0  | 0   | 0   | 0   | 0   | 0 | 0   |
| 0  | 0   | 0   | 11  | 0   | 0 | 0   |
| 0  | 0   | 0   | 0   | 12  | 0 | 0   |
| 0  | 17  | 0   | 23  | 10  | 0 | 21  |
| 0  | 0   | 0   | 0   | 0   | 0 | 49  |
| 0  | 0   | 0   | 0   | 0   | 0 | 0   |
| 0  | 0   | 0   | 0   | 0   | 0 | 36  |
| 0  | 0   | 0   | 0   | 0   | 0 | 0   |
| 0  | 0   | 0   | 0   | 0   | 0 | 0   |
| 41 | 177 | 72  | 0   | 147 | 0 | 388 |



|    |     |    |      |     |   |     |
|----|-----|----|------|-----|---|-----|
| 0  | 0   | 0  | 1013 | 213 | 0 | 24  |
| 0  | 0   | 0  | 0    | 0   | 0 | 0   |
| 0  | 0   | 0  | 0    | 0   | 0 | 0   |
| 0  | 0   | 0  | 36   | 0   | 0 | 0   |
| 0  | 0   | 0  | 38   | 0   | 0 | 213 |
| 0  | 0   | 0  | 0    | 0   | 0 | 12  |
| 0  | 0   | 0  | 0    | 19  | 0 | 0   |
| 0  | 11  | 11 | 0    | 0   | 0 | 197 |
| 0  | 0   | 0  | 0    | 0   | 0 | 0   |
| 0  | 0   | 0  | 0    | 0   | 0 | 0   |
| 0  | 0   | 0  | 60   | 91  | 0 | 13  |
| 0  | 12  | 13 | 0    | 0   | 0 | 151 |
| 0  | 33  | 60 | 0    | 67  | 0 | 804 |
| 0  | 0   | 0  | 0    | 0   | 0 | 42  |
| 0  | 22  | 55 | 0    | 64  | 0 | 309 |
| 29 | 0   | 0  | 0    | 0   | 0 | 27  |
| 0  | 0   | 0  | 0    | 0   | 0 | 40  |
| 12 | 0   | 0  | 45   | 0   | 0 | 0   |
| 99 | 0   | 0  | 0    | 0   | 0 | 0   |
| 0  | 0   | 0  | 0    | 0   | 0 | 0   |
| 0  | 0   | 24 | 0    | 0   | 0 | 0   |
| 0  | 0   | 0  | 17   | 19  | 0 | 23  |
| 0  | 0   | 0  | 23   | 34  | 0 | 0   |
| 10 | 11  | 30 | 39   | 66  | 0 | 0   |
| 0  | 0   | 0  | 0    | 0   | 0 | 167 |
| 0  | 0   | 0  | 0    | 0   | 0 | 122 |
| 12 | 117 | 0  | 207  | 25  | 0 | 532 |
| 0  | 0   | 0  | 38   | 0   | 0 | 99  |
| 0  | 51  | 0  | 114  | 15  | 0 | 358 |
| 0  | 0   | 0  | 0    | 0   | 0 | 0   |
| 10 | 0   | 0  | 0    | 19  | 0 | 10  |
| 0  | 13  | 0  | 0    | 26  | 0 | 231 |
| 0  | 0   | 0  | 0    | 0   | 0 | 0   |
| 10 | 0   | 0  | 0    | 32  | 0 | 171 |
| 0  | 0   | 0  | 0    | 10  | 0 | 0   |
| 0  | 0   | 0  | 0    | 11  | 0 | 23  |
| 0  | 0   | 0  | 0    | 0   | 0 | 0   |
| 0  | 59  | 0  | 25   | 48  | 0 | 134 |
| 0  | 42  | 25 | 0    | 31  | 0 | 203 |
| 0  | 21  | 0  | 0    | 0   | 0 | 0   |
| 0  | 0   | 0  | 12   | 0   | 0 | 0   |
| 0  | 0   | 0  | 0    | 53  | 0 | 38  |
| 0  | 0   | 0  | 0    | 0   | 0 | 0   |
| 0  | 0   | 0  | 0    | 0   | 0 | 0   |
| 0  | 11  | 0  | 0    | 0   | 0 | 0   |
| 0  | 0   | 0  | 0    | 0   | 0 | 0   |

|    |    |      |     |     |   |     |
|----|----|------|-----|-----|---|-----|
| 0  | 0  | 0    | 0   | 0   | 0 | 0   |
| 11 | 56 | 0    | 246 | 132 | 0 | 60  |
| 0  | 0  | 0    | 0   | 0   | 0 | 0   |
| 0  | 0  | 0    | 13  | 0   | 0 | 16  |
| 20 | 0  | 0    | 32  | 64  | 0 | 0   |
| 0  | 0  | 14   | 0   | 17  | 0 | 16  |
| 0  | 0  | 0    | 0   | 0   | 0 | 11  |
| 0  | 0  | 0    | 0   | 0   | 0 | 0   |
| 0  | 14 | 11   | 0   | 13  | 0 | 99  |
| 0  | 0  | 0    | 35  | 11  | 0 | 121 |
| 12 | 0  | 0    | 13  | 0   | 0 | 0   |
| 0  | 0  | 0    | 0   | 55  | 0 | 47  |
| 0  | 0  | 0    | 0   | 0   | 0 | 0   |
| 0  | 0  | 12   | 0   | 0   | 0 | 0   |
| 0  | 0  | 85   | 0   | 0   | 0 | 0   |
| 0  | 0  | 0    | 0   | 0   | 0 | 0   |
| 21 | 0  | 0    | 12  | 10  | 0 | 95  |
| 0  | 0  | 53   | 0   | 0   | 0 | 0   |
| 25 | 28 | 0    | 43  | 28  | 0 | 0   |
| 0  | 0  | 0    | 10  | 0   | 0 | 0   |
| 0  | 35 | 10   | 11  | 51  | 0 | 792 |
| 0  | 0  | 0    | 0   | 0   | 0 | 0   |
| 0  | 0  | 0    | 21  | 0   | 0 | 0   |
| 0  | 0  | 269  | 30  | 0   | 0 | 0   |
| 0  | 0  | 0    | 0   | 0   | 0 | 0   |
| 0  | 0  | 40   | 0   | 0   | 0 | 13  |
| 0  | 0  | 0    | 0   | 0   | 0 | 0   |
| 0  | 0  | 0    | 10  | 0   | 0 | 0   |
| 0  | 0  | 229  | 0   | 45  | 0 | 0   |
| 0  | 0  | 80   | 0   | 0   | 0 | 0   |
| 0  | 0  | 480  | 14  | 0   | 0 | 25  |
| 0  | 21 | 1338 | 66  | 21  | 0 | 43  |
| 0  | 13 | 339  | 0   | 0   | 0 | 0   |
| 0  | 10 | 117  | 0   | 0   | 0 | 0   |
| 20 | 0  | 0    | 10  | 0   | 0 | 0   |
| 0  | 0  | 0    | 0   | 0   | 0 | 0   |
| 0  | 38 | 0    | 10  | 0   | 0 | 59  |
| 48 | 0  | 161  | 10  | 0   | 0 | 63  |
| 10 | 0  | 48   | 0   | 0   | 0 | 0   |
| 64 | 0  | 17   | 0   | 0   | 0 | 21  |
| 0  | 0  | 0    | 0   | 0   | 0 | 0   |
| 0  | 0  | 105  | 0   | 0   | 0 | 13  |
| 0  | 0  | 222  | 0   | 0   | 0 | 0   |
| 0  | 0  | 138  | 0   | 0   | 0 | 0   |
| 32 | 0  | 91   | 0   | 0   | 0 | 0   |
| 11 | 0  | 0    | 0   | 0   | 0 | 0   |

|    |    |    |     |    |   |     |
|----|----|----|-----|----|---|-----|
| 0  | 0  | 0  | 0   | 0  | 0 | 0   |
| 0  | 0  | 0  | 0   | 0  | 0 | 0   |
| 0  | 0  | 30 | 0   | 0  | 0 | 0   |
| 10 | 0  | 0  | 20  | 13 | 0 | 0   |
| 0  | 11 | 13 | 13  | 0  | 0 | 10  |
| 0  | 0  | 0  | 0   | 0  | 0 | 0   |
| 0  | 0  | 0  | 0   | 0  | 0 | 0   |
| 0  | 0  | 0  | 14  | 0  | 0 | 27  |
| 0  | 0  | 0  | 0   | 0  | 0 | 0   |
| 0  | 0  | 0  | 145 | 56 | 0 | 14  |
| 0  | 0  | 0  | 288 | 0  | 0 | 0   |
| 0  | 0  | 0  | 95  | 35 | 0 | 0   |
| 0  | 0  | 0  | 0   | 0  | 0 | 0   |
| 0  | 0  | 0  | 44  | 0  | 0 | 0   |
| 0  | 0  | 0  | 0   | 0  | 0 | 0   |
| 0  | 14 | 0  | 10  | 37 | 0 | 0   |
| 0  | 0  | 0  | 0   | 0  | 0 | 0   |
| 0  | 0  | 0  | 0   | 0  | 0 | 0   |
| 0  | 0  | 0  | 59  | 0  | 0 | 0   |
| 0  | 12 | 0  | 0   | 39 | 0 | 0   |
| 0  | 0  | 0  | 0   | 0  | 0 | 0   |
| 10 | 0  | 0  | 0   | 11 | 0 | 0   |
| 0  | 0  | 0  | 0   | 16 | 0 | 0   |
| 0  | 0  | 0  | 0   | 0  | 0 | 0   |
| 13 | 0  | 0  | 0   | 0  | 0 | 0   |
| 0  | 0  | 0  | 0   | 0  | 0 | 0   |
| 0  | 0  | 0  | 205 | 0  | 0 | 0   |
| 0  | 0  | 0  | 0   | 0  | 0 | 0   |
| 0  | 0  | 0  | 0   | 43 | 0 | 0   |
| 0  | 0  | 0  | 10  | 0  | 0 | 0   |
| 0  | 10 | 0  | 0   | 86 | 0 | 33  |
| 0  | 0  | 0  | 0   | 99 | 0 | 0   |
| 0  | 0  | 0  | 0   | 27 | 0 | 0   |
| 0  | 0  | 0  | 0   | 0  | 0 | 0   |
| 0  | 0  | 10 | 947 | 57 | 0 | 24  |
| 0  | 0  | 0  | 81  | 10 | 0 | 0   |
| 0  | 0  | 0  | 15  | 0  | 0 | 0   |
| 0  | 0  | 0  | 174 | 0  | 0 | 0   |
| 0  | 0  | 0  | 63  | 0  | 0 | 21  |
| 18 | 0  | 14 | 0   | 0  | 0 | 0   |
| 0  | 0  | 0  | 0   | 0  | 0 | 0   |
| 0  | 0  | 0  | 105 | 0  | 0 | 0   |
| 0  | 0  | 0  | 0   | 0  | 0 | 0   |
| 0  | 0  | 0  | 0   | 0  | 0 | 0   |
| 10 | 38 | 0  | 22  | 0  | 0 | 135 |
| 0  | 0  | 0  | 0   | 14 | 0 | 43  |

|    |     |      |     |     |   |     |
|----|-----|------|-----|-----|---|-----|
| 0  | 0   | 0    | 102 | 56  | 0 | 95  |
| 0  | 0   | 0    | 0   | 0   | 0 | 27  |
| 0  | 0   | 0    | 0   | 13  | 0 | 0   |
| 0  | 128 | 108  | 32  | 86  | 0 | 30  |
| 0  | 10  | 0    | 0   | 14  | 0 | 0   |
| 0  | 0   | 0    | 0   | 23  | 0 | 28  |
| 0  | 0   | 0    | 0   | 0   | 0 | 0   |
| 0  | 61  | 0    | 0   | 169 | 0 | 0   |
| 0  | 12  | 0    | 0   | 13  | 0 | 0   |
| 0  | 0   | 0    | 0   | 0   | 0 | 0   |
| 0  | 63  | 0    | 0   | 18  | 0 | 0   |
| 0  | 0   | 0    | 0   | 0   | 0 | 0   |
| 0  | 0   | 0    | 0   | 50  | 0 | 11  |
| 0  | 0   | 0    | 0   | 10  | 0 | 0   |
| 19 | 25  | 122  | 0   | 117 | 0 | 0   |
| 0  | 38  | 58   | 0   | 53  | 0 | 0   |
| 0  | 11  | 0    | 0   | 117 | 0 | 0   |
| 10 | 0   | 723  | 0   | 0   | 0 | 41  |
| 0  | 0   | 0    | 0   | 0   | 0 | 0   |
| 0  | 0   | 68   | 0   | 0   | 0 | 43  |
| 0  | 0   | 0    | 0   | 10  | 0 | 0   |
| 0  | 0   | 0    | 0   | 0   | 0 | 0   |
| 0  | 11  | 1705 | 0   | 0   | 0 | 136 |
| 0  | 0   | 0    | 36  | 0   | 0 | 10  |
| 48 | 0   | 0    | 12  | 0   | 0 | 0   |
| 27 | 12  | 0    | 46  | 0   | 0 | 109 |
| 0  | 0   | 0    | 0   | 26  | 0 | 0   |
| 0  | 0   | 0    | 10  | 24  | 0 | 0   |
| 0  | 0   | 0    | 170 | 0   | 0 | 0   |
| 0  | 0   | 0    | 73  | 0   | 0 | 0   |
| 0  | 0   | 0    | 0   | 0   | 0 | 0   |
| 0  | 0   | 10   | 0   | 0   | 0 | 16  |
| 0  | 0   | 0    | 0   | 0   | 0 | 0   |
| 0  | 0   | 91   | 0   | 0   | 0 | 0   |
| 0  | 0   | 0    | 13  | 0   | 0 | 0   |
| 0  | 0   | 0    | 28  | 0   | 0 | 0   |
| 0  | 0   | 13   | 0   | 0   | 0 | 0   |
| 0  | 65  | 0    | 0   | 35  | 0 | 0   |
| 0  | 10  | 0    | 0   | 12  | 0 | 0   |
| 0  | 0   | 0    | 0   | 0   | 0 | 0   |
| 0  | 73  | 0    | 169 | 101 | 0 | 235 |
| 0  | 99  | 0    | 194 | 0   | 0 | 17  |
| 0  | 0   | 0    | 0   | 35  | 0 | 0   |
| 0  | 0   | 0    | 73  | 35  | 0 | 0   |
| 0  | 0   | 0    | 15  | 0   | 0 | 0   |
| 0  | 0   | 0    | 0   | 0   | 0 | 29  |

|     |     |    |    |     |   |     |
|-----|-----|----|----|-----|---|-----|
| 0   | 0   | 0  | 0  | 0   | 0 | 10  |
| 0   | 0   | 0  | 0  | 0   | 0 | 0   |
| 0   | 28  | 0  | 29 | 0   | 0 | 0   |
| 0   | 0   | 0  | 0  | 0   | 0 | 0   |
| 0   | 0   | 0  | 0  | 0   | 0 | 10  |
| 0   | 0   | 0  | 0  | 11  | 0 | 0   |
| 0   | 0   | 0  | 0  | 0   | 0 | 372 |
| 0   | 0   | 0  | 20 | 86  | 0 | 0   |
| 25  | 26  | 11 | 0  | 24  | 0 | 0   |
| 0   | 15  | 0  | 0  | 756 | 0 | 0   |
| 744 | 20  | 0  | 11 | 0   | 0 | 42  |
| 0   | 0   | 0  | 0  | 0   | 0 | 11  |
| 0   | 0   | 0  | 43 | 0   | 0 | 0   |
| 0   | 20  | 0  | 85 | 12  | 0 | 0   |
| 0   | 0   | 0  | 16 | 0   | 0 | 113 |
| 0   | 0   | 0  | 10 | 0   | 0 | 55  |
| 0   | 85  | 0  | 18 | 0   | 0 | 0   |
| 0   | 0   | 0  | 48 | 0   | 0 | 82  |
| 0   | 0   | 0  | 0  | 0   | 0 | 0   |
| 0   | 0   | 0  | 0  | 0   | 0 | 28  |
| 0   | 0   | 0  | 0  | 0   | 0 | 0   |
| 0   | 0   | 0  | 45 | 0   | 0 | 41  |
| 0   | 0   | 0  | 0  | 0   | 0 | 0   |
| 0   | 0   | 0  | 0  | 0   | 0 | 0   |
| 0   | 0   | 0  | 0  | 0   | 0 | 0   |
| 0   | 0   | 0  | 0  | 0   | 0 | 0   |
| 0   | 0   | 0  | 0  | 0   | 0 | 0   |
| 11  | 64  | 0  | 0  | 54  | 0 | 306 |
| 0   | 0   | 0  | 0  | 0   | 0 | 71  |
| 0   | 0   | 0  | 0  | 0   | 0 | 98  |
| 0   | 45  | 0  | 49 | 12  | 0 | 536 |
| 0   | 52  | 0  | 16 | 84  | 0 | 176 |
| 0   | 0   | 0  | 40 | 0   | 0 | 231 |
| 0   | 0   | 0  | 0  | 13  | 0 | 0   |
| 0   | 0   | 0  | 0  | 0   | 0 | 0   |
| 0   | 0   | 0  | 0  | 0   | 0 | 0   |
| 0   | 0   | 0  | 0  | 0   | 0 | 0   |
| 0   | 0   | 0  | 10 | 0   | 0 | 0   |
| 0   | 0   | 0  | 0  | 0   | 0 | 0   |
| 0   | 0   | 0  | 0  | 0   | 0 | 0   |
| 0   | 0   | 0  | 0  | 0   | 0 | 0   |
| 0   | 0   | 0  | 0  | 0   | 0 | 0   |
| 0   | 194 | 10 | 0  | 129 | 0 | 0   |
| 0   | 0   | 0  | 0  | 0   | 0 | 0   |
| 0   | 27  | 0  | 0  | 0   | 0 | 0   |
| 0   | 0   | 0  | 0  | 0   | 0 | 0   |
| 0   | 0   | 0  | 0  | 0   | 0 | 0   |

|    |    |     |     |     |   |     |
|----|----|-----|-----|-----|---|-----|
| 0  | 0  | 0   | 0   | 0   | 0 | 10  |
| 0  | 0  | 0   | 0   | 0   | 0 | 0   |
| 0  | 0  | 0   | 0   | 142 | 0 | 0   |
| 0  | 0  | 0   | 0   | 0   | 0 | 0   |
| 0  | 15 | 0   | 41  | 10  | 0 | 12  |
| 0  | 0  | 0   | 0   | 33  | 0 | 0   |
| 0  | 0  | 0   | 0   | 0   | 0 | 0   |
| 0  | 16 | 0   | 0   | 0   | 0 | 0   |
| 0  | 0  | 0   | 13  | 0   | 0 | 0   |
| 0  | 0  | 0   | 62  | 0   | 0 | 0   |
| 33 | 0  | 0   | 0   | 0   | 0 | 0   |
| 0  | 0  | 0   | 114 | 0   | 0 | 26  |
| 0  | 0  | 0   | 0   | 0   | 0 | 0   |
| 0  | 0  | 247 | 0   | 0   | 0 | 0   |
| 0  | 0  | 0   | 130 | 46  | 0 | 21  |
| 0  | 0  | 106 | 0   | 0   | 0 | 22  |
| 0  | 0  | 0   | 0   | 0   | 0 | 0   |
| 0  | 0  | 0   | 0   | 0   | 0 | 0   |
| 0  | 0  | 0   | 0   | 0   | 0 | 0   |
| 0  | 0  | 0   | 0   | 0   | 0 | 0   |
| 0  | 22 | 0   | 0   | 14  | 0 | 211 |
| 0  | 0  | 0   | 36  | 0   | 0 | 0   |
| 0  | 0  | 0   | 38  | 0   | 0 | 0   |
| 36 | 0  | 54  | 0   | 0   | 0 | 0   |
| 0  | 0  | 28  | 0   | 37  | 0 | 0   |
| 0  | 0  | 0   | 0   | 0   | 0 | 11  |
| 0  | 0  | 0   | 0   | 0   | 0 | 0   |
| 0  | 0  | 0   | 0   | 0   | 0 | 0   |
| 70 | 0  | 0   | 10  | 0   | 0 | 0   |
| 0  | 0  | 13  | 0   | 0   | 0 | 0   |
| 0  | 0  | 0   | 0   | 0   | 0 | 0   |
| 0  | 0  | 0   | 0   | 0   | 0 | 0   |
| 0  | 21 | 0   | 0   | 48  | 0 | 23  |
| 12 | 0  | 0   | 0   | 0   | 0 | 0   |
| 0  | 0  | 0   | 0   | 0   | 0 | 0   |
| 24 | 11 | 22  | 10  | 75  | 0 | 24  |
| 0  | 0  | 0   | 0   | 0   | 0 | 0   |
| 0  | 0  | 0   | 0   | 0   | 0 | 0   |
| 0  | 0  | 0   | 0   | 0   | 0 | 0   |
| 0  | 0  | 0   | 0   | 0   | 0 | 0   |
| 0  | 0  | 0   | 0   | 0   | 0 | 0   |
| 0  | 0  | 0   | 0   | 0   | 0 | 0   |
| 0  | 0  | 0   | 0   | 0   | 0 | 19  |
| 0  | 0  | 0   | 0   | 0   | 0 | 13  |
| 0  | 0  | 0   | 0   | 0   | 0 | 21  |
| 0  | 0  | 0   | 85  | 0   | 0 | 0   |

|     |    |    |    |    |   |    |
|-----|----|----|----|----|---|----|
| 0   | 0  | 0  | 36 | 0  | 0 | 0  |
| 0   | 0  | 0  | 0  | 0  | 0 | 0  |
| 0   | 0  | 0  | 0  | 0  | 0 | 0  |
| 0   | 0  | 50 | 0  | 0  | 0 | 24 |
| 0   | 21 | 0  | 0  | 0  | 0 | 0  |
| 0   | 0  | 0  | 0  | 0  | 0 | 0  |
| 38  | 0  | 0  | 0  | 0  | 0 | 0  |
| 0   | 0  | 0  | 0  | 0  | 0 | 0  |
| 0   | 0  | 0  | 0  | 0  | 0 | 0  |
| 0   | 0  | 0  | 0  | 0  | 0 | 0  |
| 0   | 0  | 0  | 0  | 0  | 0 | 0  |
| 0   | 51 | 0  | 0  | 0  | 0 | 0  |
| 0   | 0  | 0  | 11 | 0  | 0 | 0  |
| 0   | 0  | 0  | 35 | 10 | 0 | 0  |
| 0   | 0  | 0  | 0  | 0  | 0 | 0  |
| 0   | 0  | 0  | 0  | 0  | 0 | 0  |
| 0   | 0  | 15 | 0  | 0  | 0 | 0  |
| 0   | 0  | 0  | 0  | 58 | 0 | 0  |
| 0   | 0  | 0  | 0  | 0  | 0 | 0  |
| 0   | 0  | 0  | 32 | 0  | 0 | 33 |
| 0   | 0  | 0  | 0  | 25 | 0 | 52 |
| 0   | 0  | 0  | 0  | 14 | 0 | 21 |
| 0   | 0  | 0  | 0  | 0  | 0 | 0  |
| 0   | 0  | 0  | 10 | 0  | 0 | 0  |
| 0   | 0  | 0  | 0  | 0  | 0 | 0  |
| 0   | 0  | 0  | 0  | 0  | 0 | 10 |
| 0   | 71 | 0  | 0  | 12 | 0 | 16 |
| 0   | 0  | 0  | 0  | 0  | 0 | 0  |
| 0   | 0  | 0  | 0  | 0  | 0 | 0  |
| 0   | 0  | 0  | 0  | 61 | 0 | 0  |
| 0   | 0  | 0  | 61 | 0  | 0 | 0  |
| 0   | 0  | 0  | 0  | 0  | 0 | 0  |
| 0   | 0  | 0  | 0  | 0  | 0 | 0  |
| 0   | 0  | 0  | 53 | 51 | 0 | 0  |
| 0   | 0  | 0  | 0  | 0  | 0 | 0  |
| 0   | 0  | 0  | 79 | 0  | 0 | 0  |
| 0   | 0  | 0  | 0  | 0  | 0 | 0  |
| 0   | 0  | 0  | 0  | 0  | 0 | 0  |
| 0   | 0  | 74 | 0  | 0  | 0 | 41 |
| 0   | 0  | 0  | 0  | 0  | 0 | 0  |
| 652 | 0  | 27 | 0  | 87 | 0 | 0  |
| 0   | 0  | 0  | 13 | 0  | 0 | 0  |
| 0   | 0  | 0  | 0  | 0  | 0 | 0  |
| 0   | 0  | 0  | 0  | 0  | 0 | 0  |
| 0   | 0  | 0  | 0  | 0  | 0 | 0  |
| 0   | 0  | 0  | 0  | 0  | 0 | 0  |

|     |    |     |    |    |   |     |
|-----|----|-----|----|----|---|-----|
| 0   | 0  | 0   | 0  | 0  | 0 | 0   |
| 0   | 0  | 0   | 0  | 0  | 0 | 0   |
| 0   | 0  | 0   | 0  | 0  | 0 | 0   |
| 0   | 0  | 0   | 0  | 0  | 0 | 0   |
| 0   | 0  | 0   | 0  | 0  | 0 | 0   |
| 0   | 0  | 0   | 0  | 0  | 0 | 0   |
| 0   | 0  | 0   | 0  | 25 | 0 | 0   |
| 12  | 0  | 0   | 0  | 10 | 0 | 0   |
| 0   | 0  | 0   | 0  | 0  | 0 | 0   |
| 0   | 0  | 0   | 0  | 0  | 0 | 0   |
| 0   | 0  | 0   | 0  | 0  | 0 | 0   |
| 0   | 0  | 0   | 0  | 0  | 0 | 0   |
| 0   | 0  | 0   | 0  | 0  | 0 | 0   |
| 0   | 0  | 0   | 0  | 0  | 0 | 0   |
| 0   | 0  | 0   | 0  | 0  | 0 | 0   |
| 0   | 0  | 0   | 0  | 0  | 0 | 0   |
| 0   | 0  | 0   | 0  | 0  | 0 | 0   |
| 0   | 0  | 0   | 0  | 0  | 0 | 328 |
| 0   | 11 | 0   | 0  | 0  | 0 | 0   |
| 52  | 0  | 24  | 21 | 0  | 0 | 0   |
| 169 | 0  | 0   | 0  | 0  | 0 | 0   |
| 0   | 0  | 10  | 0  | 0  | 0 | 0   |
| 0   | 10 | 0   | 0  | 0  | 0 | 14  |
| 0   | 0  | 0   | 0  | 0  | 0 | 0   |
| 0   | 0  | 0   | 0  | 0  | 0 | 0   |
| 0   | 0  | 0   | 0  | 0  | 0 | 0   |
| 0   | 0  | 0   | 0  | 0  | 0 | 0   |
| 10  | 0  | 0   | 0  | 0  | 0 | 0   |
| 0   | 0  | 0   | 0  | 13 | 0 | 18  |
| 0   | 0  | 0   | 0  | 0  | 0 | 0   |
| 0   | 13 | 0   | 23 | 0  | 0 | 0   |
| 0   | 0  | 0   | 0  | 0  | 0 | 0   |
| 0   | 0  | 0   | 0  | 0  | 0 | 0   |
| 0   | 12 | 0   | 67 | 0  | 0 | 0   |
| 0   | 0  | 0   | 0  | 0  | 0 | 0   |
| 0   | 0  | 0   | 0  | 0  | 0 | 0   |
| 0   | 44 | 11  | 0  | 11 | 0 | 30  |
| 0   | 0  | 0   | 0  | 0  | 0 | 0   |
| 0   | 0  | 96  | 22 | 0  | 0 | 0   |
| 0   | 0  | 12  | 0  | 0  | 0 | 0   |
| 0   | 0  | 12  | 0  | 0  | 0 | 0   |
| 0   | 0  | 56  | 0  | 0  | 0 | 0   |
| 0   | 0  | 54  | 0  | 0  | 0 | 0   |
| 0   | 0  | 116 | 0  | 0  | 0 | 0   |
| 0   | 0  | 23  | 0  | 0  | 0 | 0   |
| 0   | 0  | 123 | 0  | 0  | 0 | 0   |
| 0   | 0  | 429 | 25 | 10 | 0 | 333 |



|    |     |     |    |     |   |     |
|----|-----|-----|----|-----|---|-----|
| 0  | 0   | 29  | 0  | 0   | 0 | 0   |
| 0  | 0   | 45  | 0  | 0   | 0 | 0   |
| 0  | 0   | 32  | 0  | 0   | 0 | 0   |
| 0  | 0   | 41  | 0  | 0   | 0 | 0   |
| 0  | 0   | 44  | 0  | 0   | 0 | 0   |
| 0  | 0   | 10  | 0  | 0   | 0 | 0   |
| 0  | 0   | 33  | 0  | 0   | 0 | 0   |
| 0  | 0   | 11  | 0  | 11  | 0 | 0   |
| 0  | 0   | 46  | 0  | 0   | 0 | 0   |
| 0  | 0   | 188 | 0  | 0   | 0 | 0   |
| 0  | 0   | 11  | 0  | 0   | 0 | 0   |
| 0  | 52  | 45  | 37 | 59  | 0 | 109 |
| 0  | 0   | 118 | 0  | 0   | 0 | 0   |
| 95 | 43  | 131 | 0  | 84  | 0 | 12  |
| 0  | 165 | 13  | 0  | 581 | 0 | 0   |
| 0  | 0   | 10  | 13 | 0   | 0 | 0   |
| 10 | 0   | 10  | 0  | 0   | 0 | 0   |
| 0  | 0   | 10  | 0  | 0   | 0 | 0   |
| 0  | 0   | 10  | 0  | 0   | 0 | 0   |
| 0  | 0   | 14  | 0  | 0   | 0 | 0   |
| 0  | 0   | 49  | 0  | 0   | 0 | 0   |
| 0  | 0   | 11  | 0  | 0   | 0 | 0   |
| 0  | 0   | 37  | 0  | 11  | 0 | 10  |
| 0  | 0   | 117 | 0  | 0   | 0 | 0   |
| 0  | 0   | 13  | 0  | 0   | 0 | 0   |
| 0  | 0   | 22  | 0  | 0   | 0 | 0   |
| 0  | 0   | 10  | 0  | 0   | 0 | 0   |
| 0  | 0   | 97  | 0  | 0   | 0 | 0   |
| 0  | 0   | 10  | 0  | 0   | 0 | 0   |
| 0  | 0   | 37  | 0  | 0   | 0 | 0   |
| 0  | 0   | 41  | 0  | 0   | 0 | 0   |
| 0  | 0   | 40  | 0  | 0   | 0 | 47  |
| 0  | 0   | 133 | 13 | 0   | 0 | 96  |
| 0  | 0   | 25  | 0  | 0   | 0 | 0   |
| 33 | 0   | 46  | 0  | 110 | 0 | 53  |
| 0  | 0   | 39  | 0  | 95  | 0 | 0   |
| 0  | 0   | 101 | 0  | 81  | 0 | 0   |
| 0  | 0   | 65  | 0  | 0   | 0 | 0   |
| 0  | 0   | 40  | 0  | 0   | 0 | 0   |
| 0  | 0   | 12  | 0  | 0   | 0 | 0   |
| 0  | 0   | 31  | 0  | 0   | 0 | 0   |
| 0  | 61  | 10  | 0  | 0   | 0 | 0   |
| 0  | 0   | 72  | 0  | 0   | 0 | 0   |
| 0  | 0   | 42  | 0  | 0   | 0 | 0   |
| 0  | 0   | 83  | 0  | 45  | 0 | 39  |
| 0  | 0   | 30  | 0  | 0   | 0 | 0   |

|   |    |     |     |    |   |    |
|---|----|-----|-----|----|---|----|
| 0 | 0  | 77  | 22  | 33 | 0 | 0  |
| 0 | 0  | 228 | 11  | 12 | 0 | 0  |
| 0 | 0  | 34  | 0   | 0  | 0 | 0  |
| 0 | 0  | 19  | 0   | 0  | 0 | 0  |
| 0 | 0  | 16  | 0   | 0  | 0 | 0  |
| 0 | 0  | 97  | 0   | 0  | 0 | 0  |
| 0 | 0  | 65  | 0   | 0  | 0 | 0  |
| 0 | 0  | 20  | 0   | 0  | 0 | 0  |
| 0 | 0  | 10  | 0   | 0  | 0 | 0  |
| 0 | 0  | 12  | 0   | 0  | 0 | 0  |
| 0 | 0  | 38  | 0   | 0  | 0 | 11 |
| 0 | 0  | 12  | 0   | 0  | 0 | 0  |
| 0 | 0  | 22  | 0   | 0  | 0 | 0  |
| 0 | 0  | 23  | 0   | 0  | 0 | 0  |
| 0 | 0  | 16  | 0   | 0  | 0 | 0  |
| 0 | 0  | 29  | 0   | 0  | 0 | 0  |
| 0 | 0  | 11  | 0   | 13 | 0 | 52 |
| 0 | 0  | 49  | 13  | 0  | 0 | 0  |
| 0 | 0  | 12  | 0   | 0  | 0 | 0  |
| 0 | 0  | 58  | 0   | 0  | 0 | 10 |
| 0 | 0  | 47  | 0   | 0  | 0 | 0  |
| 0 | 0  | 27  | 0   | 0  | 0 | 0  |
| 0 | 0  | 10  | 0   | 0  | 0 | 0  |
| 0 | 0  | 189 | 0   | 0  | 0 | 0  |
| 0 | 0  | 226 | 0   | 0  | 0 | 0  |
| 0 | 0  | 60  | 0   | 0  | 0 | 0  |
| 0 | 0  | 14  | 0   | 0  | 0 | 0  |
| 0 | 0  | 24  | 0   | 0  | 0 | 0  |
| 0 | 0  | 14  | 0   | 0  | 0 | 0  |
| 0 | 0  | 24  | 368 | 0  | 0 | 0  |
| 0 | 0  | 26  | 0   | 0  | 0 | 0  |
| 0 | 32 | 12  | 0   | 0  | 0 | 0  |
| 0 | 0  | 41  | 0   | 0  | 0 | 0  |
| 0 | 0  | 57  | 0   | 12 | 0 | 0  |
| 0 | 0  | 19  | 0   | 0  | 0 | 0  |
| 0 | 0  | 120 | 0   | 0  | 0 | 0  |
| 0 | 0  | 14  | 0   | 0  | 0 | 0  |
| 0 | 0  | 16  | 0   | 0  | 0 | 0  |
| 0 | 0  | 13  | 0   | 0  | 0 | 10 |
| 0 | 0  | 165 | 88  | 15 | 0 | 39 |
| 0 | 0  | 12  | 0   | 0  | 0 | 0  |
| 0 | 0  | 17  | 0   | 0  | 0 | 0  |
| 0 | 0  | 24  | 0   | 0  | 0 | 23 |
| 0 | 0  | 0   | 0   | 0  | 0 | 11 |
| 0 | 0  | 0   | 31  | 0  | 0 | 0  |
| 0 | 0  | 0   | 0   | 0  | 0 | 0  |



[illegible]



|    |    |   |     |     |   |    |
|----|----|---|-----|-----|---|----|
| 0  | 0  | 0 | 0   | 0   | 0 | 0  |
| 0  | 0  | 0 | 0   | 12  | 0 | 34 |
| 0  | 0  | 0 | 0   | 0   | 0 | 0  |
| 13 | 0  | 0 | 0   | 0   | 0 | 0  |
| 0  | 0  | 0 | 0   | 0   | 0 | 0  |
| 0  | 0  | 0 | 0   | 0   | 0 | 10 |
| 0  | 0  | 0 | 0   | 0   | 0 | 0  |
| 0  | 24 | 0 | 0   | 141 | 0 | 0  |
| 0  | 0  | 0 | 0   | 0   | 0 | 0  |
| 0  | 0  | 0 | 0   | 0   | 0 | 0  |
| 0  | 0  | 0 | 0   | 0   | 0 | 0  |
| 0  | 0  | 0 | 0   | 0   | 0 | 0  |
| 51 | 0  | 0 | 0   | 0   | 0 | 0  |
| 29 | 0  | 0 | 0   | 0   | 0 | 0  |
| 0  | 0  | 0 | 0   | 13  | 0 | 0  |
| 0  | 0  | 0 | 0   | 0   | 0 | 0  |
| 0  | 0  | 0 | 0   | 0   | 0 | 0  |
| 11 | 45 | 0 | 62  | 215 | 0 | 0  |
| 0  | 0  | 0 | 0   | 0   | 0 | 0  |
| 10 | 0  | 0 | 0   | 0   | 0 | 0  |
| 0  | 0  | 0 | 0   | 0   | 0 | 0  |
| 0  | 0  | 0 | 13  | 0   | 0 | 0  |
| 0  | 0  | 0 | 0   | 0   | 0 | 0  |
| 0  | 21 | 0 | 0   | 36  | 0 | 0  |
| 0  | 0  | 0 | 0   | 0   | 0 | 0  |
| 0  | 0  | 0 | 0   | 0   | 0 | 0  |
| 0  | 0  | 0 | 0   | 0   | 0 | 0  |
| 0  | 0  | 0 | 0   | 0   | 0 | 31 |
| 0  | 0  | 0 | 0   | 0   | 0 | 0  |
| 24 | 0  | 0 | 56  | 29  | 0 | 74 |
| 0  | 0  | 0 | 0   | 0   | 0 | 0  |
| 0  | 0  | 0 | 0   | 0   | 0 | 0  |
| 34 | 0  | 0 | 0   | 0   | 0 | 0  |
| 0  | 0  | 0 | 325 | 28  | 0 | 0  |
| 0  | 0  | 0 | 167 | 28  | 0 | 0  |
| 0  | 0  | 0 | 0   | 0   | 0 | 0  |
| 0  | 0  | 0 | 0   | 0   | 0 | 0  |
| 0  | 27 | 0 | 0   | 455 | 0 | 0  |
| 0  | 0  | 0 | 0   | 0   | 0 | 0  |
| 15 | 72 | 0 | 0   | 219 | 0 | 0  |
| 0  | 0  | 0 | 0   | 0   | 0 | 0  |
| 0  | 0  | 0 | 0   | 0   | 0 | 0  |
| 0  | 0  | 0 | 0   | 0   | 0 | 0  |
| 12 | 0  | 0 | 0   | 0   | 0 | 0  |
| 29 | 0  | 0 | 0   | 0   | 0 | 0  |
| 84 | 0  | 0 | 0   | 0   | 0 | 0  |

|      |    |   |    |     |   |    |
|------|----|---|----|-----|---|----|
| 42   | 0  | 0 | 0  | 0   | 0 | 0  |
| 53   | 0  | 0 | 0  | 11  | 0 | 0  |
| 0    | 0  | 0 | 0  | 0   | 0 | 0  |
| 0    | 0  | 0 | 0  | 0   | 0 | 0  |
| 0    | 0  | 0 | 13 | 11  | 0 | 16 |
| 0    | 10 | 0 | 0  | 0   | 0 | 0  |
| 0    | 0  | 0 | 0  | 0   | 0 | 0  |
| 0    | 0  | 0 | 0  | 0   | 0 | 0  |
| 0    | 0  | 0 | 0  | 0   | 0 | 0  |
| 0    | 0  | 0 | 0  | 0   | 0 | 0  |
| 145  | 0  | 0 | 0  | 0   | 0 | 0  |
| 14   | 0  | 0 | 0  | 0   | 0 | 0  |
| 0    | 0  | 0 | 0  | 0   | 0 | 0  |
| 418  | 0  | 0 | 0  | 0   | 0 | 0  |
| 1266 | 0  | 0 | 0  | 0   | 0 | 0  |
| 0    | 0  | 0 | 0  | 0   | 0 | 0  |
| 0    | 0  | 0 | 0  | 0   | 0 | 0  |
| 11   | 0  | 0 | 0  | 0   | 0 | 0  |
| 0    | 0  | 0 | 0  | 0   | 0 | 0  |
| 0    | 0  | 0 | 0  | 0   | 0 | 0  |
| 0    | 0  | 0 | 0  | 0   | 0 | 0  |
| 0    | 0  | 0 | 0  | 173 | 0 | 12 |
| 0    | 0  | 0 | 0  | 0   | 0 | 0  |
| 0    | 0  | 0 | 0  | 0   | 0 | 0  |
| 0    | 0  | 0 | 0  | 0   | 0 | 0  |
| 10   | 0  | 0 | 0  | 0   | 0 | 0  |
| 0    | 10 | 0 | 0  | 27  | 0 | 0  |
| 0    | 0  | 0 | 0  | 800 | 0 | 0  |
| 0    | 0  | 0 | 0  | 0   | 0 | 0  |
| 0    | 0  | 0 | 0  | 0   | 0 | 0  |
| 0    | 0  | 0 | 0  | 0   | 0 | 0  |
| 11   | 0  | 0 | 0  | 0   | 0 | 0  |
| 0    | 0  | 0 | 0  | 0   | 0 | 0  |
| 0    | 0  | 0 | 0  | 0   | 0 | 0  |
| 0    | 0  | 0 | 0  | 0   | 0 | 0  |
| 0    | 0  | 0 | 0  | 0   | 0 | 0  |
| 0    | 0  | 0 | 0  | 0   | 0 | 0  |
| 28   | 11 | 0 | 0  | 0   | 0 | 0  |
| 0    | 0  | 0 | 0  | 0   | 0 | 0  |
| 0    | 0  | 0 | 0  | 0   | 0 | 0  |
| 0    | 0  | 0 | 0  | 0   | 0 | 0  |
| 0    | 0  | 0 | 0  | 0   | 0 | 0  |
| 0    | 0  | 0 | 0  | 0   | 0 | 0  |
| 0    | 0  | 0 | 0  | 0   | 0 | 0  |
| 22   | 0  | 0 | 0  | 0   | 0 | 0  |
| 0    | 0  | 0 | 0  | 0   | 0 | 0  |
| 0    | 0  | 0 | 0  | 0   | 0 | 0  |

|     |    |   |     |    |   |    |
|-----|----|---|-----|----|---|----|
| 0   | 0  | 0 | 0   | 0  | 0 | 0  |
| 27  | 0  | 0 | 0   | 0  | 0 | 0  |
| 0   | 0  | 0 | 0   | 0  | 0 | 0  |
| 68  | 0  | 0 | 0   | 0  | 0 | 0  |
| 0   | 0  | 0 | 0   | 0  | 0 | 0  |
| 0   | 0  | 0 | 0   | 0  | 0 | 0  |
| 0   | 0  | 0 | 0   | 0  | 0 | 0  |
| 0   | 0  | 0 | 0   | 0  | 0 | 0  |
| 0   | 0  | 0 | 0   | 0  | 0 | 0  |
| 0   | 0  | 0 | 0   | 0  | 0 | 0  |
| 125 | 0  | 0 | 0   | 0  | 0 | 0  |
| 12  | 0  | 0 | 0   | 0  | 0 | 0  |
| 0   | 0  | 0 | 0   | 0  | 0 | 0  |
| 0   | 0  | 0 | 0   | 0  | 0 | 11 |
| 0   | 0  | 0 | 0   | 0  | 0 | 0  |
| 0   | 0  | 0 | 20  | 0  | 0 | 0  |
| 0   | 0  | 0 | 0   | 0  | 0 | 0  |
| 0   | 0  | 0 | 0   | 0  | 0 | 0  |
| 0   | 0  | 0 | 152 | 0  | 0 | 0  |
| 0   | 0  | 0 | 0   | 0  | 0 | 23 |
| 0   | 0  | 0 | 0   | 0  | 0 | 0  |
| 0   | 0  | 0 | 0   | 0  | 0 | 0  |
| 0   | 0  | 0 | 32  | 0  | 0 | 0  |
| 0   | 0  | 0 | 0   | 0  | 0 | 15 |
| 0   | 0  | 0 | 186 | 0  | 0 | 0  |
| 0   | 10 | 0 | 0   | 0  | 0 | 0  |
| 0   | 11 | 0 | 0   | 0  | 0 | 0  |
| 0   | 16 | 0 | 0   | 0  | 0 | 0  |
| 0   | 28 | 0 | 0   | 11 | 0 | 0  |
| 0   | 12 | 0 | 0   | 0  | 0 | 0  |
| 0   | 28 | 0 | 0   | 0  | 0 | 0  |
| 0   | 13 | 0 | 0   | 0  | 0 | 0  |
| 0   | 24 | 0 | 0   | 0  | 0 | 0  |
| 0   | 15 | 0 | 0   | 0  | 0 | 0  |
| 0   | 16 | 0 | 0   | 0  | 0 | 0  |
| 0   | 11 | 0 | 0   | 0  | 0 | 11 |
| 0   | 23 | 0 | 0   | 0  | 0 | 0  |
| 0   | 11 | 0 | 0   | 91 | 0 | 0  |
| 0   | 14 | 0 | 86  | 0  | 0 | 0  |
| 0   | 11 | 0 | 0   | 0  | 0 | 0  |
| 0   | 10 | 0 | 0   | 28 | 0 | 0  |
| 0   | 13 | 0 | 0   | 0  | 0 | 0  |
| 0   | 44 | 0 | 0   | 0  | 0 | 0  |
| 0   | 16 | 0 | 0   | 0  | 0 | 0  |
| 0   | 11 | 0 | 0   | 0  | 0 | 0  |
| 0   | 15 | 0 | 0   | 0  | 0 | 0  |





[illegible]



|    |   |   |    |     |   |    |
|----|---|---|----|-----|---|----|
| 0  | 0 | 0 | 0  | 116 | 0 | 0  |
| 0  | 0 | 0 | 0  | 0   | 0 | 0  |
| 0  | 0 | 0 | 0  | 0   | 0 | 0  |
| 11 | 0 | 0 | 0  | 0   | 0 | 0  |
| 0  | 0 | 0 | 0  | 42  | 0 | 0  |
| 0  | 0 | 0 | 0  | 21  | 0 | 10 |
| 0  | 0 | 0 | 0  | 0   | 0 | 0  |
| 0  | 0 | 0 | 0  | 0   | 0 | 0  |
| 0  | 0 | 0 | 0  | 10  | 0 | 0  |
| 0  | 0 | 0 | 0  | 0   | 0 | 0  |
| 0  | 0 | 0 | 0  | 0   | 0 | 0  |
| 0  | 0 | 0 | 0  | 0   | 0 | 0  |
| 0  | 0 | 0 | 0  | 0   | 0 | 0  |
| 14 | 0 | 0 | 0  | 0   | 0 | 0  |
| 17 | 0 | 0 | 0  | 0   | 0 | 0  |
| 0  | 0 | 0 | 0  | 0   | 0 | 0  |
| 0  | 0 | 0 | 0  | 0   | 0 | 0  |
| 0  | 0 | 0 | 0  | 0   | 0 | 0  |
| 0  | 0 | 0 | 0  | 0   | 0 | 0  |
| 0  | 0 | 0 | 0  | 15  | 0 | 0  |
| 0  | 0 | 0 | 0  | 0   | 0 | 0  |
| 0  | 0 | 0 | 0  | 68  | 0 | 0  |
| 0  | 0 | 0 | 0  | 25  | 0 | 0  |
| 0  | 0 | 0 | 0  | 38  | 0 | 0  |
| 0  | 0 | 0 | 0  | 0   | 0 | 0  |
| 0  | 0 | 0 | 0  | 0   | 0 | 0  |
| 0  | 0 | 0 | 0  | 0   | 0 | 0  |
| 0  | 0 | 0 | 0  | 0   | 0 | 0  |
| 0  | 0 | 0 | 0  | 10  | 0 | 0  |
| 0  | 0 | 0 | 0  | 35  | 0 | 11 |
| 0  | 0 | 0 | 0  | 0   | 0 | 0  |
| 0  | 0 | 0 | 0  | 0   | 0 | 0  |
| 0  | 0 | 0 | 0  | 50  | 0 | 0  |
| 0  | 0 | 0 | 11 | 0   | 0 | 0  |
| 0  | 0 | 0 | 94 | 94  | 0 | 0  |
| 0  | 0 | 0 | 0  | 0   | 0 | 0  |
| 0  | 0 | 0 | 0  | 0   | 0 | 0  |
| 0  | 0 | 0 | 0  | 0   | 0 | 0  |
| 0  | 0 | 0 | 0  | 0   | 0 | 0  |
| 0  | 0 | 0 | 0  | 0   | 0 | 0  |
| 0  | 0 | 0 | 0  | 0   | 0 | 42 |
| 0  | 0 | 0 | 0  | 0   | 0 | 0  |
| 0  | 0 | 0 | 0  | 0   | 0 | 0  |
| 0  | 0 | 0 | 11 | 0   | 0 | 0  |
| 0  | 0 | 0 | 0  | 0   | 0 | 0  |
| 0  | 0 | 0 | 0  | 0   | 0 | 0  |















[illegible]



|     |   |   |    |    |   |   |
|-----|---|---|----|----|---|---|
| 60  | 0 | 0 | 0  | 0  | 0 | 0 |
| 367 | 0 | 0 | 0  | 0  | 0 | 0 |
| 21  | 0 | 0 | 0  | 0  | 0 | 0 |
| 11  | 0 | 0 | 0  | 0  | 0 | 0 |
| 12  | 0 | 0 | 0  | 0  | 0 | 0 |
| 118 | 0 | 0 | 0  | 0  | 0 | 0 |
| 0   | 0 | 0 | 0  | 0  | 0 | 0 |
| 0   | 0 | 0 | 0  | 0  | 0 | 0 |
| 0   | 0 | 0 | 0  | 0  | 0 | 0 |
| 0   | 0 | 0 | 53 | 0  | 0 | 0 |
| 0   | 0 | 0 | 0  | 0  | 0 | 0 |
| 0   | 0 | 0 | 0  | 11 | 0 | 0 |
| 0   | 0 | 0 | 0  | 11 | 0 | 0 |
| 0   | 0 | 0 | 0  | 0  | 0 | 0 |
| 0   | 0 | 0 | 0  | 0  | 0 | 0 |
| 0   | 0 | 0 | 0  | 0  | 0 | 0 |
| 0   | 0 | 0 | 0  | 0  | 0 | 0 |
| 0   | 0 | 0 | 0  | 11 | 0 | 0 |
| 0   | 0 | 0 | 0  | 0  | 0 | 0 |
| 0   | 0 | 0 | 0  | 0  | 0 | 0 |
| 0   | 0 | 0 | 0  | 0  | 0 | 0 |
| 0   | 0 | 0 | 0  | 0  | 0 | 0 |
| 0   | 0 | 0 | 0  | 0  | 0 | 0 |
| 0   | 0 | 0 | 0  | 0  | 0 | 0 |
| 0   | 0 | 0 | 0  | 0  | 0 | 0 |
| 0   | 0 | 0 | 0  | 11 | 0 | 0 |
| 0   | 0 | 0 | 0  | 14 | 0 | 0 |
| 0   | 0 | 0 | 0  | 0  | 0 | 0 |
| 0   | 0 | 0 | 0  | 0  | 0 | 0 |
| 0   | 0 | 0 | 0  | 0  | 0 | 0 |
| 0   | 0 | 0 | 0  | 0  | 0 | 0 |
| 0   | 0 | 0 | 0  | 0  | 0 | 0 |
| 0   | 0 | 0 | 0  | 10 | 0 | 0 |
| 0   | 0 | 0 | 0  | 0  | 0 | 0 |
| 0   | 0 | 0 | 0  | 11 | 0 | 0 |
| 0   | 0 | 0 | 0  | 0  | 0 | 0 |
| 0   | 0 | 0 | 0  | 0  | 0 | 0 |
| 0   | 0 | 0 | 0  | 0  | 0 | 0 |
| 0   | 0 | 0 | 0  | 0  | 0 | 0 |
| 0   | 0 | 0 | 0  | 42 | 0 | 0 |
| 0   | 0 | 0 | 0  | 0  | 0 | 0 |
| 0   | 0 | 0 | 0  | 0  | 0 | 0 |
| 0   | 0 | 0 | 0  | 0  | 0 | 0 |
| 0   | 0 | 0 | 0  | 0  | 0 | 0 |
| 0   | 0 | 0 | 0  | 0  | 0 | 0 |
| 0   | 0 | 0 | 0  | 0  | 0 | 0 |
| 0   | 0 | 0 | 0  | 0  | 0 | 0 |
| 0   | 0 | 0 | 0  | 0  | 0 | 0 |
| 0   | 0 | 0 | 0  | 38 | 0 | 0 |
| 0   | 0 | 0 | 0  | 0  | 0 | 0 |
| 0   | 0 | 0 | 0  | 0  | 0 | 0 |
| 0   | 0 | 0 | 0  | 0  | 0 | 0 |
| 0   | 0 | 0 | 0  | 0  | 0 | 0 |

[illegible]













**regnant Horn**

| <b>PH_307</b> | <b>PH_324</b> | <b>PH_329</b> | <b>PH_331</b> | <b>PH_332</b> | <b>PH_333</b> | <b>PH_340</b> |
|---------------|---------------|---------------|---------------|---------------|---------------|---------------|
| 0             | 0             | 0             | 0             | 0             | 160           | 0             |
| 0             | 0             | 0             | 0             | 0             | 13            | 0             |
| 188           | 26            | 92            | 0             | 0             | 59            | 48            |
| 62            | 0             | 102           | 17            | 0             | 111           | 11            |
| 50            | 0             | 19            | 0             | 0             | 11            | 0             |
| 23            | 0             | 0             | 0             | 0             | 12            | 14            |
| 53            | 0             | 32            | 16            | 0             | 13            | 0             |
| 33            | 0             | 0             | 0             | 0             | 0             | 0             |
| 423           | 0             | 67            | 0             | 0             | 54            | 0             |
| 617           | 11            | 315           | 0             | 0             | 249           | 197           |
| 381           | 0             | 36            | 0             | 0             | 0             | 31            |
| 0             | 0             | 0             | 0             | 0             | 0             | 20            |
| 88            | 0             | 17            | 0             | 0             | 11            | 0             |
| 61            | 0             | 21            | 0             | 10            | 0             | 0             |
| 96            | 0             | 68            | 0             | 10            | 0             | 25            |
| 143           | 0             | 34            | 0             | 0             | 13            | 31            |
| 1796          | 1605          | 1188          | 216           | 245           | 1082          | 545           |
| 1160          | 77            | 355           | 28            | 65            | 11            | 41            |
| 13            | 42            | 0             | 0             | 0             | 11            | 0             |
| 55            | 31            | 161           | 11            | 0             | 81            | 148           |
| 0             | 0             | 0             | 0             | 0             | 40            | 0             |
| 32            | 0             | 0             | 0             | 0             | 34            | 0             |
| 19            | 0             | 0             | 0             | 0             | 11            | 13            |
| 0             | 0             | 0             | 0             | 0             | 0             | 0             |
| 1582          | 484           | 1029          | 214           | 160           | 1868          | 1381          |
| 655           | 240           | 162           | 0             | 11            | 413           | 266           |
| 276           | 1315          | 480           | 12            | 0             | 164           | 237           |
| 86            | 121           | 169           | 0             | 0             | 204           | 159           |
| 310           | 252           | 460           | 0             | 12            | 626           | 464           |
| 110           | 0             | 11            | 0             | 0             | 57            | 12            |
| 174           | 0             | 36            | 0             | 0             | 60            | 14            |
| 64            | 46            | 0             | 0             | 0             | 77            | 183           |
| 1343          | 5683          | 373           | 79            | 140           | 944           | 971           |
| 0             | 0             | 0             | 0             | 0             | 0             | 0             |
| 0             | 0             | 37            | 0             | 0             | 64            | 0             |
| 0             | 0             | 0             | 0             | 0             | 0             | 0             |
| 39            | 0             | 16            | 0             | 0             | 26            | 0             |
| 686           | 157           | 3928          | 41            | 58            | 632           | 200           |
| 6235          | 117           | 478           | 19            | 266           | 0             | 133           |
| 39351         | 3305          | 9698          | 344           | 284           | 1170          | 999           |
| 263           | 357           | 29            | 0             | 0             | 75            | 0             |

|       |     |      |     |     |      |      |
|-------|-----|------|-----|-----|------|------|
| 191   | 464 | 0    | 0   | 0   | 60   | 16   |
| 485   | 179 | 493  | 0   | 41  | 52   | 55   |
| 366   | 193 | 335  | 0   | 43  | 65   | 16   |
| 38334 | 678 | 5800 | 821 | 638 | 287  | 2013 |
| 854   | 214 | 1129 | 197 | 176 | 37   | 43   |
| 547   | 0   | 146  | 0   | 0   | 0    | 55   |
| 354   | 0   | 664  | 0   | 37  | 0    | 57   |
| 275   | 0   | 226  | 0   | 0   | 0    | 61   |
| 225   | 0   | 10   | 0   | 0   | 0    | 0    |
| 0     | 0   | 85   | 0   | 0   | 0    | 0    |
| 0     | 0   | 0    | 0   | 0   | 0    | 0    |
| 276   | 0   | 11   | 0   | 0   | 0    | 0    |
| 1101  | 0   | 147  | 0   | 18  | 50   | 284  |
| 32    | 0   | 33   | 0   | 0   | 0    | 0    |
| 43    | 0   | 0    | 0   | 0   | 0    | 0    |
| 0     | 0   | 251  | 0   | 0   | 0    | 77   |
| 274   | 0   | 23   | 0   | 0   | 0    | 27   |
| 2431  | 199 | 799  | 112 | 99  | 1086 | 537  |
| 1998  | 71  | 532  | 181 | 103 | 26   | 133  |
| 12    | 0   | 0    | 0   | 0   | 122  | 12   |
| 354   | 0   | 83   | 11  | 0   | 0    | 0    |
| 0     | 0   | 0    | 0   | 0   | 0    | 0    |
| 0     | 0   | 0    | 0   | 0   | 0    | 0    |
| 110   | 31  | 0    | 0   | 18  | 44   | 0    |
| 81    | 0   | 0    | 0   | 0   | 0    | 0    |
| 229   | 0   | 67   | 0   | 0   | 0    | 28   |
| 165   | 0   | 85   | 0   | 0   | 0    | 0    |
| 75    | 0   | 11   | 0   | 0   | 10   | 0    |
| 33    | 0   | 0    | 0   | 0   | 0    | 0    |
| 33    | 0   | 0    | 0   | 0   | 178  | 43   |
| 3203  | 133 | 904  | 0   | 0   | 0    | 446  |
| 5741  | 535 | 3195 | 306 | 280 | 573  | 1624 |
| 0     | 0   | 12   | 0   | 0   | 34   | 29   |
| 253   | 15  | 277  | 0   | 0   | 0    | 36   |
| 0     | 0   | 61   | 0   | 0   | 0    | 0    |
| 113   | 0   | 207  | 0   | 0   | 0    | 28   |
| 395   | 12  | 426  | 0   | 0   | 0    | 11   |
| 260   | 0   | 218  | 0   | 0   | 0    | 0    |
| 118   | 12  | 47   | 0   | 0   | 16   | 0    |
| 909   | 0   | 25   | 0   | 0   | 0    | 0    |
| 4162  | 13  | 574  | 0   | 28  | 0    | 212  |
| 40    | 25  | 37   | 0   | 10  | 33   | 31   |
| 46    | 0   | 186  | 0   | 0   | 0    | 0    |
| 37    | 0   | 92   | 0   | 0   | 0    | 0    |
| 857   | 103 | 371  | 0   | 0   | 0    | 160  |
| 14273 | 278 | 2933 | 120 | 271 | 293  | 2344 |

|       |      |      |     |      |       |      |
|-------|------|------|-----|------|-------|------|
| 219   | 0    | 462  | 0   | 0    | 0     | 11   |
| 982   | 58   | 294  | 91  | 108  | 89    | 116  |
| 448   | 23   | 120  | 0   | 0    | 0     | 353  |
| 789   | 0    | 18   | 0   | 0    | 0     | 0    |
| 2836  | 423  | 2291 | 41  | 93   | 163   | 2957 |
| 12    | 0    | 0    | 0   | 0    | 92    | 10   |
| 0     | 0    | 0    | 0   | 0    | 0     | 0    |
| 22    | 0    | 0    | 0   | 0    | 0     | 0    |
| 0     | 0    | 30   | 0   | 0    | 0     | 0    |
| 17    | 0    | 13   | 0   | 0    | 0     | 0    |
| 39    | 0    | 44   | 78  | 0    | 141   | 48   |
| 119   | 10   | 30   | 0   | 12   | 0     | 0    |
| 5264  | 1228 | 3306 | 439 | 467  | 12122 | 4036 |
| 0     | 40   | 0    | 0   | 0    | 44    | 0    |
| 634   | 136  | 1233 | 66  | 33   | 2138  | 680  |
| 373   | 15   | 300  | 0   | 0    | 0     | 40   |
| 57    | 49   | 147  | 0   | 0    | 56    | 146  |
| 267   | 0    | 682  | 0   | 0    | 0     | 111  |
| 0     | 0    | 11   | 0   | 0    | 155   | 46   |
| 193   | 0    | 254  | 0   | 0    | 0     | 33   |
| 35    | 0    | 10   | 0   | 0    | 0     | 0    |
| 32    | 0    | 32   | 0   | 0    | 0     | 11   |
| 49    | 0    | 0    | 10  | 0    | 0     | 0    |
| 142   | 47   | 31   | 0   | 0    | 337   | 72   |
| 384   | 82   | 118  | 0   | 26   | 443   | 115  |
| 222   | 76   | 100  | 10  | 0    | 588   | 164  |
| 156   | 23   | 96   | 0   | 0    | 365   | 105  |
| 68    | 0    | 12   | 0   | 0    | 22    | 0    |
| 41    | 86   | 404  | 0   | 0    | 66    | 10   |
| 617   | 190  | 1871 | 88  | 0    | 1860  | 603  |
| 10    | 0    | 46   | 0   | 0    | 119   | 61   |
| 0     | 0    | 0    | 0   | 0    | 54    | 0    |
| 0     | 0    | 146  | 0   | 10   | 35    | 31   |
| 20    | 0    | 125  | 0   | 0    | 288   | 31   |
| 0     | 0    | 22   | 0   | 0    | 0     | 0    |
| 0     | 0    | 0    | 0   | 0    | 52    | 10   |
| 26    | 0    | 0    | 0   | 0    | 114   | 23   |
| 70    | 32   | 112  | 0   | 0    | 285   | 45   |
| 33    | 0    | 61   | 0   | 0    | 23    | 0    |
| 470   | 104  | 216  | 39  | 29   | 1563  | 259  |
| 31    | 13   | 0    | 0   | 0    | 84    | 0    |
| 31    | 0    | 0    | 0   | 0    | 143   | 28   |
| 1464  | 51   | 161  | 0   | 10   | 25    | 83   |
| 11135 | 2704 | 7586 | 464 | 1912 | 3063  | 2434 |
| 694   | 166  | 391  | 0   | 66   | 52    | 30   |
| 3852  | 2105 | 3327 | 11  | 411  | 474   | 199  |

|      |      |     |     |     |      |      |
|------|------|-----|-----|-----|------|------|
| 0    | 0    | 0   | 0   | 0   | 54   | 0    |
| 148  | 33   | 35  | 0   | 0   | 676  | 635  |
| 408  | 63   | 93  | 21  | 0   | 843  | 649  |
| 8000 | 1570 | 828 | 323 | 223 | 1037 | 880  |
| 465  | 0    | 45  | 0   | 0   | 0    | 13   |
| 1510 | 110  | 111 | 14  | 32  | 125  | 194  |
| 0    | 0    | 0   | 0   | 0   | 0    | 0    |
| 592  | 36   | 46  | 0   | 0   | 0    | 12   |
| 34   | 0    | 38  | 0   | 0   | 0    | 0    |
| 0    | 0    | 0   | 0   | 0   | 0    | 0    |
| 213  | 0    | 69  | 0   | 0   | 127  | 88   |
| 56   | 0    | 33  | 0   | 20  | 200  | 37   |
| 144  | 0    | 104 | 0   | 0   | 0    | 0    |
| 82   | 0    | 0   | 0   | 0   | 86   | 233  |
| 316  | 49   | 42  | 0   | 0   | 473  | 1181 |
| 172  | 0    | 0   | 0   | 0   | 0    | 0    |
| 186  | 0    | 53  | 0   | 0   | 13   | 45   |
| 0    | 0    | 0   | 0   | 0   | 0    | 0    |
| 0    | 0    | 0   | 0   | 0   | 0    | 0    |
| 10   | 0    | 0   | 0   | 0   | 0    | 0    |
| 136  | 23   | 112 | 0   | 0   | 166  | 24   |
| 36   | 0    | 0   | 0   | 0   | 0    | 0    |
| 139  | 10   | 49  | 0   | 18  | 623  | 216  |
| 0    | 0    | 0   | 13  | 0   | 41   | 31   |
| 0    | 0    | 0   | 0   | 0   | 100  | 10   |
| 167  | 36   | 175 | 30  | 0   | 43   | 189  |
| 169  | 85   | 82  | 0   | 0   | 209  | 106  |
| 306  | 193  | 244 | 0   | 70  | 559  | 1008 |
| 18   | 0    | 61  | 0   | 0   | 92   | 36   |
| 69   | 39   | 96  | 0   | 0   | 47   | 120  |
| 46   | 0    | 11  | 0   | 0   | 0    | 0    |
| 84   | 116  | 94  | 0   | 12  | 137  | 190  |
| 249  | 33   | 82  | 12  | 13  | 128  | 167  |
| 0    | 0    | 46  | 0   | 0   | 75   | 11   |
| 170  | 96   | 30  | 24  | 15  | 123  | 1042 |
| 147  | 25   | 469 | 0   | 0   | 59   | 92   |
| 164  | 19   | 288 | 0   | 0   | 0    | 63   |
| 0    | 0    | 0   | 0   | 0   | 0    | 0    |
| 30   | 13   | 40  | 0   | 0   | 0    | 0    |
| 0    | 0    | 0   | 0   | 0   | 0    | 0    |
| 175  | 0    | 14  | 42  | 0   | 1248 | 0    |
| 10   | 0    | 0   | 0   | 0   | 0    | 0    |
| 14   | 0    | 111 | 0   | 0   | 0    | 14   |
| 0    | 0    | 0   | 0   | 0   | 0    | 0    |
| 161  | 0    | 12  | 23  | 0   | 159  | 29   |
| 66   | 0    | 0   | 44  | 0   | 69   | 0    |

|      |      |      |    |     |      |      |
|------|------|------|----|-----|------|------|
| 91   | 0    | 0    | 0  | 0   | 23   | 0    |
| 169  | 0    | 33   | 0  | 189 | 114  | 0    |
| 1036 | 61   | 327  | 35 | 426 | 656  | 768  |
| 260  | 0    | 0    | 10 | 117 | 936  | 29   |
| 77   | 0    | 116  | 0  | 0   | 0    | 84   |
| 199  | 50   | 303  | 12 | 0   | 251  | 204  |
| 408  | 14   | 130  | 30 | 15  | 322  | 102  |
| 0    | 0    | 0    | 0  | 0   | 0    | 0    |
| 51   | 0    | 27   | 0  | 0   | 0    | 0    |
| 0    | 0    | 0    | 0  | 0   | 0    | 0    |
| 60   | 0    | 10   | 0  | 0   | 0    | 0    |
| 12   | 0    | 11   | 0  | 0   | 0    | 0    |
| 0    | 0    | 0    | 0  | 0   | 10   | 0    |
| 1307 | 163  | 1001 | 91 | 155 | 288  | 364  |
| 10   | 0    | 63   | 0  | 0   | 0    | 0    |
| 85   | 49   | 769  | 0  | 36  | 48   | 555  |
| 32   | 0    | 0    | 0  | 0   | 0    | 11   |
| 29   | 0    | 0    | 0  | 0   | 24   | 0    |
| 0    | 0    | 0    | 0  | 0   | 0    | 0    |
| 0    | 0    | 0    | 0  | 0   | 0    | 0    |
| 27   | 0    | 0    | 0  | 0   | 0    | 0    |
| 317  | 0    | 90   | 21 | 0   | 510  | 10   |
| 133  | 0    | 90   | 0  | 0   | 0    | 0    |
| 0    | 0    | 0    | 0  | 0   | 0    | 0    |
| 0    | 0    | 89   | 0  | 0   | 0    | 0    |
| 175  | 0    | 55   | 0  | 0   | 27   | 0    |
| 188  | 59   | 243  | 0  | 0   | 22   | 30   |
| 0    | 0    | 0    | 0  | 0   | 0    | 0    |
| 0    | 0    | 0    | 0  | 0   | 0    | 0    |
| 0    | 0    | 0    | 0  | 0   | 0    | 0    |
| 0    | 0    | 0    | 0  | 0   | 0    | 0    |
| 0    | 0    | 61   | 0  | 0   | 0    | 0    |
| 10   | 0    | 14   | 0  | 0   | 0    | 0    |
| 0    | 0    | 0    | 0  | 0   | 0    | 0    |
| 24   | 0    | 0    | 0  | 0   | 12   | 0    |
| 86   | 217  | 40   | 0  | 0   | 130  | 270  |
| 3870 | 2439 | 6472 | 24 | 27  | 4997 | 2772 |
| 1286 | 1995 | 4016 | 0  | 81  | 2101 | 1028 |
| 123  | 0    | 139  | 0  | 0   | 283  | 10   |
| 0    | 0    | 26   | 0  | 0   | 11   | 0    |
| 0    | 0    | 0    | 0  | 0   | 0    | 0    |
| 3542 | 198  | 4553 | 55 | 27  | 288  | 222  |
| 425  | 24   | 760  | 15 | 0   | 442  | 132  |
| 46   | 0    | 149  | 0  | 0   | 65   | 0    |
| 56   | 0    | 621  | 0  | 0   | 0    | 0    |
| 548  | 32   | 6160 | 68 | 14  | 35   | 196  |



|      |      |      |     |    |      |      |
|------|------|------|-----|----|------|------|
| 710  | 0    | 1719 | 38  | 0  | 0    | 70   |
| 1582 | 60   | 2665 | 61  | 0  | 38   | 233  |
| 212  | 20   | 195  | 0   | 0  | 11   | 91   |
| 0    | 0    | 0    | 0   | 0  | 135  | 11   |
| 64   | 0    | 168  | 0   | 0  | 298  | 52   |
| 1365 | 1909 | 2904 | 14  | 93 | 1761 | 940  |
| 402  | 47   | 1056 | 13  | 0  | 372  | 15   |
| 104  | 85   | 25   | 0   | 0  | 75   | 48   |
| 135  | 64   | 48   | 12  | 0  | 0    | 10   |
| 0    | 0    | 0    | 0   | 0  | 0    | 0    |
| 39   | 0    | 667  | 0   | 0  | 0    | 28   |
| 77   | 16   | 0    | 0   | 0  | 0    | 0    |
| 73   | 0    | 0    | 0   | 0  | 0    | 0    |
| 436  | 121  | 1880 | 0   | 0  | 1095 | 126  |
| 331  | 107  | 78   | 119 | 0  | 0    | 35   |
| 0    | 0    | 38   | 0   | 0  | 0    | 0    |
| 0    | 0    | 130  | 0   | 0  | 0    | 0    |
| 44   | 0    | 441  | 0   | 0  | 0    | 0    |
| 715  | 561  | 1258 | 46  | 14 | 247  | 316  |
| 59   | 0    | 23   | 0   | 0  | 0    | 0    |
| 0    | 0    | 0    | 0   | 0  | 165  | 0    |
| 0    | 0    | 0    | 0   | 0  | 104  | 0    |
| 45   | 117  | 10   | 0   | 0  | 112  | 125  |
| 0    | 0    | 12   | 0   | 0  | 68   | 0    |
| 617  | 1617 | 2576 | 92  | 26 | 1495 | 995  |
| 285  | 46   | 563  | 0   | 0  | 145  | 11   |
| 37   | 0    | 91   | 0   | 0  | 0    | 0    |
| 1946 | 60   | 2687 | 0   | 11 | 520  | 214  |
| 229  | 32   | 311  | 0   | 0  | 576  | 49   |
| 133  | 10   | 53   | 0   | 0  | 288  | 39   |
| 363  | 0    | 906  | 0   | 0  | 0    | 0    |
| 96   | 0    | 73   | 0   | 0  | 338  | 48   |
| 10   | 0    | 35   | 0   | 0  | 0    | 0    |
| 0    | 67   | 0    | 0   | 0  | 79   | 0    |
| 1024 | 526  | 2021 | 39  | 40 | 154  | 239  |
| 156  | 161  | 190  | 0   | 0  | 48   | 12   |
| 102  | 38   | 118  | 0   | 0  | 43   | 0    |
| 10   | 0    | 0    | 0   | 0  | 65   | 0    |
| 0    | 0    | 0    | 0   | 0  | 0    | 0    |
| 256  | 0    | 445  | 10  | 0  | 446  | 147  |
| 47   | 0    | 28   | 0   | 0  | 290  | 73   |
| 272  | 0    | 97   | 10  | 0  | 109  | 48   |
| 98   | 0    | 20   | 0   | 0  | 0    | 0    |
| 1004 | 51   | 609  | 60  | 33 | 859  | 180  |
| 0    | 0    | 0    | 0   | 0  | 0    | 0    |
| 2138 | 285  | 294  | 11  | 75 | 1942 | 2444 |

|       |       |      |      |      |      |      |
|-------|-------|------|------|------|------|------|
| 5017  | 554   | 867  | 33   | 102  | 7026 | 2171 |
| 15    | 0     | 0    | 0    | 0    | 181  | 51   |
| 35    | 0     | 0    | 0    | 0    | 458  | 206  |
| 1646  | 1347  | 1336 | 39   | 94   | 1158 | 2663 |
| 280   | 47    | 65   | 23   | 0    | 85   | 112  |
| 145   | 50    | 10   | 0    | 0    | 185  | 11   |
| 28    | 128   | 16   | 0    | 0    | 159  | 90   |
| 526   | 21    | 68   | 13   | 34   | 1340 | 389  |
| 71    | 0     | 0    | 0    | 0    | 174  | 42   |
| 0     | 0     | 0    | 0    | 0    | 57   | 0    |
| 0     | 0     | 0    | 0    | 0    | 327  | 0    |
| 332   | 272   | 193  | 0    | 11   | 425  | 116  |
| 10499 | 729   | 1633 | 11   | 300  | 4597 | 907  |
| 173   | 199   | 95   | 0    | 0    | 722  | 46   |
| 159   | 77    | 35   | 0    | 16   | 180  | 37   |
| 338   | 421   | 256  | 27   | 116  | 298  | 70   |
| 781   | 732   | 403  | 45   | 245  | 1230 | 287  |
| 3239  | 12    | 378  | 15   | 74   | 0    | 13   |
| 862   | 0     | 143  | 12   | 39   | 37   | 36   |
| 2440  | 31    | 700  | 0    | 137  | 41   | 79   |
| 2689  | 0     | 223  | 14   | 80   | 27   | 12   |
| 348   | 255   | 222  | 0    | 11   | 45   | 64   |
| 949   | 970   | 728  | 62   | 69   | 261  | 337  |
| 543   | 162   | 381  | 44   | 51   | 56   | 123  |
| 583   | 265   | 294  | 0    | 17   | 52   | 53   |
| 128   | 38    | 0    | 0    | 0    | 202  | 79   |
| 12368 | 23936 | 5263 | 2194 | 1219 | 2250 | 2188 |
| 1265  | 2075  | 2018 | 353  | 187  | 176  | 330  |
| 427   | 800   | 302  | 26   | 26   | 63   | 49   |
| 102   | 119   | 10   | 105  | 0    | 127  | 107  |
| 2451  | 1074  | 195  | 50   | 295  | 3327 | 344  |
| 1214  | 3708  | 865  | 521  | 64   | 99   | 312  |
| 1919  | 4642  | 773  | 184  | 162  | 27   | 95   |
| 115   | 0     | 0    | 0    | 0    | 133  | 29   |
| 256   | 961   | 101  | 222  | 0    | 109  | 367  |
| 329   | 42    | 41   | 0    | 0    | 435  | 162  |
| 51    | 0     | 0    | 0    | 0    | 73   | 46   |
| 1338  | 3147  | 867  | 94   | 142  | 441  | 422  |
| 646   | 178   | 245  | 42   | 59   | 444  | 256  |
| 328   | 545   | 191  | 43   | 23   | 683  | 401  |
| 895   | 70    | 125  | 12   | 0    | 1799 | 1371 |
| 1469  | 146   | 262  | 12   | 0    | 1929 | 1100 |
| 156   | 0     | 127  | 0    | 0    | 0    | 29   |
| 259   | 459   | 244  | 0    | 26   | 97   | 60   |
| 330   | 0     | 117  | 23   | 0    | 532  | 55   |
| 76    | 0     | 48   | 0    | 0    | 51   | 0    |

|      |     |      |     |    |      |     |
|------|-----|------|-----|----|------|-----|
| 338  | 0   | 188  | 0   | 0  | 590  | 82  |
| 334  | 0   | 120  | 66  | 10 | 105  | 23  |
| 53   | 0   | 0    | 0   | 0  | 367  | 82  |
| 397  | 12  | 105  | 0   | 0  | 146  | 78  |
| 33   | 0   | 16   | 0   | 0  | 0    | 0   |
| 11   | 0   | 0    | 0   | 0  | 13   | 0   |
| 33   | 10  | 81   | 0   | 0  | 158  | 74  |
| 44   | 0   | 77   | 0   | 0  | 39   | 48  |
| 0    | 0   | 0    | 0   | 0  | 59   | 0   |
| 38   | 0   | 0    | 13  | 0  | 40   | 0   |
| 0    | 0   | 0    | 0   | 0  | 0    | 0   |
| 164  | 0   | 69   | 0   | 0  | 626  | 45  |
| 0    | 0   | 40   | 0   | 0  | 0    | 0   |
| 10   | 0   | 0    | 0   | 0  | 200  | 22  |
| 0    | 0   | 0    | 0   | 0  | 0    | 0   |
| 10   | 0   | 0    | 0   | 0  | 0    | 0   |
| 0    | 0   | 0    | 0   | 0  | 44   | 0   |
| 0    | 0   | 155  | 0   | 0  | 78   | 0   |
| 1283 | 423 | 1512 | 228 | 47 | 1048 | 849 |
| 0    | 0   | 0    | 0   | 0  | 0    | 0   |
| 0    | 0   | 0    | 0   | 0  | 0    | 0   |
| 0    | 0   | 0    | 0   | 0  | 0    | 0   |
| 0    | 0   | 0    | 0   | 0  | 0    | 0   |
| 763  | 352 | 773  | 37  | 10 | 408  | 441 |
| 0    | 0   | 0    | 0   | 0  | 0    | 0   |
| 27   | 0   | 60   | 14  | 0  | 13   | 0   |
| 226  | 127 | 39   | 0   | 0  | 0    | 89  |
| 287  | 131 | 22   | 0   | 0  | 40   | 100 |
| 0    | 0   | 25   | 0   | 0  | 0    | 0   |
| 37   | 0   | 71   | 0   | 0  | 0    | 0   |
| 10   | 0   | 0    | 0   | 0  | 0    | 0   |
| 0    | 0   | 13   | 0   | 0  | 0    | 0   |
| 0    | 0   | 13   | 0   | 0  | 0    | 0   |
| 18   | 0   | 48   | 0   | 0  | 0    | 0   |
| 475  | 139 | 514  | 10  | 0  | 14   | 126 |
| 0    | 0   | 22   | 0   | 0  | 0    | 0   |
| 0    | 0   | 0    | 0   | 0  | 0    | 0   |
| 0    | 0   | 0    | 0   | 0  | 0    | 0   |
| 24   | 0   | 42   | 0   | 0  | 0    | 0   |
| 30   | 0   | 0    | 43  | 0  | 0    | 0   |
| 0    | 0   | 0    | 0   | 0  | 31   | 0   |
| 66   | 13  | 12   | 0   | 0  | 33   | 0   |
| 109  | 37  | 24   | 21  | 0  | 102  | 29  |
| 69   | 11  | 42   | 20  | 0  | 67   | 52  |
| 0    | 0   | 0    | 0   | 0  | 0    | 0   |
| 0    | 0   | 0    | 0   | 0  | 0    | 0   |

|      |     |     |     |     |      |      |
|------|-----|-----|-----|-----|------|------|
| 104  | 0   | 121 | 0   | 0   | 49   | 34   |
| 0    | 0   | 0   | 0   | 0   | 0    | 0    |
| 0    | 0   | 0   | 0   | 0   | 16   | 0    |
| 1494 | 214 | 596 | 70  | 108 | 4574 | 1013 |
| 23   | 0   | 133 | 0   | 0   | 27   | 0    |
| 0    | 0   | 135 | 0   | 0   | 0    | 10   |
| 0    | 0   | 66  | 0   | 0   | 31   | 0    |
| 13   | 0   | 48  | 0   | 0   | 20   | 0    |
| 0    | 0   | 24  | 0   | 0   | 12   | 0    |
| 86   | 64  | 0   | 0   | 0   | 26   | 55   |
| 111  | 10  | 871 | 0   | 16  | 111  | 16   |
| 372  | 49  | 889 | 116 | 19  | 359  | 219  |
| 146  | 0   | 765 | 0   | 0   | 66   | 34   |
| 304  | 45  | 703 | 85  | 15  | 458  | 205  |
| 59   | 0   | 225 | 0   | 0   | 0    | 34   |
| 0    | 0   | 0   | 0   | 0   | 0    | 0    |
| 0    | 0   | 0   | 0   | 0   | 0    | 0    |
| 36   | 15  | 111 | 0   | 0   | 19   | 10   |
| 0    | 0   | 0   | 0   | 0   | 0    | 0    |
| 0    | 0   | 0   | 0   | 0   | 0    | 0    |
| 73   | 0   | 81  | 0   | 0   | 56   | 24   |
| 0    | 0   | 0   | 0   | 0   | 0    | 0    |
| 27   | 0   | 59  | 0   | 0   | 70   | 0    |
| 123  | 0   | 871 | 0   | 0   | 131  | 36   |
| 0    | 0   | 0   | 0   | 0   | 0    | 0    |
| 0    | 0   | 0   | 0   | 0   | 0    | 0    |
| 11   | 0   | 42  | 0   | 0   | 49   | 0    |
| 0    | 0   | 0   | 0   | 0   | 0    | 0    |
| 581  | 129 | 207 | 38  | 20  | 1118 | 374  |
| 0    | 0   | 0   | 0   | 0   | 10   | 0    |
| 11   | 0   | 0   | 0   | 0   | 24   | 0    |
| 106  | 0   | 0   | 0   | 0   | 86   | 0    |
| 40   | 0   | 13  | 0   | 0   | 86   | 11   |
| 0    | 0   | 11  | 0   | 0   | 0    | 0    |
| 0    | 0   | 0   | 0   | 0   | 0    | 0    |
| 0    | 0   | 0   | 0   | 0   | 0    | 0    |
| 0    | 0   | 0   | 0   | 0   | 0    | 0    |
| 367  | 22  | 392 | 37  | 0   | 242  | 155  |
| 0    | 0   | 0   | 0   | 0   | 0    | 0    |
| 15   | 0   | 84  | 0   | 0   | 10   | 0    |
| 36   | 0   | 127 | 0   | 0   | 0    | 10   |
| 35   | 0   | 24  | 0   | 0   | 0    | 0    |
| 0    | 0   | 45  | 0   | 0   | 0    | 0    |
| 0    | 0   | 0   | 0   | 0   | 0    | 0    |
| 0    | 0   | 0   | 0   | 0   | 0    | 0    |
| 0    | 0   | 0   | 0   | 0   | 0    | 0    |

|       |     |       |     |     |      |      |
|-------|-----|-------|-----|-----|------|------|
| 28    | 0   | 10    | 0   | 0   | 141  | 40   |
| 58    | 0   | 0     | 0   | 0   | 0    | 0    |
| 0     | 0   | 0     | 0   | 0   | 0    | 0    |
| 0     | 0   | 0     | 0   | 0   | 0    | 0    |
| 0     | 0   | 12    | 0   | 0   | 0    | 0    |
| 0     | 0   | 297   | 0   | 0   | 0    | 0    |
| 12    | 0   | 10    | 0   | 0   | 0    | 0    |
| 95    | 19  | 23    | 0   | 0   | 31   | 50   |
| 1412  | 323 | 1630  | 88  | 43  | 2989 | 1433 |
| 79    | 0   | 58    | 23  | 0   | 181  | 68   |
| 124   | 72  | 13    | 0   | 0   | 37   | 50   |
| 419   | 85  | 880   | 103 | 0   | 1084 | 247  |
| 0     | 0   | 32    | 0   | 0   | 0    | 0    |
| 25    | 0   | 0     | 0   | 0   | 0    | 0    |
| 20    | 20  | 74    | 0   | 0   | 78   | 0    |
| 1109  | 247 | 576   | 0   | 0   | 1981 | 341  |
| 12    | 0   | 58    | 0   | 0   | 258  | 0    |
| 0     | 0   | 0     | 0   | 0   | 0    | 0    |
| 10    | 0   | 12    | 0   | 0   | 10   | 0    |
| 0     | 0   | 0     | 0   | 0   | 40   | 11   |
| 0     | 0   | 0     | 0   | 0   | 0    | 0    |
| 0     | 0   | 0     | 0   | 0   | 35   | 0    |
| 0     | 0   | 0     | 0   | 0   | 0    | 0    |
| 125   | 12  | 199   | 0   | 0   | 742  | 113  |
| 2657  | 224 | 2635  | 0   | 0   | 225  | 246  |
| 1252  | 666 | 1806  | 28  | 21  | 1656 | 1079 |
| 118   | 95  | 256   | 0   | 0   | 152  | 270  |
| 49    | 143 | 11    | 0   | 0   | 24   | 165  |
| 507   | 358 | 209   | 0   | 46  | 125  | 244  |
| 21    | 0   | 0     | 0   | 0   | 0    | 0    |
| 0     | 0   | 0     | 0   | 0   | 0    | 0    |
| 19    | 0   | 27    | 0   | 0   | 0    | 0    |
| 36    | 99  | 0     | 0   | 10  | 32   | 47   |
| 65    | 73  | 0     | 0   | 0   | 56   | 116  |
| 130   | 195 | 81    | 21  | 0   | 271  | 699  |
| 28    | 0   | 11    | 0   | 0   | 34   | 0    |
| 2419  | 0   | 1094  | 0   | 10  | 0    | 34   |
| 24976 | 966 | 37686 | 338 | 275 | 869  | 3127 |
| 735   | 54  | 1817  | 10  | 13  | 0    | 57   |
| 11    | 0   | 22    | 0   | 0   | 0    | 0    |
| 3243  | 0   | 4132  | 0   | 25  | 201  | 445  |
| 222   | 0   | 49    | 0   | 0   | 0    | 0    |
| 153   | 13  | 54    | 0   | 0   | 0    | 27   |
| 121   | 0   | 391   | 0   | 0   | 0    | 12   |
| 0     | 0   | 0     | 0   | 0   | 0    | 0    |
| 234   | 21  | 1101  | 10  | 10  | 0    | 51   |

|      |      |      |      |     |       |      |
|------|------|------|------|-----|-------|------|
| 25   | 0    | 327  | 0    | 0   | 0     | 11   |
| 86   | 0    | 452  | 0    | 0   | 0     | 0    |
| 73   | 0    | 0    | 0    | 0   | 0     | 0    |
| 984  | 59   | 3203 | 11   | 33  | 30    | 165  |
| 11   | 11   | 19   | 0    | 0   | 91    | 22   |
| 92   | 83   | 102  | 0    | 0   | 84    | 285  |
| 78   | 21   | 252  | 0    | 0   | 189   | 69   |
| 86   | 110  | 224  | 0    | 0   | 90    | 227  |
| 43   | 12   | 66   | 0    | 0   | 83    | 39   |
| 99   | 65   | 59   | 0    | 0   | 0     | 39   |
| 1408 | 759  | 1090 | 0    | 62  | 339   | 424  |
| 104  | 0    | 641  | 0    | 0   | 0     | 32   |
| 0    | 0    | 0    | 0    | 0   | 0     | 0    |
| 34   | 0    | 40   | 10   | 0   | 0     | 0    |
| 0    | 0    | 0    | 0    | 0   | 25    | 61   |
| 0    | 0    | 0    | 0    | 0   | 11    | 0    |
| 0    | 0    | 0    | 0    | 0   | 0     | 0    |
| 12   | 0    | 0    | 0    | 0   | 33    | 0    |
| 198  | 0    | 74   | 12   | 10  | 335   | 51   |
| 0    | 0    | 0    | 0    | 0   | 0     | 0    |
| 74   | 0    | 0    | 0    | 0   | 111   | 10   |
| 0    | 0    | 0    | 0    | 0   | 21    | 0    |
| 389  | 10   | 1236 | 0    | 0   | 10    | 28   |
| 0    | 0    | 750  | 0    | 0   | 0     | 0    |
| 1302 | 43   | 1838 | 0    | 0   | 48    | 242  |
| 0    | 0    | 129  | 0    | 0   | 0     | 0    |
| 0    | 0    | 36   | 0    | 0   | 0     | 0    |
| 48   | 0    | 514  | 0    | 0   | 0     | 11   |
| 12   | 16   | 136  | 0    | 0   | 0     | 0    |
| 0    | 0    | 22   | 0    | 0   | 0     | 0    |
| 0    | 0    | 141  | 0    | 0   | 0     | 0    |
| 10   | 0    | 23   | 0    | 0   | 0     | 0    |
| 0    | 0    | 47   | 0    | 0   | 0     | 0    |
| 50   | 0    | 228  | 0    | 0   | 11    | 0    |
| 0    | 0    | 0    | 0    | 0   | 0     | 0    |
| 50   | 0    | 167  | 0    | 0   | 0     | 0    |
| 119  | 0    | 706  | 17   | 0   | 0     | 56   |
| 295  | 220  | 932  | 0    | 0   | 82    | 41   |
| 7988 | 1682 | 7242 | 1368 | 506 | 16781 | 6786 |
| 20   | 0    | 194  | 0    | 0   | 0     | 0    |
| 0    | 0    | 0    | 0    | 0   | 0     | 0    |
| 0    | 0    | 10   | 0    | 0   | 0     | 0    |
| 325  | 127  | 466  | 0    | 14  | 40    | 45   |
| 10   | 71   | 122  | 0    | 0   | 21    | 72   |
| 0    | 0    | 163  | 0    | 0   | 0     | 0    |
| 0    | 0    | 0    | 0    | 0   | 0     | 0    |

|      |      |      |     |     |      |      |
|------|------|------|-----|-----|------|------|
| 11   | 0    | 72   | 0   | 0   | 0    | 0    |
| 189  | 216  | 368  | 0   | 0   | 102  | 392  |
| 0    | 0    | 159  | 0   | 0   | 10   | 0    |
| 0    | 0    | 94   | 0   | 0   | 0    | 0    |
| 0    | 0    | 22   | 0   | 0   | 0    | 0    |
| 0    | 0    | 63   | 0   | 0   | 68   | 0    |
| 49   | 0    | 53   | 0   | 0   | 0    | 0    |
| 0    | 0    | 11   | 0   | 0   | 26   | 0    |
| 0    | 0    | 0    | 0   | 0   | 0    | 0    |
| 11   | 0    | 128  | 0   | 0   | 0    | 0    |
| 0    | 0    | 56   | 0   | 0   | 0    | 0    |
| 367  | 10   | 764  | 0   | 0   | 36   | 11   |
| 4784 | 1024 | 1802 | 225 | 145 | 6339 | 1324 |
| 552  | 51   | 191  | 135 | 18  | 818  | 320  |
| 65   | 10   | 710  | 0   | 0   | 0    | 20   |
| 0    | 0    | 59   | 0   | 0   | 0    | 0    |
| 0    | 0    | 41   | 0   | 0   | 0    | 0    |
| 29   | 0    | 0    | 0   | 0   | 0    | 0    |
| 150  | 0    | 59   | 0   | 0   | 151  | 12   |
| 1204 | 308  | 473  | 57  | 42  | 1993 | 600  |
| 605  | 115  | 279  | 0   | 14  | 748  | 315  |
| 106  | 50   | 104  | 12  | 0   | 253  | 81   |
| 257  | 48   | 653  | 10  | 0   | 45   | 96   |
| 0    | 0    | 50   | 0   | 0   | 0    | 0    |
| 0    | 0    | 0    | 0   | 0   | 54   | 0    |
| 0    | 0    | 27   | 0   | 0   | 0    | 0    |
| 37   | 0    | 211  | 0   | 0   | 0    | 0    |
| 578  | 99   | 320  | 0   | 0   | 1104 | 98   |
| 73   | 0    | 395  | 0   | 0   | 0    | 88   |
| 12   | 0    | 94   | 0   | 0   | 21   | 12   |
| 0    | 0    | 216  | 0   | 0   | 0    | 0    |
| 0    | 0    | 0    | 0   | 0   | 0    | 0    |
| 376  | 129  | 160  | 14  | 0   | 2350 | 585  |
| 10   | 0    | 0    | 12  | 0   | 59   | 0    |
| 12   | 0    | 15   | 0   | 0   | 57   | 21   |
| 0    | 0    | 32   | 0   | 0   | 0    | 0    |
| 164  | 26   | 96   | 0   | 0   | 471  | 111  |
| 21   | 0    | 0    | 0   | 0   | 143  | 0    |
| 74   | 0    | 91   | 0   | 0   | 472  | 443  |
| 266  | 79   | 176  | 0   | 0   | 900  | 276  |
| 0    | 0    | 0    | 0   | 0   | 132  | 155  |
| 10   | 0    | 24   | 0   | 0   | 0    | 12   |
| 0    | 0    | 30   | 0   | 0   | 0    | 12   |
| 950  | 644  | 2403 | 38  | 21  | 859  | 643  |
| 30   | 0    | 35   | 0   | 0   | 84   | 0    |
| 65   | 0    | 20   | 0   | 0   | 21   | 0    |

|      |     |     |    |    |      |     |
|------|-----|-----|----|----|------|-----|
| 0    | 0   | 10  | 0  | 0  | 0    | 0   |
| 0    | 0   | 0   | 0  | 0  | 0    | 0   |
| 0    | 0   | 0   | 0  | 0  | 0    | 0   |
| 20   | 43  | 0   | 0  | 0  | 202  | 70  |
| 184  | 152 | 252 | 12 | 12 | 650  | 700 |
| 369  | 387 | 473 | 24 | 0  | 274  | 210 |
| 69   | 115 | 35  | 0  | 0  | 626  | 231 |
| 19   | 35  | 37  | 0  | 0  | 10   | 36  |
| 265  | 392 | 558 | 62 | 23 | 248  | 220 |
| 12   | 0   | 0   | 0  | 0  | 0    | 0   |
| 0    | 0   | 0   | 0  | 0  | 0    | 0   |
| 11   | 35  | 544 | 0  | 0  | 41   | 94  |
| 0    | 0   | 183 | 0  | 0  | 23   | 14  |
| 0    | 0   | 0   | 0  | 0  | 0    | 0   |
| 0    | 0   | 0   | 0  | 0  | 0    | 0   |
| 0    | 0   | 0   | 0  | 0  | 0    | 0   |
| 0    | 0   | 0   | 0  | 0  | 0    | 0   |
| 83   | 0   | 740 | 0  | 0  | 48   | 92  |
| 0    | 0   | 125 | 0  | 0  | 0    | 0   |
| 64   | 0   | 25  | 0  | 0  | 73   | 0   |
| 927  | 55  | 740 | 0  | 0  | 356  | 31  |
| 16   | 0   | 0   | 0  | 0  | 0    | 0   |
| 3206 | 257 | 991 | 0  | 15 | 2057 | 375 |
| 36   | 0   | 0   | 0  | 0  | 49   | 0   |
| 1984 | 206 | 596 | 68 | 0  | 2793 | 673 |
| 0    | 0   | 0   | 0  | 0  | 0    | 0   |
| 536  | 11  | 251 | 0  | 0  | 132  | 0   |
| 1063 | 50  | 295 | 39 | 0  | 1436 | 301 |
| 27   | 0   | 0   | 0  | 0  | 31   | 0   |
| 0    | 0   | 0   | 0  | 0  | 10   | 0   |
| 0    | 0   | 0   | 0  | 0  | 0    | 0   |
| 0    | 0   | 0   | 0  | 0  | 74   | 0   |
| 30   | 0   | 0   | 0  | 0  | 0    | 0   |
| 35   | 0   | 0   | 0  | 0  | 44   | 0   |
| 28   | 14  | 27  | 0  | 0  | 179  | 0   |
| 0    | 0   | 10  | 0  | 0  | 0    | 0   |
| 15   | 0   | 91  | 0  | 0  | 31   | 0   |
| 0    | 0   | 0   | 0  | 0  | 42   | 0   |
| 10   | 0   | 0   | 0  | 0  | 0    | 0   |
| 0    | 117 | 0   | 0  | 0  | 0    | 54  |
| 10   | 0   | 0   | 11 | 0  | 0    | 0   |
| 10   | 0   | 11  | 32 | 12 | 35   | 0   |
| 322  | 0   | 501 | 0  | 13 | 958  | 256 |
| 14   | 0   | 0   | 0  | 47 | 131  | 0   |
| 49   | 0   | 54  | 0  | 0  | 192  | 0   |
| 0    | 0   | 0   | 0  | 0  | 0    | 0   |



|       |       |       |      |      |       |      |
|-------|-------|-------|------|------|-------|------|
| 0     | 0     | 0     | 0    | 0    | 26    | 20   |
| 143   | 89    | 185   | 0    | 21   | 727   | 1692 |
| 0     | 0     | 10    | 0    | 0    | 331   | 528  |
| 59    | 0     | 175   | 0    | 0    | 69    | 68   |
| 0     | 0     | 0     | 0    | 0    | 0     | 0    |
| 0     | 0     | 60    | 0    | 0    | 10    | 52   |
| 22    | 0     | 137   | 0    | 0    | 10    | 0    |
| 102   | 0     | 28    | 0    | 0    | 74    | 108  |
| 1214  | 1719  | 1960  | 275  | 147  | 9396  | 1115 |
| 717   | 115   | 595   | 176  | 237  | 4475  | 927  |
| 286   | 57    | 350   | 23   | 78   | 1748  | 537  |
| 21    | 0     | 0     | 0    | 0    | 37    | 12   |
| 11    | 0     | 0     | 0    | 0    | 36    | 0    |
| 0     | 0     | 20    | 0    | 0    | 0     | 47   |
| 0     | 0     | 0     | 0    | 0    | 0     | 0    |
| 65    | 0     | 287   | 0    | 17   | 52    | 37   |
| 0     | 0     | 0     | 0    | 0    | 23    | 10   |
| 10    | 0     | 0     | 0    | 0    | 42    | 0    |
| 0     | 0     | 37    | 0    | 0    | 0     | 0    |
| 0     | 0     | 10    | 0    | 0    | 0     | 0    |
| 208   | 70    | 386   | 0    | 12   | 446   | 66   |
| 99    | 0     | 795   | 23   | 0    | 409   | 124  |
| 46    | 0     | 10    | 0    | 0    | 96    | 16   |
| 0     | 0     | 0     | 0    | 0    | 11    | 0    |
| 0     | 0     | 0     | 0    | 0    | 0     | 0    |
| 209   | 221   | 863   | 10   | 22   | 560   | 1540 |
| 3000  | 2744  | 5140  | 86   | 375  | 2948  | 4633 |
| 2191  | 2804  | 2333  | 11   | 447  | 2421  | 779  |
| 21608 | 14782 | 40358 | 1156 | 3475 | 10674 | 6292 |
| 95    | 293   | 432   | 17   | 0    | 149   | 60   |
| 169   | 705   | 444   | 30   | 0    | 187   | 32   |
| 120   | 0     | 50    | 12   | 0    | 146   | 75   |
| 5806  | 2749  | 2719  | 417  | 322  | 2603  | 1298 |
| 1680  | 3766  | 1464  | 85   | 127  | 1919  | 1378 |
| 35    | 123   | 14    | 0    | 0    | 191   | 110  |
| 2740  | 13    | 1018  | 0    | 0    | 0     | 0    |
| 1304  | 529   | 4308  | 224  | 284  | 2408  | 1734 |
| 1217  | 348   | 2504  | 10   | 46   | 1366  | 1156 |
| 1097  | 54    | 1174  | 41   | 129  | 1196  | 139  |
| 1423  | 77    | 1179  | 11   | 117  | 763   | 93   |
| 0     | 0     | 0     | 0    | 0    | 0     | 0    |
| 50    | 0     | 0     | 0    | 0    | 0     | 0    |
| 1043  | 201   | 6485  | 147  | 652  | 1139  | 643  |
| 54    | 0     | 373   | 0    | 0    | 75    | 0    |
| 0     | 0     | 0     | 0    | 0    | 0     | 0    |
| 419   | 280   | 710   | 11   | 72   | 1082  | 595  |

|      |      |      |      |     |       |       |
|------|------|------|------|-----|-------|-------|
| 286  | 204  | 1277 | 0    | 18  | 663   | 1048  |
| 3551 | 1431 | 7310 | 1204 | 405 | 22555 | 22703 |
| 0    | 21   | 39   | 0    | 0   | 13    | 10    |
| 292  | 154  | 25   | 0    | 0   | 1281  | 23876 |
| 10   | 12   | 267  | 0    | 18  | 153   | 93    |
| 0    | 0    | 65   | 0    | 0   | 131   | 38    |
| 297  | 282  | 1941 | 24   | 0   | 2272  | 1002  |
| 80   | 51   | 512  | 13   | 13  | 407   | 80    |
| 0    | 0    | 0    | 0    | 0   | 0     | 0     |
| 42   | 18   | 60   | 0    | 0   | 85    | 79    |
| 29   | 103  | 364  | 0    | 16  | 120   | 244   |
| 42   | 29   | 287  | 0    | 0   | 61    | 404   |
| 0    | 0    | 29   | 0    | 0   | 0     | 0     |
| 0    | 0    | 0    | 0    | 0   | 0     | 0     |
| 251  | 0    | 102  | 0    | 0   | 244   | 31    |
| 2985 | 406  | 1074 | 48   | 10  | 568   | 466   |
| 171  | 98   | 812  | 39   | 19  | 124   | 130   |
| 399  | 28   | 346  | 0    | 0   | 44    | 38    |
| 130  | 0    | 70   | 0    | 0   | 18    | 0     |
| 15   | 0    | 106  | 0    | 10  | 0     | 0     |
| 129  | 62   | 366  | 0    | 0   | 139   | 23    |
| 0    | 0    | 35   | 0    | 0   | 0     | 0     |
| 0    | 0    | 0    | 0    | 0   | 0     | 0     |
| 11   | 0    | 70   | 0    | 0   | 0     | 0     |
| 55   | 97   | 120  | 0    | 0   | 220   | 481   |
| 0    | 0    | 0    | 0    | 0   | 0     | 0     |
| 0    | 0    | 0    | 0    | 0   | 0     | 0     |
| 0    | 0    | 0    | 0    | 0   | 0     | 0     |
| 0    | 0    | 80   | 0    | 0   | 0     | 0     |
| 75   | 0    | 13   | 0    | 0   | 42    | 0     |
| 12   | 0    | 10   | 0    | 0   | 29    | 0     |
| 0    | 0    | 0    | 0    | 0   | 0     | 0     |
| 50   | 0    | 0    | 0    | 0   | 787   | 44    |
| 234  | 178  | 0    | 0    | 0   | 505   | 498   |
| 11   | 0    | 372  | 34   | 0   | 82    | 0     |
| 13   | 0    | 202  | 26   | 0   | 287   | 25    |
| 401  | 205  | 375  | 45   | 23  | 98    | 13    |
| 78   | 129  | 633  | 67   | 0   | 38    | 0     |
| 556  | 450  | 1111 | 119  | 0   | 721   | 1611  |
| 35   | 0    | 0    | 20   | 0   | 117   | 10    |
| 50   | 0    | 10   | 13   | 0   | 130   | 17    |
| 25   | 0    | 465  | 29   | 0   | 28    | 135   |
| 0    | 0    | 0    | 0    | 0   | 0     | 0     |
| 65   | 13   | 251  | 0    | 0   | 12    | 34    |
| 12   | 0    | 0    | 0    | 0   | 0     | 12    |
| 37   | 0    | 378  | 0    | 0   | 29    | 49    |

|     |     |     |    |     |      |     |
|-----|-----|-----|----|-----|------|-----|
| 0   | 0   | 12  | 0  | 0   | 0    | 0   |
| 0   | 0   | 153 | 0  | 0   | 11   | 114 |
| 55  | 0   | 110 | 10 | 0   | 106  | 53  |
| 0   | 0   | 0   | 0  | 0   | 25   | 0   |
| 0   | 0   | 0   | 0  | 0   | 1095 | 46  |
| 0   | 0   | 0   | 0  | 0   | 10   | 0   |
| 0   | 0   | 0   | 0  | 0   | 0    | 0   |
| 0   | 0   | 0   | 0  | 0   | 0    | 0   |
| 0   | 0   | 0   | 0  | 0   | 42   | 0   |
| 26  | 0   | 50  | 18 | 0   | 11   | 23  |
| 32  | 0   | 0   | 0  | 0   | 0    | 0   |
| 69  | 0   | 0   | 0  | 0   | 242  | 17  |
| 965 | 374 | 121 | 31 | 11  | 37   | 33  |
| 104 | 26  | 246 | 51 | 19  | 45   | 10  |
| 484 | 183 | 862 | 17 | 116 | 19   | 0   |
| 139 | 293 | 11  | 0  | 0   | 74   | 54  |
| 54  | 16  | 86  | 12 | 19  | 0    | 0   |
| 751 | 395 | 121 | 0  | 0   | 32   | 24  |
| 144 | 0   | 0   | 0  | 0   | 38   | 0   |
| 0   | 0   | 0   | 0  | 0   | 0    | 0   |
| 144 | 31  | 68  | 11 | 0   | 23   | 30  |
| 48  | 209 | 55  | 0  | 0   | 23   | 22  |
| 14  | 0   | 11  | 0  | 0   | 11   | 0   |
| 0   | 0   | 0   | 0  | 0   | 38   | 0   |
| 31  | 0   | 32  | 0  | 0   | 84   | 0   |
| 35  | 0   | 0   | 0  | 0   | 12   | 0   |
| 0   | 0   | 0   | 0  | 0   | 0    | 0   |
| 80  | 0   | 0   | 0  | 0   | 159  | 22  |
| 22  | 212 | 0   | 11 | 0   | 0    | 30  |
| 0   | 0   | 0   | 0  | 0   | 12   | 0   |
| 0   | 0   | 0   | 0  | 0   | 0    | 0   |
| 0   | 0   | 0   | 0  | 0   | 0    | 0   |
| 66  | 0   | 0   | 0  | 28  | 0    | 0   |
| 28  | 0   | 12  | 0  | 0   | 0    | 0   |
| 112 | 25  | 0   | 0  | 21  | 41   | 0   |
| 0   | 0   | 0   | 0  | 0   | 0    | 0   |
| 0   | 0   | 0   | 0  | 0   | 0    | 0   |
| 0   | 0   | 0   | 0  | 0   | 0    | 0   |
| 0   | 0   | 0   | 0  | 0   | 0    | 0   |
| 0   | 0   | 0   | 0  | 0   | 75   | 0   |
| 0   | 0   | 0   | 0  | 0   | 0    | 0   |
| 0   | 0   | 0   | 0  | 0   | 33   | 0   |
| 0   | 0   | 0   | 0  | 0   | 0    | 0   |
| 71  | 0   | 0   | 0  | 0   | 0    | 0   |
| 252 | 16  | 29  | 0  | 12  | 0    | 0   |
| 0   | 0   | 22  | 0  | 0   | 58   | 0   |

|     |     |      |    |    |     |     |
|-----|-----|------|----|----|-----|-----|
| 0   | 0   | 0    | 0  | 0  | 16  | 0   |
| 0   | 25  | 0    | 0  | 0  | 0   | 12  |
| 10  | 0   | 0    | 0  | 0  | 0   | 0   |
| 0   | 0   | 89   | 0  | 0  | 29  | 71  |
| 34  | 0   | 10   | 0  | 0  | 0   | 0   |
| 0   | 0   | 0    | 0  | 0  | 0   | 0   |
| 99  | 22  | 0    | 0  | 0  | 115 | 45  |
| 40  | 0   | 0    | 0  | 0  | 26  | 0   |
| 0   | 0   | 0    | 0  | 0  | 56  | 0   |
| 45  | 118 | 146  | 0  | 0  | 24  | 11  |
| 0   | 0   | 11   | 0  | 0  | 0   | 0   |
| 10  | 0   | 0    | 0  | 0  | 0   | 0   |
| 25  | 22  | 131  | 19 | 0  | 22  | 11  |
| 0   | 0   | 0    | 0  | 0  | 10  | 0   |
| 0   | 27  | 0    | 0  | 0  | 62  | 0   |
| 0   | 0   | 25   | 0  | 0  | 0   | 0   |
| 67  | 0   | 0    | 0  | 0  | 77  | 35  |
| 0   | 0   | 0    | 0  | 0  | 43  | 0   |
| 726 | 263 | 954  | 0  | 44 | 74  | 41  |
| 12  | 0   | 0    | 0  | 0  | 48  | 0   |
| 347 | 0   | 67   | 10 | 0  | 0   | 0   |
| 41  | 0   | 0    | 0  | 0  | 0   | 0   |
| 0   | 0   | 0    | 0  | 0  | 138 | 0   |
| 102 | 0   | 128  | 32 | 0  | 195 | 191 |
| 0   | 0   | 0    | 0  | 0  | 56  | 54  |
| 0   | 0   | 0    | 0  | 0  | 58  | 61  |
| 0   | 0   | 0    | 0  | 0  | 62  | 0   |
| 0   | 0   | 0    | 0  | 0  | 35  | 0   |
| 0   | 0   | 0    | 0  | 0  | 11  | 0   |
| 0   | 0   | 0    | 0  | 0  | 0   | 0   |
| 27  | 16  | 0    | 0  | 0  | 0   | 34  |
| 0   | 0   | 0    | 0  | 0  | 44  | 0   |
| 14  | 0   | 0    | 0  | 0  | 54  | 31  |
| 49  | 0   | 0    | 0  | 0  | 56  | 35  |
| 0   | 0   | 0    | 0  | 0  | 0   | 0   |
| 49  | 0   | 0    | 0  | 0  | 0   | 0   |
| 0   | 0   | 0    | 0  | 0  | 0   | 0   |
| 0   | 0   | 0    | 0  | 0  | 51  | 0   |
| 0   | 0   | 0    | 0  | 0  | 13  | 0   |
| 62  | 0   | 0    | 0  | 0  | 11  | 0   |
| 35  | 0   | 1344 | 49 | 26 | 36  | 118 |
| 0   | 0   | 0    | 0  | 10 | 0   | 36  |
| 16  | 0   | 242  | 0  | 0  | 0   | 0   |
| 0   | 0   | 0    | 0  | 0  | 0   | 0   |
| 47  | 0   | 28   | 0  | 0  | 0   | 0   |
| 0   | 0   | 0    | 0  | 0  | 0   | 0   |

|     |     |     |   |     |     |     |
|-----|-----|-----|---|-----|-----|-----|
| 22  | 0   | 0   | 0 | 0   | 0   | 0   |
| 0   | 0   | 0   | 0 | 0   | 0   | 0   |
| 199 | 0   | 0   | 0 | 0   | 52  | 0   |
| 0   | 0   | 0   | 0 | 0   | 0   | 0   |
| 685 | 0   | 10  | 0 | 10  | 28  | 0   |
| 598 | 24  | 323 | 0 | 178 | 94  | 391 |
| 0   | 0   | 0   | 0 | 0   | 0   | 0   |
| 50  | 0   | 718 | 0 | 0   | 0   | 0   |
| 0   | 0   | 0   | 0 | 0   | 0   | 0   |
| 0   | 0   | 0   | 0 | 0   | 0   | 0   |
| 0   | 0   | 0   | 0 | 0   | 56  | 0   |
| 0   | 0   | 0   | 0 | 0   | 24  | 10  |
| 111 | 10  | 0   | 0 | 0   | 22  | 0   |
| 0   | 0   | 0   | 0 | 0   | 0   | 0   |
| 0   | 0   | 0   | 0 | 0   | 0   | 0   |
| 0   | 0   | 0   | 0 | 0   | 41  | 0   |
| 0   | 0   | 0   | 0 | 0   | 87  | 0   |
| 28  | 0   | 11  | 0 | 0   | 82  | 0   |
| 88  | 16  | 47  | 0 | 0   | 0   | 0   |
| 0   | 0   | 0   | 0 | 0   | 0   | 0   |
| 0   | 0   | 0   | 0 | 0   | 26  | 0   |
| 0   | 0   | 0   | 0 | 0   | 40  | 0   |
| 0   | 0   | 0   | 0 | 0   | 108 | 0   |
| 265 | 0   | 0   | 0 | 0   | 31  | 0   |
| 125 | 0   | 12  | 0 | 0   | 54  | 0   |
| 55  | 360 | 634 | 0 | 0   | 96  | 82  |
| 19  | 0   | 0   | 0 | 0   | 13  | 0   |
| 76  | 0   | 0   | 0 | 0   | 108 | 0   |
| 41  | 177 | 55  | 0 | 15  | 49  | 26  |
| 0   | 0   | 0   | 0 | 0   | 83  | 0   |
| 27  | 0   | 0   | 0 | 0   | 126 | 0   |
| 0   | 29  | 0   | 0 | 0   | 44  | 94  |
| 0   | 0   | 0   | 0 | 0   | 0   | 0   |
| 157 | 639 | 486 | 0 | 0   | 78  | 37  |
| 0   | 0   | 118 | 0 | 0   | 83  | 0   |
| 0   | 0   | 0   | 0 | 0   | 47  | 0   |
| 0   | 0   | 0   | 0 | 0   | 27  | 0   |
| 11  | 0   | 0   | 0 | 0   | 47  | 0   |
| 11  | 0   | 14  | 0 | 0   | 20  | 0   |
| 18  | 0   | 0   | 0 | 0   | 109 | 0   |
| 45  | 98  | 0   | 0 | 0   | 0   | 0   |
| 159 | 32  | 412 | 0 | 0   | 0   | 0   |
| 62  | 0   | 0   | 0 | 0   | 90  | 0   |
| 0   | 0   | 44  | 0 | 0   | 26  | 0   |
| 0   | 0   | 0   | 0 | 0   | 0   | 0   |
| 220 | 0   | 188 | 0 | 0   | 99  | 14  |

|      |     |     |    |    |     |     |
|------|-----|-----|----|----|-----|-----|
| 100  | 0   | 0   | 0  | 0  | 164 | 0   |
| 10   | 0   | 0   | 0  | 0  | 0   | 0   |
| 0    | 0   | 0   | 0  | 0  | 0   | 0   |
| 0    | 0   | 0   | 0  | 0  | 135 | 10  |
| 143  | 60  | 0   | 0  | 0  | 50  | 11  |
| 26   | 0   | 0   | 0  | 0  | 14  | 0   |
| 65   | 0   | 0   | 0  | 0  | 0   | 0   |
| 16   | 16  | 0   | 0  | 0  | 71  | 0   |
| 0    | 0   | 0   | 0  | 0  | 0   | 0   |
| 0    | 0   | 0   | 0  | 0  | 67  | 0   |
| 374  | 0   | 0   | 0  | 0  | 124 | 11  |
| 68   | 0   | 0   | 0  | 0  | 44  | 14  |
| 224  | 44  | 32  | 0  | 0  | 293 | 54  |
| 0    | 0   | 0   | 0  | 0  | 115 | 0   |
| 104  | 31  | 22  | 0  | 0  | 58  | 89  |
| 14   | 10  | 0   | 0  | 0  | 67  | 0   |
| 95   | 0   | 0   | 0  | 0  | 98  | 22  |
| 0    | 0   | 0   | 0  | 0  | 683 | 308 |
| 700  | 0   | 13  | 11 | 0  | 267 | 801 |
| 0    | 0   | 0   | 0  | 0  | 25  | 0   |
| 0    | 0   | 0   | 0  | 0  | 64  | 0   |
| 16   | 0   | 73  | 0  | 0  | 225 | 0   |
| 0    | 0   | 0   | 0  | 0  | 184 | 0   |
| 0    | 0   | 0   | 0  | 0  | 421 | 41  |
| 14   | 0   | 0   | 0  | 0  | 192 | 0   |
| 0    | 0   | 0   | 0  | 0  | 61  | 0   |
| 200  | 207 | 60  | 0  | 35 | 165 | 26  |
| 63   | 96  | 88  | 0  | 0  | 41  | 0   |
| 175  | 151 | 108 | 0  | 12 | 125 | 0   |
| 0    | 0   | 0   | 0  | 0  | 11  | 0   |
| 595  | 0   | 21  | 0  | 10 | 10  | 0   |
| 1005 | 0   | 165 | 0  | 15 | 0   | 0   |
| 109  | 0   | 17  | 0  | 0  | 0   | 0   |
| 1429 | 0   | 256 | 0  | 53 | 0   | 0   |
| 0    | 0   | 0   | 0  | 0  | 0   | 0   |
| 28   | 0   | 0   | 0  | 15 | 10  | 0   |
| 189  | 0   | 24  | 0  | 0  | 0   | 0   |
| 150  | 25  | 25  | 0  | 0  | 93  | 0   |
| 115  | 11  | 0   | 0  | 0  | 13  | 15  |
| 10   | 0   | 0   | 0  | 0  | 10  | 0   |
| 515  | 46  | 0   | 0  | 0  | 160 | 62  |
| 43   | 10  | 0   | 0  | 0  | 96  | 11  |
| 64   | 0   | 65  | 0  | 0  | 196 | 0   |
| 46   | 0   | 34  | 0  | 0  | 53  | 0   |
| 0    | 0   | 0   | 0  | 0  | 79  | 0   |
| 0    | 0   | 0   | 0  | 0  | 23  | 0   |

|     |     |     |    |    |     |     |
|-----|-----|-----|----|----|-----|-----|
| 32  | 119 | 0   | 0  | 16 | 0   | 0   |
| 382 | 93  | 0   | 0  | 0  | 134 | 68  |
| 11  | 0   | 0   | 0  | 0  | 34  | 0   |
| 27  | 10  | 0   | 0  | 0  | 16  | 0   |
| 0   | 0   | 0   | 0  | 0  | 0   | 0   |
| 0   | 23  | 0   | 0  | 0  | 23  | 0   |
| 51  | 0   | 0   | 0  | 0  | 0   | 0   |
| 0   | 0   | 0   | 0  | 0  | 0   | 0   |
| 60  | 33  | 0   | 27 | 10 | 254 | 41  |
| 187 | 25  | 206 | 0  | 19 | 37  | 68  |
| 98  | 0   | 0   | 0  | 0  | 250 | 135 |
| 44  | 0   | 114 | 0  | 0  | 26  | 0   |
| 0   | 0   | 0   | 0  | 0  | 0   | 0   |
| 0   | 0   | 0   | 0  | 0  | 28  | 0   |
| 0   | 0   | 0   | 0  | 0  | 0   | 0   |
| 10  | 0   | 0   | 0  | 0  | 40  | 0   |
| 41  | 44  | 71  | 0  | 0  | 74  | 99  |
| 12  | 0   | 0   | 0  | 0  | 120 | 25  |
| 24  | 0   | 0   | 0  | 0  | 134 | 49  |
| 25  | 0   | 0   | 0  | 0  | 0   | 11  |
| 103 | 205 | 64  | 0  | 0  | 14  | 0   |
| 0   | 0   | 0   | 0  | 0  | 154 | 0   |
| 0   | 0   | 0   | 0  | 0  | 0   | 0   |
| 0   | 0   | 0   | 0  | 0  | 125 | 0   |
| 0   | 0   | 0   | 0  | 0  | 20  | 0   |
| 17  | 11  | 24  | 0  | 0  | 28  | 0   |
| 15  | 0   | 18  | 17 | 0  | 19  | 0   |
| 0   | 0   | 0   | 0  | 0  | 58  | 0   |
| 0   | 0   | 0   | 0  | 0  | 74  | 0   |
| 0   | 0   | 0   | 0  | 0  | 11  | 0   |
| 0   | 0   | 0   | 0  | 0  | 120 | 0   |
| 19  | 0   | 0   | 56 | 0  | 341 | 18  |
| 0   | 0   | 0   | 24 | 0  | 75  | 0   |
| 0   | 0   | 0   | 0  | 0  | 11  | 0   |
| 0   | 0   | 0   | 0  | 0  | 68  | 0   |
| 0   | 0   | 0   | 0  | 0  | 18  | 0   |
| 126 | 12  | 59  | 0  | 0  | 32  | 0   |
| 160 | 37  | 233 | 0  | 11 | 164 | 101 |
| 10  | 0   | 0   | 0  | 0  | 12  | 0   |
| 41  | 0   | 41  | 0  | 0  | 45  | 26  |
| 0   | 0   | 0   | 0  | 0  | 0   | 0   |
| 89  | 0   | 10  | 0  | 0  | 76  | 22  |
| 0   | 0   | 0   | 0  | 0  | 38  | 0   |
| 0   | 0   | 0   | 0  | 0  | 13  | 0   |
| 0   | 0   | 0   | 10 | 0  | 26  | 0   |
| 43  | 0   | 0   | 0  | 0  | 17  | 0   |

|    |    |     |    |   |     |      |
|----|----|-----|----|---|-----|------|
| 0  | 0  | 0   | 0  | 0 | 0   | 0    |
| 0  | 0  | 0   | 0  | 0 | 0   | 0    |
| 35 | 0  | 30  | 0  | 0 | 37  | 64   |
| 0  | 0  | 0   | 0  | 0 | 13  | 0    |
| 34 | 0  | 26  | 0  | 0 | 50  | 0    |
| 24 | 0  | 0   | 0  | 0 | 48  | 0    |
| 0  | 0  | 0   | 0  | 0 | 40  | 0    |
| 46 | 71 | 68  | 0  | 0 | 66  | 1830 |
| 0  | 0  | 0   | 0  | 0 | 0   | 0    |
| 46 | 10 | 10  | 0  | 0 | 17  | 0    |
| 99 | 0  | 15  | 0  | 0 | 108 | 45   |
| 0  | 0  | 0   | 0  | 0 | 28  | 0    |
| 13 | 0  | 0   | 0  | 0 | 63  | 0    |
| 0  | 0  | 0   | 0  | 0 | 10  | 0    |
| 28 | 0  | 0   | 0  | 0 | 43  | 0    |
| 0  | 0  | 0   | 0  | 0 | 11  | 0    |
| 0  | 0  | 0   | 0  | 0 | 0   | 0    |
| 0  | 0  | 0   | 0  | 0 | 0   | 0    |
| 11 | 0  | 0   | 0  | 0 | 29  | 0    |
| 19 | 0  | 16  | 0  | 0 | 72  | 29   |
| 0  | 0  | 0   | 0  | 0 | 0   | 0    |
| 0  | 0  | 0   | 0  | 0 | 0   | 0    |
| 0  | 0  | 0   | 0  | 0 | 0   | 0    |
| 0  | 14 | 0   | 0  | 0 | 11  | 29   |
| 0  | 0  | 0   | 0  | 0 | 0   | 0    |
| 0  | 0  | 0   | 0  | 0 | 0   | 0    |
| 0  | 0  | 0   | 0  | 0 | 59  | 0    |
| 41 | 0  | 0   | 0  | 0 | 14  | 65   |
| 0  | 0  | 10  | 0  | 0 | 16  | 0    |
| 38 | 0  | 0   | 0  | 0 | 0   | 0    |
| 12 | 0  | 23  | 0  | 0 | 12  | 0    |
| 27 | 0  | 0   | 0  | 0 | 43  | 10   |
| 0  | 0  | 0   | 0  | 0 | 41  | 0    |
| 0  | 0  | 0   | 0  | 0 | 0   | 0    |
| 0  | 0  | 370 | 0  | 0 | 179 | 177  |
| 32 | 0  | 149 | 35 | 0 | 0   | 13   |
| 0  | 0  | 10  | 0  | 0 | 20  | 12   |
| 0  | 0  | 0   | 0  | 0 | 0   | 0    |
| 54 | 40 | 83  | 0  | 0 | 317 | 490  |
| 19 | 0  | 22  | 0  | 0 | 68  | 0    |
| 0  | 0  | 20  | 0  | 0 | 12  | 0    |
| 12 | 0  | 0   | 0  | 0 | 141 | 31   |
| 0  | 0  | 10  | 0  | 0 | 0   | 0    |
| 0  | 0  | 0   | 0  | 0 | 27  | 0    |
| 45 | 43 | 51  | 0  | 0 | 193 | 89   |
| 0  | 0  | 0   | 0  | 0 | 31  | 33   |



|     |     |      |    |    |     |     |
|-----|-----|------|----|----|-----|-----|
| 70  | 0   | 0    | 0  | 0  | 115 | 126 |
| 0   | 0   | 0    | 0  | 0  | 0   | 0   |
| 0   | 0   | 0    | 0  | 0  | 0   | 0   |
| 93  | 11  | 0    | 53 | 0  | 55  | 0   |
| 0   | 0   | 0    | 0  | 0  | 41  | 0   |
| 38  | 0   | 10   | 0  | 0  | 45  | 10  |
| 26  | 0   | 0    | 0  | 0  | 0   | 0   |
| 83  | 0   | 21   | 0  | 0  | 49  | 0   |
| 0   | 0   | 57   | 0  | 0  | 11  | 0   |
| 0   | 0   | 21   | 0  | 0  | 0   | 0   |
| 0   | 0   | 74   | 0  | 0  | 39  | 0   |
| 13  | 0   | 10   | 0  | 0  | 27  | 10  |
| 85  | 0   | 90   | 0  | 0  | 0   | 0   |
| 89  | 0   | 0    | 0  | 0  | 81  | 0   |
| 272 | 0   | 208  | 0  | 0  | 115 | 12  |
| 13  | 0   | 0    | 0  | 0  | 70  | 10  |
| 61  | 0   | 0    | 0  | 0  | 0   | 0   |
| 34  | 0   | 0    | 0  | 0  | 177 | 0   |
| 0   | 0   | 0    | 0  | 0  | 88  | 0   |
| 0   | 0   | 0    | 25 | 0  | 11  | 0   |
| 0   | 0   | 0    | 0  | 0  | 0   | 0   |
| 0   | 0   | 0    | 0  | 0  | 0   | 0   |
| 20  | 0   | 0    | 0  | 0  | 366 | 0   |
| 36  | 54  | 0    | 0  | 0  | 26  | 284 |
| 47  | 0   | 0    | 0  | 0  | 83  | 27  |
| 99  | 441 | 43   | 11 | 0  | 166 | 394 |
| 0   | 0   | 0    | 0  | 0  | 0   | 0   |
| 0   | 0   | 0    | 0  | 0  | 37  | 43  |
| 0   | 0   | 0    | 0  | 0  | 45  | 0   |
| 0   | 0   | 0    | 0  | 0  | 220 | 0   |
| 0   | 0   | 0    | 0  | 0  | 0   | 0   |
| 0   | 0   | 0    | 0  | 0  | 31  | 0   |
| 0   | 0   | 0    | 0  | 0  | 34  | 0   |
| 0   | 0   | 0    | 0  | 0  | 34  | 0   |
| 0   | 0   | 0    | 0  | 0  | 0   | 0   |
| 18  | 0   | 0    | 0  | 0  | 29  | 0   |
| 0   | 0   | 0    | 0  | 0  | 68  | 0   |
| 0   | 0   | 0    | 0  | 0  | 0   | 0   |
| 0   | 0   | 0    | 0  | 0  | 0   | 0   |
| 0   | 0   | 0    | 0  | 0  | 0   | 0   |
| 259 | 113 | 1021 | 10 | 73 | 163 | 185 |
| 0   | 0   | 0    | 0  | 0  | 167 | 0   |
| 0   | 0   | 0    | 0  | 0  | 74  | 20  |
| 33  | 0   | 12   | 0  | 0  | 27  | 0   |
| 0   | 0   | 0    | 0  | 0  | 73  | 0   |
| 0   | 0   | 0    | 0  | 0  | 41  | 0   |

|     |     |      |    |    |     |      |
|-----|-----|------|----|----|-----|------|
| 0   | 0   | 0    | 0  | 0  | 82  | 12   |
| 0   | 0   | 0    | 0  | 0  | 0   | 0    |
| 23  | 0   | 0    | 12 | 19 | 462 | 144  |
| 0   | 11  | 57   | 0  | 0  | 11  | 10   |
| 0   | 0   | 0    | 0  | 0  | 332 | 37   |
| 16  | 0   | 12   | 0  | 0  | 90  | 220  |
| 0   | 0   | 0    | 0  | 0  | 120 | 0    |
| 21  | 0   | 0    | 0  | 0  | 65  | 33   |
| 10  | 0   | 15   | 0  | 0  | 138 | 64   |
| 0   | 0   | 0    | 0  | 0  | 0   | 0    |
| 10  | 0   | 22   | 10 | 0  | 55  | 0    |
| 0   | 0   | 0    | 0  | 0  | 10  | 0    |
| 0   | 0   | 11   | 0  | 0  | 0   | 0    |
| 62  | 0   | 0    | 0  | 0  | 10  | 0    |
| 95  | 309 | 62   | 0  | 0  | 78  | 1501 |
| 15  | 0   | 0    | 0  | 0  | 84  | 64   |
| 13  | 0   | 12   | 0  | 0  | 0   | 121  |
| 43  | 147 | 50   | 0  | 0  | 78  | 677  |
| 0   | 0   | 0    | 0  | 0  | 0   | 0    |
| 11  | 0   | 102  | 0  | 0  | 33  | 0    |
| 0   | 18  | 81   | 0  | 0  | 28  | 11   |
| 86  | 79  | 227  | 0  | 0  | 448 | 217  |
| 0   | 0   | 0    | 0  | 0  | 0   | 0    |
| 0   | 0   | 0    | 0  | 0  | 10  | 0    |
| 0   | 0   | 0    | 0  | 0  | 15  | 0    |
| 0   | 0   | 0    | 0  | 0  | 0   | 0    |
| 0   | 0   | 0    | 0  | 0  | 11  | 0    |
| 461 | 195 | 1178 | 52 | 72 | 59  | 45   |
| 0   | 38  | 0    | 0  | 0  | 66  | 0    |
| 0   | 12  | 0    | 0  | 0  | 0   | 0    |
| 133 | 191 | 0    | 0  | 0  | 170 | 137  |
| 19  | 0   | 26   | 0  | 0  | 41  | 0    |
| 127 | 34  | 0    | 0  | 30 | 105 | 34   |
| 0   | 0   | 0    | 0  | 0  | 0   | 0    |
| 12  | 0   | 0    | 0  | 0  | 198 | 0    |
| 0   | 0   | 0    | 0  | 0  | 47  | 0    |
| 0   | 0   | 0    | 0  | 0  | 87  | 0    |
| 12  | 110 | 494  | 0  | 0  | 44  | 55   |
| 17  | 0   | 228  | 0  | 12 | 0   | 0    |
| 0   | 0   | 0    | 0  | 0  | 10  | 0    |
| 0   | 0   | 51   | 10 | 0  | 44  | 106  |
| 17  | 10  | 169  | 0  | 0  | 115 | 58   |
| 12  | 0   | 0    | 0  | 0  | 10  | 0    |
| 0   | 0   | 12   | 0  | 0  | 373 | 80   |
| 0   | 0   | 72   | 0  | 0  | 142 | 11   |
| 0   | 0   | 0    | 0  | 0  | 13  | 0    |

|     |    |     |    |    |     |     |
|-----|----|-----|----|----|-----|-----|
| 0   | 0  | 0   | 0  | 0  | 333 | 124 |
| 14  | 0  | 11  | 0  | 0  | 41  | 10  |
| 0   | 0  | 0   | 0  | 0  | 109 | 0   |
| 0   | 0  | 0   | 0  | 0  | 109 | 0   |
| 0   | 0  | 0   | 10 | 0  | 33  | 0   |
| 11  | 0  | 0   | 19 | 0  | 149 | 0   |
| 43  | 0  | 35  | 0  | 0  | 0   | 0   |
| 0   | 0  | 0   | 0  | 0  | 60  | 0   |
| 15  | 0  | 168 | 0  | 0  | 35  | 28  |
| 0   | 22 | 36  | 0  | 0  | 12  | 13  |
| 63  | 0  | 122 | 0  | 0  | 14  | 0   |
| 0   | 0  | 100 | 0  | 0  | 104 | 67  |
| 0   | 0  | 0   | 0  | 0  | 81  | 0   |
| 0   | 0  | 0   | 0  | 0  | 16  | 0   |
| 41  | 0  | 61  | 0  | 0  | 49  | 0   |
| 35  | 0  | 0   | 0  | 0  | 152 | 0   |
| 0   | 0  | 0   | 0  | 0  | 63  | 0   |
| 0   | 0  | 0   | 0  | 0  | 12  | 0   |
| 206 | 75 | 137 | 10 | 22 | 37  | 26  |
| 0   | 88 | 0   | 0  | 0  | 0   | 11  |
| 361 | 0  | 33  | 0  | 0  | 0   | 10  |
| 0   | 0  | 0   | 0  | 0  | 16  | 40  |
| 0   | 0  | 30  | 0  | 0  | 0   | 41  |
| 0   | 0  | 0   | 0  | 0  | 0   | 41  |
| 0   | 0  | 0   | 0  | 0  | 0   | 27  |
| 10  | 0  | 0   | 0  | 0  | 0   | 10  |
| 0   | 0  | 0   | 0  | 0  | 0   | 56  |
| 0   | 0  | 0   | 0  | 0  | 0   | 51  |
| 0   | 12 | 0   | 0  | 0  | 42  | 75  |
| 16  | 0  | 0   | 0  | 0  | 0   | 41  |
| 0   | 0  | 0   | 0  | 0  | 0   | 36  |
| 0   | 0  | 0   | 0  | 0  | 65  | 201 |
| 281 | 63 | 0   | 0  | 0  | 44  | 30  |
| 98  | 0  | 0   | 0  | 0  | 0   | 11  |
| 15  | 0  | 0   | 0  | 0  | 0   | 10  |
| 27  | 0  | 28  | 0  | 0  | 0   | 35  |
| 13  | 0  | 0   | 0  | 0  | 14  | 37  |
| 46  | 0  | 0   | 0  | 0  | 0   | 15  |
| 0   | 0  | 0   | 0  | 0  | 0   | 197 |
| 0   | 10 | 0   | 0  | 0  | 10  | 61  |
| 11  | 0  | 0   | 0  | 0  | 0   | 76  |
| 0   | 0  | 0   | 0  | 0  | 0   | 12  |
| 0   | 0  | 0   | 0  | 0  | 23  | 51  |
| 0   | 0  | 0   | 0  | 0  | 0   | 12  |
| 23  | 0  | 77  | 0  | 0  | 0   | 257 |
| 0   | 0  | 12  | 0  | 0  | 30  | 11  |

|     |     |     |   |    |    |     |
|-----|-----|-----|---|----|----|-----|
| 25  | 0   | 0   | 0 | 0  | 0  | 10  |
| 0   | 18  | 0   | 0 | 0  | 0  | 21  |
| 0   | 14  | 0   | 0 | 0  | 0  | 419 |
| 0   | 61  | 901 | 0 | 0  | 16 | 51  |
| 0   | 0   | 61  | 0 | 0  | 0  | 95  |
| 0   | 0   | 0   | 0 | 0  | 0  | 275 |
| 0   | 0   | 0   | 0 | 0  | 0  | 13  |
| 0   | 0   | 0   | 0 | 0  | 13 | 90  |
| 14  | 0   | 13  | 0 | 0  | 20 | 21  |
| 0   | 0   | 0   | 0 | 0  | 31 | 10  |
| 0   | 0   | 0   | 0 | 0  | 0  | 140 |
| 0   | 0   | 0   | 0 | 0  | 0  | 44  |
| 0   | 0   | 0   | 0 | 0  | 0  | 10  |
| 219 | 0   | 0   | 0 | 0  | 0  | 0   |
| 26  | 44  | 0   | 0 | 0  | 0  | 0   |
| 0   | 0   | 0   | 0 | 0  | 0  | 0   |
| 0   | 0   | 0   | 0 | 0  | 0  | 0   |
| 57  | 0   | 0   | 0 | 0  | 0  | 0   |
| 0   | 0   | 0   | 0 | 0  | 0  | 0   |
| 126 | 0   | 93  | 0 | 0  | 0  | 0   |
| 106 | 0   | 10  | 0 | 0  | 0  | 0   |
| 44  | 22  | 38  | 0 | 0  | 0  | 0   |
| 11  | 0   | 16  | 0 | 0  | 0  | 0   |
| 0   | 15  | 40  | 0 | 0  | 18 | 0   |
| 0   | 0   | 0   | 0 | 0  | 0  | 0   |
| 326 | 0   | 422 | 0 | 21 | 0  | 0   |
| 248 | 162 | 50  | 0 | 0  | 54 | 0   |
| 72  | 0   | 62  | 0 | 0  | 0  | 0   |
| 126 | 0   | 53  | 0 | 0  | 0  | 0   |
| 0   | 0   | 0   | 0 | 0  | 0  | 0   |
| 0   | 0   | 15  | 0 | 0  | 0  | 0   |
| 0   | 0   | 0   | 0 | 0  | 0  | 0   |
| 0   | 40  | 0   | 0 | 0  | 0  | 0   |
| 79  | 0   | 196 | 0 | 0  | 0  | 0   |
| 0   | 0   | 150 | 0 | 0  | 0  | 0   |
| 0   | 0   | 13  | 0 | 0  | 0  | 0   |
| 0   | 0   | 188 | 0 | 0  | 0  | 0   |
| 0   | 0   | 0   | 0 | 0  | 0  | 0   |
| 34  | 0   | 59  | 0 | 0  | 0  | 0   |
| 10  | 0   | 0   | 0 | 0  | 0  | 0   |
| 198 | 0   | 0   | 0 | 11 | 0  | 0   |
| 0   | 0   | 0   | 0 | 0  | 0  | 0   |
| 0   | 0   | 0   | 0 | 0  | 0  | 0   |
| 0   | 0   | 0   | 0 | 0  | 0  | 0   |
| 0   | 0   | 11  | 0 | 0  | 0  | 0   |
| 13  | 0   | 85  | 0 | 0  | 11 | 0   |

|     |     |     |    |    |    |   |
|-----|-----|-----|----|----|----|---|
| 50  | 0   | 113 | 0  | 0  | 0  | 0 |
| 0   | 0   | 292 | 0  | 20 | 0  | 0 |
| 0   | 0   | 0   | 0  | 0  | 0  | 0 |
| 13  | 0   | 77  | 0  | 0  | 0  | 0 |
| 12  | 0   | 119 | 0  | 0  | 0  | 0 |
| 0   | 0   | 0   | 0  | 0  | 0  | 0 |
| 0   | 0   | 0   | 0  | 0  | 11 | 0 |
| 25  | 0   | 0   | 0  | 0  | 10 | 0 |
| 41  | 0   | 0   | 0  | 0  | 73 | 0 |
| 311 | 0   | 0   | 0  | 0  | 58 | 0 |
| 0   | 0   | 0   | 0  | 0  | 0  | 0 |
| 94  | 0   | 42  | 0  | 0  | 0  | 0 |
| 11  | 0   | 0   | 0  | 0  | 0  | 0 |
| 0   | 0   | 0   | 0  | 0  | 0  | 0 |
| 0   | 0   | 0   | 0  | 0  | 0  | 0 |
| 0   | 0   | 0   | 0  | 0  | 0  | 0 |
| 0   | 36  | 30  | 0  | 0  | 0  | 0 |
| 0   | 0   | 0   | 0  | 0  | 0  | 0 |
| 92  | 0   | 10  | 0  | 0  | 0  | 0 |
| 0   | 0   | 0   | 0  | 0  | 0  | 0 |
| 0   | 0   | 0   | 0  | 0  | 0  | 0 |
| 0   | 11  | 0   | 0  | 0  | 0  | 0 |
| 0   | 0   | 0   | 0  | 0  | 0  | 0 |
| 0   | 0   | 0   | 0  | 0  | 0  | 0 |
| 0   | 0   | 0   | 0  | 0  | 0  | 0 |
| 0   | 0   | 88  | 0  | 0  | 0  | 0 |
| 0   | 0   | 0   | 0  | 0  | 0  | 0 |
| 120 | 351 | 484 | 0  | 39 | 0  | 0 |
| 0   | 0   | 0   | 0  | 0  | 0  | 0 |
| 31  | 10  | 444 | 0  | 36 | 0  | 0 |
| 0   | 0   | 24  | 0  | 0  | 0  | 0 |
| 0   | 0   | 0   | 0  | 0  | 0  | 0 |
| 0   | 0   | 0   | 0  | 0  | 0  | 0 |
| 21  | 0   | 61  | 0  | 0  | 0  | 0 |
| 0   | 0   | 0   | 0  | 0  | 0  | 0 |
| 11  | 0   | 0   | 0  | 0  | 0  | 0 |
| 0   | 0   | 0   | 0  | 0  | 0  | 0 |
| 0   | 0   | 0   | 10 | 0  | 11 | 0 |
| 0   | 0   | 0   | 0  | 0  | 0  | 0 |
| 0   | 0   | 0   | 0  | 0  | 0  | 0 |
| 0   | 0   | 0   | 0  | 0  | 0  | 0 |
| 0   | 0   | 0   | 0  | 0  | 0  | 0 |
| 0   | 0   | 0   | 0  | 0  | 27 | 0 |
| 0   | 0   | 0   | 0  | 0  | 0  | 0 |
| 0   | 0   | 0   | 0  | 0  | 47 | 0 |
| 0   | 0   | 0   | 0  | 0  | 78 | 0 |



|    |   |    |    |   |    |   |
|----|---|----|----|---|----|---|
| 0  | 0 | 0  | 0  | 0 | 12 | 0 |
| 0  | 0 | 0  | 70 | 0 | 34 | 0 |
| 0  | 0 | 0  | 0  | 0 | 0  | 0 |
| 0  | 0 | 0  | 0  | 0 | 0  | 0 |
| 0  | 0 | 0  | 0  | 0 | 0  | 0 |
| 0  | 0 | 0  | 0  | 0 | 0  | 0 |
| 0  | 0 | 0  | 0  | 0 | 10 | 0 |
| 0  | 0 | 11 | 0  | 0 | 30 | 0 |
| 0  | 0 | 0  | 0  | 0 | 0  | 0 |
| 0  | 0 | 0  | 0  | 0 | 11 | 0 |
| 0  | 0 | 0  | 0  | 0 | 0  | 0 |
| 0  | 0 | 0  | 0  | 0 | 14 | 0 |
| 0  | 0 | 0  | 0  | 0 | 0  | 0 |
| 0  | 0 | 0  | 0  | 0 | 0  | 0 |
| 0  | 0 | 0  | 0  | 0 | 0  | 0 |
| 0  | 0 | 21 | 0  | 0 | 10 | 0 |
| 0  | 0 | 0  | 0  | 0 | 24 | 0 |
| 0  | 0 | 0  | 0  | 0 | 0  | 0 |
| 0  | 0 | 0  | 0  | 0 | 0  | 0 |
| 0  | 0 | 0  | 0  | 0 | 0  | 0 |
| 0  | 0 | 0  | 0  | 0 | 0  | 0 |
| 0  | 0 | 0  | 0  | 0 | 0  | 0 |
| 0  | 0 | 0  | 0  | 0 | 0  | 0 |
| 0  | 0 | 0  | 0  | 0 | 0  | 0 |
| 0  | 0 | 0  | 0  | 0 | 0  | 0 |
| 0  | 0 | 0  | 0  | 0 | 0  | 0 |
| 0  | 0 | 0  | 0  | 0 | 10 | 0 |
| 10 | 0 | 0  | 0  | 0 | 0  | 0 |
| 0  | 0 | 0  | 0  | 0 | 0  | 0 |
| 0  | 0 | 37 | 0  | 0 | 0  | 0 |
| 0  | 0 | 0  | 0  | 0 | 0  | 0 |
| 33 | 0 | 12 | 0  | 0 | 0  | 0 |
| 0  | 0 | 0  | 0  | 0 | 30 | 0 |
| 0  | 0 | 0  | 0  | 0 | 10 | 0 |
| 0  | 0 | 0  | 0  | 0 | 0  | 0 |
| 0  | 0 | 0  | 0  | 0 | 0  | 0 |
| 0  | 0 | 0  | 0  | 0 | 0  | 0 |
| 0  | 0 | 0  | 0  | 0 | 0  | 0 |
| 0  | 0 | 0  | 0  | 0 | 13 | 0 |
| 0  | 0 | 0  | 0  | 0 | 32 | 0 |
| 0  | 0 | 0  | 0  | 0 | 0  | 0 |
| 0  | 0 | 0  | 0  | 0 | 0  | 0 |
| 0  | 0 | 0  | 10 | 0 | 0  | 0 |
| 0  | 0 | 0  | 0  | 0 | 0  | 0 |
| 23 | 0 | 0  | 0  | 0 | 0  | 0 |
| 0  | 0 | 0  | 0  | 0 | 0  | 0 |

|     |    |     |    |    |    |   |
|-----|----|-----|----|----|----|---|
| 0   | 0  | 0   | 0  | 0  | 0  | 0 |
| 0   | 0  | 0   | 0  | 0  | 0  | 0 |
| 113 | 0  | 11  | 0  | 0  | 0  | 0 |
| 224 | 13 | 10  | 0  | 0  | 0  | 0 |
| 0   | 0  | 0   | 0  | 0  | 0  | 0 |
| 0   | 0  | 0   | 0  | 0  | 0  | 0 |
| 0   | 0  | 0   | 0  | 0  | 0  | 0 |
| 0   | 0  | 0   | 0  | 0  | 0  | 0 |
| 0   | 0  | 0   | 0  | 0  | 0  | 0 |
| 0   | 0  | 0   | 0  | 0  | 0  | 0 |
| 0   | 0  | 0   | 0  | 0  | 0  | 0 |
| 0   | 0  | 0   | 0  | 0  | 0  | 0 |
| 0   | 0  | 0   | 0  | 0  | 0  | 0 |
| 0   | 0  | 0   | 0  | 0  | 0  | 0 |
| 0   | 0  | 0   | 0  | 0  | 0  | 0 |
| 39  | 0  | 49  | 0  | 0  | 0  | 0 |
| 14  | 0  | 0   | 0  | 0  | 0  | 0 |
| 0   | 0  | 10  | 0  | 0  | 0  | 0 |
| 0   | 0  | 0   | 0  | 0  | 0  | 0 |
| 22  | 10 | 0   | 0  | 0  | 0  | 0 |
| 0   | 0  | 22  | 0  | 0  | 0  | 0 |
| 24  | 0  | 21  | 0  | 0  | 0  | 0 |
| 48  | 0  | 0   | 0  | 0  | 0  | 0 |
| 561 | 0  | 12  | 0  | 10 | 0  | 0 |
| 0   | 0  | 0   | 0  | 0  | 0  | 0 |
| 0   | 0  | 0   | 0  | 0  | 20 | 0 |
| 0   | 0  | 0   | 0  | 0  | 0  | 0 |
| 38  | 0  | 32  | 0  | 0  | 0  | 0 |
| 0   | 0  | 0   | 0  | 0  | 0  | 0 |
| 0   | 0  | 0   | 0  | 0  | 0  | 0 |
| 28  | 0  | 69  | 0  | 0  | 0  | 0 |
| 0   | 0  | 0   | 0  | 0  | 0  | 0 |
| 10  | 0  | 25  | 0  | 0  | 0  | 0 |
| 0   | 0  | 0   | 0  | 0  | 0  | 0 |
| 31  | 0  | 0   | 0  | 0  | 0  | 0 |
| 0   | 0  | 0   | 0  | 0  | 0  | 0 |
| 10  | 0  | 0   | 15 | 0  | 14 | 0 |
| 0   | 0  | 0   | 0  | 0  | 0  | 0 |
| 0   | 0  | 0   | 0  | 0  | 0  | 0 |
| 21  | 0  | 126 | 0  | 0  | 14 | 0 |
| 0   | 0  | 0   | 0  | 0  | 0  | 0 |
| 0   | 0  | 0   | 0  | 0  | 0  | 0 |
| 280 | 29 | 236 | 11 | 0  | 0  | 0 |
| 0   | 0  | 28  | 0  | 0  | 0  | 0 |
| 0   | 0  | 0   | 0  | 0  | 0  | 0 |
| 0   | 0  | 90  | 0  | 0  | 0  | 0 |



|     |    |    |    |   |     |   |
|-----|----|----|----|---|-----|---|
| 0   | 0  | 31 | 0  | 0 | 0   | 0 |
| 108 | 0  | 52 | 0  | 0 | 0   | 0 |
| 10  | 73 | 0  | 0  | 0 | 17  | 0 |
| 0   | 0  | 0  | 0  | 0 | 10  | 0 |
| 0   | 0  | 0  | 0  | 0 | 0   | 0 |
| 0   | 0  | 0  | 0  | 0 | 0   | 0 |
| 0   | 0  | 0  | 0  | 0 | 0   | 0 |
| 0   | 0  | 0  | 0  | 0 | 0   | 0 |
| 0   | 0  | 0  | 0  | 0 | 0   | 0 |
| 0   | 0  | 0  | 0  | 0 | 0   | 0 |
| 0   | 0  | 0  | 0  | 0 | 0   | 0 |
| 13  | 0  | 0  | 0  | 0 | 21  | 0 |
| 0   | 0  | 0  | 0  | 0 | 0   | 0 |
| 33  | 0  | 0  | 0  | 0 | 0   | 0 |
| 37  | 0  | 0  | 0  | 0 | 67  | 0 |
| 10  | 0  | 0  | 0  | 0 | 121 | 0 |
| 14  | 11 | 0  | 0  | 0 | 0   | 0 |
| 0   | 0  | 0  | 0  | 0 | 0   | 0 |
| 16  | 0  | 0  | 0  | 0 | 0   | 0 |
| 34  | 0  | 0  | 0  | 0 | 0   | 0 |
| 0   | 0  | 0  | 0  | 0 | 0   | 0 |
| 14  | 0  | 0  | 0  | 0 | 22  | 0 |
| 0   | 0  | 31 | 0  | 0 | 0   | 0 |
| 0   | 0  | 30 | 0  | 0 | 0   | 0 |
| 0   | 0  | 0  | 0  | 0 | 0   | 0 |
| 0   | 0  | 21 | 0  | 0 | 18  | 0 |
| 0   | 0  | 0  | 0  | 0 | 0   | 0 |
| 0   | 0  | 0  | 0  | 0 | 0   | 0 |
| 0   | 0  | 0  | 0  | 0 | 0   | 0 |
| 0   | 0  | 0  | 0  | 0 | 22  | 0 |
| 66  | 0  | 0  | 28 | 0 | 0   | 0 |
| 0   | 68 | 0  | 0  | 0 | 0   | 0 |
| 0   | 0  | 13 | 0  | 0 | 0   | 0 |
| 13  | 0  | 0  | 0  | 0 | 0   | 0 |
| 11  | 0  | 0  | 0  | 0 | 0   | 0 |
| 0   | 0  | 0  | 0  | 0 | 0   | 0 |
| 0   | 0  | 0  | 0  | 0 | 0   | 0 |
| 13  | 0  | 11 | 0  | 0 | 12  | 0 |
| 0   | 0  | 0  | 0  | 0 | 0   | 0 |
| 0   | 0  | 0  | 0  | 0 | 0   | 0 |
| 0   | 0  | 0  | 0  | 0 | 0   | 0 |
| 0   | 0  | 0  | 0  | 0 | 0   | 0 |
| 0   | 0  | 0  | 0  | 0 | 0   | 0 |
| 0   | 0  | 0  | 0  | 0 | 0   | 0 |
| 0   | 0  | 0  | 0  | 0 | 0   | 0 |
| 0   | 0  | 51 | 0  | 0 | 0   | 0 |

|    |   |    |    |   |    |   |
|----|---|----|----|---|----|---|
| 0  | 0 | 0  | 0  | 0 | 11 | 0 |
| 0  | 0 | 0  | 0  | 0 | 0  | 0 |
| 0  | 0 | 0  | 0  | 0 | 0  | 0 |
| 0  | 0 | 0  | 0  | 0 | 0  | 0 |
| 0  | 0 | 0  | 0  | 0 | 31 | 0 |
| 0  | 0 | 0  | 0  | 0 | 0  | 0 |
| 0  | 0 | 0  | 0  | 0 | 0  | 0 |
| 0  | 0 | 11 | 0  | 0 | 0  | 0 |
| 27 | 0 | 0  | 0  | 0 | 0  | 0 |
| 0  | 0 | 0  | 0  | 0 | 0  | 0 |
| 12 | 0 | 0  | 0  | 0 | 0  | 0 |
| 0  | 0 | 0  | 0  | 0 | 0  | 0 |
| 30 | 0 | 0  | 0  | 0 | 0  | 0 |
| 0  | 0 | 0  | 0  | 0 | 0  | 0 |
| 0  | 0 | 0  | 0  | 0 | 0  | 0 |
| 0  | 0 | 0  | 0  | 0 | 0  | 0 |
| 0  | 0 | 0  | 0  | 0 | 27 | 0 |
| 0  | 0 | 0  | 0  | 0 | 0  | 0 |
| 0  | 0 | 0  | 0  | 0 | 0  | 0 |
| 0  | 0 | 55 | 0  | 0 | 0  | 0 |
| 25 | 0 | 57 | 11 | 0 | 43 | 0 |
| 0  | 0 | 0  | 0  | 0 | 0  | 0 |
| 0  | 0 | 0  | 0  | 0 | 0  | 0 |
| 0  | 0 | 0  | 0  | 0 | 0  | 0 |
| 0  | 0 | 0  | 0  | 0 | 0  | 0 |
| 0  | 0 | 0  | 0  | 0 | 0  | 0 |
| 0  | 0 | 0  | 0  | 0 | 0  | 0 |
| 0  | 0 | 0  | 0  | 0 | 0  | 0 |
| 0  | 0 | 0  | 0  | 0 | 0  | 0 |
| 0  | 0 | 0  | 0  | 0 | 0  | 0 |
| 0  | 0 | 0  | 0  | 0 | 0  | 0 |
| 0  | 0 | 0  | 0  | 0 | 0  | 0 |
| 0  | 0 | 0  | 0  | 0 | 0  | 0 |
| 0  | 0 | 11 | 0  | 0 | 0  | 0 |
| 0  | 0 | 0  | 0  | 0 | 0  | 0 |
| 0  | 0 | 30 | 0  | 0 | 0  | 0 |
| 0  | 0 | 21 | 0  | 0 | 0  | 0 |
| 0  | 0 | 52 | 0  | 0 | 0  | 0 |
| 0  | 0 | 0  | 0  | 0 | 10 | 0 |
| 0  | 0 | 80 | 0  | 0 | 0  | 0 |
| 0  | 0 | 0  | 0  | 0 | 0  | 0 |
| 0  | 0 | 0  | 0  | 0 | 0  | 0 |
| 0  | 0 | 0  | 0  | 0 | 0  | 0 |
| 0  | 0 | 17 | 0  | 0 | 0  | 0 |
| 0  | 0 | 32 | 0  | 0 | 0  | 0 |
| 0  | 0 | 0  | 0  | 0 | 0  | 0 |
| 0  | 0 | 0  | 0  | 0 | 0  | 0 |
| 0  | 0 | 0  | 0  | 0 | 0  | 0 |

|    |    |    |   |   |    |   |
|----|----|----|---|---|----|---|
| 0  | 0  | 0  | 0 | 0 | 0  | 0 |
| 0  | 0  | 0  | 0 | 0 | 0  | 0 |
| 0  | 0  | 0  | 0 | 0 | 0  | 0 |
| 0  | 0  | 0  | 0 | 0 | 0  | 0 |
| 0  | 0  | 13 | 0 | 0 | 0  | 0 |
| 41 | 0  | 0  | 0 | 0 | 0  | 0 |
| 0  | 0  | 0  | 0 | 0 | 0  | 0 |
| 0  | 0  | 0  | 0 | 0 | 0  | 0 |
| 0  | 0  | 0  | 0 | 0 | 0  | 0 |
| 65 | 13 | 0  | 0 | 0 | 0  | 0 |
| 0  | 0  | 0  | 0 | 0 | 0  | 0 |
| 0  | 0  | 11 | 0 | 0 | 0  | 0 |
| 0  | 0  | 0  | 0 | 0 | 0  | 0 |
| 0  | 0  | 0  | 0 | 0 | 0  | 0 |
| 0  | 0  | 0  | 0 | 0 | 0  | 0 |
| 0  | 0  | 0  | 0 | 0 | 0  | 0 |
| 55 | 0  | 0  | 0 | 0 | 0  | 0 |
| 0  | 0  | 0  | 0 | 0 | 0  | 0 |
| 0  | 0  | 0  | 0 | 0 | 0  | 0 |
| 0  | 0  | 0  | 0 | 0 | 0  | 0 |
| 0  | 0  | 0  | 0 | 0 | 0  | 0 |
| 0  | 0  | 0  | 0 | 0 | 0  | 0 |
| 0  | 0  | 0  | 0 | 0 | 0  | 0 |
| 0  | 0  | 0  | 0 | 0 | 0  | 0 |
| 0  | 0  | 0  | 0 | 0 | 0  | 0 |
| 0  | 0  | 31 | 0 | 0 | 0  | 0 |
| 0  | 0  | 0  | 0 | 0 | 0  | 0 |
| 0  | 0  | 0  | 0 | 0 | 0  | 0 |
| 0  | 0  | 0  | 0 | 0 | 0  | 0 |
| 0  | 0  | 0  | 0 | 0 | 0  | 0 |
| 0  | 0  | 0  | 0 | 0 | 0  | 0 |
| 0  | 0  | 0  | 0 | 0 | 29 | 0 |
| 13 | 0  | 47 | 0 | 0 | 0  | 0 |
| 0  | 0  | 0  | 0 | 0 | 0  | 0 |
| 0  | 0  | 0  | 0 | 0 | 0  | 0 |
| 0  | 0  | 0  | 0 | 0 | 0  | 0 |
| 10 | 0  | 0  | 0 | 0 | 0  | 0 |
| 34 | 0  | 0  | 0 | 0 | 0  | 0 |
| 0  | 0  | 0  | 0 | 0 | 0  | 0 |
| 0  | 0  | 0  | 0 | 0 | 0  | 0 |
| 0  | 0  | 0  | 0 | 0 | 0  | 0 |
| 0  | 0  | 0  | 0 | 0 | 0  | 0 |
| 0  | 0  | 0  | 0 | 0 | 0  | 0 |
| 11 | 0  | 0  | 0 | 0 | 0  | 0 |
| 0  | 0  | 0  | 0 | 0 | 0  | 0 |
| 0  | 0  | 0  | 0 | 0 | 0  | 0 |
| 0  | 0  | 0  | 0 | 0 | 0  | 0 |
| 0  | 0  | 0  | 0 | 0 | 0  | 0 |



|     |   |    |   |   |    |   |
|-----|---|----|---|---|----|---|
| 0   | 0 | 28 | 0 | 0 | 0  | 0 |
| 0   | 0 | 0  | 0 | 0 | 0  | 0 |
| 0   | 0 | 0  | 0 | 0 | 0  | 0 |
| 0   | 0 | 0  | 0 | 0 | 0  | 0 |
| 0   | 0 | 0  | 0 | 0 | 0  | 0 |
| 0   | 0 | 0  | 0 | 0 | 0  | 0 |
| 0   | 0 | 0  | 0 | 0 | 0  | 0 |
| 0   | 0 | 0  | 0 | 0 | 0  | 0 |
| 0   | 0 | 0  | 0 | 0 | 0  | 0 |
| 16  | 0 | 0  | 0 | 0 | 0  | 0 |
| 0   | 0 | 0  | 0 | 0 | 10 | 0 |
| 0   | 0 | 0  | 0 | 0 | 0  | 0 |
| 0   | 0 | 0  | 0 | 0 | 0  | 0 |
| 0   | 0 | 0  | 0 | 0 | 0  | 0 |
| 0   | 0 | 0  | 0 | 0 | 0  | 0 |
| 0   | 0 | 0  | 0 | 0 | 13 | 0 |
| 0   | 0 | 0  | 0 | 0 | 10 | 0 |
| 0   | 0 | 0  | 0 | 0 | 0  | 0 |
| 0   | 0 | 0  | 0 | 0 | 0  | 0 |
| 0   | 0 | 0  | 0 | 0 | 23 | 0 |
| 0   | 0 | 0  | 0 | 0 | 0  | 0 |
| 0   | 0 | 0  | 0 | 0 | 0  | 0 |
| 0   | 0 | 0  | 0 | 0 | 0  | 0 |
| 0   | 0 | 0  | 0 | 0 | 31 | 0 |
| 208 | 0 | 0  | 0 | 0 | 0  | 0 |
| 0   | 0 | 0  | 0 | 0 | 0  | 0 |
| 0   | 0 | 0  | 0 | 0 | 0  | 0 |
| 0   | 0 | 0  | 0 | 0 | 0  | 0 |
| 0   | 0 | 0  | 0 | 0 | 0  | 0 |
| 0   | 0 | 0  | 0 | 0 | 0  | 0 |
| 0   | 0 | 0  | 0 | 0 | 0  | 0 |
| 0   | 0 | 0  | 0 | 0 | 0  | 0 |
| 0   | 0 | 0  | 0 | 0 | 0  | 0 |
| 0   | 0 | 0  | 0 | 0 | 0  | 0 |
| 0   | 0 | 0  | 0 | 0 | 13 | 0 |
| 15  | 0 | 19 | 0 | 0 | 0  | 0 |
| 0   | 0 | 0  | 0 | 0 | 0  | 0 |
| 0   | 0 | 0  | 0 | 0 | 22 | 0 |
| 28  | 0 | 0  | 0 | 0 | 0  | 0 |
| 0   | 0 | 0  | 0 | 0 | 0  | 0 |
| 0   | 0 | 0  | 0 | 0 | 0  | 0 |
| 0   | 0 | 0  | 0 | 0 | 0  | 0 |
| 0   | 0 | 0  | 0 | 0 | 0  | 0 |
| 58  | 0 | 0  | 0 | 0 | 0  | 0 |
| 0   | 0 | 0  | 0 | 0 | 0  | 0 |
| 0   | 0 | 0  | 0 | 0 | 0  | 0 |

|    |   |     |   |   |    |   |
|----|---|-----|---|---|----|---|
| 0  | 0 | 0   | 0 | 0 | 0  | 0 |
| 0  | 0 | 0   | 0 | 0 | 0  | 0 |
| 0  | 0 | 0   | 0 | 0 | 0  | 0 |
| 0  | 0 | 0   | 0 | 0 | 0  | 0 |
| 0  | 0 | 0   | 0 | 0 | 14 | 0 |
| 0  | 0 | 0   | 0 | 0 | 0  | 0 |
| 0  | 0 | 0   | 0 | 0 | 0  | 0 |
| 26 | 0 | 0   | 0 | 0 | 0  | 0 |
| 0  | 0 | 0   | 0 | 0 | 0  | 0 |
| 0  | 0 | 0   | 0 | 0 | 0  | 0 |
| 0  | 0 | 0   | 0 | 0 | 13 | 0 |
| 0  | 0 | 0   | 0 | 0 | 0  | 0 |
| 0  | 0 | 0   | 0 | 0 | 0  | 0 |
| 11 | 0 | 10  | 0 | 0 | 0  | 0 |
| 0  | 0 | 16  | 0 | 0 | 0  | 0 |
| 0  | 0 | 31  | 0 | 0 | 11 | 0 |
| 56 | 0 | 31  | 0 | 0 | 0  | 0 |
| 0  | 0 | 33  | 0 | 0 | 0  | 0 |
| 23 | 0 | 48  | 0 | 0 | 0  | 0 |
| 0  | 0 | 207 | 0 | 0 | 0  | 0 |
| 0  | 0 | 25  | 0 | 0 | 0  | 0 |
| 0  | 0 | 13  | 0 | 0 | 0  | 0 |
| 0  | 0 | 15  | 0 | 0 | 0  | 0 |
| 0  | 0 | 45  | 0 | 0 | 0  | 0 |
| 29 | 0 | 27  | 0 | 0 | 24 | 0 |
| 0  | 0 | 33  | 0 | 0 | 0  | 0 |
| 0  | 0 | 52  | 0 | 0 | 0  | 0 |
| 22 | 0 | 40  | 0 | 0 | 49 | 0 |
| 0  | 0 | 31  | 0 | 0 | 0  | 0 |
| 0  | 0 | 25  | 0 | 0 | 0  | 0 |
| 0  | 0 | 11  | 0 | 0 | 0  | 0 |
| 0  | 0 | 10  | 0 | 0 | 0  | 0 |
| 23 | 0 | 11  | 0 | 0 | 0  | 0 |
| 0  | 0 | 30  | 0 | 0 | 0  | 0 |
| 0  | 0 | 29  | 0 | 0 | 0  | 0 |
| 0  | 0 | 33  | 0 | 0 | 0  | 0 |
| 0  | 0 | 16  | 0 | 0 | 0  | 0 |
| 26 | 0 | 164 | 0 | 0 | 0  | 0 |
| 0  | 0 | 10  | 0 | 0 | 0  | 0 |
| 0  | 0 | 18  | 0 | 0 | 0  | 0 |
| 47 | 0 | 77  | 0 | 0 | 10 | 0 |
| 0  | 0 | 39  | 0 | 0 | 0  | 0 |
| 0  | 0 | 40  | 0 | 0 | 0  | 0 |
| 0  | 0 | 29  | 0 | 0 | 0  | 0 |
| 0  | 0 | 63  | 0 | 0 | 0  | 0 |
| 0  | 0 | 10  | 0 | 0 | 0  | 0 |















|    |   |   |   |   |    |   |
|----|---|---|---|---|----|---|
| 0  | 0 | 0 | 0 | 0 | 0  | 0 |
| 0  | 0 | 0 | 0 | 0 | 10 | 0 |
| 0  | 0 | 0 | 0 | 0 | 16 | 0 |
| 0  | 0 | 0 | 0 | 0 | 0  | 0 |
| 0  | 0 | 0 | 0 | 0 | 0  | 0 |
| 0  | 0 | 0 | 0 | 0 | 0  | 0 |
| 0  | 0 | 0 | 0 | 0 | 0  | 0 |
| 0  | 0 | 0 | 0 | 0 | 33 | 0 |
| 0  | 0 | 0 | 0 | 0 | 0  | 0 |
| 0  | 0 | 0 | 0 | 0 | 0  | 0 |
| 0  | 0 | 0 | 0 | 0 | 0  | 0 |
| 0  | 0 | 0 | 0 | 0 | 0  | 0 |
| 0  | 0 | 0 | 0 | 0 | 0  | 0 |
| 0  | 0 | 0 | 0 | 0 | 0  | 0 |
| 0  | 0 | 0 | 0 | 0 | 0  | 0 |
| 0  | 0 | 0 | 0 | 0 | 0  | 0 |
| 0  | 0 | 0 | 0 | 0 | 0  | 0 |
| 0  | 0 | 0 | 0 | 0 | 14 | 0 |
| 0  | 0 | 0 | 0 | 0 | 0  | 0 |
| 0  | 0 | 0 | 0 | 0 | 0  | 0 |
| 0  | 0 | 0 | 0 | 0 | 0  | 0 |
| 0  | 0 | 0 | 0 | 0 | 0  | 0 |
| 0  | 0 | 0 | 0 | 0 | 0  | 0 |
| 0  | 0 | 0 | 0 | 0 | 0  | 0 |
| 0  | 0 | 0 | 0 | 0 | 0  | 0 |
| 0  | 0 | 0 | 0 | 0 | 0  | 0 |
| 0  | 0 | 0 | 0 | 0 | 0  | 0 |
| 0  | 0 | 0 | 0 | 0 | 0  | 0 |
| 0  | 0 | 0 | 0 | 0 | 0  | 0 |
| 0  | 0 | 0 | 0 | 0 | 0  | 0 |
| 0  | 0 | 0 | 0 | 0 | 0  | 0 |
| 0  | 0 | 0 | 0 | 0 | 12 | 0 |
| 0  | 0 | 0 | 0 | 0 | 0  | 0 |
| 0  | 0 | 0 | 0 | 0 | 0  | 0 |
| 0  | 0 | 0 | 0 | 0 | 0  | 0 |
| 0  | 0 | 0 | 0 | 0 | 0  | 0 |
| 0  | 0 | 0 | 0 | 0 | 0  | 0 |
| 0  | 0 | 0 | 0 | 0 | 0  | 0 |
| 22 | 0 | 0 | 0 | 0 | 0  | 0 |
| 0  | 0 | 0 | 0 | 0 | 23 | 0 |
| 0  | 0 | 0 | 0 | 0 | 0  | 0 |
| 0  | 0 | 0 | 0 | 0 | 0  | 0 |
| 0  | 0 | 0 | 0 | 0 | 0  | 0 |
| 0  | 0 | 0 | 0 | 0 | 13 | 0 |
| 0  | 0 | 0 | 0 | 0 | 0  | 0 |
| 0  | 0 | 0 | 0 | 0 | 0  | 0 |
| 0  | 0 | 0 | 0 | 0 | 0  | 0 |
| 0  | 0 | 0 | 0 | 0 | 0  | 0 |
| 0  | 0 | 0 | 0 | 0 | 0  | 0 |























[illegible]



| PH_348 | UC_242 | UC_249 | UC_261 | UC_273 | UC_280 | UC_282 |
|--------|--------|--------|--------|--------|--------|--------|
| 0      | 90     | 0      | 0      | 0      | 0      | 0      |
| 0      | 0      | 28     | 13     | 0      | 0      | 0      |
| 0      | 168    | 0      | 0      | 0      | 14     | 10     |
| 81     | 111    | 0      | 0      | 0      | 32     | 0      |
| 88     | 80     | 0      | 0      | 0      | 0      | 0      |
| 0      | 379    | 0      | 0      | 0      | 0      | 0      |
| 11     | 162    | 0      | 0      | 0      | 0      | 0      |
| 0      | 12     | 0      | 0      | 0      | 0      | 0      |
| 0      | 27     | 13     | 0      | 14     | 309    | 0      |
| 275    | 205    | 34     | 53     | 47     | 301    | 0      |
| 0      | 10     | 0      | 0      | 25     | 0      | 0      |
| 0      | 0      | 0      | 0      | 0      | 0      | 0      |
| 0      | 43     | 0      | 0      | 0      | 0      | 0      |
| 0      | 0      | 0      | 0      | 0      | 0      | 0      |
| 0      | 12     | 0      | 0      | 0      | 0      | 0      |
| 29     | 0      | 11     | 0      | 0      | 35     | 17     |
| 552    | 858    | 205    | 704    | 15     | 853    | 43     |
| 124    | 81     | 0      | 0      | 0      | 0      | 0      |
| 0      | 11     | 29     | 22     | 0      | 70     | 0      |
| 102    | 24     | 0      | 0      | 0      | 71     | 0      |
| 0      | 0      | 0      | 0      | 0      | 12     | 0      |
| 0      | 0      | 0      | 0      | 0      | 0      | 33     |
| 91     | 12     | 0      | 0      | 0      | 11     | 0      |
| 0      | 0      | 0      | 0      | 0      | 0      | 0      |
| 4899   | 882    | 754    | 1304   | 190    | 195    | 335    |
| 162    | 514    | 43     | 381    | 160    | 121    | 152    |
| 211    | 170    | 28     | 439    | 0      | 14     | 11     |
| 90     | 68     | 23     | 168    | 21     | 19     | 33     |
| 559    | 146    | 53     | 491    | 54     | 65     | 60     |
| 0      | 36     | 11     | 0      | 0      | 41     | 65     |
| 0      | 13     | 19     | 16     | 0      | 0      | 0      |
| 0      | 22     | 0      | 11     | 0      | 0      | 0      |
| 0      | 1345   | 1041   | 1666   | 167    | 1239   | 295    |
| 0      | 12     | 0      | 0      | 0      | 0      | 0      |
| 248    | 0      | 0      | 0      | 0      | 0      | 0      |
| 10     | 0      | 26     | 0      | 0      | 0      | 0      |
| 10     | 0      | 0      | 0      | 0      | 33     | 0      |
| 122    | 507    | 56     | 110    | 0      | 161    | 0      |
| 35     | 40     | 22     | 56     | 0      | 24     | 31     |
| 437    | 1699   | 550    | 1689   | 326    | 869    | 178    |
| 0      | 55     | 97     | 132    | 0      | 168    | 12     |

|      |      |     |     |     |     |     |
|------|------|-----|-----|-----|-----|-----|
| 0    | 43   | 68  | 157 | 0   | 109 | 0   |
| 95   | 29   | 26  | 58  | 0   | 39  | 11  |
| 33   | 62   | 0   | 42  | 0   | 20  | 11  |
| 1937 | 2282 | 60  | 921 | 141 | 40  | 38  |
| 387  | 205  | 0   | 251 | 0   | 0   | 0   |
| 0    | 12   | 0   | 0   | 14  | 0   | 0   |
| 0    | 153  | 0   | 21  | 0   | 0   | 0   |
| 0    | 15   | 0   | 27  | 51  | 0   | 0   |
| 0    | 36   | 0   | 0   | 0   | 0   | 0   |
| 0    | 0    | 0   | 22  | 55  | 0   | 0   |
| 0    | 0    | 0   | 0   | 0   | 0   | 0   |
| 0    | 10   | 0   | 0   | 0   | 0   | 0   |
| 0    | 126  | 0   | 148 | 13  | 10  | 0   |
| 0    | 0    | 0   | 0   | 0   | 0   | 0   |
| 0    | 0    | 0   | 0   | 0   | 0   | 0   |
| 0    | 0    | 17  | 23  | 52  | 0   | 0   |
| 0    | 41   | 0   | 0   | 0   | 0   | 0   |
| 412  | 496  | 268 | 264 | 191 | 582 | 182 |
| 190  | 149  | 0   | 94  | 0   | 0   | 0   |
| 0    | 0    | 0   | 0   | 47  | 44  | 11  |
| 0    | 0    | 0   | 0   | 0   | 0   | 0   |
| 0    | 0    | 0   | 0   | 0   | 0   | 0   |
| 0    | 0    | 0   | 0   | 0   | 0   | 0   |
| 0    | 70   | 0   | 0   | 0   | 0   | 0   |
| 0    | 0    | 0   | 0   | 0   | 0   | 0   |
| 0    | 81   | 0   | 0   | 0   | 0   | 0   |
| 0    | 13   | 0   | 0   | 0   | 0   | 0   |
| 13   | 33   | 0   | 0   | 0   | 0   | 0   |
| 0    | 0    | 0   | 0   | 0   | 0   | 0   |
| 0    | 43   | 0   | 10  | 0   | 0   | 0   |
| 0    | 250  | 22  | 67  | 173 | 0   | 0   |
| 179  | 3196 | 121 | 536 | 323 | 192 | 60  |
| 0    | 98   | 0   | 0   | 0   | 118 | 0   |
| 0    | 35   | 0   | 16  | 0   | 0   | 0   |
| 0    | 0    | 0   | 0   | 0   | 0   | 0   |
| 0    | 28   | 0   | 0   | 0   | 0   | 0   |
| 0    | 35   | 0   | 10  | 0   | 0   | 0   |
| 0    | 120  | 0   | 0   | 0   | 0   | 0   |
| 0    | 50   | 0   | 0   | 0   | 0   | 0   |
| 0    | 0    | 0   | 0   | 0   | 0   | 0   |
| 0    | 69   | 49  | 11  | 66  | 0   | 0   |
| 0    | 132  | 0   | 0   | 0   | 0   | 0   |
| 0    | 0    | 0   | 0   | 0   | 0   | 0   |
| 0    | 17   | 0   | 0   | 0   | 0   | 0   |
| 0    | 128  | 26  | 81  | 133 | 0   | 11  |
| 88   | 1394 | 160 | 317 | 397 | 153 | 73  |

|       |      |     |      |      |       |     |
|-------|------|-----|------|------|-------|-----|
| 0     | 0    | 0   | 0    | 0    | 0     | 0   |
| 230   | 478  | 11  | 16   | 0    | 11    | 0   |
| 0     | 59   | 0   | 27   | 52   | 0     | 0   |
| 0     | 0    | 0   | 0    | 0    | 0     | 0   |
| 52    | 1499 | 74  | 476  | 302  | 29    | 45  |
| 0     | 103  | 38  | 0    | 94   | 241   | 0   |
| 0     | 0    | 0   | 0    | 0    | 0     | 0   |
| 0     | 0    | 0   | 0    | 0    | 0     | 0   |
| 0     | 0    | 0   | 0    | 0    | 0     | 0   |
| 0     | 41   | 0   | 0    | 0    | 26    | 0   |
| 36    | 234  | 0   | 15   | 0    | 48    | 0   |
| 0     | 59   | 0   | 0    | 0    | 12    | 0   |
| 2854  | 4197 | 505 | 1066 | 1547 | 12196 | 108 |
| 0     | 0    | 0   | 0    | 0    | 88    | 0   |
| 64    | 555  | 87  | 151  | 427  | 1073  | 0   |
| 0     | 18   | 0   | 32   | 0    | 0     | 0   |
| 104   | 0    | 0   | 0    | 0    | 0     | 0   |
| 0     | 64   | 0   | 10   | 10   | 0     | 0   |
| 0     | 41   | 0   | 10   | 0    | 222   | 0   |
| 0     | 24   | 0   | 14   | 0    | 0     | 0   |
| 0     | 0    | 0   | 0    | 0    | 0     | 0   |
| 0     | 10   | 0   | 0    | 0    | 26    | 0   |
| 39    | 53   | 0   | 40   | 0    | 0     | 0   |
| 0     | 93   | 74  | 12   | 67   | 479   | 0   |
| 0     | 94   | 59  | 0    | 235  | 8585  | 14  |
| 10    | 211  | 35  | 44   | 165  | 945   | 0   |
| 0     | 104  | 0   | 13   | 41   | 356   | 0   |
| 0     | 0    | 0   | 0    | 0    | 0     | 0   |
| 11    | 14   | 0   | 19   | 37   | 138   | 0   |
| 191   | 359  | 347 | 191  | 476  | 5888  | 28  |
| 125   | 168  | 0   | 0    | 0    | 32    | 0   |
| 0     | 0    | 0   | 0    | 0    | 190   | 0   |
| 75    | 14   | 0   | 0    | 0    | 34    | 0   |
| 297   | 31   | 0   | 39   | 0    | 153   | 0   |
| 0     | 0    | 0   | 0    | 0    | 0     | 0   |
| 0     | 0    | 0   | 0    | 11   | 139   | 0   |
| 0     | 11   | 24  | 0    | 71   | 190   | 0   |
| 0     | 55   | 42  | 17   | 189  | 547   | 0   |
| 0     | 0    | 0   | 0    | 15   | 174   | 0   |
| 25    | 380  | 106 | 132  | 256  | 1564  | 20  |
| 0     | 29   | 10  | 10   | 28   | 148   | 0   |
| 0     | 42   | 0   | 18   | 12   | 68    | 0   |
| 0     | 63   | 0   | 38   | 35   | 0     | 0   |
| 35016 | 2832 | 215 | 1152 | 496  | 818   | 134 |
| 292   | 25   | 0   | 21   | 0    | 0     | 0   |
| 1364  | 238  | 78  | 163  | 294  | 115   | 110 |

|     |      |     |     |      |      |     |
|-----|------|-----|-----|------|------|-----|
| 85  | 0    | 0   | 0   | 0    | 0    | 11  |
| 54  | 254  | 0   | 0   | 0    | 12   | 0   |
| 175 | 377  | 105 | 39  | 0    | 152  | 25  |
| 79  | 1081 | 102 | 597 | 349  | 103  | 92  |
| 0   | 34   | 0   | 28  | 0    | 0    | 0   |
| 0   | 254  | 0   | 109 | 25   | 17   | 0   |
| 0   | 0    | 0   | 0   | 0    | 0    | 0   |
| 0   | 31   | 0   | 12  | 11   | 0    | 0   |
| 0   | 0    | 0   | 0   | 39   | 0    | 0   |
| 0   | 0    | 0   | 0   | 0    | 0    | 0   |
| 27  | 183  | 13  | 58  | 42   | 0    | 0   |
| 223 | 34   | 32  | 0   | 0    | 54   | 27  |
| 0   | 0    | 0   | 0   | 0    | 0    | 0   |
| 0   | 49   | 15  | 0   | 0    | 44   | 0   |
| 0   | 167  | 25  | 25  | 0    | 97   | 13  |
| 0   | 31   | 0   | 0   | 0    | 0    | 0   |
| 0   | 134  | 0   | 36  | 0    | 0    | 0   |
| 0   | 0    | 0   | 0   | 0    | 0    | 0   |
| 0   | 0    | 0   | 0   | 0    | 0    | 0   |
| 0   | 0    | 0   | 0   | 66   | 46   | 23  |
| 0   | 30   | 41  | 0   | 151  | 755  | 0   |
| 0   | 0    | 0   | 0   | 0    | 40   | 0   |
| 47  | 228  | 174 | 97  | 94   | 854  | 0   |
| 0   | 10   | 0   | 0   | 0    | 0    | 0   |
| 0   | 30   | 76  | 0   | 29   | 456  | 0   |
| 54  | 233  | 12  | 21  | 33   | 85   | 45  |
| 57  | 371  | 11  | 10  | 11   | 91   | 0   |
| 472 | 227  | 10  | 113 | 15   | 816  | 13  |
| 0   | 49   | 0   | 0   | 0    | 142  | 0   |
| 29  | 32   | 0   | 0   | 0    | 116  | 0   |
| 0   | 108  | 0   | 0   | 0    | 0    | 0   |
| 267 | 54   | 0   | 0   | 0    | 42   | 0   |
| 24  | 314  | 0   | 0   | 11   | 152  | 0   |
| 11  | 38   | 0   | 0   | 0    | 295  | 0   |
| 63  | 114  | 15  | 0   | 0    | 44   | 0   |
| 0   | 134  | 12  | 133 | 40   | 0    | 10  |
| 0   | 41   | 20  | 33  | 26   | 0    | 10  |
| 0   | 0    | 0   | 0   | 0    | 0    | 0   |
| 0   | 0    | 0   | 0   | 0    | 0    | 0   |
| 0   | 0    | 0   | 0   | 0    | 0    | 0   |
| 10  | 265  | 40  | 0   | 3520 | 107  | 0   |
| 0   | 0    | 0   | 0   | 0    | 0    | 0   |
| 0   | 0    | 18  | 10  | 10   | 0    | 0   |
| 0   | 0    | 0   | 0   | 0    | 0    | 0   |
| 86  | 413  | 399 | 0   | 191  | 208  | 293 |
| 274 | 442  | 444 | 45  | 226  | 1008 | 479 |

|      |       |      |      |      |      |      |
|------|-------|------|------|------|------|------|
| 30   | 205   | 1250 | 0    | 533  | 748  | 1399 |
| 47   | 1884  | 433  | 0    | 2237 | 113  | 78   |
| 3475 | 9018  | 4521 | 465  | 2706 | 1790 | 2978 |
| 845  | 12189 | 302  | 0    | 707  | 9987 | 50   |
| 0    | 81    | 0    | 38   | 0    | 0    | 0    |
| 296  | 201   | 51   | 0    | 58   | 564  | 29   |
| 126  | 399   | 78   | 60   | 330  | 900  | 0    |
| 0    | 35    | 0    | 0    | 10   | 161  | 0    |
| 0    | 0     | 0    | 0    | 0    | 0    | 11   |
| 0    | 0     | 0    | 0    | 0    | 0    | 0    |
| 0    | 13    | 0    | 0    | 0    | 0    | 0    |
| 0    | 0     | 0    | 0    | 0    | 0    | 0    |
| 42   | 0     | 0    | 0    | 0    | 11   | 0    |
| 920  | 1033  | 16   | 95   | 26   | 649  | 0    |
| 0    | 0     | 0    | 0    | 0    | 0    | 0    |
| 0    | 224   | 49   | 173  | 134  | 0    | 23   |
| 0    | 47    | 0    | 0    | 0    | 0    | 0    |
| 19   | 102   | 0    | 0    | 0    | 0    | 0    |
| 0    | 0     | 0    | 0    | 0    | 0    | 0    |
| 0    | 0     | 0    | 0    | 0    | 0    | 0    |
| 0    | 0     | 0    | 0    | 0    | 0    | 0    |
| 57   | 7106  | 943  | 1512 | 258  | 183  | 903  |
| 0    | 0     | 0    | 18   | 0    | 0    | 0    |
| 0    | 0     | 0    | 0    | 0    | 0    | 0    |
| 0    | 0     | 0    | 0    | 0    | 0    | 0    |
| 74   | 0     | 0    | 0    | 0    | 10   | 0    |
| 0    | 0     | 49   | 0    | 0    | 79   | 11   |
| 0    | 0     | 0    | 0    | 0    | 0    | 0    |
| 0    | 28    | 0    | 0    | 0    | 0    | 0    |
| 0    | 0     | 0    | 0    | 0    | 0    | 0    |
| 0    | 0     | 0    | 0    | 0    | 0    | 0    |
| 0    | 0     | 0    | 0    | 0    | 0    | 0    |
| 0    | 0     | 0    | 0    | 0    | 0    | 0    |
| 0    | 0     | 0    | 0    | 0    | 0    | 0    |
| 0    | 0     | 0    | 0    | 0    | 0    | 11   |
| 17   | 0     | 0    | 0    | 0    | 11   | 0    |
| 873  | 2193  | 1129 | 871  | 1854 | 1883 | 569  |
| 296  | 830   | 984  | 321  | 3835 | 6285 | 128  |
| 0    | 10    | 0    | 0    | 166  | 152  | 27   |
| 0    | 0     | 0    | 0    | 0    | 0    | 0    |
| 30   | 0     | 0    | 0    | 0    | 0    | 0    |
| 0    | 480   | 90   | 233  | 123  | 1006 | 57   |
| 0    | 29    | 53   | 0    | 116  | 2163 | 0    |
| 0    | 0     | 10   | 0    | 58   | 981  | 0    |
| 0    | 0     | 0    | 49   | 0    | 0    | 0    |
| 0    | 282   | 38   | 658  | 28   | 0    | 41   |

|     |      |     |     |      |      |     |
|-----|------|-----|-----|------|------|-----|
| 0   | 142  | 12  | 252 | 41   | 0    | 0   |
| 0   | 246  | 55  | 250 | 160  | 23   | 63  |
| 201 | 0    | 25  | 16  | 0    | 137  | 23  |
| 0   | 10   | 12  | 0   | 0    | 32   | 26  |
| 0   | 12   | 39  | 0   | 39   | 2057 | 0   |
| 137 | 485  | 464 | 112 | 1129 | 3010 | 138 |
| 13  | 234  | 29  | 37  | 151  | 1286 | 0   |
| 0   | 34   | 0   | 0   | 423  | 0    | 0   |
| 0   | 33   | 0   | 0   | 0    | 0    | 0   |
| 0   | 0    | 0   | 0   | 0    | 0    | 0   |
| 0   | 10   | 0   | 0   | 77   | 0    | 0   |
| 0   | 0    | 0   | 0   | 0    | 0    | 0   |
| 0   | 16   | 0   | 0   | 0    | 0    | 0   |
| 45  | 103  | 24  | 0   | 519  | 2702 | 0   |
| 49  | 75   | 0   | 50  | 0    | 0    | 0   |
| 0   | 0    | 0   | 0   | 0    | 0    | 0   |
| 0   | 0    | 0   | 0   | 13   | 0    | 0   |
| 0   | 26   | 0   | 0   | 0    | 0    | 0   |
| 238 | 107  | 32  | 88  | 135  | 44   | 76  |
| 108 | 0    | 0   | 0   | 0    | 0    | 0   |
| 0   | 0    | 25  | 0   | 0    | 0    | 0   |
| 0   | 0    | 28  | 0   | 0    | 30   | 0   |
| 0   | 108  | 182 | 22  | 266  | 110  | 0   |
| 0   | 0    | 39  | 0   | 0    | 0    | 0   |
| 694 | 492  | 843 | 469 | 475  | 1108 | 128 |
| 0   | 0    | 0   | 22  | 55   | 1054 | 0   |
| 0   | 0    | 0   | 0   | 0    | 144  | 0   |
| 29  | 275  | 56  | 342 | 211  | 2338 | 40  |
| 0   | 14   | 101 | 0   | 116  | 3171 | 10  |
| 0   | 0    | 54  | 0   | 12   | 890  | 0   |
| 82  | 0    | 0   | 50  | 0    | 0    | 0   |
| 0   | 41   | 16  | 0   | 57   | 554  | 0   |
| 0   | 0    | 0   | 0   | 0    | 0    | 0   |
| 0   | 14   | 13  | 0   | 66   | 403  | 0   |
| 621 | 65   | 24  | 177 | 238  | 211  | 13  |
| 0   | 0    | 0   | 12  | 76   | 61   | 0   |
| 0   | 0    | 0   | 68  | 85   | 22   | 0   |
| 0   | 0    | 0   | 0   | 0    | 0    | 29  |
| 0   | 0    | 0   | 0   | 0    | 0    | 0   |
| 0   | 114  | 0   | 117 | 40   | 854  | 0   |
| 10  | 10   | 0   | 70  | 33   | 122  | 16  |
| 36  | 64   | 24  | 26  | 49   | 0    | 11  |
| 0   | 13   | 0   | 10  | 17   | 0    | 0   |
| 67  | 584  | 170 | 786 | 383  | 139  | 77  |
| 0   | 0    | 0   | 0   | 0    | 0    | 0   |
| 77  | 1509 | 239 | 70  | 103  | 470  | 320 |

|      |      |      |      |      |      |     |
|------|------|------|------|------|------|-----|
| 102  | 4608 | 1723 | 187  | 4245 | 1563 | 231 |
| 0    | 24   | 0    | 0    | 0    | 15   | 0   |
| 0    | 83   | 34   | 0    | 0    | 54   | 11  |
| 505  | 728  | 110  | 112  | 55   | 210  | 23  |
| 0    | 6810 | 97   | 0    | 67   | 253  | 0   |
| 0    | 134  | 314  | 0    | 242  | 99   | 0   |
| 0    | 35   | 0    | 21   | 190  | 29   | 0   |
| 117  | 419  | 38   | 0    | 118  | 90   | 68  |
| 0    | 62   | 0    | 0    | 0    | 0    | 0   |
| 0    | 0    | 0    | 0    | 0    | 0    | 0   |
| 0    | 0    | 10   | 0    | 0    | 0    | 0   |
| 0    | 663  | 116  | 11   | 17   | 268  | 39  |
| 232  | 2944 | 2235 | 757  | 3926 | 2116 | 112 |
| 0    | 246  | 50   | 40   | 184  | 26   | 0   |
| 0    | 465  | 63   | 51   | 46   | 680  | 0   |
| 78   | 562  | 94   | 184  | 59   | 545  | 0   |
| 86   | 2381 | 352  | 570  | 227  | 2281 | 28  |
| 0    | 144  | 14   | 29   | 10   | 11   | 0   |
| 20   | 87   | 0    | 33   | 0    | 0    | 0   |
| 10   | 276  | 11   | 34   | 21   | 25   | 0   |
| 0    | 113  | 0    | 23   | 0    | 0    | 0   |
| 0    | 49   | 0    | 37   | 48   | 0    | 0   |
| 129  | 209  | 14   | 427  | 219  | 0    | 20  |
| 789  | 81   | 0    | 68   | 11   | 0    | 10  |
| 207  | 27   | 0    | 20   | 0    | 0    | 0   |
| 0    | 148  | 54   | 0    | 12   | 11   | 0   |
| 2996 | 6856 | 1534 | 4979 | 1873 | 1352 | 303 |
| 217  | 417  | 132  | 1114 | 0    | 107  | 0   |
| 72   | 139  | 0    | 44   | 0    | 17   | 0   |
| 0    | 1081 | 80   | 649  | 0    | 10   | 0   |
| 69   | 2639 | 697  | 227  | 520  | 671  | 255 |
| 55   | 1550 | 161  | 3176 | 0    | 40   | 34  |
| 65   | 134  | 0    | 560  | 20   | 0    | 0   |
| 23   | 40   | 0    | 0    | 244  | 0    | 0   |
| 0    | 482  | 220  | 1266 | 0    | 15   | 24  |
| 22   | 1618 | 0    | 1130 | 83   | 45   | 31  |
| 0    | 135  | 0    | 44   | 16   | 0    | 0   |
| 338  | 906  | 39   | 313  | 255  | 268  | 0   |
| 579  | 517  | 0    | 451  | 169  | 54   | 34  |
| 93   | 357  | 60   | 336  | 220  | 95   | 32  |
| 17   | 849  | 25   | 53   | 1092 | 45   | 0   |
| 0    | 1779 | 26   | 29   | 1731 | 128  | 0   |
| 0    | 13   | 0    | 26   | 12   | 0    | 0   |
| 0    | 363  | 255  | 127  | 330  | 134  | 0   |
| 71   | 279  | 81   | 128  | 617  | 99   | 149 |
| 0    | 40   | 13   | 0    | 0    | 16   | 15  |

|     |      |     |     |     |      |     |
|-----|------|-----|-----|-----|------|-----|
| 28  | 1141 | 415 | 325 | 98  | 2051 | 696 |
| 49  | 1022 | 516 | 254 | 11  | 55   | 245 |
| 0   | 164  | 118 | 11  | 22  | 50   | 11  |
| 82  | 994  | 88  | 105 | 66  | 10   | 274 |
| 0   | 67   | 0   | 51  | 0   | 12   | 0   |
| 0   | 10   | 0   | 10  | 0   | 0    | 22  |
| 24  | 323  | 152 | 214 | 10  | 206  | 173 |
| 12  | 183  | 11  | 40  | 0   | 0    | 35  |
| 0   | 41   | 47  | 13  | 0   | 0    | 177 |
| 0   | 328  | 0   | 286 | 0   | 0    | 37  |
| 0   | 0    | 0   | 0   | 0   | 0    | 0   |
| 34  | 1113 | 93  | 189 | 83  | 38   | 798 |
| 445 | 0    | 0   | 0   | 0   | 0    | 0   |
| 40  | 84   | 0   | 0   | 0   | 0    | 0   |
| 0   | 25   | 0   | 0   | 0   | 0    | 0   |
| 0   | 0    | 0   | 0   | 0   | 0    | 0   |
| 560 | 0    | 0   | 0   | 0   | 0    | 0   |
| 0   | 0    | 0   | 0   | 0   | 56   | 0   |
| 202 | 364  | 107 | 296 | 423 | 1503 | 21  |
| 0   | 0    | 0   | 0   | 0   | 0    | 0   |
| 0   | 0    | 0   | 0   | 0   | 0    | 0   |
| 0   | 0    | 0   | 0   | 0   | 0    | 0   |
| 0   | 0    | 0   | 0   | 0   | 0    | 0   |
| 0   | 141  | 76  | 118 | 169 | 987  | 31  |
| 0   | 0    | 0   | 0   | 0   | 0    | 0   |
| 0   | 12   | 0   | 59  | 0   | 182  | 0   |
| 0   | 24   | 0   | 0   | 0   | 0    | 0   |
| 0   | 27   | 0   | 0   | 40  | 0    | 0   |
| 0   | 0    | 0   | 0   | 0   | 78   | 0   |
| 0   | 0    | 0   | 12  | 0   | 0    | 0   |
| 0   | 0    | 0   | 0   | 0   | 0    | 0   |
| 0   | 0    | 0   | 0   | 0   | 0    | 0   |
| 0   | 0    | 0   | 0   | 0   | 0    | 0   |
| 0   | 0    | 0   | 0   | 0   | 0    | 0   |
| 0   | 0    | 0   | 0   | 0   | 58   | 0   |
| 42  | 29   | 0   | 67  | 0   | 0    | 0   |
| 0   | 0    | 0   | 0   | 0   | 0    | 0   |
| 0   | 0    | 0   | 0   | 0   | 0    | 0   |
| 0   | 0    | 0   | 0   | 0   | 0    | 0   |
| 0   | 12   | 0   | 20  | 0   | 0    | 0   |
| 0   | 25   | 0   | 45  | 0   | 374  | 0   |
| 0   | 10   | 0   | 0   | 0   | 0    | 0   |
| 0   | 70   | 22  | 0   | 0   | 364  | 0   |
| 0   | 67   | 0   | 0   | 13  | 133  | 0   |
| 27  | 90   | 0   | 16  | 0   | 36   | 0   |
| 0   | 0    | 0   | 0   | 0   | 0    | 0   |
| 0   | 0    | 0   | 0   | 0   | 0    | 0   |



|      |     |     |     |      |      |    |
|------|-----|-----|-----|------|------|----|
| 42   | 11  | 10  | 13  | 11   | 45   | 12 |
| 0    | 0   | 0   | 0   | 0    | 0    | 0  |
| 0    | 17  | 0   | 0   | 0    | 21   | 0  |
| 380  | 440 | 247 | 84  | 1026 | 3425 | 92 |
| 0    | 0   | 0   | 0   | 0    | 0    | 0  |
| 0    | 11  | 0   | 30  | 0    | 0    | 0  |
| 0    | 0   | 22  | 0   | 0    | 0    | 0  |
| 21   | 0   | 28  | 0   | 0    | 30   | 11 |
| 33   | 0   | 0   | 10  | 0    | 13   | 0  |
| 0    | 11  | 25  | 0   | 0    | 58   | 23 |
| 52   | 0   | 29  | 10  | 52   | 1662 | 11 |
| 888  | 126 | 71  | 178 | 102  | 1027 | 27 |
| 142  | 55  | 36  | 60  | 53   | 222  | 0  |
| 238  | 295 | 49  | 199 | 228  | 1138 | 44 |
| 23   | 0   | 0   | 0   | 26   | 13   | 0  |
| 0    | 0   | 0   | 0   | 0    | 0    | 0  |
| 0    | 0   | 0   | 0   | 0    | 0    | 0  |
| 0    | 0   | 0   | 0   | 37   | 213  | 0  |
| 0    | 0   | 0   | 0   | 0    | 0    | 0  |
| 0    | 0   | 0   | 0   | 0    | 11   | 0  |
| 0    | 52  | 12  | 12  | 74   | 348  | 0  |
| 0    | 0   | 0   | 0   | 0    | 0    | 0  |
| 10   | 0   | 12  | 14  | 0    | 87   | 24 |
| 62   | 69  | 50  | 39  | 389  | 2886 | 22 |
| 0    | 0   | 0   | 0   | 0    | 31   | 0  |
| 0    | 0   | 0   | 0   | 0    | 162  | 0  |
| 0    | 10  | 47  | 0   | 0    | 52   | 26 |
| 0    | 0   | 0   | 0   | 0    | 0    | 0  |
| 160  | 409 | 359 | 192 | 179  | 1146 | 58 |
| 0    | 0   | 32  | 0   | 0    | 40   | 0  |
| 0    | 0   | 21  | 0   | 0    | 105  | 0  |
| 0    | 0   | 76  | 21  | 0    | 199  | 27 |
| 0    | 12  | 23  | 14  | 32   | 418  | 0  |
| 0    | 29  | 0   | 0   | 0    | 42   | 0  |
| 0    | 0   | 0   | 0   | 0    | 0    | 0  |
| 0    | 0   | 0   | 0   | 0    | 0    | 0  |
| 0    | 0   | 0   | 0   | 13   | 513  | 0  |
| 1256 | 150 | 72  | 186 | 10   | 523  | 47 |
| 0    | 0   | 0   | 0   | 0    | 0    | 0  |
| 0    | 0   | 0   | 0   | 0    | 108  | 0  |
| 139  | 12  | 0   | 0   | 0    | 39   | 0  |
| 10   | 0   | 0   | 0   | 0    | 0    | 0  |
| 0    | 0   | 0   | 0   | 0    | 64   | 0  |
| 0    | 0   | 0   | 0   | 0    | 0    | 0  |
| 0    | 0   | 0   | 0   | 0    | 0    | 0  |
| 0    | 0   | 0   | 0   | 0    | 0    | 0  |

|      |      |     |      |      |      |      |
|------|------|-----|------|------|------|------|
| 0    | 21   | 31  | 0    | 11   | 174  | 38   |
| 0    | 0    | 0   | 0    | 0    | 49   | 0    |
| 0    | 0    | 0   | 0    | 0    | 0    | 0    |
| 0    | 0    | 0   | 0    | 0    | 0    | 0    |
| 0    | 0    | 0   | 0    | 0    | 0    | 0    |
| 0    | 0    | 0   | 0    | 0    | 392  | 0    |
| 0    | 0    | 0   | 0    | 0    | 0    | 0    |
| 0    | 0    | 0   | 0    | 0    | 93   | 0    |
| 1117 | 971  | 278 | 646  | 1085 | 6768 | 194  |
| 137  | 44   | 0   | 33   | 0    | 635  | 0    |
| 0    | 0    | 0   | 0    | 25   | 330  | 0    |
| 245  | 371  | 346 | 152  | 431  | 2817 | 45   |
| 0    | 0    | 0   | 0    | 0    | 0    | 0    |
| 0    | 0    | 0   | 0    | 0    | 37   | 0    |
| 0    | 35   | 11  | 0    | 23   | 260  | 0    |
| 11   | 125  | 513 | 12   | 1476 | 6706 | 94   |
| 0    | 10   | 0   | 0    | 26   | 1417 | 0    |
| 0    | 0    | 0   | 39   | 0    | 0    | 0    |
| 0    | 0    | 0   | 0    | 0    | 0    | 0    |
| 0    | 12   | 0   | 0    | 0    | 0    | 0    |
| 0    | 0    | 0   | 0    | 0    | 0    | 0    |
| 0    | 0    | 0   | 0    | 0    | 0    | 0    |
| 0    | 22   | 0   | 11   | 0    | 0    | 0    |
| 70   | 88   | 0   | 0    | 147  | 734  | 0    |
| 78   | 392  | 299 | 991  | 270  | 666  | 156  |
| 399  | 346  | 170 | 308  | 884  | 4984 | 35   |
| 235  | 47   | 0   | 47   | 44   | 31   | 0    |
| 0    | 0    | 0   | 0    | 79   | 0    | 0    |
| 46   | 49   | 48  | 58   | 143  | 62   | 52   |
| 0    | 0    | 0   | 0    | 0    | 0    | 0    |
| 0    | 0    | 0   | 0    | 0    | 0    | 0    |
| 0    | 0    | 0   | 0    | 0    | 0    | 0    |
| 0    | 0    | 10  | 0    | 72   | 0    | 0    |
| 27   | 33   | 0   | 0    | 68   | 0    | 0    |
| 57   | 69   | 0   | 35   | 99   | 21   | 0    |
| 0    | 0    | 0   | 0    | 0    | 33   | 0    |
| 114  | 41   | 0   | 12   | 0    | 237  | 58   |
| 907  | 2854 | 853 | 2316 | 674  | 1150 | 1299 |
| 96   | 43   | 25  | 87   | 12   | 35   | 69   |
| 0    | 0    | 0   | 0    | 0    | 0    | 13   |
| 16   | 357  | 365 | 473  | 132  | 0    | 142  |
| 0    | 0    | 0   | 0    | 0    | 0    | 0    |
| 0    | 39   | 0   | 13   | 0    | 0    | 0    |
| 0    | 0    | 0   | 12   | 11   | 0    | 26   |
| 0    | 0    | 0   | 0    | 0    | 0    | 0    |
| 0    | 78   | 35  | 0    | 12   | 52   | 10   |

|      |      |      |      |      |      |     |
|------|------|------|------|------|------|-----|
| 0    | 0    | 16   | 39   | 14   | 0    | 0   |
| 0    | 0    | 0    | 0    | 0    | 0    | 0   |
| 0    | 0    | 0    | 0    | 0    | 0    | 0   |
| 0    | 122  | 205  | 162  | 121  | 29   | 213 |
| 0    | 10   | 0    | 0    | 18   | 29   | 0   |
| 0    | 10   | 0    | 0    | 140  | 33   | 11  |
| 0    | 45   | 14   | 36   | 98   | 1464 | 0   |
| 30   | 21   | 0    | 22   | 122  | 0    | 0   |
| 0    | 0    | 0    | 0    | 33   | 449  | 13  |
| 0    | 0    | 0    | 0    | 0    | 0    | 0   |
| 377  | 199  | 0    | 136  | 840  | 530  | 0   |
| 0    | 12   | 0    | 15   | 18   | 0    | 14  |
| 0    | 0    | 27   | 0    | 0    | 0    | 0   |
| 0    | 128  | 0    | 0    | 0    | 0    | 0   |
| 0    | 68   | 0    | 0    | 11   | 27   | 0   |
| 0    | 24   | 0    | 0    | 0    | 0    | 0   |
| 0    | 0    | 0    | 0    | 0    | 246  | 0   |
| 0    | 0    | 0    | 0    | 15   | 186  | 0   |
| 38   | 31   | 26   | 13   | 69   | 975  | 0   |
| 0    | 12   | 0    | 0    | 0    | 0    | 0   |
| 0    | 45   | 314  | 46   | 10   | 524  | 316 |
| 0    | 0    | 0    | 0    | 0    | 0    | 0   |
| 0    | 38   | 0    | 58   | 0    | 304  | 0   |
| 0    | 0    | 0    | 0    | 0    | 0    | 0   |
| 0    | 152  | 12   | 65   | 91   | 11   | 21  |
| 0    | 0    | 0    | 0    | 0    | 0    | 0   |
| 0    | 0    | 0    | 0    | 0    | 0    | 0   |
| 0    | 83   | 0    | 0    | 0    | 10   | 0   |
| 0    | 0    | 0    | 0    | 13   | 0    | 0   |
| 0    | 0    | 0    | 0    | 0    | 0    | 0   |
| 0    | 0    | 0    | 0    | 40   | 0    | 0   |
| 0    | 0    | 0    | 0    | 0    | 0    | 0   |
| 0    | 0    | 0    | 0    | 0    | 0    | 0   |
| 0    | 0    | 35   | 0    | 0    | 262  | 0   |
| 0    | 0    | 0    | 0    | 0    | 0    | 0   |
| 0    | 0    | 0    | 0    | 0    | 0    | 0   |
| 0    | 112  | 0    | 29   | 0    | 0    | 0   |
| 31   | 10   | 0    | 20   | 26   | 495  | 10  |
| 1705 | 6476 | 1006 | 1381 | 2324 | 9405 | 485 |
| 0    | 0    | 0    | 0    | 0    | 0    | 0   |
| 0    | 0    | 0    | 0    | 0    | 0    | 0   |
| 0    | 0    | 0    | 0    | 0    | 0    | 0   |
| 75   | 40   | 0    | 11   | 169  | 37   | 38  |
| 135  | 33   | 0    | 0    | 0    | 36   | 0   |
| 0    | 0    | 0    | 0    | 0    | 0    | 0   |
| 0    | 0    | 0    | 0    | 0    | 0    | 0   |

|     |      |      |     |      |       |     |
|-----|------|------|-----|------|-------|-----|
| 0   | 0    | 0    | 0   | 0    | 0     | 0   |
| 0   | 58   | 27   | 29  | 39   | 154   | 0   |
| 0   | 0    | 0    | 0   | 0    | 0     | 0   |
| 0   | 0    | 0    | 0   | 0    | 0     | 0   |
| 0   | 0    | 0    | 0   | 0    | 0     | 0   |
| 0   | 128  | 0    | 0   | 0    | 469   | 0   |
| 0   | 0    | 0    | 0   | 0    | 0     | 0   |
| 10  | 0    | 0    | 0   | 0    | 41    | 0   |
| 0   | 0    | 0    | 0   | 0    | 0     | 0   |
| 48  | 0    | 0    | 0   | 0    | 0     | 0   |
| 0   | 0    | 0    | 0   | 0    | 108   | 0   |
| 0   | 116  | 24   | 0   | 0    | 57    | 0   |
| 68  | 1687 | 2062 | 488 | 2587 | 15149 | 423 |
| 34  | 320  | 153  | 34  | 423  | 1575  | 55  |
| 0   | 26   | 34   | 0   | 0    | 0     | 0   |
| 0   | 0    | 0    | 0   | 0    | 0     | 0   |
| 0   | 0    | 0    | 0   | 0    | 52    | 0   |
| 0   | 36   | 0    | 0   | 0    | 0     | 0   |
| 0   | 0    | 75   | 24  | 53   | 103   | 0   |
| 34  | 762  | 295  | 124 | 748  | 2766  | 47  |
| 32  | 140  | 138  | 25  | 218  | 2416  | 76  |
| 40  | 70   | 53   | 14  | 41   | 242   | 10  |
| 259 | 84   | 0    | 76  | 27   | 0     | 0   |
| 0   | 0    | 0    | 0   | 0    | 0     | 0   |
| 0   | 0    | 0    | 0   | 0    | 122   | 0   |
| 0   | 0    | 0    | 0   | 0    | 0     | 0   |
| 0   | 0    | 0    | 0   | 10   | 0     | 0   |
| 0   | 311  | 131  | 12  | 185  | 2460  | 16  |
| 0   | 0    | 0    | 0   | 0    | 0     | 0   |
| 0   | 0    | 0    | 0   | 0    | 12    | 0   |
| 0   | 0    | 0    | 0   | 0    | 0     | 0   |
| 0   | 0    | 0    | 0   | 0    | 0     | 0   |
| 113 | 425  | 195  | 122 | 119  | 299   | 11  |
| 0   | 0    | 0    | 53  | 0    | 341   | 0   |
| 0   | 14   | 0    | 0   | 0    | 760   | 0   |
| 0   | 0    | 0    | 0   | 0    | 0     | 0   |
| 40  | 142  | 105  | 35  | 30   | 98    | 14  |
| 0   | 12   | 148  | 17  | 12   | 28    | 10  |
| 147 | 109  | 218  | 0   | 0    | 140   | 104 |
| 0   | 184  | 369  | 112 | 120  | 189   | 62  |
| 0   | 10   | 0    | 12  | 0    | 0     | 0   |
| 25  | 59   | 0    | 0   | 0    | 0     | 0   |
| 0   | 0    | 0    | 0   | 0    | 0     | 0   |
| 104 | 256  | 490  | 884 | 856  | 2077  | 68  |
| 0   | 0    | 0    | 0   | 0    | 225   | 0   |
| 0   | 0    | 0    | 0   | 0    | 83    | 0   |

|     |      |     |      |      |      |     |
|-----|------|-----|------|------|------|-----|
| 0   | 0    | 0   | 0    | 0    | 0    | 0   |
| 0   | 0    | 0   | 0    | 0    | 42   | 0   |
| 0   | 0    | 0   | 0    | 0    | 0    | 0   |
| 0   | 0    | 12  | 0    | 21   | 1422 | 0   |
| 110 | 279  | 189 | 169  | 375  | 238  | 12  |
| 60  | 44   | 221 | 181  | 590  | 395  | 11  |
| 0   | 78   | 132 | 28   | 370  | 191  | 19  |
| 0   | 0    | 0   | 135  | 47   | 16   | 0   |
| 386 | 127  | 26  | 36   | 99   | 47   | 0   |
| 0   | 11   | 0   | 40   | 0    | 0    | 0   |
| 0   | 0    | 0   | 10   | 0    | 243  | 0   |
| 0   | 10   | 0   | 0    | 0    | 47   | 0   |
| 0   | 0    | 0   | 0    | 0    | 0    | 0   |
| 0   | 0    | 0   | 0    | 0    | 49   | 0   |
| 0   | 0    | 0   | 0    | 0    | 0    | 0   |
| 0   | 0    | 0   | 0    | 0    | 0    | 0   |
| 0   | 0    | 0   | 0    | 0    | 0    | 0   |
| 0   | 68   | 0   | 72   | 0    | 555  | 0   |
| 0   | 0    | 0   | 0    | 0    | 219  | 0   |
| 0   | 78   | 30  | 0    | 0    | 0    | 263 |
| 0   | 10   | 31  | 0    | 250  | 1545 | 0   |
| 0   | 0    | 0   | 0    | 0    | 0    | 0   |
| 0   | 247  | 512 | 619  | 2500 | 6816 | 131 |
| 0   | 0    | 0   | 0    | 12   | 72   | 0   |
| 87  | 402  | 170 | 279  | 966  | 4137 | 27  |
| 0   | 0    | 0   | 0    | 0    | 0    | 0   |
| 0   | 18   | 35  | 0    | 781  | 708  | 10  |
| 10  | 140  | 27  | 34   | 252  | 2540 | 0   |
| 0   | 12   | 0   | 0    | 0    | 0    | 0   |
| 0   | 0    | 0   | 0    | 0    | 0    | 0   |
| 0   | 0    | 0   | 0    | 0    | 0    | 0   |
| 30  | 3336 | 94  | 1903 | 10   | 1030 | 0   |
| 0   | 927  | 88  | 811  | 15   | 537  | 10  |
| 0   | 0    | 0   | 0    | 0    | 0    | 0   |
| 114 | 14   | 0   | 0    | 10   | 156  | 0   |
| 0   | 0    | 0   | 0    | 0    | 49   | 0   |
| 0   | 0    | 0   | 0    | 0    | 87   | 0   |
| 0   | 0    | 0   | 0    | 0    | 0    | 0   |
| 0   | 10   | 0   | 0    | 0    | 0    | 0   |
| 0   | 0    | 0   | 0    | 0    | 0    | 0   |
| 0   | 144  | 0   | 0    | 13   | 24   | 81  |
| 15  | 1291 | 13  | 437  | 102  | 0    | 32  |
| 696 | 0    | 88  | 0    | 1196 | 724  | 462 |
| 0   | 61   | 236 | 0    | 0    | 69   | 10  |
| 95  | 0    | 249 | 0    | 0    | 182  | 0   |
| 0   | 0    | 0   | 0    | 0    | 0    | 0   |

|      |       |       |      |       |      |      |
|------|-------|-------|------|-------|------|------|
| 0    | 0     | 17    | 0    | 28    | 0    | 16   |
| 22   | 222   | 454   | 68   | 12    | 266  | 569  |
| 0    | 0     | 77    | 10   | 0     | 10   | 0    |
| 37   | 11    | 0     | 26   | 33    | 39   | 44   |
| 0    | 35    | 280   | 10   | 0     | 47   | 268  |
| 0    | 0     | 0     | 0    | 122   | 38   | 98   |
| 59   | 0     | 0     | 175  | 355   | 12   | 0    |
| 53   | 0     | 0     | 0    | 0     | 1287 | 0    |
| 883  | 2963  | 3154  | 456  | 3687  | 5240 | 349  |
| 27   | 3624  | 843   | 627  | 336   | 4788 | 78   |
| 10   | 3393  | 85    | 159  | 149   | 352  | 12   |
| 38   | 16    | 0     | 10   | 0     | 184  | 0    |
| 0    | 0     | 0     | 0    | 0     | 0    | 0    |
| 28   | 26    | 0     | 0    | 0     | 90   | 16   |
| 0    | 0     | 0     | 0    | 0     | 0    | 0    |
| 33   | 0     | 0     | 0    | 0     | 295  | 112  |
| 0    | 0     | 11    | 0    | 0     | 41   | 0    |
| 0    | 0     | 0     | 0    | 0     | 0    | 0    |
| 0    | 0     | 0     | 0    | 0     | 22   | 10   |
| 0    | 0     | 35    | 0    | 0     | 0    | 0    |
| 100  | 0     | 0     | 25   | 548   | 60   | 134  |
| 53   | 38    | 102   | 60   | 0     | 126  | 43   |
| 0    | 39    | 0     | 0    | 0     | 0    | 77   |
| 0    | 0     | 0     | 0    | 0     | 0    | 0    |
| 0    | 0     | 0     | 0    | 0     | 0    | 0    |
| 10   | 218   | 401   | 59   | 37    | 74   | 42   |
| 175  | 3043  | 2768  | 1035 | 2448  | 1845 | 1693 |
| 391  | 1642  | 638   | 428  | 2153  | 533  | 335  |
| 7104 | 13183 | 10130 | 6014 | 12557 | 6964 | 2290 |
| 0    | 115   | 16    | 124  | 295   | 36   | 33   |
| 10   | 51    | 46    | 106  | 720   | 11   | 23   |
| 0    | 100   | 0     | 45   | 210   | 14   | 503  |
| 322  | 1508  | 3442  | 1455 | 1823  | 365  | 150  |
| 138  | 1244  | 840   | 600  | 1157  | 317  | 174  |
| 0    | 34    | 51    | 20   | 246   | 32   | 0    |
| 0    | 58    | 0     | 110  | 0     | 0    | 0    |
| 3081 | 216   | 185   | 90   | 740   | 750  | 1075 |
| 1326 | 351   | 184   | 57   | 104   | 847  | 1393 |
| 527  | 91    | 70    | 11   | 74    | 927  | 1374 |
| 255  | 327   | 673   | 236  | 518   | 162  | 633  |
| 0    | 28    | 0     | 26   | 24    | 0    | 0    |
| 0    | 0     | 16    | 0    | 15    | 0    | 0    |
| 2764 | 261   | 227   | 254  | 225   | 1051 | 3061 |
| 64   | 0     | 22    | 0    | 0     | 55   | 41   |
| 0    | 21    | 70    | 0    | 0     | 0    | 0    |
| 974  | 168   | 316   | 81   | 29    | 1373 | 1506 |

|      |      |      |      |      |      |      |
|------|------|------|------|------|------|------|
| 817  | 160  | 303  | 14   | 231  | 321  | 192  |
| 1712 | 3140 | 1814 | 2072 | 1753 | 7937 | 1221 |
| 0    | 18   | 0    | 0    | 68   | 410  | 0    |
| 0    | 328  | 230  | 95   | 137  | 263  | 325  |
| 445  | 57   | 67   | 10   | 279  | 55   | 18   |
| 0    | 0    | 0    | 15   | 11   | 0    | 0    |
| 992  | 172  | 819  | 102  | 546  | 406  | 500  |
| 0    | 52   | 37   | 81   | 11   | 331  | 0    |
| 0    | 0    | 0    | 0    | 0    | 0    | 0    |
| 86   | 28   | 11   | 0    | 0    | 34   | 0    |
| 301  | 107  | 32   | 32   | 0    | 98   | 15   |
| 54   | 38   | 64   | 0    | 15   | 139  | 54   |
| 0    | 0    | 0    | 0    | 0    | 0    | 0    |
| 0    | 0    | 0    | 0    | 0    | 0    | 0    |
| 108  | 194  | 54   | 0    | 12   | 224  | 54   |
| 96   | 229  | 348  | 502  | 297  | 6572 | 32   |
| 1460 | 76   | 51   | 23   | 12   | 66   | 11   |
| 0    | 0    | 111  | 176  | 75   | 808  | 59   |
| 0    | 0    | 39   | 0    | 0    | 50   | 72   |
| 60   | 0    | 0    | 0    | 0    | 0    | 0    |
| 126  | 0    | 58   | 0    | 0    | 233  | 98   |
| 0    | 0    | 0    | 0    | 0    | 0    | 0    |
| 0    | 0    | 0    | 0    | 0    | 0    | 0    |
| 0    | 57   | 15   | 11   | 0    | 0    | 0    |
| 0    | 78   | 167  | 0    | 86   | 253  | 62   |
| 0    | 0    | 0    | 0    | 0    | 0    | 0    |
| 0    | 0    | 0    | 0    | 0    | 0    | 0    |
| 0    | 0    | 0    | 0    | 0    | 0    | 0    |
| 0    | 0    | 0    | 0    | 0    | 0    | 0    |
| 112  | 0    | 0    | 0    | 0    | 10   | 10   |
| 0    | 0    | 0    | 0    | 0    | 20   | 22   |
| 0    | 0    | 0    | 0    | 0    | 167  | 0    |
| 0    | 44   | 34   | 10   | 11   | 253  | 53   |
| 0    | 157  | 244  | 56   | 210  | 621  | 82   |
| 60   | 0    | 26   | 66   | 17   | 2374 | 0    |
| 0    | 12   | 19   | 14   | 26   | 902  | 0    |
| 0    | 44   | 0    | 52   | 72   | 0    | 0    |
| 127  | 0    | 0    | 0    | 0    | 0    | 0    |
| 168  | 241  | 146  | 88   | 135  | 527  | 31   |
| 0    | 10   | 12   | 10   | 15   | 1688 | 0    |
| 30   | 12   | 0    | 20   | 60   | 1169 | 0    |
| 0    | 64   | 192  | 117  | 74   | 0    | 131  |
| 0    | 0    | 0    | 0    | 0    | 0    | 0    |
| 0    | 39   | 236  | 72   | 65   | 0    | 182  |
| 0    | 0    | 0    | 0    | 0    | 18   | 0    |
| 0    | 0    | 307  | 18   | 59   | 0    | 206  |





|     |     |     |     |    |     |    |
|-----|-----|-----|-----|----|-----|----|
| 0   | 0   | 0   | 0   | 0  | 65  | 0  |
| 0   | 33  | 37  | 13  | 0  | 0   | 0  |
| 0   | 12  | 0   | 0   | 0  | 0   | 0  |
| 13  | 0   | 0   | 0   | 0  | 76  | 0  |
| 0   | 0   | 0   | 0   | 0  | 48  | 0  |
| 0   | 0   | 0   | 0   | 0  | 0   | 0  |
| 64  | 34  | 0   | 0   | 0  | 103 | 0  |
| 0   | 15  | 0   | 0   | 0  | 58  | 0  |
| 0   | 0   | 0   | 0   | 0  | 0   | 0  |
| 0   | 0   | 0   | 0   | 0  | 0   | 0  |
| 0   | 0   | 0   | 0   | 0  | 0   | 0  |
| 0   | 0   | 14  | 0   | 14 | 442 | 0  |
| 94  | 0   | 0   | 43  | 0  | 0   | 0  |
| 0   | 21  | 0   | 0   | 0  | 19  | 0  |
| 0   | 0   | 0   | 0   | 0  | 0   | 0  |
| 0   | 0   | 0   | 0   | 0  | 140 | 0  |
| 0   | 31  | 0   | 0   | 0  | 36  | 0  |
| 0   | 11  | 0   | 0   | 10 | 143 | 0  |
| 498 | 51  | 0   | 34  | 32 | 0   | 0  |
| 0   | 0   | 0   | 0   | 28 | 13  | 0  |
| 0   | 25  | 0   | 0   | 0  | 0   | 0  |
| 0   | 0   | 0   | 0   | 0  | 0   | 0  |
| 0   | 0   | 71  | 0   | 0  | 31  | 40 |
| 0   | 140 | 0   | 0   | 0  | 0   | 0  |
| 0   | 0   | 0   | 0   | 0  | 0   | 0  |
| 16  | 0   | 0   | 0   | 0  | 0   | 0  |
| 0   | 0   | 0   | 0   | 0  | 101 | 0  |
| 0   | 0   | 0   | 0   | 0  | 65  | 0  |
| 0   | 0   | 0   | 0   | 0  | 0   | 0  |
| 0   | 0   | 0   | 0   | 0  | 0   | 0  |
| 0   | 0   | 0   | 0   | 0  | 0   | 0  |
| 10  | 0   | 0   | 0   | 0  | 11  | 0  |
| 0   | 0   | 0   | 0   | 0  | 35  | 0  |
| 95  | 156 | 0   | 0   | 0  | 0   | 0  |
| 0   | 0   | 68  | 0   | 27 | 0   | 16 |
| 0   | 0   | 0   | 0   | 14 | 498 | 0  |
| 0   | 0   | 0   | 0   | 0  | 0   | 0  |
| 0   | 735 | 106 | 57  | 0  | 92  | 0  |
| 0   | 0   | 0   | 0   | 0  | 0   | 0  |
| 0   | 0   | 0   | 0   | 0  | 0   | 0  |
| 22  | 31  | 0   | 125 | 0  | 717 | 0  |
| 0   | 15  | 0   | 46  | 0  | 249 | 0  |
| 0   | 0   | 0   | 37  | 10 | 446 | 0  |
| 0   | 0   | 0   | 0   | 0  | 0   | 0  |
| 23  | 364 | 38  | 0   | 55 | 33  | 40 |
| 0   | 0   | 0   | 0   | 0  | 0   | 0  |

|     |     |      |     |     |      |     |
|-----|-----|------|-----|-----|------|-----|
| 0   | 34  | 0    | 0   | 0   | 418  | 10  |
| 0   | 21  | 0    | 0   | 0   | 38   | 0   |
| 0   | 0   | 0    | 0   | 0   | 0    | 0   |
| 0   | 0   | 0    | 0   | 0   | 149  | 0   |
| 694 | 0   | 273  | 0   | 374 | 93   | 170 |
| 632 | 412 | 214  | 151 | 829 | 1835 | 34  |
| 0   | 0   | 0    | 0   | 0   | 0    | 0   |
| 0   | 126 | 0    | 10  | 21  | 337  | 0   |
| 0   | 0   | 0    | 0   | 0   | 318  | 0   |
| 0   | 104 | 0    | 11  | 0   | 340  | 0   |
| 0   | 11  | 0    | 0   | 0   | 0    | 0   |
| 0   | 0   | 0    | 0   | 0   | 32   | 0   |
| 0   | 370 | 905  | 107 | 134 | 37   | 245 |
| 0   | 0   | 0    | 0   | 0   | 0    | 0   |
| 0   | 0   | 0    | 0   | 0   | 0    | 0   |
| 0   | 0   | 36   | 0   | 100 | 10   | 0   |
| 0   | 0   | 0    | 0   | 125 | 0    | 0   |
| 0   | 0   | 0    | 0   | 0   | 0    | 47  |
| 22  | 824 | 1441 | 81  | 14  | 12   | 775 |
| 0   | 0   | 0    | 0   | 0   | 0    | 0   |
| 0   | 0   | 0    | 0   | 0   | 0    | 0   |
| 0   | 11  | 0    | 0   | 19  | 0    | 0   |
| 0   | 39  | 0    | 0   | 124 | 0    | 0   |
| 0   | 0   | 0    | 0   | 0   | 400  | 0   |
| 0   | 0   | 0    | 0   | 40  | 29   | 0   |
| 10  | 0   | 41   | 0   | 0   | 67   | 0   |
| 0   | 0   | 0    | 0   | 0   | 0    | 0   |
| 0   | 0   | 11   | 0   | 0   | 1168 | 0   |
| 0   | 49  | 79   | 17  | 165 | 26   | 0   |
| 0   | 0   | 0    | 0   | 0   | 0    | 0   |
| 0   | 0   | 0    | 0   | 0   | 367  | 0   |
| 0   | 21  | 10   | 0   | 76  | 64   | 0   |
| 0   | 0   | 0    | 0   | 0   | 0    | 0   |
| 62  | 11  | 0    | 31  | 58  | 0    | 17  |
| 0   | 0   | 0    | 0   | 0   | 107  | 0   |
| 0   | 0   | 0    | 0   | 0   | 0    | 0   |
| 0   | 0   | 0    | 0   | 0   | 0    | 0   |
| 0   | 0   | 0    | 0   | 0   | 332  | 0   |
| 0   | 0   | 0    | 0   | 23  | 339  | 0   |
| 0   | 47  | 13   | 20  | 0   | 69   | 0   |
| 0   | 0   | 0    | 0   | 12  | 0    | 0   |
| 0   | 0   | 23   | 0   | 0   | 0    | 0   |
| 0   | 0   | 36   | 21  | 0   | 78   | 10  |
| 0   | 0   | 0    | 0   | 18  | 178  | 0   |
| 0   | 0   | 0    | 0   | 0   | 0    | 0   |
| 12  | 83  | 104  | 87  | 128 | 12   | 22  |

|     |     |      |     |     |     |     |
|-----|-----|------|-----|-----|-----|-----|
| 0   | 0   | 43   | 0   | 0   | 79  | 31  |
| 0   | 17  | 0    | 0   | 0   | 0   | 0   |
| 0   | 0   | 0    | 0   | 0   | 0   | 0   |
| 0   | 44  | 0    | 0   | 0   | 0   | 0   |
| 0   | 225 | 11   | 46  | 35  | 259 | 0   |
| 0   | 0   | 47   | 0   | 0   | 28  | 0   |
| 0   | 0   | 0    | 0   | 0   | 0   | 29  |
| 0   | 24  | 126  | 0   | 18  | 59  | 0   |
| 0   | 0   | 0    | 0   | 0   | 21  | 0   |
| 0   | 0   | 0    | 0   | 0   | 0   | 0   |
| 0   | 374 | 203  | 10  | 11  | 248 | 131 |
| 0   | 68  | 115  | 0   | 19  | 105 | 0   |
| 0   | 169 | 1097 | 0   | 275 | 221 | 0   |
| 0   | 14  | 0    | 0   | 33  | 0   | 0   |
| 0   | 153 | 366  | 10  | 65  | 101 | 0   |
| 0   | 45  | 0    | 0   | 16  | 0   | 0   |
| 0   | 38  | 35   | 0   | 0   | 77  | 25  |
| 0   | 25  | 0    | 0   | 0   | 60  | 0   |
| 0   | 448 | 0    | 0   | 40  | 23  | 11  |
| 0   | 0   | 0    | 0   | 0   | 0   | 0   |
| 0   | 0   | 0    | 0   | 11  | 0   | 0   |
| 0   | 0   | 0    | 10  | 50  | 0   | 0   |
| 0   | 0   | 0    | 0   | 0   | 36  | 0   |
| 0   | 0   | 0    | 0   | 0   | 142 | 0   |
| 0   | 164 | 57   | 0   | 0   | 31  | 0   |
| 0   | 22  | 79   | 0   | 19  | 0   | 0   |
| 0   | 304 | 45   | 131 | 49  | 625 | 0   |
| 0   | 157 | 0    | 14  | 0   | 214 | 0   |
| 0   | 199 | 104  | 97  | 71  | 610 | 0   |
| 0   | 10  | 24   | 0   | 0   | 169 | 0   |
| 110 | 16  | 0    | 0   | 0   | 0   | 0   |
| 0   | 12  | 0    | 0   | 0   | 0   | 0   |
| 0   | 42  | 0    | 0   | 0   | 0   | 0   |
| 0   | 88  | 0    | 0   | 0   | 0   | 0   |
| 12  | 0   | 0    | 0   | 0   | 0   | 0   |
| 0   | 0   | 0    | 0   | 0   | 0   | 0   |
| 0   | 0   | 0    | 0   | 0   | 0   | 0   |
| 0   | 58  | 273  | 0   | 13  | 0   | 0   |
| 0   | 60  | 300  | 23  | 46  | 312 | 0   |
| 0   | 27  | 165  | 0   | 0   | 35  | 0   |
| 0   | 438 | 34   | 0   | 0   | 176 | 10  |
| 0   | 145 | 26   | 0   | 0   | 0   | 0   |
| 0   | 31  | 0    | 0   | 0   | 0   | 0   |
| 0   | 0   | 0    | 0   | 0   | 0   | 0   |
| 0   | 41  | 83   | 0   | 0   | 0   | 53  |
| 0   | 23  | 69   | 0   | 0   | 0   | 25  |

|    |      |     |     |     |     |     |
|----|------|-----|-----|-----|-----|-----|
| 0  | 0    | 0   | 0   | 0   | 0   | 0   |
| 0  | 563  | 152 | 14  | 0   | 420 | 0   |
| 0  | 0    | 0   | 0   | 11  | 0   | 0   |
| 0  | 38   | 38  | 0   | 0   | 40  | 0   |
| 0  | 153  | 0   | 0   | 0   | 0   | 0   |
| 0  | 58   | 10  | 57  | 35  | 0   | 11  |
| 0  | 0    | 0   | 0   | 0   | 49  | 0   |
| 0  | 32   | 0   | 0   | 0   | 10  | 0   |
| 0  | 116  | 46  | 42  | 0   | 161 | 0   |
| 59 | 93   | 0   | 0   | 25  | 10  | 0   |
| 0  | 117  | 0   | 0   | 0   | 0   | 0   |
| 10 | 10   | 0   | 0   | 0   | 0   | 0   |
| 0  | 0    | 0   | 0   | 0   | 0   | 0   |
| 0  | 0    | 0   | 0   | 0   | 0   | 0   |
| 0  | 0    | 0   | 0   | 23  | 0   | 0   |
| 0  | 0    | 0   | 0   | 0   | 0   | 0   |
| 53 | 74   | 0   | 0   | 40  | 15  | 41  |
| 0  | 38   | 11  | 0   | 10  | 25  | 0   |
| 0  | 39   | 140 | 0   | 0   | 0   | 0   |
| 0  | 27   | 0   | 86  | 0   | 12  | 0   |
| 0  | 47   | 129 | 53  | 143 | 56  | 0   |
| 0  | 0    | 0   | 0   | 0   | 0   | 0   |
| 0  | 0    | 0   | 10  | 0   | 35  | 0   |
| 59 | 0    | 0   | 0   | 67  | 0   | 0   |
| 0  | 0    | 0   | 0   | 0   | 0   | 0   |
| 0  | 107  | 0   | 0   | 12  | 0   | 44  |
| 0  | 17   | 0   | 0   | 0   | 0   | 0   |
| 0  | 256  | 0   | 0   | 0   | 0   | 79  |
| 0  | 10   | 0   | 0   | 76  | 0   | 0   |
| 0  | 15   | 0   | 0   | 20  | 0   | 0   |
| 0  | 38   | 0   | 0   | 159 | 0   | 0   |
| 0  | 184  | 0   | 0   | 598 | 61  | 0   |
| 0  | 34   | 0   | 0   | 71  | 0   | 0   |
| 0  | 0    | 0   | 0   | 102 | 0   | 0   |
| 0  | 23   | 0   | 0   | 0   | 0   | 0   |
| 0  | 0    | 0   | 0   | 0   | 0   | 0   |
| 0  | 486  | 121 | 130 | 0   | 0   | 224 |
| 59 | 1395 | 132 | 132 | 62  | 0   | 317 |
| 0  | 79   | 0   | 0   | 0   | 0   | 11  |
| 11 | 115  | 14  | 49  | 0   | 0   | 35  |
| 0  | 114  | 0   | 0   | 0   | 0   | 67  |
| 0  | 381  | 11  | 123 | 149 | 0   | 0   |
| 0  | 0    | 0   | 0   | 31  | 0   | 0   |
| 0  | 0    | 0   | 0   | 85  | 0   | 0   |
| 0  | 183  | 35  | 33  | 84  | 0   | 0   |
| 0  | 765  | 74  | 532 | 0   | 13  | 0   |

|     |     |     |     |    |      |    |
|-----|-----|-----|-----|----|------|----|
| 0   | 0   | 0   | 0   | 0  | 0    | 0  |
| 0   | 43  | 0   | 0   | 0  | 0    | 0  |
| 26  | 118 | 22  | 37  | 10 | 16   | 49 |
| 0   | 121 | 0   | 0   | 10 | 0    | 24 |
| 0   | 119 | 24  | 24  | 15 | 0    | 10 |
| 0   | 72  | 0   | 15  | 0  | 0    | 20 |
| 0   | 0   | 0   | 0   | 0  | 0    | 0  |
| 748 | 12  | 0   | 0   | 0  | 14   | 0  |
| 0   | 0   | 0   | 0   | 0  | 17   | 0  |
| 41  | 10  | 0   | 0   | 0  | 272  | 0  |
| 453 | 0   | 10  | 0   | 0  | 0    | 0  |
| 0   | 0   | 79  | 0   | 0  | 11   | 30 |
| 0   | 0   | 0   | 0   | 0  | 15   | 0  |
| 0   | 0   | 0   | 0   | 0  | 10   | 10 |
| 0   | 0   | 13  | 0   | 0  | 42   | 12 |
| 0   | 0   | 15  | 0   | 12 | 19   | 0  |
| 0   | 52  | 0   | 25  | 0  | 85   | 0  |
| 0   | 0   | 0   | 0   | 0  | 0    | 0  |
| 0   | 0   | 0   | 0   | 0  | 0    | 0  |
| 0   | 0   | 0   | 0   | 0  | 0    | 0  |
| 0   | 0   | 0   | 0   | 0  | 0    | 0  |
| 0   | 12  | 0   | 0   | 0  | 0    | 0  |
| 0   | 0   | 0   | 0   | 0  | 0    | 0  |
| 0   | 0   | 0   | 0   | 0  | 0    | 0  |
| 0   | 0   | 0   | 0   | 0  | 0    | 0  |
| 0   | 0   | 0   | 0   | 0  | 0    | 0  |
| 0   | 0   | 0   | 0   | 0  | 0    | 0  |
| 33  | 0   | 0   | 0   | 0  | 0    | 0  |
| 0   | 12  | 0   | 0   | 0  | 0    | 0  |
| 0   | 0   | 0   | 0   | 0  | 97   | 0  |
| 0   | 0   | 0   | 0   | 0  | 0    | 0  |
| 0   | 0   | 0   | 0   | 26 | 381  | 0  |
| 0   | 0   | 0   | 0   | 27 | 109  | 0  |
| 0   | 0   | 0   | 0   | 0  | 0    | 0  |
| 0   | 0   | 0   | 0   | 0  | 0    | 0  |
| 142 | 32  | 55  | 120 | 15 | 1453 | 53 |
| 0   | 0   | 0   | 97  | 0  | 128  | 0  |
| 0   | 0   | 0   | 0   | 0  | 0    | 0  |
| 0   | 0   | 0   | 0   | 0  | 195  | 0  |
| 37  | 51  | 268 | 24  | 24 | 44   | 29 |
| 0   | 0   | 0   | 11  | 0  | 260  | 0  |
| 0   | 0   | 0   | 0   | 0  | 480  | 0  |
| 10  | 18  | 0   | 0   | 0  | 10   | 0  |
| 0   | 0   | 0   | 0   | 0  | 11   | 0  |
| 0   | 0   | 0   | 0   | 0  | 0    | 0  |
| 10  | 22  | 0   | 12  | 95 | 0    | 0  |
| 0   | 0   | 0   | 0   | 0  | 0    | 0  |

|    |     |    |    |     |     |     |
|----|-----|----|----|-----|-----|-----|
| 0  | 0   | 0  | 0  | 0   | 0   | 55  |
| 0  | 0   | 0  | 0  | 0   | 0   | 50  |
| 0  | 0   | 0  | 0  | 0   | 0   | 0   |
| 0  | 0   | 0  | 0  | 10  | 0   | 0   |
| 0  | 0   | 0  | 0  | 14  | 324 | 0   |
| 0  | 0   | 0  | 0  | 0   | 276 | 0   |
| 0  | 10  | 0  | 0  | 0   | 0   | 0   |
| 0  | 21  | 0  | 0  | 0   | 52  | 0   |
| 0  | 0   | 0  | 0  | 0   | 0   | 0   |
| 0  | 0   | 0  | 0  | 0   | 0   | 0   |
| 0  | 0   | 0  | 0  | 0   | 0   | 0   |
| 0  | 0   | 0  | 0  | 0   | 65  | 0   |
| 0  | 0   | 0  | 0  | 101 | 302 | 0   |
| 0  | 24  | 0  | 0  | 0   | 0   | 0   |
| 0  | 0   | 0  | 0  | 0   | 174 | 0   |
| 0  | 0   | 0  | 0  | 124 | 126 | 0   |
| 0  | 0   | 0  | 0  | 91  | 215 | 0   |
| 11 | 0   | 0  | 0  | 204 | 0   | 0   |
| 0  | 0   | 0  | 0  | 0   | 0   | 0   |
| 0  | 0   | 0  | 0  | 20  | 0   | 0   |
| 0  | 0   | 0  | 0  | 0   | 0   | 17  |
| 0  | 0   | 0  | 0  | 0   | 0   | 0   |
| 0  | 0   | 0  | 0  | 737 | 0   | 0   |
| 0  | 0   | 44 | 0  | 0   | 0   | 53  |
| 42 | 112 | 0  | 0  | 0   | 0   | 54  |
| 33 | 12  | 0  | 0  | 0   | 0   | 10  |
| 0  | 0   | 0  | 0  | 0   | 0   | 0   |
| 0  | 0   | 12 | 0  | 0   | 29  | 0   |
| 0  | 0   | 0  | 0  | 0   | 0   | 0   |
| 0  | 0   | 0  | 0  | 0   | 10  | 0   |
| 0  | 0   | 0  | 0  | 0   | 0   | 0   |
| 0  | 0   | 0  | 0  | 30  | 29  | 0   |
| 0  | 0   | 0  | 0  | 0   | 0   | 0   |
| 0  | 0   | 0  | 0  | 22  | 0   | 0   |
| 0  | 25  | 0  | 0  | 12  | 0   | 0   |
| 0  | 0   | 0  | 0  | 0   | 0   | 0   |
| 0  | 0   | 0  | 0  | 581 | 10  | 0   |
| 0  | 0   | 0  | 0  | 10  | 0   | 0   |
| 0  | 0   | 0  | 0  | 14  | 0   | 0   |
| 0  | 0   | 0  | 0  | 0   | 0   | 0   |
| 92 | 11  | 50 | 22 | 41  | 93  | 229 |
| 32 | 0   | 86 | 0  | 0   | 122 | 164 |
| 35 | 0   | 22 | 0  | 26  | 0   | 0   |
| 0  | 0   | 0  | 0  | 0   | 24  | 20  |
| 0  | 0   | 0  | 0  | 0   | 20  | 10  |
| 0  | 0   | 0  | 0  | 0   | 0   | 0   |

|     |     |     |     |     |     |     |
|-----|-----|-----|-----|-----|-----|-----|
| 0   | 0   | 0   | 0   | 0   | 10  | 0   |
| 0   | 0   | 0   | 0   | 0   | 0   | 0   |
| 0   | 237 | 0   | 0   | 0   | 44  | 0   |
| 0   | 26  | 0   | 10  | 0   | 0   | 0   |
| 0   | 58  | 0   | 0   | 0   | 0   | 0   |
| 0   | 168 | 130 | 0   | 10  | 0   | 0   |
| 0   | 0   | 0   | 0   | 0   | 0   | 0   |
| 0   | 18  | 0   | 0   | 0   | 73  | 0   |
| 0   | 140 | 24  | 20  | 40  | 44  | 0   |
| 0   | 109 | 0   | 0   | 0   | 20  | 0   |
| 0   | 40  | 0   | 0   | 10  | 0   | 0   |
| 0   | 0   | 0   | 0   | 0   | 0   | 0   |
| 0   | 0   | 0   | 0   | 0   | 35  | 0   |
| 0   | 0   | 0   | 0   | 0   | 46  | 0   |
| 0   | 69  | 13  | 0   | 15  | 127 | 18  |
| 10  | 26  | 28  | 0   | 0   | 56  | 0   |
| 62  | 0   | 0   | 0   | 0   | 0   | 0   |
| 10  | 0   | 0   | 0   | 17  | 109 | 0   |
| 0   | 0   | 0   | 0   | 0   | 0   | 0   |
| 0   | 0   | 0   | 0   | 0   | 0   | 0   |
| 0   | 0   | 0   | 0   | 0   | 0   | 0   |
| 0   | 0   | 0   | 11  | 15  | 72  | 0   |
| 0   | 12  | 0   | 0   | 0   | 0   | 0   |
| 0   | 0   | 0   | 0   | 0   | 0   | 0   |
| 0   | 0   | 0   | 0   | 0   | 0   | 0   |
| 0   | 0   | 0   | 0   | 0   | 0   | 0   |
| 0   | 0   | 0   | 0   | 0   | 0   | 0   |
| 140 | 108 | 0   | 283 | 44  | 10  | 0   |
| 0   | 0   | 0   | 0   | 0   | 0   | 0   |
| 0   | 0   | 0   | 0   | 26  | 21  | 0   |
| 0   | 188 | 221 | 50  | 140 | 182 | 0   |
| 0   | 14  | 114 | 25  | 123 | 0   | 234 |
| 0   | 135 | 128 | 12  | 16  | 277 | 0   |
| 0   | 0   | 342 | 0   | 0   | 0   | 72  |
| 0   | 33  | 0   | 0   | 0   | 14  | 24  |
| 0   | 0   | 0   | 0   | 0   | 0   | 0   |
| 0   | 0   | 0   | 0   | 0   | 0   | 0   |
| 0   | 0   | 0   | 0   | 15  | 0   | 0   |
| 0   | 0   | 0   | 0   | 0   | 25  | 0   |
| 0   | 0   | 0   | 0   | 0   | 0   | 0   |
| 153 | 0   | 0   | 0   | 50  | 0   | 0   |
| 0   | 39  | 0   | 0   | 0   | 39  | 0   |
| 0   | 10  | 0   | 0   | 0   | 64  | 0   |
| 0   | 10  | 0   | 0   | 0   | 38  | 0   |
| 0   | 58  | 0   | 0   | 0   | 0   | 0   |
| 0   | 0   | 0   | 0   | 0   | 0   | 0   |

|     |     |     |    |     |     |     |
|-----|-----|-----|----|-----|-----|-----|
| 0   | 50  | 0   | 0  | 23  | 10  | 0   |
| 0   | 0   | 0   | 0  | 0   | 93  | 0   |
| 0   | 0   | 0   | 0  | 0   | 0   | 0   |
| 0   | 0   | 0   | 0  | 0   | 0   | 0   |
| 0   | 20  | 40  | 21 | 14  | 81  | 0   |
| 0   | 0   | 0   | 0  | 0   | 128 | 0   |
| 14  | 0   | 0   | 0  | 0   | 12  | 11  |
| 0   | 0   | 0   | 0  | 0   | 29  | 0   |
| 69  | 0   | 0   | 0  | 128 | 0   | 0   |
| 37  | 0   | 0   | 0  | 0   | 22  | 0   |
| 0   | 0   | 0   | 0  | 0   | 0   | 0   |
| 28  | 0   | 25  | 0  | 0   | 52  | 0   |
| 0   | 0   | 0   | 0  | 0   | 0   | 0   |
| 13  | 0   | 0   | 0  | 53  | 23  | 0   |
| 0   | 0   | 28  | 0  | 0   | 49  | 20  |
| 0   | 17  | 0   | 0  | 11  | 143 | 0   |
| 0   | 0   | 0   | 0  | 0   | 0   | 0   |
| 0   | 0   | 0   | 0  | 0   | 0   | 0   |
| 100 | 30  | 0   | 69 | 0   | 0   | 0   |
| 0   | 0   | 0   | 0  | 0   | 0   | 0   |
| 0   | 0   | 0   | 0  | 0   | 0   | 0   |
| 11  | 0   | 0   | 0  | 0   | 38  | 0   |
| 126 | 17  | 0   | 0  | 0   | 0   | 0   |
| 0   | 37  | 0   | 0  | 0   | 0   | 0   |
| 0   | 20  | 57  | 24 | 0   | 0   | 12  |
| 0   | 0   | 0   | 0  | 0   | 10  | 0   |
| 0   | 0   | 0   | 0  | 0   | 0   | 0   |
| 0   | 0   | 0   | 0  | 0   | 0   | 0   |
| 0   | 28  | 0   | 0  | 0   | 0   | 0   |
| 0   | 36  | 0   | 0  | 0   | 0   | 0   |
| 0   | 0   | 31  | 0  | 0   | 0   | 0   |
| 0   | 83  | 0   | 0  | 0   | 0   | 0   |
| 0   | 26  | 26  | 0  | 10  | 0   | 0   |
| 0   | 64  | 0   | 0  | 0   | 0   | 0   |
| 0   | 0   | 0   | 0  | 0   | 0   | 0   |
| 0   | 262 | 218 | 0  | 0   | 0   | 267 |
| 0   | 83  | 29  | 0  | 0   | 0   | 46  |
| 0   | 39  | 0   | 0  | 0   | 0   | 0   |
| 0   | 0   | 0   | 0  | 0   | 0   | 0   |
| 0   | 0   | 0   | 0  | 11  | 0   | 0   |
| 0   | 0   | 0   | 0  | 0   | 0   | 0   |
| 0   | 0   | 0   | 0  | 0   | 0   | 0   |
| 0   | 0   | 0   | 0  | 0   | 0   | 0   |
| 0   | 0   | 0   | 0  | 10  | 0   | 0   |
| 10  | 0   | 0   | 0  | 0   | 0   | 0   |
| 0   | 0   | 0   | 0  | 0   | 54  | 0   |



|     |      |     |     |     |     |    |
|-----|------|-----|-----|-----|-----|----|
| 0   | 0    | 0   | 0   | 0   | 0   | 11 |
| 0   | 0    | 0   | 0   | 0   | 0   | 0  |
| 15  | 11   | 0   | 0   | 0   | 0   | 0  |
| 0   | 79   | 58  | 61  | 16  | 16  | 0  |
| 416 | 0    | 10  | 0   | 0   | 26  | 0  |
| 0   | 0    | 10  | 0   | 0   | 0   | 0  |
| 0   | 27   | 0   | 0   | 0   | 0   | 0  |
| 0   | 0    | 18  | 0   | 0   | 0   | 0  |
| 0   | 0    | 0   | 0   | 0   | 38  | 0  |
| 0   | 35   | 0   | 0   | 0   | 0   | 0  |
| 0   | 0    | 0   | 0   | 0   | 0   | 0  |
| 0   | 0    | 0   | 0   | 0   | 14  | 0  |
| 0   | 0    | 0   | 0   | 0   | 0   | 0  |
| 0   | 0    | 0   | 12  | 0   | 0   | 0  |
| 0   | 55   | 0   | 183 | 0   | 0   | 0  |
| 0   | 0    | 0   | 0   | 0   | 0   | 0  |
| 0   | 0    | 0   | 0   | 22  | 0   | 0  |
| 0   | 0    | 0   | 0   | 0   | 0   | 0  |
| 0   | 0    | 0   | 0   | 82  | 45  | 0  |
| 0   | 0    | 0   | 12  | 0   | 22  | 0  |
| 0   | 0    | 0   | 0   | 0   | 0   | 0  |
| 0   | 67   | 0   | 0   | 0   | 0   | 0  |
| 0   | 0    | 0   | 0   | 0   | 13  | 0  |
| 0   | 0    | 0   | 0   | 0   | 13  | 0  |
| 31  | 0    | 0   | 0   | 0   | 0   | 0  |
| 195 | 11   | 0   | 0   | 0   | 0   | 0  |
| 108 | 0    | 0   | 13  | 0   | 0   | 0  |
| 0   | 0    | 0   | 0   | 0   | 0   | 0  |
| 0   | 0    | 0   | 0   | 0   | 0   | 0  |
| 0   | 10   | 0   | 0   | 0   | 266 | 0  |
| 0   | 0    | 0   | 0   | 0   | 0   | 0  |
| 0   | 0    | 0   | 0   | 0   | 0   | 0  |
| 0   | 0    | 0   | 0   | 0   | 0   | 0  |
| 22  | 143  | 24  | 109 | 0   | 195 | 0  |
| 0   | 0    | 0   | 0   | 0   | 0   | 0  |
| 0   | 0    | 0   | 11  | 0   | 149 | 0  |
| 0   | 0    | 0   | 0   | 0   | 0   | 0  |
| 0   | 0    | 0   | 0   | 0   | 0   | 0  |
| 0   | 0    | 0   | 10  | 70  | 0   | 0  |
| 0   | 0    | 0   | 0   | 0   | 0   | 34 |
| 134 | 2274 | 202 | 0   | 240 | 28  | 34 |
| 0   | 0    | 0   | 0   | 0   | 0   | 0  |
| 0   | 0    | 0   | 0   | 0   | 0   | 0  |
| 0   | 0    | 0   | 0   | 0   | 0   | 0  |
| 0   | 0    | 0   | 0   | 0   | 0   | 0  |
| 0   | 0    | 0   | 0   | 49  | 0   | 0  |

|     |     |     |    |     |     |     |
|-----|-----|-----|----|-----|-----|-----|
| 38  | 0   | 0   | 0  | 0   | 467 | 0   |
| 11  | 0   | 0   | 0  | 0   | 0   | 0   |
| 0   | 0   | 0   | 0  | 0   | 0   | 0   |
| 86  | 0   | 0   | 0  | 0   | 0   | 0   |
| 35  | 0   | 0   | 0  | 0   | 0   | 0   |
| 0   | 0   | 0   | 0  | 0   | 0   | 0   |
| 0   | 37  | 10  | 0  | 0   | 0   | 13  |
| 0   | 105 | 0   | 0  | 0   | 0   | 0   |
| 0   | 15  | 0   | 0  | 0   | 0   | 28  |
| 0   | 388 | 108 | 0  | 10  | 73  | 37  |
| 0   | 0   | 0   | 0  | 0   | 0   | 0   |
| 0   | 0   | 0   | 0  | 0   | 0   | 0   |
| 0   | 53  | 0   | 0  | 0   | 35  | 0   |
| 0   | 11  | 0   | 0  | 0   | 27  | 0   |
| 0   | 0   | 0   | 0  | 0   | 0   | 0   |
| 0   | 0   | 0   | 0  | 0   | 0   | 0   |
| 0   | 23  | 0   | 0  | 32  | 0   | 0   |
| 0   | 37  | 0   | 0  | 0   | 0   | 18  |
| 0   | 178 | 307 | 91 | 27  | 0   | 108 |
| 48  | 51  | 63  | 55 | 0   | 0   | 0   |
| 0   | 147 | 52  | 40 | 12  | 0   | 0   |
| 0   | 0   | 0   | 0  | 28  | 0   | 0   |
| 0   | 0   | 0   | 0  | 0   | 0   | 0   |
| 0   | 0   | 0   | 0  | 0   | 0   | 0   |
| 0   | 0   | 0   | 0  | 0   | 0   | 0   |
| 13  | 0   | 0   | 0  | 0   | 0   | 0   |
| 0   | 189 | 10  | 38 | 23  | 0   | 0   |
| 17  | 60  | 0   | 0  | 0   | 0   | 0   |
| 0   | 0   | 0   | 0  | 0   | 0   | 0   |
| 171 | 0   | 0   | 0  | 0   | 0   | 0   |
| 0   | 0   | 0   | 0  | 0   | 0   | 0   |
| 0   | 0   | 0   | 0  | 0   | 0   | 0   |
| 0   | 0   | 0   | 10 | 0   | 11  | 32  |
| 0   | 0   | 0   | 0  | 0   | 0   | 26  |
| 0   | 0   | 145 | 36 | 0   | 0   | 0   |
| 0   | 51  | 423 | 44 | 0   | 39  | 288 |
| 0   | 0   | 0   | 0  | 0   | 0   | 0   |
| 0   | 0   | 0   | 0  | 13  | 0   | 0   |
| 0   | 0   | 0   | 0  | 0   | 0   | 0   |
| 0   | 0   | 0   | 0  | 0   | 0   | 0   |
| 0   | 0   | 0   | 0  | 0   | 0   | 0   |
| 0   | 23  | 0   | 0  | 0   | 0   | 0   |
| 0   | 0   | 0   | 0  | 92  | 0   | 0   |
| 0   | 0   | 0   | 0  | 0   | 0   | 0   |
| 0   | 0   | 0   | 0  | 72  | 0   | 0   |
| 0   | 34  | 0   | 0  | 343 | 0   | 0   |

|    |     |     |    |     |     |     |
|----|-----|-----|----|-----|-----|-----|
| 0  | 0   | 0   | 0  | 0   | 0   | 0   |
| 0  | 0   | 0   | 0  | 0   | 0   | 0   |
| 0  | 0   | 0   | 0  | 0   | 0   | 0   |
| 0  | 0   | 0   | 0  | 0   | 0   | 0   |
| 0  | 0   | 0   | 0  | 10  | 0   | 0   |
| 0  | 0   | 0   | 0  | 0   | 0   | 0   |
| 0  | 0   | 0   | 0  | 0   | 0   | 0   |
| 0  | 0   | 0   | 0  | 0   | 0   | 0   |
| 0  | 0   | 0   | 0  | 0   | 0   | 0   |
| 0  | 0   | 0   | 14 | 30  | 0   | 0   |
| 0  | 0   | 0   | 11 | 0   | 22  | 0   |
| 0  | 430 | 573 | 81 | 0   | 304 | 0   |
| 0  | 0   | 0   | 0  | 120 | 0   | 0   |
| 13 | 315 | 84  | 12 | 573 | 0   | 0   |
| 94 | 61  | 611 | 0  | 50  | 0   | 289 |
| 0  | 0   | 0   | 0  | 0   | 0   | 0   |
| 0  | 10  | 0   | 0  | 0   | 0   | 0   |
| 0  | 0   | 0   | 0  | 0   | 0   | 0   |
| 0  | 0   | 0   | 0  | 53  | 0   | 0   |
| 0  | 0   | 0   | 0  | 0   | 0   | 0   |
| 0  | 0   | 0   | 0  | 0   | 0   | 0   |
| 0  | 45  | 0   | 0  | 0   | 0   | 0   |
| 0  | 0   | 0   | 0  | 0   | 0   | 0   |
| 0  | 0   | 0   | 0  | 41  | 0   | 0   |
| 0  | 0   | 0   | 0  | 0   | 0   | 0   |
| 0  | 0   | 0   | 0  | 0   | 0   | 0   |
| 0  | 0   | 0   | 0  | 0   | 0   | 0   |
| 0  | 0   | 0   | 0  | 0   | 0   | 0   |
| 0  | 0   | 0   | 0  | 47  | 10  | 0   |
| 0  | 22  | 10  | 0  | 32  | 82  | 0   |
| 0  | 0   | 0   | 0  | 0   | 0   | 0   |
| 0  | 0   | 0   | 0  | 59  | 0   | 0   |
| 0  | 0   | 0   | 0  | 18  | 0   | 0   |
| 0  | 0   | 0   | 0  | 0   | 0   | 0   |
| 0  | 39  | 0   | 0  | 0   | 0   | 0   |
| 0  | 30  | 22  | 0  | 0   | 0   | 0   |
| 0  | 0   | 0   | 0  | 38  | 0   | 0   |
| 0  | 0   | 0   | 0  | 35  | 0   | 0   |
| 0  | 0   | 0   | 0  | 23  | 0   | 0   |
| 0  | 0   | 0   | 0  | 0   | 0   | 0   |
| 0  | 0   | 0   | 0  | 11  | 0   | 0   |
| 0  | 0   | 0   | 0  | 11  | 0   | 0   |
| 15 | 0   | 0   | 0  | 31  | 0   | 0   |
| 0  | 0   | 0   | 0  | 0   | 0   | 0   |
| 0  | 0   | 0   | 0  | 30  | 0   | 0   |
| 0  | 0   | 0   | 0  | 0   | 0   | 0   |

|   |     |    |   |     |     |     |
|---|-----|----|---|-----|-----|-----|
| 0 | 10  | 0  | 0 | 32  | 0   | 0   |
| 0 | 28  | 0  | 0 | 41  | 0   | 0   |
| 0 | 0   | 0  | 0 | 0   | 0   | 0   |
| 0 | 0   | 0  | 0 | 10  | 0   | 0   |
| 0 | 0   | 0  | 0 | 10  | 0   | 0   |
| 0 | 11  | 0  | 0 | 44  | 10  | 0   |
| 0 | 0   | 0  | 0 | 0   | 0   | 0   |
| 0 | 0   | 0  | 0 | 0   | 0   | 0   |
| 0 | 63  | 0  | 0 | 14  | 0   | 12  |
| 0 | 0   | 0  | 0 | 0   | 0   | 0   |
| 0 | 0   | 0  | 0 | 27  | 0   | 0   |
| 0 | 0   | 0  | 0 | 0   | 0   | 0   |
| 0 | 11  | 0  | 0 | 0   | 0   | 0   |
| 0 | 79  | 0  | 0 | 0   | 0   | 184 |
| 0 | 0   | 0  | 0 | 0   | 0   | 0   |
| 0 | 0   | 0  | 0 | 0   | 0   | 0   |
| 0 | 115 | 83 | 0 | 0   | 0   | 432 |
| 0 | 0   | 0  | 0 | 22  | 0   | 0   |
| 0 | 0   | 0  | 0 | 0   | 0   | 0   |
| 0 | 27  | 0  | 0 | 0   | 12  | 0   |
| 0 | 21  | 0  | 0 | 0   | 0   | 0   |
| 0 | 0   | 0  | 0 | 0   | 0   | 0   |
| 0 | 0   | 0  | 0 | 0   | 0   | 0   |
| 0 | 0   | 0  | 0 | 126 | 0   | 0   |
| 0 | 0   | 0  | 0 | 186 | 0   | 0   |
| 0 | 0   | 0  | 0 | 52  | 0   | 0   |
| 0 | 0   | 0  | 0 | 0   | 0   | 0   |
| 0 | 0   | 0  | 0 | 11  | 0   | 0   |
| 0 | 0   | 0  | 0 | 0   | 0   | 0   |
| 0 | 0   | 0  | 0 | 0   | 400 | 0   |
| 0 | 0   | 0  | 0 | 11  | 0   | 0   |
| 0 | 0   | 0  | 0 | 0   | 21  | 0   |
| 0 | 0   | 0  | 0 | 0   | 0   | 0   |
| 0 | 0   | 0  | 0 | 61  | 0   | 0   |
| 0 | 0   | 0  | 0 | 0   | 0   | 0   |
| 0 | 0   | 0  | 0 | 18  | 0   | 0   |
| 0 | 0   | 0  | 0 | 0   | 0   | 0   |
| 0 | 0   | 0  | 0 | 0   | 0   | 0   |
| 0 | 0   | 0  | 0 | 0   | 0   | 0   |
| 0 | 55  | 0  | 0 | 49  | 45  | 0   |
| 0 | 0   | 0  | 0 | 11  | 0   | 0   |
| 0 | 0   | 0  | 0 | 0   | 0   | 0   |
| 0 | 16  | 0  | 0 | 0   | 0   | 0   |
| 0 | 0   | 0  | 0 | 0   | 0   | 0   |
| 0 | 0   | 0  | 0 | 0   | 0   | 0   |
| 0 | 79  | 0  | 0 | 0   | 0   | 0   |

|    |     |    |    |    |     |   |
|----|-----|----|----|----|-----|---|
| 0  | 27  | 0  | 0  | 0  | 0   | 0 |
| 0  | 32  | 0  | 0  | 0  | 0   | 0 |
| 0  | 0   | 0  | 0  | 0  | 10  | 0 |
| 0  | 0   | 0  | 0  | 0  | 40  | 0 |
| 0  | 0   | 0  | 0  | 0  | 0   | 0 |
| 0  | 0   | 0  | 0  | 0  | 0   | 0 |
| 0  | 0   | 0  | 0  | 0  | 0   | 0 |
| 0  | 0   | 0  | 0  | 0  | 0   | 0 |
| 18 | 25  | 0  | 0  | 0  | 0   | 0 |
| 0  | 0   | 0  | 0  | 0  | 0   | 0 |
| 0  | 0   | 0  | 0  | 0  | 0   | 0 |
| 0  | 0   | 0  | 0  | 0  | 156 | 0 |
| 0  | 0   | 0  | 0  | 0  | 20  | 0 |
| 0  | 0   | 0  | 0  | 0  | 89  | 0 |
| 0  | 0   | 0  | 0  | 0  | 0   | 0 |
| 0  | 0   | 0  | 0  | 0  | 0   | 0 |
| 0  | 0   | 0  | 0  | 0  | 118 | 0 |
| 52 | 0   | 0  | 0  | 0  | 0   | 0 |
| 0  | 0   | 0  | 0  | 0  | 0   | 0 |
| 0  | 0   | 0  | 0  | 0  | 0   | 0 |
| 0  | 0   | 0  | 0  | 0  | 366 | 0 |
| 0  | 0   | 15 | 0  | 0  | 0   | 0 |
| 0  | 0   | 0  | 0  | 0  | 0   | 0 |
| 0  | 11  | 0  | 0  | 0  | 0   | 0 |
| 0  | 0   | 0  | 0  | 0  | 10  | 0 |
| 0  | 0   | 0  | 0  | 0  | 63  | 0 |
| 0  | 0   | 0  | 0  | 0  | 0   | 0 |
| 0  | 0   | 0  | 0  | 0  | 0   | 0 |
| 0  | 80  | 0  | 0  | 0  | 0   | 0 |
| 0  | 18  | 0  | 0  | 0  | 0   | 0 |
| 0  | 0   | 0  | 28 | 0  | 61  | 0 |
| 0  | 0   | 0  | 0  | 0  | 0   | 0 |
| 0  | 0   | 11 | 0  | 0  | 0   | 0 |
| 0  | 111 | 0  | 13 | 0  | 0   | 0 |
| 0  | 97  | 0  | 23 | 0  | 0   | 0 |
| 0  | 65  | 0  | 0  | 0  | 0   | 0 |
| 0  | 462 | 0  | 0  | 0  | 0   | 0 |
| 0  | 0   | 0  | 0  | 0  | 0   | 0 |
| 0  | 87  | 0  | 0  | 0  | 0   | 0 |
| 0  | 0   | 0  | 0  | 28 | 415 | 0 |
| 0  | 0   | 0  | 0  | 0  | 0   | 0 |
| 0  | 0   | 0  | 0  | 0  | 0   | 0 |
| 0  | 67  | 0  | 10 | 0  | 0   | 0 |
| 0  | 0   | 0  | 0  | 0  | 330 | 0 |
| 0  | 0   | 0  | 0  | 0  | 0   | 0 |
| 0  | 0   | 0  | 0  | 0  | 0   | 0 |

|    |      |       |    |    |     |      |
|----|------|-------|----|----|-----|------|
| 0  | 0    | 0     | 0  | 0  | 0   | 0    |
| 0  | 10   | 40    | 0  | 0  | 66  | 0    |
| 0  | 0    | 15    | 0  | 31 | 13  | 0    |
| 0  | 11   | 0     | 0  | 0  | 108 | 0    |
| 0  | 116  | 0     | 0  | 0  | 0   | 0    |
| 0  | 0    | 0     | 0  | 0  | 0   | 0    |
| 0  | 0    | 0     | 0  | 0  | 0   | 0    |
| 0  | 0    | 0     | 0  | 0  | 0   | 0    |
| 0  | 12   | 0     | 0  | 0  | 0   | 0    |
| 0  | 0    | 0     | 0  | 0  | 0   | 0    |
| 0  | 0    | 0     | 0  | 0  | 0   | 0    |
| 0  | 22   | 0     | 0  | 0  | 14  | 0    |
| 0  | 0    | 0     | 0  | 0  | 0   | 0    |
| 0  | 0    | 0     | 0  | 0  | 0   | 0    |
| 0  | 0    | 12    | 0  | 25 | 0   | 0    |
| 0  | 11   | 0     | 0  | 0  | 0   | 0    |
| 0  | 0    | 0     | 0  | 12 | 0   | 0    |
| 0  | 0    | 0     | 0  | 0  | 0   | 0    |
| 0  | 33   | 0     | 11 | 13 | 0   | 0    |
| 0  | 74   | 21    | 16 | 32 | 50  | 0    |
| 0  | 0    | 0     | 0  | 0  | 0   | 0    |
| 0  | 0    | 0     | 0  | 0  | 0   | 0    |
| 0  | 952  | 6065  | 0  | 0  | 0   | 950  |
| 0  | 1385 | 15719 | 0  | 20 | 0   | 2122 |
| 0  | 0    | 0     | 0  | 0  | 0   | 0    |
| 0  | 0    | 0     | 0  | 0  | 0   | 0    |
| 0  | 0    | 0     | 0  | 0  | 0   | 0    |
| 0  | 0    | 0     | 0  | 0  | 0   | 0    |
| 0  | 0    | 0     | 0  | 0  | 0   | 0    |
| 0  | 0    | 0     | 0  | 0  | 0   | 0    |
| 0  | 45   | 0     | 0  | 0  | 10  | 0    |
| 0  | 0    | 0     | 0  | 0  | 0   | 0    |
| 0  | 33   | 0     | 10 | 0  | 0   | 0    |
| 30 | 25   | 0     | 0  | 0  | 0   | 14   |
| 0  | 66   | 0     | 0  | 0  | 0   | 10   |
| 0  | 84   | 0     | 0  | 0  | 0   | 10   |
| 0  | 27   | 0     | 0  | 0  | 0   | 28   |
| 0  | 132  | 10    | 41 | 0  | 0   | 67   |
| 0  | 0    | 33    | 0  | 0  | 0   | 30   |
| 0  | 44   | 0     | 0  | 0  | 0   | 0    |
| 0  | 0    | 0     | 0  | 0  | 0   | 10   |
| 0  | 350  | 0     | 0  | 0  | 0   | 0    |
| 0  | 0    | 0     | 0  | 0  | 0   | 0    |
| 0  | 0    | 0     | 0  | 0  | 0   | 25   |
| 0  | 52   | 0     | 0  | 43 | 0   | 10   |
| 15 | 393  | 0     | 0  | 0  | 0   | 109  |

[illegible]

|    |     |     |    |    |      |     |
|----|-----|-----|----|----|------|-----|
| 0  | 0   | 0   | 0  | 0  | 0    | 0   |
| 0  | 14  | 0   | 0  | 0  | 0    | 0   |
| 0  | 0   | 20  | 0  | 0  | 0    | 0   |
| 0  | 34  | 0   | 0  | 0  | 0    | 0   |
| 0  | 45  | 0   | 0  | 0  | 0    | 0   |
| 0  | 62  | 0   | 0  | 0  | 0    | 0   |
| 0  | 12  | 0   | 0  | 0  | 0    | 0   |
| 0  | 15  | 188 | 0  | 0  | 0    | 83  |
| 0  | 11  | 0   | 0  | 0  | 0    | 0   |
| 0  | 20  | 0   | 0  | 0  | 0    | 0   |
| 0  | 11  | 0   | 0  | 0  | 0    | 0   |
| 0  | 28  | 0   | 0  | 0  | 0    | 0   |
| 0  | 18  | 0   | 0  | 0  | 0    | 0   |
| 0  | 28  | 0   | 0  | 0  | 0    | 0   |
| 0  | 12  | 0   | 0  | 0  | 0    | 0   |
| 0  | 74  | 0   | 0  | 0  | 0    | 0   |
| 0  | 13  | 0   | 0  | 0  | 0    | 0   |
| 0  | 17  | 370 | 0  | 0  | 0    | 167 |
| 0  | 10  | 0   | 0  | 0  | 0    | 0   |
| 0  | 76  | 0   | 0  | 0  | 0    | 0   |
| 0  | 10  | 0   | 0  | 0  | 0    | 0   |
| 0  | 10  | 0   | 0  | 0  | 0    | 0   |
| 0  | 10  | 0   | 0  | 0  | 0    | 0   |
| 0  | 170 | 326 | 10 | 92 | 10   | 0   |
| 10 | 12  | 0   | 13 | 0  | 0    | 0   |
| 0  | 11  | 0   | 0  | 0  | 32   | 0   |
| 0  | 22  | 0   | 0  | 0  | 0    | 0   |
| 0  | 55  | 0   | 0  | 0  | 42   | 0   |
| 0  | 24  | 0   | 0  | 0  | 38   | 0   |
| 0  | 398 | 13  | 42 | 0  | 190  | 0   |
| 0  | 21  | 0   | 0  | 0  | 10   | 0   |
| 47 | 11  | 0   | 0  | 0  | 0    | 0   |
| 0  | 10  | 0   | 0  | 0  | 0    | 0   |
| 0  | 100 | 0   | 0  | 0  | 1511 | 0   |
| 0  | 22  | 0   | 0  | 0  | 267  | 0   |
| 0  | 117 | 0   | 0  | 0  | 0    | 0   |
| 0  | 10  | 0   | 0  | 0  | 0    | 0   |
| 0  | 47  | 29  | 0  | 0  | 0    | 119 |
| 0  | 46  | 0   | 0  | 0  | 0    | 0   |
| 0  | 105 | 242 | 0  | 0  | 0    | 130 |
| 0  | 31  | 0   | 0  | 0  | 0    | 0   |
| 0  | 10  | 0   | 0  | 0  | 0    | 0   |
| 0  | 30  | 0   | 0  | 0  | 0    | 0   |
| 0  | 49  | 0   | 0  | 0  | 0    | 0   |
| 0  | 42  | 0   | 0  | 0  | 0    | 0   |
| 0  | 40  | 0   | 0  | 0  | 0    | 0   |



|   |      |     |    |     |    |    |
|---|------|-----|----|-----|----|----|
| 0 | 32   | 0   | 0  | 125 | 70 | 10 |
| 0 | 306  | 0   | 0  | 0   | 0  | 0  |
| 0 | 65   | 0   | 0  | 0   | 0  | 0  |
| 0 | 10   | 0   | 0  | 0   | 0  | 0  |
| 0 | 10   | 49  | 0  | 0   | 47 | 68 |
| 0 | 64   | 356 | 11 | 28  | 0  | 0  |
| 0 | 13   | 0   | 0  | 0   | 0  | 0  |
| 0 | 47   | 0   | 0  | 0   | 0  | 0  |
| 0 | 15   | 0   | 0  | 0   | 0  | 0  |
| 0 | 104  | 0   | 0  | 0   | 0  | 0  |
| 0 | 944  | 0   | 0  | 0   | 0  | 0  |
| 0 | 12   | 0   | 0  | 0   | 0  | 0  |
| 0 | 30   | 0   | 0  | 0   | 0  | 0  |
| 0 | 1159 | 0   | 0  | 0   | 0  | 0  |
| 0 | 3156 | 0   | 0  | 0   | 0  | 0  |
| 0 | 10   | 0   | 0  | 0   | 0  | 0  |
| 0 | 14   | 0   | 0  | 0   | 0  | 0  |
| 0 | 12   | 0   | 0  | 0   | 0  | 0  |
| 0 | 10   | 0   | 0  | 0   | 0  | 0  |
| 0 | 24   | 0   | 0  | 0   | 0  | 0  |
| 0 | 14   | 0   | 0  | 0   | 0  | 0  |
| 0 | 15   | 0   | 0  | 10  | 0  | 0  |
| 0 | 48   | 0   | 0  | 38  | 0  | 0  |
| 0 | 64   | 0   | 0  | 0   | 0  | 0  |
| 0 | 13   | 0   | 0  | 0   | 0  | 0  |
| 0 | 137  | 0   | 0  | 0   | 0  | 0  |
| 0 | 53   | 154 | 0  | 0   | 0  | 0  |
| 0 | 39   | 36  | 0  | 0   | 0  | 14 |
| 0 | 11   | 0   | 0  | 0   | 0  | 0  |
| 0 | 10   | 0   | 0  | 0   | 15 | 0  |
| 0 | 23   | 0   | 0  | 0   | 0  | 0  |
| 0 | 26   | 0   | 0  | 0   | 0  | 0  |
| 0 | 14   | 0   | 0  | 0   | 0  | 0  |
| 0 | 23   | 0   | 0  | 0   | 0  | 0  |
| 0 | 11   | 0   | 0  | 0   | 0  | 11 |
| 0 | 15   | 0   | 0  | 0   | 0  | 0  |
| 0 | 50   | 0   | 0  | 0   | 0  | 13 |
| 0 | 12   | 0   | 0  | 0   | 0  | 0  |
| 0 | 12   | 0   | 0  | 0   | 0  | 0  |
| 0 | 13   | 0   | 0  | 0   | 0  | 0  |
| 0 | 11   | 0   | 0  | 0   | 0  | 0  |
| 0 | 13   | 0   | 0  | 0   | 0  | 0  |
| 0 | 10   | 0   | 0  | 0   | 0  | 0  |
| 0 | 37   | 0   | 0  | 0   | 0  | 0  |
| 0 | 10   | 0   | 0  | 0   | 0  | 0  |
| 0 | 29   | 0   | 0  | 0   | 0  | 0  |

[illegible]

|     |   |     |   |    |     |     |
|-----|---|-----|---|----|-----|-----|
| 0   | 0 | 0   | 0 | 0  | 16  | 0   |
| 0   | 0 | 0   | 0 | 18 | 0   | 0   |
| 0   | 0 | 0   | 0 | 0  | 0   | 0   |
| 0   | 0 | 0   | 0 | 0  | 0   | 0   |
| 0   | 0 | 46  | 0 | 0  | 60  | 0   |
| 0   | 0 | 0   | 0 | 0  | 0   | 0   |
| 0   | 0 | 0   | 0 | 0  | 15  | 13  |
| 0   | 0 | 0   | 0 | 0  | 16  | 0   |
| 0   | 0 | 12  | 0 | 0  | 0   | 0   |
| 0   | 0 | 103 | 0 | 0  | 0   | 907 |
| 0   | 0 | 0   | 0 | 0  | 37  | 0   |
| 0   | 0 | 0   | 0 | 0  | 0   | 0   |
| 0   | 0 | 0   | 0 | 0  | 10  | 0   |
| 0   | 0 | 0   | 0 | 12 | 0   | 0   |
| 0   | 0 | 0   | 0 | 0  | 0   | 0   |
| 0   | 0 | 0   | 0 | 0  | 0   | 0   |
| 52  | 0 | 0   | 0 | 0  | 0   | 0   |
| 0   | 0 | 0   | 0 | 0  | 0   | 0   |
| 0   | 0 | 0   | 0 | 0  | 0   | 0   |
| 0   | 0 | 0   | 0 | 0  | 34  | 0   |
| 0   | 0 | 0   | 0 | 0  | 0   | 0   |
| 0   | 0 | 0   | 0 | 0  | 0   | 0   |
| 0   | 0 | 0   | 0 | 0  | 39  | 0   |
| 0   | 0 | 0   | 0 | 0  | 0   | 0   |
| 0   | 0 | 0   | 0 | 0  | 13  | 0   |
| 0   | 0 | 0   | 0 | 0  | 0   | 0   |
| 102 | 0 | 0   | 0 | 0  | 0   | 0   |
| 0   | 0 | 0   | 0 | 38 | 751 | 0   |
| 0   | 0 | 0   | 0 | 0  | 0   | 0   |
| 0   | 0 | 0   | 0 | 0  | 0   | 0   |
| 0   | 0 | 0   | 0 | 0  | 0   | 0   |
| 0   | 0 | 0   | 0 | 0  | 0   | 0   |
| 0   | 0 | 11  | 0 | 0  | 0   | 0   |
| 0   | 0 | 0   | 0 | 0  | 0   | 0   |
| 0   | 0 | 0   | 0 | 0  | 0   | 0   |
| 0   | 0 | 0   | 0 | 0  | 0   | 0   |
| 0   | 0 | 0   | 0 | 0  | 0   | 0   |
| 0   | 0 | 0   | 0 | 0  | 0   | 0   |
| 0   | 0 | 0   | 0 | 0  | 0   | 0   |
| 0   | 0 | 0   | 0 | 0  | 0   | 0   |
| 0   | 0 | 0   | 0 | 0  | 0   | 0   |
| 0   | 0 | 0   | 0 | 0  | 0   | 0   |
| 0   | 0 | 0   | 0 | 0  | 0   | 0   |
| 0   | 0 | 0   | 0 | 0  | 0   | 0   |
| 13  | 0 | 0   | 0 | 0  | 0   | 0   |
| 0   | 0 | 0   | 0 | 0  | 0   | 0   |
| 0   | 0 | 0   | 0 | 0  | 0   | 0   |





|   |   |    |    |    |    |     |
|---|---|----|----|----|----|-----|
| 0 | 0 | 0  | 0  | 0  | 0  | 0   |
| 0 | 0 | 0  | 0  | 0  | 0  | 0   |
| 0 | 0 | 0  | 0  | 0  | 0  | 0   |
| 0 | 0 | 0  | 0  | 0  | 0  | 0   |
| 0 | 0 | 0  | 0  | 0  | 0  | 0   |
| 0 | 0 | 0  | 0  | 0  | 0  | 0   |
| 0 | 0 | 0  | 0  | 0  | 0  | 0   |
| 0 | 0 | 0  | 0  | 0  | 0  | 0   |
| 0 | 0 | 0  | 0  | 0  | 94 | 0   |
| 0 | 0 | 0  | 0  | 0  | 0  | 0   |
| 0 | 0 | 0  | 0  | 0  | 0  | 0   |
| 0 | 0 | 0  | 0  | 0  | 0  | 0   |
| 0 | 0 | 0  | 0  | 0  | 0  | 0   |
| 0 | 0 | 0  | 0  | 0  | 0  | 0   |
| 0 | 0 | 0  | 0  | 0  | 0  | 0   |
| 0 | 0 | 0  | 0  | 0  | 0  | 0   |
| 0 | 0 | 0  | 0  | 0  | 0  | 0   |
| 0 | 0 | 0  | 0  | 0  | 0  | 0   |
| 0 | 0 | 0  | 0  | 0  | 0  | 0   |
| 0 | 0 | 26 | 0  | 0  | 23 | 31  |
| 0 | 0 | 0  | 0  | 0  | 0  | 10  |
| 0 | 0 | 0  | 0  | 0  | 0  | 26  |
| 0 | 0 | 0  | 0  | 0  | 0  | 19  |
| 0 | 0 | 0  | 0  | 0  | 0  | 11  |
| 0 | 0 | 0  | 0  | 0  | 0  | 10  |
| 0 | 0 | 33 | 0  | 0  | 0  | 72  |
| 0 | 0 | 26 | 0  | 26 | 0  | 149 |
| 0 | 0 | 0  | 0  | 0  | 0  | 27  |
| 0 | 0 | 0  | 0  | 0  | 0  | 39  |
| 0 | 0 | 0  | 0  | 0  | 0  | 10  |
| 0 | 0 | 0  | 0  | 0  | 0  | 47  |
| 0 | 0 | 0  | 0  | 0  | 0  | 28  |
| 0 | 0 | 0  | 0  | 0  | 0  | 35  |
| 0 | 0 | 0  | 0  | 0  | 0  | 23  |
| 0 | 0 | 0  | 0  | 0  | 0  | 18  |
| 0 | 0 | 0  | 0  | 0  | 30 | 35  |
| 0 | 0 | 0  | 0  | 0  | 0  | 0   |
| 0 | 0 | 0  | 33 | 0  | 0  | 0   |
| 0 | 0 | 0  | 0  | 0  | 0  | 0   |
| 0 | 0 | 0  | 0  | 0  | 0  | 0   |
| 0 | 0 | 0  | 0  | 0  | 10 | 0   |
| 0 | 0 | 0  | 0  | 0  | 0  | 0   |
| 0 | 0 | 0  | 0  | 0  | 0  | 0   |
| 0 | 0 | 0  | 0  | 0  | 0  | 0   |
| 0 | 0 | 0  | 0  | 11 | 70 | 0   |
| 0 | 0 | 0  | 0  | 0  | 44 | 0   |
| 0 | 0 | 0  | 0  | 0  | 33 | 0   |







|   |   |    |   |    |    |   |
|---|---|----|---|----|----|---|
| 0 | 0 | 0  | 0 | 0  | 0  | 0 |
| 0 | 0 | 0  | 0 | 0  | 0  | 0 |
| 0 | 0 | 0  | 0 | 0  | 0  | 0 |
| 0 | 0 | 0  | 0 | 0  | 0  | 0 |
| 0 | 0 | 0  | 0 | 0  | 0  | 0 |
| 0 | 0 | 0  | 0 | 0  | 0  | 0 |
| 0 | 0 | 0  | 0 | 0  | 12 | 0 |
| 0 | 0 | 0  | 0 | 0  | 0  | 0 |
| 0 | 0 | 0  | 0 | 0  | 0  | 0 |
| 0 | 0 | 0  | 0 | 0  | 0  | 0 |
| 0 | 0 | 0  | 0 | 0  | 61 | 0 |
| 0 | 0 | 0  | 0 | 0  | 0  | 0 |
| 0 | 0 | 0  | 0 | 0  | 0  | 0 |
| 0 | 0 | 0  | 0 | 0  | 0  | 0 |
| 0 | 0 | 0  | 0 | 0  | 11 | 0 |
| 0 | 0 | 0  | 0 | 10 | 0  | 0 |
| 0 | 0 | 0  | 0 | 0  | 0  | 0 |
| 0 | 0 | 0  | 0 | 0  | 0  | 0 |
| 0 | 0 | 0  | 0 | 0  | 0  | 0 |
| 0 | 0 | 0  | 0 | 0  | 13 | 0 |
| 0 | 0 | 0  | 0 | 0  | 0  | 0 |
| 0 | 0 | 0  | 0 | 0  | 0  | 0 |
| 0 | 0 | 15 | 0 | 0  | 0  | 0 |
| 0 | 0 | 15 | 0 | 0  | 0  | 0 |
| 0 | 0 | 0  | 0 | 0  | 0  | 0 |
| 0 | 0 | 0  | 0 | 0  | 0  | 0 |
| 0 | 0 | 23 | 0 | 0  | 0  | 0 |
| 0 | 0 | 0  | 0 | 0  | 0  | 0 |
| 0 | 0 | 0  | 0 | 0  | 0  | 0 |
| 0 | 0 | 0  | 0 | 0  | 0  | 0 |
| 0 | 0 | 0  | 0 | 0  | 0  | 0 |
| 0 | 0 | 0  | 0 | 0  | 0  | 0 |
| 0 | 0 | 0  | 0 | 0  | 0  | 0 |
| 0 | 0 | 0  | 0 | 0  | 0  | 0 |
| 0 | 0 | 0  | 0 | 0  | 0  | 0 |
| 0 | 0 | 0  | 0 | 0  | 0  | 0 |
| 0 | 0 | 0  | 0 | 0  | 0  | 0 |
| 0 | 0 | 0  | 0 | 0  | 0  | 0 |
| 0 | 0 | 0  | 0 | 0  | 10 | 0 |
| 0 | 0 | 0  | 0 | 0  | 0  | 0 |
| 0 | 0 | 0  | 0 | 0  | 0  | 0 |
| 0 | 0 | 0  | 0 | 0  | 0  | 0 |
| 0 | 0 | 0  | 0 | 0  | 0  | 0 |
| 0 | 0 | 0  | 0 | 0  | 0  | 0 |
| 0 | 0 | 0  | 0 | 0  | 0  | 0 |
| 0 | 0 | 0  | 0 | 0  | 10 | 0 |
| 0 | 0 | 0  | 0 | 0  | 26 | 0 |
| 0 | 0 | 0  | 0 | 0  | 0  | 0 |
| 0 | 0 | 0  | 0 | 0  | 0  | 0 |

[illegible]

|    |   |    |    |   |    |   |
|----|---|----|----|---|----|---|
| 0  | 0 | 0  | 0  | 0 | 0  | 0 |
| 0  | 0 | 0  | 0  | 0 | 75 | 0 |
| 0  | 0 | 0  | 0  | 0 | 0  | 0 |
| 0  | 0 | 0  | 0  | 0 | 0  | 0 |
| 0  | 0 | 0  | 0  | 0 | 0  | 0 |
| 0  | 0 | 0  | 0  | 0 | 10 | 0 |
| 0  | 0 | 0  | 0  | 0 | 0  | 0 |
| 0  | 0 | 0  | 0  | 0 | 0  | 0 |
| 0  | 0 | 0  | 0  | 0 | 0  | 0 |
| 0  | 0 | 0  | 0  | 0 | 34 | 0 |
| 0  | 0 | 0  | 0  | 0 | 0  | 0 |
| 0  | 0 | 0  | 0  | 0 | 0  | 0 |
| 0  | 0 | 0  | 0  | 0 | 0  | 0 |
| 0  | 0 | 0  | 0  | 0 | 0  | 0 |
| 0  | 0 | 0  | 0  | 0 | 0  | 0 |
| 0  | 0 | 0  | 0  | 0 | 0  | 0 |
| 0  | 0 | 0  | 0  | 0 | 0  | 0 |
| 0  | 0 | 0  | 0  | 0 | 0  | 0 |
| 0  | 0 | 0  | 0  | 0 | 0  | 0 |
| 0  | 0 | 0  | 0  | 0 | 0  | 0 |
| 0  | 0 | 0  | 0  | 0 | 0  | 0 |
| 0  | 0 | 0  | 0  | 0 | 0  | 0 |
| 0  | 0 | 0  | 0  | 0 | 0  | 0 |
| 0  | 0 | 0  | 0  | 0 | 11 | 0 |
| 12 | 0 | 0  | 0  | 0 | 0  | 0 |
| 0  | 0 | 0  | 0  | 0 | 0  | 0 |
| 0  | 0 | 0  | 0  | 0 | 0  | 0 |
| 0  | 0 | 0  | 0  | 0 | 0  | 0 |
| 0  | 0 | 0  | 0  | 0 | 0  | 0 |
| 0  | 0 | 0  | 0  | 0 | 0  | 0 |
| 0  | 0 | 0  | 0  | 0 | 0  | 0 |
| 0  | 0 | 0  | 0  | 0 | 31 | 0 |
| 0  | 0 | 0  | 0  | 0 | 0  | 0 |
| 10 | 0 | 0  | 0  | 0 | 0  | 0 |
| 0  | 0 | 0  | 0  | 0 | 0  | 0 |
| 0  | 0 | 0  | 0  | 0 | 0  | 0 |
| 0  | 0 | 0  | 0  | 0 | 0  | 0 |
| 0  | 0 | 0  | 0  | 0 | 0  | 0 |
| 0  | 0 | 0  | 0  | 0 | 0  | 0 |
| 0  | 0 | 0  | 0  | 0 | 0  | 0 |
| 0  | 0 | 0  | 0  | 0 | 0  | 0 |
| 0  | 0 | 0  | 0  | 0 | 0  | 0 |
| 0  | 0 | 0  | 0  | 0 | 0  | 0 |
| 0  | 0 | 0  | 0  | 0 | 0  | 0 |
| 0  | 0 | 0  | 0  | 0 | 0  | 0 |
| 0  | 0 | 0  | 0  | 0 | 0  | 0 |
| 0  | 0 | 44 | 12 | 0 | 0  | 0 |
| 0  | 0 | 0  | 0  | 0 | 0  | 0 |

|   |   |   |    |    |     |   |
|---|---|---|----|----|-----|---|
| 0 | 0 | 0 | 0  | 0  | 0   | 0 |
| 0 | 0 | 0 | 0  | 0  | 0   | 0 |
| 0 | 0 | 0 | 0  | 0  | 0   | 0 |
| 0 | 0 | 0 | 0  | 0  | 76  | 0 |
| 0 | 0 | 0 | 0  | 33 | 0   | 0 |
| 0 | 0 | 0 | 0  | 0  | 0   | 0 |
| 0 | 0 | 0 | 0  | 0  | 0   | 0 |
| 0 | 0 | 0 | 0  | 25 | 0   | 0 |
| 0 | 0 | 0 | 0  | 0  | 0   | 0 |
| 0 | 0 | 0 | 0  | 0  | 0   | 0 |
| 0 | 0 | 0 | 0  | 0  | 122 | 0 |
| 0 | 0 | 0 | 0  | 0  | 116 | 0 |
| 0 | 0 | 0 | 0  | 0  | 38  | 0 |
| 0 | 0 | 0 | 0  | 0  | 54  | 0 |
| 0 | 0 | 0 | 0  | 0  | 40  | 0 |
| 0 | 0 | 0 | 0  | 0  | 0   | 0 |
| 0 | 0 | 0 | 0  | 0  | 78  | 0 |
| 0 | 0 | 0 | 25 | 0  | 0   | 0 |
| 0 | 0 | 0 | 0  | 0  | 0   | 0 |
| 0 | 0 | 0 | 0  | 0  | 0   | 0 |
| 0 | 0 | 0 | 0  | 0  | 0   | 0 |
| 0 | 0 | 0 | 0  | 0  | 0   | 0 |
| 0 | 0 | 0 | 0  | 0  | 0   | 0 |
| 0 | 0 | 0 | 0  | 0  | 0   | 0 |
| 0 | 0 | 0 | 0  | 0  | 0   | 0 |
| 0 | 0 | 0 | 0  | 0  | 0   | 0 |
| 0 | 0 | 0 | 0  | 0  | 0   | 0 |
| 0 | 0 | 0 | 0  | 0  | 0   | 0 |
| 0 | 0 | 0 | 0  | 0  | 0   | 0 |
| 0 | 0 | 0 | 0  | 0  | 0   | 0 |
| 0 | 0 | 0 | 0  | 0  | 0   | 0 |
| 0 | 0 | 0 | 0  | 0  | 22  | 0 |
| 0 | 0 | 0 | 0  | 0  | 11  | 0 |
| 0 | 0 | 0 | 0  | 0  | 24  | 0 |
| 0 | 0 | 0 | 0  | 0  | 27  | 0 |
| 0 | 0 | 0 | 0  | 0  | 31  | 0 |
| 0 | 0 | 0 | 0  | 0  | 38  | 0 |
| 0 | 0 | 0 | 0  | 0  | 113 | 0 |
| 0 | 0 | 0 | 0  | 0  | 13  | 0 |
| 0 | 0 | 0 | 0  | 0  | 30  | 0 |
| 0 | 0 | 0 | 0  | 0  | 271 | 0 |
| 0 | 0 | 0 | 0  | 0  | 104 | 0 |
| 0 | 0 | 0 | 0  | 0  | 12  | 0 |
| 0 | 0 | 0 | 0  | 0  | 63  | 0 |
| 0 | 0 | 0 | 0  | 0  | 24  | 0 |
| 0 | 0 | 0 | 0  | 0  | 12  | 0 |
| 0 | 0 | 0 | 0  | 0  | 42  | 0 |
| 0 | 0 | 0 | 0  | 0  | 32  | 0 |

|   |   |   |    |   |     |   |
|---|---|---|----|---|-----|---|
| 0 | 0 | 0 | 0  | 0 | 10  | 0 |
| 0 | 0 | 0 | 0  | 0 | 44  | 0 |
| 0 | 0 | 0 | 0  | 0 | 12  | 0 |
| 0 | 0 | 0 | 0  | 0 | 158 | 0 |
| 0 | 0 | 0 | 0  | 0 | 27  | 0 |
| 0 | 0 | 0 | 0  | 0 | 97  | 0 |
| 0 | 0 | 0 | 0  | 0 | 28  | 0 |
| 0 | 0 | 0 | 0  | 0 | 26  | 0 |
| 0 | 0 | 0 | 0  | 0 | 13  | 0 |
| 0 | 0 | 0 | 0  | 0 | 31  | 0 |
| 0 | 0 | 0 | 0  | 0 | 75  | 0 |
| 0 | 0 | 0 | 0  | 0 | 36  | 0 |
| 0 | 0 | 0 | 0  | 0 | 72  | 0 |
| 0 | 0 | 0 | 0  | 0 | 29  | 0 |
| 0 | 0 | 0 | 0  | 0 | 21  | 0 |
| 0 | 0 | 0 | 0  | 0 | 73  | 0 |
| 0 | 0 | 0 | 0  | 0 | 30  | 0 |
| 0 | 0 | 0 | 0  | 0 | 11  | 0 |
| 0 | 0 | 0 | 0  | 0 | 129 | 0 |
| 0 | 0 | 0 | 0  | 0 | 20  | 0 |
| 0 | 0 | 0 | 0  | 0 | 77  | 0 |
| 0 | 0 | 0 | 0  | 0 | 43  | 0 |
| 0 | 0 | 0 | 0  | 0 | 105 | 0 |
| 0 | 0 | 0 | 0  | 0 | 12  | 0 |
| 0 | 0 | 0 | 0  | 0 | 22  | 0 |
| 0 | 0 | 0 | 0  | 0 | 24  | 0 |
| 0 | 0 | 0 | 0  | 0 | 45  | 0 |
| 0 | 0 | 0 | 0  | 0 | 10  | 0 |
| 0 | 0 | 0 | 0  | 0 | 50  | 0 |
| 0 | 0 | 0 | 0  | 0 | 12  | 0 |
| 0 | 0 | 0 | 0  | 0 | 24  | 0 |
| 0 | 0 | 0 | 0  | 0 | 10  | 0 |
| 0 | 0 | 0 | 0  | 0 | 41  | 0 |
| 0 | 0 | 0 | 0  | 0 | 37  | 0 |
| 0 | 0 | 0 | 0  | 0 | 102 | 0 |
| 0 | 0 | 0 | 0  | 0 | 66  | 0 |
| 0 | 0 | 0 | 13 | 0 | 79  | 0 |
| 0 | 0 | 0 | 0  | 0 | 125 | 0 |
| 0 | 0 | 0 | 0  | 0 | 32  | 0 |
| 0 | 0 | 0 | 0  | 0 | 16  | 0 |
| 0 | 0 | 0 | 0  | 0 | 57  | 0 |
| 0 | 0 | 0 | 0  | 0 | 10  | 0 |
| 0 | 0 | 0 | 0  | 0 | 169 | 0 |
| 0 | 0 | 0 | 0  | 0 | 15  | 0 |
| 0 | 0 | 0 | 0  | 0 | 11  | 0 |
| 0 | 0 | 0 | 0  | 0 | 16  | 0 |

[illegible]

[illegible]

[illegible]



[illegible]

[illegible]

[illegible]

[illegible]

|   |   |   |   |     |   |   |
|---|---|---|---|-----|---|---|
| 0 | 0 | 0 | 0 | 0   | 0 | 0 |
| 0 | 0 | 0 | 0 | 0   | 0 | 0 |
| 0 | 0 | 0 | 0 | 0   | 0 | 0 |
| 0 | 0 | 0 | 0 | 0   | 0 | 0 |
| 0 | 0 | 0 | 0 | 0   | 0 | 0 |
| 0 | 0 | 0 | 0 | 0   | 0 | 0 |
| 0 | 0 | 0 | 0 | 0   | 0 | 0 |
| 0 | 0 | 0 | 0 | 0   | 0 | 0 |
| 0 | 0 | 0 | 0 | 10  | 0 | 0 |
| 0 | 0 | 0 | 0 | 20  | 0 | 0 |
| 0 | 0 | 0 | 0 | 21  | 0 | 0 |
| 0 | 0 | 0 | 0 | 17  | 0 | 0 |
| 0 | 0 | 0 | 0 | 431 | 0 | 0 |
| 0 | 0 | 0 | 0 | 119 | 0 | 0 |
| 0 | 0 | 0 | 0 | 25  | 0 | 0 |
| 0 | 0 | 0 | 0 | 293 | 0 | 0 |
| 0 | 0 | 0 | 0 | 26  | 0 | 0 |
| 0 | 0 | 0 | 0 | 11  | 0 | 0 |
| 0 | 0 | 0 | 0 | 11  | 0 | 0 |
| 0 | 0 | 0 | 0 | 11  | 0 | 0 |
| 0 | 0 | 0 | 0 | 0   | 0 | 0 |
| 0 | 0 | 0 | 0 | 0   | 0 | 0 |
| 0 | 0 | 0 | 0 | 0   | 0 | 0 |

| Umbilical Cord |        |        |        |        |        |        |
|----------------|--------|--------|--------|--------|--------|--------|
| UC_283         | UC_288 | UC_302 | UC_307 | UC_324 | UC_329 | UC_332 |
| 0              | 25     | 10     | 0      | 0      | 14     | 0      |
| 120            | 0      | 0      | 0      | 0      | 0      | 0      |
| 324            | 168    | 0      | 108    | 0      | 83     | 0      |
| 289            | 191    | 20     | 58     | 0      | 81     | 0      |
| 64             | 145    | 0      | 32     | 0      | 26     | 0      |
| 11             | 317    | 20     | 0      | 0      | 0      | 0      |
| 42             | 103    | 0      | 11     | 0      | 0      | 0      |
| 148            | 0      | 0      | 0      | 0      | 27     | 0      |
| 116            | 12     | 34     | 64     | 0      | 0      | 0      |
| 202            | 84     | 22     | 413    | 0      | 177    | 34     |
| 211            | 0      | 0      | 68     | 0      | 21     | 22     |
| 53             | 0      | 0      | 0      | 0      | 0      | 0      |
| 50             | 0      | 0      | 38     | 0      | 12     | 0      |
| 41             | 0      | 0      | 11     | 0      | 39     | 36     |
| 81             | 0      | 0      | 80     | 0      | 33     | 53     |
| 24             | 0      | 0      | 84     | 0      | 0      | 0      |
| 313            | 156    | 546    | 1474   | 885    | 1372   | 1069   |
| 0              | 0      | 0      | 481    | 39     | 204    | 90     |
| 33             | 0      | 40     | 16     | 14     | 11     | 14     |
| 10             | 48     | 0      | 131    | 15     | 206    | 36     |
| 0              | 0      | 0      | 16     | 12     | 87     | 60     |
| 12             | 0      | 54     | 125    | 13     | 85     | 0      |
| 41             | 81     | 0      | 69     | 0      | 37     | 0      |
| 0              | 0      | 0      | 0      | 0      | 0      | 0      |
| 463            | 482    | 371    | 1903   | 2741   | 3072   | 1008   |
| 54             | 72     | 253    | 1061   | 1019   | 993    | 312    |
| 41             | 10     | 38     | 601    | 840    | 776    | 126    |
| 48             | 18     | 41     | 166    | 292    | 771    | 122    |
| 95             | 54     | 127    | 431    | 899    | 2125   | 533    |
| 29             | 0      | 12     | 50     | 0      | 78     | 0      |
| 17             | 46     | 18     | 215    | 42     | 60     | 10     |
| 0              | 0      | 0      | 85     | 234    | 70     | 39     |
| 564            | 139    | 1444   | 2942   | 6867   | 1229   | 949    |
| 10             | 15     | 0      | 0      | 0      | 0      | 0      |
| 0              | 0      | 0      | 0      | 0      | 167    | 45     |
| 0              | 0      | 0      | 11     | 0      | 83     | 69     |
| 13             | 0      | 0      | 0      | 0      | 58     | 62     |
| 139            | 137    | 136    | 768    | 306    | 325    | 170    |
| 14             | 22     | 0      | 2401   | 100    | 373    | 156    |
| 4876           | 442    | 1186   | 11201  | 5332   | 4964   | 2093   |
| 102            | 0      | 142    | 231    | 795    | 58     | 56     |

|      |      |     |      |     |      |      |
|------|------|-----|------|-----|------|------|
| 113  | 0    | 128 | 161  | 942 | 48   | 31   |
| 21   | 0    | 53  | 499  | 433 | 836  | 491  |
| 49   | 0    | 107 | 444  | 340 | 872  | 498  |
| 1631 | 280  | 203 | 9793 | 540 | 3685 | 1067 |
| 0    | 94   | 0   | 862  | 214 | 2268 | 1442 |
| 759  | 0    | 12  | 123  | 0   | 13   | 0    |
| 169  | 0    | 0   | 323  | 0   | 170  | 85   |
| 1754 | 0    | 0   | 209  | 0   | 23   | 0    |
| 98   | 34   | 0   | 160  | 0   | 30   | 0    |
| 631  | 0    | 0   | 22   | 0   | 12   | 0    |
| 0    | 0    | 0   | 0    | 0   | 0    | 0    |
| 153  | 0    | 0   | 211  | 0   | 44   | 0    |
| 502  | 46   | 0   | 635  | 0   | 103  | 13   |
| 302  | 0    | 0   | 34   | 0   | 0    | 0    |
| 268  | 0    | 0   | 30   | 0   | 0    | 0    |
| 1646 | 0    | 10  | 35   | 0   | 43   | 0    |
| 40   | 0    | 0   | 138  | 0   | 0    | 0    |
| 1362 | 233  | 447 | 1498 | 459 | 1232 | 572  |
| 174  | 14   | 0   | 910  | 89  | 355  | 155  |
| 97   | 0    | 41  | 28   | 50  | 22   | 0    |
| 129  | 0    | 0   | 214  | 10  | 58   | 28   |
| 0    | 0    | 0   | 0    | 0   | 0    | 0    |
| 59   | 0    | 0   | 0    | 0   | 0    | 0    |
| 0    | 53   | 0   | 78   | 14  | 0    | 0    |
| 30   | 0    | 0   | 18   | 0   | 13   | 0    |
| 76   | 26   | 0   | 160  | 0   | 15   | 0    |
| 104  | 0    | 0   | 107  | 0   | 12   | 0    |
| 31   | 0    | 0   | 0    | 0   | 0    | 0    |
| 45   | 0    | 0   | 0    | 0   | 0    | 0    |
| 0    | 23   | 0   | 44   | 0   | 10   | 0    |
| 2864 | 0    | 56  | 1380 | 28  | 235  | 29   |
| 3231 | 1106 | 395 | 3550 | 360 | 1094 | 447  |
| 0    | 63   | 0   | 35   | 0   | 27   | 0    |
| 180  | 0    | 0   | 161  | 0   | 25   | 0    |
| 420  | 0    | 0   | 23   | 0   | 0    | 0    |
| 443  | 0    | 0   | 141  | 0   | 53   | 0    |
| 177  | 0    | 0   | 339  | 0   | 75   | 0    |
| 284  | 0    | 52  | 254  | 0   | 92   | 21   |
| 33   | 0    | 10  | 43   | 0   | 0    | 0    |
| 129  | 0    | 10  | 120  | 0   | 0    | 0    |
| 1177 | 0    | 21  | 1219 | 10  | 163  | 32   |
| 59   | 179  | 26  | 50   | 0   | 0    | 0    |
| 71   | 0    | 0   | 54   | 0   | 55   | 0    |
| 57   | 0    | 0   | 41   | 0   | 24   | 0    |
| 1683 | 23   | 105 | 1016 | 0   | 139  | 0    |
| 5098 | 342  | 300 | 5210 | 121 | 997  | 203  |

|      |      |      |      |      |      |      |
|------|------|------|------|------|------|------|
| 156  | 0    | 10   | 248  | 0    | 132  | 156  |
| 80   | 698  | 74   | 608  | 39   | 189  | 225  |
| 194  | 0    | 0    | 924  | 0    | 0    | 0    |
| 255  | 0    | 0    | 193  | 0    | 18   | 0    |
| 3293 | 214  | 132  | 1795 | 57   | 548  | 54   |
| 0    | 281  | 14   | 0    | 0    | 12   | 0    |
| 60   | 0    | 0    | 0    | 0    | 0    | 0    |
| 161  | 13   | 10   | 0    | 0    | 0    | 0    |
| 63   | 0    | 0    | 0    | 0    | 0    | 0    |
| 0    | 13   | 48   | 10   | 0    | 13   | 12   |
| 10   | 169  | 24   | 90   | 28   | 99   | 50   |
| 70   | 12   | 53   | 76   | 0    | 13   | 35   |
| 1118 | 2564 | 1649 | 4846 | 984  | 2480 | 1463 |
| 0    | 0    | 0    | 0    | 12   | 0    | 0    |
| 651  | 627  | 230  | 600  | 194  | 245  | 109  |
| 134  | 0    | 0    | 303  | 0    | 48   | 0    |
| 0    | 0    | 0    | 48   | 21   | 56   | 24   |
| 712  | 0    | 30   | 107  | 0    | 65   | 0    |
| 0    | 13   | 0    | 10   | 0    | 0    | 0    |
| 136  | 0    | 0    | 144  | 0    | 26   | 0    |
| 25   | 0    | 0    | 0    | 0    | 0    | 0    |
| 0    | 0    | 0    | 38   | 0    | 0    | 0    |
| 0    | 25   | 0    | 42   | 0    | 37   | 0    |
| 48   | 11   | 127  | 117  | 73   | 75   | 62   |
| 99   | 23   | 302  | 490  | 82   | 155  | 327  |
| 48   | 41   | 214  | 232  | 68   | 118  | 102  |
| 25   | 12   | 56   | 100  | 35   | 122  | 55   |
| 0    | 0    | 0    | 93   | 24   | 120  | 51   |
| 383  | 0    | 0    | 152  | 36   | 185  | 88   |
| 808  | 324  | 321  | 829  | 136  | 983  | 376  |
| 0    | 11   | 0    | 22   | 0    | 93   | 0    |
| 0    | 0    | 22   | 0    | 0    | 0    | 0    |
| 0    | 0    | 0    | 48   | 11   | 155  | 0    |
| 0    | 77   | 0    | 89   | 45   | 107  | 74   |
| 86   | 0    | 0    | 10   | 0    | 0    | 0    |
| 10   | 0    | 0    | 0    | 0    | 0    | 0    |
| 35   | 0    | 39   | 39   | 0    | 27   | 56   |
| 74   | 43   | 132  | 62   | 53   | 63   | 59   |
| 135  | 0    | 0    | 74   | 0    | 24   | 0    |
| 107  | 150  | 551  | 475  | 154  | 254  | 194  |
| 0    | 0    | 37   | 38   | 11   | 13   | 0    |
| 0    | 34   | 20   | 22   | 0    | 0    | 11   |
| 453  | 0    | 21   | 263  | 21   | 101  | 22   |
| 930  | 1477 | 542  | 8533 | 2509 | 7389 | 6576 |
| 10   | 0    | 12   | 339  | 177  | 531  | 437  |
| 118  | 12   | 723  | 3443 | 2013 | 3997 | 4572 |



|      |      |     |      |     |     |     |
|------|------|-----|------|-----|-----|-----|
| 11   | 31   | 0   | 28   | 0   | 14  | 62  |
| 0    | 59   | 0   | 213  | 51  | 129 | 40  |
| 14   | 133  | 152 | 562  | 113 | 182 | 165 |
| 1747 | 248  | 477 | 5416 | 739 | 536 | 460 |
| 110  | 0    | 28  | 296  | 0   | 12  | 0   |
| 78   | 90   | 45  | 744  | 44  | 73  | 52  |
| 0    | 0    | 0   | 0    | 0   | 0   | 0   |
| 68   | 0    | 35  | 267  | 0   | 21  | 0   |
| 67   | 0    | 0   | 51   | 0   | 15  | 0   |
| 0    | 0    | 0   | 0    | 0   | 0   | 0   |
| 98   | 52   | 45  | 229  | 27  | 37  | 17  |
| 0    | 110  | 26  | 33   | 0   | 187 | 134 |
| 171  | 0    | 20  | 86   | 0   | 0   | 0   |
| 0    | 0    | 41  | 133  | 0   | 44  | 55  |
| 23   | 48   | 36  | 324  | 114 | 197 | 150 |
| 94   | 0    | 0   | 57   | 0   | 0   | 0   |
| 45   | 0    | 0   | 121  | 0   | 10  | 0   |
| 62   | 0    | 0   | 0    | 0   | 0   | 0   |
| 0    | 0    | 0   | 0    | 0   | 0   | 0   |
| 0    | 84   | 502 | 0    | 508 | 203 | 28  |
| 140  | 81   | 162 | 164  | 78  | 53  | 29  |
| 26   | 68   | 209 | 26   | 0   | 0   | 0   |
| 103  | 182  | 32  | 99   | 37  | 74  | 70  |
| 0    | 0    | 0   | 10   | 0   | 0   | 0   |
| 43   | 0    | 35  | 20   | 0   | 0   | 0   |
| 1815 | 124  | 23  | 149  | 13  | 139 | 11  |
| 41   | 344  | 40  | 351  | 53  | 86  | 56  |
| 124  | 378  | 96  | 560  | 151 | 337 | 113 |
| 0    | 39   | 0   | 66   | 0   | 74  | 24  |
| 81   | 0    | 0   | 149  | 0   | 15  | 11  |
| 0    | 120  | 0   | 48   | 0   | 0   | 0   |
| 100  | 36   | 0   | 160  | 57  | 90  | 66  |
| 381  | 423  | 78  | 214  | 44  | 48  | 23  |
| 0    | 35   | 0   | 13   | 0   | 0   | 0   |
| 161  | 71   | 47  | 214  | 51  | 68  | 50  |
| 1805 | 0    | 52  | 209  | 185 | 555 | 43  |
| 1256 | 55   | 42  | 161  | 0   | 207 | 0   |
| 59   | 0    | 0   | 0    | 0   | 0   | 0   |
| 86   | 0    | 0   | 72   | 0   | 0   | 0   |
| 28   | 0    | 0   | 0    | 0   | 0   | 0   |
| 230  | 0    | 448 | 79   | 80  | 0   | 0   |
| 292  | 0    | 0   | 0    | 0   | 0   | 0   |
| 567  | 0    | 12  | 22   | 0   | 22  | 0   |
| 73   | 0    | 0   | 11   | 0   | 0   | 0   |
| 296  | 1360 | 976 | 0    | 0   | 46  | 0   |
| 0    | 709  | 130 | 59   | 11  | 21  | 13  |

|      |      |      |      |      |      |      |
|------|------|------|------|------|------|------|
| 20   | 43   | 315  | 39   | 0    | 11   | 0    |
| 42   | 534  | 920  | 118  | 27   | 73   | 183  |
| 27   | 2676 | 2358 | 1289 | 175  | 602  | 931  |
| 10   | 9046 | 3284 | 331  | 64   | 51   | 366  |
| 56   | 0    | 0    | 43   | 0    | 22   | 0    |
| 355  | 192  | 68   | 178  | 35   | 197  | 94   |
| 346  | 505  | 175  | 265  | 21   | 196  | 77   |
| 0    | 0    | 0    | 0    | 0    | 0    | 0    |
| 58   | 0    | 0    | 46   | 0    | 32   | 0    |
| 48   | 0    | 0    | 0    | 0    | 0    | 0    |
| 148  | 0    | 0    | 50   | 0    | 0    | 0    |
| 59   | 0    | 0    | 0    | 0    | 0    | 0    |
| 247  | 0    | 0    | 61   | 0    | 104  | 25   |
| 157  | 1240 | 271  | 1457 | 207  | 1131 | 413  |
| 12   | 129  | 12   | 11   | 0    | 119  | 30   |
| 1765 | 60   | 36   | 135  | 0    | 281  | 43   |
| 0    | 31   | 0    | 0    | 0    | 0    | 0    |
| 0    | 0    | 0    | 10   | 0    | 13   | 0    |
| 30   | 0    | 0    | 0    | 0    | 0    | 0    |
| 73   | 0    | 0    | 0    | 0    | 0    | 0    |
| 477  | 0    | 0    | 0    | 0    | 0    | 0    |
| 1274 | 148  | 971  | 854  | 7108 | 3546 | 995  |
| 586  | 0    | 0    | 32   | 0    | 12   | 0    |
| 0    | 0    | 0    | 0    | 0    | 0    | 0    |
| 637  | 0    | 0    | 13   | 0    | 58   | 0    |
| 100  | 12   | 0    | 85   | 0    | 93   | 27   |
| 1112 | 0    | 131  | 122  | 81   | 194  | 0    |
| 117  | 0    | 0    | 0    | 0    | 0    | 0    |
| 1403 | 0    | 12   | 0    | 0    | 0    | 0    |
| 0    | 0    | 0    | 0    | 0    | 0    | 0    |
| 285  | 0    | 26   | 0    | 0    | 0    | 0    |
| 3593 | 0    | 0    | 0    | 0    | 0    | 0    |
| 328  | 0    | 0    | 0    | 0    | 0    | 0    |
| 69   | 0    | 0    | 0    | 0    | 0    | 0    |
| 25   | 0    | 0    | 0    | 0    | 0    | 0    |
| 25   | 0    | 37   | 49   | 83   | 87   | 0    |
| 9123 | 610  | 2552 | 3891 | 1643 | 7812 | 1272 |
| 7187 | 191  | 3417 | 1378 | 1119 | 3427 | 962  |
| 848  | 0    | 64   | 194  | 0    | 161  | 40   |
| 116  | 0    | 0    | 0    | 0    | 0    | 0    |
| 34   | 0    | 0    | 0    | 0    | 0    | 0    |
| 6920 | 124  | 158  | 1241 | 99   | 460  | 57   |
| 1592 | 73   | 170  | 194  | 83   | 82   | 15   |
| 43   | 0    | 39   | 24   | 14   | 16   | 0    |
| 1563 | 0    | 0    | 34   | 0    | 51   | 0    |
| 4235 | 31   | 65   | 410  | 11   | 470  | 11   |

|      |     |      |      |      |      |      |
|------|-----|------|------|------|------|------|
| 1703 | 0   | 21   | 339  | 10   | 218  | 0    |
| 4635 | 11  | 28   | 834  | 15   | 223  | 0    |
| 518  | 0   | 191  | 156  | 34   | 461  | 87   |
| 15   | 11  | 16   | 0    | 0    | 39   | 10   |
| 89   | 36  | 113  | 58   | 24   | 57   | 34   |
| 3452 | 185 | 1586 | 1431 | 1402 | 3571 | 926  |
| 2294 | 58  | 110  | 296  | 46   | 230  | 30   |
| 23   | 0   | 233  | 123  | 17   | 72   | 47   |
| 0    | 0   | 0    | 66   | 22   | 0    | 10   |
| 0    | 0   | 0    | 0    | 0    | 0    | 0    |
| 981  | 0   | 0    | 34   | 0    | 50   | 0    |
| 0    | 0   | 0    | 26   | 0    | 0    | 0    |
| 77   | 0   | 0    | 19   | 0    | 0    | 0    |
| 244  | 12  | 333  | 379  | 98   | 717  | 355  |
| 0    | 0   | 0    | 151  | 31   | 11   | 42   |
| 432  | 0   | 0    | 0    | 0    | 0    | 0    |
| 401  | 0   | 0    | 0    | 0    | 0    | 0    |
| 927  | 0   | 0    | 39   | 0    | 44   | 0    |
| 217  | 59  | 229  | 760  | 344  | 1350 | 487  |
| 112  | 0   | 0    | 62   | 0    | 127  | 36   |
| 0    | 0   | 0    | 0    | 0    | 10   | 0    |
| 25   | 0   | 14   | 0    | 0    | 29   | 28   |
| 328  | 17  | 335  | 57   | 105  | 127  | 54   |
| 25   | 0   | 43   | 0    | 0    | 89   | 39   |
| 1550 | 161 | 1288 | 727  | 1390 | 5224 | 872  |
| 973  | 27  | 84   | 182  | 10   | 256  | 35   |
| 36   | 0   | 0    | 24   | 0    | 0    | 0    |
| 3476 | 51  | 219  | 1068 | 10   | 480  | 44   |
| 40   | 89  | 345  | 177  | 153  | 160  | 89   |
| 10   | 87  | 171  | 109  | 47   | 58   | 40   |
| 1329 | 0   | 10   | 226  | 0    | 178  | 0    |
| 27   | 52  | 42   | 38   | 13   | 41   | 13   |
| 132  | 0   | 0    | 0    | 0    | 0    | 0    |
| 158  | 0   | 77   | 12   | 57   | 10   | 0    |
| 1208 | 50  | 409  | 1064 | 436  | 3327 | 869  |
| 346  | 0   | 173  | 156  | 150  | 189  | 88   |
| 437  | 0   | 95   | 152  | 41   | 331  | 177  |
| 21   | 0   | 69   | 0    | 0    | 0    | 0    |
| 107  | 0   | 0    | 0    | 0    | 0    | 0    |
| 689  | 39  | 125  | 152  | 38   | 70   | 22   |
| 1466 | 74  | 30   | 25   | 0    | 92   | 0    |
| 487  | 220 | 37   | 144  | 0    | 44   | 0    |
| 33   | 0   | 0    | 33   | 0    | 0    | 17   |
| 81   | 186 | 93   | 154  | 149  | 377  | 70   |
| 0    | 0   | 11   | 11   | 0    | 0    | 0    |
| 2481 | 113 | 862  | 4940 | 106  | 382  | 1040 |

|      |     |      |       |       |      |      |
|------|-----|------|-------|-------|------|------|
| 580  | 273 | 1586 | 3546  | 453   | 1097 | 875  |
| 0    | 16  | 0    | 51    | 0     | 90   | 0    |
| 0    | 0   | 96   | 20    | 26    | 21   | 14   |
| 0    | 112 | 176  | 1649  | 793   | 1340 | 807  |
| 21   | 15  | 91   | 481   | 18    | 164  | 104  |
| 46   | 0   | 148  | 154   | 0     | 22   | 58   |
| 57   | 10  | 158  | 30    | 82    | 33   | 24   |
| 0    | 87  | 246  | 1374  | 79    | 114  | 387  |
| 0    | 0   | 22   | 58    | 0     | 0    | 0    |
| 0    | 0   | 12   | 13    | 0     | 0    | 0    |
| 61   | 0   | 0    | 0     | 0     | 0    | 0    |
| 0    | 10  | 258  | 389   | 89    | 398  | 296  |
| 1135 | 919 | 1868 | 6489  | 644   | 1734 | 1261 |
| 113  | 59  | 406  | 83    | 107   | 138  | 77   |
| 83   | 36  | 292  | 172   | 34    | 96   | 211  |
| 97   | 225 | 319  | 466   | 194   | 874  | 507  |
| 385  | 739 | 1050 | 1278  | 440   | 1215 | 1214 |
| 12   | 0   | 67   | 1516  | 0     | 225  | 117  |
| 0    | 0   | 24   | 487   | 0     | 102  | 57   |
| 41   | 13  | 86   | 1630  | 18    | 408  | 193  |
| 15   | 0   | 0    | 1747  | 0     | 147  | 41   |
| 33   | 0   | 15   | 274   | 307   | 236  | 56   |
| 69   | 29  | 0    | 1211  | 885   | 744  | 251  |
| 31   | 0   | 0    | 372   | 160   | 299  | 220  |
| 15   | 0   | 0    | 463   | 196   | 254  | 234  |
| 35   | 0   | 110  | 158   | 54    | 28   | 70   |
| 1268 | 518 | 3938 | 13645 | 11834 | 9155 | 6868 |
| 72   | 112 | 86   | 1305  | 1085  | 5648 | 1337 |
| 27   | 0   | 80   | 384   | 523   | 362  | 341  |
| 26   | 24  | 53   | 91    | 68    | 35   | 32   |
| 485  | 267 | 3321 | 4948  | 1775  | 924  | 1687 |
| 41   | 83  | 33   | 805   | 1322  | 2494 | 319  |
| 129  | 0   | 60   | 1910  | 3007  | 1540 | 1572 |
| 59   | 0   | 0    | 0     | 0     | 0    | 0    |
| 81   | 36  | 58   | 243   | 501   | 477  | 110  |
| 126  | 15  | 260  | 377   | 2483  | 688  | 375  |
| 0    | 0   | 44   | 58    | 190   | 112  | 12   |
| 119  | 103 | 456  | 1157  | 3370  | 1875 | 1390 |
| 135  | 85  | 192  | 702   | 1197  | 989  | 395  |
| 50   | 48  | 72   | 678   | 1311  | 743  | 235  |
| 11   | 104 | 56   | 487   | 321   | 655  | 174  |
| 10   | 22  | 106  | 1073  | 883   | 926  | 312  |
| 20   | 0   | 0    | 86    | 0     | 87   | 0    |
| 102  | 43  | 1021 | 266   | 373   | 501  | 579  |
| 216  | 201 | 92   | 234   | 53    | 174  | 45   |
| 74   | 0   | 51   | 60    | 14    | 53   | 0    |

|      |     |     |      |     |     |     |
|------|-----|-----|------|-----|-----|-----|
| 2498 | 121 | 704 | 199  | 160 | 311 | 57  |
| 52   | 228 | 49  | 243  | 72  | 232 | 57  |
| 45   | 73  | 135 | 84   | 90  | 77  | 0   |
| 33   | 369 | 19  | 149  | 66  | 396 | 56  |
| 0    | 26  | 0   | 10   | 11  | 0   | 0   |
| 182  | 0   | 0   | 0    | 0   | 0   | 0   |
| 18   | 15  | 36  | 79   | 0   | 176 | 34  |
| 14   | 74  | 0   | 41   | 26  | 64  | 0   |
| 0    | 11  | 0   | 10   | 109 | 103 | 0   |
| 20   | 16  | 0   | 135  | 49  | 102 | 50  |
| 72   | 0   | 0   | 0    | 10  | 0   | 0   |
| 408  | 547 | 222 | 382  | 686 | 416 | 64  |
| 0    | 37  | 0   | 0    | 0   | 149 | 0   |
| 0    | 40  | 0   | 82   | 17  | 165 | 22  |
| 105  | 0   | 0   | 0    | 0   | 0   | 0   |
| 100  | 0   | 0   | 0    | 0   | 0   | 0   |
| 0    | 35  | 0   | 0    | 0   | 26  | 0   |
| 471  | 36  | 0   | 0    | 0   | 36  | 0   |
| 1683 | 249 | 226 | 1427 | 386 | 511 | 228 |
| 528  | 0   | 0   | 0    | 0   | 0   | 0   |
| 37   | 0   | 0   | 0    | 0   | 0   | 0   |
| 420  | 0   | 0   | 0    | 0   | 0   | 0   |
| 0    | 0   | 0   | 0    | 0   | 0   | 0   |
| 2294 | 29  | 239 | 1200 | 366 | 397 | 130 |
| 0    | 0   | 0   | 0    | 0   | 0   | 0   |
| 110  | 0   | 0   | 27   | 0   | 18  | 0   |
| 187  | 0   | 45  | 394  | 77  | 67  | 0   |
| 73   | 10  | 34  | 393  | 90  | 43  | 15  |
| 84   | 0   | 0   | 0    | 0   | 0   | 0   |
| 92   | 0   | 0   | 0    | 0   | 0   | 0   |
| 55   | 0   | 0   | 0    | 0   | 0   | 0   |
| 52   | 0   | 0   | 0    | 0   | 0   | 0   |
| 36   | 0   | 0   | 0    | 0   | 0   | 0   |
| 91   | 0   | 0   | 0    | 0   | 12  | 0   |
| 537  | 0   | 52  | 744  | 116 | 582 | 123 |
| 106  | 0   | 0   | 0    | 0   | 0   | 0   |
| 0    | 0   | 0   | 0    | 0   | 0   | 0   |
| 0    | 0   | 0   | 0    | 0   | 0   | 0   |
| 36   | 0   | 0   | 0    | 0   | 0   | 0   |
| 15   | 12  | 0   | 0    | 0   | 0   | 0   |
| 0    | 0   | 0   | 10   | 0   | 0   | 0   |
| 10   | 0   | 0   | 10   | 10  | 0   | 0   |
| 15   | 28  | 16  | 39   | 16  | 20  | 11  |
| 32   | 0   | 0   | 40   | 0   | 40  | 23  |
| 30   | 0   | 0   | 0    | 0   | 0   | 0   |
| 0    | 0   | 0   | 0    | 0   | 0   | 0   |

|      |      |     |      |     |      |     |
|------|------|-----|------|-----|------|-----|
| 255  | 10   | 45  | 63   | 0   | 264  | 45  |
| 54   | 0    | 0   | 0    | 0   | 0    | 0   |
| 12   | 0    | 0   | 0    | 0   | 0    | 0   |
| 360  | 1271 | 492 | 1118 | 347 | 466  | 511 |
| 471  | 0    | 0   | 11   | 0   | 39   | 0   |
| 266  | 0    | 0   | 10   | 0   | 49   | 0   |
| 276  | 0    | 10  | 24   | 0   | 258  | 0   |
| 322  | 0    | 12  | 60   | 0   | 104  | 0   |
| 11   | 39   | 0   | 0    | 12  | 156  | 16  |
| 164  | 0    | 76  | 61   | 54  | 0    | 0   |
| 216  | 10   | 28  | 192  | 68  | 585  | 137 |
| 382  | 359  | 53  | 387  | 71  | 623  | 99  |
| 2362 | 11   | 75  | 184  | 0   | 1269 | 97  |
| 1074 | 279  | 133 | 292  | 81  | 644  | 107 |
| 367  | 0    | 35  | 72   | 0   | 231  | 61  |
| 13   | 0    | 0   | 0    | 0   | 0    | 0   |
| 29   | 0    | 0   | 0    | 0   | 0    | 0   |
| 346  | 0    | 0   | 0    | 0   | 90   | 0   |
| 0    | 0    | 0   | 0    | 0   | 0    | 0   |
| 62   | 0    | 10  | 0    | 0   | 0    | 0   |
| 216  | 10   | 41  | 50   | 26  | 51   | 23  |
| 34   | 0    | 0   | 0    | 0   | 0    | 0   |
| 378  | 0    | 28  | 60   | 11  | 99   | 0   |
| 2627 | 0    | 52  | 126  | 32  | 450  | 0   |
| 83   | 0    | 0   | 0    | 0   | 0    | 0   |
| 91   | 0    | 0   | 0    | 0   | 0    | 0   |
| 10   | 0    | 14  | 49   | 0   | 38   | 0   |
| 0    | 0    | 0   | 0    | 0   | 0    | 0   |
| 129  | 220  | 217 | 598  | 181 | 287  | 120 |
| 0    | 0    | 0   | 0    | 0   | 0    | 0   |
| 0    | 0    | 25  | 26   | 11  | 24   | 10  |
| 34   | 0    | 12  | 75   | 48  | 75   | 14  |
| 23   | 0    | 11  | 37   | 16  | 12   | 20  |
| 46   | 0    | 0   | 0    | 0   | 0    | 0   |
| 24   | 0    | 0   | 0    | 0   | 0    | 0   |
| 0    | 0    | 0   | 0    | 0   | 0    | 0   |
| 0    | 0    | 0   | 0    | 0   | 0    | 0   |
| 617  | 223  | 142 | 442  | 138 | 877  | 187 |
| 25   | 0    | 0   | 0    | 0   | 0    | 0   |
| 147  | 0    | 0   | 0    | 0   | 159  | 34  |
| 10   | 0    | 21  | 94   | 0   | 530  | 90  |
| 82   | 0    | 0   | 31   | 0   | 48   | 0   |
| 73   | 0    | 0   | 0    | 0   | 0    | 0   |
| 81   | 0    | 0   | 0    | 12  | 24   | 0   |
| 34   | 0    | 0   | 0    | 22  | 0    | 0   |
| 95   | 0    | 0   | 0    | 0   | 10   | 0   |

|       |     |      |      |     |      |     |
|-------|-----|------|------|-----|------|-----|
| 64    | 0   | 76   | 91   | 63  | 123  | 14  |
| 0     | 0   | 0    | 80   | 0   | 0    | 0   |
| 0     | 0   | 0    | 0    | 0   | 0    | 0   |
| 0     | 0   | 0    | 0    | 0   | 38   | 0   |
| 153   | 0   | 0    | 0    | 0   | 0    | 0   |
| 210   | 0   | 0    | 0    | 0   | 26   | 0   |
| 69    | 0   | 0    | 14   | 0   | 87   | 0   |
| 65    | 0   | 43   | 81   | 13  | 0    | 0   |
| 1601  | 906 | 870  | 1617 | 514 | 1522 | 529 |
| 10    | 112 | 31   | 66   | 49  | 132  | 54  |
| 79    | 0   | 38   | 96   | 27  | 11   | 0   |
| 225   | 329 | 357  | 512  | 222 | 522  | 102 |
| 31    | 0   | 0    | 0    | 0   | 0    | 0   |
| 15    | 0   | 0    | 0    | 0   | 0    | 0   |
| 0     | 0   | 14   | 14   | 13  | 0    | 0   |
| 368   | 173 | 1160 | 992  | 434 | 543  | 616 |
| 62    | 0   | 59   | 24   | 97  | 32   | 0   |
| 39    | 0   | 0    | 0    | 18  | 0    | 0   |
| 88    | 0   | 0    | 0    | 0   | 28   | 0   |
| 53    | 0   | 0    | 0    | 0   | 0    | 0   |
| 12    | 0   | 0    | 0    | 0   | 0    | 0   |
| 0     | 0   | 0    | 10   | 0   | 13   | 0   |
| 32    | 11  | 0    | 26   | 0   | 10   | 0   |
| 201   | 45  | 115  | 113  | 30  | 33   | 13  |
| 2839  | 56  | 157  | 839  | 205 | 2450 | 235 |
| 1359  | 254 | 705  | 1071 | 437 | 1625 | 477 |
| 96    | 63  | 30   | 141  | 24  | 225  | 35  |
| 185   | 0   | 96   | 61   | 75  | 66   | 0   |
| 304   | 28  | 139  | 428  | 249 | 526  | 248 |
| 0     | 0   | 0    | 32   | 0   | 0    | 0   |
| 10    | 0   | 0    | 0    | 0   | 0    | 0   |
| 16    | 0   | 0    | 0    | 0   | 0    | 0   |
| 29    | 0   | 93   | 49   | 46  | 91   | 43  |
| 0     | 13  | 41   | 71   | 11  | 40   | 0   |
| 85    | 87  | 137  | 178  | 99  | 107  | 34  |
| 0     | 24  | 0    | 26   | 0   | 122  | 0   |
| 2266  | 0   | 0    | 496  | 0   | 246  | 14  |
| 19538 | 821 | 794  | 9618 | 984 | 8499 | 996 |
| 476   | 28  | 10   | 377  | 233 | 2461 | 271 |
| 53    | 0   | 0    | 10   | 0   | 0    | 0   |
| 9943  | 15  | 60   | 909  | 0   | 483  | 53  |
| 20    | 0   | 0    | 78   | 0   | 0    | 18  |
| 61    | 24  | 0    | 22   | 0   | 12   | 0   |
| 763   | 0   | 14   | 61   | 0   | 56   | 0   |
| 12    | 0   | 10   | 0    | 0   | 0    | 0   |
| 1237  | 19  | 48   | 65   | 0   | 426  | 114 |

|      |      |      |      |      |      |      |
|------|------|------|------|------|------|------|
| 1439 | 0    | 0    | 24   | 0    | 24   | 0    |
| 542  | 0    | 0    | 76   | 0    | 31   | 0    |
| 17   | 0    | 0    | 0    | 0    | 0    | 0    |
| 5031 | 49   | 218  | 367  | 54   | 362  | 89   |
| 0    | 26   | 0    | 12   | 14   | 0    | 0    |
| 181  | 0    | 115  | 89   | 51   | 258  | 23   |
| 109  | 19   | 76   | 50   | 48   | 165  | 56   |
| 166  | 11   | 46   | 202  | 44   | 288  | 48   |
| 20   | 60   | 58   | 64   | 0    | 29   | 0    |
| 75   | 0    | 13   | 90   | 0    | 42   | 14   |
| 779  | 73   | 306  | 1437 | 376  | 1417 | 448  |
| 515  | 0    | 0    | 116  | 0    | 37   | 0    |
| 88   | 0    | 0    | 0    | 0    | 10   | 0    |
| 32   | 140  | 31   | 24   | 10   | 26   | 0    |
| 23   | 56   | 0    | 0    | 0    | 33   | 0    |
| 0    | 0    | 0    | 0    | 0    | 0    | 0    |
| 0    | 0    | 0    | 0    | 0    | 0    | 0    |
| 0    | 0    | 0    | 0    | 0    | 0    | 0    |
| 73   | 203  | 133  | 174  | 31   | 88   | 50   |
| 134  | 0    | 0    | 0    | 0    | 0    | 0    |
| 1145 | 13   | 94   | 0    | 31   | 140  | 23   |
| 0    | 0    | 0    | 0    | 0    | 0    | 0    |
| 2151 | 0    | 16   | 57   | 0    | 103  | 0    |
| 3410 | 0    | 0    | 23   | 0    | 27   | 0    |
| 3053 | 0    | 35   | 367  | 0    | 257  | 0    |
| 770  | 0    | 27   | 0    | 0    | 0    | 0    |
| 33   | 0    | 0    | 0    | 0    | 11   | 0    |
| 1245 | 13   | 64   | 0    | 0    | 25   | 0    |
| 548  | 0    | 0    | 17   | 0    | 44   | 11   |
| 417  | 0    | 0    | 0    | 0    | 0    | 0    |
| 968  | 0    | 0    | 11   | 0    | 0    | 0    |
| 160  | 0    | 0    | 0    | 0    | 0    | 0    |
| 443  | 0    | 0    | 0    | 0    | 0    | 0    |
| 0    | 0    | 26   | 13   | 10   | 15   | 0    |
| 0    | 0    | 0    | 0    | 0    | 0    | 0    |
| 342  | 0    | 0    | 0    | 0    | 0    | 0    |
| 708  | 47   | 0    | 55   | 0    | 42   | 0    |
| 993  | 0    | 183  | 305  | 74   | 520  | 139  |
| 6418 | 5456 | 2475 | 3841 | 1497 | 2971 | 1510 |
| 1699 | 0    | 23   | 0    | 0    | 0    | 0    |
| 14   | 0    | 0    | 0    | 0    | 0    | 0    |
| 322  | 0    | 0    | 0    | 0    | 0    | 0    |
| 537  | 0    | 44   | 191  | 78   | 465  | 129  |
| 75   | 0    | 0    | 34   | 16   | 67   | 33   |
| 175  | 0    | 0    | 0    | 0    | 0    | 0    |
| 17   | 0    | 0    | 0    | 0    | 0    | 0    |



|      |     |      |      |      |      |      |
|------|-----|------|------|------|------|------|
| 106  | 0   | 0    | 0    | 0    | 0    | 0    |
| 379  | 10  | 88   | 118  | 61   | 85   | 12   |
| 217  | 0   | 0    | 0    | 0    | 33   | 26   |
| 54   | 0   | 0    | 0    | 0    | 0    | 0    |
| 37   | 0   | 0    | 0    | 0    | 0    | 0    |
| 108  | 18  | 0    | 35   | 12   | 10   | 0    |
| 61   | 0   | 0    | 0    | 0    | 22   | 0    |
| 0    | 0   | 0    | 0    | 0    | 28   | 0    |
| 0    | 0   | 0    | 0    | 0    | 0    | 0    |
| 53   | 0   | 0    | 40   | 0    | 45   | 0    |
| 71   | 0   | 0    | 0    | 0    | 0    | 0    |
| 985  | 0   | 24   | 78   | 30   | 69   | 0    |
| 2063 | 508 | 5109 | 3471 | 1779 | 1820 | 1406 |
| 211  | 50  | 547  | 458  | 164  | 207  | 134  |
| 1953 | 0   | 0    | 83   | 0    | 40   | 0    |
| 104  | 0   | 0    | 0    | 0    | 0    | 0    |
| 128  | 0   | 0    | 0    | 0    | 0    | 0    |
| 25   | 13  | 41   | 36   | 0    | 0    | 10   |
| 25   | 0   | 75   | 28   | 97   | 64   | 25   |
| 353  | 102 | 954  | 877  | 381  | 474  | 282  |
| 265  | 43  | 471  | 444  | 149  | 211  | 135  |
| 48   | 52  | 40   | 99   | 0    | 95   | 24   |
| 321  | 36  | 0    | 331  | 33   | 285  | 95   |
| 129  | 0   | 0    | 0    | 0    | 0    | 0    |
| 0    | 0   | 36   | 0    | 0    | 0    | 0    |
| 43   | 0   | 0    | 0    | 0    | 0    | 0    |
| 387  | 0   | 0    | 0    | 0    | 12   | 0    |
| 234  | 259 | 348  | 390  | 92   | 212  | 66   |
| 170  | 0   | 11   | 112  | 0    | 158  | 11   |
| 285  | 0   | 12   | 21   | 0    | 0    | 0    |
| 329  | 0   | 0    | 0    | 0    | 12   | 0    |
| 0    | 0   | 0    | 0    | 0    | 0    | 0    |
| 175  | 203 | 177  | 458  | 181  | 2285 | 114  |
| 0    | 35  | 0    | 0    | 10   | 0    | 0    |
| 0    | 25  | 0    | 12   | 21   | 11   | 0    |
| 17   | 0   | 0    | 0    | 0    | 24   | 0    |
| 18   | 30  | 110  | 177  | 117  | 1446 | 36   |
| 10   | 0   | 69   | 67   | 44   | 323  | 0    |
| 117  | 56  | 119  | 175  | 38   | 1330 | 289  |
| 88   | 71  | 215  | 357  | 225  | 2763 | 98   |
| 16   | 10  | 21   | 0    | 0    | 23   | 0    |
| 38   | 0   | 0    | 0    | 0    | 0    | 0    |
| 82   | 0   | 0    | 0    | 0    | 43   | 0    |
| 2728 | 94  | 1094 | 1158 | 527  | 1824 | 535  |
| 10   | 0   | 0    | 0    | 0    | 0    | 0    |
| 97   | 0   | 0    | 0    | 0    | 10   | 0    |

|      |     |      |     |      |      |     |
|------|-----|------|-----|------|------|-----|
| 0    | 0   | 0    | 0   | 0    | 0    | 0   |
| 174  | 0   | 0    | 0   | 0    | 0    | 0   |
| 36   | 0   | 0    | 0   | 0    | 0    | 0   |
| 45   | 42  | 81   | 0   | 0    | 10   | 0   |
| 208  | 239 | 194  | 164 | 103  | 251  | 114 |
| 577  | 25  | 487  | 613 | 368  | 928  | 378 |
| 326  | 85  | 347  | 140 | 114  | 132  | 74  |
| 399  | 0   | 15   | 10  | 11   | 76   | 0   |
| 117  | 37  | 104  | 423 | 238  | 655  | 215 |
| 83   | 0   | 0    | 0   | 0    | 0    | 0   |
| 126  | 0   | 14   | 0   | 0    | 0    | 0   |
| 258  | 0   | 14   | 58  | 11   | 105  | 0   |
| 106  | 0   | 0    | 0   | 0    | 32   | 0   |
| 0    | 0   | 0    | 0   | 0    | 0    | 0   |
| 39   | 0   | 0    | 0   | 0    | 0    | 0   |
| 16   | 0   | 0    | 0   | 0    | 0    | 0   |
| 0    | 0   | 0    | 0   | 0    | 0    | 0   |
| 235  | 0   | 21   | 39  | 0    | 49   | 0   |
| 74   | 0   | 0    | 0   | 0    | 35   | 0   |
| 0    | 0   | 0    | 0   | 21   | 16   | 0   |
| 322  | 0   | 175  | 62  | 0    | 11   | 81  |
| 227  | 0   | 0    | 0   | 0    | 0    | 0   |
| 747  | 158 | 1536 | 700 | 465  | 610  | 653 |
| 0    | 0   | 0    | 0   | 0    | 0    | 11  |
| 424  | 445 | 617  | 715 | 264  | 383  | 230 |
| 145  | 0   | 0    | 0   | 0    | 0    | 0   |
| 199  | 0   | 125  | 130 | 50   | 73   | 129 |
| 14   | 243 | 158  | 257 | 52   | 162  | 61  |
| 63   | 0   | 0    | 0   | 0    | 0    | 0   |
| 24   | 0   | 0    | 0   | 0    | 0    | 0   |
| 11   | 0   | 0    | 0   | 0    | 0    | 0   |
| 1081 | 516 | 48   | 76  | 337  | 614  | 102 |
| 623  | 140 | 71   | 0   | 241  | 364  | 67  |
| 55   | 0   | 0    | 0   | 0    | 22   | 0   |
| 813  | 12  | 0    | 35  | 0    | 127  | 0   |
| 310  | 0   | 10   | 0   | 0    | 0    | 0   |
| 237  | 11  | 16   | 21  | 0    | 122  | 0   |
| 142  | 0   | 0    | 0   | 0    | 0    | 0   |
| 255  | 0   | 0    | 0   | 0    | 0    | 0   |
| 193  | 0   | 37   | 0   | 0    | 104  | 0   |
| 0    | 0   | 168  | 12  | 0    | 35   | 0   |
| 151  | 175 | 26   | 187 | 1959 | 1184 | 412 |
| 1104 | 202 | 35   | 240 | 38   | 1335 | 187 |
| 390  | 52  | 40   | 14  | 0    | 0    | 450 |
| 11   | 76  | 18   | 0   | 0    | 494  | 15  |
| 200  | 0   | 0    | 0   | 0    | 30   | 0   |

|       |      |       |       |       |       |       |
|-------|------|-------|-------|-------|-------|-------|
| 0     | 0    | 0     | 27    | 17    | 23    | 0     |
| 126   | 273  | 301   | 321   | 97    | 953   | 224   |
| 0     | 21   | 115   | 0     | 0     | 275   | 10    |
| 307   | 10   | 13    | 87    | 0     | 158   | 0     |
| 134   | 0    | 103   | 0     | 12    | 82    | 25    |
| 0     | 55   | 22    | 0     | 0     | 58    | 0     |
| 53    | 0    | 0     | 49    | 0     | 141   | 0     |
| 49    | 55   | 0     | 94    | 0     | 44    | 0     |
| 1178  | 595  | 1954  | 1690  | 1121  | 5839  | 1254  |
| 720   | 104  | 928   | 768   | 285   | 940   | 1178  |
| 222   | 26   | 568   | 268   | 81    | 306   | 344   |
| 23    | 10   | 13    | 44    | 11    | 95    | 0     |
| 0     | 0    | 0     | 0     | 0     | 0     | 0     |
| 18    | 0    | 0     | 0     | 0     | 282   | 0     |
| 48    | 0    | 0     | 0     | 0     | 0     | 0     |
| 81    | 139  | 19    | 110   | 40    | 849   | 234   |
| 0     | 10   | 0     | 14    | 0     | 14    | 12    |
| 57    | 0    | 0     | 11    | 0     | 0     | 0     |
| 0     | 0    | 0     | 0     | 0     | 82    | 0     |
| 0     | 0    | 0     | 0     | 0     | 0     | 0     |
| 518   | 32   | 92    | 259   | 18    | 556   | 71    |
| 190   | 78   | 133   | 255   | 29    | 1893  | 86    |
| 0     | 0    | 0     | 145   | 0     | 0     | 0     |
| 89    | 0    | 0     | 0     | 0     | 0     | 0     |
| 0     | 0    | 0     | 0     | 0     | 0     | 0     |
| 1294  | 88   | 248   | 195   | 105   | 140   | 71    |
| 11331 | 1630 | 3945  | 3588  | 2231  | 2894  | 2089  |
| 426   | 473  | 1723  | 2237  | 1865  | 5252  | 2011  |
| 9200  | 3820 | 11051 | 27022 | 14164 | 50809 | 21998 |
| 53    | 0    | 400   | 77    | 341   | 852   | 70    |
| 109   | 0    | 464   | 157   | 586   | 822   | 147   |
| 63    | 25   | 203   | 55    | 0     | 85    | 15    |
| 1459  | 550  | 2822  | 6147  | 2155  | 5491  | 1865  |
| 398   | 456  | 1283  | 1414  | 2670  | 2230  | 972   |
| 132   | 0    | 434   | 23    | 123   | 80    | 21    |
| 181   | 0    | 0     | 633   | 0     | 199   | 0     |
| 1564  | 361  | 385   | 1425  | 642   | 5508  | 1664  |
| 991   | 542  | 437   | 1642  | 195   | 3107  | 592   |
| 843   | 125  | 338   | 1429  | 360   | 2295  | 697   |
| 10866 | 180  | 383   | 1846  | 103   | 1729  | 278   |
| 237   | 28   | 0     | 29    | 0     | 12    | 0     |
| 190   | 0    | 0     | 45    | 0     | 15    | 0     |
| 3300  | 418  | 552   | 1643  | 702   | 6940  | 2547  |
| 110   | 0    | 52    | 59    | 0     | 735   | 103   |
| 328   | 0    | 0     | 0     | 0     | 0     | 0     |
| 1462  | 564  | 455   | 693   | 285   | 2371  | 745   |

|       |     |      |      |      |      |      |
|-------|-----|------|------|------|------|------|
| 305   | 119 | 102  | 349  | 120  | 1911 | 299  |
| 1769  | 946 | 1682 | 2742 | 1870 | 6195 | 3590 |
| 26    | 28  | 11   | 0    | 16   | 11   | 11   |
| 294   | 134 | 526  | 508  | 243  | 284  | 196  |
| 31    | 73  | 48   | 90   | 76   | 1076 | 283  |
| 0     | 0   | 10   | 0    | 0    | 33   | 38   |
| 218   | 269 | 444  | 300  | 438  | 5954 | 442  |
| 37    | 0   | 26   | 32   | 58   | 123  | 129  |
| 49    | 0   | 0    | 0    | 0    | 0    | 0    |
| 38    | 15  | 0    | 26   | 67   | 193  | 34   |
| 23    | 65  | 43   | 148  | 621  | 1618 | 257  |
| 106   | 48  | 62   | 53   | 12   | 475  | 106  |
| 37    | 0   | 0    | 0    | 0    | 0    | 0    |
| 90    | 0   | 0    | 0    | 0    | 0    | 0    |
| 1134  | 40  | 73   | 103  | 10   | 902  | 0    |
| 2790  | 102 | 455  | 616  | 382  | 2272 | 399  |
| 496   | 88  | 0    | 229  | 138  | 1702 | 343  |
| 943   | 12  | 70   | 167  | 55   | 694  | 11   |
| 317   | 0   | 10   | 191  | 0    | 126  | 28   |
| 36    | 0   | 0    | 14   | 0    | 363  | 116  |
| 579   | 32  | 60   | 150  | 180  | 1343 | 417  |
| 241   | 0   | 0    | 0    | 0    | 0    | 0    |
| 54    | 0   | 0    | 0    | 0    | 0    | 0    |
| 779   | 14  | 0    | 12   | 0    | 0    | 0    |
| 910   | 50  | 320  | 111  | 57   | 474  | 63   |
| 181   | 0   | 0    | 0    | 0    | 0    | 0    |
| 0     | 0   | 0    | 0    | 0    | 0    | 0    |
| 159   | 0   | 0    | 0    | 0    | 0    | 0    |
| 164   | 0   | 0    | 11   | 0    | 11   | 0    |
| 199   | 19  | 0    | 136  | 0    | 69   | 0    |
| 284   | 0   | 16   | 0    | 0    | 17   | 0    |
| 52    | 0   | 0    | 12   | 0    | 0    | 0    |
| 315   | 36  | 161  | 105  | 142  | 228  | 0    |
| 1108  | 207 | 556  | 282  | 147  | 189  | 99   |
| 40    | 12  | 40   | 40   | 16   | 539  | 0    |
| 0     | 42  | 34   | 42   | 0    | 47   | 20   |
| 117   | 0   | 136  | 665  | 127  | 1198 | 224  |
| 0     | 0   | 0    | 229  | 46   | 195  | 89   |
| 996   | 161 | 285  | 764  | 287  | 963  | 246  |
| 128   | 0   | 12   | 14   | 0    | 13   | 0    |
| 235   | 29  | 10   | 22   | 0    | 18   | 0    |
| 5682  | 43  | 51   | 36   | 0    | 61   | 0    |
| 400   | 0   | 0    | 0    | 0    | 0    | 0    |
| 8437  | 14  | 101  | 51   | 0    | 75   | 0    |
| 86    | 0   | 0    | 0    | 0    | 0    | 0    |
| 11807 | 0   | 81   | 12   | 0    | 79   | 0    |

|      |    |     |     |      |      |     |
|------|----|-----|-----|------|------|-----|
| 135  | 0  | 0   | 0   | 0    | 0    | 0   |
| 312  | 0  | 0   | 10  | 13   | 307  | 13  |
| 878  | 36 | 13  | 0   | 0    | 32   | 0   |
| 168  | 0  | 0   | 0   | 0    | 10   | 0   |
| 10   | 54 | 0   | 10  | 0    | 70   | 0   |
| 104  | 0  | 0   | 0   | 0    | 0    | 0   |
| 15   | 0  | 0   | 0   | 0    | 0    | 0   |
| 0    | 0  | 0   | 0   | 0    | 0    | 0   |
| 0    | 0  | 0   | 0   | 0    | 0    | 0   |
| 3436 | 25 | 21  | 10  | 0    | 205  | 0   |
| 0    | 12 | 0   | 0   | 0    | 0    | 0   |
| 0    | 48 | 29  | 82  | 0    | 0    | 10  |
| 0    | 0  | 55  | 552 | 195  | 104  | 57  |
| 0    | 0  | 10  | 70  | 0    | 128  | 113 |
| 0    | 0  | 118 | 413 | 115  | 1084 | 938 |
| 0    | 18 | 22  | 221 | 158  | 21   | 0   |
| 0    | 0  | 27  | 21  | 0    | 84   | 41  |
| 0    | 0  | 64  | 430 | 265  | 57   | 23  |
| 11   | 0  | 27  | 0   | 11   | 67   | 77  |
| 0    | 0  | 10  | 0   | 20   | 13   | 18  |
| 221  | 10 | 158 | 211 | 2416 | 760  | 66  |
| 10   | 0  | 0   | 120 | 146  | 148  | 10  |
| 0    | 0  | 0   | 12  | 0    | 53   | 0   |
| 0    | 0  | 0   | 0   | 0    | 0    | 0   |
| 24   | 0  | 30  | 84  | 11   | 125  | 10  |
| 0    | 0  | 10  | 18  | 0    | 0    | 0   |
| 0    | 0  | 0   | 0   | 0    | 0    | 0   |
| 0    | 15 | 291 | 266 | 10   | 0    | 11  |
| 0    | 0  | 0   | 80  | 427  | 0    | 0   |
| 0    | 0  | 0   | 15  | 0    | 0    | 0   |
| 0    | 0  | 0   | 0   | 0    | 0    | 12  |
| 0    | 0  | 0   | 0   | 0    | 0    | 0   |
| 0    | 0  | 0   | 17  | 10   | 12   | 0   |
| 0    | 0  | 0   | 0   | 0    | 34   | 32  |
| 0    | 36 | 0   | 72  | 0    | 0    | 0   |
| 0    | 0  | 0   | 0   | 0    | 0    | 0   |
| 0    | 0  | 0   | 0   | 0    | 0    | 0   |
| 0    | 0  | 0   | 0   | 0    | 0    | 0   |
| 0    | 0  | 0   | 0   | 0    | 26   | 11  |
| 0    | 0  | 12  | 27  | 13   | 11   | 0   |
| 0    | 0  | 0   | 0   | 0    | 35   | 0   |
| 0    | 0  | 31  | 12  | 0    | 20   | 0   |
| 0    | 0  | 0   | 0   | 0    | 0    | 0   |
| 51   | 0  | 25  | 25  | 0    | 34   | 32  |
| 0    | 22 | 75  | 90  | 0    | 19   | 24  |
| 0    | 10 | 0   | 0   | 0    | 0    | 0   |

|    |     |     |     |     |      |     |
|----|-----|-----|-----|-----|------|-----|
| 0  | 0   | 29  | 0   | 0   | 0    | 0   |
| 14 | 0   | 0   | 0   | 0   | 0    | 0   |
| 0  | 0   | 0   | 0   | 0   | 0    | 0   |
| 10 | 0   | 0   | 57  | 10  | 185  | 0   |
| 10 | 0   | 0   | 12  | 0   | 0    | 0   |
| 0  | 0   | 0   | 0   | 0   | 0    | 0   |
| 0  | 23  | 0   | 75  | 0   | 0    | 17  |
| 0  | 0   | 11  | 28  | 0   | 0    | 0   |
| 0  | 0   | 0   | 0   | 0   | 0    | 0   |
| 0  | 0   | 13  | 77  | 64  | 89   | 96  |
| 0  | 0   | 0   | 13  | 0   | 34   | 13  |
| 0  | 0   | 0   | 0   | 0   | 0    | 0   |
| 0  | 0   | 0   | 92  | 10  | 178  | 50  |
| 0  | 0   | 0   | 0   | 0   | 0    | 0   |
| 0  | 0   | 0   | 10  | 10  | 0    | 0   |
| 0  | 0   | 0   | 0   | 0   | 0    | 0   |
| 0  | 30  | 0   | 50  | 0   | 0    | 10  |
| 0  | 0   | 0   | 0   | 0   | 0    | 0   |
| 0  | 0   | 46  | 634 | 304 | 863  | 813 |
| 16 | 0   | 61  | 21  | 0   | 25   | 25  |
| 0  | 0   | 0   | 113 | 0   | 16   | 0   |
| 30 | 0   | 0   | 17  | 0   | 0    | 0   |
| 0  | 0   | 26  | 0   | 0   | 0    | 0   |
| 0  | 0   | 0   | 66  | 0   | 63   | 0   |
| 0  | 0   | 0   | 0   | 0   | 0    | 0   |
| 0  | 0   | 0   | 29  | 0   | 0    | 0   |
| 0  | 0   | 23  | 48  | 47  | 67   | 10  |
| 0  | 0   | 0   | 10  | 21  | 28   | 0   |
| 0  | 0   | 0   | 0   | 0   | 0    | 0   |
| 0  | 0   | 0   | 0   | 0   | 0    | 0   |
| 44 | 0   | 14  | 24  | 0   | 0    | 0   |
| 0  | 0   | 0   | 0   | 0   | 0    | 0   |
| 0  | 18  | 0   | 12  | 0   | 0    | 0   |
| 51 | 99  | 26  | 45  | 0   | 23   | 0   |
| 0  | 0   | 38  | 0   | 0   | 0    | 0   |
| 0  | 69  | 69  | 43  | 0   | 0    | 0   |
| 0  | 0   | 0   | 0   | 0   | 0    | 0   |
| 0  | 383 | 249 | 0   | 0   | 0    | 0   |
| 0  | 0   | 0   | 10  | 0   | 0    | 0   |
| 0  | 0   | 0   | 33  | 0   | 0    | 0   |
| 0  | 419 | 10  | 85  | 0   | 1728 | 253 |
| 0  | 203 | 0   | 0   | 0   | 51   | 33  |
| 0  | 28  | 60  | 35  | 0   | 585  | 110 |
| 0  | 0   | 0   | 0   | 14  | 56   | 0   |
| 0  | 0   | 35  | 91  | 0   | 11   | 0   |
| 0  | 0   | 0   | 0   | 0   | 0    | 0   |

|     |     |     |     |     |      |     |
|-----|-----|-----|-----|-----|------|-----|
| 0   | 10  | 41  | 75  | 15  | 0    | 0   |
| 0   | 50  | 0   | 0   | 0   | 0    | 0   |
| 0   | 0   | 80  | 498 | 0   | 0    | 0   |
| 0   | 76  | 20  | 0   | 0   | 0    | 0   |
| 0   | 92  | 164 | 750 | 24  | 56   | 95  |
| 10  | 233 | 525 | 516 | 119 | 731  | 892 |
| 11  | 0   | 0   | 0   | 0   | 0    | 0   |
| 0   | 0   | 32  | 148 | 95  | 1123 | 209 |
| 0   | 0   | 27  | 56  | 0   | 0    | 0   |
| 0   | 14  | 0   | 38  | 70  | 0    | 0   |
| 0   | 0   | 0   | 0   | 0   | 0    | 0   |
| 0   | 0   | 0   | 0   | 0   | 0    | 0   |
| 263 | 0   | 454 | 611 | 411 | 500  | 166 |
| 0   | 0   | 0   | 0   | 0   | 0    | 0   |
| 0   | 0   | 0   | 0   | 0   | 0    | 0   |
| 84  | 0   | 79  | 0   | 157 | 117  | 43  |
| 0   | 0   | 0   | 0   | 0   | 0    | 0   |
| 0   | 21  | 0   | 37  | 0   | 0    | 0   |
| 444 | 25  | 469 | 62  | 575 | 969  | 69  |
| 0   | 0   | 0   | 0   | 0   | 0    | 0   |
| 0   | 0   | 0   | 0   | 0   | 0    | 0   |
| 0   | 0   | 0   | 0   | 0   | 0    | 0   |
| 0   | 0   | 0   | 0   | 0   | 0    | 0   |
| 0   | 0   | 216 | 38  | 42  | 36   | 0   |
| 0   | 0   | 56  | 48  | 11  | 0    | 0   |
| 35  | 0   | 168 | 60  | 154 | 420  | 122 |
| 0   | 0   | 0   | 0   | 0   | 0    | 0   |
| 0   | 0   | 58  | 0   | 0   | 0    | 0   |
| 79  | 0   | 180 | 74  | 73  | 142  | 59  |
| 0   | 0   | 0   | 0   | 0   | 0    | 0   |
| 0   | 0   | 46  | 0   | 0   | 0    | 0   |
| 570 | 0   | 121 | 11  | 0   | 0    | 0   |
| 0   | 0   | 0   | 0   | 0   | 0    | 0   |
| 41  | 0   | 303 | 154 | 394 | 1453 | 370 |
| 35  | 0   | 0   | 0   | 0   | 192  | 51  |
| 0   | 0   | 0   | 0   | 0   | 0    | 0   |
| 0   | 0   | 0   | 0   | 0   | 0    | 0   |
| 0   | 0   | 0   | 0   | 0   | 13   | 0   |
| 0   | 0   | 15  | 0   | 0   | 13   | 0   |
| 13  | 34  | 83  | 49  | 28  | 33   | 0   |
| 80  | 0   | 63  | 27  | 40  | 0    | 0   |
| 0   | 0   | 0   | 134 | 78  | 1269 | 192 |
| 25  | 24  | 153 | 133 | 41  | 48   | 0   |
| 10  | 0   | 31  | 0   | 0   | 0    | 0   |
| 0   | 0   | 0   | 0   | 0   | 0    | 0   |
| 13  | 0   | 10  | 63  | 64  | 272  | 0   |

|     |     |     |      |     |     |     |
|-----|-----|-----|------|-----|-----|-----|
| 0   | 10  | 11  | 80   | 0   | 274 | 11  |
| 0   | 0   | 0   | 0    | 0   | 0   | 0   |
| 0   | 0   | 0   | 0    | 0   | 0   | 0   |
| 0   | 0   | 27  | 10   | 0   | 0   | 24  |
| 0   | 103 | 79  | 224  | 0   | 33  | 82  |
| 127 | 0   | 34  | 0    | 0   | 0   | 0   |
| 0   | 0   | 64  | 304  | 0   | 0   | 70  |
| 22  | 0   | 81  | 29   | 0   | 29  | 0   |
| 0   | 0   | 0   | 0    | 0   | 0   | 0   |
| 0   | 0   | 0   | 0    | 0   | 0   | 0   |
| 11  | 30  | 296 | 408  | 27  | 10  | 127 |
| 0   | 0   | 43  | 19   | 0   | 0   | 0   |
| 146 | 23  | 394 | 186  | 26  | 86  | 58  |
| 0   | 0   | 13  | 0    | 0   | 0   | 0   |
| 36  | 13  | 88  | 149  | 29  | 39  | 14  |
| 0   | 10  | 10  | 11   | 10  | 10  | 52  |
| 0   | 0   | 165 | 130  | 13  | 12  | 19  |
| 0   | 0   | 0   | 0    | 0   | 34  | 0   |
| 0   | 28  | 75  | 1019 | 0   | 13  | 99  |
| 0   | 0   | 0   | 0    | 0   | 0   | 0   |
| 11  | 0   | 0   | 0    | 0   | 0   | 0   |
| 23  | 0   | 16  | 10   | 0   | 0   | 0   |
| 0   | 0   | 0   | 0    | 0   | 0   | 10  |
| 0   | 0   | 0   | 10   | 0   | 0   | 0   |
| 0   | 0   | 59  | 19   | 0   | 0   | 18  |
| 0   | 0   | 133 | 0    | 0   | 0   | 0   |
| 54  | 67  | 304 | 251  | 96  | 199 | 361 |
| 12  | 0   | 119 | 87   | 65  | 160 | 116 |
| 99  | 41  | 299 | 260  | 155 | 417 | 266 |
| 0   | 0   | 0   | 0    | 0   | 0   | 0   |
| 0   | 0   | 0   | 376  | 0   | 0   | 12  |
| 0   | 0   | 47  | 653  | 0   | 112 | 80  |
| 0   | 0   | 0   | 195  | 0   | 16  | 0   |
| 0   | 0   | 12  | 815  | 0   | 141 | 69  |
| 0   | 0   | 0   | 0    | 0   | 0   | 0   |
| 0   | 0   | 34  | 0    | 0   | 0   | 0   |
| 0   | 0   | 0   | 78   | 0   | 12  | 0   |
| 29  | 0   | 47  | 122  | 25  | 136 | 40  |
| 30  | 0   | 145 | 66   | 0   | 21  | 12  |
| 0   | 0   | 43  | 59   | 0   | 0   | 12  |
| 40  | 37  | 396 | 545  | 23  | 11  | 83  |
| 11  | 0   | 94  | 42   | 23  | 0   | 49  |
| 0   | 0   | 0   | 109  | 0   | 0   | 32  |
| 0   | 0   | 0   | 49   | 0   | 0   | 0   |
| 0   | 0   | 38  | 12   | 0   | 0   | 0   |
| 0   | 0   | 63  | 0    | 0   | 0   | 0   |



|    |     |     |     |     |     |     |
|----|-----|-----|-----|-----|-----|-----|
| 0  | 0   | 0   | 148 | 19  | 0   | 14  |
| 89 | 23  | 609 | 644 | 97  | 11  | 42  |
| 0  | 0   | 171 | 22  | 0   | 0   | 0   |
| 23 | 0   | 158 | 56  | 0   | 0   | 0   |
| 0  | 45  | 0   | 10  | 0   | 0   | 0   |
| 0  | 0   | 0   | 34  | 143 | 78  | 11  |
| 0  | 0   | 0   | 51  | 81  | 108 | 26  |
| 0  | 0   | 23  | 13  | 0   | 0   | 0   |
| 0  | 41  | 168 | 58  | 32  | 11  | 104 |
| 12 | 0   | 41  | 201 | 18  | 385 | 153 |
| 0  | 0   | 26  | 121 | 40  | 54  | 47  |
| 0  | 0   | 0   | 110 | 0   | 43  | 36  |
| 0  | 0   | 0   | 0   | 0   | 0   | 0   |
| 0  | 0   | 0   | 0   | 0   | 0   | 0   |
| 0  | 0   | 0   | 0   | 0   | 0   | 0   |
| 0  | 0   | 0   | 0   | 0   | 11  | 0   |
| 0  | 46  | 24  | 108 | 51  | 258 | 45  |
| 0  | 46  | 0   | 31  | 0   | 34  | 0   |
| 37 | 0   | 0   | 26  | 0   | 53  | 31  |
| 0  | 25  | 10  | 46  | 0   | 0   | 0   |
| 40 | 0   | 479 | 132 | 182 | 153 | 230 |
| 0  | 0   | 0   | 0   | 0   | 0   | 0   |
| 0  | 0   | 0   | 0   | 0   | 0   | 0   |
| 0  | 0   | 0   | 0   | 0   | 0   | 0   |
| 0  | 0   | 0   | 0   | 0   | 0   | 0   |
| 0  | 26  | 0   | 29  | 10  | 174 | 0   |
| 0  | 0   | 0   | 19  | 0   | 0   | 0   |
| 13 | 80  | 0   | 0   | 41  | 67  | 0   |
| 0  | 0   | 0   | 0   | 0   | 0   | 0   |
| 0  | 0   | 0   | 0   | 0   | 0   | 0   |
| 0  | 0   | 0   | 10  | 0   | 0   | 0   |
| 0  | 0   | 0   | 0   | 0   | 0   | 0   |
| 0  | 0   | 0   | 0   | 0   | 0   | 0   |
| 0  | 0   | 0   | 0   | 0   | 0   | 0   |
| 0  | 0   | 0   | 0   | 0   | 0   | 0   |
| 0  | 145 | 0   | 10  | 0   | 0   | 0   |
| 0  | 23  | 0   | 0   | 0   | 0   | 0   |
| 10 | 24  | 23  | 37  | 12  | 710 | 10  |
| 28 | 256 | 70  | 132 | 100 | 554 | 50  |
| 0  | 0   | 0   | 0   | 0   | 10  | 0   |
| 12 | 27  | 22  | 42  | 28  | 154 | 12  |
| 0  | 0   | 0   | 14  | 0   | 12  | 0   |
| 54 | 17  | 12  | 132 | 601 | 528 | 33  |
| 0  | 30  | 0   | 0   | 0   | 0   | 0   |
| 0  | 0   | 0   | 0   | 0   | 0   | 0   |
| 71 | 0   | 0   | 0   | 74  | 314 | 40  |
| 24 | 28  | 0   | 111 | 38  | 67  | 51  |

|    |     |     |     |    |      |     |
|----|-----|-----|-----|----|------|-----|
| 0  | 0   | 0   | 0   | 0  | 0    | 0   |
| 0  | 0   | 0   | 0   | 0  | 0    | 0   |
| 13 | 77  | 15  | 0   | 35 | 84   | 0   |
| 44 | 10  | 0   | 32  | 39 | 28   | 48  |
| 0  | 0   | 14  | 0   | 13 | 155  | 0   |
| 0  | 0   | 0   | 0   | 0  | 27   | 0   |
| 0  | 0   | 0   | 0   | 0  | 0    | 0   |
| 26 | 68  | 21  | 33  | 33 | 263  | 46  |
| 0  | 0   | 0   | 0   | 0  | 0    | 0   |
| 25 | 0   | 0   | 0   | 39 | 171  | 0   |
| 0  | 106 | 0   | 37  | 0  | 107  | 36  |
| 12 | 0   | 14  | 0   | 0  | 31   | 0   |
| 0  | 10  | 0   | 57  | 11 | 26   | 0   |
| 0  | 0   | 0   | 0   | 0  | 0    | 0   |
| 0  | 0   | 12  | 44  | 35 | 30   | 0   |
| 0  | 0   | 0   | 0   | 0  | 0    | 0   |
| 0  | 0   | 0   | 0   | 0  | 0    | 0   |
| 0  | 0   | 0   | 0   | 0  | 0    | 0   |
| 0  | 0   | 0   | 12  | 0  | 87   | 0   |
| 0  | 0   | 0   | 30  | 0  | 12   | 0   |
| 0  | 0   | 0   | 10  | 0  | 0    | 0   |
| 0  | 0   | 0   | 0   | 0  | 0    | 0   |
| 0  | 0   | 0   | 0   | 0  | 0    | 0   |
| 0  | 0   | 0   | 0   | 0  | 0    | 0   |
| 0  | 0   | 0   | 0   | 0  | 0    | 0   |
| 0  | 0   | 0   | 0   | 0  | 0    | 0   |
| 0  | 0   | 0   | 0   | 0  | 0    | 0   |
| 0  | 41  | 0   | 34  | 0  | 48   | 0   |
| 32 | 0   | 10  | 31  | 0  | 0    | 0   |
| 11 | 0   | 0   | 0   | 0  | 0    | 0   |
| 0  | 0   | 0   | 0   | 0  | 0    | 0   |
| 14 | 0   | 13  | 41  | 0  | 15   | 11  |
| 0  | 0   | 10  | 0   | 0  | 30   | 0   |
| 0  | 0   | 0   | 0   | 0  | 0    | 0   |
| 0  | 0   | 0   | 0   | 0  | 0    | 0   |
| 80 | 14  | 101 | 92  | 53 | 2559 | 122 |
| 0  | 10  | 0   | 47  | 0  | 704  | 54  |
| 0  | 0   | 0   | 0   | 0  | 162  | 0   |
| 0  | 0   | 0   | 0   | 0  | 20   | 0   |
| 39 | 47  | 98  | 42  | 90 | 846  | 41  |
| 0  | 0   | 0   | 0   | 0  | 0    | 0   |
| 0  | 0   | 0   | 0   | 0  | 11   | 0   |
| 0  | 0   | 0   | 12  | 0  | 15   | 0   |
| 0  | 0   | 0   | 0   | 0  | 27   | 0   |
| 0  | 0   | 0   | 0   | 0  | 12   | 0   |
| 0  | 10  | 63  | 146 | 43 | 168  | 45  |
| 0  | 0   | 0   | 12  | 0  | 0    | 0   |

|     |    |     |     |     |     |     |
|-----|----|-----|-----|-----|-----|-----|
| 0   | 15 | 13  | 70  | 0   | 49  | 0   |
| 0   | 0  | 0   | 0   | 0   | 0   | 0   |
| 0   | 0  | 0   | 0   | 0   | 0   | 0   |
| 0   | 0  | 0   | 31  | 11  | 0   | 0   |
| 0   | 0  | 0   | 11  | 0   | 0   | 0   |
| 0   | 0  | 55  | 39  | 10  | 10  | 0   |
| 0   | 0  | 0   | 10  | 0   | 0   | 0   |
| 0   | 16 | 0   | 0   | 0   | 0   | 0   |
| 11  | 0  | 0   | 0   | 0   | 0   | 0   |
| 0   | 0  | 0   | 0   | 0   | 0   | 0   |
| 0   | 0  | 0   | 0   | 0   | 0   | 0   |
| 0   | 0  | 0   | 0   | 0   | 0   | 0   |
| 0   | 0  | 68  | 17  | 0   | 0   | 0   |
| 0   | 0  | 0   | 13  | 0   | 0   | 0   |
| 0   | 0  | 0   | 0   | 0   | 0   | 0   |
| 0   | 0  | 0   | 0   | 0   | 0   | 0   |
| 12  | 0  | 0   | 11  | 0   | 0   | 79  |
| 0   | 0  | 0   | 0   | 56  | 0   | 0   |
| 0   | 0  | 0   | 0   | 0   | 0   | 0   |
| 0   | 0  | 0   | 0   | 0   | 0   | 0   |
| 0   | 0  | 0   | 0   | 0   | 0   | 0   |
| 0   | 0  | 0   | 0   | 0   | 11  | 0   |
| 0   | 0  | 37  | 0   | 418 | 0   | 0   |
| 31  | 0  | 50  | 21  | 0   | 83  | 0   |
| 92  | 0  | 0   | 40  | 30  | 138 | 0   |
| 0   | 36 | 81  | 48  | 101 | 242 | 0   |
| 45  | 0  | 0   | 0   | 0   | 30  | 0   |
| 0   | 0  | 11  | 0   | 34  | 123 | 25  |
| 10  | 0  | 0   | 0   | 0   | 41  | 0   |
| 0   | 0  | 0   | 0   | 0   | 0   | 0   |
| 0   | 0  | 0   | 0   | 0   | 0   | 0   |
| 0   | 0  | 0   | 0   | 0   | 0   | 0   |
| 0   | 0  | 0   | 0   | 0   | 0   | 0   |
| 0   | 0  | 0   | 0   | 0   | 0   | 0   |
| 0   | 0  | 0   | 0   | 0   | 0   | 0   |
| 0   | 0  | 0   | 0   | 0   | 0   | 0   |
| 0   | 0  | 0   | 0   | 0   | 0   | 0   |
| 0   | 0  | 0   | 0   | 0   | 0   | 0   |
| 0   | 0  | 0   | 0   | 0   | 0   | 0   |
| 0   | 0  | 0   | 0   | 0   | 0   | 0   |
| 165 | 22 | 210 | 207 | 220 | 740 | 462 |
| 34  | 13 | 82  | 0   | 0   | 36  | 0   |
| 0   | 0  | 0   | 33  | 0   | 23  | 0   |
| 27  | 0  | 16  | 23  | 0   | 0   | 0   |
| 0   | 13 | 0   | 0   | 0   | 10  | 0   |
| 0   | 0  | 0   | 0   | 0   | 0   | 0   |

|      |    |     |     |     |      |     |
|------|----|-----|-----|-----|------|-----|
| 0    | 0  | 15  | 0   | 0   | 0    | 0   |
| 0    | 0  | 0   | 0   | 0   | 0    | 0   |
| 0    | 0  | 0   | 0   | 0   | 23   | 80  |
| 0    | 0  | 0   | 0   | 0   | 0    | 0   |
| 0    | 0  | 0   | 0   | 0   | 0    | 21  |
| 0    | 0  | 0   | 0   | 21  | 0    | 52  |
| 0    | 0  | 0   | 0   | 0   | 0    | 0   |
| 0    | 10 | 0   | 26  | 0   | 0    | 0   |
| 43   | 0  | 20  | 46  | 0   | 64   | 28  |
| 0    | 0  | 0   | 0   | 0   | 0    | 28  |
| 0    | 0  | 0   | 10  | 0   | 164  | 0   |
| 0    | 0  | 0   | 0   | 0   | 0    | 0   |
| 0    | 0  | 0   | 42  | 0   | 42   | 0   |
| 0    | 0  | 0   | 0   | 0   | 0    | 0   |
| 1196 | 54 | 131 | 195 | 155 | 84   | 43  |
| 31   | 0  | 25  | 0   | 84  | 183  | 14  |
| 0    | 0  | 0   | 26  | 24  | 78   | 0   |
| 280  | 0  | 77  | 24  | 436 | 35   | 0   |
| 0    | 0  | 0   | 0   | 0   | 0    | 0   |
| 0    | 0  | 0   | 0   | 0   | 240  | 0   |
| 0    | 0  | 12  | 0   | 0   | 99   | 0   |
| 23   | 49 | 78  | 98  | 10  | 52   | 0   |
| 0    | 0  | 0   | 0   | 0   | 0    | 0   |
| 0    | 0  | 0   | 0   | 0   | 0    | 0   |
| 0    | 0  | 0   | 0   | 0   | 0    | 0   |
| 0    | 0  | 0   | 0   | 0   | 0    | 0   |
| 0    | 0  | 0   | 0   | 0   | 0    | 0   |
| 34   | 40 | 75  | 372 | 239 | 1514 | 420 |
| 0    | 0  | 19  | 0   | 32  | 0    | 0   |
| 0    | 0  | 27  | 0   | 0   | 0    | 0   |
| 121  | 17 | 271 | 223 | 177 | 72   | 160 |
| 64   | 0  | 189 | 0   | 0   | 47   | 14  |
| 116  | 28 | 196 | 223 | 47  | 69   | 112 |
| 42   | 0  | 12  | 0   | 0   | 0    | 0   |
| 78   | 0  | 0   | 0   | 0   | 0    | 0   |
| 0    | 0  | 0   | 0   | 0   | 0    | 0   |
| 0    | 0  | 0   | 0   | 0   | 0    | 0   |
| 167  | 0  | 12  | 67  | 21  | 55   | 32  |
| 0    | 0  | 0   | 0   | 0   | 654  | 55  |
| 0    | 0  | 0   | 0   | 0   | 0    | 0   |
| 0    | 0  | 0   | 12  | 0   | 191  | 43  |
| 0    | 0  | 16  | 17  | 0   | 13   | 33  |
| 0    | 0  | 0   | 24  | 0   | 0    | 0   |
| 0    | 0  | 0   | 0   | 0   | 0    | 29  |
| 0    | 0  | 0   | 0   | 0   | 40   | 0   |
| 0    | 0  | 0   | 0   | 0   | 0    | 0   |

|    |    |     |     |     |     |     |
|----|----|-----|-----|-----|-----|-----|
| 0  | 0  | 0   | 0   | 0   | 0   | 0   |
| 0  | 0  | 0   | 0   | 0   | 0   | 0   |
| 0  | 0  | 0   | 0   | 0   | 0   | 0   |
| 0  | 0  | 0   | 0   | 0   | 0   | 0   |
| 0  | 11 | 0   | 0   | 11  | 95  | 0   |
| 10 | 0  | 0   | 0   | 0   | 0   | 0   |
| 0  | 0  | 0   | 30  | 0   | 167 | 0   |
| 0  | 0  | 0   | 0   | 0   | 0   | 10  |
| 0  | 0  | 13  | 29  | 17  | 558 | 116 |
| 0  | 0  | 0   | 16  | 76  | 239 | 36  |
| 11 | 0  | 0   | 0   | 0   | 51  | 0   |
| 16 | 40 | 36  | 12  | 0   | 556 | 27  |
| 0  | 0  | 0   | 0   | 0   | 0   | 0   |
| 0  | 0  | 0   | 0   | 0   | 39  | 0   |
| 0  | 28 | 45  | 42  | 0   | 293 | 0   |
| 0  | 0  | 35  | 64  | 81  | 15  | 0   |
| 0  | 0  | 0   | 0   | 0   | 0   | 0   |
| 0  | 0  | 0   | 0   | 0   | 43  | 0   |
| 0  | 0  | 12  | 167 | 165 | 290 | 161 |
| 0  | 0  | 0   | 26  | 161 | 0   | 0   |
| 20 | 0  | 0   | 177 | 0   | 23  | 0   |
| 0  | 0  | 10  | 11  | 0   | 56  | 0   |
| 0  | 0  | 0   | 0   | 0   | 51  | 13  |
| 0  | 0  | 0   | 19  | 0   | 0   | 0   |
| 0  | 0  | 0   | 0   | 0   | 0   | 0   |
| 0  | 0  | 13  | 31  | 0   | 0   | 0   |
| 0  | 0  | 0   | 0   | 0   | 0   | 0   |
| 0  | 0  | 0   | 0   | 0   | 0   | 0   |
| 0  | 13 | 0   | 0   | 0   | 0   | 10  |
| 0  | 64 | 0   | 0   | 0   | 0   | 0   |
| 0  | 0  | 0   | 0   | 0   | 0   | 0   |
| 0  | 0  | 0   | 10  | 0   | 0   | 0   |
| 0  | 0  | 102 | 265 | 112 | 0   | 0   |
| 0  | 17 | 12  | 126 | 0   | 0   | 44  |
| 0  | 0  | 0   | 0   | 0   | 0   | 0   |
| 15 | 56 | 25  | 30  | 0   | 46  | 0   |
| 0  | 24 | 0   | 11  | 0   | 37  | 10  |
| 0  | 12 | 0   | 52  | 0   | 11  | 0   |
| 0  | 0  | 0   | 0   | 0   | 0   | 0   |
| 0  | 0  | 0   | 0   | 0   | 0   | 0   |
| 14 | 0  | 31  | 0   | 0   | 0   | 0   |
| 0  | 0  | 11  | 0   | 0   | 0   | 0   |
| 0  | 10 | 0   | 10  | 0   | 0   | 0   |
| 0  | 0  | 0   | 0   | 0   | 0   | 0   |
| 43 | 0  | 0   | 12  | 0   | 36  | 0   |
| 0  | 0  | 0   | 0   | 0   | 34  | 0   |

|     |    |    |     |     |      |     |
|-----|----|----|-----|-----|------|-----|
| 13  | 0  | 0  | 0   | 0   | 42   | 0   |
| 10  | 0  | 0  | 0   | 22  | 35   | 0   |
| 26  | 0  | 0  | 0   | 0   | 43   | 0   |
| 0   | 21 | 27 | 25  | 44  | 2148 | 22  |
| 0   | 0  | 0  | 16  | 13  | 144  | 0   |
| 21  | 0  | 12 | 0   | 0   | 0    | 16  |
| 0   | 16 | 0  | 10  | 0   | 133  | 0   |
| 0   | 0  | 0  | 0   | 0   | 38   | 0   |
| 0   | 29 | 58 | 0   | 0   | 0    | 0   |
| 0   | 0  | 0  | 0   | 0   | 0    | 0   |
| 0   | 0  | 0  | 0   | 0   | 0    | 0   |
| 0   | 0  | 0  | 0   | 0   | 10   | 14  |
| 0   | 0  | 0  | 0   | 0   | 12   | 0   |
| 61  | 0  | 0  | 122 | 0   | 50   | 18  |
| 114 | 0  | 0  | 23  | 639 | 109  | 17  |
| 0   | 0  | 0  | 0   | 0   | 0    | 27  |
| 51  | 0  | 0  | 23  | 0   | 0    | 16  |
| 23  | 0  | 0  | 38  | 0   | 46   | 30  |
| 0   | 11 | 0  | 0   | 0   | 0    | 68  |
| 56  | 0  | 13 | 84  | 0   | 64   | 24  |
| 0   | 0  | 22 | 27  | 0   | 0    | 12  |
| 12  | 0  | 13 | 31  | 0   | 20   | 20  |
| 0   | 0  | 0  | 33  | 0   | 33   | 20  |
| 0   | 0  | 0  | 11  | 10  | 71   | 14  |
| 0   | 0  | 0  | 0   | 0   | 26   | 26  |
| 0   | 0  | 0  | 198 | 10  | 182  | 448 |
| 0   | 0  | 24 | 118 | 91  | 51   | 28  |
| 0   | 0  | 0  | 38  | 0   | 47   | 16  |
| 13  | 0  | 0  | 63  | 0   | 40   | 13  |
| 0   | 0  | 10 | 0   | 0   | 0    | 10  |
| 0   | 0  | 0  | 0   | 0   | 61   | 15  |
| 0   | 0  | 0  | 0   | 0   | 0    | 11  |
| 0   | 0  | 0  | 16  | 12  | 0    | 10  |
| 0   | 94 | 0  | 20  | 195 | 273  | 108 |
| 0   | 0  | 0  | 0   | 0   | 367  | 136 |
| 0   | 0  | 0  | 0   | 0   | 25   | 15  |
| 0   | 0  | 0  | 0   | 0   | 256  | 51  |
| 0   | 0  | 0  | 0   | 0   | 0    | 21  |
| 98  | 0  | 12 | 131 | 0   | 77   | 70  |
| 0   | 0  | 0  | 0   | 0   | 20   | 35  |
| 0   | 0  | 41 | 206 | 0   | 0    | 39  |
| 0   | 0  | 0  | 0   | 0   | 0    | 12  |
| 0   | 0  | 0  | 0   | 0   | 29   | 48  |
| 0   | 0  | 0  | 0   | 0   | 44   | 12  |
| 0   | 0  | 0  | 0   | 0   | 96   | 30  |
| 23  | 0  | 0  | 34  | 0   | 14   | 34  |

|     |    |     |     |     |      |     |
|-----|----|-----|-----|-----|------|-----|
| 0   | 0  | 0   | 101 | 0   | 210  | 12  |
| 0   | 0  | 0   | 0   | 0   | 119  | 120 |
| 0   | 0  | 0   | 0   | 0   | 43   | 10  |
| 0   | 21 | 0   | 29  | 0   | 133  | 10  |
| 0   | 0  | 0   | 37  | 0   | 219  | 13  |
| 0   | 0  | 0   | 0   | 0   | 37   | 106 |
| 0   | 0  | 41  | 33  | 0   | 0    | 13  |
| 0   | 0  | 12  | 95  | 0   | 0    | 33  |
| 0   | 0  | 15  | 33  | 0   | 0    | 13  |
| 0   | 0  | 234 | 272 | 25  | 12   | 77  |
| 0   | 0  | 0   | 0   | 0   | 0    | 12  |
| 0   | 0  | 0   | 80  | 0   | 73   | 78  |
| 0   | 0  | 23  | 26  | 0   | 0    | 24  |
| 0   | 0  | 0   | 0   | 0   | 0    | 10  |
| 0   | 0  | 0   | 0   | 0   | 0    | 28  |
| 0   | 0  | 0   | 0   | 0   | 0    | 21  |
| 0   | 0  | 75  | 0   | 10  | 17   | 34  |
| 52  | 0  | 0   | 0   | 55  | 17   | 10  |
| 45  | 0  | 24  | 11  | 12  | 216  | 10  |
| 0   | 46 | 103 | 117 | 241 | 90   | 52  |
| 61  | 0  | 38  | 0   | 340 | 642  | 28  |
| 0   | 0  | 40  | 21  | 12  | 14   | 14  |
| 0   | 0  | 0   | 0   | 0   | 33   | 13  |
| 0   | 0  | 0   | 0   | 0   | 0    | 37  |
| 0   | 0  | 0   | 0   | 0   | 13   | 11  |
| 0   | 0  | 0   | 29  | 0   | 65   | 14  |
| 197 | 0  | 0   | 74  | 811 | 392  | 100 |
| 0   | 0  | 0   | 83  | 309 | 1711 | 472 |
| 0   | 0  | 0   | 0   | 0   | 0    | 11  |
| 0   | 0  | 0   | 76  | 22  | 544  | 246 |
| 0   | 0  | 0   | 0   | 0   | 54   | 11  |
| 0   | 0  | 0   | 0   | 0   | 0    | 10  |
| 0   | 10 | 0   | 10  | 22  | 46   | 13  |
| 0   | 0  | 0   | 0   | 0   | 179  | 53  |
| 163 | 0  | 0   | 37  | 194 | 435  | 265 |
| 49  | 0  | 99  | 75  | 77  | 109  | 38  |
| 0   | 0  | 0   | 0   | 0   | 29   | 10  |
| 0   | 0  | 0   | 0   | 0   | 0    | 0   |
| 0   | 0  | 0   | 0   | 0   | 0    | 0   |
| 0   | 0  | 0   | 0   | 0   | 0    | 0   |
| 0   | 0  | 0   | 0   | 0   | 0    | 0   |
| 0   | 0  | 0   | 0   | 0   | 0    | 0   |
| 0   | 0  | 0   | 0   | 0   | 0    | 0   |
| 0   | 0  | 0   | 0   | 0   | 0    | 0   |
| 17  | 0  | 13  | 0   | 0   | 0    | 0   |

[illegible]



[illegible]

|     |     |    |     |    |     |   |
|-----|-----|----|-----|----|-----|---|
| 41  | 0   | 0  | 15  | 72 | 0   | 0 |
| 25  | 0   | 0  | 10  | 89 | 0   | 0 |
| 0   | 0   | 12 | 135 | 11 | 48  | 0 |
| 0   | 0   | 41 | 35  | 14 | 0   | 0 |
| 0   | 0   | 0  | 0   | 0  | 0   | 0 |
| 0   | 0   | 40 | 15  | 16 | 0   | 0 |
| 0   | 0   | 0  | 11  | 0  | 0   | 0 |
| 0   | 0   | 0  | 0   | 0  | 0   | 0 |
| 0   | 0   | 0  | 10  | 0  | 0   | 0 |
| 0   | 0   | 0  | 0   | 0  | 0   | 0 |
| 0   | 0   | 0  | 0   | 0  | 0   | 0 |
| 0   | 0   | 0  | 0   | 0  | 12  | 0 |
| 0   | 0   | 0  | 0   | 0  | 0   | 0 |
| 0   | 0   | 0  | 0   | 0  | 0   | 0 |
| 0   | 0   | 0  | 0   | 0  | 0   | 0 |
| 38  | 0   | 0  | 28  | 0  | 0   | 0 |
| 0   | 0   | 0  | 25  | 0  | 0   | 0 |
| 0   | 0   | 0  | 0   | 0  | 0   | 0 |
| 0   | 0   | 0  | 0   | 0  | 0   | 0 |
| 0   | 0   | 0  | 0   | 0  | 21  | 0 |
| 0   | 0   | 0  | 0   | 0  | 11  | 0 |
| 15  | 0   | 10 | 55  | 0  | 0   | 0 |
| 30  | 0   | 0  | 55  | 0  | 0   | 0 |
| 0   | 0   | 0  | 222 | 0  | 0   | 0 |
| 0   | 17  | 0  | 14  | 0  | 0   | 0 |
| 0   | 0   | 0  | 0   | 0  | 0   | 0 |
| 47  | 0   | 0  | 10  | 0  | 0   | 0 |
| 0   | 42  | 0  | 0   | 0  | 0   | 0 |
| 0   | 0   | 0  | 0   | 0  | 0   | 0 |
| 0   | 54  | 0  | 16  | 0  | 0   | 0 |
| 0   | 123 | 0  | 16  | 0  | 98  | 0 |
| 0   | 0   | 0  | 0   | 0  | 0   | 0 |
| 18  | 0   | 0  | 0   | 13 | 162 | 0 |
| 0   | 0   | 0  | 0   | 66 | 0   | 0 |
| 0   | 25  | 0  | 0   | 0  | 0   | 0 |
| 0   | 10  | 0  | 0   | 0  | 0   | 0 |
| 0   | 16  | 0  | 12  | 0  | 0   | 0 |
| 0   | 0   | 0  | 0   | 0  | 0   | 0 |
| 0   | 0   | 0  | 0   | 0  | 0   | 0 |
| 0   | 0   | 11 | 12  | 0  | 0   | 0 |
| 0   | 0   | 0  | 0   | 0  | 0   | 0 |
| 0   | 0   | 0  | 0   | 0  | 0   | 0 |
| 203 | 0   | 0  | 221 | 0  | 51  | 0 |
| 18  | 0   | 0  | 0   | 0  | 0   | 0 |
| 0   | 0   | 0  | 0   | 0  | 52  | 0 |
| 0   | 0   | 0  | 0   | 0  | 181 | 0 |

|     |    |     |    |     |     |   |
|-----|----|-----|----|-----|-----|---|
| 0   | 0  | 0   | 0  | 0   | 100 | 0 |
| 12  | 0  | 11  | 36 | 0   | 115 | 0 |
| 67  | 0  | 69  | 0  | 41  | 0   | 0 |
| 10  | 33 | 0   | 0  | 0   | 0   | 0 |
| 45  | 60 | 0   | 0  | 0   | 0   | 0 |
| 0   | 0  | 0   | 0  | 0   | 23  | 0 |
| 0   | 0  | 0   | 0  | 0   | 11  | 0 |
| 0   | 0  | 0   | 0  | 0   | 0   | 0 |
| 0   | 0  | 0   | 0  | 0   | 0   | 0 |
| 0   | 0  | 0   | 0  | 0   | 0   | 0 |
| 0   | 0  | 0   | 0  | 0   | 0   | 0 |
| 0   | 0  | 0   | 0  | 0   | 0   | 0 |
| 0   | 0  | 0   | 43 | 0   | 0   | 0 |
| 0   | 0  | 0   | 11 | 0   | 0   | 0 |
| 0   | 0  | 0   | 42 | 0   | 0   | 0 |
| 0   | 0  | 0   | 0  | 0   | 0   | 0 |
| 0   | 0  | 0   | 0  | 0   | 0   | 0 |
| 0   | 0  | 0   | 0  | 0   | 0   | 0 |
| 0   | 0  | 55  | 0  | 11  | 0   | 0 |
| 0   | 0  | 0   | 0  | 0   | 0   | 0 |
| 26  | 0  | 0   | 0  | 11  | 0   | 0 |
| 156 | 0  | 40  | 52 | 0   | 0   | 0 |
| 0   | 0  | 0   | 10 | 0   | 0   | 0 |
| 0   | 0  | 0   | 46 | 0   | 0   | 0 |
| 0   | 0  | 106 | 0  | 0   | 0   | 0 |
| 0   | 0  | 217 | 0  | 0   | 12  | 0 |
| 0   | 0  | 0   | 0  | 0   | 0   | 0 |
| 0   | 0  | 0   | 0  | 12  | 10  | 0 |
| 0   | 0  | 0   | 0  | 0   | 0   | 0 |
| 0   | 0  | 0   | 0  | 0   | 0   | 0 |
| 0   | 0  | 0   | 0  | 0   | 0   | 0 |
| 0   | 0  | 0   | 0  | 0   | 0   | 0 |
| 0   | 0  | 0   | 0  | 0   | 0   | 0 |
| 0   | 0  | 0   | 26 | 0   | 0   | 0 |
| 0   | 0  | 0   | 49 | 30  | 0   | 0 |
| 0   | 0  | 0   | 11 | 0   | 0   | 0 |
| 22  | 0  | 0   | 0  | 18  | 21  | 0 |
| 0   | 24 | 0   | 0  | 0   | 0   | 0 |
| 0   | 10 | 0   | 0  | 0   | 10  | 0 |
| 0   | 10 | 0   | 0  | 0   | 0   | 0 |
| 0   | 16 | 0   | 12 | 21  | 34  | 0 |
| 0   | 0  | 0   | 0  | 0   | 25  | 0 |
| 0   | 0  | 0   | 0  | 0   | 11  | 0 |
| 0   | 0  | 0   | 0  | 0   | 12  | 0 |
| 0   | 0  | 0   | 14 | 242 | 118 | 0 |
| 0   | 0  | 10  | 0  | 0   | 0   | 0 |
| 0   | 0  | 0   | 0  | 0   | 0   | 0 |
| 0   | 0  | 0   | 0  | 0   | 0   | 0 |
| 0   | 76 | 0   | 0  | 0   | 33  | 0 |

[illegible]

|    |     |     |    |     |    |   |
|----|-----|-----|----|-----|----|---|
| 10 | 0   | 0   | 0  | 0   | 87 | 0 |
| 20 | 0   | 0   | 18 | 0   | 0  | 0 |
| 0  | 0   | 33  | 11 | 128 | 0  | 0 |
| 0  | 0   | 0   | 0  | 0   | 0  | 0 |
| 0  | 0   | 0   | 0  | 0   | 0  | 0 |
| 0  | 0   | 0   | 0  | 0   | 0  | 0 |
| 0  | 0   | 0   | 0  | 0   | 0  | 0 |
| 0  | 0   | 46  | 0  | 0   | 0  | 0 |
| 0  | 0   | 0   | 0  | 0   | 0  | 0 |
| 10 | 0   | 0   | 54 | 22  | 0  | 0 |
| 0  | 0   | 0   | 0  | 0   | 0  | 0 |
| 0  | 0   | 0   | 0  | 0   | 0  | 0 |
| 0  | 0   | 0   | 0  | 0   | 0  | 0 |
| 0  | 0   | 0   | 0  | 0   | 0  | 0 |
| 0  | 0   | 0   | 0  | 0   | 12 | 0 |
| 0  | 0   | 0   | 0  | 0   | 0  | 0 |
| 0  | 0   | 0   | 22 | 0   | 0  | 0 |
| 81 | 0   | 68  | 0  | 0   | 30 | 0 |
| 0  | 0   | 0   | 0  | 0   | 0  | 0 |
| 0  | 0   | 0   | 0  | 0   | 0  | 0 |
| 0  | 0   | 0   | 0  | 0   | 0  | 0 |
| 0  | 0   | 0   | 0  | 0   | 0  | 0 |
| 0  | 0   | 0   | 0  | 0   | 0  | 0 |
| 0  | 0   | 0   | 0  | 0   | 0  | 0 |
| 0  | 176 | 59  | 0  | 0   | 77 | 0 |
| 0  | 0   | 0   | 11 | 32  | 0  | 0 |
| 0  | 0   | 0   | 0  | 0   | 0  | 0 |
| 0  | 0   | 0   | 0  | 0   | 0  | 0 |
| 0  | 38  | 95  | 0  | 0   | 0  | 0 |
| 0  | 82  | 54  | 0  | 0   | 0  | 0 |
| 0  | 207 | 373 | 0  | 0   | 0  | 0 |
| 10 | 0   | 0   | 0  | 0   | 45 | 0 |
| 0  | 0   | 0   | 0  | 0   | 0  | 0 |
| 0  | 0   | 0   | 0  | 0   | 0  | 0 |
| 0  | 114 | 43  | 0  | 0   | 0  | 0 |
| 0  | 90  | 0   | 46 | 12  | 0  | 0 |
| 0  | 0   | 0   | 32 | 0   | 0  | 0 |
| 0  | 0   | 0   | 0  | 0   | 0  | 0 |
| 0  | 0   | 0   | 0  | 0   | 0  | 0 |
| 0  | 0   | 0   | 0  | 0   | 0  | 0 |
| 0  | 0   | 63  | 0  | 0   | 0  | 0 |
| 0  | 0   | 0   | 0  | 0   | 0  | 0 |
| 0  | 24  | 0   | 0  | 0   | 0  | 0 |
| 0  | 0   | 0   | 10 | 15  | 0  | 0 |
| 0  | 0   | 0   | 0  | 17  | 0  | 0 |
| 0  | 34  | 0   | 0  | 0   | 0  | 0 |
| 0  | 0   | 0   | 0  | 36  | 0  | 0 |

[illegible]

|    |    |    |     |     |     |   |
|----|----|----|-----|-----|-----|---|
| 0  | 0  | 0  | 0   | 0   | 22  | 0 |
| 0  | 0  | 0  | 0   | 0   | 0   | 0 |
| 0  | 0  | 0  | 0   | 0   | 0   | 0 |
| 0  | 0  | 0  | 0   | 0   | 0   | 0 |
| 0  | 0  | 0  | 0   | 0   | 0   | 0 |
| 0  | 0  | 0  | 0   | 0   | 0   | 0 |
| 0  | 0  | 0  | 0   | 0   | 0   | 0 |
| 0  | 0  | 0  | 0   | 0   | 31  | 0 |
| 0  | 0  | 0  | 0   | 0   | 0   | 0 |
| 17 | 0  | 11 | 0   | 0   | 0   | 0 |
| 0  | 0  | 0  | 0   | 0   | 0   | 0 |
| 0  | 0  | 0  | 0   | 0   | 0   | 0 |
| 0  | 10 | 0  | 0   | 0   | 0   | 0 |
| 0  | 98 | 0  | 0   | 0   | 0   | 0 |
| 0  | 27 | 50 | 0   | 383 | 607 | 0 |
| 0  | 12 | 0  | 0   | 0   | 0   | 0 |
| 0  | 13 | 0  | 0   | 0   | 0   | 0 |
| 0  | 26 | 0  | 0   | 0   | 0   | 0 |
| 0  | 33 | 0  | 0   | 0   | 0   | 0 |
| 0  | 29 | 35 | 10  | 0   | 0   | 0 |
| 0  | 11 | 0  | 0   | 0   | 0   | 0 |
| 0  | 46 | 0  | 0   | 0   | 0   | 0 |
| 0  | 60 | 0  | 0   | 0   | 0   | 0 |
| 0  | 85 | 0  | 23  | 0   | 0   | 0 |
| 0  | 12 | 0  | 255 | 10  | 0   | 0 |
| 0  | 0  | 0  | 0   | 0   | 0   | 0 |
| 13 | 0  | 0  | 0   | 0   | 0   | 0 |
| 0  | 0  | 0  | 0   | 0   | 0   | 0 |
| 0  | 0  | 0  | 0   | 0   | 32  | 0 |
| 0  | 0  | 0  | 0   | 0   | 0   | 0 |
| 0  | 0  | 0  | 0   | 0   | 11  | 0 |
| 48 | 0  | 0  | 0   | 0   | 0   | 0 |
| 0  | 0  | 0  | 0   | 0   | 0   | 0 |
| 0  | 0  | 0  | 0   | 0   | 0   | 0 |
| 55 | 0  | 0  | 0   | 0   | 0   | 0 |
| 0  | 0  | 0  | 0   | 0   | 0   | 0 |
| 0  | 0  | 0  | 0   | 0   | 0   | 0 |
| 0  | 0  | 0  | 0   | 0   | 0   | 0 |
| 0  | 0  | 0  | 44  | 0   | 0   | 0 |
| 0  | 0  | 0  | 0   | 0   | 0   | 0 |
| 0  | 0  | 0  | 0   | 0   | 0   | 0 |
| 0  | 0  | 0  | 0   | 0   | 0   | 0 |
| 0  | 0  | 0  | 24  | 0   | 0   | 0 |
| 0  | 0  | 0  | 0   | 0   | 0   | 0 |
| 39 | 0  | 0  | 0   | 0   | 0   | 0 |
| 0  | 0  | 0  | 0   | 0   | 0   | 0 |

|    |   |    |     |    |     |   |
|----|---|----|-----|----|-----|---|
| 0  | 0 | 0  | 0   | 0  | 0   | 0 |
| 0  | 0 | 0  | 0   | 0  | 0   | 0 |
| 0  | 0 | 0  | 0   | 0  | 0   | 0 |
| 0  | 0 | 0  | 0   | 0  | 0   | 0 |
| 0  | 0 | 0  | 23  | 0  | 0   | 0 |
| 0  | 0 | 0  | 0   | 0  | 0   | 0 |
| 0  | 0 | 0  | 115 | 0  | 0   | 0 |
| 0  | 0 | 0  | 49  | 17 | 0   | 0 |
| 0  | 0 | 0  | 0   | 0  | 0   | 0 |
| 14 | 0 | 32 | 0   | 0  | 0   | 0 |
| 0  | 0 | 0  | 0   | 10 | 0   | 0 |
| 0  | 0 | 0  | 0   | 0  | 0   | 0 |
| 0  | 0 | 0  | 0   | 0  | 56  | 0 |
| 0  | 0 | 0  | 0   | 0  | 0   | 0 |
| 0  | 0 | 0  | 0   | 0  | 0   | 0 |
| 0  | 0 | 0  | 0   | 0  | 34  | 0 |
| 0  | 0 | 0  | 52  | 16 | 18  | 0 |
| 0  | 0 | 0  | 0   | 0  | 62  | 0 |
| 0  | 0 | 0  | 0   | 0  | 0   | 0 |
| 0  | 0 | 0  | 0   | 0  | 198 | 0 |
| 0  | 0 | 0  | 0   | 0  | 0   | 0 |
| 10 | 0 | 0  | 12  | 0  | 28  | 0 |
| 0  | 0 | 0  | 0   | 0  | 0   | 0 |
| 0  | 0 | 0  | 0   | 0  | 0   | 0 |
| 0  | 0 | 0  | 15  | 0  | 15  | 0 |
| 0  | 0 | 0  | 0   | 0  | 46  | 0 |
| 0  | 0 | 0  | 10  | 0  | 113 | 0 |
| 0  | 0 | 43 | 13  | 0  | 0   | 0 |
| 0  | 0 | 0  | 0   | 0  | 0   | 0 |
| 0  | 0 | 0  | 0   | 0  | 0   | 0 |
| 0  | 0 | 0  | 0   | 0  | 0   | 0 |
| 0  | 0 | 0  | 0   | 0  | 0   | 0 |
| 0  | 0 | 0  | 0   | 0  | 0   | 0 |
| 0  | 0 | 0  | 0   | 0  | 22  | 0 |
| 0  | 0 | 0  | 25  | 0  | 0   | 0 |
| 0  | 0 | 0  | 0   | 0  | 0   | 0 |
| 42 | 0 | 0  | 0   | 0  | 0   | 0 |
| 0  | 0 | 0  | 0   | 0  | 64  | 0 |
| 0  | 0 | 0  | 0   | 0  | 44  | 0 |
| 28 | 0 | 0  | 0   | 0  | 25  | 0 |
| 0  | 0 | 0  | 15  | 0  | 20  | 0 |
| 0  | 0 | 0  | 0   | 0  | 50  | 0 |
| 14 | 0 | 0  | 0   | 0  | 0   | 0 |
| 0  | 0 | 0  | 20  | 0  | 128 | 0 |
| 0  | 0 | 0  | 0   | 0  | 285 | 0 |
| 0  | 0 | 0  | 0   | 0  | 20  | 0 |



|    |   |    |    |    |     |   |
|----|---|----|----|----|-----|---|
| 0  | 0 | 0  | 21 | 0  | 13  | 0 |
| 0  | 0 | 0  | 0  | 0  | 0   | 0 |
| 11 | 0 | 0  | 14 | 0  | 0   | 0 |
| 0  | 0 | 0  | 0  | 0  | 0   | 0 |
| 0  | 0 | 0  | 0  | 0  | 10  | 0 |
| 0  | 0 | 0  | 0  | 0  | 76  | 0 |
| 31 | 0 | 0  | 0  | 0  | 60  | 0 |
| 41 | 0 | 0  | 0  | 0  | 43  | 0 |
| 0  | 0 | 0  | 0  | 0  | 29  | 0 |
| 0  | 0 | 0  | 0  | 0  | 205 | 0 |
| 0  | 0 | 0  | 0  | 0  | 66  | 0 |
| 0  | 0 | 0  | 0  | 0  | 0   | 0 |
| 0  | 0 | 0  | 0  | 0  | 0   | 0 |
| 0  | 0 | 0  | 0  | 0  | 0   | 0 |
| 0  | 0 | 0  | 0  | 0  | 0   | 0 |
| 0  | 0 | 0  | 0  | 0  | 0   | 0 |
| 0  | 0 | 0  | 0  | 0  | 10  | 0 |
| 0  | 0 | 0  | 0  | 0  | 70  | 0 |
| 0  | 0 | 0  | 53 | 0  | 478 | 0 |
| 0  | 0 | 0  | 0  | 0  | 0   | 0 |
| 0  | 0 | 0  | 0  | 0  | 0   | 0 |
| 0  | 0 | 0  | 49 | 0  | 99  | 0 |
| 0  | 0 | 0  | 0  | 0  | 0   | 0 |
| 0  | 0 | 0  | 0  | 0  | 0   | 0 |
| 0  | 0 | 0  | 0  | 0  | 0   | 0 |
| 0  | 0 | 0  | 0  | 0  | 0   | 0 |
| 0  | 0 | 0  | 22 | 0  | 10  | 0 |
| 0  | 0 | 0  | 0  | 0  | 0   | 0 |
| 0  | 0 | 0  | 0  | 0  | 0   | 0 |
| 0  | 0 | 0  | 0  | 0  | 0   | 0 |
| 0  | 0 | 0  | 0  | 0  | 0   | 0 |
| 0  | 0 | 0  | 0  | 0  | 0   | 0 |
| 0  | 0 | 0  | 0  | 0  | 0   | 0 |
| 0  | 0 | 11 | 0  | 0  | 0   | 0 |
| 0  | 0 | 0  | 34 | 0  | 0   | 0 |
| 0  | 0 | 0  | 0  | 0  | 0   | 0 |
| 0  | 0 | 0  | 0  | 0  | 0   | 0 |
| 0  | 0 | 0  | 0  | 0  | 0   | 0 |
| 0  | 0 | 0  | 0  | 0  | 0   | 0 |
| 0  | 0 | 0  | 0  | 0  | 0   | 0 |
| 0  | 0 | 0  | 0  | 0  | 0   | 0 |
| 0  | 0 | 0  | 0  | 0  | 0   | 0 |
| 0  | 0 | 0  | 11 | 0  | 0   | 0 |
| 0  | 0 | 0  | 0  | 0  | 0   | 0 |
| 0  | 0 | 0  | 0  | 51 | 0   | 0 |
| 0  | 0 | 0  | 10 | 43 | 0   | 0 |
| 0  | 0 | 0  | 0  | 0  | 0   | 0 |
| 0  | 0 | 0  | 0  | 0  | 0   | 0 |
| 0  | 0 | 0  | 0  | 0  | 0   | 0 |
| 0  | 0 | 0  | 0  | 0  | 0   | 0 |

[illegible]

|    |   |    |    |     |    |   |
|----|---|----|----|-----|----|---|
| 0  | 0 | 0  | 0  | 0   | 0  | 0 |
| 0  | 0 | 0  | 0  | 120 | 10 | 0 |
| 0  | 0 | 0  | 10 | 174 | 0  | 0 |
| 0  | 0 | 0  | 0  | 0   | 0  | 0 |
| 0  | 0 | 0  | 0  | 0   | 0  | 0 |
| 0  | 0 | 0  | 13 | 0   | 29 | 0 |
| 0  | 0 | 0  | 0  | 0   | 0  | 0 |
| 0  | 0 | 0  | 0  | 0   | 0  | 0 |
| 10 | 0 | 0  | 0  | 0   | 0  | 0 |
| 0  | 0 | 0  | 0  | 0   | 0  | 0 |
| 0  | 0 | 0  | 0  | 0   | 0  | 0 |
| 0  | 0 | 0  | 0  | 0   | 0  | 0 |
| 0  | 0 | 0  | 0  | 0   | 0  | 0 |
| 0  | 0 | 0  | 0  | 0   | 0  | 0 |
| 0  | 0 | 0  | 0  | 0   | 0  | 0 |
| 22 | 0 | 0  | 0  | 0   | 0  | 0 |
| 0  | 0 | 0  | 0  | 0   | 0  | 0 |
| 0  | 0 | 0  | 0  | 0   | 0  | 0 |
| 0  | 0 | 23 | 0  | 0   | 0  | 0 |
| 0  | 0 | 0  | 0  | 0   | 0  | 0 |
| 0  | 0 | 0  | 0  | 0   | 0  | 0 |
| 0  | 0 | 29 | 0  | 0   | 0  | 0 |
| 0  | 0 | 0  | 0  | 0   | 0  | 0 |
| 0  | 0 | 0  | 0  | 0   | 0  | 0 |
| 0  | 0 | 0  | 0  | 0   | 0  | 0 |
| 0  | 0 | 0  | 0  | 0   | 0  | 0 |
| 0  | 0 | 0  | 0  | 0   | 0  | 0 |
| 0  | 0 | 0  | 0  | 0   | 0  | 0 |
| 0  | 0 | 31 | 0  | 0   | 28 | 0 |
| 0  | 0 | 34 | 0  | 0   | 0  | 0 |
| 0  | 0 | 0  | 0  | 0   | 0  | 0 |
| 0  | 0 | 0  | 0  | 0   | 0  | 0 |
| 0  | 0 | 0  | 0  | 0   | 0  | 0 |
| 13 | 0 | 0  | 40 | 0   | 0  | 0 |
| 0  | 0 | 12 | 68 | 0   | 0  | 0 |
| 0  | 0 | 0  | 0  | 47  | 0  | 0 |
| 0  | 0 | 0  | 0  | 11  | 0  | 0 |
| 0  | 0 | 0  | 0  | 35  | 31 | 0 |
| 0  | 0 | 19 | 0  | 17  | 64 | 0 |
| 0  | 0 | 0  | 0  | 13  | 0  | 0 |
| 34 | 0 | 0  | 0  | 11  | 0  | 0 |
| 0  | 0 | 0  | 0  | 12  | 0  | 0 |
| 13 | 0 | 0  | 0  | 11  | 0  | 0 |
| 31 | 0 | 0  | 0  | 172 | 0  | 0 |
| 0  | 0 | 0  | 0  | 10  | 0  | 0 |
| 0  | 0 | 0  | 0  | 10  | 0  | 0 |

|    |   |    |    |    |     |   |
|----|---|----|----|----|-----|---|
| 0  | 0 | 0  | 0  | 10 | 0   | 0 |
| 0  | 0 | 0  | 0  | 69 | 0   | 0 |
| 0  | 0 | 0  | 0  | 0  | 0   | 0 |
| 0  | 0 | 0  | 0  | 0  | 0   | 0 |
| 0  | 0 | 0  | 0  | 0  | 0   | 0 |
| 0  | 0 | 0  | 0  | 0  | 0   | 0 |
| 0  | 0 | 0  | 0  | 0  | 0   | 0 |
| 41 | 0 | 12 | 0  | 0  | 0   | 0 |
| 0  | 0 | 0  | 0  | 0  | 0   | 0 |
| 0  | 0 | 0  | 0  | 0  | 25  | 0 |
| 0  | 0 | 0  | 0  | 0  | 0   | 0 |
| 0  | 0 | 0  | 0  | 0  | 0   | 0 |
| 0  | 0 | 0  | 0  | 0  | 0   | 0 |
| 0  | 0 | 0  | 0  | 0  | 0   | 0 |
| 0  | 0 | 0  | 0  | 0  | 0   | 0 |
| 0  | 0 | 11 | 0  | 0  | 0   | 0 |
| 0  | 0 | 10 | 0  | 0  | 0   | 0 |
| 19 | 0 | 0  | 26 | 0  | 0   | 0 |
| 0  | 0 | 0  | 0  | 0  | 0   | 0 |
| 0  | 0 | 0  | 0  | 0  | 26  | 0 |
| 0  | 0 | 0  | 0  | 0  | 0   | 0 |
| 0  | 0 | 0  | 0  | 0  | 0   | 0 |
| 0  | 0 | 0  | 0  | 0  | 0   | 0 |
| 0  | 0 | 0  | 0  | 0  | 0   | 0 |
| 0  | 0 | 0  | 0  | 0  | 0   | 0 |
| 0  | 0 | 0  | 0  | 0  | 0   | 0 |
| 0  | 0 | 0  | 0  | 0  | 0   | 0 |
| 0  | 0 | 0  | 0  | 0  | 0   | 0 |
| 0  | 0 | 0  | 0  | 0  | 0   | 0 |
| 0  | 0 | 0  | 0  | 0  | 0   | 0 |
| 0  | 0 | 0  | 0  | 0  | 0   | 0 |
| 0  | 0 | 0  | 0  | 0  | 86  | 0 |
| 0  | 0 | 0  | 0  | 0  | 102 | 0 |
| 0  | 0 | 0  | 0  | 0  | 0   | 0 |
| 0  | 0 | 0  | 0  | 0  | 49  | 0 |
| 0  | 0 | 0  | 0  | 0  | 0   | 0 |
| 0  | 0 | 0  | 0  | 0  | 0   | 0 |
| 0  | 0 | 0  | 0  | 0  | 0   | 0 |
| 0  | 0 | 0  | 0  | 0  | 0   | 0 |
| 30 | 0 | 0  | 0  | 0  | 0   | 0 |
| 0  | 0 | 0  | 0  | 0  | 0   | 0 |
| 37 | 0 | 0  | 0  | 0  | 0   | 0 |
| 27 | 0 | 0  | 28 | 0  | 54  | 0 |
| 0  | 0 | 0  | 0  | 0  | 0   | 0 |
| 0  | 0 | 0  | 0  | 0  | 0   | 0 |
| 33 | 0 | 0  | 0  | 0  | 0   | 0 |
| 0  | 0 | 0  | 0  | 0  | 0   | 0 |
| 0  | 0 | 0  | 0  | 0  | 0   | 0 |

|    |   |    |    |   |    |   |
|----|---|----|----|---|----|---|
| 0  | 0 | 0  | 0  | 0 | 0  | 0 |
| 0  | 0 | 0  | 0  | 0 | 0  | 0 |
| 0  | 0 | 0  | 0  | 0 | 16 | 0 |
| 0  | 0 | 0  | 0  | 0 | 0  | 0 |
| 43 | 0 | 0  | 0  | 0 | 0  | 0 |
| 13 | 0 | 0  | 0  | 0 | 0  | 0 |
| 0  | 0 | 0  | 0  | 0 | 0  | 0 |
| 0  | 0 | 0  | 0  | 0 | 0  | 0 |
| 0  | 0 | 0  | 0  | 0 | 0  | 0 |
| 0  | 0 | 0  | 0  | 0 | 0  | 0 |
| 0  | 0 | 0  | 10 | 0 | 0  | 0 |
| 58 | 0 | 0  | 0  | 0 | 0  | 0 |
| 0  | 0 | 0  | 0  | 0 | 0  | 0 |
| 0  | 0 | 0  | 0  | 0 | 0  | 0 |
| 0  | 0 | 0  | 0  | 0 | 0  | 0 |
| 0  | 0 | 0  | 0  | 0 | 0  | 0 |
| 0  | 0 | 12 | 36 | 0 | 0  | 0 |
| 0  | 0 | 0  | 10 | 0 | 0  | 0 |
| 17 | 0 | 0  | 0  | 0 | 0  | 0 |
| 0  | 0 | 0  | 0  | 0 | 0  | 0 |
| 0  | 0 | 0  | 0  | 0 | 0  | 0 |
| 0  | 0 | 0  | 0  | 0 | 0  | 0 |
| 0  | 0 | 0  | 0  | 0 | 0  | 0 |
| 0  | 0 | 0  | 0  | 0 | 0  | 0 |
| 0  | 0 | 0  | 0  | 0 | 16 | 0 |
| 0  | 0 | 0  | 0  | 0 | 0  | 0 |
| 0  | 0 | 0  | 0  | 0 | 0  | 0 |
| 0  | 0 | 11 | 0  | 0 | 0  | 0 |
| 0  | 0 | 0  | 0  | 0 | 0  | 0 |
| 0  | 0 | 0  | 0  | 0 | 0  | 0 |
| 0  | 0 | 0  | 0  | 0 | 0  | 0 |
| 0  | 0 | 0  | 0  | 0 | 0  | 0 |
| 21 | 0 | 0  | 0  | 0 | 0  | 0 |
| 0  | 0 | 0  | 0  | 0 | 0  | 0 |
| 0  | 0 | 0  | 0  | 0 | 77 | 0 |
| 0  | 0 | 0  | 0  | 0 | 0  | 0 |
| 0  | 0 | 0  | 0  | 0 | 0  | 0 |
| 0  | 0 | 0  | 0  | 0 | 0  | 0 |
| 0  | 0 | 0  | 0  | 0 | 0  | 0 |
| 0  | 0 | 0  | 0  | 0 | 0  | 0 |
| 0  | 0 | 0  | 0  | 0 | 0  | 0 |
| 0  | 0 | 0  | 0  | 0 | 0  | 0 |
| 0  | 0 | 0  | 0  | 0 | 0  | 0 |
| 0  | 0 | 0  | 0  | 0 | 0  | 0 |
| 0  | 0 | 10 | 0  | 0 | 0  | 0 |
| 0  | 0 | 0  | 0  | 0 | 0  | 0 |
| 0  | 0 | 0  | 0  | 0 | 0  | 0 |

[illegible]

[illegible]

[illegible]



[illegible]

[illegible]

[illegible]

[illegible]

[illegible]

[illegible]

|   |   |   |   |   |    |   |
|---|---|---|---|---|----|---|
| 0 | 0 | 0 | 0 | 0 | 0  | 0 |
| 0 | 0 | 0 | 0 | 0 | 0  | 0 |
| 0 | 0 | 0 | 0 | 0 | 0  | 0 |
| 0 | 0 | 0 | 0 | 0 | 0  | 0 |
| 0 | 0 | 0 | 0 | 0 | 0  | 0 |
| 0 | 0 | 0 | 0 | 0 | 0  | 0 |
| 0 | 0 | 0 | 0 | 0 | 10 | 0 |
| 0 | 0 | 0 | 0 | 0 | 0  | 0 |
| 0 | 0 | 0 | 0 | 0 | 0  | 0 |
| 0 | 0 | 0 | 0 | 0 | 0  | 0 |
| 0 | 0 | 0 | 0 | 0 | 0  | 0 |
| 0 | 0 | 0 | 0 | 0 | 0  | 0 |
| 0 | 0 | 0 | 0 | 0 | 0  | 0 |
| 0 | 0 | 0 | 0 | 0 | 0  | 0 |
| 0 | 0 | 0 | 0 | 0 | 0  | 0 |
| 0 | 0 | 0 | 0 | 0 | 0  | 0 |
| 0 | 0 | 0 | 0 | 0 | 0  | 0 |
| 0 | 0 | 0 | 0 | 0 | 0  | 0 |
| 0 | 0 | 0 | 0 | 0 | 0  | 0 |
| 0 | 0 | 0 | 0 | 0 | 0  | 0 |
| 0 | 0 | 0 | 0 | 0 | 0  | 0 |
| 0 | 0 | 0 | 0 | 0 | 53 | 0 |
| 0 | 0 | 0 | 0 | 0 | 0  | 0 |
| 0 | 0 | 0 | 0 | 0 | 11 | 0 |
| 0 | 0 | 0 | 0 | 0 | 0  | 0 |
| 0 | 0 | 0 | 0 | 0 | 0  | 0 |
| 0 | 0 | 0 | 0 | 0 | 0  | 0 |
| 0 | 0 | 0 | 0 | 0 | 0  | 0 |
| 0 | 0 | 0 | 0 | 0 | 0  | 0 |
| 0 | 0 | 0 | 0 | 0 | 0  | 0 |
| 0 | 0 | 0 | 0 | 0 | 0  | 0 |
| 0 | 0 | 0 | 0 | 0 | 0  | 0 |
| 0 | 0 | 0 | 0 | 0 | 0  | 0 |
| 0 | 0 | 0 | 0 | 0 | 0  | 0 |
| 0 | 0 | 0 | 0 | 0 | 12 | 0 |
| 0 | 0 | 0 | 0 | 0 | 10 | 0 |
| 0 | 0 | 0 | 0 | 0 | 44 | 0 |
| 0 | 0 | 0 | 0 | 0 | 19 | 0 |
| 0 | 0 | 0 | 0 | 0 | 12 | 0 |
| 0 | 0 | 0 | 0 | 0 | 34 | 0 |
| 0 | 0 | 0 | 0 | 0 | 12 | 0 |
| 0 | 0 | 0 | 0 | 0 | 10 | 0 |
| 0 | 0 | 0 | 0 | 0 | 33 | 0 |
| 0 | 0 | 0 | 0 | 0 | 29 | 0 |
| 0 | 0 | 0 | 0 | 0 | 10 | 0 |
| 0 | 0 | 0 | 0 | 0 | 20 | 0 |
| 0 | 0 | 0 | 0 | 0 | 26 | 0 |
| 0 | 0 | 0 | 0 | 0 | 54 | 0 |

[illegible]



[illegible]

|   |   |   |    |   |   |   |
|---|---|---|----|---|---|---|
| 0 | 0 | 0 | 0  | 0 | 0 | 0 |
| 0 | 0 | 0 | 0  | 0 | 0 | 0 |
| 0 | 0 | 0 | 0  | 0 | 0 | 0 |
| 0 | 0 | 0 | 0  | 0 | 0 | 0 |
| 0 | 0 | 0 | 0  | 0 | 0 | 0 |
| 0 | 0 | 0 | 0  | 0 | 0 | 0 |
| 0 | 0 | 0 | 0  | 0 | 0 | 0 |
| 0 | 0 | 0 | 0  | 0 | 0 | 0 |
| 0 | 0 | 0 | 0  | 0 | 0 | 0 |
| 0 | 0 | 0 | 0  | 0 | 0 | 0 |
| 0 | 0 | 0 | 0  | 0 | 0 | 0 |
| 0 | 0 | 0 | 0  | 0 | 0 | 0 |
| 0 | 0 | 0 | 0  | 0 | 0 | 0 |
| 0 | 0 | 0 | 0  | 0 | 0 | 0 |
| 0 | 0 | 0 | 0  | 0 | 0 | 0 |
| 0 | 0 | 0 | 0  | 0 | 0 | 0 |
| 0 | 0 | 0 | 0  | 0 | 0 | 0 |
| 0 | 0 | 0 | 0  | 0 | 0 | 0 |
| 0 | 0 | 0 | 0  | 0 | 0 | 0 |
| 0 | 0 | 0 | 0  | 0 | 0 | 0 |
| 0 | 0 | 0 | 0  | 0 | 0 | 0 |
| 0 | 0 | 0 | 0  | 0 | 0 | 0 |
| 0 | 0 | 0 | 0  | 0 | 0 | 0 |
| 0 | 0 | 0 | 0  | 0 | 0 | 0 |
| 0 | 0 | 0 | 0  | 0 | 0 | 0 |
| 0 | 0 | 0 | 12 | 0 | 0 | 0 |
| 0 | 0 | 0 | 16 | 0 | 0 | 0 |
| 0 | 0 | 0 | 35 | 0 | 0 | 0 |

| UC_333 | UC_340 | UC_341 | UC_342 | UC_348 |
|--------|--------|--------|--------|--------|
| 80     | 0      | 0      | 37     | 0      |
| 14     | 0      | 0      | 0      | 0      |
| 104    | 100    | 0      | 133    | 62     |
| 101    | 112    | 34     | 216    | 284    |
| 25     | 82     | 0      | 210    | 79     |
| 39     | 120    | 0      | 76     | 0      |
| 79     | 10     | 0      | 13     | 0      |
| 0      | 58     | 0      | 39     | 100    |
| 70     | 100    | 12     | 122    | 0      |
| 142    | 296    | 136    | 473    | 130    |
| 0      | 102    | 10     | 47     | 0      |
| 0      | 0      | 0      | 10     | 0      |
| 28     | 27     | 0      | 18     | 27     |
| 31     | 0      | 0      | 0      | 42     |
| 0      | 13     | 19     | 64     | 0      |
| 61     | 38     | 0      | 41     | 0      |
| 1543   | 1600   | 2074   | 3752   | 683    |
| 0      | 89     | 121    | 112    | 195    |
| 44     | 47     | 50     | 50     | 10     |
| 231    | 90     | 48     | 103    | 378    |
| 191    | 0      | 10     | 13     | 57     |
| 283    | 25     | 15     | 33     | 12     |
| 60     | 15     | 0      | 134    | 69     |
| 0      | 0      | 0      | 32     | 0      |
| 1662   | 4178   | 408    | 1979   | 10987  |
| 698    | 1769   | 179    | 559    | 2649   |
| 209    | 1009   | 370    | 432    | 1435   |
| 138    | 751    | 144    | 300    | 954    |
| 336    | 1978   | 311    | 820    | 3468   |
| 57     | 84     | 0      | 104    | 0      |
| 96     | 88     | 23     | 19     | 33     |
| 149    | 171    | 21     | 18     | 0      |
| 1887   | 4206   | 3120   | 1266   | 759    |
| 0      | 13     | 0      | 24     | 0      |
| 36     | 32     | 34     | 60     | 215    |
| 40     | 0      | 41     | 0      | 72     |
| 87     | 33     | 0      | 22     | 44     |
| 828    | 500    | 244    | 918    | 138    |
| 0      | 83     | 232    | 64     | 218    |
| 2658   | 5982   | 4666   | 5235   | 2772   |
| 281    | 225    | 390    | 189    | 12     |

|      |      |      |      |      |
|------|------|------|------|------|
| 140  | 281  | 795  | 246  | 13   |
| 224  | 590  | 577  | 157  | 854  |
| 271  | 384  | 641  | 171  | 568  |
| 282  | 3666 | 1083 | 3383 | 1688 |
| 125  | 191  | 1339 | 399  | 797  |
| 35   | 73   | 14   | 23   | 0    |
| 35   | 147  | 36   | 240  | 0    |
| 0    | 248  | 0    | 108  | 0    |
| 0    | 69   | 14   | 13   | 0    |
| 0    | 103  | 11   | 34   | 0    |
| 0    | 0    | 0    | 0    | 0    |
| 0    | 127  | 14   | 28   | 0    |
| 23   | 436  | 37   | 462  | 0    |
| 0    | 57   | 0    | 0    | 0    |
| 0    | 27   | 0    | 0    | 0    |
| 0    | 274  | 17   | 92   | 0    |
| 0    | 42   | 0    | 13   | 0    |
| 1434 | 1291 | 305  | 1393 | 1759 |
| 67   | 242  | 14   | 169  | 452  |
| 131  | 63   | 0    | 86   | 0    |
| 0    | 40   | 0    | 0    | 104  |
| 10   | 0    | 0    | 0    | 0    |
| 0    | 0    | 0    | 0    | 0    |
| 61   | 45   | 0    | 35   | 0    |
| 10   | 11   | 0    | 0    | 43   |
| 0    | 93   | 0    | 53   | 0    |
| 0    | 34   | 0    | 0    | 0    |
| 0    | 0    | 0    | 0    | 0    |
| 0    | 0    | 0    | 0    | 0    |
| 62   | 138  | 10   | 83   | 0    |
| 59   | 1001 | 149  | 499  | 0    |
| 582  | 2780 | 532  | 2873 | 229  |
| 61   | 95   | 10   | 60   | 0    |
| 33   | 101  | 11   | 0    | 0    |
| 0    | 51   | 0    | 25   | 0    |
| 0    | 56   | 0    | 83   | 0    |
| 0    | 77   | 0    | 17   | 0    |
| 23   | 214  | 13   | 14   | 0    |
| 96   | 75   | 0    | 14   | 0    |
| 0    | 63   | 0    | 11   | 0    |
| 21   | 565  | 129  | 113  | 0    |
| 31   | 114  | 0    | 30   | 0    |
| 10   | 28   | 0    | 39   | 0    |
| 0    | 12   | 0    | 0    | 0    |
| 12   | 533  | 127  | 181  | 0    |
| 561  | 3546 | 620  | 1941 | 103  |

|      |      |      |      |       |
|------|------|------|------|-------|
| 10   | 63   | 57   | 25   | 74    |
| 132  | 410  | 100  | 354  | 148   |
| 0    | 108  | 10   | 302  | 0     |
| 0    | 69   | 0    | 0    | 0     |
| 109  | 2898 | 383  | 3690 | 29    |
| 30   | 25   | 13   | 242  | 0     |
| 39   | 0    | 0    | 0    | 0     |
| 20   | 25   | 0    | 23   | 0     |
| 0    | 16   | 0    | 0    | 0     |
| 35   | 33   | 0    | 75   | 0     |
| 257  | 160  | 62   | 169  | 37    |
| 42   | 136  | 11   | 0    | 0     |
| 8190 | 9562 | 1193 | 9400 | 3561  |
| 0    | 48   | 0    | 65   | 10    |
| 725  | 1083 | 153  | 1788 | 168   |
| 0    | 168  | 31   | 74   | 88    |
| 104  | 107  | 0    | 46   | 164   |
| 44   | 239  | 39   | 59   | 0     |
| 69   | 150  | 0    | 158  | 0     |
| 0    | 110  | 0    | 32   | 0     |
| 0    | 0    | 0    | 0    | 0     |
| 0    | 32   | 0    | 24   | 0     |
| 0    | 53   | 0    | 40   | 31    |
| 515  | 447  | 45   | 86   | 72    |
| 792  | 983  | 237  | 730  | 353   |
| 878  | 854  | 69   | 229  | 111   |
| 477  | 485  | 18   | 127  | 94    |
| 21   | 87   | 0    | 10   | 510   |
| 83   | 223  | 31   | 158  | 448   |
| 1108 | 1517 | 507  | 1908 | 918   |
| 49   | 117  | 0    | 201  | 79    |
| 50   | 46   | 0    | 15   | 0     |
| 50   | 58   | 33   | 97   | 43    |
| 36   | 79   | 111  | 416  | 310   |
| 0    | 16   | 0    | 19   | 0     |
| 52   | 71   | 0    | 30   | 0     |
| 179  | 182  | 26   | 64   | 0     |
| 218  | 181  | 39   | 165  | 32    |
| 39   | 142  | 0    | 0    | 0     |
| 1870 | 1810 | 193  | 527  | 221   |
| 85   | 115  | 0    | 46   | 27    |
| 55   | 69   | 12   | 43   | 13    |
| 55   | 234  | 0    | 150  | 182   |
| 1956 | 6096 | 1636 | 7534 | 21777 |
| 43   | 228  | 11   | 86   | 1398  |
| 661  | 1521 | 711  | 1060 | 14403 |

|     |      |     |      |     |
|-----|------|-----|------|-----|
| 41  | 0    | 0   | 23   | 0   |
| 401 | 392  | 20  | 79   | 87  |
| 594 | 568  | 110 | 377  | 203 |
| 571 | 2077 | 523 | 4531 | 105 |
| 0   | 90   | 0   | 44   | 0   |
| 115 | 263  | 59  | 347  | 29  |
| 0   | 0    | 0   | 0    | 0   |
| 43  | 106  | 28  | 28   | 0   |
| 0   | 31   | 0   | 0    | 0   |
| 0   | 0    | 0   | 0    | 0   |
| 133 | 259  | 41  | 346  | 67  |
| 207 | 120  | 10  | 126  | 112 |
| 0   | 99   | 27  | 77   | 0   |
| 195 | 313  | 16  | 16   | 48  |
| 545 | 809  | 118 | 324  | 146 |
| 0   | 60   | 0   | 62   | 0   |
| 0   | 155  | 0   | 124  | 31  |
| 0   | 0    | 0   | 56   | 0   |
| 0   | 0    | 0   | 0    | 0   |
| 43  | 10   | 0   | 51   | 13  |
| 181 | 207  | 62  | 299  | 29  |
| 0   | 11   | 0   | 25   | 0   |
| 400 | 564  | 89  | 581  | 90  |
| 26  | 104  | 0   | 27   | 0   |
| 184 | 94   | 13  | 103  | 20  |
| 103 | 477  | 90  | 666  | 341 |
| 167 | 142  | 62  | 397  | 52  |
| 550 | 491  | 306 | 1724 | 631 |
| 55  | 72   | 22  | 141  | 23  |
| 31  | 71   | 15  | 295  | 10  |
| 10  | 47   | 0   | 0    | 0   |
| 72  | 114  | 15  | 249  | 270 |
| 251 | 412  | 42  | 174  | 131 |
| 12  | 100  | 33  | 228  | 0   |
| 183 | 140  | 27  | 299  | 137 |
| 108 | 446  | 74  | 340  | 578 |
| 0   | 237  | 129 | 84   | 0   |
| 0   | 0    | 0   | 12   | 0   |
| 12  | 15   | 0   | 73   | 0   |
| 0   | 0    | 0   | 0    | 0   |
| 341 | 216  | 0   | 0    | 15  |
| 0   | 0    | 0   | 0    | 0   |
| 0   | 100  | 51  | 66   | 0   |
| 0   | 0    | 0   | 0    | 0   |
| 20  | 141  | 22  | 320  | 115 |
| 64  | 31   | 201 | 520  | 242 |

|      |      |      |      |       |
|------|------|------|------|-------|
| 85   | 0    | 175  | 258  | 590   |
| 40   | 19   | 104  | 733  | 153   |
| 297  | 937  | 769  | 2728 | 7947  |
| 573  | 127  | 1123 | 2709 | 2606  |
| 0    | 84   | 0    | 167  | 10    |
| 223  | 352  | 95   | 953  | 223   |
| 439  | 464  | 156  | 1260 | 71    |
| 23   | 28   | 0    | 69   | 0     |
| 18   | 15   | 0    | 49   | 27    |
| 0    | 0    | 0    | 0    | 0     |
| 0    | 20   | 0    | 13   | 12    |
| 0    | 0    | 0    | 10   | 0     |
| 0    | 38   | 0    | 64   | 127   |
| 476  | 934  | 540  | 2438 | 1144  |
| 0    | 0    | 23   | 116  | 156   |
| 33   | 912  | 150  | 1819 | 0     |
| 30   | 0    | 0    | 0    | 10    |
| 0    | 0    | 0    | 0    | 52    |
| 0    | 0    | 0    | 0    | 0     |
| 0    | 0    | 0    | 0    | 0     |
| 0    | 0    | 0    | 0    | 0     |
| 1853 | 404  | 476  | 1770 | 10958 |
| 0    | 10   | 15   | 12   | 23    |
| 0    | 58   | 17   | 224  | 0     |
| 0    | 35   | 26   | 30   | 238   |
| 0    | 75   | 19   | 103  | 73    |
| 285  | 85   | 46   | 186  | 206   |
| 0    | 0    | 0    | 62   | 0     |
| 0    | 37   | 0    | 0    | 0     |
| 0    | 0    | 0    | 0    | 0     |
| 0    | 0    | 0    | 0    | 0     |
| 0    | 24   | 0    | 41   | 0     |
| 0    | 0    | 11   | 0    | 0     |
| 0    | 0    | 0    | 0    | 0     |
| 15   | 0    | 0    | 0    | 0     |
| 95   | 140  | 0    | 152  | 49    |
| 4921 | 3809 | 1086 | 4835 | 4334  |
| 2753 | 2405 | 631  | 2306 | 2302  |
| 311  | 60   | 41   | 80   | 118   |
| 0    | 0    | 0    | 0    | 53    |
| 0    | 0    | 0    | 0    | 81    |
| 276  | 618  | 110  | 607  | 23    |
| 444  | 360  | 22   | 218  | 23    |
| 57   | 91   | 16   | 117  | 0     |
| 0    | 44   | 25   | 10   | 0     |
| 26   | 534  | 147  | 810  | 14    |

|      |      |     |      |      |
|------|------|-----|------|------|
| 0    | 167  | 50  | 355  | 0    |
| 25   | 398  | 50  | 258  | 12   |
| 274  | 114  | 67  | 112  | 1284 |
| 101  | 55   | 0   | 42   | 0    |
| 235  | 172  | 43  | 165  | 23   |
| 2319 | 2412 | 579 | 2089 | 1663 |
| 217  | 276  | 76  | 733  | 364  |
| 110  | 84   | 0   | 368  | 0    |
| 0    | 29   | 0   | 22   | 11   |
| 0    | 0    | 0   | 0    | 0    |
| 0    | 113  | 0   | 37   | 0    |
| 0    | 22   | 0   | 0    | 0    |
| 0    | 11   | 11  | 97   | 0    |
| 739  | 792  | 134 | 762  | 439  |
| 0    | 0    | 0   | 77   | 38   |
| 65   | 0    | 0   | 0    | 0    |
| 0    | 0    | 0   | 29   | 0    |
| 0    | 11   | 0   | 112  | 0    |
| 354  | 519  | 118 | 327  | 443  |
| 29   | 10   | 0   | 0    | 481  |
| 79   | 0    | 0   | 0    | 0    |
| 127  | 0    | 0   | 0    | 0    |
| 346  | 483  | 56  | 75   | 57   |
| 61   | 0    | 32  | 15   | 0    |
| 2349 | 1297 | 846 | 1517 | 3353 |
| 167  | 81   | 106 | 169  | 96   |
| 0    | 0    | 0   | 93   | 0    |
| 312  | 334  | 201 | 1310 | 336  |
| 632  | 412  | 99  | 449  | 43   |
| 234  | 120  | 33  | 103  | 36   |
| 0    | 42   | 14  | 83   | 276  |
| 179  | 68   | 53  | 234  | 22   |
| 0    | 0    | 0   | 0    | 0    |
| 102  | 18   | 29  | 72   | 0    |
| 465  | 280  | 360 | 1004 | 1996 |
| 88   | 47   | 51  | 123  | 236  |
| 120  | 111  | 105 | 244  | 243  |
| 80   | 0    | 0   | 55   | 0    |
| 0    | 0    | 0   | 0    | 0    |
| 296  | 394  | 38  | 639  | 56   |
| 174  | 276  | 57  | 762  | 47   |
| 124  | 190  | 16  | 150  | 53   |
| 10   | 58   | 0   | 0    | 0    |
| 1192 | 1110 | 156 | 332  | 110  |
| 0    | 0    | 0   | 0    | 0    |
| 2130 | 3592 | 160 | 1359 | 358  |



|      |      |       |       |       |
|------|------|-------|-------|-------|
| 5780 | 4060 | 252   | 2527  | 623   |
| 83   | 141  | 0     | 0     | 0     |
| 334  | 100  | 18    | 50    | 0     |
| 695  | 1638 | 43    | 479   | 966   |
| 386  | 870  | 13    | 329   | 21    |
| 254  | 285  | 0     | 196   | 54    |
| 93   | 160  | 28    | 129   | 11    |
| 1247 | 944  | 16    | 212   | 160   |
| 107  | 114  | 0     | 0     | 0     |
| 23   | 41   | 0     | 0     | 0     |
| 1052 | 0    | 0     | 0     | 0     |
| 487  | 364  | 48    | 454   | 161   |
| 4985 | 3227 | 627   | 4116  | 1033  |
| 759  | 493  | 69    | 398   | 64    |
| 533  | 111  | 62    | 305   | 52    |
| 598  | 348  | 217   | 440   | 214   |
| 2583 | 958  | 606   | 1530  | 438   |
| 72   | 141  | 45    | 24    | 89    |
| 28   | 129  | 22    | 56    | 114   |
| 172  | 260  | 70    | 121   | 281   |
| 48   | 115  | 0     | 33    | 0     |
| 68   | 227  | 98    | 105   | 302   |
| 204  | 1376 | 382   | 463   | 629   |
| 50   | 389  | 64    | 105   | 2603  |
| 13   | 416  | 65    | 107   | 1839  |
| 225  | 193  | 96    | 63    | 34    |
| 2818 | 8661 | 16468 | 11350 | 15512 |
| 152  | 1272 | 3087  | 425   | 1385  |
| 112  | 143  | 428   | 392   | 812   |
| 98   | 338  | 1085  | 766   | 61    |
| 4536 | 1370 | 2917  | 6084  | 1016  |
| 57   | 1594 | 4002  | 4885  | 254   |
| 45   | 853  | 2602  | 325   | 3784  |
| 68   | 0    | 0     | 0     | 0     |
| 79   | 1570 | 1904  | 2276  | 95    |
| 837  | 958  | 40    | 691   | 2522  |
| 56   | 197  | 0     | 41    | 507   |
| 426  | 2506 | 1162  | 1242  | 2705  |
| 563  | 1157 | 109   | 880   | 5043  |
| 446  | 2393 | 441   | 297   | 1889  |
| 1506 | 2196 | 90    | 347   | 229   |
| 1559 | 2784 | 170   | 212   | 311   |
| 19   | 178  | 48    | 259   | 35    |
| 159  | 211  | 118   | 243   | 116   |
| 590  | 149  | 0     | 140   | 152   |
| 53   | 41   | 0     | 16    | 48    |

|      |      |     |      |      |
|------|------|-----|------|------|
| 1071 | 1513 | 270 | 2420 | 868  |
| 142  | 215  | 45  | 156  | 97   |
| 501  | 320  | 36  | 82   | 0    |
| 384  | 380  | 162 | 222  | 86   |
| 12   | 11   | 0   | 11   | 23   |
| 10   | 0    | 0   | 38   | 0    |
| 90   | 285  | 15  | 806  | 443  |
| 33   | 113  | 39  | 79   | 17   |
| 96   | 74   | 0   | 87   | 450  |
| 62   | 10   | 0   | 34   | 312  |
| 0    | 47   | 0   | 41   | 38   |
| 606  | 691  | 142 | 1037 | 1847 |
| 0    | 11   | 0   | 0    | 298  |
| 63   | 74   | 0   | 11   | 0    |
| 10   | 0    | 0   | 0    | 0    |
| 0    | 0    | 0   | 0    | 0    |
| 0    | 10   | 0   | 40   | 268  |
| 22   | 13   | 0   | 169  | 0    |
| 693  | 940  | 184 | 1321 | 257  |
| 0    | 0    | 0   | 85   | 0    |
| 0    | 0    | 0   | 21   | 0    |
| 0    | 0    | 0   | 124  | 0    |
| 0    | 0    | 0   | 0    | 0    |
| 501  | 793  | 179 | 645  | 129  |
| 0    | 0    | 0   | 0    | 0    |
| 14   | 51   | 0   | 41   | 0    |
| 67   | 16   | 0   | 12   | 25   |
| 59   | 41   | 12  | 44   | 11   |
| 0    | 0    | 0   | 10   | 0    |
| 0    | 11   | 0   | 12   | 0    |
| 0    | 0    | 0   | 0    | 0    |
| 0    | 0    | 0   | 0    | 0    |
| 0    | 0    | 0   | 0    | 0    |
| 0    | 43   | 0   | 0    | 0    |
| 135  | 120  | 67  | 156  | 297  |
| 0    | 0    | 0   | 0    | 0    |
| 0    | 0    | 0   | 0    | 0    |
| 0    | 0    | 0   | 0    | 0    |
| 0    | 0    | 0   | 0    | 0    |
| 11   | 17   | 0   | 52   | 0    |
| 0    | 13   | 0   | 0    | 0    |
| 116  | 169  | 23  | 89   | 0    |
| 62   | 107  | 34  | 166  | 0    |
| 63   | 109  | 33  | 149  | 13   |
| 0    | 0    | 0   | 0    | 0    |
| 0    | 0    | 0   | 0    | 0    |

|      |      |     |      |      |
|------|------|-----|------|------|
| 98   | 104  | 57  | 141  | 221  |
| 0    | 0    | 0   | 0    | 0    |
| 0    | 0    | 0   | 26   | 26   |
| 2218 | 2479 | 519 | 3875 | 477  |
| 34   | 28   | 0   | 109  | 0    |
| 10   | 25   | 0   | 108  | 0    |
| 88   | 42   | 48  | 187  | 207  |
| 81   | 63   | 37  | 282  | 133  |
| 0    | 13   | 17  | 121  | 164  |
| 86   | 43   | 27  | 14   | 0    |
| 112  | 68   | 20  | 296  | 346  |
| 274  | 377  | 178 | 942  | 640  |
| 107  | 283  | 183 | 645  | 1266 |
| 236  | 525  | 277 | 1217 | 508  |
| 55   | 53   | 37  | 85   | 294  |
| 0    | 0    | 0   | 0    | 0    |
| 0    | 0    | 0   | 0    | 0    |
| 37   | 88   | 75  | 62   | 123  |
| 0    | 0    | 0   | 0    | 0    |
| 0    | 0    | 0   | 0    | 11   |
| 67   | 111  | 33  | 161  | 22   |
| 0    | 0    | 0   | 0    | 0    |
| 69   | 93   | 16  | 241  | 100  |
| 101  | 402  | 191 | 616  | 451  |
| 0    | 0    | 0   | 0    | 0    |
| 0    | 0    | 0   | 0    | 0    |
| 116  | 71   | 0   | 66   | 45   |
| 0    | 0    | 0   | 0    | 0    |
| 1073 | 1298 | 250 | 1186 | 211  |
| 38   | 66   | 0   | 30   | 0    |
| 31   | 69   | 0   | 0    | 13   |
| 150  | 209  | 46  | 25   | 45   |
| 101  | 93   | 0   | 73   | 12   |
| 0    | 0    | 0   | 27   | 0    |
| 0    | 0    | 0   | 0    | 0    |
| 0    | 0    | 0   | 0    | 0    |
| 0    | 0    | 0   | 0    | 0    |
| 470  | 470  | 380 | 665  | 1155 |
| 0    | 0    | 0   | 0    | 0    |
| 52   | 88   | 49  | 25   | 388  |
| 45   | 145  | 61  | 68   | 1091 |
| 34   | 0    | 0   | 20   | 74   |
| 0    | 0    | 0   | 10   | 0    |
| 26   | 13   | 0   | 0    | 22   |
| 0    | 0    | 0   | 0    | 0    |
| 0    | 0    | 0   | 0    | 13   |

|      |      |      |      |      |
|------|------|------|------|------|
| 401  | 24   | 23   | 47   | 24   |
| 31   | 0    | 11   | 79   | 0    |
| 0    | 0    | 0    | 0    | 11   |
| 0    | 0    | 0    | 0    | 0    |
| 0    | 0    | 0    | 0    | 0    |
| 0    | 0    | 0    | 34   | 0    |
| 0    | 0    | 0    | 0    | 135  |
| 78   | 10   | 0    | 44   | 0    |
| 2582 | 2117 | 620  | 4510 | 1363 |
| 94   | 125  | 36   | 170  | 126  |
| 85   | 22   | 0    | 84   | 27   |
| 932  | 1014 | 310  | 1399 | 256  |
| 0    | 0    | 0    | 12   | 0    |
| 0    | 0    | 0    | 41   | 0    |
| 97   | 119  | 0    | 119  | 0    |
| 2619 | 2204 | 613  | 1427 | 540  |
| 105  | 104  | 0    | 130  | 0    |
| 0    | 0    | 0    | 0    | 0    |
| 10   | 14   | 0    | 40   | 40   |
| 0    | 0    | 0    | 0    | 0    |
| 0    | 0    | 0    | 0    | 0    |
| 12   | 14   | 0    | 60   | 21   |
| 0    | 15   | 0    | 95   | 0    |
| 134  | 254  | 33   | 401  | 87   |
| 265  | 453  | 439  | 426  | 341  |
| 1554 | 1542 | 699  | 1788 | 927  |
| 142  | 152  | 38   | 237  | 194  |
| 154  | 79   | 12   | 44   | 74   |
| 195  | 341  | 130  | 165  | 486  |
| 25   | 30   | 0    | 0    | 36   |
| 0    | 0    | 0    | 0    | 0    |
| 0    | 0    | 0    | 0    | 0    |
| 52   | 89   | 24   | 11   | 34   |
| 40   | 55   | 0    | 73   | 15   |
| 224  | 158  | 64   | 319  | 68   |
| 117  | 58   | 0    | 27   | 63   |
| 0    | 280  | 133  | 117  | 62   |
| 835  | 8097 | 2667 | 7077 | 1716 |
| 45   | 259  | 378  | 437  | 810  |
| 0    | 0    | 0    | 0    | 0    |
| 12   | 1049 | 271  | 980  | 0    |
| 0    | 19   | 0    | 14   | 0    |
| 0    | 50   | 0    | 64   | 0    |
| 0    | 95   | 15   | 0    | 0    |
| 25   | 0    | 0    | 0    | 0    |
| 97   | 246  | 648  | 166  | 116  |

|       |       |      |       |      |
|-------|-------|------|-------|------|
| 0     | 118   | 0    | 65    | 0    |
| 0     | 56    | 0    | 24    | 0    |
| 0     | 0     | 0    | 0     | 0    |
| 86    | 944   | 320  | 252   | 48   |
| 41    | 51    | 12   | 102   | 0    |
| 153   | 156   | 48   | 55    | 279  |
| 199   | 232   | 53   | 160   | 105  |
| 59    | 110   | 22   | 128   | 175  |
| 67    | 66    | 0    | 182   | 39   |
| 0     | 20    | 0    | 33    | 40   |
| 551   | 831   | 228  | 928   | 969  |
| 0     | 121   | 21   | 76    | 0    |
| 12    | 40    | 0    | 36    | 0    |
| 34    | 125   | 10   | 48    | 0    |
| 93    | 10    | 0    | 0     | 26   |
| 0     | 0     | 0    | 0     | 0    |
| 0     | 0     | 0    | 0     | 0    |
| 0     | 0     | 0    | 28    | 0    |
| 232   | 318   | 29   | 441   | 90   |
| 0     | 24    | 0    | 10    | 0    |
| 201   | 73    | 20   | 146   | 102  |
| 0     | 0     | 0    | 0     | 0    |
| 81    | 183   | 28   | 237   | 0    |
| 0     | 83    | 0    | 57    | 0    |
| 142   | 406   | 59   | 375   | 0    |
| 0     | 15    | 0    | 15    | 0    |
| 0     | 10    | 0    | 24    | 10   |
| 43    | 86    | 14   | 141   | 0    |
| 0     | 0     | 0    | 10    | 28   |
| 0     | 0     | 0    | 0     | 0    |
| 0     | 12    | 0    | 31    | 0    |
| 0     | 0     | 0    | 0     | 0    |
| 0     | 0     | 0    | 0     | 0    |
| 30    | 25    | 0    | 46    | 0    |
| 0     | 0     | 0    | 0     | 0    |
| 0     | 0     | 0    | 0     | 0    |
| 13    | 119   | 14   | 293   | 0    |
| 119   | 164   | 14   | 175   | 374  |
| 10781 | 12351 | 2052 | 12896 | 2194 |
| 0     | 60    | 0    | 42    | 0    |
| 0     | 0     | 0    | 0     | 0    |
| 0     | 0     | 0    | 0     | 0    |
| 42    | 80    | 22   | 198   | 327  |
| 13    | 10    | 62   | 25    | 127  |
| 0     | 0     | 0    | 29    | 0    |
| 0     | 0     | 0    | 0     | 0    |

|       |      |      |      |      |
|-------|------|------|------|------|
| 0     | 0    | 0    | 11   | 0    |
| 118   | 162  | 16   | 158  | 35   |
| 0     | 0    | 0    | 0    | 23   |
| 0     | 25   | 0    | 10   | 0    |
| 0     | 0    | 0    | 58   | 0    |
| 36    | 49   | 10   | 105  | 0    |
| 0     | 0    | 0    | 21   | 16   |
| 0     | 10   | 0    | 48   | 0    |
| 0     | 0    | 0    | 0    | 0    |
| 11    | 10   | 0    | 56   | 10   |
| 0     | 0    | 0    | 0    | 0    |
| 111   | 217  | 28   | 28   | 0    |
| 12195 | 8892 | 2483 | 3830 | 1908 |
| 1255  | 1134 | 159  | 484  | 535  |
| 0     | 119  | 0    | 74   | 0    |
| 0     | 0    | 0    | 0    | 0    |
| 0     | 0    | 0    | 0    | 0    |
| 0     | 30   | 0    | 0    | 0    |
| 642   | 284  | 83   | 48   | 41   |
| 3698  | 2603 | 463  | 1732 | 421  |
| 1473  | 1244 | 216  | 594  | 303  |
| 190   | 186  | 43   | 278  | 11   |
| 43    | 95   | 24   | 122  | 147  |
| 0     | 0    | 0    | 0    | 0    |
| 37    | 0    | 0    | 32   | 0    |
| 0     | 0    | 0    | 0    | 0    |
| 0     | 18   | 0    | 56   | 0    |
| 1044  | 1013 | 190  | 584  | 178  |
| 0     | 21   | 0    | 10   | 61   |
| 10    | 0    | 0    | 39   | 0    |
| 0     | 0    | 0    | 14   | 0    |
| 0     | 0    | 0    | 0    | 0    |
| 1506  | 1629 | 75   | 262  | 212  |
| 18    | 10   | 37   | 100  | 0    |
| 46    | 48   | 44   | 101  | 0    |
| 0     | 0    | 0    | 0    | 0    |
| 618   | 770  | 11   | 0    | 123  |
| 161   | 253  | 18   | 0    | 55   |
| 517   | 612  | 160  | 36   | 761  |
| 1178  | 1532 | 125  | 37   | 135  |
| 100   | 36   | 12   | 72   | 0    |
| 0     | 18   | 0    | 89   | 15   |
| 0     | 62   | 0    | 21   | 0    |
| 1632  | 1394 | 367  | 1867 | 754  |
| 91    | 74   | 0    | 46   | 0    |
| 0     | 0    | 0    | 36   | 0    |

|      |      |     |      |      |
|------|------|-----|------|------|
| 0    | 0    | 0   | 0    | 0    |
| 22   | 0    | 0   | 24   | 0    |
| 0    | 0    | 0   | 0    | 0    |
| 198  | 142  | 0   | 290  | 0    |
| 626  | 362  | 28  | 498  | 128  |
| 724  | 472  | 87  | 793  | 507  |
| 684  | 399  | 32  | 308  | 59   |
| 25   | 68   | 0   | 211  | 14   |
| 139  | 177  | 21  | 246  | 425  |
| 0    | 34   | 0   | 141  | 0    |
| 31   | 17   | 13  | 28   | 0    |
| 0    | 86   | 0   | 33   | 0    |
| 0    | 15   | 0   | 0    | 0    |
| 0    | 0    | 0   | 0    | 0    |
| 0    | 0    | 0   | 0    | 0    |
| 0    | 0    | 0   | 0    | 0    |
| 0    | 0    | 0   | 30   | 0    |
| 25   | 93   | 0   | 43   | 0    |
| 0    | 0    | 0   | 0    | 0    |
| 54   | 60   | 101 | 24   | 0    |
| 647  | 616  | 12  | 373  | 58   |
| 0    | 0    | 0   | 0    | 0    |
| 4531 | 3808 | 487 | 988  | 427  |
| 18   | 17   | 0   | 15   | 0    |
| 3524 | 2794 | 240 | 1770 | 229  |
| 0    | 0    | 0   | 12   | 0    |
| 261  | 381  | 36  | 79   | 28   |
| 1271 | 931  | 70  | 783  | 34   |
| 0    | 0    | 0   | 0    | 0    |
| 0    | 0    | 0   | 33   | 0    |
| 0    | 0    | 0   | 0    | 0    |
| 985  | 0    | 0   | 0    | 4053 |
| 179  | 0    | 12  | 0    | 2694 |
| 87   | 51   | 0   | 0    | 0    |
| 67   | 70   | 20  | 34   | 109  |
| 0    | 23   | 0   | 0    | 0    |
| 55   | 62   | 0   | 38   | 138  |
| 0    | 0    | 0   | 10   | 0    |
| 27   | 0    | 0   | 93   | 0    |
| 24   | 12   | 0   | 0    | 182  |
| 12   | 36   | 24  | 232  | 72   |
| 346  | 281  | 19  | 378  | 506  |
| 1148 | 225  | 144 | 228  | 2376 |
| 76   | 31   | 34  | 0    | 0    |
| 236  | 82   | 38  | 0    | 262  |
| 0    | 0    | 58  | 22   | 18   |

|       |       |      |       |       |
|-------|-------|------|-------|-------|
| 0     | 150   | 0    | 0     | 13    |
| 715   | 1659  | 218  | 238   | 238   |
| 222   | 527   | 0    | 35    | 0     |
| 114   | 72    | 78   | 226   | 148   |
| 32    | 12    | 13   | 14    | 167   |
| 103   | 365   | 117  | 801   | 127   |
| 16    | 319   | 189  | 1879  | 916   |
| 91    | 126   | 0    | 155   | 36    |
| 15001 | 6972  | 2636 | 12586 | 7705  |
| 10085 | 9166  | 761  | 2459  | 516   |
| 5259  | 3731  | 205  | 1389  | 195   |
| 149   | 91    | 110  | 308   | 169   |
| 0     | 0     | 0    | 0     | 0     |
| 66    | 0     | 69   | 51    | 729   |
| 0     | 0     | 21   | 242   | 0     |
| 145   | 26    | 121  | 134   | 179   |
| 74    | 35    | 0    | 0     | 0     |
| 47    | 0     | 0    | 16    | 0     |
| 11    | 0     | 11   | 52    | 0     |
| 0     | 10    | 0    | 0     | 0     |
| 385   | 69    | 70   | 282   | 362   |
| 246   | 444   | 125  | 305   | 355   |
| 109   | 14    | 0    | 127   | 0     |
| 703   | 0     | 0    | 54    | 0     |
| 0     | 0     | 0    | 0     | 0     |
| 619   | 310   | 15   | 141   | 128   |
| 4440  | 7133  | 2822 | 4467  | 1475  |
| 2007  | 1550  | 468  | 2020  | 2145  |
| 14089 | 18082 | 8440 | 21198 | 35837 |
| 96    | 372   | 148  | 191   | 38    |
| 186   | 276   | 147  | 331   | 138   |
| 105   | 340   | 34   | 465   | 10    |
| 3253  | 2824  | 1195 | 3264  | 1803  |
| 1286  | 1318  | 523  | 2644  | 1215  |
| 171   | 248   | 70   | 94    | 11    |
| 0     | 63    | 0    | 71    | 37    |
| 2380  | 1852  | 1552 | 2898  | 6029  |
| 2418  | 1268  | 687  | 2405  | 5159  |
| 1672  | 885   | 1222 | 1559  | 2629  |
| 1220  | 1194  | 2434 | 4971  | 1623  |
| 0     | 49    | 89   | 459   | 13    |
| 0     | 0     | 10   | 77    | 22    |
| 2078  | 1922  | 5165 | 4369  | 11199 |
| 124   | 66    | 92   | 59    | 581   |
| 0     | 58    | 0    | 234   | 0     |
| 2008  | 1866  | 1437 | 1610  | 3495  |



|       |       |      |      |      |
|-------|-------|------|------|------|
| 747   | 630   | 100  | 162  | 1520 |
| 36490 | 27414 | 3183 | 9335 | 9240 |
| 23    | 60    | 0    | 108  | 0    |
| 1403  | 1034  | 313  | 721  | 451  |
| 268   | 557   | 132  | 43   | 1320 |
| 308   | 223   | 12   | 0    | 15   |
| 2009  | 2409  | 379  | 775  | 2597 |
| 1029  | 620   | 34   | 46   | 91   |
| 0     | 13    | 0    | 0    | 0    |
| 25    | 193   | 41   | 124  | 61   |
| 264   | 1582  | 279  | 447  | 1120 |
| 131   | 359   | 102  | 136  | 353  |
| 0     | 0     | 0    | 26   | 0    |
| 0     | 0     | 0    | 0    | 0    |
| 448   | 51    | 0    | 477  | 375  |
| 958   | 929   | 666  | 1985 | 968  |
| 236   | 273   | 359  | 474  | 1729 |
| 104   | 238   | 251  | 323  | 256  |
| 170   | 50    | 148  | 108  | 187  |
| 0     | 37    | 143  | 30   | 638  |
| 261   | 246   | 393  | 160  | 1583 |
| 0     | 0     | 0    | 0    | 0    |
| 0     | 0     | 0    | 0    | 0    |
| 77    | 30    | 0    | 90   | 0    |
| 552   | 303   | 127  | 10   | 208  |
| 0     | 0     | 12   | 0    | 0    |
| 0     | 0     | 0    | 0    | 0    |
| 0     | 0     | 0    | 0    | 0    |
| 10    | 0     | 0    | 0    | 0    |
| 143   | 0     | 10   | 328  | 163  |
| 163   | 0     | 0    | 23   | 0    |
| 38    | 0     | 0    | 0    | 0    |
| 942   | 14    | 118  | 110  | 74   |
| 1129  | 493   | 115  | 254  | 116  |
| 80    | 62    | 100  | 142  | 75   |
| 109   | 91    | 37   | 246  | 0    |
| 148   | 103   | 93   | 154  | 413  |
| 11    | 0     | 0    | 84   | 70   |
| 838   | 377   | 140  | 329  | 395  |
| 105   | 84    | 35   | 532  | 0    |
| 52    | 53    | 0    | 198  | 0    |
| 45    | 282   | 114  | 877  | 0    |
| 0     | 0     | 0    | 0    | 0    |
| 47    | 276   | 136  | 208  | 0    |
| 24    | 0     | 0    | 22   | 0    |
| 19    | 291   | 131  | 219  | 0    |

|     |      |      |     |      |
|-----|------|------|-----|------|
| 0   | 0    | 0    | 11  | 0    |
| 0   | 217  | 0    | 0   | 136  |
| 139 | 129  | 17   | 216 | 53   |
| 35  | 0    | 46   | 0   | 40   |
| 459 | 57   | 0    | 21  | 16   |
| 0   | 12   | 0    | 0   | 0    |
| 0   | 0    | 0    | 0   | 0    |
| 0   | 0    | 0    | 0   | 0    |
| 11  | 0    | 0    | 0   | 0    |
| 69  | 138  | 116  | 92  | 164  |
| 11  | 59   | 0    | 0   | 0    |
| 180 | 107  | 10   | 204 | 0    |
| 224 | 185  | 206  | 248 | 68   |
| 0   | 35   | 265  | 156 | 34   |
| 59  | 200  | 1637 | 308 | 399  |
| 121 | 79   | 51   | 144 | 36   |
| 0   | 36   | 154  | 51  | 26   |
| 213 | 265  | 105  | 102 | 55   |
| 255 | 41   | 13   | 57  | 26   |
| 103 | 0    | 12   | 0   | 0    |
| 341 | 1269 | 146  | 125 | 2234 |
| 39  | 172  | 74   | 31  | 217  |
| 56  | 30   | 0    | 0   | 140  |
| 0   | 0    | 0    | 0   | 0    |
| 198 | 129  | 21   | 10  | 57   |
| 36  | 55   | 0    | 11  | 0    |
| 0   | 0    | 0    | 0   | 0    |
| 129 | 62   | 10   | 94  | 0    |
| 0   | 175  | 0    | 260 | 0    |
| 100 | 0    | 0    | 16  | 0    |
| 0   | 0    | 0    | 0   | 11   |
| 0   | 0    | 0    | 0   | 0    |
| 0   | 37   | 0    | 0   | 0    |
| 0   | 12   | 0    | 0   | 108  |
| 11  | 42   | 0    | 0   | 12   |
| 0   | 11   | 0    | 0   | 0    |
| 0   | 0    | 0    | 0   | 0    |
| 0   | 0    | 0    | 0   | 0    |
| 0   | 0    | 0    | 0   | 0    |
| 47  | 0    | 0    | 0   | 0    |
| 0   | 0    | 0    | 0   | 0    |
| 72  | 0    | 0    | 0   | 0    |
| 0   | 0    | 0    | 0   | 0    |
| 14  | 32   | 30   | 32  | 0    |
| 30  | 124  | 0    | 0   | 0    |
| 81  | 55   | 0    | 80  | 15   |

|     |     |      |     |      |
|-----|-----|------|-----|------|
| 56  | 0   | 0    | 37  | 0    |
| 20  | 12  | 0    | 0   | 0    |
| 10  | 0   | 0    | 32  | 0    |
| 97  | 73  | 10   | 11  | 282  |
| 10  | 39  | 0    | 0   | 0    |
| 0   | 0   | 0    | 0   | 0    |
| 72  | 169 | 0    | 205 | 47   |
| 0   | 0   | 0    | 16  | 0    |
| 14  | 28  | 0    | 40  | 0    |
| 27  | 70  | 0    | 21  | 386  |
| 10  | 37  | 0    | 0   | 70   |
| 0   | 0   | 0    | 0   | 0    |
| 84  | 47  | 67   | 82  | 170  |
| 50  | 0   | 0    | 60  | 0    |
| 40  | 10  | 0    | 84  | 0    |
| 0   | 34  | 0    | 31  | 0    |
| 67  | 36  | 0    | 37  | 0    |
| 29  | 63  | 0    | 12  | 0    |
| 63  | 291 | 109  | 177 | 3044 |
| 72  | 26  | 0    | 134 | 0    |
| 0   | 31  | 0    | 119 | 0    |
| 0   | 40  | 0    | 29  | 0    |
| 204 | 0   | 12   | 26  | 0    |
| 90  | 93  | 13   | 49  | 0    |
| 0   | 10  | 0    | 0   | 0    |
| 20  | 40  | 0    | 14  | 0    |
| 190 | 11  | 26   | 0   | 89   |
| 134 | 10  | 10   | 0   | 0    |
| 0   | 0   | 0    | 0   | 0    |
| 25  | 0   | 0    | 0   | 0    |
| 20  | 0   | 0    | 0   | 26   |
| 0   | 11  | 0    | 18  | 0    |
| 36  | 77  | 0    | 53  | 0    |
| 60  | 138 | 0    | 162 | 36   |
| 0   | 0   | 0    | 0   | 0    |
| 0   | 38  | 72   | 210 | 99   |
| 0   | 0   | 0    | 0   | 0    |
| 14  | 0   | 0    | 185 | 0    |
| 0   | 0   | 0    | 0   | 0    |
| 38  | 0   | 0    | 13  | 0    |
| 0   | 515 | 1279 | 676 | 35   |
| 0   | 86  | 347  | 133 | 0    |
| 12  | 146 | 549  | 60  | 35   |
| 0   | 44  | 0    | 0   | 39   |
| 0   | 0   | 0    | 12  | 329  |
| 10  | 0   | 0    | 0   | 0    |

|      |      |     |      |      |
|------|------|-----|------|------|
| 0    | 10   | 20  | 90   | 41   |
| 0    | 0    | 0   | 35   | 32   |
| 212  | 10   | 0   | 0    | 0    |
| 0    | 0    | 0   | 12   | 0    |
| 10   | 0    | 62  | 266  | 1773 |
| 112  | 950  | 562 | 986  | 9304 |
| 0    | 0    | 0   | 11   | 0    |
| 11   | 61   | 454 | 227  | 232  |
| 0    | 42   | 50  | 28   | 10   |
| 0    | 79   | 0   | 514  | 111  |
| 12   | 0    | 0   | 22   | 0    |
| 22   | 17   | 0   | 20   | 0    |
| 1218 | 2454 | 121 | 514  | 1830 |
| 36   | 0    | 0   | 0    | 0    |
| 13   | 0    | 0   | 0    | 0    |
| 98   | 45   | 0   | 0    | 412  |
| 0    | 0    | 0   | 0    | 0    |
| 101  | 0    | 0   | 0    | 0    |
| 328  | 981  | 98  | 2860 | 4197 |
| 0    | 0    | 0   | 0    | 0    |
| 10   | 0    | 0   | 0    | 0    |
| 0    | 0    | 0   | 0    | 0    |
| 0    | 0    | 0   | 0    | 0    |
| 429  | 290  | 0   | 107  | 20   |
| 130  | 105  | 0   | 0    | 0    |
| 142  | 70   | 0   | 64   | 187  |
| 20   | 11   | 0   | 0    | 0    |
| 67   | 56   | 0   | 112  | 0    |
| 94   | 54   | 28  | 56   | 77   |
| 0    | 0    | 0   | 0    | 0    |
| 87   | 36   | 0   | 16   | 0    |
| 109  | 43   | 0   | 24   | 0    |
| 0    | 0    | 0   | 0    | 0    |
| 112  | 223  | 0   | 49   | 632  |
| 64   | 0    | 0   | 97   | 130  |
| 27   | 0    | 0   | 0    | 0    |
| 0    | 0    | 0   | 0    | 0    |
| 36   | 11   | 0   | 49   | 0    |
| 61   | 42   | 13  | 0    | 0    |
| 160  | 13   | 13  | 0    | 28   |
| 61   | 0    | 0   | 0    | 0    |
| 10   | 0    | 137 | 11   | 252  |
| 278  | 14   | 0   | 0    | 0    |
| 39   | 39   | 0   | 0    | 0    |
| 0    | 0    | 0   | 0    | 0    |
| 419  | 856  | 31  | 0    | 34   |

|      |      |     |     |     |
|------|------|-----|-----|-----|
| 256  | 0    | 43  | 127 | 34  |
| 154  | 0    | 35  | 0   | 0   |
| 0    | 0    | 0   | 0   | 0   |
| 32   | 44   | 0   | 55  | 0   |
| 260  | 53   | 46  | 75  | 10  |
| 44   | 65   | 0   | 0   | 48  |
| 47   | 51   | 0   | 10  | 0   |
| 146  | 95   | 0   | 30  | 0   |
| 0    | 0    | 0   | 0   | 0   |
| 52   | 0    | 0   | 0   | 0   |
| 388  | 482  | 21  | 240 | 29  |
| 65   | 51   | 0   | 17  | 0   |
| 683  | 461  | 23  | 309 | 49  |
| 112  | 32   | 0   | 63  | 0   |
| 138  | 105  | 12  | 186 | 13  |
| 100  | 63   | 0   | 52  | 37  |
| 173  | 186  | 0   | 0   | 13  |
| 350  | 160  | 0   | 0   | 0   |
| 245  | 2069 | 0   | 149 | 15  |
| 219  | 0    | 0   | 0   | 0   |
| 547  | 0    | 0   | 0   | 0   |
| 59   | 75   | 0   | 50  | 0   |
| 27   | 175  | 0   | 31  | 0   |
| 141  | 262  | 0   | 172 | 0   |
| 255  | 76   | 0   | 47  | 10  |
| 174  | 101  | 29  | 12  | 0   |
| 531  | 210  | 161 | 128 | 143 |
| 141  | 56   | 29  | 83  | 73  |
| 553  | 200  | 105 | 69  | 150 |
| 53   | 0    | 0   | 0   | 0   |
| 0    | 13   | 0   | 0   | 212 |
| 27   | 77   | 12  | 0   | 75  |
| 11   | 19   | 0   | 12  | 70  |
| 27   | 138  | 0   | 12  | 115 |
| 0    | 0    | 0   | 40  | 36  |
| 39   | 32   | 0   | 0   | 0   |
| 0    | 0    | 0   | 0   | 96  |
| 225  | 140  | 17  | 124 | 41  |
| 205  | 64   | 16  | 46  | 0   |
| 122  | 0    | 0   | 0   | 33  |
| 228  | 321  | 63  | 258 | 27  |
| 205  | 51   | 32  | 21  | 0   |
| 1774 | 256  | 12  | 22  | 0   |
| 629  | 87   | 0   | 0   | 0   |
| 92   | 0    | 0   | 157 | 0   |
| 66   | 0    | 0   | 70  | 0   |

|     |     |     |     |      |
|-----|-----|-----|-----|------|
| 110 | 0   | 23  | 0   | 32   |
| 233 | 903 | 512 | 353 | 15   |
| 325 | 53  | 27  | 0   | 0    |
| 54  | 27  | 29  | 0   | 0    |
| 0   | 0   | 0   | 10  | 10   |
| 47  | 118 | 30  | 0   | 37   |
| 222 | 15  | 0   | 32  | 0    |
| 52  | 0   | 11  | 10  | 0    |
| 540 | 53  | 128 | 35  | 0    |
| 130 | 337 | 16  | 58  | 353  |
| 329 | 355 | 12  | 34  | 51   |
| 0   | 21  | 0   | 10  | 100  |
| 147 | 0   | 0   | 0   | 0    |
| 212 | 0   | 0   | 0   | 0    |
| 11  | 0   | 0   | 0   | 0    |
| 408 | 21  | 0   | 0   | 0    |
| 111 | 505 | 35  | 113 | 165  |
| 140 | 189 | 0   | 98  | 11   |
| 242 | 62  | 0   | 33  | 0    |
| 0   | 0   | 0   | 0   | 0    |
| 52  | 109 | 70  | 24  | 48   |
| 875 | 0   | 0   | 0   | 0    |
| 40  | 34  | 0   | 0   | 0    |
| 11  | 0   | 0   | 0   | 0    |
| 188 | 0   | 0   | 0   | 0    |
| 28  | 51  | 15  | 13  | 31   |
| 12  | 0   | 0   | 78  | 0    |
| 19  | 61  | 0   | 54  | 72   |
| 0   | 0   | 0   | 0   | 0    |
| 0   | 0   | 0   | 0   | 0    |
| 0   | 0   | 0   | 0   | 0    |
| 67  | 27  | 0   | 0   | 0    |
| 0   | 0   | 0   | 0   | 0    |
| 0   | 0   | 0   | 0   | 0    |
| 45  | 0   | 0   | 40  | 0    |
| 0   | 0   | 0   | 0   | 0    |
| 62  | 102 | 56  | 95  | 92   |
| 49  | 365 | 152 | 195 | 130  |
| 0   | 23  | 0   | 25  | 0    |
| 0   | 49  | 25  | 48  | 0    |
| 0   | 48  | 11  | 253 | 14   |
| 514 | 758 | 0   | 815 | 1453 |
| 14  | 0   | 0   | 0   | 0    |
| 0   | 0   | 0   | 0   | 0    |
| 13  | 51  | 0   | 0   | 83   |
| 346 | 19  | 12  | 125 | 164  |

|     |     |     |     |     |
|-----|-----|-----|-----|-----|
| 0   | 0   | 0   | 0   | 0   |
| 0   | 0   | 0   | 0   | 0   |
| 33  | 115 | 56  | 52  | 0   |
| 0   | 57  | 0   | 72  | 142 |
| 85  | 0   | 0   | 88  | 123 |
| 0   | 0   | 0   | 0   | 36  |
| 23  | 0   | 0   | 14  | 0   |
| 61  | 188 | 0   | 39  | 215 |
| 0   | 0   | 0   | 0   | 0   |
| 49  | 91  | 15  | 0   | 178 |
| 57  | 130 | 0   | 142 | 292 |
| 49  | 21  | 0   | 0   | 0   |
| 38  | 59  | 0   | 0   | 0   |
| 37  | 10  | 0   | 0   | 10  |
| 97  | 49  | 0   | 0   | 0   |
| 23  | 34  | 0   | 0   | 0   |
| 0   | 0   | 0   | 43  | 0   |
| 0   | 0   | 0   | 0   | 0   |
| 12  | 15  | 0   | 0   | 0   |
| 34  | 63  | 0   | 12  | 27  |
| 0   | 0   | 0   | 11  | 0   |
| 0   | 0   | 0   | 61  | 0   |
| 0   | 14  | 0   | 0   | 0   |
| 0   | 0   | 0   | 0   | 0   |
| 0   | 0   | 0   | 0   | 0   |
| 0   | 0   | 0   | 0   | 0   |
| 44  | 32  | 0   | 36  | 35  |
| 32  | 34  | 0   | 32  | 0   |
| 39  | 26  | 0   | 10  | 0   |
| 0   | 0   | 0   | 0   | 0   |
| 75  | 45  | 0   | 0   | 16  |
| 91  | 46  | 0   | 16  | 13  |
| 25  | 38  | 0   | 12  | 0   |
| 0   | 0   | 0   | 0   | 0   |
| 499 | 528 | 606 | 149 | 648 |
| 0   | 24  | 259 | 75  | 48  |
| 12  | 0   | 0   | 0   | 0   |
| 0   | 0   | 27  | 0   | 0   |
| 267 | 529 | 169 | 64  | 180 |
| 22  | 0   | 0   | 23  | 22  |
| 10  | 17  | 0   | 0   | 0   |
| 107 | 25  | 0   | 0   | 0   |
| 106 | 0   | 0   | 34  | 0   |
| 0   | 0   | 0   | 0   | 0   |
| 179 | 15  | 0   | 92  | 86  |
| 45  | 0   | 0   | 23  | 0   |

|     |     |     |     |      |
|-----|-----|-----|-----|------|
| 337 | 0   | 0   | 106 | 14   |
| 69  | 0   | 0   | 0   | 0    |
| 0   | 0   | 0   | 0   | 0    |
| 13  | 0   | 0   | 13  | 0    |
| 50  | 87  | 0   | 12  | 10   |
| 97  | 86  | 15  | 0   | 10   |
| 0   | 11  | 0   | 0   | 0    |
| 72  | 88  | 0   | 13  | 0    |
| 43  | 51  | 0   | 0   | 0    |
| 36  | 12  | 0   | 0   | 0    |
| 10  | 12  | 0   | 0   | 0    |
| 0   | 0   | 0   | 0   | 0    |
| 42  | 53  | 0   | 0   | 0    |
| 80  | 58  | 0   | 0   | 0    |
| 47  | 71  | 0   | 0   | 0    |
| 35  | 34  | 0   | 47  | 0    |
| 47  | 73  | 0   | 39  | 0    |
| 23  | 0   | 0   | 0   | 0    |
| 344 | 0   | 0   | 0   | 0    |
| 189 | 0   | 0   | 0   | 0    |
| 64  | 0   | 0   | 0   | 0    |
| 0   | 0   | 0   | 0   | 0    |
| 46  | 0   | 0   | 0   | 0    |
| 75  | 53  | 0   | 10  | 134  |
| 35  | 126 | 14  | 63  | 361  |
| 146 | 85  | 0   | 10  | 281  |
| 0   | 12  | 0   | 0   | 22   |
| 39  | 56  | 0   | 0   | 68   |
| 51  | 0   | 0   | 0   | 0    |
| 259 | 0   | 0   | 49  | 0    |
| 56  | 0   | 0   | 0   | 0    |
| 45  | 51  | 0   | 93  | 0    |
| 115 | 0   | 0   | 0   | 0    |
| 0   | 0   | 0   | 0   | 0    |
| 11  | 0   | 0   | 0   | 112  |
| 34  | 11  | 0   | 41  | 0    |
| 93  | 0   | 0   | 110 | 0    |
| 10  | 56  | 0   | 96  | 0    |
| 0   | 64  | 0   | 121 | 0    |
| 0   | 0   | 0   | 0   | 0    |
| 277 | 282 | 452 | 142 | 1195 |
| 260 | 51  | 52  | 116 | 37   |
| 18  | 125 | 0   | 0   | 0    |
| 61  | 0   | 0   | 145 | 10   |
| 25  | 0   | 0   | 29  | 0    |
| 0   | 0   | 0   | 0   | 0    |



|      |      |     |     |      |
|------|------|-----|-----|------|
| 40   | 67   | 0   | 229 | 0    |
| 0    | 0    | 0   | 0   | 0    |
| 473  | 545  | 12  | 196 | 24   |
| 38   | 218  | 0   | 27  | 0    |
| 132  | 104  | 0   | 31  | 0    |
| 273  | 1075 | 0   | 62  | 15   |
| 40   | 0    | 0   | 0   | 0    |
| 89   | 90   | 0   | 0   | 0    |
| 569  | 370  | 11  | 75  | 36   |
| 12   | 0    | 0   | 47  | 0    |
| 45   | 0    | 74  | 609 | 0    |
| 10   | 0    | 61  | 164 | 0    |
| 0    | 0    | 0   | 268 | 108  |
| 112  | 0    | 0   | 90  | 10   |
| 174  | 148  | 73  | 24  | 139  |
| 57   | 134  | 0   | 0   | 501  |
| 0    | 130  | 10  | 43  | 99   |
| 123  | 73   | 14  | 42  | 2662 |
| 0    | 0    | 0   | 0   | 0    |
| 24   | 34   | 0   | 0   | 0    |
| 34   | 31   | 0   | 0   | 0    |
| 318  | 63   | 26  | 295 | 50   |
| 134  | 78   | 0   | 0   | 0    |
| 498  | 0    | 0   | 0   | 0    |
| 409  | 0    | 0   | 0   | 0    |
| 22   | 0    | 0   | 0   | 0    |
| 297  | 0    | 0   | 0   | 0    |
| 65   | 186  | 55  | 195 | 1052 |
| 0    | 35   | 0   | 48  | 0    |
| 33   | 42   | 0   | 0   | 0    |
| 337  | 150  | 39  | 100 | 66   |
| 140  | 147  | 91  | 53  | 0    |
| 313  | 67   | 32  | 0   | 89   |
| 410  | 0    | 0   | 0   | 0    |
| 2133 | 0    | 0   | 0   | 0    |
| 574  | 0    | 0   | 0   | 0    |
| 415  | 0    | 0   | 0   | 0    |
| 14   | 0    | 0   | 32  | 84   |
| 24   | 142  | 386 | 44  | 169  |
| 12   | 30   | 0   | 0   | 0    |
| 45   | 73   | 16  | 0   | 435  |
| 219  | 230  | 22  | 41  | 28   |
| 35   | 34   | 26  | 0   | 0    |
| 543  | 674  | 0   | 50  | 0    |
| 112  | 139  | 0   | 103 | 0    |
| 37   | 34   | 0   | 0   | 0    |

|     |     |    |     |      |
|-----|-----|----|-----|------|
| 618 | 562 | 21 | 84  | 27   |
| 13  | 26  | 17 | 0   | 0    |
| 75  | 15  | 0  | 13  | 0    |
| 143 | 129 | 0  | 0   | 0    |
| 32  | 39  | 40 | 27  | 10   |
| 115 | 73  | 0  | 134 | 0    |
| 0   | 95  | 11 | 31  | 77   |
| 354 | 53  | 0  | 25  | 0    |
| 15  | 376 | 55 | 0   | 926  |
| 30  | 263 | 42 | 38  | 269  |
| 38  | 0   | 0  | 10  | 50   |
| 92  | 281 | 0  | 45  | 72   |
| 109 | 40  | 0  | 0   | 0    |
| 35  | 0   | 29 | 0   | 99   |
| 120 | 47  | 0  | 39  | 175  |
| 250 | 144 | 0  | 0   | 0    |
| 69  | 0   | 0  | 35  | 0    |
| 10  | 0   | 0  | 0   | 0    |
| 48  | 167 | 26 | 0   | 2531 |
| 0   | 24  | 0  | 87  | 0    |
| 0   | 99  | 22 | 35  | 0    |
| 71  | 35  | 0  | 0   | 187  |
| 12  | 57  | 0  | 0   | 171  |
| 11  | 28  | 0  | 40  | 0    |
| 0   | 16  | 18 | 101 | 0    |
| 43  | 0   | 11 | 0   | 0    |
| 0   | 0   | 0  | 25  | 0    |
| 21  | 0   | 0  | 0   | 0    |
| 51  | 0   | 0  | 28  | 0    |
| 0   | 31  | 0  | 0   | 0    |
| 0   | 12  | 0  | 0   | 0    |
| 48  | 102 | 0  | 0   | 0    |
| 72  | 329 | 91 | 121 | 0    |
| 12  | 280 | 0  | 0   | 0    |
| 0   | 0   | 0  | 0   | 0    |
| 45  | 118 | 59 | 268 | 92   |
| 12  | 20  | 0  | 27  | 10   |
| 0   | 22  | 0  | 0   | 0    |
| 0   | 0   | 0  | 0   | 0    |
| 42  | 0   | 0  | 27  | 0    |
| 14  | 0   | 0  | 0   | 0    |
| 0   | 0   | 0  | 0   | 0    |
| 38  | 0   | 0  | 0   | 0    |
| 0   | 0   | 0  | 0   | 0    |
| 13  | 11  | 0  | 0   | 36   |
| 0   | 10  | 17 | 10  | 0    |

|    |     |     |     |      |
|----|-----|-----|-----|------|
| 14 | 60  | 0   | 11  | 52   |
| 0  | 0   | 0   | 0   | 12   |
| 0  | 11  | 0   | 0   | 163  |
| 32 | 414 | 0   | 0   | 79   |
| 0  | 147 | 92  | 449 | 372  |
| 0  | 0   | 10  | 0   | 0    |
| 0  | 58  | 0   | 0   | 48   |
| 0  | 92  | 0   | 0   | 0    |
| 57 | 68  | 0   | 0   | 0    |
| 44 | 77  | 0   | 0   | 0    |
| 0  | 10  | 0   | 0   | 0    |
| 25 | 91  | 0   | 304 | 0    |
| 0  | 33  | 0   | 0   | 0    |
| 25 | 43  | 11  | 0   | 35   |
| 48 | 27  | 0   | 0   | 181  |
| 0  | 0   | 10  | 0   | 0    |
| 0  | 35  | 0   | 10  | 60   |
| 0  | 0   | 0   | 0   | 99   |
| 0  | 0   | 0   | 14  | 0    |
| 44 | 53  | 12  | 29  | 64   |
| 0  | 48  | 0   | 0   | 0    |
| 13 | 15  | 0   | 14  | 0    |
| 17 | 31  | 11  | 0   | 186  |
| 0  | 42  | 12  | 13  | 121  |
| 0  | 0   | 53  | 0   | 29   |
| 10 | 65  | 72  | 0   | 3098 |
| 39 | 136 | 18  | 153 | 162  |
| 0  | 29  | 11  | 20  | 21   |
| 11 | 21  | 11  | 0   | 15   |
| 0  | 0   | 52  | 0   | 23   |
| 12 | 33  | 0   | 0   | 33   |
| 0  | 0   | 0   | 13  | 0    |
| 0  | 0   | 0   | 0   | 21   |
| 0  | 42  | 74  | 192 | 181  |
| 0  | 0   | 22  | 93  | 0    |
| 0  | 57  | 156 | 44  | 0    |
| 0  | 0   | 62  | 0   | 0    |
| 0  | 0   | 0   | 0   | 0    |
| 0  | 133 | 22  | 27  | 291  |
| 35 | 44  | 0   | 11  | 66   |
| 0  | 0   | 0   | 13  | 1390 |
| 0  | 12  | 0   | 0   | 0    |
| 0  | 0   | 11  | 0   | 0    |
| 0  | 0   | 0   | 0   | 0    |
| 0  | 0   | 37  | 116 | 0    |
| 19 | 0   | 0   | 0   | 10   |

|     |     |     |     |      |
|-----|-----|-----|-----|------|
| 23  | 0   | 16  | 24  | 383  |
| 0   | 34  | 861 | 0   | 146  |
| 0   | 0   | 0   | 0   | 27   |
| 0   | 0   | 23  | 11  | 221  |
| 0   | 14  | 64  | 0   | 356  |
| 0   | 0   | 39  | 0   | 0    |
| 36  | 27  | 0   | 29  | 0    |
| 12  | 244 | 0   | 0   | 0    |
| 43  | 90  | 0   | 32  | 27   |
| 169 | 312 | 0   | 91  | 38   |
| 0   | 0   | 0   | 0   | 0    |
| 0   | 0   | 0   | 0   | 34   |
| 13  | 29  | 0   | 13  | 0    |
| 0   | 0   | 0   | 0   | 0    |
| 0   | 0   | 0   | 0   | 0    |
| 0   | 0   | 0   | 0   | 0    |
| 0   | 0   | 0   | 23  | 0    |
| 0   | 234 | 0   | 84  | 50   |
| 36  | 87  | 0   | 695 | 821  |
| 52  | 0   | 26  | 159 | 1277 |
| 12  | 10  | 0   | 0   | 164  |
| 10  | 10  | 0   | 0   | 0    |
| 0   | 0   | 17  | 0   | 0    |
| 0   | 0   | 28  | 0   | 0    |
| 0   | 0   | 29  | 0   | 77   |
| 10  | 0   | 42  | 0   | 123  |
| 0   | 112 | 0   | 136 | 769  |
| 0   | 0   | 42  | 0   | 679  |
| 0   | 0   | 10  | 0   | 122  |
| 0   | 21  | 83  | 0   | 671  |
| 0   | 0   | 0   | 0   | 66   |
| 0   | 0   | 0   | 0   | 12   |
| 15  | 20  | 38  | 0   | 175  |
| 0   | 0   | 206 | 0   | 78   |
| 0   | 664 | 0   | 352 | 2196 |
| 40  | 27  | 22  | 0   | 200  |
| 0   | 31  | 0   | 10  | 182  |
| 0   | 0   | 0   | 0   | 0    |
| 0   | 0   | 0   | 0   | 0    |
| 0   | 0   | 0   | 0   | 0    |
| 0   | 0   | 0   | 0   | 0    |
| 0   | 0   | 0   | 0   | 0    |
| 0   | 0   | 0   | 0   | 0    |
| 0   | 0   | 0   | 0   | 0    |
| 0   | 0   | 0   | 0   | 0    |
| 16  | 0   | 0   | 0   | 0    |

[illegible]

|     |    |     |    |     |
|-----|----|-----|----|-----|
| 72  | 0  | 0   | 0  | 0   |
| 27  | 0  | 0   | 0  | 0   |
| 0   | 0  | 0   | 0  | 0   |
| 0   | 0  | 0   | 0  | 0   |
| 0   | 0  | 0   | 0  | 0   |
| 0   | 0  | 0   | 0  | 0   |
| 0   | 0  | 0   | 0  | 0   |
| 0   | 0  | 0   | 0  | 0   |
| 0   | 42 | 0   | 0  | 0   |
| 0   | 0  | 0   | 0  | 0   |
| 0   | 0  | 0   | 0  | 0   |
| 0   | 0  | 0   | 0  | 0   |
| 178 | 29 | 0   | 0  | 0   |
| 0   | 0  | 0   | 0  | 0   |
| 0   | 0  | 0   | 0  | 0   |
| 0   | 0  | 0   | 0  | 0   |
| 0   | 0  | 59  | 0  | 0   |
| 0   | 0  | 0   | 0  | 0   |
| 0   | 0  | 0   | 0  | 0   |
| 0   | 0  | 0   | 0  | 0   |
| 0   | 0  | 0   | 0  | 0   |
| 0   | 0  | 0   | 0  | 0   |
| 0   | 0  | 0   | 0  | 0   |
| 0   | 0  | 0   | 0  | 0   |
| 0   | 0  | 0   | 0  | 0   |
| 0   | 0  | 0   | 0  | 0   |
| 0   | 0  | 0   | 0  | 0   |
| 0   | 0  | 0   | 0  | 0   |
| 0   | 0  | 0   | 0  | 0   |
| 0   | 0  | 0   | 0  | 0   |
| 0   | 0  | 0   | 0  | 0   |
| 0   | 0  | 108 | 23 | 22  |
| 0   | 0  | 0   | 0  | 0   |
| 0   | 0  | 0   | 0  | 0   |
| 0   | 0  | 0   | 0  | 0   |
| 0   | 0  | 0   | 0  | 0   |
| 0   | 0  | 0   | 0  | 0   |
| 0   | 0  | 0   | 0  | 0   |
| 0   | 0  | 0   | 0  | 0   |
| 0   | 0  | 0   | 0  | 0   |
| 0   | 0  | 0   | 0  | 0   |
| 0   | 0  | 0   | 0  | 0   |
| 31  | 0  | 0   | 0  | 0   |
| 0   | 0  | 0   | 0  | 0   |
| 0   | 0  | 0   | 0  | 0   |
| 0   | 0  | 0   | 0  | 0   |
| 0   | 11 | 0   | 0  | 0   |
| 0   | 38 | 0   | 0  | 18  |
| 0   | 12 | 0   | 0  | 183 |

|    |    |     |     |     |
|----|----|-----|-----|-----|
| 0  | 51 | 0   | 0   | 54  |
| 0  | 58 | 0   | 10  | 80  |
| 25 | 47 | 21  | 26  | 83  |
| 67 | 43 | 11  | 11  | 0   |
| 26 | 13 | 0   | 0   | 0   |
| 34 | 12 | 0   | 0   | 0   |
| 35 | 10 | 0   | 0   | 0   |
| 28 | 42 | 0   | 13  | 0   |
| 27 | 10 | 0   | 0   | 0   |
| 0  | 10 | 0   | 0   | 0   |
| 0  | 23 | 0   | 0   | 0   |
| 36 | 34 | 0   | 0   | 14  |
| 0  | 33 | 0   | 0   | 0   |
| 10 | 11 | 0   | 0   | 0   |
| 12 | 13 | 0   | 44  | 0   |
| 0  | 10 | 0   | 0   | 0   |
| 0  | 16 | 0   | 0   | 0   |
| 0  | 42 | 0   | 0   | 100 |
| 0  | 14 | 0   | 0   | 67  |
| 26 | 73 | 0   | 0   | 67  |
| 14 | 10 | 0   | 0   | 38  |
| 0  | 11 | 0   | 0   | 0   |
| 0  | 11 | 0   | 0   | 0   |
| 0  | 10 | 0   | 30  | 0   |
| 0  | 38 | 13  | 52  | 0   |
| 11 | 12 | 0   | 12  | 0   |
| 0  | 15 | 0   | 0   | 0   |
| 0  | 12 | 0   | 0   | 0   |
| 0  | 24 | 0   | 0   | 0   |
| 0  | 30 | 0   | 14  | 0   |
| 0  | 46 | 178 | 127 | 21  |
| 0  | 19 | 0   | 0   | 0   |
| 56 | 90 | 0   | 0   | 179 |
| 0  | 12 | 0   | 0   | 0   |
| 0  | 16 | 0   | 23  | 0   |
| 0  | 10 | 0   | 0   | 0   |
| 13 | 50 | 0   | 0   | 0   |
| 0  | 25 | 0   | 0   | 0   |
| 98 | 15 | 14  | 12  | 0   |
| 0  | 13 | 0   | 79  | 0   |
| 14 | 17 | 0   | 0   | 0   |
| 0  | 11 | 0   | 0   | 0   |
| 0  | 21 | 0   | 25  | 0   |
| 12 | 15 | 0   | 0   | 0   |
| 0  | 16 | 0   | 0   | 0   |
| 0  | 54 | 0   | 0   | 0   |

|     |     |     |     |     |
|-----|-----|-----|-----|-----|
| 0   | 43  | 0   | 0   | 0   |
| 49  | 15  | 41  | 108 | 10  |
| 46  | 17  | 0   | 21  | 0   |
| 10  | 10  | 0   | 47  | 0   |
| 0   | 22  | 0   | 0   | 222 |
| 35  | 13  | 169 | 0   | 10  |
| 0   | 22  | 194 | 0   | 0   |
| 0   | 10  | 34  | 0   | 0   |
| 10  | 17  | 0   | 0   | 0   |
| 0   | 31  | 0   | 0   | 0   |
| 10  | 91  | 0   | 0   | 0   |
| 0   | 104 | 0   | 22  | 0   |
| 23  | 39  | 0   | 22  | 0   |
| 0   | 110 | 0   | 0   | 0   |
| 28  | 52  | 0   | 31  | 0   |
| 10  | 11  | 0   | 13  | 0   |
| 43  | 57  | 0   | 0   | 0   |
| 0   | 42  | 0   | 0   | 0   |
| 24  | 25  | 0   | 0   | 0   |
| 107 | 50  | 0   | 13  | 0   |
| 0   | 13  | 0   | 0   | 0   |
| 125 | 10  | 0   | 0   | 0   |
| 0   | 10  | 0   | 0   | 0   |
| 0   | 15  | 0   | 0   | 0   |
| 0   | 10  | 0   | 0   | 0   |
| 10  | 48  | 0   | 0   | 0   |
| 0   | 10  | 0   | 0   | 0   |
| 0   | 11  | 0   | 0   | 0   |
| 0   | 21  | 0   | 0   | 0   |
| 17  | 10  | 0   | 0   | 0   |
| 0   | 20  | 0   | 0   | 0   |
| 0   | 32  | 0   | 0   | 0   |
| 0   | 12  | 0   | 31  | 0   |
| 0   | 115 | 0   | 904 | 524 |
| 0   | 24  | 0   | 0   | 0   |
| 0   | 10  | 0   | 0   | 0   |
| 0   | 10  | 0   | 0   | 0   |
| 0   | 59  | 0   | 172 | 12  |
| 0   | 12  | 0   | 0   | 0   |
| 0   | 13  | 0   | 10  | 0   |
| 0   | 26  | 0   | 0   | 15  |
| 85  | 12  | 0   | 27  | 292 |
| 0   | 60  | 0   | 151 | 31  |
| 0   | 21  | 0   | 15  | 0   |
| 0   | 10  | 0   | 0   | 0   |
| 0   | 71  | 29  | 0   | 0   |



|    |    |     |     |      |
|----|----|-----|-----|------|
| 14 | 23 | 0   | 0   | 0    |
| 30 | 10 | 0   | 49  | 11   |
| 0  | 10 | 102 | 0   | 39   |
| 0  | 26 | 11  | 0   | 18   |
| 0  | 10 | 0   | 0   | 0    |
| 10 | 15 | 0   | 0   | 0    |
| 25 | 20 | 0   | 0   | 0    |
| 13 | 34 | 0   | 10  | 0    |
| 0  | 11 | 0   | 0   | 0    |
| 0  | 16 | 0   | 0   | 23   |
| 0  | 12 | 0   | 0   | 0    |
| 0  | 12 | 0   | 0   | 0    |
| 26 | 10 | 0   | 0   | 0    |
| 0  | 31 | 0   | 0   | 0    |
| 0  | 11 | 0   | 0   | 0    |
| 44 | 21 | 0   | 0   | 0    |
| 21 | 44 | 0   | 0   | 0    |
| 0  | 11 | 0   | 0   | 36   |
| 0  | 28 | 0   | 0   | 0    |
| 0  | 71 | 25  | 0   | 314  |
| 58 | 12 | 0   | 11  | 0    |
| 0  | 17 | 0   | 0   | 0    |
| 0  | 33 | 0   | 26  | 57   |
| 0  | 14 | 12  | 53  | 0    |
| 0  | 21 | 0   | 0   | 0    |
| 0  | 16 | 0   | 0   | 30   |
| 0  | 57 | 0   | 0   | 0    |
| 0  | 13 | 0   | 0   | 0    |
| 0  | 46 | 0   | 0   | 173  |
| 0  | 35 | 0   | 0   | 0    |
| 0  | 45 | 0   | 0   | 0    |
| 0  | 42 | 11  | 81  | 0    |
| 19 | 13 | 0   | 0   | 0    |
| 0  | 13 | 52  | 237 | 541  |
| 0  | 34 | 47  | 37  | 235  |
| 0  | 67 | 63  | 116 | 309  |
| 0  | 67 | 0   | 399 | 10   |
| 0  | 65 | 115 | 533 | 1183 |
| 0  | 10 | 0   | 0   | 0    |
| 0  | 24 | 57  | 58  | 115  |
| 11 | 20 | 0   | 39  | 0    |
| 0  | 42 | 0   | 0   | 0    |
| 0  | 36 | 10  | 0   | 0    |
| 0  | 27 | 0   | 0   | 0    |
| 0  | 11 | 0   | 0   | 0    |
| 0  | 14 | 0   | 0   | 10   |

[illegible]

[illegible]

|    |   |     |     |     |
|----|---|-----|-----|-----|
| 0  | 0 | 0   | 0   | 0   |
| 0  | 0 | 0   | 0   | 0   |
| 0  | 0 | 0   | 0   | 0   |
| 0  | 0 | 0   | 10  | 0   |
| 0  | 0 | 13  | 0   | 0   |
| 24 | 0 | 0   | 10  | 0   |
| 0  | 0 | 0   | 0   | 0   |
| 0  | 0 | 0   | 0   | 12  |
| 0  | 0 | 0   | 0   | 0   |
| 0  | 0 | 0   | 0   | 0   |
| 0  | 0 | 0   | 0   | 0   |
| 0  | 0 | 0   | 10  | 86  |
| 0  | 0 | 0   | 0   | 0   |
| 0  | 0 | 0   | 0   | 0   |
| 0  | 0 | 0   | 0   | 305 |
| 0  | 0 | 32  | 0   | 0   |
| 0  | 0 | 0   | 10  | 0   |
| 0  | 0 | 0   | 14  | 12  |
| 0  | 0 | 182 | 0   | 0   |
| 10 | 0 | 0   | 13  | 14  |
| 0  | 0 | 0   | 0   | 0   |
| 13 | 0 | 0   | 0   | 0   |
| 0  | 0 | 37  | 44  | 0   |
| 34 | 0 | 0   | 0   | 0   |
| 0  | 0 | 0   | 157 | 0   |
| 0  | 0 | 0   | 0   | 0   |
| 0  | 0 | 0   | 0   | 0   |
| 0  | 0 | 0   | 0   | 0   |
| 0  | 0 | 13  | 0   | 67  |
| 0  | 0 | 0   | 0   | 0   |
| 0  | 0 | 0   | 0   | 0   |
| 0  | 0 | 0   | 0   | 0   |
| 0  | 0 | 0   | 0   | 0   |
| 0  | 0 | 0   | 0   | 0   |
| 0  | 0 | 0   | 38  | 0   |
| 0  | 0 | 0   | 29  | 0   |
| 0  | 0 | 0   | 0   | 0   |
| 0  | 0 | 0   | 38  | 0   |
| 0  | 0 | 0   | 63  | 13  |
| 0  | 0 | 0   | 0   | 0   |
| 0  | 0 | 0   | 0   | 0   |
| 0  | 0 | 0   | 0   | 0   |
| 0  | 0 | 0   | 0   | 0   |
| 0  | 0 | 0   | 0   | 13  |
| 0  | 0 | 0   | 0   | 0   |
| 0  | 0 | 0   | 0   | 0   |

|    |   |     |     |     |
|----|---|-----|-----|-----|
| 0  | 0 | 0   | 0   | 0   |
| 0  | 0 | 0   | 57  | 0   |
| 0  | 0 | 0   | 246 | 0   |
| 0  | 0 | 0   | 0   | 0   |
| 36 | 0 | 0   | 18  | 0   |
| 0  | 0 | 0   | 16  | 0   |
| 27 | 0 | 0   | 57  | 37  |
| 0  | 0 | 14  | 0   | 0   |
| 0  | 0 | 0   | 0   | 0   |
| 41 | 0 | 0   | 0   | 0   |
| 10 | 0 | 12  | 57  | 0   |
| 0  | 0 | 0   | 0   | 0   |
| 0  | 0 | 0   | 0   | 0   |
| 0  | 0 | 0   | 0   | 0   |
| 0  | 0 | 0   | 0   | 25  |
| 32 | 0 | 0   | 0   | 68  |
| 0  | 0 | 46  | 36  | 65  |
| 0  | 0 | 0   | 0   | 0   |
| 0  | 0 | 0   | 0   | 0   |
| 0  | 0 | 0   | 0   | 0   |
| 0  | 0 | 0   | 10  | 20  |
| 0  | 0 | 0   | 0   | 0   |
| 0  | 0 | 0   | 32  | 0   |
| 28 | 0 | 0   | 12  | 13  |
| 0  | 0 | 0   | 0   | 0   |
| 0  | 0 | 0   | 0   | 145 |
| 30 | 0 | 0   | 22  | 11  |
| 0  | 0 | 120 | 0   | 0   |
| 0  | 0 | 0   | 0   | 0   |
| 0  | 0 | 0   | 0   | 0   |
| 0  | 0 | 0   | 0   | 0   |
| 0  | 0 | 0   | 11  | 0   |
| 0  | 0 | 0   | 0   | 0   |
| 0  | 0 | 0   | 0   | 0   |
| 0  | 0 | 0   | 0   | 0   |
| 0  | 0 | 0   | 0   | 0   |
| 0  | 0 | 0   | 0   | 37  |
| 0  | 0 | 0   | 0   | 80  |
| 0  | 0 | 35  | 0   | 0   |
| 0  | 0 | 0   | 42  | 0   |
| 0  | 0 | 0   | 12  | 41  |
| 0  | 0 | 0   | 0   | 0   |
| 0  | 0 | 0   | 12  | 0   |
| 0  | 0 | 28  | 18  | 0   |
| 0  | 0 | 0   | 0   | 12  |

[illegible]

[illegible]

|    |   |    |     |     |
|----|---|----|-----|-----|
| 17 | 0 | 0  | 0   | 0   |
| 0  | 0 | 0  | 0   | 0   |
| 0  | 0 | 0  | 0   | 0   |
| 0  | 0 | 0  | 0   | 0   |
| 0  | 0 | 0  | 48  | 0   |
| 0  | 0 | 0  | 0   | 21  |
| 0  | 0 | 0  | 0   | 0   |
| 0  | 0 | 0  | 0   | 0   |
| 0  | 0 | 0  | 0   | 0   |
| 0  | 0 | 0  | 0   | 0   |
| 0  | 0 | 0  | 0   | 0   |
| 0  | 0 | 0  | 0   | 0   |
| 0  | 0 | 0  | 0   | 0   |
| 0  | 0 | 0  | 0   | 0   |
| 0  | 0 | 0  | 0   | 0   |
| 12 | 0 | 0  | 0   | 0   |
| 0  | 0 | 0  | 0   | 0   |
| 0  | 0 | 0  | 0   | 0   |
| 73 | 0 | 0  | 0   | 0   |
| 0  | 0 | 0  | 0   | 0   |
| 0  | 0 | 0  | 0   | 0   |
| 12 | 0 | 0  | 10  | 0   |
| 27 | 0 | 0  | 31  | 0   |
| 0  | 0 | 0  | 10  | 0   |
| 0  | 0 | 0  | 0   | 0   |
| 0  | 0 | 0  | 0   | 19  |
| 0  | 0 | 0  | 0   | 0   |
| 0  | 0 | 0  | 0   | 0   |
| 17 | 0 | 0  | 0   | 30  |
| 0  | 0 | 0  | 16  | 0   |
| 0  | 0 | 0  | 0   | 0   |
| 14 | 0 | 0  | 11  | 0   |
| 0  | 0 | 0  | 0   | 0   |
| 0  | 0 | 12 | 0   | 11  |
| 32 | 0 | 35 | 142 | 41  |
| 0  | 0 | 0  | 0   | 400 |
| 0  | 0 | 0  | 0   | 0   |
| 55 | 0 | 0  | 0   | 0   |
| 0  | 0 | 0  | 10  | 98  |
| 0  | 0 | 0  | 0   | 0   |
| 26 | 0 | 0  | 0   | 16  |
| 0  | 0 | 0  | 0   | 0   |
| 0  | 0 | 0  | 0   | 0   |
| 0  | 0 | 22 | 22  | 857 |
| 0  | 0 | 0  | 0   | 0   |
| 0  | 0 | 0  | 0   | 0   |



|    |   |    |    |    |
|----|---|----|----|----|
| 0  | 0 | 0  | 0  | 27 |
| 0  | 0 | 37 | 0  | 0  |
| 0  | 0 | 0  | 0  | 0  |
| 0  | 0 | 0  | 0  | 0  |
| 0  | 0 | 0  | 0  | 38 |
| 36 | 0 | 0  | 0  | 0  |
| 16 | 0 | 0  | 0  | 0  |
| 0  | 0 | 0  | 0  | 0  |
| 0  | 0 | 0  | 0  | 0  |
| 0  | 0 | 0  | 0  | 61 |
| 0  | 0 | 0  | 0  | 0  |
| 0  | 0 | 0  | 0  | 0  |
| 0  | 0 | 0  | 0  | 0  |
| 0  | 0 | 0  | 0  | 0  |
| 0  | 0 | 0  | 0  | 0  |
| 0  | 0 | 0  | 10 | 0  |
| 0  | 0 | 0  | 0  | 0  |
| 36 | 0 | 0  | 0  | 0  |
| 10 | 0 | 0  | 0  | 0  |
| 0  | 0 | 0  | 0  | 0  |
| 10 | 0 | 0  | 0  | 0  |
| 11 | 0 | 0  | 0  | 0  |
| 0  | 0 | 0  | 0  | 0  |
| 0  | 0 | 0  | 33 | 0  |
| 0  | 0 | 0  | 0  | 0  |
| 0  | 0 | 0  | 0  | 0  |
| 0  | 0 | 0  | 0  | 11 |
| 0  | 0 | 0  | 0  | 0  |
| 0  | 0 | 0  | 0  | 0  |
| 0  | 0 | 13 | 0  | 48 |
| 0  | 0 | 0  | 10 | 0  |
| 0  | 0 | 0  | 0  | 0  |
| 0  | 0 | 0  | 0  | 0  |
| 41 | 0 | 0  | 0  | 0  |
| 0  | 0 | 0  | 0  | 0  |
| 0  | 0 | 0  | 0  | 0  |
| 0  | 0 | 0  | 0  | 0  |
| 0  | 0 | 0  | 0  | 0  |
| 0  | 0 | 0  | 0  | 0  |
| 0  | 0 | 0  | 0  | 0  |
| 14 | 0 | 0  | 0  | 0  |
| 0  | 0 | 0  | 0  | 0  |
| 13 | 0 | 0  | 0  | 0  |
| 0  | 0 | 0  | 10 | 0  |
| 0  | 0 | 0  | 0  | 0  |
| 0  | 0 | 0  | 0  | 0  |

|     |   |   |     |    |
|-----|---|---|-----|----|
| 0   | 0 | 0 | 0   | 0  |
| 0   | 0 | 0 | 0   | 0  |
| 45  | 0 | 0 | 0   | 16 |
| 0   | 0 | 0 | 0   | 0  |
| 0   | 0 | 0 | 0   | 0  |
| 0   | 0 | 0 | 0   | 0  |
| 0   | 0 | 0 | 0   | 0  |
| 0   | 0 | 0 | 0   | 0  |
| 0   | 0 | 0 | 10  | 0  |
| 0   | 0 | 0 | 0   | 0  |
| 0   | 0 | 0 | 0   | 0  |
| 0   | 0 | 0 | 0   | 0  |
| 0   | 0 | 0 | 21  | 0  |
| 0   | 0 | 0 | 0   | 0  |
| 0   | 0 | 0 | 0   | 0  |
| 0   | 0 | 0 | 0   | 0  |
| 0   | 0 | 0 | 152 | 0  |
| 0   | 0 | 0 | 0   | 0  |
| 0   | 0 | 0 | 0   | 0  |
| 0   | 0 | 0 | 0   | 0  |
| 0   | 0 | 0 | 0   | 0  |
| 0   | 0 | 0 | 55  | 0  |
| 0   | 0 | 0 | 0   | 0  |
| 139 | 0 | 0 | 0   | 0  |
| 0   | 0 | 0 | 0   | 0  |
| 0   | 0 | 0 | 0   | 0  |
| 0   | 0 | 0 | 0   | 0  |
| 11  | 0 | 0 | 0   | 0  |
| 0   | 0 | 0 | 0   | 0  |
| 0   | 0 | 0 | 0   | 0  |
| 0   | 0 | 0 | 0   | 0  |
| 0   | 0 | 0 | 0   | 28 |
| 0   | 0 | 0 | 0   | 0  |
| 0   | 0 | 0 | 0   | 0  |
| 0   | 0 | 0 | 0   | 0  |
| 12  | 0 | 0 | 0   | 0  |
| 95  | 0 | 0 | 0   | 0  |
| 11  | 0 | 0 | 0   | 0  |
| 12  | 0 | 0 | 40  | 0  |
| 10  | 0 | 0 | 0   | 0  |
| 12  | 0 | 0 | 0   | 0  |
| 61  | 0 | 0 | 0   | 0  |
| 22  | 0 | 0 | 0   | 20 |
| 11  | 0 | 0 | 0   | 0  |
| 12  | 0 | 0 | 0   | 0  |
| 10  | 0 | 0 | 0   | 0  |
| 10  | 0 | 0 | 0   | 0  |

|     |   |    |    |    |
|-----|---|----|----|----|
| 10  | 0 | 0  | 0  | 0  |
| 49  | 0 | 0  | 0  | 0  |
| 10  | 0 | 0  | 0  | 0  |
| 30  | 0 | 0  | 0  | 0  |
| 10  | 0 | 0  | 0  | 0  |
| 54  | 0 | 0  | 0  | 0  |
| 25  | 0 | 0  | 0  | 0  |
| 16  | 0 | 0  | 0  | 0  |
| 14  | 0 | 0  | 0  | 0  |
| 13  | 0 | 0  | 0  | 0  |
| 10  | 0 | 0  | 0  | 0  |
| 13  | 0 | 0  | 10 | 0  |
| 15  | 0 | 0  | 0  | 0  |
| 20  | 0 | 0  | 0  | 0  |
| 10  | 0 | 0  | 0  | 0  |
| 48  | 0 | 0  | 0  | 0  |
| 25  | 0 | 0  | 0  | 0  |
| 23  | 0 | 0  | 0  | 0  |
| 12  | 0 | 0  | 0  | 0  |
| 18  | 0 | 0  | 0  | 0  |
| 67  | 0 | 50 | 10 | 0  |
| 46  | 0 | 0  | 0  | 0  |
| 26  | 0 | 0  | 0  | 0  |
| 13  | 0 | 0  | 0  | 0  |
| 42  | 0 | 0  | 0  | 0  |
| 11  | 0 | 0  | 0  | 0  |
| 10  | 0 | 0  | 0  | 0  |
| 56  | 0 | 0  | 0  | 0  |
| 122 | 0 | 0  | 0  | 0  |
| 66  | 0 | 0  | 0  | 0  |
| 24  | 0 | 0  | 0  | 0  |
| 11  | 0 | 0  | 0  | 0  |
| 56  | 0 | 0  | 0  | 0  |
| 59  | 0 | 0  | 0  | 0  |
| 48  | 0 | 0  | 0  | 0  |
| 48  | 0 | 0  | 0  | 0  |
| 10  | 0 | 0  | 0  | 0  |
| 122 | 0 | 0  | 0  | 0  |
| 45  | 0 | 0  | 0  | 0  |
| 39  | 0 | 0  | 0  | 0  |
| 46  | 0 | 0  | 0  | 0  |
| 10  | 0 | 0  | 0  | 0  |
| 28  | 0 | 0  | 0  | 0  |
| 12  | 0 | 0  | 0  | 0  |
| 42  | 0 | 0  | 0  | 0  |
| 11  | 0 | 0  | 0  | 11 |

|     |   |   |     |    |
|-----|---|---|-----|----|
| 40  | 0 | 0 | 0   | 0  |
| 82  | 0 | 0 | 0   | 0  |
| 14  | 0 | 0 | 22  | 0  |
| 15  | 0 | 0 | 0   | 0  |
| 33  | 0 | 0 | 0   | 0  |
| 43  | 0 | 0 | 0   | 0  |
| 128 | 0 | 0 | 0   | 0  |
| 271 | 0 | 0 | 0   | 0  |
| 13  | 0 | 0 | 0   | 0  |
| 68  | 0 | 0 | 0   | 0  |
| 13  | 0 | 0 | 0   | 0  |
| 18  | 0 | 0 | 0   | 0  |
| 39  | 0 | 0 | 0   | 0  |
| 18  | 0 | 0 | 0   | 0  |
| 50  | 0 | 0 | 0   | 0  |
| 43  | 0 | 0 | 0   | 0  |
| 12  | 0 | 0 | 0   | 0  |
| 14  | 0 | 0 | 0   | 0  |
| 10  | 0 | 0 | 0   | 0  |
| 10  | 0 | 0 | 0   | 0  |
| 14  | 0 | 0 | 0   | 0  |
| 39  | 0 | 0 | 0   | 0  |
| 12  | 0 | 0 | 0   | 0  |
| 10  | 0 | 0 | 0   | 0  |
| 29  | 0 | 0 | 0   | 0  |
| 24  | 0 | 0 | 0   | 0  |
| 11  | 0 | 0 | 0   | 0  |
| 22  | 0 | 0 | 0   | 0  |
| 11  | 0 | 0 | 0   | 0  |
| 39  | 0 | 0 | 0   | 0  |
| 28  | 0 | 0 | 0   | 0  |
| 12  | 0 | 0 | 0   | 0  |
| 10  | 0 | 0 | 0   | 0  |
| 90  | 0 | 0 | 0   | 0  |
| 23  | 0 | 0 | 0   | 0  |
| 30  | 0 | 0 | 0   | 11 |
| 33  | 0 | 0 | 0   | 0  |
| 10  | 0 | 0 | 0   | 0  |
| 10  | 0 | 0 | 0   | 0  |
| 10  | 0 | 0 | 0   | 0  |
| 13  | 0 | 0 | 0   | 0  |
| 0   | 0 | 0 | 41  | 0  |
| 0   | 0 | 0 | 11  | 0  |
| 0   | 0 | 0 | 27  | 0  |
| 0   | 0 | 0 | 106 | 0  |
| 0   | 0 | 0 | 60  | 0  |

|   |   |   |     |    |
|---|---|---|-----|----|
| 0 | 0 | 0 | 14  | 0  |
| 0 | 0 | 0 | 33  | 38 |
| 0 | 0 | 0 | 34  | 0  |
| 0 | 0 | 0 | 28  | 0  |
| 0 | 0 | 0 | 10  | 0  |
| 0 | 0 | 0 | 25  | 0  |
| 0 | 0 | 0 | 76  | 0  |
| 0 | 0 | 0 | 41  | 0  |
| 0 | 0 | 0 | 10  | 0  |
| 0 | 0 | 0 | 37  | 0  |
| 0 | 0 | 0 | 79  | 0  |
| 0 | 0 | 0 | 12  | 0  |
| 0 | 0 | 0 | 12  | 0  |
| 0 | 0 | 0 | 16  | 0  |
| 0 | 0 | 0 | 11  | 0  |
| 0 | 0 | 0 | 21  | 0  |
| 0 | 0 | 0 | 33  | 0  |
| 0 | 0 | 0 | 12  | 0  |
| 0 | 0 | 0 | 39  | 0  |
| 0 | 0 | 0 | 29  | 0  |
| 0 | 0 | 0 | 66  | 0  |
| 0 | 0 | 0 | 12  | 0  |
| 0 | 0 | 0 | 15  | 0  |
| 0 | 0 | 0 | 12  | 0  |
| 0 | 0 | 0 | 14  | 0  |
| 0 | 0 | 0 | 12  | 0  |
| 0 | 0 | 0 | 31  | 0  |
| 0 | 0 | 0 | 11  | 0  |
| 0 | 0 | 0 | 12  | 0  |
| 0 | 0 | 0 | 28  | 0  |
| 0 | 0 | 0 | 11  | 44 |
| 0 | 0 | 0 | 10  | 0  |
| 0 | 0 | 0 | 295 | 0  |
| 0 | 0 | 0 | 10  | 0  |
| 0 | 0 | 0 | 22  | 0  |
| 0 | 0 | 0 | 14  | 0  |
| 0 | 0 | 0 | 10  | 0  |
| 0 | 0 | 0 | 28  | 0  |
| 0 | 0 | 0 | 54  | 0  |
| 0 | 0 | 0 | 69  | 0  |
| 0 | 0 | 0 | 14  | 0  |
| 0 | 0 | 0 | 33  | 0  |
| 0 | 0 | 0 | 10  | 0  |
| 0 | 0 | 0 | 23  | 0  |
| 0 | 0 | 0 | 52  | 0  |
| 0 | 0 | 0 | 10  | 0  |

[illegible]

[illegible]

[illegible]



[illegible]

[illegible]

[illegible]

[illegible]

[illegible]

[illegible]

[illegible]

| Phylum         | Genus             | CS_242 | CS_249 | CS_273 | CS_280 |
|----------------|-------------------|--------|--------|--------|--------|
| Proteobacteria | Acinetobacter     | 1122   | 1164   | 1396   | 822    |
| Actinobacteria | Brachybacterium   | 0      | 0      | 0      | 0      |
| Bacteroidetes  | Chryseobacterium  | 805    | 709    | 207    | 103    |
| Proteobacteria | Comamonas         | 0      | 0      | 0      | 0      |
| Actinobacteria | Corynebacterium   | 1730   | 86     | 420    | 403    |
| Proteobacteria | Devosia           | 118    | 852    | 361    | 1598   |
| Bacteroidetes  | Flavobacterium    | 1157   | 907    | 390    | 341    |
| Firmicutes     | Kurthia           | 0      | 0      | 0      | 0      |
| Proteobacteria | Luteimonas        | 263    | 693    | 177    | 7047   |
| Proteobacteria | Paracoccus        | 266    | 876    | 293    | 282    |
| Firmicutes     | Planomicrobium    | 0      | 0      | 0      | 0      |
| Proteobacteria | Pseudomonas       | 1200   | 1114   | 403    | 1692   |
| Actinobacteria | Saccharopolyspora | 4223   | 329    | 1215   | 42     |
| Proteobacteria | Sphingomonas      | 1663   | 4232   | 854    | 1136   |
| Proteobacteria | Stenotrophomonas  | 0      | 0      | 0      | 0      |



**Table S2: Top 10 abundant genera in each placental region.**

| CS_282 | CS_283 | CS_288 | CS_302 | CS_307 | CS_324 | CS_329 |
|--------|--------|--------|--------|--------|--------|--------|
| 436    | 487    | 0      | 2204   | 4098   | 315    | 27     |
| 0      | 0      | 0      | 0      | 0      | 0      | 0      |
| 2238   | 3707   | 12     | 417    | 4345   | 76     | 274    |
| 0      | 0      | 0      | 0      | 0      | 0      | 0      |
| 836    | 1303   | 0      | 451    | 2615   | 550    | 134    |
| 4505   | 4149   | 0      | 1521   | 1071   | 0      | 51     |
| 1424   | 2998   | 0      | 880    | 2942   | 0      | 59     |
| 0      | 0      | 0      | 0      | 0      | 0      | 0      |
| 2484   | 3675   | 38     | 273    | 1224   | 227    | 253    |
| 6357   | 4596   | 10     | 15     | 6917   | 29     | 96     |
| 0      | 0      | 0      | 0      | 0      | 0      | 0      |
| 593    | 2204   | 0      | 509    | 444    | 118    | 134    |
| 5194   | 284    | 10     | 766    | 338    | 11     | 0      |
| 5892   | 5722   | 0      | 1539   | 3322   | 132    | 314    |
| 0      | 0      | 0      | 0      | 0      | 0      | 0      |

| CS_332 | CS_333 | CS_340 | CS_341 | CS_348 | PH_242 | PH_249 |
|--------|--------|--------|--------|--------|--------|--------|
| 78     | 1202   | 2915   | 74     | 286    | 0      | 0      |
| 0      | 0      | 0      | 0      | 0      | 0      | 0      |
| 259    | 614    | 1631   | 168    | 103    | 38     | 345    |
| 0      | 0      | 0      | 0      | 0      | 70     | 577    |
| 78     | 1258   | 7693   | 615    | 2679   | 169    | 918    |
| 0      | 284    | 1349   | 250    | 911    | 0      | 717    |
| 51     | 843    | 1524   | 241    | 1254   | 166    | 225    |
| 0      | 0      | 0      | 0      | 0      | 0      | 0      |
| 32     | 668    | 1261   | 460    | 2418   | 12     | 576    |
| 44     | 156    | 2294   | 270    | 314    | 15     | 887    |
| 0      | 0      | 0      | 0      | 0      | 180    | 46     |
| 105    | 3125   | 2714   | 268    | 1171   | 59     | 412    |
| 199    | 136    | 0      | 131    | 7378   | 0      | 0      |
| 136    | 4158   | 2321   | 463    | 1094   | 333    | 1543   |
| 0      | 0      | 0      | 0      | 0      | 0      | 0      |

| PH_273 | PH_280 | PH_282 | PH_283 | PH_302 | PH_307 | PH_324 |
|--------|--------|--------|--------|--------|--------|--------|
| 0      | 0      | 0      | 0      | 0      | 0      | 0      |
| 0      | 0      | 0      | 0      | 0      | 0      | 0      |
| 181    | 42     | 1677   | 1782   | 365    | 1593   | 53     |
| 372    | 465    | 164    | 133    | 1963   | 966    | 1124   |
| 863    | 393    | 1897   | 359    | 729    | 2111   | 2470   |
| 180    | 692    | 4559   | 5768   | 200    | 464    | 15     |
| 152    | 278    | 560    | 2137   | 1025   | 1669   | 440    |
| 0      | 0      | 0      | 0      | 0      | 0      | 0      |
| 29     | 773    | 2639   | 2532   | 221    | 914    | 188    |
| 23     | 69     | 4254   | 4245   | 128    | 1660   | 88     |
| 0      | 25     | 135    | 73     | 874    | 9258   | 43     |
| 10     | 630    | 287    | 252    | 324    | 530    | 298    |
| 0      | 0      | 0      | 0      | 0      | 0      | 0      |
| 354    | 505    | 6330   | 4800   | 985    | 2785   | 383    |
| 0      | 0      | 0      | 0      | 0      | 0      | 0      |

| PH_329 | PH_331 | PH_332 | PH_333 | PH_340 | PH_348 | UC_242 |
|--------|--------|--------|--------|--------|--------|--------|
| 0      | 0      | 0      | 0      | 0      | 0      | 670    |
| 0      | 0      | 0      | 0      | 0      | 0      | 229    |
| 3485   | 64     | 0      | 615    | 202    | 0      | 484    |
| 1455   | 98     | 35     | 2001   | 1486   | 588    | 0      |
| 1553   | 33     | 45     | 2043   | 1435   | 1134   | 474    |
| 2112   | 0      | 0      | 342    | 138    | 237    | 176    |
| 3907   | 144    | 0      | 1591   | 262    | 145    | 0      |
| 0      | 0      | 0      | 0      | 0      | 0      | 1687   |
| 1735   | 39     | 29     | 325    | 191    | 1646   | 111    |
| 4213   | 20     | 23     | 0      | 158    | 96     | 201    |
| 1444   | 41     | 345    | 115    | 140    | 30     | 0      |
| 2754   | 52     | 49     | 2632   | 1686   | 1599   | 314    |
| 0      | 0      | 0      | 0      | 0      | 0      | 0      |
| 3491   | 157    | 32     | 3264   | 963    | 365    | 0      |
| 0      | 0      | 0      | 0      | 0      | 0      | 476    |

| UC_249 | UC_261 | UC_273 | UC_280 | UC_282 | UC_283 | UC_288 |
|--------|--------|--------|--------|--------|--------|--------|
| 448    | 653    | 1804   | 306    | 793    | 576    | 82     |
| 213    | 445    | 0      | 360    | 65     | 319    | 22     |
| 141    | 561    | 375    | 4335   | 63     | 9739   | 84     |
| 0      | 0      | 0      | 0      | 0      | 0      | 0      |
| 186    | 830    | 605    | 128    | 154    | 186    | 89     |
| 110    | 125    | 579    | 3780   | 46     | 6358   | 21     |
| 0      | 0      | 0      | 0      | 0      | 0      | 0      |
| 306    | 477    | 225    | 2687   | 0      | 345    | 369    |
| 259    | 233    | 87     | 1198   | 307    | 2371   | 142    |
| 76     | 163    | 49     | 324    | 176    | 6869   | 71     |
| 0      | 0      | 0      | 0      | 0      | 0      | 0      |
| 144    | 127    | 617    | 1346   | 29     | 104    | 197    |
| 0      | 0      | 0      | 0      | 0      | 0      | 0      |
| 0      | 0      | 0      | 0      | 0      | 0      | 0      |
| 447    | 306    | 535    | 7281   | 113    | 2624   | 451    |

| UC_302 | UC_307 | UC_324 | UC_329 | UC_332 | UC_333 | UC_340 |
|--------|--------|--------|--------|--------|--------|--------|
| 2082   | 990    | 1807   | 5183   | 1319   | 1133   | 1796   |
| 430    | 3913   | 2610   | 2210   | 1232   | 916    | 1662   |
| 316    | 1646   | 122    | 641    | 15     | 593    | 1137   |
| 0      | 0      | 0      | 0      | 0      | 0      | 0      |
| 505    | 1916   | 2344   | 2371   | 489    | 1240   | 2939   |
| 241    | 492    | 69     | 2190   | 181    | 436    | 1030   |
| 0      | 0      | 0      | 0      | 0      | 0      | 0      |
| 1350   | 1236   | 544    | 1746   | 1461   | 2374   | 925    |
| 152    | 878    | 395    | 4373   | 928    | 831    | 864    |
| 82     | 1209   | 233    | 3289   | 430    | 167    | 1123   |
| 0      | 0      | 0      | 0      | 0      | 0      | 0      |
| 124    | 359    | 195    | 2908   | 717    | 3863   | 3954   |
| 0      | 0      | 0      | 0      | 0      | 0      | 0      |
| 0      | 0      | 0      | 0      | 0      | 0      | 0      |
| 1073   | 2058   | 623    | 3162   | 678    | 2472   | 1263   |

| UC_341 | UC_342 | UC_348 |
|--------|--------|--------|
| 626    | 1477   | 1994   |
| 2657   | 862    | 1665   |
| 163    | 1095   | 35     |
| 0      | 0      | 0      |
| 689    | 1366   | 5367   |
| 535    | 1810   | 2267   |
| 0      | 0      | 0      |
| 574    | 1025   | 632    |
| 1405   | 1280   | 4830   |
| 1191   | 887    | 988    |
| 0      | 0      | 0      |
| 438    | 1295   | 3417   |
| 0      | 0      | 0      |
| 0      | 0      | 0      |
| 520    | 1939   | 1069   |
